# Supplementary material for: Differential Selective Constraints Shaping Codon Usage Pattern of Housekeeping and Tissue-specific Homologous Genes of Rice and Arabidopsis
Source: PubMed Central journal article supplement — DNA Res. 2008 Sep 30;15(6):347–56. doi: 10.1093/dnares/dsn023 (PMC2608846; doi:10.1093/dnares/dsn023), 2008-09-30
Supplement: dsn023_1.pdf [file dsn023_1.pdf]

**Supplementary Table 1:** Gene-ID list of rice-Arabidopsis homologous gene pairs with their corresponding functional descriptions.

| <i>Rice Gene ID</i> | <i>Functional Description</i>                 | <i>Arabidopsis Gene ID</i> | <i>Functional Description</i>                                                                                   |
|---------------------|-----------------------------------------------|----------------------------|-----------------------------------------------------------------------------------------------------------------|
| 10A19I.12           | ADP Glucose                                   | At1g27680                  | APL2 (Large Subunit Of AGP 2)                                                                                   |
| 10A19I.3            | Integral Membrane Protein                     | At1g19450                  | Integral Membrane Protein, Putative / Sugar Transporter Family Protein                                          |
| 24K23.23            | Putative Amylogenin                           | At3g08900                  | RGP3 (REVERSIBLY GLYCOSYLATED POLYPEPTIDE 3); Alpha-1,4-Glucan-Protein Synthase (UDP-Forming)                   |
| 49D11.23            | Putative AAA-Type Atpase                      | At2g18330                  | AAA-Type Atpase Family Protein                                                                                  |
| B1011A07.10         | Putative Pectinesterase                       | At4g02330                  | Pectinesterase Family Protein                                                                                   |
| B1011A07.16         | Putative Pectinesterase 2.1 Precursor         | At1g53830                  | ATPME2 (Arabidopsis Thaliana Pectin Methyl-esterase 2)                                                          |
| B1011A07.20         | Putative Endo-1,3(4)-Beta-Glucanase           | At4g02290                  | Glycosyl Hydrolase Family 9 Protein                                                                             |
| B1011A07.31         | Putative Branched Chain Alpha-Keto Acid       | At3g06850                  | DIN3/LTA1 (DARK INDUCIBLE 3); Alpha-Ketoacid Dehydrogenase                                                      |
| B1012D10.16         | Phospholipase-Like Protein                    | At2g39420                  | Esterase/Lipase/Thioesterase Family Protein                                                                     |
| B1012D10.2          | MCT-1 Protein-Like                            | At1g09150                  | Pseudouridine Synthase And Archaeosine Transglycosylase (PUA) Domain-Containing Protein                         |
| B1015E06.16         | Putative CRK1 Protein                         | At1g53050                  | Protein Kinase Family Protein                                                                                   |
| B1015E06.2          | Hypothetical Protein                          | At5g61500                  | Autophagy 3 (APG3)                                                                                              |
| B1015E06.5          | Hypothetical Protein                          | At5g11640                  | Unknown Protein                                                                                                 |
| B1026C12.20         | Putative Speckle-Type POZ Protein             | At2g39760                  | ATBPM3; Protein Binding                                                                                         |
| B1026C12.22         | Putative Sterol 4-Alpha-Methyl-Oxidase        | At2g29390                  | SMO2-1 (Sterol 4-Alpha-Methyl-Oxidase 1)                                                                        |
| B1026C12.3          | Putative Ethylene-Inducible Protein           | At5g01410                  | PDX1 (PYRIDOXINE BIOSYNTHESIS 1.3); Protein Heterodimerization/ Protein Homodimerization                        |
| B1026C12.33         | Unknown Protein                               | At1g61900                  | Unknown Protein                                                                                                 |
| B1029H08.10         | Putative Thylakoid Lumenal 21.5 Kda Protein,  | At4g15510                  | Calcium Ion Binding                                                                                             |
| B1040D09.4          | Putative RNA Helicase                         | At5g08610                  | DEAD Box RNA Helicase (RH26)                                                                                    |
| B1045D11.20         | Unknown Protein                               | At3g53410                  | Zinc Finger (C3HC4-Type RING Finger) Family Protein                                                             |
| B1045D11.4          | Putative Asparaginyl-Trna Synthetase          | At1g70980                  | SYNC1; ATP Binding / Aminoacyl-Trna Ligase/ Asparagine-Trna Ligase/ Aspartate-Trna Ligase/ Nucleic Acid Binding |
| B1046G12.25         | Putative Phosphoribosylaminoimidazole         | At2g37690                  | Phosphoribosylaminoimidazole Carboxylase, Putative / AIR Carboxylase, Putative                                  |
| B1047A05.37         | Putative 60S Ribosomal Protein L7             | At3g13580                  | 60S Ribosomal Protein L7 (RPL7D)                                                                                |
| B1047A05.39         | Hypothetical Protein                          | At4g17620                  | Glycine-Rich Protein                                                                                            |
| B1051E10.16         | Putative Serine/Threonine Protein Phosphatase | At3g05580                  | Serine/Threonine Protein Phosphatase, Putative                                                                  |
| B1053A04.20-2       | Sexual Differentiation Process Protein        | At5g64410                  | ATOPT4 (Oligopeptide Transporter 4); Oligopeptide Transporter                                                   |

|               |                                                  |           |                                                                                                                                    |
|---------------|--------------------------------------------------|-----------|------------------------------------------------------------------------------------------------------------------------------------|
| B1056G08.109  | Putative 3-Oxoacyl-[Acyl-Carrier-Protein]        | At1g74960 | FAB1 (FATTY ACID BIOSYNTHESIS 1); Fatty-Acid Synthase                                                                              |
| B1056G08.112  | Putative (S)-2-Hydroxy-Acid Oxidase              | At3g14130 | (S)-2-Hydroxy-Acid Oxidase, Peroxisomal, Putative / Glycolate Oxidase, Putative / Short Chain Alpha-Hydroxy Acid Oxidase, Putative |
| B1060H01.15   | Putative Flavonol Glucosyltransferase            | At1g01390 | UDP-Glucuronosyl/UDP-Glucosyl Transferase Family Protein                                                                           |
| B1060H01.16   | Putative Flavonol Glucosyltransferase            | At3g16520 | UDP-Glucuronosyl/UDP-Glucosyl Transferase Family Protein                                                                           |
| B1060H01.23   | Putative Flavonol Glucosyltransferase            | At5g26310 | UDP-Glucuronosyl/UDP-Glucosyl Transferase Family Protein                                                                           |
| B1060H01.29   | Putative 8-Amino-7-Oxononanoate Synthase         | At5g04620 | ATBIOF; 8-Amino-7-Oxononanoate Synthase/ Transaminase                                                                              |
| B1063H10.19   | Putative RPR1h                                   | At3g07040 | Rpm1 (Resistance To P. Syringae Pv Maculicola 1)                                                                                   |
| B1063H10.20   | Unknown Protein                                  | At1g68220 | Unknown Protein                                                                                                                    |
| B1063H10.8    | Hypothetical Protein                             | At4g30410 | Unknown Protein                                                                                                                    |
| B1064G04.16   | Similar To Membrane-Associated Salt-Inducible    | At1g10910 | Unknown Protein                                                                                                                    |
| B1064G04.22   | Asparaginyl Endopeptidase                        | At4g32940 | GAMMA-VPE (Vacuolar Processing Enzyme Gamma); Cysteine-Type Endopeptidase                                                          |
| B1064G04.27   | Putative IAA-Ala Hydrolase                       | At1g51760 | IAR3 (IAA-ALANINE RESISTANT 3); Metallopeptidase                                                                                   |
| B1065E10.17   | Putative Amino Acid Transport Protein            | At5g09220 | AAP2 (AMINO ACID PERMEASE 2); Amino Acid Permease                                                                                  |
| B1065E10.20   | Putative Serine/Threonine Protein Kinase         | At1g11050 | Protein Kinase Family Protein                                                                                                      |
| B1065E10.21   | MADS Box Protein                                 | At5g20240 | PI (PISTILLATA); DNA Binding / Transcription Factor                                                                                |
| B1065E10.30   | Ankyrin-Like Protein                             | At5g64030 | Dehydration-Responsive Protein-Related                                                                                             |
| B1065G12.20   | Putative Peptide Transport Protein               | At3g54140 | Proton-Dependent Oligopeptide Transport (POT) Family Protein                                                                       |
| B1066G12.15   | Unknown Protein                                  | At5g54860 | Integral Membrane Transporter Family Protein                                                                                       |
| B1070A12.14   | Putative Auxin-Responsive GH3                    | At5g54510 | DFL1 (DWARF IN LIGHT 1); Indole-3-Acetic Acid Amido Synthetase                                                                     |
| B1070A12.16   | Hypothetical Protein                             | At2g16030 | Unknown Protein                                                                                                                    |
| B1070A12.17   | Hypothetical Protein                             | At1g55890 | Pentatricopeptide (PPR) Repeat-Containing Protein                                                                                  |
| B1074C08.21   | Putative RNA-Directed RNA Polymerase             | At3g49500 | RDR6 (RNA-DEPENDENT RNA POLYMERASE 6); Nucleic Acid Binding                                                                        |
| B1075D06.2    | Hypothetical Protein                             | At5g16210 | HEAT Repeat-Containing Protein                                                                                                     |
| B1075D06.4    | Fimbrin-Like Protein (Actin Binding Motif)       | At5g48460 | Fimbrin-Like Protein, Putative                                                                                                     |
| B1075D06.5    | Putative Receptor-Like Protein Kinase            | At2g01210 | Leucine-Rich Repeat Transmembrane Protein Kinase, Putative                                                                         |
| B1075D06.6    | Putative Retrovirus-Related Pol Polyprotein From | At3g60170 | Transposable Element Gene                                                                                                          |
| B1077E10.18-1 | Putative Phosphoglycolate Phosphatase Precursor  | At5g47760 | ATPK5 (Arabidopsis Thaliana Serine/Threonine Protein Kinase 5); Phosphoglycolate Phosphatase                                       |
| B1078G07.15   | Putative Pectinacetylerase                       | At5g26665 | Unknown Protein                                                                                                                    |
| B1078G07.20   | Ankyrin-Kinase -Like Protein                     | At3g59830 | Ankyrin Protein Kinase, Putative                                                                                                   |
| B1078G07.4    | Putative Allyl Alcohol Dehydrogenase             | At1g65560 | Allyl Alcohol Dehydrogenase, Putative                                                                                              |
| B1080D07.14   | Ostatc                                           | At2g01110 | Apg2 (Albino And Pale Green 2)                                                                                                     |
| B1080D07.15   | Putative 33kda Oxygen Evolvingprotein Of         | At3g50820 | PSBO-2/PSBO2 (PHOTOSYSTEM II SUBUNIT O-2); Oxygen Evolving                                                                         |
| B1088C09.1    | Hypothetical Protein                             | At2g40400 | Unknown Protein                                                                                                                    |
| B1088C09.4    | Putative Laccase                                 | At5g05390 | LAC12 (Laccase 12); Copper Ion Binding / Oxidoreductase                                                                            |

|               |                                                 |           |                                                                                                                                                 |
|---------------|-------------------------------------------------|-----------|-------------------------------------------------------------------------------------------------------------------------------------------------|
| B1088C09.6    | Putative Leucine Zipper Protein                 | At1g07000 | ATEXO70B2 (Exocyst Subunit EXO70 Family Protein B2); Protein Binding                                                                            |
| B1088C09.7    | Putative Leucine Zipper Protein                 | At2g28640 | ATEXO70H5 (Exocyst Subunit EXO70 Family Protein H5); Protein Binding                                                                            |
| B1090H08.30   | Putative Cytochrome B-561                       | At5g38630 | ACYB-1 (Arabidopsis Cytochrome B561 -1); Carbon-Monoxide Oxygenase                                                                              |
| B1097D05.12   | Putative Lycopene Epsilon-Cyclase               | At5g57030 | LUT2 (LUTEIN DEFICIENT 2); Lycopene Epsilon Cyclase                                                                                             |
| B1097D05.13   | Putative Serine Threonine Kinase                | At5g26150 | Protein Kinase Family Protein                                                                                                                   |
| B1099D03.27   | Putative S-Receptor Kinase                      | At2g19130 | S-Locus Lectin Protein Kinase Family Protein                                                                                                    |
| B1099H05.23   | Putative Germin A                               | At5g39110 | Germin-Like Protein, Putative                                                                                                                   |
| B1100D10.21   | Putative Acyl-Coa:1-Acylglycerol-3-Phosphate    | At3g18850 | Lpat5                                                                                                                                           |
| B1100D10.32   | Unknown Protein                                 | At5g54490 | PBP1 (PINOID-BINDING PROTEIN 1); Calcium Ion Binding                                                                                            |
| B1100D10.34   | Putative Serine/Threonine Kinase                | At4g27300 | S-Locus Protein Kinase, Putative                                                                                                                |
| B1100H02.7    | Putative ARGONAUTE9 Protein                     | At2g27040 | Ago4 (Argonaute 4)                                                                                                                              |
| B1103G11.21   | Putative Auxin-Independent Growth Promoter      | At3g26370 | Unknown Protein                                                                                                                                 |
| B1108H10.18   | Putative Exopolysaccharurase Precursor          | At2g15450 | Glycoside Hydrolase Family 28 Protein / Polygalacturonase (Pectinase) Family Protein                                                            |
| B1108H10.8    | Unknown Protein                                 | At3g17210 | Stable Protein 1-Related                                                                                                                        |
| B1109A06.20   | Unknown Protein                                 | At2g32000 | DNA Binding / DNA Topoisomerase Type I                                                                                                          |
| B1111C09.4    | Putative 3-Dehydroquinate Dehydratase           | At3g06350 | EMB3004/MEE32 (EMBRYO DEFECTIVE 3004, Maternal Effect Embryo Arrest 32); 3-Dehydroquinate Dehydratase/ NADP Binding / Shikimate 5-Dehydrogenase |
| B1112D09.3    | Putative Root Hair Defective 3 (RHD3)           | At3g13870 | Rhd3 (Root Hair Defective 3)                                                                                                                    |
| B1114D08.16-1 | Putative RNA Helicase                           | At1g31970 | DEAD/DEAH Box Helicase, Putative                                                                                                                |
| B1114D08.4    | Putative Fertility Restorer Homologue           | At5g61990 | Pentatricopeptide (PPR) Repeat-Containing Protein                                                                                               |
| B1114E07.12   | Putative Adenylate Kinase, Chloroplast          | At5g35170 | Nucleotide Kinase                                                                                                                               |
| B1116H04.25   | Putative Activator Of 90 Kda Heat Shock Protein | At3g12050 | Aha1 Domain-Containing Protein                                                                                                                  |
| B1116H04.8    | Unknown Protein                                 | At1g55230 | Unknown Protein                                                                                                                                 |
| B1120F06.103  | Unknown Protein                                 | At5g63440 | Unknown Protein                                                                                                                                 |
| B1120F06.107  | Unknown Protein                                 | At1g24310 | Hypothetical Protein                                                                                                                            |
| B1121A12.18   | Putative Auxin-Independent Growth Promoter      | At5g15740 | Unknown Protein                                                                                                                                 |
| B1121A12.19   | Unknown Protein                                 | At5g55710 | Unknown Protein                                                                                                                                 |
| B1121A12.27   | MAP Kinase-Like                                 | At1g68940 | Armadillo/Beta-Catenin Repeat Protein-Related / U-Box Domain-Containing Protein                                                                 |
| B1121A12.37   | Putative Protease IV                            | At1g73990 | SPPA (Signal Peptide Peptidase); Protease IV/ Serine-Type Endopeptidase                                                                         |
| B1130G10.10   | Putative Protein Kinase                         | At1g52290 | Protein Kinase Family Protein                                                                                                                   |
| B1130G10.11   | Putative GTP-Binding Protein Rab7a              | At3g18820 | Atrabg3f/Atrab7b (Arabidopsis Rab Gtpase Homolog G3f); GTP Binding                                                                              |
| B1130G10.13   | Putative GTP-Binding Protein RIC2               | At1g16920 | RAB11 (ARABIDOPSIS RAB GTPASE HOMOLOG A1B); GTP Binding                                                                                         |
| B1130G10.17   | Putative Gamma-Glutamyl Hydrolase               | At1g78680 | ATGGH2 (GAMMA-GLUTAMYL HYDROLASE 2); Gamma-Glutamyl Hydrolase                                                                                   |
| B1130G10.20   | Unknown Protein                                 | At4g18930 | Cyclic Phosphodiesterase                                                                                                                        |
| B1130G10.22   | Putative GDSL-Like Lipase/Hydrolase             | At5g45670 | GDSL-Motif Lipase/Hydrolase Family Protein                                                                                                      |

|               |                                                 |           |                                                                                                   |
|---------------|-------------------------------------------------|-----------|---------------------------------------------------------------------------------------------------|
| B1130G10.4    | Hypothetical Protein                            | At5g46020 | Unknown Protein                                                                                   |
| B1131B07.14   | Putative RAB7A Protein (GTP-Binding Protein)    | At4g09720 | Atrabg3a; GTP Binding                                                                             |
| B1131B07.15   | Putative Zinc Finger Protein                    | At5g20220 | Zinc Knuckle (CCHC-Type) Family Protein                                                           |
| B1131G07.11   | Putative Elongation Factor 1-Gamma              | At1g57720 | Translation Elongation Factor                                                                     |
| B1131G07.12   | Elongation Factor 1-Gamma                       | At1g09640 | Elongation Factor 1B-Gamma, Putative / Eef-1B Gamma, Putative                                     |
| B1131G08.9    | Hypothetical Protein                            | At1g29190 | Pseudogene, Hypothetical Protein                                                                  |
| B1139B11.18   | Unknown Protein                                 | At2g41640 | Unknown Protein                                                                                   |
| B1139B11.7    | Hypothetical Protein                            | At2g26870 | Phosphoesterase Family Protein                                                                    |
| B1139B11.9    | Hypothetical Protein                            | At1g76640 | Calmodulin-Related Protein, Putative                                                              |
| B1140D12.9    | Putative Serine Carboxypeptidase II-Like        | At1g73280 | SCPL3 (Serine Carboxypeptidase-Like 3); Serine Carboxypeptidase                                   |
| B1142B04.23   | POZ Domain Protein Family-Like                  | At1g55760 | BTB/POZ Domain-Containing Protein                                                                 |
| B1142B04.25-1 | Putative Alkaline Alpha-Galactosidase Seed      | At1g55740 | ATSIP1 (ARABIDOPSIS THALIANA SEED IMBIBITION 1); Hydrolase, Hydrolyzing O-Glycosyl Compounds      |
| B1142B04.27   | Putative Cytochrome C Oxidase Subunit 15(COX15) | At5g56090 | Cox15 (Cytochrome C Oxidase 15)                                                                   |
| B1142C05.18   | Putative Cytidine Deaminase                     | At2g19570 | Cda1 (Cytidine Deaminase 1)                                                                       |
| B1142C05.30   | Rev Interacting Protein-Like                    | At5g08420 | RNA Binding                                                                                       |
| B1142C05.32   | Putative Myosin Heavy Chain                     | At1g54560 | XIE (Myosin-Like Protein XIE); Motor/ Protein Binding                                             |
| B1143G03.3    | Hypothetical Protein                            | At5g42410 | Auxin-Responsive Family Protein                                                                   |
| B1144B06.21   | Unknown Protein                                 | At1g19130 | Unknown Protein                                                                                   |
| B1144D11.19   | Putative Glutathione S-Transferase Osgstu4      | At1g69920 | ATGSTU12 (Arabidopsis Thaliana Glutathione S-Transferase (Class Tau) 12); Glutathione Transferase |
| B1144D11.20   | Putative NADP-Specific Glutamate                | At1g51720 | Glutamate Dehydrogenase, Putative                                                                 |
| B1144D11.26   | Putative Zinc Protease PQQL                     | At5g56730 | Peptidase M16 Family Protein / Insulinase Family Protein                                          |
| B1144D11.29   | Putative Seryl-Trna Synthetase                  | At5g27470 | Seryl-Trna Synthetase / Serine--Trna Ligase                                                       |
| B1147A04.10   | Unknown Protein                                 | At4g03290 | Calcium-Binding Protein, Putative                                                                 |
| B1147A04.12   | Putative Glutathione S-Transferase GST 24       | At2g29420 | ATGSTU7 (GLUTATHIONE S-TRANSFERASE 25); Glutathione Transferase                                   |
| B1147A04.23   | Putative Zinc Finger And C2 Domain Protein      | At3g07940 | Zinc Finger And C2 Domain Protein, Putative                                                       |
| B1147B12.16   | Putative Sulfate Transporter-Like               | At2g25680 | Sulfate Transporter                                                                               |
| B1148D12.5    | Putative Receptor Protein Kinase                | At5g49760 | Leucine-Rich Repeat Family Protein / Protein Kinase Family Protein                                |
| B1150F11.13   | Putative Glycerol-3-Phosphate Dehydrogenase     | At2g41540 | GPDHC1; Glycerol-3-Phosphate Dehydrogenase (NAD+)                                                 |
| B1150F11.20   | Putative Hexokinase                             | At1g50460 | Hexokinase, Putative                                                                              |
| B1151A10.15   | Putative Ftsh Protease                          | At2g26140 | FTSH4 (Ftsh Protease 4); ATP-Dependent Peptidase/ Atpase/ Metallopeptidase                        |
| B1151A10.18   | Putative ethylene-Responsive Protein            | At3g16050 | A37 (PYRIDOXINE BIOSYNTHESIS 1.2); Protein Heterodimerization                                     |
| B1155G07.14   | Unknown Protein                                 | At1g34470 | Permease-Related                                                                                  |
| B1155G07.16   | Putative Racc Protein                           | At4g28950 | ARAC7/ATROP9/RAC7/ROP9 (Rho-Related Protein From Plants 9); GTP Binding                           |

|               |                                                 |           |                                                                                                                                    |
|---------------|-------------------------------------------------|-----------|------------------------------------------------------------------------------------------------------------------------------------|
| B1155G07.17   | Unknown Protein                                 | At2g14260 | PIP (Proline Imino-peptidase); Prolyl Aminopeptidase                                                                               |
| B1156H12.13   | Putative DEAD BOX RNA Helicase                  | At5g11200 | DEAD/DEAH Box Helicase, Putative                                                                                                   |
| B1158C05.7    | Unknown Protein                                 | At1g06520 | ATGPAT1/GPAT1 (GLYCEROL-3-PHOSPHATE ACYLTRANSFERASE 1); 1-Acylglycerol-3-Phosphate O-Acyltransferase/ Acyltransferase              |
| B1168F12.22   | Transporter-Like Protein                        | At1g78130 | UNE2 (Unfertilized Embryo Sac 2); Carbohydrate Transporter/ Sugar Porter                                                           |
| B1168F12.32   | Zinc Finger (C3HC4-Type RING Finger)            | At2g35330 | Zinc Finger (C3HC4-Type RING Finger) Protein-Related                                                                               |
| B1168F12.6    | Putative Senc                                   | At3g08950 | Electron Transport SCO1/Senc Family Protein                                                                                        |
| B1203H11.11   | Putative Fructose-Bisphosphate Aldolase         | At2g36460 | Fructose-Bisphosphate Aldolase, Putative                                                                                           |
| B1203H11.9    | Putative MA3 Domain-Containing Protein          | At4g24800 | MA3 Domain-Containing Protein                                                                                                      |
| B1215B07.27-2 | Putative Cryptochrome 2                         | At1g04400 | Cry2 (Cryptochrome 2)                                                                                                              |
| B1215B07.31   | Putative Phosphoenolpyruvate Carboxylase Kinase | At3g04530 | PPCK2 (PHOSPHOENOLPYRUVATE CARBOXYLASE KINASE 2); Kinase                                                                           |
| B1215B07.34   | Putative Adenosine Kinase                       | At5g03300 | ADK2 (ADENOSINE KINASE 2); Kinase                                                                                                  |
| B1215B07.6    | Putative Lysyl-Trna Synthetase                  | At3g13490 | OVA5 (OVULE ABORTION 5); ATP Binding / Aminoacyl-Trna Ligase                                                                       |
| B1234D02.6    | Unknown Protein                                 | At5g43410 | Ethylene-Responsive Factor, Putative                                                                                               |
| B1248C03.14   | Unknown Protein                                 | At4g21630 | Subtilase Family Protein                                                                                                           |
| B1249D05.19   | Putative Pathogenesis-Related Protein           | At1g50060 | Pathogenesis-Related Protein, Putative                                                                                             |
| B1249D05.22   | Putative Pathogenesis-Related Protein           | At5g66590 | Allergen V5/Tpx-1-Related Family Protein                                                                                           |
| B1249D05.41   | PR-1 Type Pathogenesis-Related Protein PR-1a    | At4g25790 | Allergen V5/Tpx-1-Related Family Protein                                                                                           |
| B1250G12.14   | Putative Hupf2                                  | At2g39260 | RNA Binding                                                                                                                        |
| B1250G12.17   | Putative Response Regulator                     | At5g24470 | APRR5 (PSEUDO-RESPONSE REGULATOR 5); Transcription Regulator                                                                       |
| B1250G12.8    | Unknown Protein                                 | At3g01440 | Oxygen Evolving Enhancer 3 (Psbq) Family Protein                                                                                   |
| B1267B06.13   | MYB27 Protein-Like                              | At2g16720 | MYB7 (Myb Domain Protein 7); DNA Binding / Transcription Factor                                                                    |
| B1267B06.22   | Putative ORFX                                   | At1g14870 | Unknown Protein                                                                                                                    |
| B1307A11.10   | Putative Protein Kinase Xa21                    | At3g47580 | Leucine-Rich Repeat Transmembrane Protein Kinase, Putative                                                                         |
| B1339H09.17   | Putative Monoglyceride Lipase                   | At1g73480 | Hydrolase, Alpha/Beta Fold Family Protein                                                                                          |
| B1339H09.19   | Putative Annexin                                | At1g68090 | ANNAT5 (ANN5, ANNEXIN ARABIDOPSIS 5); Calcium Ion Binding / Calcium-Dependent Phospholipid Binding                                 |
| B1339H09.9    | Putative Hexose Transporter                     | At1g05030 | Hexose Transporter, Putative                                                                                                       |
| B1342F01.10   | Sucrose Transporter                             | At1g71890 | ATSUC5/SUC5 (SUCROSE-PROTON SYMPORTER 5); Carbohydrate Transporter/ Sucrose:Hydrogen Symporter/ Sugar Porter                       |
| B1342F01.15   | Zinc Finger (C3HC4-Type RING Finger)-Like       | At5g62460 | Zinc Finger (C3HC4-Type RING Finger) Family Protein                                                                                |
| B1342F01.34   | Putative UDP-Glycosyltransferase 85A8           | At1g22370 | UDP-Glucuronosyl/UDP-Glucosyl Transferase Family Protein                                                                           |
| B1358B12.15   | Unknown Protein                                 | At5g40770 | Atphb3 (Prohibitin 3)                                                                                                              |
| B1358B12.19   | Unknown Protein                                 | At2g01770 | VIT1 (VACUOLAR IRON TRANSPORTER 1); Iron Ion Transporter                                                                           |
| B1358B12.4    | Unknown Protein                                 | At1g68610 | Unknown Protein                                                                                                                    |
| B1364A02.11-1 | Putative Glycolate Oxidase                      | At3g14420 | (S)-2-Hydroxy-Acid Oxidase, Peroxisomal, Putative / Glycolate Oxidase, Putative / Short Chain Alpha-Hydroxy Acid Oxidase, Putative |

|                  |                                                 |           |                                                                                                    |
|------------------|-------------------------------------------------|-----------|----------------------------------------------------------------------------------------------------|
| B1364A02.2       | Putative LRR Receptor-Like Kinase               | At1g17230 | Leucine-Rich Repeat Family Protein / Protein Kinase Family Protein                                 |
| B1370C05.8       | Unknown Protein                                 | At3g51050 | FG-GAP Repeat-Containing Protein                                                                   |
| B1446H11.22      | Putative Alpha-Soluble NSF Attachment Protein   | At3g56190 | ALPHA-SNAP2 (ALPHA-SOLUBLE NSF ATTACHMENT PROTEIN); Soluble NSF Attachment Protein                 |
| B1469H02.22-1    | Putative Plasma Membrane Integral Protein       | At2g37170 | PIP2B (Plasma Membrane Intrinsic Protein 2;2); Water Channel                                       |
| B1469H02.8       | Phosphate Translocator-Like                     | At1g06890 | Transporter-Related                                                                                |
| C1275ERIPDM      | Putative Aquaporin                              | At5g47450 | Attip2;3 (Arabidopsis Thaliana Tonoplast Intrinsic Protein 2;3); Water Channel                     |
| H0212B02.3       | Putative Peroxidase                             | At1g44970 | Peroxidase, Putative                                                                               |
| H0302E05.5       | Putative Protein                                | At3g21610 | Unknown Protein                                                                                    |
| H0806H05.1       | Hypothetical Protein                            | At2g28670 | Disease Resistance-Responsive Family Protein / Fibroin-Related                                     |
| H0806H05.2       | Cysteine Synthase                               | At3g61440 | Atcysc1 (Beta-Substituted Ala Synthase 3;1)                                                        |
| H0811E11.2       | Contains Similarity To F6I7.30                  | At4g24820 | 26S Proteasome Regulatory Subunit, Putative (RPN7)                                                 |
| I1332.2          | Hypothetical Protein                            | At5g52060 | ATBAG1 (ARABIDOPSIS THALIANA BCL-2-ASSOCIATED ATHANOGENE 1); Protein Binding                       |
| I1332.6          | Unknown Protein                                 | At3g62940 | OTU-Like Cysteine Protease Family Protein                                                          |
| OAJNBa0031O09.09 | 3,4-Dihydroxy-2-Butanone Kinase                 | At3g17770 | Dihydroxyacetone Kinase Family Protein                                                             |
| OAJNBa0031O09.11 | Phytochrome A                                   | At1g09570 | PHYA (PHYTOCHROME A); G-Protein Coupled Photoreceptor/ Signal Transducer                           |
| OAJNBa0031O09.12 | Putative Peptide Transporter Protein            | At2g02040 | ATPTR2-B (NITRATE TRANSPORTER 1); Transporter                                                      |
| OJ000126_13.4    | Unknown Protein                                 | At2g27460 | Sec23/Sec24 Transport Family Protein                                                               |
| OJ000126_13.7    | Unknown Protein                                 | At3g52600 | ATCWINV2 (ARABIDOPSIS THALIANA CELL WALL INVERTASE 2); Hydrolase, Hydrolyzing O-Glycosyl Compounds |
| OJ000126_13.8    | Unknown Protein                                 | At2g36190 | ATCWINV4 (ARABIDOPSIS THALIANA CELL WALL INVERTASE 4); Hydrolase, Hydrolyzing O-Glycosyl Compounds |
| OJ000223_09.14   | Unknown Protein                                 | At3g25980 | Mitotic Spindle Checkpoint Protein, Putative (MAD2)                                                |
| OJ000223_09.15   | Unknown Protein                                 | At1g13440 | Gapc-2                                                                                             |
| OJ000315_02.20   | Unknown Protein                                 | At5g47860 | Hypothetical Protein                                                                               |
| OJ1001_C01.113   | Putative GDP Dissociation Inhibitor             | At2g44100 | ATGDI1 (Arabidopsis Thaliana Guanosine Diphosphate Dissociation Inhibitor 1)                       |
| OJ1001_D02.29    | Putative Actin-Depolymerizing Factor            | At1g01750 | Actin-Depolymerizing Factor, Putative                                                              |
| OJ1001_D02.30    | Pentatricopeptide (PPR) Repeat-Containing       | At5g39350 | Pentatricopeptide (PPR) Repeat-Containing Protein                                                  |
| OJ1001_D02.31    | Putative Anthranilate Phosphoribosyltransferase | At3g57880 | C2 Domain-Containing Protein                                                                       |
| OJ1001_G01.3     | Putative Transmembrane Protein                  | At5g12130 | Pde149 (Pigment Defective 149)                                                                     |
| OJ1001_G09.14    | Cwifj / Zinc Finger(CCCH-Type)-Like Protein     | At5g56900 | Cwifj-Like Family Protein / Zinc Finger (CCCH-Type) Family Protein                                 |
| OJ1003_A09.25    | Unknown Protein                                 | At4g31330 | Unknown Protein                                                                                    |
| OJ1003_B06.7     | Carboxyl-Terminal Proteinase-Like               | At4g17510 | Ubiquitin Carboxyl-Terminal Hydrolase, Putative / Ubiquitin Thiolesterase, Putative                |
| OJ1003_C06.106   | Putative Esterase                               | At5g23530 | Atcxe18 (Arabidopsis Thaliana Carboxyesterase 18)                                                  |
| OJ1003_E05.12    | Unknown Protein                                 | At4g28430 | Reticulon Family Protein                                                                           |
| OJ1003_F04.28    | Ubiquitin-Associated (UBA)/TS-N                 | At1g04850 | Ubiquitin-Associated (UBA)/TS-N Domain-Containing Protein                                          |

|                 |                                                 |           |                                                                                                             |
|-----------------|-------------------------------------------------|-----------|-------------------------------------------------------------------------------------------------------------|
| OJ1003_F04.33   | Kelch Repeat-Containing F-Box Protein-Like      | At1g67480 | Kelch Repeat-Containing F-Box Family Protein                                                                |
| OJ1003_F05.11   | Putative Flavonoid Glucosyl-Transferase         | At2g36750 | UGT72C1 (UDP-Glucosyl Transferase 72C1); UDP-Glycosyltransferase/ Transferase, Transferring Glycosyl Groups |
| OJ1003_H02.125  | Putative RSH, Disease Resistance-Related        | At1g54130 | RSH3 (RELA/SPOT HOMOLOG 3); Catalytic                                                                       |
| OJ1003C07.7     | Putative Myo-Inositol-1-Phosphate Synthase      | At2g22240 | Inositol-3-Phosphate Synthase Isozyme 2 / Myo-Inositol-1-Phosphate Synthase 2 / MI-1-P Synthase 2 / IPS 2   |
| OJ1004_A05.11   | Putative Eukaryotic Initiation Factor (Iso)4F   | At5g57870 | Eukaryotic Translation Initiation Factor 4F, Putative / Eif-4F, Putative                                    |
| OJ1004_A05.21   | Unknown Protein                                 | At1g80860 | N-Methyltransferase                                                                                         |
| OJ1004_A05.35   | Putative Emperature Stress-Induced Lipocalin    | At5g58070 | Lipocalin, Putative                                                                                         |
| OJ1004_A05.37   | Putative Calcium Binding Atopy-Related          | At4g32060 | Calcium-Binding EF Hand Family Protein                                                                      |
| OJ1004_A05.39   | Leucine-Rich Repeat-Like Protein                | At1g15740 | Leucine-Rich Repeat Family Protein                                                                          |
| OJ1004_A05.41   | Meprin And TRAF Homology Domain-Containing      | At2g25320 | Unknown Protein                                                                                             |
| OJ1004_A11.24   | Unknown Protein                                 | At5g42920 | Hypothetical Protein                                                                                        |
| OJ1004_A11.25   | Lipase Class 3-Like                             | At5g67050 | Lipase Class 3 Family Protein                                                                               |
| OJ1004_A11.27   | Putative Flavonol Synthase                      | At5g08640 | Fls (Flavonol Synthase)                                                                                     |
| OJ1004_E02.7    | Unknown Protein                                 | At1g77350 | Unknown Protein                                                                                             |
| OJ1004_E02.9    | Putative 60S Ribosomal Protein L24              | At2g36620 | RPL24A (RIBOSOMAL PROTEIN L24); Structural Constituent Of Ribosome                                          |
| OJ1004_E04.17   | Unknown Protein                                 | At5g14390 | Unknown Protein                                                                                             |
| OJ1004_E04.32   | Putative Minichromosome Maintenance Deficient   | At2g07690 | Minichromosome Maintenance Family Protein / MCM Family Protein                                              |
| OJ1004_E04.34   | Putative Aspartate Transaminase                 | At5g19550 | Asp2 (Aspartate Aminotransferase 2)                                                                         |
| OJ1004_F02.11   | Putative Membrane Protein                       | At1g51340 | MATE Efflux Family Protein                                                                                  |
| OJ1004_H01.22   | Putative Transmembrane Protein TM9SF3 (66.6 Kd) | At1g10950 | Endomembrane Protein 70, Putative                                                                           |
| OJ1004C08.10    | Hypothetical Protein                            | At4g35760 | Electron Carrier/ Protein Disulfide Oxidoreductase                                                          |
| OJ1004C08.14    | Putative Ubiquitin Protein                      | At2g17190 | Ubiquitin Family Protein                                                                                    |
| OJ1004C08.15    | Putative Catalase                               | At4g35090 | CAT2 (CATALASE 2); Catalase                                                                                 |
| OJ1004C08.17    | Putative Protein Kinase                         | At2g17220 | Protein Kinase, Putative                                                                                    |
| OJ1004C08.18    | Putative Protein Kinase                         | At1g20650 | Protein Kinase                                                                                              |
| OJ1004C08.6     | Putative AMP-Binding Protein                    | At1g20510 | OPCL1 (OPC-8:0 COA LIGASE1); 4-Coumarate-Coa Ligase                                                         |
| OJ1005_B05.29-1 | Succinate Dehydrogenase Iron-Protein Subunit    | At5g40650 | SDH2-2 (Succinate Dehydrogenase 2-2)                                                                        |
| OJ1005_B11.10   | Putative Protein Kinase                         | At3g23310 | Protein Kinase, Putative                                                                                    |
| OJ1005_B11.7    | Putative Glucosyltransferase                    | At4g07960 | ATCSLC12 (Cellulose Synthase-Like C12); Transferase, Transferring Glycosyl Groups                           |
| OJ1005_D12.17   | Putative Glucose-6-Phosphate Isomerase          | At4g24620 | Pgi1 (Chloroplastic Phosphoglucose Isomerase)                                                               |
| OJ1005_D12.35   | Unknown Protein                                 | At4g33590 | Hypothetical Protein                                                                                        |
| OJ1005_D12.36-1 | Putative Calcium-Dependent Protein Kinase       | At1g12680 | PEPKR2 (PHOSPHOENOLPYRUVATE CARBOXYLASE-RELATED KINASE 2); Kinase                                           |
| OJ1005_D12.36-2 | Putative Calcium-Dependent Protein Kinase       | At5g12180 | CPK17 (Calcium-Dependent Protein Kinase 17); Calcium- And Calmodulin-Dependent Protein Kinase/ Kinase       |

|                 |                                                 |           |                                                                                                            |
|-----------------|-------------------------------------------------|-----------|------------------------------------------------------------------------------------------------------------|
| OJ1005_D12.38   | Putative Succinoaminoimidazolecarboximide       | At3g21110 | PUR7 (Purin 7); Phosphoribosylaminoimidazolesuccinocarboxamide Synthase                                    |
| OJ1005_E12.1    | Putative Nascent Polypeptide Associated Complex | At3g12390 | Nascent Polypeptide Associated Complex Alpha Chain Protein, Putative / Alpha-NAC, Putative                 |
| OJ1005_H01.19   | Putative Pectinesterase                         | At5g53370 | Pectinesterase Family Protein                                                                              |
| OJ1006_A02.12-1 | PDR-Like ABC Transporter                        | At1g15520 | ATPDR12/PDR12 (PLEIOTROPIC DRUG RESISTANCE 12); Atpase, Coupled To Transmembrane Movement Of Substances    |
| OJ1006_A02.22   | Putative Golgi-Associated Particle 102K Chain   | At1g52360 | Coatomer Protein Complex, Subunit Beta 2 (Beta Prime), Putative                                            |
| OJ1006_A02.24   | Putative Coatomer Protein Complex, Subunit Beta | At3g15980 | Coatomer Protein Complex, Subunit Beta 2 (Beta Prime), Putative                                            |
| OJ1006_A02.42   | Putative Protein Kinase Xa21                    | At3g47090 | Leucine-Rich Repeat Transmembrane Protein Kinase, Putative                                                 |
| OJ1006_A02.6    | Putative Plastidic ATP/ADP Transporter          | At1g80300 | Chloroplast ADP, ATP Carrier Protein 1 / ADP, ATP Translocase 1 / Adenine Nucleotide Translocase 1 (AATP1) |
| OJ1006_D05.16   | Putative Pectate Lyase Precursor                | At1g14420 | AT59 (Arabidopsis Homolog Of Tomato LAT59); Lyase/ Pectate Lyase                                           |
| OJ1006_D05.27-2 | Putative Histone Deacetylase HDAC3              | At4g38130 | Hd1 (Histone Deacetylase 19, Histone Deacetylase19)                                                        |
| OJ1006_D05.35   | Putative Protein Kinase Xa21                    | At3g47580 | Leucine-Rich Repeat Transmembrane Protein Kinase, Putative                                                 |
| OJ1006F06.12    | Putative ATP Phosphoribosyl Transferase         | At1g58080 | Atatp-Prt1 (Atp Phosphoribosyl Transferase)                                                                |
| OJ1006F06.19    | Unknown Protein                                 | At1g21880 | Peptidoglycan-Binding Lysm Domain-Containing Protein                                                       |
| OJ1006F06.4     | Putative F-Box Protein                          | At2g17020 | F-Box Family Protein (FBL10)                                                                               |
| OJ1006F06.5     | Putative Glutathione S-Transferase              | At3g03190 | ATGSTF11 (GLUTATHIONE S-TRANSFERASE F11); Glutathione Transferase                                          |
| OJ1006F06.7     | Putative Glutathione S-Transferase              | At2g47730 | ATGSTF8 (GLUTATHIONE S-TRANSFERASE 8); Glutathione Transferase                                             |
| OJ1007_D04.17   | Putative Anthranilate Phosphoribosyltransferase | At1g70570 | Anthranilate Phosphoribosyltransferase, Putative                                                           |
| OJ1007_D04.18   | Putative ATP Synthase                           | At2g21870 | Unknown Protein                                                                                            |
| OJ1007_D04.3    | Putative Polygalacturonase                      | At1g23460 | Polygalacturonase                                                                                          |
| OJ1008_C03.10   | Putative Translational Initiation Factor Eif-4A | At3g13920 | EIF4A1 (Eukaryotic Translation Initiation Factor 4A-1)                                                     |
| OJ1008_D06.10   | Putative S-Adenosyl-L-Methionine:Salicylic Acid | At5g66430 | S-Adenosyl-L-Methionine:Carboxyl Methyltransferase Family Protein                                          |
| OJ1008_D06.15   | Putative Microtubule-Associated Protein         | At5g55230 | ATMAP65-1 (MICROTUBULE-ASSOCIATED PROTEINS 65-1); Microtubule Binding                                      |
| OJ1008_E02.21   | Putative SEC14 Cytosolic Factor                 | At1g19650 | SEC14 Cytosolic Factor, Putative / Phosphoglyceride Transfer Protein, Putative                             |
| OJ1008_E02.6    | Putative Diaminopimelate Decarboxylase          | At3g14390 | Diaminopimelate Decarboxylase, Putative / DAP Carboxylase, Putative                                        |
| OJ1008_F08.11   | Dehydrogenase-Like Protein                      | At5g10730 | Catalytic/ Coenzyme Binding                                                                                |
| OJ1008_F08.14   | Unknown Protein                                 | At4g21640 | Subtilase Family Protein                                                                                   |
| OJ1008_F08.16   | Ranbpm-Like                                     | At1g35470 | Spla/Ryanodine Receptor (SPRY) Domain-Containing Protein                                                   |
| OJ1012B02.1     | Unknown Protein                                 | At3g19260 | Lag1 Homolog 2 (Longevity Assurance Gene1 Homolog 2)                                                       |
| OJ1012B02.12    | Unknown Protein                                 | At2g39970 | Peroxisomal Membrane Protein (PMP36)                                                                       |
| OJ1012B02.4     | Putative Anthranilate Synthase Alpha 2 Subunit  | At2g29690 | ASA2 (Anthranilate Synthase 2); Anthranilate Synthase                                                      |
| OJ1014_C08.12   | Putative Trnahis Guanylyltransferase            | At2g31580 | Unknown Protein                                                                                            |
| OJ1014_E02.13   | Unknown Protein                                 | At5g49410 | Unknown Protein                                                                                            |
| OJ1014_E09.29   | Putative Pyruvate Kinase Isozyme A, Chloroplast | At3g22960 | Pyruvate Kinase, Putative                                                                                  |
| OJ1014_E09.9    | Bifunctional Phosphopantetheine Adenylyl        | At2g18250 | ATCOAD (4-PHOSPHOPANTHETHEINE ADENYLYLTRANSFERASE); Nucleotidyltransferase/                                |



|                  |                                                               |           |                                                                                                                  |
|------------------|---------------------------------------------------------------|-----------|------------------------------------------------------------------------------------------------------------------|
| OJ1014_G12.22    | Unknown Protein                                               | At2g26690 | Pantetheine-Phosphate Adenylyltransferase                                                                        |
| OJ1014_G12.25    | Unknown Protein                                               | At2g23610 | Nitrate Transporter (NTP2)                                                                                       |
| OJ1014_G12.30    | Putative Ca <sup>2+</sup> /H <sup>+</sup> -Exchanging Protein | At3g51860 | Esterase, Putative                                                                                               |
| OJ1014_H03.11    | Putative Anther-Specific Proline-Rich Protein                 | At5g33370 | CAX3 (Cation Exchanger 3); Cation:Cation Antiporter                                                              |
| OJ1014_H03.14    | Putative Polyribonucleotide                                   | At5g14580 | GDSL-Motif Lipase/Hydrolase Family Protein                                                                       |
| OJ1015F07.11     | Putative NAM-Like Protein                                     | At4g36160 | Polyribonucleotide Nucleotidyltransferase, Putative                                                              |
| OJ1015F07.14     | Putative Protein Kinase                                       | At1g12460 | ANAC076/VND2 (Arabidopsis NAC Domain Containing Protein 76, VASCULAR-RELATED NAC-DOMAIN 2); Transcription Factor |
| OJ1015F07.2      | Putative Phosphoribosylanthranilate Transferase               | At5g17990 | Leucine-Rich Repeat Transmembrane Protein Kinase, Putative                                                       |
| OJ1015F07.8      | Putative Serine/Threonine Kinase                              | At1g01140 | TRP1 (TRYPTOPHAN BIOSYNTHESIS 1); Anthranilate Phosphoribosyltransferase                                         |
| OJ1017C11.7      | Putative Squalene Monooxygenase                               | At1g58440 | CIPK9 (CBL-INTERACTING PROTEIN KINASE 9); Kinase                                                                 |
| OJ1019_E02.23    | Putative Lectin-Like Protein Kinase                           | At5g10530 | XF1; Oxidoreductase                                                                                              |
| OJ1019_E02.25    | Putative Insulin Degrading Enzyme                             | At2g41790 | Lectin Protein Kinase, Putative                                                                                  |
| OJ1019_E02.4     | Floral Organ Regulator 2                                      | At5g06870 | Peptidase M16 Family Protein / Insulinase Family Protein                                                         |
| OJ1020_C02.24    | Putative Pentatricopeptide (PPR)                              | At1g02060 | PGIP2 (POLYGALACTURONASE INHIBITING PROTEIN 2); Protein Binding                                                  |
| OJ1020_C02.26    | Putative P18                                                  | At2g45640 | Pentatricopeptide (PPR) Repeat-Containing Protein                                                                |
| OJ1027_G06.13    | Putative ERD4 Protein                                         | At1g30360 | SAP18 (SIN3 ASSOCIATED POLYPEPTIDE P18); Protein Binding / Transcription Regulator                               |
| OJ1027_G06.21    | Unknown Protein                                               | At1g17210 | Erd4 (Early-Responsive To Dehydration 4)                                                                         |
| OJ1027_G06.25    | Putative CBL-Interacting Protein Kinase 23                    | At1g30270 | Zinc Ion Binding                                                                                                 |
| OJ1029_F04.24    | Putative PRLI-Interacting Factor K                            | At4g15420 | CIPK23 (CBL-INTERACTING PROTEIN KINASE 23); Kinase                                                               |
| OJ1031_C12.26    | Putative Kinetochores Protein                                 | At1g75950 | PRLI-Interacting Factor K                                                                                        |
| OJ1041F02.16     | Putative Male Fertility Protein [Zea Mays]                    | At3g59530 | SKP1 (ARABIDOPSIS SKP1 HOMOLOGUE); Ubiquitin-Protein Ligase                                                      |
| OJ1046_F07.17-1  | Putative Alpha,Alpha-Trehalose-Phosphate                      | At2g18700 | Strictosidine Synthase Family Protein                                                                            |
| OJ1046_F07.26    | Putative Receptor-Like Kinase Xa21-Binding                    | At5g07270 | ATTPS11 (Arabidopsis Thaliana Trehalose Phosphatase/Synthase 11); Transferase, Transferring Glycosyl Groups      |
| OJ1046_F10.128-2 | Putative DNA-Dependent Protein Kinase 70 Kda                  | At1g16970 | Ankyrin Repeat Family Protein                                                                                    |
| OJ1046_F10.129-1 | Putative Mitogen Activated Protein Kinase                     | At3g04910 | ATKU70/KU70 (Arabidopsis Thaliana Ku70 Homolog); Double-Stranded DNA Binding / Protein Binding                   |
| OJ1047_A06.117   | Plasma Membrane Intrinsic Protein                             | At3g54820 | WNK1 (WITH NO LYSINE (K) 1); Kinase                                                                              |
| OJ1047_A06.130   | Putative 60S Ribosomal Protein L44                            | At4g14320 | PIP2;5/PIP2D (Plasma Membrane Intrinsic Protein 2;5); Water Channel                                              |
| OJ1047_C01.10    | Arm Repeat-Containing Protein-Like Protein                    | At3g01400 | 60S Ribosomal Protein L36a/L44 (RPL36aB)                                                                         |
| OJ1047_C01.14    | Putative Interferon-Related Protein                           | At1g27760 | Armadillo/Beta-Catenin Repeat Family Protein                                                                     |
| OJ1047_C01.4     | Hypothetical Protein                                          | At1g75110 | Interferon-Related Developmental Regulator Family Protein / IFRD Protein Family                                  |
| OJ1047_C01.8     | Putative Eukaryotic Peptide Chain Release Factor              | At3g26618 | Rra2 (Reduced Residual Arabinose 2)                                                                              |
| OJ1048_C10.5     | Putative Proton Myo-Inositol Transporter                      | At1g30220 | ERF1-3 (EUKARYOTIC RELEASE FACTOR 1-3); Translation Release Factor                                               |
|                  |                                                               |           | ATINT2 (INOSITOL TRANSPORTER 2); Carbohydrate Transporter/ Sugar Porter                                          |

|                  |                                                 |           |                                                                                                                                                    |
|------------------|-------------------------------------------------|-----------|----------------------------------------------------------------------------------------------------------------------------------------------------|
| OJ1048_C10.6     | Putative MAGE                                   | At1g34770 | MAGE-8 Antigen-Related                                                                                                                             |
| OJ1057_E05.110   | Putative Nramp1 Protein                         | At1g80830 | NRAMP1 (NRAMP Metal Ion Transporter 1); Manganese Ion Transporter/ Metal Ion Transporter                                                           |
| OJ1058_A12.123   | Serine/Threonine Kinase Receptor Precursor-Like | At4g23280 | Protein Kinase, Putative                                                                                                                           |
| OJ1058_A12.126   | Serine/Threonine Kinase Receptor Precursor-Like | At4g23180 | CRK10 (CYSTEINE-RICH RLK10); Kinase                                                                                                                |
| OJ1058_A12.128-2 | Contains EST(S): D22146(C10415)                 | At4g04500 | Protein Kinase Family Protein                                                                                                                      |
| OJ1058_B11.118   | Unknown Protein                                 | At5g51150 | Unknown Protein                                                                                                                                    |
| OJ1058_C08.10    | Putative Polygalacturonase                      | At4g23500 | Glycoside Hydrolase Family 28 Protein / Polygalacturonase (Pectinase) Family Protein                                                               |
| OJ1058_F05.4     | Unknown Protein                                 | At1g43130 | Lcv2 (Like Cov 2)                                                                                                                                  |
| OJ1058_F05.5     | Putative Polypyrimidine Track-Binding Protein   | At1g43190 | Polypyrimidine Tract-Binding Protein, Putative / Heterogeneous Nuclear Ribonucleoprotein, Putative                                                 |
| OJ1058_F07.19    | Putative Class IV Chitinase (CHIV)              | At3g54420 | ATEP3 (Arabidopsis Thaliana Chitinase Class IV); Chitinase                                                                                         |
| OJ1058_F07.22    | Putative Eukaryotic Translation Initiation      | At1g73180 | Eukaryotic Translation Initiation Factor-Related                                                                                                   |
| OJ1060_D03.125   | Amino Acid Acetyltransferase(N-Acetylglutamate  | At2g22910 | GCN5-Related N-Acetyltransferase (GNAT) Family Protein / Amino Acid Kinase Family Protein                                                          |
| OJ1063_D06.13    | Putative DNA-Binding Protein                    | At3g61260 | DNA-Binding Family Protein / Remorin Family Protein                                                                                                |
| OJ1063_D06.15    | Putative Vacuolar ATP Synthase Subunit F        | At4g02620 | (VACUOLAR ATPASE SUBUNIT F); Hydrogen Ion Transporting ATP Synthase, Rotational Mechanism / Hydrogen Ion Transporting Atpase, Rotational Mechanism |
| OJ1065_B06.1     | Unknown Protein                                 | At2g44260 | Unknown Protein                                                                                                                                    |
| OJ1065_B06.19-1  | Putative Photosystem I Antenna Protein          | At3g61470 | LHCA2 (Photosystem I Light Harvesting Complex Gene 2); Chlorophyll Binding                                                                         |
| OJ1065_B06.2     | Putative Tocopherol Polyprenyltransferase       | At3g11950 | ATHST; Prenyltransferase                                                                                                                           |
| OJ1065_B06.20    | Putative Succinyl-Coa Ligase Alpha Subunit      | At5g23250 | Succinyl-Coa Ligase (GDP-Forming) Alpha-Chain / Succinyl-Coa Synthetase, Alpha Chain, Putative / SCS-Alpha, Putative                               |
| OJ1067_B01.11    | Putative Phosphate Transporter 2-1              | At5g50180 | Protein Kinase, Putative                                                                                                                           |
| OJ1073_F05.25-1  | Glycerophosphoryl Diester Phosphodiesterase 2   | At5g58170 | Glycerophosphoryl Diester Phosphodiesterase Family Protein                                                                                         |
| OJ1077_A12.15    | Putative Aspartate Transaminase                 | At2g30970 | Asp1 (Aspartate Aminotransferase 1)                                                                                                                |
| OJ1077_A12.16    | Putative SERK1 Protein                          | At1g60800 | NIK3 (NSP-INTERACTING KINASE 3); Kinase                                                                                                            |
| OJ1077_A12.17    | Putative Shaggy-Related Protein Kinase Dzeta    | At2g30980 | Shaggy-Related Protein Kinase Delta / ASK-Delta / ASK-Dzeta (ASK4)                                                                                 |
| OJ1077_A12.6     | Ribosomal Protein L11-Like                      | At4g18730 | RPL16B (Ribosomal Protein L16B); Structural Constituent Of Ribosome                                                                                |
| OJ1077_E05.10    | Putative Vacuolar Proton-Atpase                 | At1g78900 | VHA-A; ATP Binding / Hydrogen Ion Transporting ATP Synthase, Rotational Mechanism                                                                  |
| OJ1079_F11.25-2  | Pentatricopeptide (PPR) Repeat-Containing       | At1g05750 | PDE247 (PIGMENT DEFECTIVE 247); Binding                                                                                                            |
| OJ1079_F11.26    | Beta 1 Subunit Of 20S Proteasome                | At4g31300 | PBA1 (20S Proteasome Beta Subunit A 1); Peptidase                                                                                                  |
| OJ1079_F11.27    | Putative HYS1                                   | At5g64930 | Cpr5 (Constitutive Expression Of Pr Genes 5)                                                                                                       |
| OJ1081_B12.106-3 | P53 Binding Protein-Like                        | At1g67320 | DNA Primase, Large Subunit Family                                                                                                                  |
| OJ1081D05.10     | Unknown Protein                                 | At2g01910 | Atmap65-6                                                                                                                                          |
| OJ1081D05.5      | Putative NADPH-Dependent Oxidoreductase         | At1g59950 | Aldo/Keto Reductase, Putative                                                                                                                      |
| OJ1092_A07.116   | Cytochrome C6, Chloroplast Precursor-Like       | At5g45040 | Cytochrome C6 (ATC6)                                                                                                                               |
| OJ1092_A07.123   | Unknown Protein                                 | At1g10180 | Unknown Protein                                                                                                                                    |

|                  |                                                 |           |                                                                                                                |
|------------------|-------------------------------------------------|-----------|----------------------------------------------------------------------------------------------------------------|
| OJ1092_A07.132   | Putative Calcium-Dependent Protein Kinase       | At5g19450 | CDPK19 (CALCIUM-DEPENDENT PROTEIN KINASE 19); Calcium- And Calmodulin-Dependent Protein Kinase/ Kinase         |
| OJ1097_A12.2     | 20S Proteasome Beta Subunit                     | At5g40580 | PBB2 (20S Proteasome Beta Subunit B 2); Peptidase                                                              |
| OJ1111_B11.20    | Putative Protein Kinase                         | At5g59010 | ATP Binding / Binding / Protein Kinase                                                                         |
| OJ1111_C07.25    | Putative Serine Palmitoyltransferase LCB1       | At4g36480 | ATLCB1 (ARABIDOPSIS THALIANA SPHINGOLIPID LONGCHAIN BASE 1); Serine C-Palmitoyltransferase                     |
| OJ1111_C07.26    | Putative Phosphoenolpyruvate Carboxylase Kinase | At1g08650 | PPCK1 (PHOSPHOENOLPYRUVATE CARBOXYLASE KINASE); Kinase                                                         |
| OJ1111_E05.24    | Putative Latex Protein Allergen                 | At2g26560 | PLP2 (PHOSPHOLIPASE A 2A); Nutrient Reservoir                                                                  |
| OJ1111_E07.25    | Putative Gamma-Tocopherol Methyltransferase     | At1g64970 | G-Tmt (Gamma-Tocopherol Methyltransferase)                                                                     |
| OJ1111_H02.12    | Putative Blue Copper Protein Precursor          | At3g60280 | UCC3 (UCLACYANIN 3); Copper Ion Binding                                                                        |
| OJ1112_E08.105   | Putative Betanidin 6-O-Glucosyltransferase      | At4g15280 | UDP-Glucuronosyl/UDP-Glucosyl Transferase Family Protein                                                       |
| OJ1112_E08.119   | Guanine Nucleotide-Exchange Protein-Like        | At3g43300 | ATMIN7 (ARABIDOPSIS THALIANA HOPM INTERACTOR 7); Guanyl-Nucleotide Exchange Factor/ Protein Binding            |
| OJ1112_F06.15    | Zinc Finger And C2 Domain Protein-Like          | At1g48590 | C2 Domain-Containing Protein                                                                                   |
| OJ1112_F06.16    | Receptor-Like Protein Kinase-Like Protein       | At1g28340 | Leucine-Rich Repeat Family Protein                                                                             |
| OJ1112_G03.18    | Unknown Protein                                 | At5g23850 | Unknown Protein                                                                                                |
| OJ1112_G03.6-1   | Putative RNA Helicase                           | At4g00660 | DEAD/DEAH Box Helicase, Putative                                                                               |
| OJ1112_G06.34    | Ankyrin Repeat Protein-Like                     | At3g04470 | Unknown Protein                                                                                                |
| OJ1112_G07.12    | Putative Rar1                                   | At5g51700 | Pbs2 (Pphb Susceptible 2)                                                                                      |
| OJ1112_G07.32    | Unknown Protein                                 | At5g06270 | Unknown Protein                                                                                                |
| OJ1112_G07.8     | Chaperone Protein Dnaj-Related-Like             | At5g61670 | Encodes A Close Homolog Of The Cauliflower OR (Orange) Protein                                                 |
| OJ1113_E01.101   | NADH-Ubiquinone Oxidoreductase 18 Kda Subunit,  | At5g67590 | Fro1 (Frostbite1)                                                                                              |
| OJ1113_E01.105-1 | Putative Early Nodulin 8 Precursor              | At3g26430 | GDSL-Motif Lipase/Hydrolase Family Protein                                                                     |
| OJ1115_A05.12-1  | Putative RCH2 Protein                           | At3g21670 | Nitrate Transporter (NTP3)                                                                                     |
| OJ1115_A05.19    | Putative ASC1                                   | At1g13580 | Lag13 (Lag1 Longevity Assurance Homolog 3)                                                                     |
| OJ1115_A07.5     | Putative Sucrose-Phosphate Synthase 1           | At5g20280 | ATSPS1F (Sucrose Phosphate Synthase 1F); Sucrose-Phosphate Synthase/ Transferase, Transferring Glycosyl Groups |
| OJ1115_B01.11    | Putative Cytochrome P450                        | At3g26300 | CYP71B34 (Cytochrome P450, Family 71, Subfamily B, Polypeptide 34); Oxygen Binding                             |
| OJ1115_B01.19    | Putative Cytochrome P450                        | At3g26210 | CYP71B23 (Cytochrome P450, Family 71, Subfamily B, Polypeptide 23); Oxygen Binding                             |
| OJ1115_B01.25    | Putative Zipa                                   | At4g32190 | Centromeric Protein-Related                                                                                    |
| OJ1115_B01.27    | Receptor Protein Kinase PERK1-Like Protein      | At3g15890 | Protein Kinase Family Protein                                                                                  |
| OJ1115_B01.31    | Putative Cytochrome P450                        | At3g26310 | CYP71B35 (Cytochrome P450, Family 71, Subfamily B, Polypeptide 35); Oxygen Binding                             |
| OJ1115_D03.25    | Putative GTP-Binding Protein Typa               | At5g13650 | Elongation Factor Family Protein                                                                               |
| OJ1115_D03.30    | Lipase Class 3-Like                             | At2g05260 | Lipase Class 3 Family Protein                                                                                  |
| OJ1115_D04.1     | Unknown Protein                                 | At1g12790 | Unknown Protein                                                                                                |
| OJ1115_D04.2     | Putative Receptor Protein Kinase                | At3g08680 | Leucine-Rich Repeat Transmembrane Protein Kinase, Putative                                                     |
| OJ1115_D04.4     | Putative AAA-Type Atpase                        | At5g17760 | AAA-Type Atpase Family Protein                                                                                 |

|                 |                                                 |           |                                                                                                                  |
|-----------------|-------------------------------------------------|-----------|------------------------------------------------------------------------------------------------------------------|
| OJ1115_D04.5    | Putative AAA-Type Atpase                        | At3g50930 | AAA-Type Atpase Family Protein                                                                                   |
| OJ1116_A06.10   | Putative Pentatricopeptide (PPR)                | At2g35130 | Pentatricopeptide (PPR) Repeat-Containing Protein                                                                |
| OJ1116_C12.15   | Putative Nonspecific Lipid Transfer Protein     | At5g59320 | LTP3 (LIPID TRANSFER PROTEIN 3); Lipid Binding                                                                   |
| OJ1116_E03.25-2 | Putative HGA1                                   | At1g03900 | Atnap4 (Arabidopsis Thaliana Non-Intrinsic Abc Protein 4)                                                        |
| OJ1116_E04.6    | Putative Gtpase Activating Protein              | At5g54780 | RAB Gtpase Activator                                                                                             |
| OJ1116_H09.4    | Putative Potassium Channel                      | At5g46370 | KCO2 (CA2+ ACTIVATED OUTWARD RECTIFYING K+ CHANNEL 2); Calcium Ion Binding / Outward Rectifier Potassium Channel |
| OJ1116_H09.9    | Putative Multidrug Resistance Protein 1 Homolog | At1g02520 | PGP11 (P-GLYCOPROTEIN 11); Atpase, Coupled To Transmembrane Movement Of Substances                               |
| OJ1117_F10.11   | Putative Subtilisin-Like Proteinase             | At3g14240 | Subtilase Family Protein                                                                                         |
| OJ1118_A06.10   | F-Box Protein Family-Like                       | At1g55590 | F-Box Family Protein                                                                                             |
| OJ1118_A06.15   | Putative Protein Phosphatase 2C                 | At1g16220 | Protein Phosphatase 2C Family Protein / PP2C Family Protein                                                      |
| OJ1118_A06.9    | Putative Drought-Inducible Protein 1OS          | At1g80150 | Pentatricopeptide (PPR) Repeat-Containing Protein                                                                |
| OJ1118_A10.25   | Putative Trna Splicing Protein                  | At5g65720 | Atnfs1/Nifs1 (Arabidopsis Thaliana Nitrogen Fixation S Homolog 1)                                                |
| OJ1118_A10.27   | Putative Delta-6-Desaturase                     | At2g46210 | Delta-8 Sphingolipid Desaturase, Putative                                                                        |
| OJ1118_B06.10   | Putative Peroxidase                             | At2g22420 | Peroxidase 17 (PER17) (P17)                                                                                      |
| OJ1118_C04.3    | Putative Latex-Abundant Protein                 | At1g79330 | AMC6/ATMCP2B (TYPE-II METACASPASES); Caspase/ Cysteine-Type Endopeptidase                                        |
| OJ1118_C04.7    | Putative SMC Protein                            | At5g48600 | ATSMC3 (Arabidopsis Thaliana Structural Maintenance Of Chromosome 3); ATP Binding                                |
| OJ1118_D07.26-1 | Putative Amino Acid Permease                    | At5g49630 | AAP6 (AMINO ACID PERMEASE 6); Amino Acid Permease                                                                |
| OJ1118_D07.29   | Putative Oslrk1(Receptor-Type Protein Kinase)   | At5g65700 | BAM1 (Big Apical Meristem 1); ATP Binding / Kinase/ Protein Serine/Threonine Kinase                              |
| OJ1118_F05.12   | Unknown Protein                                 | At1g15980 | Hypothetical Protein                                                                                             |
| OJ1119_A01.20-1 | Putative Phosphatidylinositol-4-Phosphate       | At3g09920 | PIP5K9 (PHOSPHATIDYL INOSITOL MONOPHOSPHATE 5 KINASE); 1-Phosphatidylinositol-4-Phosphate 5-Kinase               |
| OJ1119_A01.21-1 | Putative 50S Ribosomal Protein L9, Chloroplast  | At3g44890 | RPL9 (Ribosomal Protein L9); Structural Constituent Of Ribosome                                                  |
| OJ1119_B04.18   | Putative Hexose Transporter                     | At5g26250 | Sugar Transporter, Putative                                                                                      |
| OJ1119_B04.19-1 | Cycloartenol-C24-Methyltransferase              | At5g13710 | Smt1 (Sterol Methyltransferase 1)                                                                                |
| OJ1119_B04.25   | Putative LRR Receptor-Like Kinase 2             | At2g41820 | Leucine-Rich Repeat Transmembrane Protein Kinase, Putative                                                       |
| OJ1119_B04.4    | Putative DD1A Protein                           | At1g55360 | Unknown Protein                                                                                                  |
| OJ1119_B04.6    | Putative X-Prolyl Aminopeptidase                | At3g05350 | Aminopeptidase                                                                                                   |
| OJ1119_B10.28   | Putative Histone Deacetylase                    | At5g63110 | HDA6 (HISTONE DEACETYLASE 6); Histone Deacetylase                                                                |
| OJ1119_B10.31   | Light Induced Protein Like                      | At4g22310 | Unknown Protein                                                                                                  |
| OJ1119_C05.21-2 | Putative Aminoimidazolecarboximide              | At2g35040 | AICARFT/Impchase Bienzyme Family Protein                                                                         |
| OJ1119_D01.17-1 | Putative RNA Recognition Motif (RRM)-Containing | At5g06210 | RNA-Binding Protein, Putative                                                                                    |
| OJ1119_D01.19   | Putative Quinone-Oxidoreductase QR2             | At5g54500 | Fqr1 (Flavodoxin-Like Quinone Reductase 1)                                                                       |
| OJ1119_D01.22   | Putative Armadillo Repeat Containing Protein    | At4g21350 | B80; Binding / Ubiquitin-Protein Ligase                                                                          |
| OJ1119_D01.9    | Helix-Loop-Helix-Like Protein                   | At5g54680 | ILR3 (IAA-LEUCINE RESISTANT3); DNA Binding / Transcription Factor                                                |

|                |                                                  |           |                                                                                                   |
|----------------|--------------------------------------------------|-----------|---------------------------------------------------------------------------------------------------|
| OJ1120_C08.21  | Putative Vacuolar Protein Sorting Protein 18     | At1g12470 | Pep3/Vps18/Deep Orange Family Protein                                                             |
| OJ1121_A05.14  | Putative Vacuole Membrane Protein 1              | At1g05360 | Unknown Protein                                                                                   |
| OJ1121_A05.15  | Hypothetical Protein                             | At3g63170 | Unknown Protein                                                                                   |
| OJ1121_A05.16  | Putative Organic Cation Transporter              | At3g13050 | Transporter-Related                                                                               |
| OJ1123_C12.106 | Hypothetical Protein                             | At3g55950 | Protein Kinase Family Protein                                                                     |
| OJ1123_C12.123 | Calcineurin-Like Phosphoesterase Family-Like     | At1g13900 | Calcineurin-Like Phosphoesterase Family Protein                                                   |
| OJ1123_C12.124 | Putative Dimethylaniline Monooxygenase           | At5g61290 | Flavin-Containing Monooxygenase Family Protein / FMO Family Protein                               |
| OJ1123_E07.2   | GHMP Kinase-Like Protein                         | At4g16130 | ARA1 (ARABINOSE SENSITIVE 1); ATP Binding / Galactokinase                                         |
| OJ1123_G04.15  | Putative Anthocyanin Biosynthetic Gene Regulator | At5g24520 | TTG1 (TRANSPARENT TESTA GLABRA 1); Nucleotide Binding                                             |
| OJ1123_G04.6   | MADS Box Protein                                 | At2g45650 | AGL6 (AGAMOUS LIKE-6); DNA Binding / Transcription Factor                                         |
| OJ1123_G08.16  | Putative Clathrin Coat Assembly Protein AP17     | At2g19790 | Clathrin Adaptor Complex Small Chain Family Protein                                               |
| OJ1123_G09.21  | Hypothetical Protein                             | At5g19020 | Pentatricopeptide (PPR) Repeat-Containing Protein                                                 |
| OJ1123F12.7    | Putative Sugar Kinase                            | At1g06730 | Pfkb-Type Carbohydrate Kinase Family Protein                                                      |
| OJ1124_B05.20  | Putative Dihydrolipoamide Acetyltransferase      | At3g25860 | LTA2 (PLASTID E2 SUBUNIT OF PYRUVATE DECARBOXYLASE); Dihydrolipoalysine-Residue Acetyltransferase |
| OJ1124_B05.3   | Myosin-Like Protein                              | At1g55170 | Unknown Protein                                                                                   |
| OJ1124_B05.4   | Putative Osrad23                                 | At5g38470 | DNA Repair Protein RAD23, Putative                                                                |
| OJ1124_B05.7   | GF14-C Protein                                   | At3g02520 | GRF7 (General Regulatory Factor 7); Protein Phosphorylated Amino Acid Binding                     |
| OJ1124_B05.9   | Putative UVB-Resistance Protein UVR8             | At5g16040 | Regulator Of Chromosome Condensation (RCC1) Family Protein                                        |
| OJ1124_D06.10  | Hypothetical Protein                             | At3g19870 | Binding                                                                                           |
| OJ1124_D06.14  | Membrane-Associated Salt-Inducible Protein-Like  | At1g61870 | Pentatricopeptide (PPR) Repeat-Containing Protein                                                 |
| OJ1124_D06.17  | Pentatricopeptide Repeat-Containing              | At5g48910 | Pentatricopeptide (PPR) Repeat-Containing Protein                                                 |
| OJ1124_D06.18  | Oligopeptidase A-Like                            | At5g65620 | Peptidase M3 Family Protein / Thimet Oligopeptidase Family Protein                                |
| OJ1124_H03.12  | Hypothetical Protein                             | At1g05440 | Unknown Protein                                                                                   |
| OJ1124_H03.18  | Putative WD-Repeat Protein                       | At5g50230 | Nucleotide Binding                                                                                |
| OJ1124_H03.2   | Cysteine Synthase                                | At4g14880 | Oasa1 (O-Acetylserine (Thiol) Lyase (Oas-TI) Isoform A1)                                          |
| OJ1124_H03.28  | Putative Protein Kinase                          | At4g14780 | Protein Kinase, Putative                                                                          |
| OJ1124_H03.29  | Putative Receptor-Associated Protein             | At3g63310 | Glutamate Binding                                                                                 |
| OJ1124_H03.5   | Unknown Protein                                  | At4g17420 | Unknown Protein                                                                                   |
| OJ1126_B10.10  | Unknown Protein                                  | At3g27930 | Unknown Protein                                                                                   |
| OJ1126_B10.14  | Putative Cinnamoyl Coa Reductase                 | At5g14700 | Cinnamoyl-Coa Reductase-Related                                                                   |
| OJ1126_B10.4   | Unknown Protein                                  | At3g18570 | Glycine-Rich Protein / Oleosin                                                                    |
| OJ1126_B10.7   | Unknown Protein                                  | At1g26120 | Esterase-Related                                                                                  |
| OJ1126_B10.8   | 'Unknown Protein, Contains Calcium-Binding       | At1g18530 | Calmodulin, Putative                                                                              |
| OJ1126_B10.9   | Putative Protein Kinase                          | At5g50000 | Protein Kinase, Putative                                                                          |

|                  |                                                  |           |                                                                                              |
|------------------|--------------------------------------------------|-----------|----------------------------------------------------------------------------------------------|
| OJ1126_D01.10    | Putative Universal Stress Protein (USP)          | At3g53990 | Universal Stress Protein (USP) Family Protein                                                |
| OJ1126_D09.20-1  | Glycosyl Transferase-Like Protein                | At5g14480 | Glycosyl Transferase Family 17 Protein                                                       |
| OJ1126_D09.28    | Putative NAD-Dependent Isocitrate Dehydrogenase  | At4g35260 | IDH1 (ISOCITRATE DEHYDROGENASE 1); Isocitrate Dehydrogenase (NAD+)                           |
| OJ1126B12.12     | Putative Ubiquitin-Conjugating Enzyme            | At3g57870 | AHUS5 (EMBRYO DEFECTIVE 1637); Ubiquitin-Protein Ligase                                      |
| OJ1126B12.8      | Putative MADS Box-Like Protein                   | At4g22950 | AGL19 (AGAMOUS-LIKE 19); Transcription Factor                                                |
| OJ1127_B08.12    | Aspartic Proteinase                              | At1g11910 | Aspartyl Protease Family Protein                                                             |
| OJ1127_B08.2     | Putative Protein Kinase                          | At2g47060 | Kinase                                                                                       |
| OJ1127_B08.5     | Putative Protein Kinase                          | At3g17510 | CIPK1 (CBL-INTERACTING PROTEIN KINASE 1); Kinase                                             |
| OJ1127_E01.113   | Chitin-Inducible Gibberellin-Responsive Protein  | At5g48150 | PAT1 (PHYTOCHROME A SIGNAL TRANSDUCTION 1); Transcription Factor                             |
| OJ1127_E01.118   | Yippee-Like Protein                              | At5g53940 | Yippee Family Protein                                                                        |
| OJ1127_E01.120   | Serine/Threonine Protein Kinase PKPA-Like        | At5g55560 | Protein Kinase Family Protein                                                                |
| OJ1127_E01.125   | Putative Heterogeneous Nuclear Ribonucleoprotein | At3g07810 | Heterogeneous Nuclear Ribonucleoprotein, Putative / Hnrnp, Putative                          |
| OJ1131_E05.104   | Putative Nucleoid DNA-Binding Protein Cnd41      | At1g31450 | Aspartyl Protease Family Protein                                                             |
| OJ1131_E09.1     | Unknown Protein                                  | At3g25040 | ER Lumen Protein Retaining Receptor, Putative / HDEL Receptor, Putative                      |
| OJ1131_E09.11    | Putative Protein Kinase                          | At3g01090 | AKIN10 (Arabidopsis SNF1 Kinase Homolog 10, SNF1-RELATED PROTEIN KINASE 1.1); Protein Kinase |
| OJ1134_B10.8-2   | Putative Poli-Like DNA Polymerase                | At1g50840 | POLGAMMA2 (Polymerase Gamma 2); DNA Binding / DNA-Directed DNA Polymerase                    |
| OJ1134_E08.39-1  | Putative KIF4                                    | At5g47820 | FRA1 (FRAGILE FIBER 1); Microtubule Motor                                                    |
| OJ1134_F06.8-1   | Putative Peroxisomal Targeting Signal Type 2     | At1g29260 | PEX7 (Peroxin 7)                                                                             |
| OJ1134F05.13     | Putative Subtilisin-Like Serine Protease         | At4g26330 | UNE17 (Unfertilized Embryo Sac 17); Subtilase                                                |
| OJ1134F05.16     | Putative Protein Kinase                          | At5g56460 | Protein Kinase, Putative                                                                     |
| OJ1134F05.19     | Putative Abscisic Acid-Induced Protein           | At3g22490 | Late Embryogenesis Abundant Protein, Putative / LEA Protein, Putative                        |
| OJ1134F05.20     | Hypothetical Protein                             | At2g48000 | Pentatricopeptide (PPR) Repeat-Containing Protein                                            |
| OJ1135_F06.11    | Putative Kelch Repeat-Containing F-Box Family    | At1g55270 | Kelch Repeat-Containing F-Box Family Protein                                                 |
| OJ1135_F06.7     | Unknown Protein                                  | At2g25570 | Binding                                                                                      |
| OJ1136_A05.3     | Membrane Transporter PFB0275w-Like Protein       | At4g36790 | Transporter-Related                                                                          |
| OJ1136_A05.4     | Putative Dolichyl-Di-Phosphooligosaccharide-     | At5g66680 | DGL1 (Defective Glycosylation 1); Dolichyl-Diphosphooligosaccharide-Protein Glycotransferase |
| OJ1136_A05.5     | Putative Sip1 Protein                            | At3g57520 | ATSIP2 (ARABIDOPSIS THALIANA SEED IMBIBITION 2); Hydrolase, Hydrolyzing O-Glycosyl Compounds |
| OJ1136_A10.112   | Putative GMP Synthetase                          | At1g63660 | GMP Synthase (Glutamine-Hydrolyzing), Putative / Glutamine Amidotransferase, Putative        |
| OJ1136_C04.2     | Acyl-Coa Binding Protein-Like                    | At5g04420 | Kelch Repeat-Containing Protein                                                              |
| OJ1136_C04.4     | Putative Growth-On Protein GRO10                 | At1g63690 | Protease-Associated (PA) Domain-Containing Protein                                           |
| OJ1136_C04.9     | Putative O-Diphenol-O-Methyl Transferase         | At3g53140 | O-Diphenol-O-Methyl Transferase, Putative                                                    |
| OJ1136_D12.119-1 | Putative Sexual Differentiation Process Protein  | At4g26590 | ATOPT5 (Oligopeptide Transporter 5); Oligopeptide Transporter                                |
| OJ1136_D12.119-2 | Putative Sexual Differentiation Process Protein  | At5g55930 | ATOPT1 (Oligopeptide Transporter 1); Oligopeptide Transporter                                |
| OJ1145_E05.10    | Putative U2 Snrnp Protein A'                     | At1g09760 | U2A' (U2 Small Nuclear Ribonucleoprotein A); Protein Binding                                 |

|                 |                                                  |           |                                                                                                                                            |
|-----------------|--------------------------------------------------|-----------|--------------------------------------------------------------------------------------------------------------------------------------------|
| OJ1145_E05.12   | Putative Actin Related Protein 2/3 Complex, 21   | At1g60430 | ARPC3 (Actin-Related Protein C3)                                                                                                           |
| OJ1145_E05.4    | Putative Avr9/Cf-9 Rapidly Elicited Protein      | At1g29340 | PUB17 (PLANT U-BOX17); Ubiquitin-Protein Ligase                                                                                            |
| OJ1145_F01.1    | Unknown Protein                                  | At1g21060 | Unknown Protein                                                                                                                            |
| OJ1145_F01.11   | Putative Limonoid UDP-Glucosyltransferase        | At4g15480 | UGT84A1; UDP-Glycosyltransferase/ Sinapate 1-Glucosyltransferase/ Transferase, Transferring Glycosyl Groups                                |
| OJ1145_F01.6    | Putative Cinnamyl-Alcohol Dehydrogenase          | At4g34230 | Cad5 (Cinnamyl Alcohol Dehydrogenase 5)                                                                                                    |
| OJ1149_C12.16   | Putative Homoserine Kinase                       | At2g17265 | HSK (HOMOSERINE KINASE); Homoserine Kinase                                                                                                 |
| OJ1149_C12.24   | Putative Callose Synthase 1 Catalytic Subunit    | At5g13000 | ATGSL12 (GLUCAN SYNTHASE-LIKE 12); 1,3-Beta-Glucan Synthase/ Transferase, Transferring Glycosyl Groups                                     |
| OJ1149_C12.9    | Unknown Protein                                  | At3g19810 | Unknown Protein                                                                                                                            |
| OJ1150_A11.12-1 | Putative DHHC-Type Zinc Finger Domain-Containing | At3g22180 | Zinc Finger (DHHC Type) Family Protein                                                                                                     |
| OJ1150_A11.13   | Putative Peroxisome Biogenesis Protein PEX1      | At5g08470 | PEX1 (PEROXISOME 1); Atpase                                                                                                                |
| OJ1150_A11.17   | Putative Cysteine Proteinase                     | At5g50260 | Cysteine Proteinase, Putative                                                                                                              |
| OJ1150_A11.19-1 | Nucleic Acid-Binding Protein-Like                | At4g24770 | RBP31 (31-KDA RNA BINDING PROTEIN); RNA Binding                                                                                            |
| OJ1150_A11.24-2 | Putative Cyclophilin (70.8 Kd) (Cyp-15)          | At3g44600 | Peptidyl-Prolyl Cis-Trans Isomerase Cyclophilin-Type Family Protein                                                                        |
| OJ1150_A11.25   | Monodehydroascorbate Reductase                   | At3g52880 | ATMDAR1 (MONODEHYDROASCORBATE REDUCTASE 1); Monodehydroascorbate Reductase (NADH)                                                          |
| OJ1150_A11.26   | Two-Component Phosphorelay Mediator HP2          | At1g03430 | AHP5 (HISTIDINE-CONTAINING PHOSPHOTRANSFER FACTOR 5); Histidine Phosphotransfer Kinase                                                     |
| OJ1150_A11.31   | Putative 60S Ribosomal Protein L10A (RPL10aC)    | At5g22440 | 60S Ribosomal Protein L10A (RPL10aC)                                                                                                       |
| OJ1159_D09.23   | Lipase-Like Protein                              | At4g18550 | Lipase Class 3 Family Protein                                                                                                              |
| OJ1159_D09.7    | Lipase-Like Protein                              | At2g27360 | Lipase, Putative                                                                                                                           |
| OJ1163_G04.102  | Putative DEAH-Box RNA Helicase                   | At5g13010 | EMB3011 (EMBRYO DEFECTIVE 3011); RNA Helicase                                                                                              |
| OJ1163_G08.25   | Putative Histidine Amino Acid Transporter        | At5g40780 | LHT1 (LYSINE HISTIDINE TRANSPORTER 1); Amino Acid Transporter                                                                              |
| OJ1163_G08.29   | Putative Step II Splicing Factor SLU7            | At1g65660 | SMP1 (Swellmap 1); Nucleic Acid Binding                                                                                                    |
| OJ1163_G08.35   | Kelch Repeat-Containing Protein -Like            | At1g51540 | Unknown Protein                                                                                                                            |
| OJ1165_F02.103  | WSI76 Protein Induced By Water Stress            | At1g56600 | ATGOLS2 (ARABIDOPSIS THALIANA GALACTINOL SYNTHASE 2); Transferase, Transferring Glycosyl Groups / Transferase, Transferring Hexosyl Groups |
| OJ1165_F02.106  | Unknown Protein                                  | At4g24730 | Calcineurin-Like Phosphoesterase Family Protein                                                                                            |
| OJ1165_F02.107  | Membrane-Associated Salt-Inducible Protein-Like  | At5g65560 | Pentatricopeptide (PPR) Repeat-Containing Protein                                                                                          |
| OJ1165_F02.112  | Putative Importin Alpha 1                        | At1g09270 | Protein Transporter                                                                                                                        |
| OJ1165_F02.119  | Betaine Aldehyde Dehydrogenase-Like              | At3g66658 | ALDH22a1 (ALDEHYDE DEHYDROGENASE 22A1); 3-Chloroallyl Aldehyde Dehydrogenase                                                               |
| OJ1165_F02.125  | Putative ATP-Dependent Proteinase LON2           | At5g26860 | LON_ARA_ARA (Lon Protease Homolog Gene); ATP Binding / ATP-Dependent Peptidase/ Serine-Type Peptidase                                      |
| OJ1165_F02.126  | Aminoacyl Peptidase-Like                         | At2g47390 | Serine-Type Peptidase                                                                                                                      |
| OJ1165_F02.129  | Nicotianamine Synthase 3                         | At1g09240 | Nicotianamine Synthase, Putative                                                                                                           |
| OJ1167_G06.104  | Hypothetical Protein                             | At3g56220 | Unknown Protein                                                                                                                            |
| OJ1167_G06.113  | Peroxidase                                       | At5g05340 | Peroxidase, Putative                                                                                                                       |

|                  |                                               |           |                                                                                                  |
|------------------|-----------------------------------------------|-----------|--------------------------------------------------------------------------------------------------|
| OJ1172F09.5      | Unknown Protein                               | At2g20370 | MUR3 (MURUS 3); Catalytic                                                                        |
| OJ1175_B01.11    | Putative GAMYB-Binding Protein                | At1g77180 | Chromatin Protein Family                                                                         |
| OJ1175_B01.14-1  | Unknown Protein                               | At4g24610 | Unknown Protein                                                                                  |
| OJ1175_B01.14-2  | Unknown Protein                               | At4g24610 | Unknown Protein                                                                                  |
| OJ1175_B01.15    | Putative Immunophilin                         | At5g64350 | FKBP12 (FK506-Binding Protein 12 Kd); FK506 Binding / Peptidyl-Prolyl Cis-Trans Isomerase        |
| OJ1175_B01.17    | Putative Ethylene-Responsive Protein          | At1g09740 | Ethylene-Responsive Protein, Putative                                                            |
| OJ1175_B01.24    | Putative MADS Box Transcription Factor        | At4g24540 | AGL24 (AGAMOUS-LIKE 24); Transcription Factor                                                    |
| OJ1175_B01.8-1   | Putative F-Box Containing Protein TIR1        | At4g24390 | F-Box Family Protein (FBX14)                                                                     |
| OJ1175_B01.8-2   | F-Box Containing Protein TIR1-Like            | At5g49980 | AFB5 (AUXIN F-BOX PROTEIN 5); Ubiquitin-Protein Ligase                                           |
| OJ1175C11.5      | Putative Non-Symbiotic Hemoglobin 1           | At2g16060 | Ahb1 (Arabidopsis Hemoglobin 1)                                                                  |
| OJ1175C11.9      | Putative RING Zinc Finger Protein             | At4g34370 | IBR Domain-Containing Protein                                                                    |
| OJ1177_E11.3     | Putative Oxysterol Binding Protein            | At4g22540 | Oxysterol Binding                                                                                |
| OJ1177_E11.4-2   | Putative U3 Snorpp Protein IMP4               | At1g63780 | Imp4                                                                                             |
| OJ1186_G01.3     | Putative Chitinase Precursor                  | At1g05850 | POM1 (POM-POM1); Chitinase                                                                       |
| OJ1186_G01.31    | Putative Signal Recognition Particle Receptor | At5g05670 | Signal Recognition Particle Binding                                                              |
| OJ1186_G01.5     | Dnaj Protein Family-Like                      | At1g21080 | DNAJ Heat Shock N-Terminal Domain-Containing Protein                                             |
| OJ1191_A10.101   | Putative Auxin-Induced Protein                | At3g25290 | Auxin-Responsive Family Protein                                                                  |
| OJ1191_A10.105   | Putative Ribosomal Protein L32                | At4g18100 | 60S Ribosomal Protein L32 (RPL32A)                                                               |
| OJ1191_A10.113   | Putative GTP-Binding Protein(RAB11G)          | At2g31680 | Atraba5d (Arabidopsis Rab Gtpase Homolog A5d); GTP Binding                                       |
| OJ1191_A10.119   | Putative 70 Kda Peptidylprolyl Isomerase      | At3g25230 | ROF1 (ROTAMASE FKBP 1); FK506 Binding / Calmodulin Binding / Peptidyl-Prolyl Cis-Trans Isomerase |
| OJ1191_A10.124   | Putative Type 1 Capsule Synthesis Gene(Capi)  | At3g23820 | GAE6 (UDP-D-GLUCURONATE 4-EPIMERASE 6); Catalytic                                                |
| OJ1191_G08.12    | Putative NAD(P)-Dependent Cholesterol         | At2g33630 | 3-Beta Hydroxysteroid Dehydrogenase/Isomerase Family Protein                                     |
| OJ1197_D06.101   | Putative Receptor Protein Kinase              | At4g20140 | Leucine-Rich Repeat Transmembrane Protein Kinase, Putative                                       |
| OJ1198_B10.9     | Putative ABC Transporter                      | At3g47730 | ATATH1 (ABC2 Homolog 1); Atpase, Coupled To Transmembrane Movement Of Substances                 |
| OJ1200_C08.102   | Unknown Protein                               | At5g17780 | Hydrolase, Alpha/Beta Fold Family Protein                                                        |
| OJ1200_C08.105   | Carbonyl Reductase -Like Protein              | At2g24190 | Short-Chain Dehydrogenase/Reductase (SDR) Family Protein                                         |
| OJ1200_C08.118   | Unknown Protein                               | At1g08400 | Chromosome Structural Maintenance Protein-Related                                                |
| OJ1200_C08.121   | Putative Arabinoxylan Narabinofuranohydrolase | At3g10740 | ASD1 (ALPHA-L-ARABINOFURANOSIDASE); Hydrolase, Acting On Glycosyl Bonds                          |
| OJ1200_C08.122   | Putative Serine/Threonine Kinase              | At2g26980 | CIPK3 (CBL-INTERACTING PROTEIN KINASE 3); Kinase                                                 |
| OJ1200_C08.124-1 | Calmodulin                                    | At3g43810 | CAM7 (CALMODULIN 7); Calcium Ion Binding                                                         |
| OJ1202_E07.17    | Zinc Finger-Like                              | At3g09320 | Zinc Finger (DHHC Type) Family Protein                                                           |
| OJ1208D02.10     | Putative Proton-Dependent Oligopeptide        | At1g62200 | Proton-Dependent Oligopeptide Transport (POT) Family Protein                                     |
| OJ1211_G06.4     | Putative Calcium-Dependent Protein Kinase     | At1g18890 | ATCDPK1; Calcium- And Calmodulin-Dependent Protein Kinase/ Kinase/ Protein Kinase                |
| OJ1212_A08.12    | Unknown Protein                               | At1g73240 | Unknown Protein                                                                                  |



|               |                                              |           |                                                                                                                |
|---------------|----------------------------------------------|-----------|----------------------------------------------------------------------------------------------------------------|
| OJ1212_C01.15 | Putative Lung Seven Transmembrane Receptor 1 | At3g09570 | Unknown Protein                                                                                                |
| OJ1212_C05.11 | Putative Zinc Transporter                    | At5g59520 | ZIP2 (ZINC TRANSPORTER 2 PRECURSOR); Transferase, Transferring Glycosyl Groups / Zinc Ion Transporter          |
| OJ1212_C05.3  | Unknown Protein                              | At2g44310 | Calcium-Binding EF Hand Family Protein                                                                         |
| OJ1212_D02.6  | Unknown Protein                              | At5g40640 | Unknown Protein                                                                                                |
| OJ1212_D02.8  | Putative B-Keto Acyl Reductase               | At1g67730 | B-Keto Acyl Reductase, Putative (GLOSSY8)                                                                      |
| OJ1214_E03.13 | Putative 60S Ribosomal Protein L37a          | At3g60240 | Eif4g (Eukaryotic Translation Initiation Factor 4g)                                                            |
| OJ1214_E03.14 | Unknown Protein                              | At3g15180 | Proteasome-Related                                                                                             |
| OJ1214_E03.15 | Unknown Protein                              | At1g28380 | Nsl1 (Necrotic Spotted Lesions 1)                                                                              |
| OJ1214_E03.16 | Unknown Protein                              | At4g21700 | Unknown Protein                                                                                                |
| OJ1214_E03.3  | Putative Ribosomal Protein L35A              | At1g41880 | 60S Ribosomal Protein L35a (RPL35aB)                                                                           |
| OJ1214_E03.5  | Putative Dynamin                             | At5g42080 | ADL1 (ARABIDOPSIS DYNAMIN-LIKE PROTEIN); GTP Binding                                                           |
| OJ1214_E03.9  | Putative T-Complex Protein 1 Beta Subunit    | At5g20890 | Chaperonin, Putative                                                                                           |
| OJ1217_D10.10 | Endo-1,3                                     | At3g23570 | Dienelactone Hydrolase Family Protein                                                                          |
| OJ1217_D10.25 | Putative Flavonol 3-Sulfotransferase         | At1g28170 | Sulfotransferase Family Protein                                                                                |
| OJ1217_D10.27 | Putative Flavonol 3-Sulfotransferase         | At5g43690 | Sulfotransferase Family Protein                                                                                |
| OJ1217B09.14  | Putative Alcohol Dehydrogenase               | At1g22430 | Oxidoreductase/ Zinc Ion Binding                                                                               |
| OJ1217B09.18  | Hypothetical Protein                         | At1g60600 | ABC4 (ABERRANT CHLOROPLAST DEVELOPMENT 4); 1,4-Dihydroxy-2-Naphthoate Octaprenyltransferase/ Prenyltransferase |
| OJ1217B09.20  | Putative Ubiquitin-Specific Protease 3       | At4g39910 | ATUBP3 (UBIQUITIN-SPECIFIC PROTEASE 3); Ubiquitin-Specific Protease                                            |
| OJ1218_D07.5  | Putative Short-Chain Dehydrogenase/Reductase | At5g19200 | Short-Chain Dehydrogenase/Reductase (SDR) Family Protein                                                       |
| OJ1224_G08.21 | SWP1 Protein-Like                            | At3g04740 | Swp (Struwelpeter)                                                                                             |
| OJ1225_F07.14 | Unknown Protein                              | At5g12960 | Catalytic                                                                                                      |
| OJ1225_F07.15 | Putative Zinc-Finger Protein                 | At1g51200 | DNA Binding / Zinc Ion Binding                                                                                 |
| OJ1234_B11.20 | Putative Alcohol Oxidase                     | At4g28570 | Alcohol Oxidase-Related                                                                                        |
| OJ1234_B11.27 | Putative Protein Kinase (ADK1)               | At1g03930 | ADK1 (DUAL SPECIFICITY KINASE 1); Kinase                                                                       |
| OJ1249_F12.2  | Putative Nucleotide Sugar Epimerase          | At4g30440 | GAE1 (UDP-D-GLUCURONATE 4-EPIMERASE 1); UDP-Glucuronate 4-Epimerase/ Catalytic                                 |
| OJ1249_F12.29 | Unknown Protein                              | At3g01780 | Encodes TPLATE, A Cytokinesis Protein Targeted To The Cell Plate                                               |
| OJ1261C08.11  | Hypothetical Protein                         | At2g39710 | Aspartyl Protease Family Protein                                                                               |
| OJ1263_E10.15 | Protein Phosphatase 2A B'kappa Subunit       | At5g25510 | Serine/Threonine Protein Phosphatase 2A (PP2A) Regulatory Subunit B', Putative                                 |
| OJ1263_E10.4  | Putative Syntaxin 71 (SYP71)                 | At3g09740 | Syp71 (Syntaxin Of Plants 71)                                                                                  |
| OJ1263_E10.5  | Putative Anti-Silencing Protein              | At5g38110 | ASF1B/SGA01/SGA1 (Anti- Silencing Function 1b)                                                                 |
| OJ1263_E10.7  | Putative MATE Efflux Protein                 | At1g71140 | MATE Efflux Family Protein                                                                                     |
| OJ1263_E10.8  | Putative 50S Ribosomal Protein L12           | At1g70190 | Ribosomal Protein L12 Family Protein                                                                           |
| OJ1263_E10.9  | Putative Phosphatidylserine Synthase         | At1g15110 | Phosphatidyl Serine Synthase Family Protein                                                                    |
| OJ1263H11.6   | Unknown Protein                              | At5g51880 | Oxidoreductase, Acting On Paired Donors, With Incorporation Or Reduction Of Molecular                          |

|                 |                                                     |           |                                                                                                                                                                                                                                                                  |
|-----------------|-----------------------------------------------------|-----------|------------------------------------------------------------------------------------------------------------------------------------------------------------------------------------------------------------------------------------------------------------------|
| OJ1263H11.7     | Putative Phospholipase D Beta 2                     | At2g42010 | Oxygen, 2-Oxoglutarate As One Donor, And Incorporation Of One Atom Each Of Oxygen Into Both Donors<br>PLDBETA1 (PHOSPHOLIPASE D BETA 1); Phospholipase D                                                                                                         |
| OJ1264_A04.18   | Unknown Protein                                     | At5g27400 | Unknown Protein                                                                                                                                                                                                                                                  |
| OJ1264_A04.20   | Putative Mitogen-Activated Protein Kinase           | At5g19010 | MPK16 (Mitogen-Activated Protein Kinase 16); MAP Kinase                                                                                                                                                                                                          |
| OJ1268_B08.20   | Hypothetical Protein                                | At2g12210 | Transposable Element Gene                                                                                                                                                                                                                                        |
| OJ1268_B08.7    | Putative Malate Dehydrogenase                       | At3g15020 | Malate Dehydrogenase (NAD)                                                                                                                                                                                                                                       |
| OJ1268_B08.8    | GTP-Binding Nuclear Protein RAN-B1                  | At5g55190 | RAN3; GTP Binding                                                                                                                                                                                                                                                |
| OJ1276_B06.27   | Unknown Protein                                     | At3g27670 | RST1 (RESURRECTION1); Binding                                                                                                                                                                                                                                    |
| OJ1276_B06.28   | Putative Alliinase                                  | At4g24670 | Alliinase Family Protein                                                                                                                                                                                                                                         |
| OJ1281_H05.4    | Putative 60S Ribosomal Protein L36                  | At3g53740 | 60S Ribosomal Protein L36 (RPL36B)                                                                                                                                                                                                                               |
| OJ1281_H05.5    | Putative Hsp70                                      | At3g12580 | HSP70 (Heat Shock Protein 70); ATP Binding                                                                                                                                                                                                                       |
| OJ1281_H05.8    | 'GTP Cyclohydrolase                                 | At5g59750 | Riboflavin Biosynthesis Protein, Putative                                                                                                                                                                                                                        |
| OJ1282_E10.12-2 | Putative Na <sup>+</sup> /H <sup>+</sup> Antiporter | At2g31910 | Atchx21 (Cation/H <sup>+</sup> Exchanger 21)                                                                                                                                                                                                                     |
| OJ1282_E10.22-2 | Putative Peroxidase                                 | At5g42180 | Peroxidase 64 (PER64) (P64) (PRXR4)                                                                                                                                                                                                                              |
| OJ1282_E10.7    | Pentatricopeptide (PPR) Repeat-Containing           | At2g27610 | Pentatricopeptide (PPR) Repeat-Containing Protein                                                                                                                                                                                                                |
| OJ1282_H11.16-2 | Asparaginyl Endopeptidase REP-2                     | At1g62710 | BETA-VPE (Vacuolar Processing Enzyme Beta); Cysteine-Type Endopeptidase                                                                                                                                                                                          |
| OJ1287_H05.17-1 | Putative Vacuolar Protein Sorting Homolog           | At1g77140 | VPS45 (VACUOLAR PROTEIN SORTING 45); Protein Transporter                                                                                                                                                                                                         |
| OJ1288_G09.15   | Putative Trehalose-6-Phosphate Phosphatase          | At4g12430 | Trehalose-6-Phosphate Phosphatase, Putative                                                                                                                                                                                                                      |
| OJ1288_G09.19   | Putative Elicitor-Inducible Protein EIG-J7          | At2g22170 | Lipid-Associated Family Protein                                                                                                                                                                                                                                  |
| OJ1293_A01.6    | Putative Cellulase                                  | At3g43860 | Glycosyl Hydrolase Family 9 Protein                                                                                                                                                                                                                              |
| OJ1293_E04.24   | Glutathione S-Transferase C-Terminal                | At5g44000 | Glutathione S-Transferase C-Terminal Domain-Containing Protein                                                                                                                                                                                                   |
| OJ1293_E04.26   | Putative Ribosomal Protein L37                      | At3g16080 | 60S Ribosomal Protein L37 (RPL37C)                                                                                                                                                                                                                               |
| OJ1294_F06.14   | Putative Cytochrome P450                            | At5g25120 | CYP71B11 (Cytochrome P450, Family 71, Subfamily B, Polypeptide 11); Oxygen Binding                                                                                                                                                                               |
| OJ1294_F06.17   | Putative Signal Recognition Particle Receptor       | At2g45770 | CPFTSY (Ferric Reductase Deficient 4); GTP Binding                                                                                                                                                                                                               |
| OJ1294_F06.9    | Putative Receptor Protein Kinase                    | At3g28040 | Leucine-Rich Repeat Transmembrane Protein Kinase, Putative                                                                                                                                                                                                       |
| OJ1294_G06.18   | Putative Ribulose-1,5 Bisphosphate                  | At1g14030 | Ribulose-1,5 Bisphosphate Carboxylase Oxygenase Large Subunit N-Methyltransferase, Putative                                                                                                                                                                      |
| OJ1294_G06.25   | Putative Auxin-Independent Growth Promoter          | At5g65470 | Unknown Protein                                                                                                                                                                                                                                                  |
| OJ1297_C09.31   | Proteasome Subunit Beta Type 3                      | At1g21720 | PBC1 (20S Proteasome Beta Subunit C1); Peptidase                                                                                                                                                                                                                 |
| OJ1301_C12.3    | Putative Sorbitol Transporter                       | At3g18830 | ATPLT5 (POLYOL TRANSPORTER 5); D-Ribose Transporter/ D-Xylose Transporter/ Carbohydrate Transporter/ Galactose Transporter/ Glucose Transporter/ Glycerol Transporter/ Hydrogen: Sugar Symporter/ Mannitol Transporter/ Monosaccharide Transporter/ Myo-Inositol |
| OJ1310_F05.15   | Putative Poly(A)-Binding Protein                    | At4g34110 | PAB2 (POLY(A)-BINDING PROTEIN 2); RNA Binding                                                                                                                                                                                                                    |
| OJ1311_D08.27   | Putative Lysine-Ketoglutarate                       | At4g33150 | Lkr (Saccharopine Dehydrogenase)                                                                                                                                                                                                                                 |
| OJ1311_H06.22   | Receptor Protein Kinase-Like                        | At1g11330 | S-Locus Lectin Protein Kinase Family Protein                                                                                                                                                                                                                     |
| OJ1311_H06.4    | Dek1-Calpain-Like Protein                           | At1g55350 | DEK1 (DEFECTIVE KERNEL 1); Calpain/ Cysteine-Type Endopeptidase                                                                                                                                                                                                  |

|                  |                                                 |           |                                                                                                                                                                                     |
|------------------|-------------------------------------------------|-----------|-------------------------------------------------------------------------------------------------------------------------------------------------------------------------------------|
| OJ1316_A04.104   | Putative Glycosyltransferase                    | At3g06260 | GATL4 (Galacturonosyltransferase-Like 4); Polygalacturonate 4-Alpha-Galacturonosyltransferase/ Transferase, Transferring Glycosyl Groups / Transferase, Transferring Hexosyl Groups |
| OJ1316_A04.107   | Unknown Protein                                 | At4g17270 | Mo25 Family Protein                                                                                                                                                                 |
| OJ1316_E06.11-2  | Protein Kinase-Like                             | At5g57610 | Protein Kinase Family Protein                                                                                                                                                       |
| OJ1323_A06.27    | Putative Membrane Protein                       | At5g07250 | Rhomboid Family Protein                                                                                                                                                             |
| OJ1339_B08.1-1   | Putative Membrane Related Protein CP5           | At5g54170 | Unknown Protein                                                                                                                                                                     |
| OJ1339_F05.120-2 | Unknown Protein                                 | At1g56660 | Unknown Protein                                                                                                                                                                     |
| OJ1339_F05.125   | Putative Receptor-Like Protein Kinase           | At5g10020 | Leucine-Rich Repeat Transmembrane Protein Kinase, Putative                                                                                                                          |
| OJ1340_C08.105   | Unknown Protein                                 | At4g01870 | Tolb Protein-Related                                                                                                                                                                |
| OJ1340_C08.107   | Putative RAB24 Protein                          | At1g48130 | ATPER1 (Arabidopsis Thaliana 1-Cysteine Peroxiredoxin 1); Antioxidant                                                                                                               |
| OJ1340_C08.130   | Pyrrolidone Carboxyl Peptidase-Like Protein     | At1g56700 | Pyrrolidone-Carboxylate Peptidase Family Protein                                                                                                                                    |
| OJ1340_C08.131   | Putative Eukaryotic Translation Initiation      | At3g55620 | EMB1624 (EMBRYO DEFECTIVE 1624); Translation Initiation Factor                                                                                                                      |
| OJ1340_C08.132   | Putative Thymidylate Kinase                     | At5g59440 | Thymidylate Kinase Family Protein                                                                                                                                                   |
| OJ1342_D02.28    | Putative Cinnamate 4-Hydroxylase                | At2g30490 | Atc4h (Cinnamate-4-Hydroxylase)                                                                                                                                                     |
| OJ1342_D02.35    | Unknown Protein                                 | At2g34570 | MEE21 (Maternal Effect Embryo Arrest 21)                                                                                                                                            |
| OJ1342_D02.8     | Putative Oscctp                                 | At5g26220 | Chac-Like Family Protein                                                                                                                                                            |
| OJ1343_B12.129   | Putative Kinetochores Protein                   | At1g20140 | ASK4 (ARABIDOPSIS SKP1-LIKE 4); Ubiquitin-Protein Ligase                                                                                                                            |
| OJ1343_D04.112   | Putative Sex Determination Protein Tasselseed 2 | At3g26770 | Short-Chain Dehydrogenase/Reductase (SDR) Family Protein                                                                                                                            |
| OJ1343_D04.115   | Putative Sex Determination Protein Tasselseed 2 | At4g03140 | Oxidoreductase                                                                                                                                                                      |
| OJ1343_D04.123   | Putative Sex Determination Protein Tasselseed 2 | At3g51680 | Short-Chain Dehydrogenase/Reductase (SDR) Family Protein                                                                                                                            |
| OJ1343_D04.124   | Putative Sex Determination Protein Tasselseed 2 | At3g26760 | Short-Chain Dehydrogenase/Reductase (SDR) Family Protein                                                                                                                            |
| OJ1345_B12.1     | Putative Regulator Of Chromosome Condensation   | At5g42140 | Zinc Finger Protein, Putative / Regulator Of Chromosome Condensation (RCC1) Family Protein                                                                                          |
| OJ1345_B12.10    | Putative Apoptosis-Related Protein              | At1g29850 | Double-Stranded DNA-Binding Family Protein                                                                                                                                          |
| OJ1345_B12.11    | Unknown Protein                                 | At3g20550 | Ddl (Dawdle)                                                                                                                                                                        |
| OJ1345_D02.3     | Pentatricopeptide (PPR) Repeat-Containing       | At2g44880 | Pentatricopeptide (PPR) Repeat-Containing Protein                                                                                                                                   |
| OJ1345_D02.4     | Heat Shock Protein 82                           | At5g56030 | HSP81-2 (EARLY-RESPONSIVE TO DEHYDRATION 8); ATP Binding                                                                                                                            |
| OJ1349_D05.117   | Unknown Protein                                 | At1g06050 | Unknown Protein                                                                                                                                                                     |
| OJ1349_D05.131   | Putative Pentatricopeptide (PPR)                | At4g02750 | Pentatricopeptide (PPR) Repeat-Containing Protein                                                                                                                                   |
| OJ1349_D05.133   | Hypothetical Protein                            | At5g24600 | Unknown Protein                                                                                                                                                                     |
| OJ1349_D05.141   | Putative Pectinesterase                         | At4g12420 | SKU5 (Skewed 5); Copper Ion Binding                                                                                                                                                 |
| OJ1351_C05.110   | S-Receptor Kinase PK3 Precursor-Like Protein    | At1g67000 | Kinase                                                                                                                                                                              |
| OJ1351_C05.112   | Probable Photosystem II Oxygen-Evolving Complex | At1g06680 | PSBP-1 (OXYGEN-EVOLVING ENHANCER PROTEIN 2); Calcium Ion Binding                                                                                                                    |
| OJ1359_D06.12    | Putative Ribosomal Protein S4                   | At5g58420 | 40S Ribosomal Protein S4 (RPS4D)                                                                                                                                                    |
| OJ1359_D06.20    | Vacuolar Acid Invertase                         | At1g62660 | Beta-Fructosidase (BFRUCT3) / Beta-Fructofuranosidase / Invertase, Vacuolar                                                                                                         |
| OJ1359_D06.29    | Unknown Protein                                 | At1g33230 | Unknown Protein                                                                                                                                                                     |

|                 |                                                  |           |                                                                                                                    |
|-----------------|--------------------------------------------------|-----------|--------------------------------------------------------------------------------------------------------------------|
| OJ1361_E02.101  | Tetratricopeptide Repeat (TPR)-Containing        | At4g02680 | EOL1 (ETO1-LIKE 1); Binding                                                                                        |
| OJ1362_G11.1    | Putative Exostosin-2                             | At5g04500 | Glycosyltransferase Family Protein 47                                                                              |
| OJ1362_G11.18   | Putative 60S Ribosomal L28 Protein               | At2g19730 | 60S Ribosomal Protein L28 (RPL28A)                                                                                 |
| OJ1362_G11.23   | Putative LEA Protein                             | At5g44310 | Late Embryogenesis Abundant Domain-Containing Protein / LEA Domain-Containing Protein                              |
| OJ1364E02.4     | Putative LIM-Domain Protein                      | At2g39900 | LIM Domain-Containing Protein                                                                                      |
| OJ1364E02.5     | Unknown Protein                                  | At2g29560 | Enolase, Putative                                                                                                  |
| OJ1364E02.6     | Putative Class I Low-Molecular-Weight Heat Shock | At5g59720 | Hsp18.2 (Heat Shock Protein 18.2)                                                                                  |
| OJ1365_D05.10   | Putative Response Regulator Protein(Receiver     | At3g04280 | Arr22 (Arabidopsis Response Regulator 22)                                                                          |
| OJ1365_D05.6    | Putative Protein Transport SEC23-Related         | At5g43670 | Transport Protein, Putative                                                                                        |
| OJ1369_G08.17   | Putative CCR4-NOT Transcription Complex, Subunit | At5g59710 | VIP2 (VIRE2 INTERACTING PROTEIN2); Transcription Regulator                                                         |
| OJ1369_G08.3    | Lipase Class 3 Protein-Like                      | At3g14070 | CAX9 (CATION EXCHANGER 9); Cation:Cation Antiporter                                                                |
| OJ1369_G08.6    | Putative Polygalacturonase                       | At1g19170 | Glycoside Hydrolase Family 28 Protein / Polygalacturonase (Pectinase) Family Protein                               |
| OJ1371_D04.6    | Putative Cysteine Proteinase 1 Precursor         | At4g39090 | RD19 (RESPONSIVE TO DEHYDRATION 19); Cysteine-Type Peptidase                                                       |
| OJ1372_D06.21   | Kinetochore Protein-Like                         | At5g35520 | Kinetochore Protein-Related                                                                                        |
| OJ1372_D06.24   | Unknown Protein                                  | At4g10300 | Unknown Protein                                                                                                    |
| OJ1372_D06.35   | Putative CER1 Protein                            | At1g02190 | CER1 Protein, Putative                                                                                             |
| OJ1372_D12.114  | Putative PDR-Like ABC Transporter                | At2g36380 | ATPDR6/PDR6 (PLEIOTROPIC DRUG RESISTANCE 6); Atpase, Coupled To Transmembrane Movement Of Substances               |
| OJ1372_D12.115  | Putative Ionotropic Glutamate Receptor Homolog   | At1g05200 | ATGLR3.4 (Arabidopsis Thaliana Glutamate Receptor 3.4)                                                             |
| OJ1378_A04.7    | Hypothetical Protein                             | At1g22540 | Proton-Dependent Oligopeptide Transport (POT) Family Protein                                                       |
| OJ1384D03.15    | Putative CELL DIVISION CONTROL PROTEIN 2 HOMOLOG | At3g48750 | CDC2/CDC2A/CDC2AAT/CDK2/CDKA;1 (CELL DIVISION CONTROL 2); Cyclin-Dependent Protein Kinase/ Kinase/ Protein Binding |
| OJ1402_H07.4    | Putative CDC6                                    | At4g14700 | ATORC1A/ORC1A (ORIGIN OF REPLICATION COMPLEX 1A); DNA Binding                                                      |
| OJ1402_H07.8    | Putative AUX1-Like Permease                      | At2g38120 | AUX1 (AUXIN RESISTANT 1); Amino Acid Permease/ Transporter                                                         |
| OJ1409_C08.14-1 | Putative Serine/Threonine Kinase                 | At5g58380 | CIPK10 (CBL-INTERACTING PROTEIN KINASE 10); Kinase                                                                 |
| OJ1409_C08.19   | Putative Potassium Transporter                   | At2g40540 | Kt2 (Potassium Transporter 2)                                                                                      |
| OJ1409_C08.26   | Putative Alpha-Galactosidase                     | At3g56310 | Alpha-Galactosidase, Putative / Melibiase, Putative / Alpha-D-Galactoside Galactohydrolase, Putative               |
| OJ1414_E05.15   | Putative GA 2-Oxidase                            | At1g30040 | ATGA2OX2; Gibberellin 2-Beta-Dioxygenase                                                                           |
| OJ1414_E05.17   | Calcyclin Binding Protein-Like                   | At1g30070 | SGS Domain-Containing Protein                                                                                      |
| OJ1414_E05.5    | Unknown Protein                                  | At1g29980 | Unknown Protein                                                                                                    |
| OJ1414_E05.8    | Putative Potassium Channel                       | At5g46240 | KAT1 (K+ Atpase 1); Cyclic Nucleotide Binding / Inward Rectifier Potassium Channel                                 |
| OJ1435_F07.15   | Putative Amino Acid Transporter                  | At1g77380 | AAP3 (Amino Acid Permease 3); Amino Acid Permease                                                                  |
| OJ1435_F07.21   | Unknown Protein                                  | At5g61230 | Ankyrin Repeat Family Protein                                                                                      |
| OJ1435_F07.24-2 | Unknown Protein                                  | At5g45560 | Pleckstrin Homology (PH) Domain-Containing Protein / Lipid-Binding START Domain-Containing Protein                 |

|                  |                                                |           |                                                                                                                                                |
|------------------|------------------------------------------------|-----------|------------------------------------------------------------------------------------------------------------------------------------------------|
| OJ1435_F07.26    | Putative Rubisco Subunit Binding-Protein Beta  | At1g55490 | CPN60B (CHAPERONIN 60 BETA); ATP Binding / Protein Binding / Unfolded Protein Binding                                                          |
| OJ1435_F07.30    | Putative Nodulin Mtn21                         | At4g01440 | Nodulin Mtn21 Family Protein                                                                                                                   |
| OJ1435_F07.31    | Putative 60S Ribosomal Protein L9              | At1g33140 | 60S Ribosomal Protein L9 (RPL90A/C)                                                                                                            |
| OJ1435_F07.7     | Putative Family II Extracellular Lipase 3      | At1g75900 | Family II Extracellular Lipase 3 (EXL3)                                                                                                        |
| OJ1435_F07.8-1   | Putative Hydroxypyruvate Reductase             | At1g68010 | HPR (Hydroxypyruvate Reductase); NAD Binding / Cofactor Binding / Oxidoreductase, Acting On The CH-OH Group Of Donors, NAD Or NADP As Acceptor |
| OJ1442_E05.17    | Putative Iron-Phytosiderophore Transporter     | At3g17650 | YSL5 (YELLOW STRIPE LIKE 5); Oligopeptide Transporter                                                                                          |
| OJ1442_E05.18    | Putative Forever Young Oxidoreductase          | At4g27760 | FEY (FOREVER YOUNG); Oxidoreductase                                                                                                            |
| OJ1442_E05.22    | Putative 15.9 Kda Subunit Of RNA Polymerase II | At5g09920 | RPB15.9 (RNA Polymerase II 15.9)                                                                                                               |
| OJ1442_E05.24    | Unknown Protein                                | At1g73060 | Unknown Protein                                                                                                                                |
| OJ1442_E05.26    | Putative Minor Histocompatibility Antigen H13  | At2g03120 | Signal Peptide Peptidase Family Protein                                                                                                        |
| OJ1442_E05.31    | UDP-Glucose Pyrophosphorylase                  | At5g17310 | UTP--Glucose-1-Phosphate Uridyltransferase, Putative / UDP-Glucose Pyrophosphorylase, Putative / Ugpase, Putative                              |
| OJ1448_G06.10    | Putative Dnak-Type Molecular Chaperone         | At5g09590 | Mthsc70-2 (HEAT SHOCK PROTEIN 70); ATP Binding / Unfolded Protein Binding                                                                      |
| OJ1448_G06.11    | Putative DNA-3-Methyladenine Glycosylase       | At3g12040 | DNA-3-Methyladenine Glycosylase (MAG)                                                                                                          |
| OJ1448_G06.19    | Putative Cation Diffusion Facilitator 8        | At3g58060 | Cation Efflux Family Protein / Metal Tolerance Protein, Putative (Mtpc3)                                                                       |
| OJ1457_D07.109-1 | Putative Regulator Of Nonsense Transcripts 1   | At5g47010 | LBA1/UPF1 (LOW-LEVEL BETA-AMYLASE 1); RNA Helicase                                                                                             |
| OJ1457_D07.114   | GTP-Binding Protein Rab6                       | At2g44610 | RAB6; GTP Binding                                                                                                                              |
| OJ1457_D07.117   | Putative Malate Dehydrogenase                  | At2g13560 | Malate Oxidoreductase, Putative                                                                                                                |
| OJ1458_B07.103   | Putative Adapter Protein ATH-55                | At5g28740 | Transcription-Coupled DNA Repair Protein-Related                                                                                               |
| OJ1458_B07.124   | Unknown Protein                                | At5g19250 | Hypothetical Protein                                                                                                                           |
| OJ1460_H08.3     | Hypothetical Protein                           | At3g23610 | Dual Specificity Protein Phosphatase (Dsptp1)                                                                                                  |
| OJ1470_H06.117   | Putative Photosystem II 10 Kd Polypeptide      | At1g79040 | PSBR (Photosystem II Subunit R)                                                                                                                |
| OJ1476_F05.35    | Putative Pentatricopeptide (PPR)               | At1g19520 | NFD5 (NUCLEAR FUSION DEFECTIVE 5); Transcription Factor                                                                                        |
| OJ1477_F01.104-1 | XIAP Associated Factor-1-Like Protein          | At1g09920 | TRAF-Type Zinc Finger-Related                                                                                                                  |
| OJ1477_F01.111   | Unknown Protein                                | At5g12150 | Pleckstrin Homology (PH) Domain-Containing Protein / Rhogap Domain-Containing Protein                                                          |
| OJ1477_F01.112   | Putative Ferredoxin-Dependent Glutamate        | At5g04140 | Glu1 (Ferredoxin-Dependent Glutamate Synthase 1)                                                                                               |
| OJ1477_F01.114   | Nucleoid DNA-Binding-Like Protein              | At3g54400 | Aspartyl Protease Family Protein                                                                                                               |
| OJ1477_F01.115   | Phosphatidylinositol-4-Phosphate 5-Kinase-Like | At3g56960 | Phosphatidylinositol-4-Phosphate 5-Kinase Family Protein                                                                                       |
| OJ1477_F01.124   | Putative Condensin Subunit 1                   | At3g57060 | Binding                                                                                                                                        |
| OJ1477_F01.127   | Putative Developmental Protein Sina            | At3g61790 | Seven In Absentia (SINA) Family Protein                                                                                                        |
| OJ1479_B11.10    | Putative Glycosyl Hydrolase Family 35          | At2g16730 | BGAL13 (Beta-Galactosidase 13); Beta-Galactosidase                                                                                             |
| OJ1479_B11.11    | Putative Acyl Carrier Protein III, Chloroplast | At4g25050 | Acp4 (Acyl Carrier Protein 4)                                                                                                                  |
| OJ1479_B11.20    | Putative 21D7                                  | At1g20200 | EMB2719 (EMBRYO DEFECTIVE 2719); Binding                                                                                                       |
| OJ1479_B11.21    | Putative Ripening Regulated Protein DDTFR18    | At1g47530 | Ripening-Responsive Protein, Putative                                                                                                          |
| OJ1479_B11.3     | Proteasome Alpha Subunit                       | At5g66140 | PAD2 (20S Proteasome Alpha Subunit D2); Peptidase                                                                                              |

|                  |                                                 |           |                                                                                                                                                 |
|------------------|-------------------------------------------------|-----------|-------------------------------------------------------------------------------------------------------------------------------------------------|
| OJ1479_B11.7     | Typical P-Type R2R3 Myb Protein                 | At5g14340 | Atmyb40 (Myb Domain Protein 40); DNA Binding / Transcription Factor                                                                             |
| OJ1479_B11.9     | Putative Peroxisome Type Ascorbate Peroxidase   | At4g35000 | APX3 (ASCORBATE PEROXIDASE 3); L-Ascorbate Peroxidase                                                                                           |
| OJ1479_B12.21    | Putative Mono- Or Diacylglycerol                | At3g51520 | Diacylglycerol Acyltransferase Family                                                                                                           |
| OJ1479_B12.23    | Putative Diphosphate-Fructose-6-Phosphate       | At1g76550 | Pyrophosphate--Fructose-6-Phosphate 1-Phosphotransferase Alpha Subunit, Putative / Pyrophosphate-Dependent 6-Phosphofructose-1-Kinase, Putative |
| OJ1479_B12.26    | Putative Phosphoribosyl Pyrophosphate           | At2g42910 | Ribose-Phosphate Pyrophosphokinase 4 / Phosphoribosyl Diphosphate Synthetase 4 (PRS4)                                                           |
| OJ1479_B12.9     | Putative NADPH-Thioredoxin Reductase            | At4g35460 | NTR1 (NADPH-Dependent Thioredoxin Reductase 1)                                                                                                  |
| OJ1484_G09.129-1 | Phosphoenolpyruvate Carboxylase                 | At1g53310 | ATPPC1 (PHOSPHOENOLPYRUVATE CARBOXYLASE 1); Phosphoenolpyruvate Carboxylase                                                                     |
| OJ1485_B09.5     | Hypothetical Protein                            | At1g74680 | Exostosin Family Protein                                                                                                                        |
| OJ1485_B09.6     | Putative Leucine Zipper Protein                 | At5g50380 | ATEXO70F1 (Exocyst Subunit EXO70 Family Protein F1); Protein Binding                                                                            |
| OJ1486_E07.21    | Unknown Protein                                 | At2g23940 | Unknown Protein                                                                                                                                 |
| OJ1489_G03.3     | Putative NAD-/NADP-Dependent Oxidoreductase     | At1g54870 | Oxidoreductase                                                                                                                                  |
| OJ1489_G03.7     | Unknown Protein                                 | At4g15520 | Trna/Rna Methyltransferase (Spou) Family Protein                                                                                                |
| OJ1489_G03.9     | Unknown Protein                                 | At3g05170 | Phosphoglycerate/Bisphosphoglycerate Mutase Family Protein                                                                                      |
| OJ1499_D04.6     | Expressed Protein                               | At2g21640 | Unknown Protein                                                                                                                                 |
| OJ1499_D04.8     | Putative Leucine-Rich Repeat Receptor Kinase    | At4g39270 | Leucine-Rich Repeat Transmembrane Protein Kinase, Putative                                                                                      |
| OJ1499_D04.9     | Putative Cellular Retinaldehyde-Binding Protein | At1g75170 | Transporter                                                                                                                                     |
| OJ1506_A04.23    | WD-40 Repeat Protein-Like                       | At2g19430 | Transducin Family Protein / WD-40 Repeat Family Protein                                                                                         |
| OJ1506_A04.26    | Putative Adhesion Of Calyx Edges Protein ACE    | At1g72970 | HTH (HOTHEAD); Aldehyde-Lyase                                                                                                                   |
| OJ1506_F01.10    | Putative Aminotransferase                       | At2g13360 | Agt (Alanine:Glyoxylate Aminotransferase)                                                                                                       |
| OJ1506_F01.29    | Putative Sodium-Dicarboxylate Cotransporter     | At5g47560 | ATSDAT/ATTD (TONOPLAST DICARBOXYLATE TRANSPORTER); Malate Transporter/Sodium:Dicarboxylate Symporter                                            |
| OJ1513_F02.123   | Pentatricopeptide (PPR) Repeat-Containing       | At4g37380 | Pentatricopeptide (PPR) Repeat-Containing Protein                                                                                               |
| OJ1513_F02.135   | Casein Kinase II Alpha Subunit                  | At3g50000 | CKA2 (Casein Kinase II Alpha Chain 2); Kinase                                                                                                   |
| OJ1521_G02.18    | Ankyrin-Like Protein                            | At2g31820 | Ankyrin Repeat Family Protein                                                                                                                   |
| OJ1521_G02.8     | Putative 60S Ribosomal Protein L7 (RPL7A)       | At1g80750 | 60S Ribosomal Protein L7 (RPL7A)                                                                                                                |
| OJ1521_G02.9     | Putative Resistance Gene Analog PIC27           | At3g50950 | Disease Resistance Protein (CC-NBS-LRR Class), Putative                                                                                         |
| OJ1523_A02.1     | Reversibly Glycosylated Polypeptide             | At5g15650 | RGP2 (Reversibly Glycosylated Polypeptide-3); DNA Binding / Alpha-1,4-Glucan-Protein Synthase (UDP-Forming)                                     |
| OJ1523_A02.10    | Putative Chromosome Condensation Regulator      | At3g02300 | Regulator Of Chromosome Condensation (RCC1) Family Protein                                                                                      |
| OJ1523_A02.3     | Unknown Protein, 5'-Partial                     | At2g03730 | Acr5 (Act Domain Repeat 5)                                                                                                                      |
| OJ1524_D08.15    | Putative Copper-Transporting P-Type Atpase      | At1g63440 | HMA5 (HEAVY METAL ATPASE 5); Atpase, Coupled To Transmembrane Movement Of Ions, Phosphorylative Mechanism                                       |
| OJ1524_D08.16    | Putative Exopolygalacturonase Precursor         | At3g14040 | Exopolygalacturonase / Galacturan 1,4-Alpha-Galacturonidase / Pectinase                                                                         |
| OJ1524_D08.17    | Putative Fumarylacetoacetate Hydrolase          | At1g12050 | Fumarylacetoacetase, Putative                                                                                                                   |
| OJ1524_D08.18    | Putative 3-Oxoacyl Carrier Protein Synthase     | At2g04540 | 3-Oxoacyl-(Acyl-Carrier-Protein) Synthase II, Putative                                                                                          |
| OJ1524_D08.2     | Putative Dnaj Homolog, Subfamily C, Member 9    | At3g12170 | DNAJ Heat Shock N-Terminal Domain-Containing Protein                                                                                            |

|                  |                                                |           |                                                                                                     |
|------------------|------------------------------------------------|-----------|-----------------------------------------------------------------------------------------------------|
| OJ1524_D08.8     | Putative Outer Envelope Membrane Protein OEP75 | At5g19620 | Oep80 (Arabidopsis Thaliana Outer Envelope Protein Of 80 Kda)                                       |
| OJ1528D07.7      | Putative Glyceraldehyde-3-Phosphate            | At1g42970 | GAPB (GLYCERALDEHYDE-3-PHOSPHATE DEHYDROGENASE B SUBUNIT); Glyceraldehyde-3-Phosphate Dehydrogenase |
| OJ1529_G03.13    | Hypothetical Protein                           | At3g11460 | Pentatricopeptide (PPR) Repeat-Containing Protein                                                   |
| OJ1529_G03.7     | Ubiquitin Conjugating Enzyme                   | At3g08690 | UBC11 (Ubiquitin-Conjugating Enzyme 11); Ubiquitin-Protein Ligase                                   |
| OJ1532_D06.3     | Unknown Protein                                | At1g32250 | Calmodulin, Putative                                                                                |
| OJ1532_D06.5     | Unknown Protein                                | At3g26420 | ATRZ-1A; RNA Binding / Nucleotide Binding                                                           |
| OJ1532_D06.6     | Unknown Protein                                | At2g21660 | ATGRP7 (COLD, CIRCADIAN RHYTHM, AND RNA BINDING 2); RNA Binding                                     |
| OJ1534_E09.14    | Receptor Protein Kinase PERK1-Like             | At2g26330 | Er (Erecta, Quantitative Resistance To Plectosphaerella 1)                                          |
| OJ1534_E09.18    | Putative Myosin Heavy Chain                    | At1g54560 | Member Of Myosin-Like Proteins                                                                      |
| OJ1534_E09.23    | Putative Isoleucyl-Trna Synthetase             | At5g49030 | OVA2 (OVULE ABORTION 2); ATP Binding / Aminoacyl-Trna Ligase                                        |
| OJ1534_E09.9-2   | Unknown Protein                                | At5g35560 | DENN (AEX-3) Domain-Containing Protein                                                              |
| OJ1538_H05.7     | Putative CLB1 Protein                          | At1g20080 | C2 Domain-Containing Protein                                                                        |
| OJ1540_G08.30    | Putative SKP1 Interacting Partner 1            | At5g57900 | Skip1 (Skp1 Interacting Partner 1)                                                                  |
| OJ1540_H01.1     | Heat Shock Protein 90                          | At4g24190 | SHD (SHEPHERD); ATP Binding                                                                         |
| OJ1540_H01.10    | Putative Receptor Protein Kinase               | At1g75820 | CLV1 (CLAVATA 1); ATP Binding / Kinase/ Protein Serine/Threonine Kinase                             |
| OJ1540_H01.2     | Putative Senescence-Associated Protein         | At3g21600 | Senescence/Dehydration-Associated Protein-Related                                                   |
| OJ1540_H01.3     | Putative Zinc Finger Protein                   | At5g66070 | Protein Binding / Zinc Ion Binding                                                                  |
| OJ1540_H01.4     | Putative Protein Phosphatase                   | At3g51370 | Protein Phosphatase 2C, Putative / PP2C, Putative                                                   |
| OJ1548_F12.19    | Hypothetical Protein                           | At5g46760 | Basic Helix-Loop-Helix (Bhlh) Family Protein                                                        |
| OJ1548_F12.23    | Putative Quinone Oxidoreductase                | At4g21580 | Oxidoreductase, Zinc-Binding Dehydrogenase Family Protein                                           |
| OJ1548_F12.27-1  | GCN5-Related N-Acetyltransferase (GNAT) Family | At2g39000 | GCN5-Related N-Acetyltransferase (GNAT) Family Protein                                              |
| OJ1548_F12.6     | Putative Methyltransferase                     | At5g57280 | Unknown Protein                                                                                     |
| OJ1559_F09.109   | Ribosomal Protein S15                          | At5g59850 | 40S Ribosomal Protein S15A (RPS15aF)                                                                |
| OJ1559_F09.120   | Cellulose Synthase-4                           | At5g05170 | CESA3 (CELLULASE SYNTHASE 3); Cellulose Synthase/ Transferase, Transferring Glycosyl Groups         |
| OJ1562_B11.104   | Unknown Protein                                | At5g19850 | Hydrolase, Alpha/Beta Fold Family Protein                                                           |
| OJ1562_H01.1     | Unknown Protein                                | At1g64890 | Integral Membrane Transporter Family Protein                                                        |
| OJ1562_H01.2     | 'Unknown Protein, Contains                     | At1g31500 | Endonuclease/Exonuclease/Phosphatase Family Protein                                                 |
| OJ1562_H01.5     | Putative Cdc2 Protein Kinase                   | At5g10270 | CDKC;1 (CYCLIN-DEPENDENT KINASE C;1); Kinase                                                        |
| OJ1567_G09.101   | Zinc Finger And C2 Domain Protein-Like         | At1g73580 | C2 Domain-Containing Protein                                                                        |
| OJ1567_G09.119   | Putative 60S Ribosomal Protein                 | At3g24830 | 60S Ribosomal Protein L13A (RPL13aB)                                                                |
| OJ1567_G09.130   | Putative GTP Binding Protein                   | At1g50920 | GTP-Binding Protein-Related                                                                         |
| OJ1567_G09.131-2 | Putative Ferredoxin                            | At4g21090 | Electron Carrier                                                                                    |
| OJ1568_B05.11    | SNF7-Like Protein                              | At2g19830 | SNF7 Family Protein                                                                                 |
| OJ1568_B05.15    | Putative Arp3                                  | At1g13180 | DIS1 (DISTORTED TRICHOMES 1); Structural Constituent Of Cytoskeleton                                |

|                 |                                                |           |                                                                                                                     |
|-----------------|------------------------------------------------|-----------|---------------------------------------------------------------------------------------------------------------------|
| OJ1568_B05.16   | Rjs-Like Protein                               | At3g26100 | Regulator Of Chromosome Condensation (RCC1) Family Protein                                                          |
| OJ1568_B05.21   | NBS-LRR Disease Resistance Protein-Like        | At1g58400 | Disease Resistance Protein (CC-NBS-LRR Class), Putative                                                             |
| OJ1568_B05.26   | Ubiquitin-Like Protein                         | At5g40630 | Ubiquitin Family Protein                                                                                            |
| OJ1568_B05.3    | Putative Cellulase                             | At5g16700 | Glycosyl Hydrolase Family 5 Protein / Cellulase Family Protein                                                      |
| OJ1568_B05.8    | Putative Cytochrome P450                       | At5g63450 | CYP94B1 (Cytochrome P450, Family 94, Subfamily B, Polypeptide 1); Oxygen Binding                                    |
| OJ1572_F02.14   | Unknown Protein                                | At5g32440 | Unknown Protein                                                                                                     |
| OJ1572_F02.2    | BRAP2-Like Protein                             | At2g26000 | Catalytic                                                                                                           |
| OJ1572_F02.9    | Putative Ankyrin Repeat-Containing Protein     | At5g20350 | Tip1 (Tip Growth Defective 1)                                                                                       |
| OJ1575_B01.20   | Putative Preprotein Translocase Secy Subunit,  | At2g18710 | SCY1 (SECY HOMOLOG 1); Protein Translocase                                                                          |
| OJ1575_B01.21   | Putative Cyclic Nucleotide-Gated               | At3g48010 | ATCNGC16 (Cyclic Nucleotide Gated Channel 16); Calmodulin Binding / Cyclic Nucleotide Binding / Ion Channel         |
| OJ1579_C03.5    | Unknown Protein                                | At5g39360 | Circadian Clock Coupling Factor-Related                                                                             |
| OJ1581_H09.6    | DEAD/DEAH Box Helicase-Like                    | At1g12770 | Emb1586 (Embryo Defective 1586)                                                                                     |
| OJ1582_D10.10   | Unknown Protein                                | At2g32280 | Unknown Protein                                                                                                     |
| OJ1582_D10.12   | Histone H2A                                    | At4g27230 | Histone H2A, Putative                                                                                               |
| OJ1582_D10.6    | Putative Oxygen-Evolving Enhancer Protein 3-1, | At4g21280 | PSBQ/PSBQ-1/PSBQA; Calcium Ion Binding                                                                              |
| OJ1595_D08.27-1 | Unknown Protein                                | At3g03570 | Unknown Protein                                                                                                     |
| OJ1606_D04.114  | Putative Protein Kinase Xa21, Receptor Type    | At1g35710 | Leucine-Rich Repeat Transmembrane Protein Kinase, Putative                                                          |
| OJ1607A12.21    | Putative Sulfate Transporter ATST1             | At3g51895 | SULTR3;1 (SULFATE TRANSPORTER 1); Sulfate Transporter                                                               |
| OJ1607A12.3     | Hypothetical Protein                           | At3g56640 | Exocyst Complex Subunit Sec15-Like Family Protein                                                                   |
| OJ1607A12.5     | Putative Glutathione Reductase                 | At3g54660 | GR (GLUTATHIONE REDUCTASE); Glutathione-Disulfide Reductase                                                         |
| OJ1607A12.7     | Hypothetical Protein                           | At3g23020 | Pentatricopeptide (PPR) Repeat-Containing Protein                                                                   |
| OJ1611_C08.15   | Unknown Protein                                | At3g17740 | Hypothetical Protein                                                                                                |
| OJ1611_C08.2-1  | 1-Aminocyclopropane-1-Carboxylate Oxidase      | At1g05010 | EFE (Ethylene Forming Enzyme)                                                                                       |
| OJ1611_C08.25   | Universal Stress Protein / Early Nodulin       | At3g03270 | Universal Stress Protein (USP) Family Protein / Early Nodulin ENOD18 Family Protein                                 |
| OJ1611_C08.26   | Putative 1-Aminocyclopropane-1-Carboxylate     | At1g48420 | D-CDES (D-CYSTEINE DESULFHYDRASE); 1-Aminocyclopropane-1-Carboxylate Deaminase/ D-Cysteine Desulfhydrase/ Catalytic |
| OJ1611_C08.28   | Putative Cyclic Nucleotide-Binding Transporter | At3g17700 | CNBT1 (CYCLIC NUCLEOTIDE-BINDING TRANSPORTER 1); Calmodulin Binding / Cyclic Nucleotide Binding / Ion Channel       |
| OJ1611_C08.4    | Putative Beta-1,3-Glucanase Precursor          | At5g55180 | Glycosyl Hydrolase Family 17 Protein                                                                                |
| OJ1611_C08.7    | Unknown Protein                                | At2g32970 | Unknown Protein                                                                                                     |
| OJ1612_A04.101  | Putative Isopentenyl                           | At3g02780 | IPP2 (ISOPENTENYL PYROPHOSPHATE:DIMETHYLLALLYL PYROPHOSPHATE ISOMERASE 2); Isopentenyl-Diphosphate Delta-Isomerase  |
| OJ1612_A04.108  | Putative Phototropic Response Protein Family   | At5g48800 | Phototropic-Responsive NPH3 Family Protein                                                                          |
| OJ1612_A04.112  | Putative Translation Releasing Factor2         | At5g36170 | HCF109 (HIGH CHLOROPHYLL FLUORESCENT 109); Translation Release Factor                                               |
| OJ1613_G04.16   | Putative 33 Kda Secretory Protein              | At4g20670 | Lipase                                                                                                              |
| OJ1613_G04.20   | Putative Polycomb Group Protein FIE2           | At3g20740 | FIE (FERTILIZATION-INDEPENDENT ENDOSPERM 1); Nucleotide Binding / Transcription                                     |



|                  |                                                  |           |                                                                                                    |
|------------------|--------------------------------------------------|-----------|----------------------------------------------------------------------------------------------------|
|                  |                                                  |           | Factor                                                                                             |
| OJ1613_G04.21    | Putative Actin-Related Protein 4 (ARP4)          | At1g18450 | ATARP4 (ACTIN-RELATED PROTEIN 4); Structural Constituent Of Cytoskeleton                           |
| OJ1626_B09.15    | Unknown Protein                                  | At5g08320 | Unknown Protein                                                                                    |
| OJ1626_B09.4     | Alpha 2 Subunit Of 20S Proteasome                | At1g16470 | PAB1 (20S Proteasome Alpha Subunit B1); Peptidase                                                  |
| OJ1626_B09.8     | Putative Nitrilase 2                             | At5g22300 | Nit4 (Nitrilase 4)                                                                                 |
| OJ1626B05.9      | Putative Steroid 22-Alpha-Hydroxylase            | At3g50660 | Dwf4 (Dwarf 4)                                                                                     |
| OJ1634_B10.107   | Pentatricopeptide (PPR) Repeat-Containing        | At1g26460 | Pentatricopeptide (PPR) Repeat-Containing Protein                                                  |
| OJ1634_B10.122   | Putative WD-Repeat Protein 12                    | At5g15550 | Transducin Family Protein / WD-40 Repeat Family Protein                                            |
| OJ1634_H04.114   | Putative DNA-Directed RNA Polymerase Iia         | At5g51940 | DNA-Directed RNA Polymerase II, Putative                                                           |
| OJ1634_H04.119   | Putative RES Protein                             | At3g61180 | Zinc Finger (C3HC4-Type RING Finger) Family Protein                                                |
| OJ1641_C04.101   | Putative NAD Synthetase                          | At1g55090 | Carbon-Nitrogen Hydrolase Family Protein                                                           |
| OJ1643_A10.16    | Membrane-Associated Salt-Inducible Protein Like  | At4g36680 | Pentatricopeptide (PPR) Repeat-Containing Protein                                                  |
| OJ1643_A10.19    | Putative Replication Protein A2                  | At3g02920 | Replication Protein-Related                                                                        |
| OJ1643_A10.2     | Putative ADP-Ribosylation Factor-Directed Gtpase | At1g60860 | ARF Gtpase-Activating Domain-Containing Protein                                                    |
| OJ1643_A10.31    | Unknown Protein                                  | At5g23200 | Unknown Protein                                                                                    |
| OJ1643_A10.33-1  | Putative Carboxypeptidase D                      | At5g23210 | Scpl34                                                                                             |
| OJ1643_A10.34    | Putative Ubiquitin-Conjugating Enzyme E2         | At5g25760 | PEX4 (PEROXIN4); Ubiquitin-Protein Ligase                                                          |
| OJ1651_G11.6     | Unknown Protein                                  | At1g05130 | Unknown Protein                                                                                    |
| OJ1653_D06.5     | Putative Phosphoribosylglycinamide               | At1g31220 | Phosphoribosylglycinamide Formyltransferase                                                        |
| OJ1654_A02.17    | Unknown Protein                                  | At3g27470 | Unknown Protein                                                                                    |
| OJ1655_B12.15    | Putative Trehalose-6-Phosphate                   | At1g68020 | ATTPS6 (Arabidopsis Thaliana Trehalose Phosphatase/Synthase 6); Trehalose-Phosphatase              |
| OJ1655_B12.16    | Leaf Senescence Protein-Like                     | At5g64020 | Hypothetical Protein                                                                               |
| OJ1655_B12.20    | Putative Nuclear Protein P30                     | At5g16940 | Carbon-Sulfur Lyase                                                                                |
| OJ1655_B12.22    | Putative FEG Protein                             | At2g01730 | ATCPSF73-II (CLEAVAGE AND POLYADENYLATION SPECIFICITY FACTOR 73 KDA SUBUNIT-II); Catalytic         |
| OJ1656_A11.18    | Unknown Protein                                  | At1g08200 | Axs2 (Udp-D-Apiose/Udp-D-Xylose Synthase 2)                                                        |
| OJ1656_A11.4     | Aspartyl Aminopeptidase-Like Protein             | At5g04710 | Aspartyl Aminopeptidase, Putative                                                                  |
| OJ1656_A11.6     | Similar To Root Cap Protein                      | At5g54370 | Late Embryogenesis Abundant Protein-Related / LEA Protein-Related                                  |
| OJ1656_A11.8     | Similar To Root Cap Protein                      | At3g19430 | Late Embryogenesis Abundant Protein-Related / LEA Protein-Related                                  |
| OJ1656_E11.135   | Putative AKT1-Like Potassium Channel             | At2g26650 | AKT1 (ARABIDOPSIS K TRANSPORTER 1); Cyclic Nucleotide Binding / Inward Rectifier Potassium Channel |
| OJ1657_H11.2     | Putative Inosine-Uridine Preferring Nucleoside   | At5g18860 | Inosine-Uridine Preferring Nucleoside Hydrolase Family Protein                                     |
| OJ1661_C12.17-1  | Putative Avr9 Elicitor Response Protein          | At1g05170 | Galactosyltransferase Family Protein                                                               |
| OJ1661_C12.7     | Unknown Protein                                  | At3g01670 | Unknown Protein                                                                                    |
| OJ1664_D08.101-1 | Unknown Protein                                  | At5g19050 | Unknown Protein                                                                                    |
| OJ1664_D08.105   | Putative Mrna Binding Protein Precursor          | At3g63140 | Mrna-Binding Protein, Putative                                                                     |

|                  |                                                  |           |                                                                                                                  |
|------------------|--------------------------------------------------|-----------|------------------------------------------------------------------------------------------------------------------|
| OJ1664_D08.106   | Mutt-Like Protein                                | At3g12600 | ATNUDT16 (Arabidopsis Thaliana Nudix Hydrolase Homolog 16)                                                       |
| OJ1669_F01.30    | Putative GCPE Protein                            | At5g60600 | Gcpe (CHLOROPLAST BIOGENESIS 4); 4-Hydroxy-3-Methylbut-2-En-1-Yl Diphosphate Synthase                            |
| OJ1679_B08.15    | Putative Molybdopterin Synthase Large Subunit    | At2g43760 | Molybdopterin Biosynthesis Moae Family Protein                                                                   |
| OJ1679_B08.28    | Avrrpt2-Induced Protein 2-Like                   | At2g24390 | Unknown Protein                                                                                                  |
| OJ1679_B08.9     | Putative Cycloartenol Synthase                   | At2g07050 | Cas1 (Cycloartenol Synthase 1)                                                                                   |
| OJ1695_A02.17    | Putative D-Protein                               | At3g07720 | Kelch Repeat-Containing Protein                                                                                  |
| OJ1695_A02.21    | Integral Membrane Protein-Like                   | At5g02060 | Integral Membrane Protein, Putative                                                                              |
| OJ1695_A02.23    | Putative U4/U6-Associated RNA Splicing Factor    | At1g28060 | Small Nuclear Ribonucleoprotein Family Protein / Snrnp Family Protein                                            |
| OJ1695_A02.24    | Phosphatase 2A Regulatory A Subunit              | At3g25800 | PDF1 (65 KDA REGULATORY SUBUNIT OF PROTEIN PHOSPHATASE 2A); Protein Phosphatase Type 2A Regulator                |
| OJ1695_A02.34    | Putative Ferredoxin-Thioredoxin Reductase        | At2g04700 | Ferredoxin Thioredoxin Reductase Catalytic Beta Chain Family Protein                                             |
| OJ1695_H09.11    | Unknown Protein                                  | At3g54360 | Binding / Protein Binding / Zinc Ion Binding                                                                     |
| OJ1695_H09.19    | Putative DEAD Box-Like RNA Helicase              | At4g15850 | ATRH1 (Arabidopsis Thaliana RNA Helicase 1); ATP-Dependent Helicase                                              |
| OJ1695_H09.27-1  | Putative CCR4-NOT Transcription Complex Subunit  | At1g80780 | CCR4-NOT Transcription Complex Protein, Putative                                                                 |
| OJ1699_E05.18    | Putative Carboxyl-Terminal Proteinase            | At3g13510 | Unknown Protein                                                                                                  |
| OJ1699_E05.21    | Putative CMP-Sialic Acid Transporter             | At5g41760 | Nucleotide-Sugar Transporter                                                                                     |
| OJ1699_E05.34    | Unknown Protein                                  | At5g55170 | Sum3 (Small Ubiquitin-Like Modifier 3)                                                                           |
| OJ1699_E05.4     | Putative GDP-Fucose Protein-O-Fucosyltransferase | At5g50420 | Unknown Protein                                                                                                  |
| OJ1699_E05.40    | Tubulin Alpha-1 Chain                            | At5g19780 | TUA5 (Tubulin Alpha-5)                                                                                           |
| OJ1705_A03.38    | Putative Threonyl-Trna Synthetase                | At5g26830 | Threonyl-Trna Synthetase / Threonine--Trna Ligase (THRRS)                                                        |
| OJ1705_C03.129   | Unknown Protein                                  | At5g46060 | Unknown Protein                                                                                                  |
| OJ1705_E12.26    | Putative Citrate Synthase, Glyoxysomal Precursor | At2g42790 | CSY3 (CITRATE SYNTHASE 3); Citrate (SI)-Synthase                                                                 |
| OJ1705_E12.28    | Disease Resistance Protein Cf-2.1-Like           | At1g53440 | Leucine-Rich Repeat Family Protein / Protein Kinase Family Protein                                               |
| OJ1705_E12.35    | Las17 Binding Protein                            | At1g29800 | Zinc Ion Binding                                                                                                 |
| OJ1705B08.11     | Putative CAF Protein                             | At1g01040 | DCL1 (DICER-LIKE1); ATP-Dependent Helicase/ Ribonuclease III                                                     |
| OJ1705B08.7      | Putative Peroxidase                              | At1g05260 | RCI3 (RARE COLD INDUCIBLE GENE 3); Peroxidase                                                                    |
| OJ1710_H11.105-1 | Putative CND41, Chloroplast Nucleoid DNA Binding | At3g50050 | Aspartyl Protease Family Protein                                                                                 |
| OJ1710_H11.110   | Putative Nt-Gh3 Deduced Protein                  | At4g37390 | YDK1 (AUXIN UPREGULATED1, YADOKARI 1); Indole-3-Acetic Acid Amido Synthetase                                     |
| OJ1712_E04.5     | Putative Gamma Hydroxybutyrate Dehydrogenase     | At3g25530 | ATGHBDH/GHBDH; Phosphogluconate Dehydrogenase (Decarboxylating)                                                  |
| OJ1714_H10.115   | Unknown Protein                                  | At3g11780 | MD-2-Related Lipid Recognition Domain-Containing Protein / ML Domain-Containing Protein                          |
| OJ1714_H10.119-1 | Putative MADS-Box Transcription Factor CDM51     | At1g69180 | CRC (CRABS CLAW); Transcription Factor                                                                           |
| OJ1714_H10.124   | Unknown Protein                                  | At5g57040 | Lactoylglutathione Lyase Family Protein / Glyoxalase I Family Protein                                            |
| OJ1714_H10.127   | GPI-Anchored Protein -Like                       | At3g52370 | Beta-Ig-H3 Domain-Containing Protein / Fasciclin Domain-Containing Protein                                       |
| OJ1714_H10.135   | Putative Calcium-Dependent Protein Kinase 2      | At3g10660 | CPK2 (CALMODULIN-DOMAIN PROTEIN KINASE CDPK ISOFORM 2); Calcium- And Calmodulin-Dependent Protein Kinase/ Kinase |

|                 |                                                  |           |                                                                                                   |
|-----------------|--------------------------------------------------|-----------|---------------------------------------------------------------------------------------------------|
| OJ1714_H10.149  | Putative Cell Death Associated Protein           | At5g06570 | Hydrolase                                                                                         |
| OJ1715_A07.16   | Putative Beta-1,3-Galactosyltransferase 5        | At5g62620 | Galactosyltransferase Family Protein                                                              |
| OJ1715_H01.26   | 26S Proteasome Regulatory Particle Triple-A      | At1g53750 | RPT1A (Regulatory Particle Triple-A 1A); Atpase                                                   |
| OJ1715_H01.42   | Putative Ribosomal Protein L35A                  | At1g74270 | 60S Ribosomal Protein L35a (RPL35aC)                                                              |
| OJ1715_H01.9    | Lysine-Ketoglutarate Reductase/Saccharopine      | At4g33150 | Lkr (Saccharopine Dehydrogenase)                                                                  |
| OJ1717_A09.24   | Putative Protein Phosphatase 2C                  | At5g06750 | Protein Phosphatase 2C Family Protein / PP2C Family Protein                                       |
| OJ1717_A09.30   | Putative Ring Finger Protein                     | At1g20823 | Zinc Finger (C3HC4-Type RING Finger) Family Protein                                               |
| OJ1717_A09.34   | Putative Aspartate-Trna Ligase                   | At4g31180 | Aspartyl-Trna Synthetase, Putative / Aspartate--Trna Ligase, Putative                             |
| OJ1717_A09.37   | Putative GAMM1 Protein                           | At5g41970 | Unknown Protein                                                                                   |
| OJ1717_A09.39   | Unknown Protein                                  | At4g17670 | Senescence-Associated Protein-Related                                                             |
| OJ1720_F04.113  | Putative Ikappab Kinase Complex-Associated       | At5g13680 | ABO1/ELO2 (ABA-OVERLY SENSITIVE 1); Transcriptional Elongation Regulator                          |
| OJ1723_B06.130  | Unknown Protein                                  | At5g39650 | Unknown Protein                                                                                   |
| OJ1725_H08.12-2 | Mechanosensitive Ion Channel Domain-Containing   | At1g53470 | Mechanosensitive Ion Channel Domain-Containing Protein / MS Ion Channel Domain-Containing Protein |
| OJ1729_E01.2    | Putative Serine/Threonine Kinase -Related        | At4g05200 | Protein Kinase Family Protein                                                                     |
| OJ1729_E01.7    | Putative Serine/Threonine Kinase -Related        | At4g11530 | Protein Kinase Family Protein                                                                     |
| OJ1734_E02.30   | Alpha-Expansin Osexp5                            | At1g62980 | Atexpa18 (Arabidopsis Thaliana Expansin A18)                                                      |
| OJ1734_E02.35   | Putative Soluble Starch Synthase 2               | At3g01180 | Glycogen Synthase, Putative                                                                       |
| OJ1734_E02.38   | Putative Geranylgeranyl Reductase                | At1g74470 | Geranylgeranyl Reductase                                                                          |
| OJ1734_E02.41   | Putative Atpase                                  | At5g60730 | Anion-Transporting Atpase Family Protein                                                          |
| OJ1734_E02.43   | Putative Major Intrinsic Protein                 | At2g34390 | NIP2;1/NLM4 (NOD26-LIKE INTRINSIC PROTEIN 2;1); Water Channel                                     |
| OJ1734_E04.11   | Putative Iron Transporter Fe2                    | At1g10970 | ZIP4 (ZINC TRANSPORTER 4 PRECURSOR); Cation Transporter                                           |
| OJ1734_E04.23   | Unknown Protein                                  | At1g25510 | Aspartyl Protease Family Protein                                                                  |
| OJ1734_E04.4    | Putative UDP-N-Acetylglucosamine                 | At1g31070 | UDP-N-Acetylglucosamine Pyrophosphorylase-Related                                                 |
| OJ1741_B01.9    | Voltage-Dependent Anion-Selective Channel (VDAC) | At5g15090 | Porin, Putative / Voltage-Dependent Anion-Selective Channel Protein, Putative                     |
| OJ1743_B12.18   | Putative Cell Division Control Protein CDC91     | At1g12730 | Cell Division Cycle Protein-Related                                                               |
| OJ1743_B12.21-2 | Putative Purine Permease                         | At1g44750 | ATPUP11 (Arabidopsis Thaliana Purine Permease 11)                                                 |
| OJ1743_B12.30   | Putative Peptide Transporter                     | At1g32450 | Proton-Dependent Oligopeptide Transport (POT) Family Protein                                      |
| OJ1743_B12.36   | Unknown Protein                                  | At2g30530 | Unknown Protein                                                                                   |
| OJ1743_B12.39   | Putative Immediate-Early Fungal Elicitor Protein | At1g49780 | U-Box Domain-Containing Protein                                                                   |
| OJ1743_B12.40   | Putative Clathrin Coat Assembly Protein AP50     | At5g46630 | Clathrin Adaptor Complexes Medium Subunit Family Protein                                          |
| OJ1743_B12.5    | Putative Serine Carboxypeptidase                 | At1g33540 | SCPL18 (Serine Carboxypeptidase-Like 18); Serine Carboxypeptidase                                 |
| OJ1743A09.16    | Putative Leucine-Rich Repeat Transmembrane       | At1g48480 | RKL1 (Receptor-Like Kinase 1); ATP Binding / Kinase/ Protein Serine/Threonine Kinase              |
| OJ1743A09.2     | Putative Homocysteine S-Methyltransferase-1      | At3g25900 | ATHMT-1/HMT-1; Homocysteine S-Methyltransferase                                                   |
| OJ1743A09.5     | Putative Beta-1,3-Glucanase                      | At2g01630 | Glycosyl Hydrolase Family 17 Protein / Beta-1,3-Glucanase, Putative                               |

|                 |                                                  |           |                                                                                                     |
|-----------------|--------------------------------------------------|-----------|-----------------------------------------------------------------------------------------------------|
| OJ1743A09.9     | Putative Topoisomerase                           | At1g22730 | MA3 Domain-Containing Protein                                                                       |
| OJ1753_E03.106  | Putative Adenine Phosphoribosyl Transferase      | At4g22570 | APT3 (ADENINE PHOSPHORIBOSYL TRANSFERASE 3); Adenine Phosphoribosyltransferase                      |
| OJ1753_E03.112  | Putative Beta-Alanine Synthases                  | At5g64370 | BETA-UP (BETA-UREIDOPROPIONASE); Beta-Ureidopropionase                                              |
| OJ1754_E06.14   | Chalcone Isomerase                               | At3g55120 | TT5 (TRANSPARENT TESTA 5); Chalcone Isomerase                                                       |
| OJ1754_E06.16   | Ethylene-Responsive Small GTP-Binding Protein    | At3g46060 | Ara3                                                                                                |
| OJ1754_E06.24   | Unknown Protein                                  | At3g46450 | SEC14 Cytosolic Factor Family Protein / Phosphoglyceride Transfer Family Protein                    |
| OJ1754_E06.24   | Unknown Protein                                  | At5g02500 | HSC70-1 (Heat Shock Cognate 70 Kda Protein 1); ATP Binding                                          |
| OJ1754_E06.32   | Hypothetical Protein                             | At1g08070 | Pentatricopeptide (PPR) Repeat-Containing Protein                                                   |
| OJ1754_E06.9    | Putative Leukotriene A-4 Hydrolase               | At5g13520 | Peptidase M1 Family Protein                                                                         |
| OJ1756_H07.11   | Putative Ribosomal Protein S3a, Cytosolic        | At4g34670 | 40S Ribosomal Protein S3A (RPS3aB)                                                                  |
| OJ1756_H07.55   | Putative Pentatricopeptide (PPR)                 | At5g08490 | Pentatricopeptide (PPR) Repeat-Containing Protein                                                   |
| OJ1756_H07.62   | Putative Dipeptidyl Peptidase IV                 | At5g24260 | Prolyl Oligopeptidase Family Protein                                                                |
| OJ1767_D02.15-1 | Putative Inorganic Pyrophosphatase               | At5g09650 | Inorganic Pyrophosphatase Family Protein                                                            |
| OJ1767_D02.9-1  | Emp24/Gp25/P24-Like                              | At1g09580 | Emp24/Gp25/P24 Family Protein                                                                       |
| OJ1770_H02.15   | PIN1-Like Auxin Transport Protein-Like           | At5g15100 | PIN8 (PIN-FORMED 8); Auxin:Hydrogen Symporter/ Transporter                                          |
| OJ1770_H02.17   | Putative Proteasome Subunit Beta Type 1          | At3g60820 | PBF1 (20S Proteasome Beta Subunit F1); Peptidase                                                    |
| OJ1773_H01.102  | Putative Lysine Ketoglutarate Reductase          | At1g61240 | Unknown Protein                                                                                     |
| OJ1773_H01.103  | Putative 40S Ribosomal Protein S11               | At5g23740 | RPS11-BETA (RIBOSOMAL PROTEIN S11-BETA); Structural Constituent Of Ribosome                         |
| OJ1773_H01.109  | Unknown Protein                                  | At2g13330 | Transposable Element Gene; Gypsy-Like Retrotransposon Family,                                       |
| OJ1773_H01.113  | Putative Lysophospholipase Homolog               | At1g11090 | Hydrolase, Alpha/Beta Fold Family Protein                                                           |
| OJ1785_A05.14   | Putative Pentatricopeptide Repeat Containing     | At3g24000 | Pentatricopeptide (PPR) Repeat-Containing Protein                                                   |
| OJ1789_C07.10   | Putative Ribosomal Protein L17                   | At1g67430 | 60S Ribosomal Protein L17 (RPL17B)                                                                  |
| OJ1789_C07.13   | Moco Containing Protein(Osmcp)                   | At3g01910 | Sox (Sulfite Oxidase)                                                                               |
| OJ1789_C07.19   | Putative Diphosphonucleotide Phosphatase         | At1g13750 | Calcineurin-Like Phosphoesterase Family Protein                                                     |
| OJ1789_C07.21   | Putative Microtubule-Associated Protein          | At1g27920 | Microtubule Associated Protein (MAP65/ASE1) Family Protein                                          |
| OJ1789_C07.8    | Putative Uridine Kinase/Uracil                   | At5g40870 | ATUK/UPRT1; ATP Binding / Kinase/ Uracil Phosphoribosyltransferase/ Uridine Kinase                  |
| OJ1789_D08.10   | Glutaredoxin-Like                                | At5g14070 | Glutaredoxin Family Protein                                                                         |
| OJ1790_D02.27   | Putative Brassinosteroid Receptor                | At1g55610 | BRL1 (BRI 1 LIKE); Kinase                                                                           |
| OJ1790_D02.29-1 | Putative Aspartate Kinase, Homoserine            | At4g19710 | Ak-Hsdh/Ak-Hsdh li                                                                                  |
| OJ1791_B03.16   | Putative 26S Proteasome Non-AtPase Regulatory    | At4g24820 | 26S Proteasome Regulatory Subunit, Putative (RPN7)                                                  |
| OJ1791_B03.34   | Putative Glyceraldehyde-3-Phosphate              | At3g04120 | GAPC (GLYCERALDEHYDE-3-PHOSPHATE DEHYDROGENASE C SUBUNIT); Glyceraldehyde-3-Phosphate Dehydrogenase |
| OJ1791_B03.38   | Putative Pentatricopeptide (PPR)                 | At3g04130 | Binding                                                                                             |
| OJ1791_B03.41   | Ankyrin Repeat-Like Protein                      | At3g01750 | Ankyrin Repeat Family Protein                                                                       |
| OJ1791_B03.50-2 | 2 Coiled Coil Domains Of Eukaryotic Origin (31.3 | At3g18790 | Unknown Protein                                                                                     |

|                  |                                                  |           |                                                                                                                                                                  |
|------------------|--------------------------------------------------|-----------|------------------------------------------------------------------------------------------------------------------------------------------------------------------|
| OJ1793_E11.105   | Putative 5-Alpha-Taxadienol-10-Beta-Hydroxylase  | At5g36110 | CYP716A1 (Cytochrome P450, Family 716, Subfamily A, Polypeptide 1); Oxygen Binding                                                                               |
| OJ1793_E11.124   | Unknown Protein                                  | At1g50900 | Unknown Protein                                                                                                                                                  |
| OJ2056_H01.1     | Putative Delta-12 Oleate Desaturase              | At3g12120 | Fad2 (Fatty Acid Desaturase 2)                                                                                                                                   |
| OJ2056_H01.13    | Unknown Protein                                  | At2g42210 | ATOEP16-3; Protein Translocase                                                                                                                                   |
| OJ2056_H01.18    | Unknown Protein                                  | At5g48020 | Hypothetical Protein                                                                                                                                             |
| OJ2056_H01.22-1  | Putative 60S Ribosomal Protein L31               | At2g19740 | 60S Ribosomal Protein L31 (RPL31A)                                                                                                                               |
| OJ2056_H01.23    | Unknown Protein                                  | At5g13070 | MSF1-Like Family Protein                                                                                                                                         |
| OJ2056_H01.33    | ATP/ADP Translocator                             | At3g08580 | AAC1 (ADP/ATP CARRIER 1); Binding                                                                                                                                |
| OJ2056_H01.36    | Putative Fimbrin                                 | At5g35700 | Fimbrin-Like Protein, Putative                                                                                                                                   |
| OJ2056_H01.9     | Unknown Protein                                  | At5g19630 | Hypothetical Protein                                                                                                                                             |
| OJ9003_G05.12    | Putative Serine/Threonine Kinase                 | At5g07070 | CIPK2 (CBL-INTERACTING PROTEIN KINASE 2); Kinase                                                                                                                 |
| OJ9003_G05.21    | Putative SNF2 Domain-Containing Protein          | At3g54280 | ATP Binding / DNA Binding / Helicase                                                                                                                             |
| OJ9003_G05.28    | Polyubiquitin 6                                  | At4g05320 | Ubq10 (Polyubiquitin 10)                                                                                                                                         |
| OJ9003_G05.34    | Putative Ribosomal Protein S14                   | At3g52580 | 40S Ribosomal Protein S14 (RPS14C)                                                                                                                               |
| OJ991113_30.18   | Unknown Protein                                  | At1g06710 | Pentatricopeptide (PPR) Repeat-Containing Protein                                                                                                                |
| OJ991113_30.3    | Unknown Protein                                  | At1g67600 | Unknown Protein                                                                                                                                                  |
| OJ991113_30.4    | Unknown Protein                                  | At5g03860 | Malate Synthase, Putative                                                                                                                                        |
| OJ991113_30.7    | Unknown Protein                                  | At1g27190 | Leucine-Rich Repeat Transmembrane Protein Kinase, Putative                                                                                                       |
| OJ991113_30.8    | Unknown Protein                                  | At3g22320 | ATRPABC24.3 ("Arabidopsis Thaliana RNA Polymerase I, II And III 24.3 Kda Subunit"); DNA Binding / DNA-Directed RNA Polymerase                                    |
| OJ991214_12.1    | Unknown Protein                                  | At5g50250 | 31 Kda Ribonucleoprotein, Chloroplast, Putative / RNA-Binding Protein RNP-T, Putative / RNA-Binding Protein 1/2/3, Putative / RNA-Binding Protein Cp31, Putative |
| OJ991214_12.11   | Unknown Protein                                  | At3g53980 | Protease Inhibitor/Seed Storage/Lipid Transfer Protein (LTP) Family Protein                                                                                      |
| OJ991214_12.3    | Unknown Protein                                  | At1g08380 | PSAO (Photosystem I Subunit O)                                                                                                                                   |
| OJA1212_C06.18   | Putative Gtpase                                  | At3g47450 | Atnos1/Nos1                                                                                                                                                      |
| OJA1212_C06.25   | Lactate Dehydrogenase                            | At4g17260 | L-Lactate Dehydrogenase, Putative                                                                                                                                |
| OJA1325D05.4     | Putative HNH Endonuclease                        | At1g18680 | HNH Endonuclease Domain-Containing Protein                                                                                                                       |
| OJA1364E02.1     | Putative Heat Shock Protein                      | At3g46230 | ATHSP17.4 (Arabidopsis Thaliana Heat Shock Protein 17.4)                                                                                                         |
| OJA1364E02.2     | Putative Fructose-1,6-Biphosphotase, Chloroplast | At3g54050 | Fructose-1,6-Bisphosphatase, Putative / D-Fructose-1,6-Bisphosphate 1-Phosphohydrolase, Putative / Fbpase, Putative                                              |
| OSJNAa0087H07.7  | Putative Aldehyde Oxidase                        | At3g43600 | Aao2 (Aldehyde Oxidase 2)                                                                                                                                        |
| OSJNAb0015J03.9  | Putative Enolase (2-Phospho-D-Glycerate)         | At2g36530 | LOS2 (Low Expression Of Osmotically Responsive Genes 1); Phosphopyruvate Hydratase                                                                               |
| OSJNBa0001K12.13 | Putative Alcohol Oxidase                         | At4g19380 | Alcohol Oxidase-Related                                                                                                                                          |
| OSJNBa0001K12.5  | Putative Alcohol Oxidase                         | At3g23410 | Alcohol Oxidase-Related                                                                                                                                          |
| OSJNBa0001O14.1  | Putative Protein Phosphatase 2C                  | At4g38520 | Protein Phosphatase 2C Family Protein / PP2C Family Protein                                                                                                      |
| OSJNBa0001O14.11 | Putative Cora-Like Mg2+ Transporter Protein      | At3g58970 | Magnesium Transporter Cora-Like Family Protein                                                                                                                   |

|                  |                                               |           |                                                                                                                            |
|------------------|-----------------------------------------------|-----------|----------------------------------------------------------------------------------------------------------------------------|
| OSJNBa0001O14.15 | Hypothetical Protein                          | At5g04480 | Unknown Protein                                                                                                            |
| OSJNBa0001O14.3  | Putative C-4 Sterol Methyl Oxidase            | At4g12110 | SMO1-1 (STEROL-4ALPHA-METHYL OXIDASE 1-1); Catalytic                                                                       |
| OSJNBa0001O14.6  | Unknown Protein                               | At5g03460 | Unknown Protein                                                                                                            |
| OSJNBa0002I03.12 | Unknown Protein (C-Terminus Truncated)        | At1g47550 | Unknown Protein                                                                                                            |
| OSJNBa0002I03.14 | Putative U3 Small Nucleolar Ribonucleoprotein | At4g05410 | Transducin Family Protein / WD-40 Repeat Family Protein                                                                    |
| OSJNBa0002I03.18 | Putative Inositol Polyphosphate 5-Phosphatase | At1g47510 | Endonuclease/Exonuclease/Phosphatase Family Protein                                                                        |
| OSJNBa0002I03.19 | Putative LIM Domain Containing Protein        | At5g17890 | LIM Domain-Containing Protein / Disease Resistance Protein-Related                                                         |
| OSJNBa0002J24.3  | Putative Peroxidase                           | At4g37530 | Peroxidase, Putative                                                                                                       |
| OSJNBa0002J24.4  | Putative Peroxidase                           | At3g49960 | Peroxidase, Putative                                                                                                       |
| OSJNBa0002J24.6  | Putative Casein Kinase Alpha Subunit          | At2g23070 | Casein Kinase II Alpha Chain, Putative                                                                                     |
| OSJNBa0003G23.3  | Putative Ubiquitin-Conjugating Enzyme E2      | At5g42990 | UBC18 (Ubiquitin-Conjugating Enzyme 16); Ubiquitin-Protein Ligase                                                          |
| OSJNBa0003O19.10 | Putative Enoyl-Coa-Hydratase                  | At5g65940 | Chy1 (Beta-Hydroxyisobutyryl-Coa Hydrolase 1)                                                                              |
| OSJNBa0003O19.2  | Unknown Protein                               | At4g17870 | Unknown Protein                                                                                                            |
| OSJNBa0003O19.22 | Putative Adenosine Kinase                     | At4g27600 | Pfkb-Type Carbohydrate Kinase Family Protein                                                                               |
| OSJNBa0003O19.4  | Unknown Protein                               | At4g17890 | UBP20 (UBIQUITIN-SPECIFIC PROTEASE 20); DNA Binding                                                                        |
| OSJNBa0003O19.5  | Unknown Protein                               | At2g26890 | GRV2 (KATAMARI2); Binding / Heat Shock Protein Binding                                                                     |
| OSJNBa0003O19.6  | Unknown Protein                               | At2g38710 | AMMECR1 Family                                                                                                             |
| OSJNBa0003O19.7  | Putative Carnitine/Acylcarnitine Translocase  | At5g46800 | BOU (A BOUT DE SOUFFLE); Binding                                                                                           |
| OSJNBa0004A10.16 | Putative RNA-Binding Protein                  | At1g74230 | GR-RBP5 (Glycine-Rich RNA-Binding Protein 5); RNA Binding                                                                  |
| OSJNBa0004B24.15 | Putative Cytochrome P450 <sub>tyr</sub>       | At2g22330 | CYP79B3 (Cytochrome P450, Family 79, Subfamily B, Polypeptide 3); Oxygen Binding                                           |
| OSJNBa0004B24.2  | Putative Purple Acid Phosphatase              | At3g20500 | ATPAP18/PAP18 (Purple Acid Phosphatase 18); Acid Phosphatase/ Protein Serine/Threonine Phosphatase                         |
| OSJNBa0004B24.22 | Putative Membrane-Associated Salt-Inducible   | At5g08310 | Pentatricopeptide (PPR) Repeat-Containing Protein                                                                          |
| OSJNBa0004B24.3  | Hypothetical Protein                          | At1g50740 | Unknown Protein                                                                                                            |
| OSJNBa0004E08.1  | Putative Cyclophilin                          | At2g16600 | ROC3 (Rotamase Cyp 3)                                                                                                      |
| OSJNBa0004E08.10 | Putative Aldose 1-Epimerase - Like Protein    | At3g17940 | Aldose 1-Epimerase Family Protein                                                                                          |
| OSJNBa0004E08.12 | Putative Receptor-Like Protein Kinase         | At1g17750 | Leucine-Rich Repeat Transmembrane Protein Kinase, Putative                                                                 |
| OSJNBa0004G17.1  | Putative Phosphatidylinositol 4-Phosphate     | At1g21980 | ATPIP5K1 (Arabidopsis Thaliana 1-Phosphatidylinositol-4-Phosphate 5-Kinase 1); 1-Phosphatidylinositol-4-Phosphate 5-Kinase |
| OSJNBa0004L11.15 | Putative Beta-Glucosidase                     | At3g18080 | Glycosyl Hydrolase Family 1 Protein                                                                                        |
| OSJNBa0004L11.21 | Putative UDP-Glucuronosyl And UDP-Glucosyl    | At2g22590 | Glycosyltransferase Family Protein                                                                                         |
| OSJNBa0004L11.6  | Expressed Protein                             | At1g71940 | Unknown Protein                                                                                                            |
| OSJNBa0004N05.4  | Unknown Protein                               | At4g26740 | ATS1 (ARABIDOPSIS THALIANA SEED GENE 1); Calcium Ion Binding                                                               |
| OSJNBa0004N05.7  | Unknown Protein                               | At2g33380 | RD20 (RESPONSIVE TO DESSICATION 20); Calcium Ion Binding                                                                   |
| OSJNBa0004N05.8  | Unknown Protein                               | At4g16480 | ATINT4 (INOSITOL TRANSPORTER 4); Carbohydrate Transporter/ Myo-Inositol:Hydrogen Symporter/ Sugar Porter                   |

|                  |                                                |           |                                                                                                                                     |
|------------------|------------------------------------------------|-----------|-------------------------------------------------------------------------------------------------------------------------------------|
| OSJNBa0004P12.3  | Putative Endonuclease                          | At1g02270 | Endonuclease/Exonuclease/Phosphatase Family Protein / Calcium-Binding EF Hand Family Protein                                        |
| OSJNBa0005K07.1  | Actin                                          | At5g09810 | ACT7 (Actin 7)                                                                                                                      |
| OSJNBa0005K07.2  | Unknown Protein                                | At4g10440 | Dehydration-Responsive Family Protein                                                                                               |
| OSJNBa0005K07.3  | Putative Kinase                                | At2g46700 | Calcium-Dependent Protein Kinase, Putative / CDPK, Putative                                                                         |
| OSJNBa0005K07.4  | Putative Serine Peptidase                      | At4g36190 | Serine Carboxypeptidase S28 Family Protein                                                                                          |
| OSJNBa0005N02.3  | Unknown Protein                                | At1g48410 | Ago1 (Argonaute 1)                                                                                                                  |
| OSJNBa0005N02.7  | Unknown Protein                                | At1g08430 | ALMT1/ATALMT1 (AL-ACTIVATED MALATE TRANSPORTER 1); Malate Transporter                                                               |
| OSJNBa0006A01.11 | Unknown Protein                                | At5g01120 | Unknown Protein                                                                                                                     |
| OSJNBa0006A01.17 | Unknown Protein                                | At1g32160 | Unknown Protein                                                                                                                     |
| OSJNBa0006A01.18 | Unknown Protein                                | At1g68310 | Unknown Protein                                                                                                                     |
| OSJNBa0006A01.21 | Unknown Protein                                | At1g32050 | Secretory Carrier Membrane Protein (SCAMP) Family Protein                                                                           |
| OSJNBa0006A01.5  | Unknown Protein                                | At1g32340 | NHL8 (NDR1/HIN1-Like 8); Protein Binding / Zinc Ion Binding                                                                         |
| OSJNBa0006B20.20 | Unknown Protein                                | At1g21370 | Unknown Protein                                                                                                                     |
| OSJNBa0006B20.3  | Unknown Protein                                | At1g04290 | Thioesterase Family Protein                                                                                                         |
| OSJNBa0006B20.4  | Unknown Protein                                | At1g21750 | ATPDIL1-1 (PDI-LIKE 1-1); Protein Disulfide Isomerase                                                                               |
| OSJNBa0006B20.8  | Unknown Protein                                | At3g26540 | Pentatricopeptide (PPR) Repeat-Containing Protein                                                                                   |
| OSJNBa0006L06.1  | Putative Amylase                               | At3g23920 | BMV7/TR-BAMY (Beta-Amylase 7); Beta-Amylase                                                                                         |
| OSJNBa0006L06.21 | Putative Protein Kinase                        | At5g44700 | EDA23 (Embryo Sac Development Arrest 23); ATP Binding / Protein Serine/Threonine Kinase                                             |
| OSJNBa0006L06.28 | Putative Ribosomal Protein L11                 | At4g35490 | Ribosomal Protein L11 Family Protein                                                                                                |
| OSJNBa0006L06.3  | 60S Ribosomal Protein L21                      | At1g57860 | 60S Ribosomal Protein L21                                                                                                           |
| OSJNBa0006L06.5  | Putative WD-Repeat Containing Protein          | At1g04510 | Nucleotide Binding                                                                                                                  |
| OSJNBa0006L06.7  | 60S Ribosomal Protein L17                      | At3g04400 | EMB2171 (EMBRYO DEFECTIVE 2171); Structural Constituent Of Ribosome                                                                 |
| OSJNBa0006L06.8  | Putative Peroxin                               | At3g04460 | Apm4/Atpex12/Pex12 (Peroxin-12)                                                                                                     |
| OSJNBa0006L06.9  | Cap-Binding Protein P28                        | At5g35620 | LSP1 (LOSS OF SUSCEPTIBILITY TO POTYVIRUSES); RNA Binding / Translation Initiation Factor                                           |
| OSJNBa0006M15.16 | Unknown Protein                                | At2g20860 | LIP1 (Lipoic Acid Synthase 1); Lipoic Acid Synthase                                                                                 |
| OSJNBa0006M15.17 | Unknown Protein                                | At1g22200 | Unknown Protein                                                                                                                     |
| OSJNBa0006O14.4  | Unknown Protein                                | At3g18350 | Unknown Protein                                                                                                                     |
| OSJNBa0006O15.16 | Putative Lecithin-Cholesterol Acyl Transferase | At1g27480 | Lecithin:Cholesterol Acyltransferase Family Protein / LACT Family Protein                                                           |
| OSJNBa0006O15.28 | Serine/Threonine-Protein Kinase Nek4-Like      | At3g20860 | Protein Kinase Family Protein                                                                                                       |
| OSJNBa0007H12.40 | Putative Isocitrate Lyase                      | At3g21720 | Isocitrate Lyase, Putative                                                                                                          |
| OSJNBa0007M04.13 | Putative RNA Binding Protein                   | At5g04600 | RNA Recognition Motif (RRM)-Containing Protein                                                                                      |
| OSJNBa0007M04.24 | Putative Cell Division Cycle Protein           | At3g53230 | Cell Division Cycle Protein 48, Putative / CDC48, Putative                                                                          |
| OSJNBa0007M04.45 | Putative Trehalose-6-Phosphate Synthase        | At1g60140 | ATTPS10 (Arabidopsis Thaliana Trehalose Phosphatase/Synthase 10); Transferase, Transferring Glycosyl Groups / Trehalose-Phosphatase |

|                  |                                                |           |                                                                                                                                        |
|------------------|------------------------------------------------|-----------|----------------------------------------------------------------------------------------------------------------------------------------|
| OSJNBa0008C07.10 | Putative Wax Synthase                          | At5g55380 | Membrane Bound O-Acyl Transferase (MBOAT) Family Protein / Wax Synthase-Related                                                        |
| OSJNBa0008C11.15 | Leucine Zipper Protein-Like Protein            | At2g28650 | ATEXO70H8 (Exocyst Subunit EXO70 Family Protein H8); Protein Binding                                                                   |
| OSJNBa0008C11.35 | Unknown Protein                                | At3g23590 | Unknown Protein                                                                                                                        |
| OSJNBa0008C11.37 | Kinase Associated Protein Phosphatase          | At5g19280 | KAPP (Kinase-Associated Protein Phosphatase); Protein Phosphatase Type 2C                                                              |
| OSJNBa0008J01.16 | Putative S6 Ribosomal Protein Kinase           | At3g08720 | ATPK19/ATPK2 (ARABIDOPSIS THALIANA SERINE/THREONINE PROTEIN KINASE 19, ARABIDOPSIS THALIANA SERINE/THREONINE PROTEIN KINASE 2); Kinase |
| OSJNBa0008J01.17 | Putative Translation Initiation Factor Eif-2   | At5g20920 | Eif2 Beta (Embryo Defective 1401)                                                                                                      |
| OSJNBa0008J01.18 | Putative Receptor-Like Protein Kinase          | At5g58300 | Leucine-Rich Repeat Transmembrane Protein Kinase, Putative                                                                             |
| OSJNBa0008J01.21 | Putative Syringolide-Induced Protein           | At2g38600 | Acid Phosphatase Class B Family Protein                                                                                                |
| OSJNBa0008J01.23 | Putative Cytochrome P450                       | At5g24900 | CYP714A2 (Cytochrome P450, Family 714, Subfamily A, Polypeptide 2); Oxygen Binding                                                     |
| OSJNBa0008J01.24 | Putative Avr9/Cf-9 Rapidly Elicited Protein 31 | At4g20780 | Calcium-Binding Protein, Putative                                                                                                      |
| OSJNBa0008J01.6  | Putative Vacuolar Targeting Receptor           | At3g52850 | Atelp1 (Vacuolar Sorting Receptor Homolog)                                                                                             |
| OSJNBa0008M17.11 | Unknown Protein                                | At1g31280 | Ago2 (Argonaute 2)                                                                                                                     |
| OSJNBa0008M17.4  | Unknown Protein                                | At3g22200 | POP2 (POLLEN-PISTIL INCOMPATIBILITY 2); 4-Aminobutyrate Transaminase                                                                   |
| OSJNBa0009C07.16 | Putative Auxin-Regulated Protein               | At2g46370 | Jar1 (Jasmonate Resistant 1)                                                                                                           |
| OSJNBa0009C07.5  | Unknown Protein                                | At1g64110 | AAA-Type Atpase Family Protein                                                                                                         |
| OSJNBa0009C07.9  | Putative Calcium-Dependent Protein Kinase      | At4g23650 | CDPK6 (CALCIUM-DEPENDENT PROTEIN KINASE 6); Anion Channel/ Calcium- And Calmodulin-Dependent Protein Kinase/ Kinase                    |
| OSJNBa0009C08.12 | Unknown Protein                                | At3g61320 | Unknown Protein                                                                                                                        |
| OSJNBa0009C08.14 | Putative Aminotransferase                      | At5g65780 | ATBCAT-5; Branched-Chain-Amino-Acid Transaminase/ Catalytic                                                                            |
| OSJNBa0009E21.4  | Unknown Protein                                | At4g31130 | Unknown Protein                                                                                                                        |
| OSJNBa0009H03.25 | Putative Phosphoprotein Phosphatase            | At5g55260 | PPX2 (Protein Phosphatase X-2); Protein Serine/Threonine Phosphatase                                                                   |
| OSJNBa0009K15.12 | Unknown Protein                                | At3g51970 | Long-Chain-Alcohol O-Fatty-Acyltransferase Family Protein / Wax Synthase Family Protein                                                |
| OSJNBa0009L15.1  | Unknown Protein                                | At5g41880 | DNA Primase Small Subunit Family                                                                                                       |
| OSJNBa0009L15.3  | Putative Protein Phosphatase 2C                | At3g05640 | Protein Phosphatase 2C, Putative / PP2C, Putative                                                                                      |
| OSJNBa0010D21.3  | Unknown Protein                                | At1g74180 | Leucine-Rich Repeat Family Protein                                                                                                     |
| OSJNBa0010E04.10 | Putative Phospholipase                         | At1g07230 | Phosphoesterase Family Protein                                                                                                         |
| OSJNBa0010E04.11 | Anthranilate Synthase Alpha 1 Subunit          | At5g05730 | ASA1 (ANTHRANILATE SYNTHASE ALPHA SUBUNIT 1); Anthranilate Synthase                                                                    |
| OSJNBa0010E04.12 | Putative Small Nuclear Ribonucleoprotein       | At3g47120 | RNA Recognition Motif (RRM)-Containing Protein                                                                                         |
| OSJNBa0010E04.19 | Putative Ion Antiporter                        | At3g17630 | ATCHX19 (CATION/H+ EXCHANGER 19); Monovalent Cation:Proton Antiporter                                                                  |
| OSJNBa0010E04.5  | Putative Organic Solute Transporter            | At5g26734 | Unknown Protein                                                                                                                        |
| OSJNBa0010H02.13 | Unknown Protein                                | At1g19800 | Tgd1 (Trigalactosyldiacylglycerol 1)                                                                                                   |
| OSJNBa0010H02.16 | Unknown Protein                                | At5g47500 | Pectinesterase Family Protein                                                                                                          |
| OSJNBa0010H02.2  | Unknown Protein                                | At4g38390 | Unknown Protein                                                                                                                        |
| OSJNBa0010H02.23 | Unknown Protein                                | At1g12090 | ELP (EXTENSIN-LIKE PROTEIN); Lipid Binding                                                                                             |
| OSJNBa0010H02.6  | Unknown Protein                                | At3g20050 | ATTCP-1 (Arabidopsis Thaliana T-Complex Protein 1 Alpha Subunit); ATP Binding / Protein                                                |



|                   |                                               |           |                                                                                             |
|-------------------|-----------------------------------------------|-----------|---------------------------------------------------------------------------------------------|
| OSJNBa0010H02.9   | Unknown Protein                               | At2g45080 | Binding / Unfolded Protein Binding                                                          |
| OSJNBa0010K01.7   | Putative Receptor Protein Kinase              | At1g28440 | CYCP3;1 (Cyclin P3;1); Cyclin-Dependent Protein Kinase                                      |
| OSJNBa0010K08.8-1 | Putative Zinc Finger Protein                  | At1g01350 | HSL1 (HAESA-LIKE 1); ATP Binding / Kinase/ Protein Serine/Threonine Kinase                  |
| OSJNBa0010N03.13  | Putative Serine/Threonine Protein Kinase      | At4g14580 | Zinc Finger (CCCH-Type/C3HC4-Type RING Finger) Family Protein                               |
| OSJNBa0011F23.4   | Unknown Protein                               | At5g57330 | CIPK4 (CBL-INTERACTING PROTEIN KINASE 4); Kinase                                            |
| OSJNBa0011F23.7   | Unknown Protein                               | At1g73110 | Aldose 1-Epimerase Family Protein                                                           |
| OSJNBa0011H24.1   | Putative Fatty Acid Elongase                  | At5g04530 | Ribulose Bisphosphate Carboxylase/Oxygenase Activase, Putative / Rubisco Activase, Putative |
| OSJNBa0011H24.11  | Putative Fatty Acid Elongase                  | At2g28630 | Beta-Ketoacyl-Coa Synthase Family Protein                                                   |
| OSJNBa0011H24.19  | Putative Capping Protein Beta Subunit         | At1g71790 | Beta-Ketoacyl-Coa Synthase Family Protein                                                   |
| OSJNBa0011H24.21  | Putative Aldose 1-Epimerase                   | At3g47800 | F-Actin Capping Protein Beta Subunit Family Protein                                         |
| OSJNBa0011J03.9   | Hypothetical Protein                          | At4g38680 | Aldose 1-Epimerase Family Protein                                                           |
| OSJNBa0011J08.12  | Unknown Protein                               | At1g01590 | GRP2 (COLD SHOCK DOMAIN PROTEIN 2); Nucleic Acid Binding                                    |
| OSJNBa0011K22.4   | Unknown Protein                               | At3g02740 | FRO1 (FERRIC REDUCTION OXIDASE 1); Ferric-Chelate Reductase                                 |
| OSJNBa0011L07.13  | Unknown Protein                               | At3g58690 | Aspartyl Protease Family Protein                                                            |
| OSJNBa0011L07.8   | Unknown Protein                               | At4g34660 | Protein Kinase Family Protein                                                               |
| OSJNBa0011L09.11  | Putative Serine/Threonine Protein Kinase      | At2g05940 | SH3 Domain-Containing Protein 2 (SH3P2)                                                     |
| OSJNBa0011L09.20  | Putative Cucumisin-Like Serine Protease       | At2g05920 | Protein Kinase, Putative                                                                    |
| OSJNBa0011L09.6   | Hypothetical Protein                          | At5g14710 | Subtilase Family Protein                                                                    |
| OSJNBa0011L14.1   | Putative Phosphoserine Aminotransferase       | At4g35630 | Unknown Protein                                                                             |
| OSJNBa0011L14.11  | Putative Atfp6-Like Protein                   | At5g17450 | PSAT (Phosphoserine Aminotransferase); Phosphoserine Transaminase                           |
| OSJNBa0011L14.5   | Putative FH Protein Interacting Protein FIP2  | At5g55000 | Heavy-Metal-Associated Domain-Containing Protein / Copper Chaperone (CCH)-Related           |
| OSJNBa0011N12.22  | Glutelin C Precursor                          | At5g44120 | FIP2 (FH Protein Interacting Protein 2); Voltage-Gated Potassium Channel                    |
| OSJNBa0012K14.33  | Putative ATP Binding Protein Associated With  | At2g18990 | CRA1 (CRUCIFERINA); Nutrient Reservoir                                                      |
| OSJNBa0012L23.32  | Putative Transcription Factor                 | At1g73230 | Txd9 (Thioredoxin Domain-Containing Protein 9 Homolog)                                      |
| OSJNBa0013A09.12  | Expressed Protein                             | At1g69450 | Nascent Polypeptide-Associated Complex (NAC) Domain-Containing Protein                      |
| OSJNBa0013A09.13  | Putative Inositol 1,3,4-Trisphosphate         | At4g08170 | Unknown Protein                                                                             |
| OSJNBa0013A09.14  | Alpha Tubulin                                 | At1g50010 | Inositol 1,3,4-Trisphosphate 5/6-Kinase Family Protein                                      |
| OSJNBa0013D02.10  | Putative Ascorbate Peroxidase                 | At1g07890 | TUA2 (Tubulin Alpha-2 Chain)                                                                |
| OSJNBa0013D02.14  | Hypothetical Protein                          | At5g02830 | Apx1 (Ascorbate Peroxidase 1, Maternal Effect Embryo Arrest 6)                              |
| OSJNBa0013D02.19  | Hypothetical Protein                          | At3g45740 | Pentatricopeptide (PPR) Repeat-Containing Protein                                           |
| OSJNBa0013D02.6   | Putative Phosphate/Phosphoenolpyruvate        | At5g05820 | Hydrolase Family Protein / HAD-Superfamily Protein                                          |
| OSJNBa0013D02.9   | Putative MAP Kinase 1                         | At3g45640 | Phosphate Translocator-Related                                                              |
| OSJNBa0013H03.27  | Putative Peptidyl-Prolyl Cis-Trans Isomerase, | At3g01480 | ATMPK3 (MITOGEN-ACTIVATED PROTEIN KINASE 3); MAP Kinase/ Kinase/ Protein Kinase             |
| OSJNBa0013K16.2   | Unknown Protein                               | At4g35310 | Peptidyl-Prolyl Cis-Trans Isomerase, Putative / Cyclophilin, Putative / Rotamase, Putative  |
|                   |                                               |           | CPK5 (CALMODULIN-DOMAIN PROTEIN KINASE 5); Calcium- And Calmodulin-Dependent                |

|                    |                                                 |           |                                                                                          |
|--------------------|-------------------------------------------------|-----------|------------------------------------------------------------------------------------------|
| OSJNBa0013K16.8    | Unknown Protein                                 | At1g42540 | Protein Kinase/ Kinase                                                                   |
| OSJNBa0013M12.16   | Hypothetical Protein                            | At4g30880 | ATGLR3.3 (Arabidopsis Thaliana Glutamate Receptor 3.3)                                   |
| OSJNBa0013M12.21   | Hypothetical Protein                            | At5g61190 | Protease Inhibitor/Seed Storage/Lipid Transfer Protein (LTP) Family Protein              |
| OSJNBa0013M12.4    | Putative Vesicle Soluble NSF Attachment Protein | At3g17440 | Zinc Finger Protein-Related                                                              |
| OSJNBa0013M12.6    | Unknown Protein                                 | At3g21550 | NPSN13 (Novel Plant SNARE 13)                                                            |
| OSJNBa0013M12.7    | Putative Cytochrome P450-Related Protein        | At2g46950 | Unknown Protein                                                                          |
| OSJNBa0013M12.9    | Putative Peroxidase                             | At5g58390 | CYP709B2 (Cytochrome P450, Family 709, Subfamily B, Polypeptide 2); Oxygen Binding       |
| OSJNBa0013O08.2    | Putative Mucin                                  | At2g02880 | Peroxidase, Putative                                                                     |
| OSJNBa0014E22.2    | Putative F-Box Protein FBL2                     | At5g23340 | Mucin-Related                                                                            |
| OSJNBa0014E22.23-1 | Unknown Protein                                 | At5g23390 | Protein Binding                                                                          |
| OSJNBa0014E22.8    | ABA-Responsive Protein-Like                     | At5g13200 | Unknown Protein                                                                          |
| OSJNBa0014G15.2    | Putative Splicing Regulatory Protein            | At5g46870 | GRAM Domain-Containing Protein / ABA-Responsive Protein-Related                          |
| OSJNBa0014G15.3    | Putative Reductase                              | At5g37510 | RNA Recognition Motif (RRM)-Containing Protein                                           |
| OSJNBa0014G15.4    | Putative GTP-Binding Protein                    | At1g14830 | EMB1467 (EMBRYO DEFECTIVE 1467); NADH Dehydrogenase                                      |
| OSJNBa0014K14.4    | Unknown Protein                                 | At1g80530 | ADL1C (DYNAMIN-LIKE PROTEIN 5); GTP Binding / Gtpase                                     |
| OSJNBa0014M17.24   | Putative Immediate-Early Fungal Elicitor        | At3g52450 | Nodulin Family Protein                                                                   |
| OSJNBa0014O06.13   | Putative Integral Membrane Protein              | At2g23150 | U-Box Domain-Containing Protein                                                          |
| OSJNBa0014O06.18   | Putative Methionyl-Trna Synthetase              | At3g55400 | NRAMP3 (NRAMP Metal Ion Transporter 3); Manganese Ion Transporter/ Metal Ion Transporter |
| OSJNBa0014O06.3    | Hypothetical Protein                            | At1g03010 | Ova1 (Ovule Abortion 1)                                                                  |
| OSJNBa0015G17.1    | Putative Cytochrome P450 Protein, 3'-Partial    | At5g38970 | Phototropic-Responsive NPH3 Family Protein                                               |
| OSJNBa0015G17.23   | Putative Peptidyl-Prolyl Cis-Trans Isomerase    | At1g13690 | BR6OX1 (BRASSINOSTEROID-6-OXIDASE); Oxygen Binding                                       |
| OSJNBa0015J15.10   | Hypothetical Protein                            | At3g61410 | ATE1 (Atpase E1); Nucleic Acid Binding                                                   |
| OSJNBa0015J15.13   | Putative Lipid Transfer Protein                 | At4g12490 | Unknown Protein                                                                          |
| OSJNBa0015J15.3    | Putative Trehalose-6-Phosphate Phosphatase      | At4g22590 | Protease Inhibitor/Seed Storage/Lipid Transfer Protein (LTP) Family Protein              |
| OSJNBa0015J15.31   | Putative Proline Oxidase                        | At5g38710 | Trehalose-6-Phosphate Phosphatase, Putative                                              |
| OSJNBa0015J15.32   | Unknown Protein                                 | At5g47570 | Proline Oxidase, Putative / Osmotic Stress-Responsive Proline Dehydrogenase, Putative    |
| OSJNBa0015J15.7    | Putative Lipid Transfer Protein                 | At4g12520 | Unknown Protein                                                                          |
| OSJNBa0015K02.10   | Unknown Protein                                 | At4g27650 | Protease Inhibitor/Seed Storage/Lipid Transfer Protein (LTP) Family Protein              |
| OSJNBa0015K02.13   | Unknown Protein                                 | At5g16510 | PEL1 (PELOTA); Translation Release Factor                                                |
| OSJNBa0015K02.14   | Unknown Protein                                 | At3g13530 | Reversibly Glycosylated Polypeptide, Putative                                            |
| OSJNBa0015K02.18   | Unknown Protein                                 | At1g59312 | MAPKKK7 (MAP3K EPSILON PROTEIN KINASE); Kinase                                           |
| OSJNBa0015K02.19   | Unknown Protein                                 | At5g64910 | Unknown Protein                                                                          |
| OSJNBa0015K02.2    | Unknown Protein                                 | At5g35630 | Unknown Protein                                                                          |
| OSJNBa0015K02.7    | Unknown Protein                                 | At5g24940 | Gs2 (Glutamine Synthetase 2)                                                             |
|                    |                                                 |           | Protein Phosphatase 2C, Putative / PP2C, Putative                                        |

|                     |                                               |           |                                                                                                                    |
|---------------------|-----------------------------------------------|-----------|--------------------------------------------------------------------------------------------------------------------|
| OSJNBa0015N08.11    | Putative Basic Blue Copper Protein            | At2g02850 | ARPN (PLANTACYANIN); Copper Ion Binding                                                                            |
| OSJNBa0015N08.12    | Putative Transcription Factor                 | At1g17880 | Nascent Polypeptide-Associated Complex (NAC) Domain-Containing Protein / BTF3b-Like Transcription Factor, Putative |
| OSJNBa0015N08.13    | Translational Elongation Factor Tu            | At4g02930 | Elongation Factor Tu, Putative / EF-Tu, Putative                                                                   |
| OSJNBa0015N08.15    | Putative Proteasome Regulatory Non-Atpase     | At5g09900 | Emb2107 (Embryo Defective 2107)                                                                                    |
| OSJNBa0015N08.20    | Unknown Protein                               | At4g35450 | AKR2 (ANKYRIN REPEAT-CONTAINING PROTEIN 2); Protein Binding                                                        |
| OSJNBa0015N08.21    | Pantoate--Beta-Alanine Ligase                 | At5g48840 | PANC (Arabidopsis Homolog Of Bacterial Panc); Pantoate-Beta-Alanine Ligase                                         |
| OSJNBa0015N08.24    | Putative Der1-Like Protein                    | At4g04860 | Der1-Like Family Protein / Degradation In The ER-Like Family Protein                                               |
| OSJNBa0015N08.28    | Hypothetical Protein                          | At1g12700 | Helicase Domain-Containing Protein / Pentatricopeptide (PPR) Repeat-Containing Protein                             |
| OSJNBa0015N08.5     | Putative Aspartate Kinase                     | At5g13280 | Ak-Lys1 (Aspartate Kinase 1)                                                                                       |
| OSJNBa0015N08.9     | Putative                                      | At1g01630 | SEC14 Cytosolic Factor, Putative / Phosphoglyceride Transfer Protein, Putative                                     |
| OSJNBa0015O22.19    | Putative Peroxidase                           | At5g06720 | Peroxidase, Putative                                                                                               |
| OSJNBa0015O22.21    | Putative Peroxidase                           | At5g19890 | Peroxidase, Putative                                                                                               |
| OSJNBa0016A21.104   | ABC1 Family Protein Kinase-Like Protein       | At5g05200 | ABC1 Family Protein                                                                                                |
| OSJNBa0016A21.128-2 | Putative 40S Ribosomal Protein S12            | At2g32060 | 40S Ribosomal Protein S12 (RPS12C)                                                                                 |
| OSJNBa0016C11.4     | Zinc Finger Protein-Like                      | At3g47550 | Zinc Finger (C3HC4-Type RING Finger) Family Protein                                                                |
| OSJNBa0016G10.11    | Phosphodiesterase/Alkaline Phosphatase D-Like | At5g42370 | Unknown Protein                                                                                                    |
| OSJNBa0016G10.14    | Unknown Protein                               | At5g27830 | Hypothetical Protein                                                                                               |
| OSJNBa0016G10.4     | Putative 60S Ribosomal Protein L6 (RPL6C)     | At1g74050 | 60S Ribosomal Protein L6 (RPL6C)                                                                                   |
| OSJNBa0016G10.5     | Putative Brix Domain-Containing Protein       | At1g52930 | Brix Domain-Containing Protein                                                                                     |
| OSJNBa0016G10.6-2   | Putative AAK1 Protein                         | At2g32850 | Protein Kinase Family Protein                                                                                      |
| OSJNBa0016I09.14    | Hypothetical Protein                          | At5g64700 | Nodulin Mtn21 Family Protein                                                                                       |
| OSJNBa0016I09.24    | Putative Phosphoenolpyruvate Carboxylase      | At3g14940 | ATPPC3 (PHOSPHOENOLPYRUVATE CARBOXYLASE 3); Phosphoenolpyruvate Carboxylase                                        |
| OSJNBa0016I09.29    | Putative 14-3-3-Like Protein                  | At1g26480 | GRF12 (GENERAL REGULATORY FACTOR 12); Protein Phosphorylated Amino Acid Binding                                    |
| OSJNBa0016I09.3     | ATF6I18_13(AL022198 Pid:G2980770) Arabidopsis | At5g45820 | CIPK20 (CBL-INTERACTING PROTEIN KINASE 20); Kinase                                                                 |
| OSJNBa0016I09.7     | Hypothetical Protein                          | At3g14920 | Unknown Protein                                                                                                    |
| OSJNBa0016I09.8     | Putative S-Adenosyl-L-Methionine Synthetase   | At1g02500 | SAM1 (S-Adenosylmethionine Synthetase 1); Methionine Adenosyltransferase                                           |
| OSJNBa0016N23.106   | Putative Beta-Glucosidase Isozyme 2 Precursor | At2g44480 | Glycosyl Hydrolase Family 1 Protein                                                                                |
| OSJNBa0016N23.121   | Putative High-Affinity Potassium Transporter  | At1g31120 | KUP10 (K+ Transporter 10); Potassium Ion Transporter                                                               |
| OSJNBa0016N23.122   | Putative Alcohol Dehydrogenase Homolog        | At1g62610 | Oxidoreductase                                                                                                     |
| OSJNBa0016O02.24    | Unknown Protein                               | At5g47810 | Phosphofructokinase Family Protein                                                                                 |
| OSJNBa0016O02.3     | Unknown Protein                               | At5g08170 | EMB1873 (EMBRYO DEFECTIVE 1873); Agmatine Deiminase                                                                |
| OSJNBa0016O02.9     | Unknown Protein                               | At5g48220 | Indole-3-Glycerol-Phosphate Synthase                                                                               |
| OSJNBa0017B10.17    | Unknown Protein                               | At2g25720 | Unknown Protein                                                                                                    |
| OSJNBa0017E08.10    | Putative Pre-Mrna Splicing Factor             | At4g03430 | STA1 (STABILIZED1); RNA Splicing Factor, Transesterification Mechanism                                             |

|                  |                                             |           |                                                                                                                                                       |
|------------------|---------------------------------------------|-----------|-------------------------------------------------------------------------------------------------------------------------------------------------------|
| OSJNBa0017E08.12 | Putative Epoxide Hydrolase                  | At3g51000 | Epoxide Hydrolase, Putative                                                                                                                           |
| OSJNBa0017E08.18 | Putative Membrane-Associated Protein        | At1g12700 | Helicase Domain-Containing Protein / Pentatricopeptide (PPR) Repeat-Containing Protein                                                                |
| OSJNBa0017E08.4  | Putative Lanthionine Synthetase             | At1g52920 | Catalytic                                                                                                                                             |
| OSJNBa0017E08.8  | Putative Dehydrogenase                      | At4g27440 | PORB (PROTOCHLOROPHYLLIDE OXIDOREDUCTASE B); Oxidoreductase/<br>Protochlorophyllide Reductase                                                         |
| OSJNBa0017J22.12 | Unknown Protein                             | At3g55070 | Unknown Protein                                                                                                                                       |
| OSJNBa0017J22.13 | Putative Ubiquitin / Ribosomal Protein S27a | At2g47110 | UBQ6 (Ubiquitin 6); Protein Binding                                                                                                                   |
| OSJNBa0017J22.5  | Unknown Protein                             | At3g17205 | UPL6 (UBIQUITIN PROTEIN LIGASE 6); Ubiquitin-Protein Ligase                                                                                           |
| OSJNBa0017J22.6  | Unknown Protein                             | At1g09330 | Hypothetical Protein                                                                                                                                  |
| OSJNBa0017N12.13 | Putative Phosphate Synthase                 | At1g22410 | 2-Dehydro-3-Deoxyphosphoheptonate Aldolase, Putative / 3-Deoxy-D-Arabino-Heptulosonate 7-<br>Phosphate Synthase, Putative / DAHP Synthetase, Putative |
| OSJNBa0017N12.5  | Histone H3.2 Protein                        | At5g10980 | Histone H3                                                                                                                                            |
| OSJNBa0017N12.8  | Abscisic Acid-Inducible Protein Kinase      | At1g78290 | Serine/Threonine Protein Kinase, Putative                                                                                                             |
| OSJNBa0018H01.3  | Unknown Protein                             | At2g34690 | Acd11 (Accelerated Cell Death 11)                                                                                                                     |
| OSJNBa0018H01.6  | Putative Basic Protein                      | At2g26720 | Plastocyanin-Like Domain-Containing Protein / Mavicyanin, Putative                                                                                    |
| OSJNBa0018H01.7  | Putative Glutathione S-Transferase          | At1g65820 | Microsomal Glutathione S-Transferase, Putative                                                                                                        |
| OSJNBa0018H01.9  | Putative Snmp Protein                       | At2g33730 | DEAD Box RNA Helicase, Putative                                                                                                                       |
| OSJNBa0018I03.26 | Atpase-Like Protein                         | At5g44240 | Haloacid Dehalogenase-Like Hydrolase Family Protein                                                                                                   |
| OSJNBa0018K15.1  | Putative Arm Repeat Protein                 | At5g01830 | Armadillo/Beta-Catenin Repeat Family Protein / U-Box Domain-Containing Protein                                                                        |
| OSJNBa0018M05.1  | Unknown Protein                             | At1g47875 | Pseudogene, Hypothetical Protein                                                                                                                      |
| OSJNBa0018M05.13 | Unknown Protein                             | At3g18620 | Zinc Finger (DHHC Type) Family Protein                                                                                                                |
| OSJNBa0018M05.14 | Unknown Protein                             | At1g65730 | YSL7 (YELLOW STRIPE LIKE 7); Oligopeptide Transporter                                                                                                 |
| OSJNBa0018M05.15 | Unknown Protein                             | At5g16370 | AMP-Binding Protein, Putative                                                                                                                         |
| OSJNBa0018M05.16 | Unknown Protein                             | At1g48930 | Endo-1,4-Beta-Glucanase, Putative / Cellulase, Putative                                                                                               |
| OSJNBa0018M05.18 | Unknown Protein                             | At5g23110 | Zinc Finger (C3HC4-Type RING Finger) Family Protein                                                                                                   |
| OSJNBa0018M05.19 | Unknown Protein                             | At5g23240 | DNAJ Heat Shock N-Terminal Domain-Containing Protein                                                                                                  |
| OSJNBa0018M05.20 | Unknown Protein                             | At1g34130 | STT3B (STAUROSPORIN AND TEMPERATURE SENSITIVE 3-LIKE B); Oligosaccharyl<br>Transferase                                                                |
| OSJNBa0018M05.21 | Unknown Protein                             | At1g63070 | Pentatricopeptide (PPR) Repeat-Containing Protein                                                                                                     |
| OSJNBa0018M05.8  | Unknown Protein                             | At3g17670 | Binding                                                                                                                                               |
| OSJNBa0018M05.9  | Unknown Protein                             | At2g03690 | Coenzyme Q Biosynthesis Coq4 Family Protein / Ubiquinone Biosynthesis Coq4 Family Protein                                                             |
| OSJNBa0018M09.11 | Putative SERK2 Protein                      | At5g10290 | Leucine-Rich Repeat Family Protein / Protein Kinase Family Protein                                                                                    |
| OSJNBa0019D11.15 | Unknown Protein                             | At3g62470 | Pentatricopeptide (PPR) Repeat-Containing Protein                                                                                                     |
| OSJNBa0019D11.19 | Unknown Protein                             | At5g54140 | ILL3 (IAA-Amino Acid Hydrolase ILR1-Like 3); Metallopeptidase                                                                                         |
| OSJNBa0019D11.5  | Unknown Protein                             | At1g03360 | ATRRP4; Exonuclease                                                                                                                                   |
| OSJNBa0019F11.10 | Hypothetical Protein                        | At1g19370 | Unknown Protein                                                                                                                                       |

|                  |                                        |           |                                                                                                             |
|------------------|----------------------------------------|-----------|-------------------------------------------------------------------------------------------------------------|
| OSJNBa0019F11.13 | Putative 60S Ribosomal Protein         | At3g49010 | ATBBC1 (Breast Basic Conserved 1)                                                                           |
| OSJNBa0019F11.19 | Putative Syntaxin Protein              | At3g05710 | SYP43 (Syntaxin 43); T-SNARE                                                                                |
| OSJNBa0019F11.23 | Putative Plastid Protein               | At1g32580 | Plastid Developmental Protein DAG, Putative                                                                 |
| OSJNBa0019F11.5  | Unknown Protein                        | At5g17210 | Unknown Protein                                                                                             |
| OSJNBa0019G23.2  | Unknown Protein                        | At5g04360 | ATPU1 (PULLULANASE 1); Alpha-Amylase/ Limit Dextrinase                                                      |
| OSJNBa0019G23.3  | Unknown Protein                        | At1g20030 | Pathogenesis-Related Thaumatin Family Protein                                                               |
| OSJNBa0019G23.6  | Unknown Protein                        | At1g30890 | Integral Membrane HRF1 Family Protein                                                                       |
| OSJNBa0019G23.8  | Unknown Protein                        | At3g08980 | Signal Peptidase I Family Protein                                                                           |
| OSJNBa0019K04.15 | Unknown Protein                        | At5g62220 | Exostosin Family Protein                                                                                    |
| OSJNBa0019K04.19 | Unknown Protein                        | At1g01930 | Zinc Finger Protein-Related                                                                                 |
| OSJNBa0019K04.2  | Unknown Protein                        | At4g25480 | DREB1A (DEHYDRATION RESPONSE ELEMENT B1A); DNA Binding / Transcription Factor/<br>Transcriptional Activator |
| OSJNBa0019K04.6  | Unknown Protein                        | At4g11810 | SPX (SYG1/Pho81/XPR1) Domain-Containing Protein                                                             |
| OSJNBa0019K04.7  | Unknown Protein                        | At1g12570 | Glucose-Methanol-Choline (GMC) Oxidoreductase Family Protein                                                |
| OSJNBa0019K04.9  | Unknown Protein                        | At5g51750 | Subtilase Family Protein                                                                                    |
| OSJNBa0020E23.9  | Unknown Protein                        | At5g02910 | F-Box Family Protein                                                                                        |
| OSJNBa0020H02.1  | Putative Heat Shock Protein            | At5g15450 | APG6/CLPB-P/CLPB3 (ALBINO AND PALE GREEN 6); ATP Binding / Atpase                                           |
| OSJNBa0020H14.13 | Putative Plastid Division Protein Ftsz | At3g52750 | FTSZ2-2 (Ftsz2-2); Structural Molecule                                                                      |
| OSJNBa0020H14.6  | Putative Myb-Like Transcription Factor | At4g09450 | Myb Family Transcription Factor                                                                             |
| OSJNBa0020I02.14 | Unknown Protein                        | At1g09770 | ATCDC5 (Arabidopsis Thaliana Homolog Of Cdc5); DNA Binding / Transcription Factor                           |
| OSJNBa0020I02.8  | Unknown Protein                        | At5g51340 | Binding                                                                                                     |
| OSJNBa0020J04.12 | Unknown Protein                        | At5g41890 | GDSL-Motif Lipase/Hydrolase Family Protein                                                                  |
| OSJNBa0020J04.13 | Unknown Protein                        | At5g17570 | Tatd-Related Deoxyribonuclease Family Protein                                                               |
| OSJNBa0020J04.7  | Unknown Protein                        | At2g16530 | 3-Oxo-5-Alpha-Steroid 4-Dehydrogenase Family Protein / Steroid 5-Alpha-Reductase Family<br>Protein          |
| OSJNBa0020J04.9  | Unknown Protein                        | At2g21270 | Ubiquitin Fusion Degradation UFD1 Family Protein                                                            |
| OSJNBa0020P07.11 | Unknown Protein                        | At1g01090 | PDH-E1 ALPHA (PYRUVATE DEHYDROGENASE E1 ALPHA); Pyruvate Dehydrogenase<br>(Acetyl-Transferring)             |
| OSJNBa0020P07.12 | Unknown Protein                        | At1g64720 | Cp5                                                                                                         |
| OSJNBa0020P07.16 | Unknown Protein                        | At3g29775 | Transposable Element Gene                                                                                   |
| OSJNBa0020P07.4  | Unknown Protein                        | At2g18040 | PIN1AT (Parvulin 1At)                                                                                       |
| OSJNBa0020P07.6  | Unknown Protein                        | At3g57430 | Pentatricopeptide (PPR) Repeat-Containing Protein                                                           |
| OSJNBa0022D10.11 | Unknown Protein                        | At2g42490 | Copper Amine Oxidase, Putative                                                                              |
| OSJNBa0022H21.12 | Unknown Protein                        | At1g14130 | 2-Oxoglutarate-Dependent Dioxygenase, Putative                                                              |
| OSJNBa0022H21.21 | Unknown Protein                        | At5g50170 | C2 Domain-Containing Protein / GRAM Domain-Containing Protein                                               |
| OSJNBa0022H21.3  | Unknown Protein                        | At5g42260 | Glycosyl Hydrolase Family 1 Protein                                                                         |

|                  |                                                 |           |                                                                                                            |
|------------------|-------------------------------------------------|-----------|------------------------------------------------------------------------------------------------------------|
| OSJNBa0022J22.7  | Putative Nucleoid DNA-Binding Protein           | At3g59080 | DNA Binding                                                                                                |
| OSJNBa0022J22.8  | Putative Ubiquitin                              | At2g46500 | Phosphatidylinositol 3- And 4-Kinase Family Protein / Ubiquitin Family Protein                             |
| OSJNBa0023I13.30 | Unknown Protein                                 | At1g16080 | Unknown Protein                                                                                            |
| OSJNBa0023I17.12 | Putative Receptor Protein Kinase PERK           | At3g14840 | Leucine-Rich Repeat Family Protein / Protein Kinase Family Protein                                         |
| OSJNBa0023I17.4  | Putative Pentatricopeptide (PPR)                | At2g36730 | Pentatricopeptide (PPR) Repeat-Containing Protein                                                          |
| OSJNBa0023I17.7  | Unknown Protein                                 | At1g50670 | OTU-Like Cysteine Protease Family Protein                                                                  |
| OSJNBa0023I19.10 | Putative Purple Acid Phosphatase                | At1g14700 | ATPAP3/PAP3 (Purple Acid Phosphatase 3)                                                                    |
| OSJNBa0023J03.8  | Unknown Protein                                 | At1g71100 | RSW10 (RADIAL SWELLING 10); Ribose-5-Phosphate Isomerase                                                   |
| OSJNBa0024F18.3  | Putative NAC-Domain Protein                     | At4g35580 | No Apical Meristem (NAM) Family Protein                                                                    |
| OSJNBa0024J22.1  | Unknown Protein                                 | At1g79940 | Heat Shock Protein Binding / Unfolded Protein Binding                                                      |
| OSJNBa0024K17.10 | Putative Translation Elongation Factor          | At3g22980 | Elongation Factor Tu Family Protein                                                                        |
| OSJNBa0024K17.17 | Expressed Protein                               | At5g17830 | Unknown Protein                                                                                            |
| OSJNBa0025J22.1  | Putative Multiple Stress-Responsive Zinc-Finger | At4g22820 | Zinc Finger (AN1-Like) Family Protein                                                                      |
| OSJNBa0025J22.10 | Putative 60S Ribosomal Protein L31              | At5g56710 | 60S Ribosomal Protein L31 (RPL31C)                                                                         |
| OSJNBa0025J22.21 | Putative DNA-Damage-Repair/Toleration Protein   | At3g12610 | DRT100 (DNA-DAMAGE REPAIR/TOLERATION 100); Protein Binding                                                 |
| OSJNBa0025J22.3  | Putative Protein Kinase (KIPK)                  | At4g26610 | Protein Kinase, Putative                                                                                   |
| OSJNBa0025J22.9  | Unknown Protein                                 | At3g57780 | Unknown Protein                                                                                            |
| OSJNBa0025P09.18 | Putative Cytokinin Dehydrogenase                | At2g41510 | ATCKX1/CKX1 (CYTOKININ OXIDASE/DEHYDROGENASE 1); Cytokinin Dehydrogenase                                   |
| OSJNBa0025P13.1  | Putative Protein Kinase                         | At4g08850 | Leucine-Rich Repeat Family Protein / Protein Kinase Family Protein                                         |
| OSJNBa0026A15.13 | Hypothetical Protein                            | At2g26680 | Unknown Protein                                                                                            |
| OSJNBa0026A15.3  | Putative Translation Initiation Factor          | At3g19760 | Eukaryotic Translation Initiation Factor 4A, Putative / Eif-4A, Putative / DEAD Box RNA Helicase, Putative |
| OSJNBa0026E05.10 | Putative UOS1                                   | At1g16720 | Oxidoreductase/ Transcriptional Repressor                                                                  |
| OSJNBa0026E05.30 | Putative Calcium Exchanger (CAX2)               | At1g55730 | ATCAX5 (Calcium Exchanger 5); Cation:Cation Antiporter                                                     |
| OSJNBa0026E05.33 | Unknown Protein                                 | At5g58110 | Unknown Protein                                                                                            |
| OSJNBa0026E05.37 | Putative Beta-1,3-Glucanase                     | At5g58090 | Glycosyl Hydrolase Family 17 Protein                                                                       |
| OSJNBa0026J14.20 | Pectate Lyase-Like Protein                      | At3g55140 | Pectate Lyase Family Protein                                                                               |
| OSJNBa0026L12.2  | Putative Cytochrome P450                        | At1g64950 | CYP89A5 (Cytochrome P450, Family 87, Subfamily A, Polypeptide 5); Oxygen Binding                           |
| OSJNBa0026L12.23 | Putative Nodulin-26                             | At4g10380 | NIP5;1/NLM6/NLM8 (NOD26-Like Intrinsic Protein 5;1); Boron Transporter/ Water Channel                      |
| OSJNBa0026L12.31 | Putative Non-LTR Retroelement Reverse           | At2g45230 | Transposable Element Gene                                                                                  |
| OSJNBa0026L12.5  | Putative Cytochrome P450                        | At1g64900 | CYP89A2 (CYTOCHROME P450 89A2); Oxygen Binding                                                             |
| OSJNBa0026O12.11 | Putative Esterase                               | At5g62930 | GDSL-Motif Lipase/Hydrolase Family Protein                                                                 |
| OSJNBa0026O12.9  | Hypothetical Protein                            | At3g23300 | Dehydration-Responsive Protein-Related                                                                     |
| OSJNBa0027G07.7  | Unknown Protein                                 | At1g34580 | Monosaccharide Transporter, Putative                                                                       |
| OSJNBa0027H06.5  | Unknown Protein                                 | At3g14540 | Terpene Synthase/Cyclase Family Protein                                                                    |

|                   |                                                 |           |                                                                                                        |
|-------------------|-------------------------------------------------|-----------|--------------------------------------------------------------------------------------------------------|
| OSJNBa0027H09.13  | Unknown Protein                                 | At1g04610 | Flavin-Containing Monooxygenase / FMO (YUCCA3)                                                         |
| OSJNBa0027H16.15  | Hypothetical Protein                            | At3g60150 | Unknown Protein                                                                                        |
| OSJNBa0027L23.3   | Putative Plastid-Lipid Associated Protein       | At2g35490 | Plastid-Lipid Associated Protein PAP, Putative                                                         |
| OSJNBa0027L23.4   | Unknown Protein                                 | At3g18410 | NADH-Ubiquinone Oxidoreductase-Related                                                                 |
| OSJNBa0027L23.5   | Putative Inositol 1,3,4-Trisphosphate           | At5g16760 | Inositol 1,3,4-Trisphosphate 5/6-Kinase                                                                |
| OSJNBa0027L23.9   | Unknown Protein                                 | At1g65020 | Unknown Protein                                                                                        |
| OSJNBa0027N13.142 | Unknown Protein                                 | At2g32380 | Unknown Protein                                                                                        |
| OSJNBa0027O01.6   | Unknown Protein                                 | At4g14420 | Lesion Inducing Protein-Related                                                                        |
| OSJNBa0027P08.12  | Unknown Protein                                 | At1g65010 | Unknown Protein                                                                                        |
| OSJNBa0027P08.14  | Unknown Protein                                 | At5g46290 | KAS I (3-KETOACYL-ACYL CARRIER PROTEIN SYNTHASE I); Fatty-Acid Synthase                                |
| OSJNBa0027P08.15  | Unknown Protein                                 | At1g19120 | Small Nuclear Ribonucleoprotein, Putative / Snrnp, Putative / Sm Protein, Putative                     |
| OSJNBa0027P08.6   | Unknown Protein                                 | At5g49740 | ATFRO7/FRO7 (FERRIC REDUCTION OXIDASE 7); Ferric-Chelate Reductase/<br>Oxidoreductase                  |
| OSJNBa0027P08.7   | Unknown Protein                                 | At2g02470 | PHD Finger Family Protein                                                                              |
| OSJNBa0027P08.8   | Unknown Protein                                 | At3g02850 | SKOR (Stelar K+ Outward Rectifier); Cyclic Nucleotide Binding / Outward Rectifier Potassium<br>Channel |
| OSJNBa0027P10.1   | Putative Palmitoyl-Protein Thioesterase         | At3g60340 | Palmitoyl Protein Thioesterase Family Protein                                                          |
| OSJNBa0027P10.10  | Putative Ribosomal Protein L27                  | At4g15000 | 60S Ribosomal Protein L27 (RPL27C)                                                                     |
| OSJNBa0027P10.11  | Putative Arm Repeat Protein                     | At2g44900 | Armadillo/Beta-Catenin Repeat Family Protein / F-Box Family Protein                                    |
| OSJNBa0027P10.14  | Putative WD-40 Protein                          | At5g07590 | WD-40 Repeat Protein Family                                                                            |
| OSJNBa0027P10.16  | Hypothetical Protein                            | At2g44740 | CYCP4;1 (Cyclin P4;1); Cyclin-Dependent Protein Kinase                                                 |
| OSJNBa0027P10.3   | Putative Peptide Methionine Sulfoxide Reductase | At4g25130 | Peptide Methionine Sulfoxide Reductase, Putative                                                       |
| OSJNBa0027P10.4   | Putative Nucleoside Diphosphate Kinase          | At4g09320 | NDPK1 (Nucleoside Diphosphate Kinase 1); ATP Binding / Nucleoside Diphosphate Kinase                   |
| OSJNBa0027P10.5   | Putative Nucleic Acid Binding Protein           | At4g26000 | PEP (PEPPER); Nucleic Acid Binding                                                                     |
| OSJNBa0027P10.8   | Putative Casein Kinase II Beta Subunit          | At2g44680 | CKB4 (CASEIN KINASE II BETA SUBUNIT 4); Protein Kinase CK2 Regulator                                   |
| OSJNBa0028I23.19  | Unknown Protein                                 | At1g43690 | Ubiquitin Interaction Motif-Containing Protein                                                         |
| OSJNBa0028I23.24  | Unknown Protein                                 | At5g45370 | Nodulin-Related / Integral Membrane Family Protein                                                     |
| OSJNBa0029C04.10  | Unknown Protein                                 | At2g13000 | Transposable Element Gene                                                                              |
| OSJNBa0029C15.2   | Putative Thioredoxin-Like U5 Small              | At5g08290 | YLS8 (Yellow-Leaf-Specific Gene 8); Catalytic                                                          |
| OSJNBa0029C15.3   | Putative Cytochrome P450 Protein                | At5g23190 | CYP86B1 (Cytochrome P450, Family 86, Subfamily B, Polypeptide 1); Oxygen Binding                       |
| OSJNBa0029C15.7   | Anther-Specific Protein YY2                     | At1g02050 | Chalcone And Stilbene Synthase Family Protein                                                          |
| OSJNBa0029H02.14  | Unknown Protein                                 | At5g48930 | Transferase Family Protein                                                                             |
| OSJNBa0029H02.16  | Unknown Protein                                 | At3g55280 | 60S Ribosomal Protein L23A (RPL23aB)                                                                   |
| OSJNBa0029H02.19  | Unknown Protein                                 | At2g24240 | Potassium Channel Tetramerisation Domain-Containing Protein                                            |
| OSJNBa0029H02.21  | Unknown Protein                                 | At5g17410 | Tubulin Family Protein                                                                                 |
| OSJNBa0029H02.22  | Unknown Protein                                 | At2g24290 | Unknown Protein                                                                                        |

|                   |                                                 |           |                                                                                                       |
|-------------------|-------------------------------------------------|-----------|-------------------------------------------------------------------------------------------------------|
| OSJNBa0029H02.25  | Unknown Protein                                 | At5g11040 | Unknown Protein                                                                                       |
| OSJNBa0029H02.4   | Unknown Protein                                 | At2g03670 | CDC48B; Atpase                                                                                        |
| OSJNBa0029H02.6   | Unknown Protein                                 | At5g25050 | Integral Membrane Transporter Family Protein                                                          |
| OSJNBa0029P06.15  | Putative Alpha-Mannosidase                      | At5g66150 | Glycosyl Hydrolase Family 38 Protein                                                                  |
| OSJNBa0029P16.14  | Putative Proton Pump                            | At2g21410 | (VACUOLAR PROTON ATPASE A2); Atpase                                                                   |
| OSJNBa0030G18.4   | SWP1 Protein-Like                               | At3g04740 | Swp (Struwwelpeeter)                                                                                  |
| OSJNBa0030I14.5   | Putative Early-Responsive To Dehydration Stress | At3g21620 | Early-Responsive To Dehydration Protein-Related / ERD Protein-Related                                 |
| OSJNBa0030I14.9   | UDP-Glucose 4-Epimerase                         | At4g23920 | UGE2 (UDP-D-Glucose/UDP-D-Galactose 4-Epimerase 2); UDP-Glucose 4-Epimerase/ Protein Dimerization     |
| OSJNBa0030J19.9   | Putative Ribosomal Protein L27a                 | At1g70600 | 60S Ribosomal Protein L27A (RPL27aC)                                                                  |
| OSJNBa0030M21.36  | Eukaryotic Translation Initiation Factor 1A     | At2g04520 | Eukaryotic Translation Initiation Factor 1A, Putative / Eif-1A, Putative / Eif-4C, Putative           |
| OSJNBa0030M21.4   | Putative Lectin-Like Receptor Kinase 7          | At5g01550 | Lectin Protein Kinase, Putative                                                                       |
| OSJNBa0031C24.124 | Putative Cytochrome P450                        | At3g53280 | CYP71B5 (CYTOCHROME P450 71B5); Oxygen Binding                                                        |
| OSJNBa0031C24.143 | Putative Cytochrome P450                        | At5g25140 | CYP71B13 (Cytochrome P450, Family 71, Subfamily B, Polypeptide 13); Oxygen Binding                    |
| OSJNBa0031I04.2   | Putative Calcineurin                            | At1g64480 | Cbl8 (Calcineurin B-Like Protein 5)                                                                   |
| OSJNBa0031O09.02  | Predicted Protein                               | At5g43950 | Unknown Protein                                                                                       |
| OSJNBa0031O09.03  | Similar To Histone 2A Domain                    | At1g54690 | Histone H2A, Putative                                                                                 |
| OSJNBa0031O09.05  | Putative Myb/Myb-Related Protein                | At4g33450 | Atmyb69 (Myb Domain Protein 69); DNA Binding / Transcription Factor                                   |
| OSJNBa0032B23.5   | Unknown Protein                                 | At5g51660 | Cleavage And Polyadenylation Specificity Factor (CPSF) A Subunit C-Terminal Domain-Containing Protein |
| OSJNBa0032F06.12  | Unknown Protein                                 | At5g53470 | Acbp1 (Acyl-Coa Binding Protein)                                                                      |
| OSJNBa0032F06.13  | Unknown Protein                                 | At3g59950 | Autophagy 4b (APG4b)                                                                                  |
| OSJNBa0032F06.14  | Unknown Protein                                 | At5g18400 | Unknown Protein                                                                                       |
| OSJNBa0032F06.15  | Unknown Protein                                 | At1g63220 | C2 Domain-Containing Protein                                                                          |
| OSJNBa0032F06.16  | Unknown Protein                                 | At2g45790 | Eukaryotic Phosphomannomutase Family Protein                                                          |
| OSJNBa0032F06.7   | Unknown Protein                                 | At4g27780 | Acbp2 (Acyl-Coa Binding Protein Acbp 2)                                                               |
| OSJNBa0032G08.1   | Putative Dihydroflavonol-4-Reductase            | At4g33360 | Terpene Cyclase/Mutase-Related                                                                        |
| OSJNBa0032G08.17  | Unknown Protein                                 | At4g33250 | EIF3K (Eukaryotic Translation Initiation Factor 3K)                                                   |
| OSJNBa0032G08.18  | Putative 40S Ribosomal Protein                  | At3g04770 | RPSAB (40S Ribosomal Protein SA B); Structural Constituent Of Ribosome                                |
| OSJNBa0032G08.3   | Putative Protein With Similarity To Putative    | At3g19230 | Leucine-Rich Repeat Family Protein                                                                    |
| OSJNBa0032G08.4   | Putative Glycogenin                             | At1g54940 | Glycogenin Glucosyltransferase (Glycogenin)-Related                                                   |
| OSJNBa0032G08.6   | Putative Plasma Membrane Proton Atpase          | At1g17260 | AHA10 (AUTOINHIBITED H(+)-ATPASE ISOFORM 10); Atpase                                                  |
| OSJNBa0032G08.7   | Putative Leucine-Rich Repeat Transmembrane      | At1g53730 | Leucine-Rich Repeat Transmembrane Protein Kinase, Putative                                            |
| OSJNBa0032G11.10  | Putative Methyl Chloride Transferase            | At2g43910 | Thiol Methyltransferase, Putative                                                                     |
| OSJNBa0032G11.11  | Putative Poly(ADP-Ribose) Glycohydrolase        | At2g31870 | Tej (Sanskrit For 'Bright')                                                                           |
| OSJNBa0032G11.13  | Putative Protein Kinase                         | At3g59350 | Kinase                                                                                                |



|                  |                                                |           |                                                                                                                  |
|------------------|------------------------------------------------|-----------|------------------------------------------------------------------------------------------------------------------|
| OSJNBa0032G11.16 | Putative B' Regulatory Subunit Of Protein      | At3g26020 | Protein Phosphatase Type 2A Regulator                                                                            |
| OSJNBa0032G11.17 | Putative GDSL-Like Lipase/Acylhydrolase        | At3g48460 | GDSL-Motif Lipase/Hydrolase Family Protein                                                                       |
| OSJNBa0032G11.2  | Putative Oxidoreductase                        | At4g10020 | Short-Chain Dehydrogenase/Reductase (SDR) Family Protein                                                         |
| OSJNBa0032G11.22 | Putative Pirin-Like Protein                    | At1g50590 | Pirin, Putative                                                                                                  |
| OSJNBa0032G11.28 | Putative AMP-Binding Protein                   | At4g14070 | AAE15 (ACYL-ACTIVATING ENZYME 15); Acyl-ACP Synthetase                                                           |
| OSJNBa0032G11.5  | Putative Late Embryogenesis Abundant Protein   | At2g44060 | Late Embryogenesis Abundant Family Protein / LEA Family Protein                                                  |
| OSJNBa0032H19.14 | Unknown Protein                                | At2g05640 | Transposable Element Gene                                                                                        |
| OSJNBa0032H19.2  | Unknown Protein                                | At2g31890 | Protein Contains Putative RNA Binding Domain.                                                                    |
| OSJNBa0032H19.22 | Putative Stearoyl-Acyl-Carrier Protein         | At5g16230 | Acyl-(Acyl-Carrier-Protein) Desaturase, Putative / Stearoyl-ACP Desaturase, Putative                             |
| OSJNBa0032H19.25 | Hypothetical Protein                           | At5g39250 | F-Box Family Protein                                                                                             |
| OSJNBa0032H19.8  | Putative Ribosomal Protein S19                 | At5g61170 | 40S Ribosomal Protein S19 (RPS19C)                                                                               |
| OSJNBa0032I19.1  | Unknown Protein                                | At1g10810 | Aldo/Keto Reductase Family Protein                                                                               |
| OSJNBa0032I19.2  | Unknown Protein                                | At1g60690 | Aldo/Keto Reductase Family Protein                                                                               |
| OSJNBa0032N04.1  | Hypothetical Protein                           | At5g63560 | Transferase Family Protein                                                                                       |
| OSJNBa0033G05.14 | Unknown Protein                                | At2g12550 | Ubiquitin-Associated (UBA)/TS-N Domain-Containing Protein                                                        |
| OSJNBa0033G05.20 | Unknown Protein                                | At5g33280 | Chloride Channel-Like (CLC) Protein, Putative                                                                    |
| OSJNBa0033G05.7  | Unknown Protein                                | At4g30560 | ATCNGC9 (CYCLIC NUCLEOTIDE GATED CHANNEL 9); Calmodulin Binding / Cyclic Nucleotide Binding / Ion Channel        |
| OSJNBa0033G05.8  | Unknown Protein                                | At1g80550 | Pentatricopeptide (PPR) Repeat-Containing Protein                                                                |
| OSJNBa0033G16.4  | Unknown Protein                                | At3g44220 | Harpin-Induced Family Protein / HIN1 Family Protein / Harpin-Responsive Family Protein                           |
| OSJNBa0033G16.6  | Unknown Protein                                | At3g11680 | Unknown Protein                                                                                                  |
| OSJNBa0033H08.6  | Unknown Protein                                | At1g62940 | 4-Coumarate--Coa Ligase Family Protein / 4-Coumaroyl-Coa Synthase Family Protein                                 |
| OSJNBa0033P04.2  | Putative Rubisco Subunit Binding-Protein Alpha | At2g28000 | CPN60A (Chloroplast / 60 Kda Chaperonin Alpha Subunit); ATP Binding / Protein Binding / Unfolded Protein Binding |
| OSJNBa0033P04.20 | Putative DNA Binding Protein                   | At3g23240 | ATERF1/ERF1 (ETHYLENE RESPONSE FACTOR 1); DNA Binding / Transcription Factor/ Transcriptional Activator          |
| OSJNBa0033P04.26 | Putative Pentatricopeptide Repeat Containing   | At5g52850 | Pentatricopeptide (PPR) Repeat-Containing Protein                                                                |
| OSJNBa0034B05.21 | Putative Protein Kinase                        | At1g50700 | CPK33 (Calcium-Dependent Protein Kinase 33); Calcium- And Calmodulin-Dependent Protein Kinase/ Kinase            |
| OSJNBa0034B05.23 | Putative Synaptobrevin-Like Protein            | At5g22360 | ATVAMP714 (Vesicle-Associated Membrane Protein 714)                                                              |
| OSJNBa0034B05.25 | Putative Protein Kinase                        | At3g06030 | ANP3 (Arabidopsis NPK1-Related Protein Kinase 3); Kinase                                                         |
| OSJNBa0034D21.15 | Putative Antifungal Zeamatin-Like Protein      | At4g11650 | Atosm34 (Osmotin 34)                                                                                             |
| OSJNBa0034E08.23 | Putative Piwi Domain Containing Protein        | At1g69440 | Ago7 (Argonaute7)                                                                                                |
| OSJNBa0034E08.30 | Putative Mitotic Checkpoint Protein            | At1g49910 | WD-40 Repeat Family Protein / Mitotic Checkpoint Protein, Putative                                               |
| OSJNBa0035A24.10 | Prefoldin-Related KE2-Like                     | At3g52400 | SYP122 (Syntaxin 122); T-SNARE                                                                                   |
| OSJNBa0035A24.17 | Hypothetical Protein                           | At3g18440 | Unknown Protein                                                                                                  |
| OSJNBa0035A24.45 | RAD23 Protein-Like                             | At1g79650 | RAD23; Damaged DNA Binding                                                                                       |

|                  |                                                        |           |                                                                                                                                          |
|------------------|--------------------------------------------------------|-----------|------------------------------------------------------------------------------------------------------------------------------------------|
| OSJNBa0035A24.50 | Putative Sterol Delta-7 Reductase                      | At1g50430 | Dwf5 (Dwarf 5)                                                                                                                           |
| OSJNBa0035H01.10 | Putative Cellulose Synthase                            | At3g03050 | CSLD3 (CELLULOSE SYNTHASE-LIKE 3); Cellulose Synthase/ Transferase, Transferring Glycosyl Groups                                         |
| OSJNBa0035H01.8  | Putative Acyltransferase                               | At1g32200 | Ats1 (Acyltransferase 1)                                                                                                                 |
| OSJNBa0035I03.10 | Putative Inorganic Pyrophosphatase                     | At1g15690 | AVP1 (Vacuolar-Type H <sup>+</sup> -Pumping Pyrophosphatase 1)                                                                           |
| OSJNBa0035I03.11 | Unknown Protein                                        | At5g34940 | Glycosyl Hydrolase Family 79 N-Terminal Domain-Containing Protein                                                                        |
| OSJNBa0035I03.17 | Putative DNA-Binding Protein Phosphatase 2C            | At2g25620 | Protein Phosphatase 2C, Putative / PP2C, Putative                                                                                        |
| OSJNBa0035I03.35 | Putative Plasma Membrane H <sup>+</sup> -Atpase        | At3g42640 | AHA8 (ARABIDOPSIS H(+)-ATPASE 8); Atpase                                                                                                 |
| OSJNBa0035I24.3  | Expressed Protein                                      | At4g33700 | CBS Domain-Containing Protein                                                                                                            |
| OSJNBa0035M09.11 | Unknown Protein                                        | At2g15410 | Transposable Element Gene                                                                                                                |
| OSJNBa0035M09.16 | Unknown Protein                                        | At5g10620 | Unknown Protein                                                                                                                          |
| OSJNBa0035M09.17 | Unknown Protein                                        | At5g19940 | Plastid-Lipid Associated Protein PAP-Related / Fibrillin-Related                                                                         |
| OSJNBa0035M09.18 | Unknown Protein                                        | At4g25870 | Unknown Protein                                                                                                                          |
| OSJNBa0035M09.2  | Unknown Protein                                        | At5g57110 | ACA8 (AUTOINHIBITED CA <sup>2+</sup> -ATPASE, ISOFORM 8); Calmodulin Binding                                                             |
| OSJNBa0035M09.7  | Unknown Protein                                        | At1g51590 | Calcium Ion Binding / Mannosyl-Oligosaccharide 1,2-Alpha-Mannosidase                                                                     |
| OSJNBa0035O13.14 | Unknown Protein                                        | At3g62700 | ATMRP10 (Arabidopsis Thaliana Multidrug Resistance-Associated Protein 10)                                                                |
| OSJNBa0035O13.9  | Unknown Protein                                        | At5g45890 | SAG12 (SENESCENCE-ASSOCIATED GENE 12); Cysteine-Type Peptidase                                                                           |
| OSJNBa0036B21.10 | Unknown Protein                                        | At4g39640 | GGT1; Gamma-Glutamyltransferase                                                                                                          |
| OSJNBa0036B21.13 | Unknown Protein                                        | At1g34210 | SERK2 (SOMATIC EMBRYOGENESIS RECEPTOR-LIKE KINASE 2); Kinase                                                                             |
| OSJNBa0036B21.20 | Unknown Protein                                        | At5g27870 | Pectinesterase Family Protein                                                                                                            |
| OSJNBa0036B21.21 | Unknown Protein                                        | At3g28860 | ATMDR11/ATPGP19/MDR1/MDR11/PGP19 (P-GLYCOPROTEIN 19); Atpase, Coupled To Transmembrane Movement Of Substances / Auxin Efflux Transporter |
| OSJNBa0036B21.6  | Unknown Protein                                        | At1g15820 | LHCB6 (LIGHT HARVESTING COMPLEX PSII); Chlorophyll Binding                                                                               |
| OSJNBa0036D19.6  | Putative Senescence-Associated Protein 15              | At1g01120 | KCS1 (3-KETOACYL-COA SYNTHASE 1); Acyltransferase                                                                                        |
| OSJNBa0036E02.13 | Putative DNA-Binding Protein                           | At1g80270 | DNA-Binding Protein, Putative                                                                                                            |
| OSJNBa0036E02.23 | Putative Coatmer Beta Subunit (Beta-Coat               | At4g31480 | Coatmer Beta Subunit, Putative / Beta-Coat Protein, Putative / Beta-COP, Putative                                                        |
| OSJNBa0036E02.3  | Putative Na <sup>+</sup> -Dependen Inorganic Phosphate | At5g44370 | Transporter-Related                                                                                                                      |
| OSJNBa0036E02.4  | Putative Leucine-Rich Repeat Protein LRP               | At5g21090 | Leucine-Rich Repeat Protein, Putative                                                                                                    |
| OSJNBa0036E02.7  | Putative Transcription Factor HBP-1b - Wheat           | At5g06950 | AHBP-1B (Bzip Transcription Factor HBP-1b Homolog)                                                                                       |
| OSJNBa0036E17.10 | Cytosolic Pyruvate Orthophosphate Dikinase             | At4g15530 | Ppdk (Pyruvate Orthophosphate Dikinase)                                                                                                  |
| OSJNBa0036E17.12 | Expressed Protein                                      | At2g14680 | MEE13 (Maternal Effect Embryo Arrest 13)                                                                                                 |
| OSJNBa0038E22.11 | Putative Polyprotein                                   | At2g15100 | Transposable Element Gene                                                                                                                |
| OSJNBa0038F22.1  | Receptor Protein Kinase-Like                           | At2g21480 | Protein Kinase Family Protein                                                                                                            |
| OSJNBa0038F22.14 | Putative Isp4 Protein                                  | At4g10770 | ATOPT7 (Oligopeptide Transporter 7); Oligopeptide Transporter                                                                            |
| OSJNBa0038F22.17 | Putative Ribonucleoside-Diphosphate Reductase          | At3g27060 | TSO2 (TSO2); Ribonucleoside-Diphosphate Reductase                                                                                        |
| OSJNBa0038F22.20 | Unknown Protein                                        | At5g01460 | LMBR1 Integral Membrane Family Protein                                                                                                   |

|                   |                                                 |           |                                                                                            |
|-------------------|-------------------------------------------------|-----------|--------------------------------------------------------------------------------------------|
| OSJNBa0038J17.19  | Unknown Protein                                 | At5g45920 | Carboxylic Ester Hydrolase                                                                 |
| OSJNBa0038J17.26  | Unknown Protein                                 | At1g28590 | Lipase, Putative                                                                           |
| OSJNBa0038J17.27  | Hypothetical Protein                            | At1g15000 | SCPL50 (Serine Carboxypeptidase-Like 50); Serine Carboxypeptidase                          |
| OSJNBa0038O10.10  | Unknown Protein                                 | At5g64500 | Membrane Protein-Related                                                                   |
| OSJNBa0038O10.17  | Unknown Protein                                 | At5g08350 | GRAM Domain-Containing Protein / ABA-Responsive Protein-Related                            |
| OSJNBa0038O10.7   | Unknown Protein                                 | At5g23140 | CLPP2 (Clp Protease Proteolytic Subunit 2); Endopeptidase Clp                              |
| OSJNBa0038P21.6   | Unknown Protein                                 | At1g62670 | Pentatricopeptide (PPR) Repeat-Containing Protein                                          |
| OSJNBa0038P21.9   | Unknown Protein                                 | At5g14770 | Pentatricopeptide (PPR) Repeat-Containing Protein                                          |
| OSJNBa0039C07.14  | Unknown Protein                                 | At5g45880 | Pollen Ole E 1 Allergen And Extensin Family Protein                                        |
| OSJNBa0039C07.2   | Unknown Protein                                 | At1g28110 | SCPL45; Serine Carboxypeptidase                                                            |
| OSJNBa0039C07.3   | Unknown Protein                                 | At1g32210 | Atdad1 (Defender Against Apoptotic Death 1)                                                |
| OSJNBa0039C07.4   | Unknown Protein                                 | At5g50920 | CLPC (HEAT SHOCK PROTEIN 93-V); ATP Binding / Atpase                                       |
| OSJNBa0039G19.10  | Unknown Protein                                 | At1g21100 | O-Methyltransferase, Putative                                                              |
| OSJNBa0039K24.10  | Unknown Protein                                 | At5g14130 | Peroxidase, Putative                                                                       |
| OSJNBa0039K24.19  | Unknown Protein                                 | At1g49730 | Protein Kinase Family Protein                                                              |
| OSJNBa0039K24.21  | Unknown Protein                                 | At1g05970 | Nucleotide Binding                                                                         |
| OSJNBa0039K24.22  | Unknown Protein                                 | At1g75030 | ATLP-3 (Arabidopsis Thaumatin-Like Protein 3)                                              |
| OSJNBa0039K24.28  | Unknown Protein                                 | At1g44575 | Npq4 (Nonphotochemical Quenching)                                                          |
| OSJNBa0039K24.3   | Unknown Protein                                 | At1g18740 | Unknown Protein                                                                            |
| OSJNBa0039N21.16  | Putative Transposon Protein                     | At1g34660 | Transposable Element Gene                                                                  |
| OSJNBa0039N21.4   | Putative Glucose-6-Phosphate Dehydrogenase      | At5g35790 | G6PD1 (GLUCOSE-6-PHOSPHATE DEHYDROGENASE 1); Glucose-6-Phosphate 1-Dehydrogenase           |
| OSJNBa0039N21.9   | Putative Glycosyltransferase Protein            | At1g18580 | GAUT11 (Galacturonosyltransferase 11); Polygalacturonate 4-Alpha-Galacturonosyltransferase |
| OSJNBa0039O18.13  | Putative RNA Helicase                           | At5g60990 | DEAD/DEAH Box Helicase, Putative (RH10)                                                    |
| OSJNBa0039O18.8   | Putative Beta 1,3-Glucanase                     | At2g16230 | Glycosyl Hydrolase Family 17 Protein                                                       |
| OSJNBa0039O18.9   | Guanine Nucleotide-Binding Protein Beta Subunit | At4g34460 | Agb1 (Gtp Binding Protein Beta 1)                                                          |
| OSJNBa0040D17.13  | Unknown Protein                                 | At1g53390 | Atpase, Coupled To Transmembrane Movement Of Substances                                    |
| OSJNBa0040D23.4   | Putative Transmembrane Protein                  | At1g14530 | (TOM THREE HOMOLOG); Virion Binding                                                        |
| OSJNBa0040E01.14  | Putative Glucosyltransferase                    | At5g59590 | UDP-Glucuronosyl/UDP-Glucosyl Transferase Family Protein                                   |
| OSJNBa0040E01.26  | Putative Ankyrin                                | At2g03430 | Ankyrin Repeat Family Protein                                                              |
| OSJNBa0040E01.5   | Putative Glucosyltransferase                    | At3g02100 | UDP-Glucuronosyl/UDP-Glucosyl Transferase Family Protein                                   |
| OSJNBa0040E01.6   | Unknown Protein                                 | At5g07960 | Unknown Protein                                                                            |
| OSJNBa0040E01.8   | Putative UDP-Glucose Dehydrogenase              | At5g15490 | UDP-Glucose 6-Dehydrogenase, Putative                                                      |
| OSJNBa0040E17.10  | Hypothetical Protein                            | At2g14610 | Pr1 (Pathogenesis-Related Gene 1)                                                          |
| OSJNBa0040K22.111 | Putative UVB-Resistance Protein UVR8            | At3g15430 | Regulator Of Chromosome Condensation (RCC1) Family Protein                                 |

|                    |                                               |           |                                                                                                                |
|--------------------|-----------------------------------------------|-----------|----------------------------------------------------------------------------------------------------------------|
| OSJNBa0041A02.10   | Unknown Protein                               | At4g09010 | APX4 (ASCORBATE PEROXIDASE 4); Peroxidase                                                                      |
| OSJNBa0041A02.11   | Unknown Protein                               | At1g31410 | Putrescine-Binding Periplasmic Protein-Related                                                                 |
| OSJNBa0041A02.14   | Unknown Protein                               | At5g45280 | Pectinacetyltransferase, Putative                                                                              |
| OSJNBa0041A02.18   | Unknown Protein                               | At5g23320 | ATSTE14 (PRENYLCYSTEINE ALPHA-CARBOXYL METHYLTRANSFERASE 14A); Protein-S-Isoprenylcysteine O-Methyltransferase |
| OSJNBa0041A02.24   | Unknown Protein                               | At4g30160 | VLN4 (ARABIDOPSIS THALIANA VILLIN 4); Actin Binding                                                            |
| OSJNBa0041A02.25   | Unknown Protein                               | At5g57550 | XTR3 (XYLOGLUCAN ENDOTRANSGLYCOSYLASE 3); Hydrolase, Acting On Glycosyl Bonds                                  |
| OSJNBa0041A02.26   | Unknown Protein                               | At4g30270 | MER15B (MERISTEM-5); Hydrolase, Acting On Glycosyl Bonds                                                       |
| OSJNBa0041C07.40   | Putative Leucyl-Trna Synthetase               | At1g09620 | ATP Binding / Aminoacyl-Trna Ligase                                                                            |
| OSJNBa0041M21.2    | Unknown Protein                               | At1g73040 | Jacalin Lectin Family Protein                                                                                  |
| OSJNBa0041P03.12   | Putative Chloroplast RNA Processing Protein   | At1g64580 | Pentatricopeptide (PPR) Repeat-Containing Protein                                                              |
| OSJNBa0041P03.13   | Putative Chloroplast RNA Processing Protein   | At1g12300 | Pentatricopeptide (PPR) Repeat-Containing Protein                                                              |
| OSJNBa0041P03.2    | Putative Signal Transduction Protein          | At1g15130 | Hydroxyproline-Rich Glycoprotein Family Protein                                                                |
| OSJNBa0041P03.4    | Putative ABC Transporter                      | At1g17840 | ABC Transporter Family Protein                                                                                 |
| OSJNBa0041P03.5    | Unknown Protein                               | At4g03420 | Unknown Protein                                                                                                |
| OSJNBa0042E19.39   | Putative Chloroplast RNA Processing Protein   | At3g04260 | PTAC3 (PLASTID TRANSCRIPTIONALLY ACTIVE3); DNA Binding                                                         |
| OSJNBa0042E19.4    | Putative Oxygen Evolving Complex Protein      | At3g55330 | Photosystem II Reaction Center Psbp Family Protein                                                             |
| OSJNBa0042F15.2    | Unknown Protein                               | At5g11560 | Catalytic                                                                                                      |
| OSJNBa0042F21.13   | Unknown Protein                               | At3g55800 | SBPASE (Sedoheptulose-Bisphosphatase); Phosphoric Ester Hydrolase                                              |
| OSJNBa0042H09.16   | Hypothetical Protein                          | At2g45010 | Unknown Protein                                                                                                |
| OSJNBa0042H24.55-1 | Serine/Threonine-Specific Receptor Protein    | At4g29990 | Light Repressible Receptor Protein Kinase                                                                      |
| OSJNBa0042H24.55-2 | Leucine-Rich Repeat Protein Kinase-Like       | At1g51860 | Leucine-Rich Repeat Protein Kinase, Putative                                                                   |
| OSJNBa0042H24.8-2  | Bystin (51.6 Kd)-Like                         | At1g31660 | Unknown Protein                                                                                                |
| OSJNBa0042I09.17   | Putative Receptor-Like Protein Kinase         | At1g34300 | Lectin Protein Kinase Family Protein                                                                           |
| OSJNBa0042I09.24   | Putative Nicotinate Phosphoribosyltransferase | At2g23420 | Nicotinate Phosphoribosyltransferase Family Protein / Naprtase Family Protein                                  |
| OSJNBa0042I09.26   | Cellulose Synthase                            | At4g39350 | CESA2 (CELLULOSE SYNTHASE 2); Cellulose Synthase/ Transferase, Transferring Glycosyl Groups                    |
| OSJNBa0042I09.9    | Putative Oxygenase                            | At3g24200 | Monooxygenase                                                                                                  |
| OSJNBa0042I15.10   | Unknown Protein                               | At1g08250 | Prephenate Dehydratase Family Protein                                                                          |
| OSJNBa0042I15.17   | Unknown Protein                               | At3g09970 | Calcineurin-Like Phosphoesterase Family Protein                                                                |
| OSJNBa0042I15.19   | Unknown Protein                               | At5g22510 | Beta-Fructofuranosidase, Putative / Invertase, Putative / Saccharase, Putative / Beta-Fructosidase, Putative   |
| OSJNBa0042I15.9    | Unknown Protein                               | At5g04660 | CYP77A4 (Cytochrome P450, Family 77, Subfamily A, Polypeptide 4); Oxygen Binding                               |
| OSJNBa0042L16.13   | Unknown Protein                               | At4g36940 | Nicotinate Phosphoribosyltransferase                                                                           |
| OSJNBa0042L16.16   | Unknown Protein                               | At1g49740 | Phospholipase C                                                                                                |
| OSJNBa0042L16.3    | Unknown Protein                               | At4g14110 | Cop9 (Constitutive Photomorphogenic 9)                                                                         |

|                    |                                            |           |                                                                               |
|--------------------|--------------------------------------------|-----------|-------------------------------------------------------------------------------|
| OSJNBa0042P21.23   | Putative Protein Kinase                    | At1g70520 | Protein Kinase Family Protein                                                 |
| OSJNBa0042P21.27   | Putative Polygalacturonase                 | At3g26610 | Polygalacturonase, Putative / Pectinase, Putative                             |
| OSJNBa0043A12.13   | Unknown Protein                            | At5g15710 | F-Box Family Protein                                                          |
| OSJNBa0043A12.14   | Unknown Protein                            | At1g13640 | Phosphatidylinositol 3- And 4-Kinase Family Protein                           |
| OSJNBa0043A12.21   | Unknown Protein                            | At4g22300 | Carboxylic Ester Hydrolase                                                    |
| OSJNBa0043A12.24   | Unknown Protein                            | At1g49820 | ATMTK; S-Methyl-5-Thioribose Kinase                                           |
| OSJNBa0043A12.26   | Unknown Protein                            | At3g19460 | Reticulon Family Protein (RTNLB11)                                            |
| OSJNBa0043A12.28   | Unknown Protein                            | At5g43060 | Cysteine Proteinase, Putative / Thiol Protease, Putative                      |
| OSJNBa0043A12.35   | Unknown Protein                            | At1g34270 | Exostosin Family Protein                                                      |
| OSJNBa0043A12.38   | Unknown Protein                            | At2g37250 | ADK/ATPADK1 (ADENOSINE KINASE); Nucleotide Kinase                             |
| OSJNBa0043A12.5    | Unknown Protein                            | At5g56180 | ATARP8 (ACTIN-RELATED PROTEIN 8); Structural Constituent Of Cytoskeleton      |
| OSJNBa0043A12.6    | Unknown Protein                            | At5g53300 | UBC10 (Ubiquitin-Conjugating Enzyme 10); Ubiquitin-Protein Ligase             |
| OSJNBa0043L09.15   | Unknown Protein                            | At2g20900 | Diacylglycerol Kinase                                                         |
| OSJNBa0043L09.27   | Unknown Protein                            | At5g13780 | GCN5-Related N-Acetyltransferase, Putative                                    |
| OSJNBa0043L09.28   | Unknown Protein                            | At5g54260 | MRE11 (MEIOTIC RECOMBINATION 11); Protein Serine/Threonine Phosphatase        |
| OSJNBa0043L24.12   | Unknown Protein                            | At1g23360 | Ubie/COQ5 Methyltransferase Family Protein                                    |
| OSJNBa0043L24.16   | Unknown Protein                            | At5g14590 | Isocitrate Dehydrogenase, Putative / NADP+ Isocitrate Dehydrogenase, Putative |
| OSJNBa0043L24.17   | Unknown Protein                            | At5g40370 | Glutaredoxin, Putative                                                        |
| OSJNBa0043L24.22   | Unknown Protein                            | At2g38970 | Zinc Finger (C3HC4-Type RING Finger) Family Protein                           |
| OSJNBa0043L24.23   | Unknown Protein                            | At1g05055 | Member Of Transcription Factor TFIIF Complex                                  |
| OSJNBa0043L24.4    | Unknown Protein                            | At3g24320 | CHM (CHLOROPLAST MUTATOR); ATP Binding / Damaged DNA Binding                  |
| OSJNBa0044A10.21   | Putative Oxidoreductase                    | At4g09670 | Oxidoreductase Family Protein                                                 |
| OSJNBa0044E16.22   | Carboxyl-Terminal Peptidase-Like           | At5g18460 | Hypothetical Protein                                                          |
| OSJNBa0044E16.26   | Pfkb Type Carbohydrate Kinase Protein      | At5g43910 | Pfkb-Type Carbohydrate Kinase Family Protein                                  |
| OSJNBa0044E16.36   | Type 1 Membrane Protein -Like              | At3g24160 | Pmp (Putative Type 1 Membrane Protein)                                        |
| OSJNBa0044K18.7    | Unknown Protein                            | At3g27540 | Glycosyl Transferase Family 17 Protein                                        |
| OSJNBa0044M19.10   | Unknown Protein                            | At1g27990 | Unknown Protein                                                               |
| OSJNBa0045C13.16   | Putative Vacuolar Sorting Receptor Protein | At2g14740 | Vacuolar Sorting Receptor, Putative                                           |
| OSJNBa0045O17.6    | Unknown Protein                            | At3g29732 | Transposable Element Gene                                                     |
| OSJNBa0047A17.12-1 | Unknown Protein                            | At2g29590 | Thioesterase Family Protein                                                   |
| OSJNBa0047A17.6    | Putative Copine III                        | At5g07300 | Bon2 (Bonzai 2)                                                               |
| OSJNBa0047E24.13   | Putative Ribosomal Protein L6              | At1g05190 | EMB2394 (EMBRYO DEFECTIVE 2394); Structural Constituent Of Ribosome           |
| OSJNBa0047E24.17   | Putative Oligopeptide Transporter Protein  | At4g16370 | ATOPT3 (OLIGOPEPTIDE TRANSPORTER); Oligopeptide Transporter                   |
| OSJNBa0047E24.19   | Expressed Protein                          | At2g04900 | Unknown Protein                                                               |
| OSJNBa0047E24.21   | Putative Transcriptional Adaptor           | At3g07740 | ADA2A (Arabidopsis Adaptor 2A Homolog)                                        |

|                    |                                               |           |                                                                                                                                                        |
|--------------------|-----------------------------------------------|-----------|--------------------------------------------------------------------------------------------------------------------------------------------------------|
| OSJNBa0047E24.27   | Putative Stress-Related Protein               | At3g11930 | Universal Stress Protein (USP) Family Protein                                                                                                          |
| OSJNBa0047E24.7    | Putative Potassium Channel Protein            | At5g55630 | KCO1 (CA2+ ACTIVATED OUTWARD RECTIFYING K+ CHANNEL 1); Calcium-Activated Potassium Channel/ Outward Rectifier Potassium Channel                        |
| OSJNBa0047E24.9    | Phytochrome C                                 | At5g35840 | Phyc (Phytochrome Defective C)                                                                                                                         |
| OSJNBa0047G15.10   | Hypothetical Protein                          | At3g07510 | Unknown Protein                                                                                                                                        |
| OSJNBa0048A13.16   | Putative Zinc-Finger Motif                    | At4g39100 | Shl1 (Short Life)                                                                                                                                      |
| OSJNBa0048A13.17   | Unknown Protein                               | At5g38880 | Unknown Protein                                                                                                                                        |
| OSJNBa0048K16.23   | Putative UDP-Glycosyltransferase              | At1g22400 | UGT85A1 (UDP-Glucosyl Transferase 85A1); UDP-Glycosyltransferase/ Transferase, Transferring Glycosyl Groups / Transferase, Transferring Hexosyl Groups |
| OSJNBa0049O12.19   | Proliferating Cell Nuclear Antigen (PCNA)     | At2g29570 | PCNA2 (PROLIFERATING CELL NUCLEAR 2); DNA Binding / DNA Polymerase Processivity Factor                                                                 |
| OSJNBa0049O12.2    | Putative Starch Synthase                      | At4g18240 | Starch Synthase-Related Protein                                                                                                                        |
| OSJNBa0049O12.9    | Hypothetical Protein                          | At5g60700 | Glycosyltransferase Family Protein 2                                                                                                                   |
| OSJNBa0050E08.8    | Putative Alcohol Dehydrogenase                | At1g64710 | Oxidoreductase/ Zinc Ion Binding                                                                                                                       |
| OSJNBa0050F10.19   | Putative Gibberellin 20-Dioxygenase           | At5g51810 | ATGA20OX2/GA20OX2 (Gibberellin 20 Oxidase 2); Gibberellin 20-Oxidase                                                                                   |
| OSJNBa0050F10.25   | Putative Branched-Chain Alpha-Keto Acid       | At1g55510 | BCDH BETA1 (BRANCHED-CHAIN ALPHA-KETO ACID DECARBOXYLASE E1 BETA SUBUNIT); 3-Methyl-2-Oxobutanoate Dehydrogenase (2-Methylpropanoyl-Transferring)      |
| OSJNBa0050F10.39-1 | Putative SHOOT1 Protein                       | At1g55480 | Binding / Protein Binding                                                                                                                              |
| OSJNBa0050F10.4    | Putative Polynucleotide Phosphorylase         | At3g03710 | RIF10 (RESISTANT TO INHIBITION WITH FSM 10); 3'-5'-Exoribonuclease/ RNA Binding / Nucleic Acid Binding                                                 |
| OSJNBa0050F10.40   | Galactose-1-Phosphate Uridyltransferase-Like  | At5g18200 | UDP-Glucose:Hexose-1-Phosphate Uridyltransferase                                                                                                       |
| OSJNBa0050H14.4    | Hypothetical Protein                          | At1g72620 | Hydrolase, Alpha/Beta Fold Family Protein                                                                                                              |
| OSJNBa0050H14.9    | Hypothetical Protein                          | At1g10460 | GLP7 (GERMIN-LIKE PROTEIN 7); Manganese Ion Binding / Metal Ion Binding / Nutrient Reservoir                                                           |
| OSJNBa0050N08.15   | Putative Methionyl-Trna Synthetase            | At4g13780 | Methionine--Trna Ligase, Putative / Methionyl-Trna Synthetase, Putative / Metrs, Putative                                                              |
| OSJNBa0050N08.17   | Putative Selenium-Binding Protein-Like        | At2g22410 | Pentatricopeptide (PPR) Repeat-Containing Protein                                                                                                      |
| OSJNBa0051D19.17   | Putative Tam3-Transposase                     | At1g42110 | Transposable Element Gene; Hat-Like Transposase Family (Hobo/Ac/Tam3),                                                                                 |
| OSJNBa0051D19.18   | Putative Alpha-Galactosidase                  | At5g08380 | ATAGAL1 (ARABIDOPSIS THALIANA ALPHA-GALACTOSIDASE 1); Alpha-Galactosidase                                                                              |
| OSJNBa0051D19.19   | Putative Beta-Tonoplast Intrinsic Protein     | At1g17810 | BETA-TIP (BETA-TONOPLAST INTRINSIC PROTEIN); Water Channel                                                                                             |
| OSJNBa0051D19.25   | Putative Basic Secretory Protein              | At2g15220 | Secretory Protein, Putative                                                                                                                            |
| OSJNBa0051D19.7    | Putative Chloroplast Inner Envelope Protein   | At1g06950 | Attic110/Tic110 (Translocon At The Inner Envelope Membrane Of Chloroplasts 110)                                                                        |
| OSJNBa0051H17.18   | Putative Cdc21 Protein                        | At2g16440 | DNA Replication Licensing Factor, Putative                                                                                                             |
| OSJNBa0051J07.8    | Putative Nodulin Protein                      | At1g21890 | Nodulin Mtn21 Family Protein                                                                                                                           |
| OSJNBa0052F07.1    | Putative Vacuolar Sorting-Associated Protein, | At2g17790 | Hypothetical Protein                                                                                                                                   |
| OSJNBa0052F07.11   | Putative Argonaute Protein                    | At2g27880 | Argonaute Protein, Putative / AGO, Putative                                                                                                            |
| OSJNBa0052F07.12   | Unknown Protein                               | At1g03910 | Hypothetical Protein                                                                                                                                   |
| OSJNBa0052F07.14   | Putative Membrane Protein                     | At3g52190 | PHF1 (PHOSPHATE TRANSPORTER TRAFFIC FACILITATOR1); Nucleotide Binding                                                                                  |
| OSJNBa0052F07.23   | Unknown Protein                               | At3g23090 | Unknown Protein                                                                                                                                        |

|                    |                                             |           |                                                                                                                                                                                   |
|--------------------|---------------------------------------------|-----------|-----------------------------------------------------------------------------------------------------------------------------------------------------------------------------------|
| OSJNBa0052K01.16   | Unknown Protein                             | At3g47560 | Esterase/Lipase/Thioesterase Family Protein                                                                                                                                       |
| OSJNBa0052K01.18   | Putative Nucleosome Assembly Protein        | At5g56950 | NAP1;3 (NUCLEOSOME ASSEMBLY PROTEIN1;3); DNA Binding                                                                                                                              |
| OSJNBa0052K01.19   | Unknown Protein                             | At2g26070 | Rte1 (Reversion-To-Ethylene Sensitivity1)                                                                                                                                         |
| OSJNBa0052K01.2    | Putative Protein Phosphatase 2C             | At1g72770 | Hab1 (Homology To Abi1)                                                                                                                                                           |
| OSJNBa0052K01.23   | Putative Flap Endonuclease 1                | At5g26675 | Unknown Protein                                                                                                                                                                   |
| OSJNBa0052K15.13-1 | Putative Cyclic Nucleotide-Gated            | At5g53130 | CNGC1 (CYCLIC NUCLEOTIDE GATED CHANNEL 1); Calmodulin Binding / Cation Channel/ Cyclic Nucleotide Binding / Inward Rectifier Potassium Channel                                    |
| OSJNBa0052K15.15   | Putative 40S Ribosomal Protein S15A         | At4g29430 | RPS15AE (Ribosomal Protein S15A E); Structural Constituent Of Ribosome                                                                                                            |
| OSJNBa0052M16.38   | Acetolactate Synthase                       | At3g48560 | Csr1 (Chlorsulfuron/Imidazolinone Resistant 1)                                                                                                                                    |
| OSJNBa0052O12.10   | Putative Serine Palmitoyltransferase        | At5g23670 | LCB2 (Serine Palmitoyltransferase LCB2 (Long Chain Base) Subunit Gene); Serine C-Palmitoyltransferase                                                                             |
| OSJNBa0052O12.15   | Putative Carbonyl Reductase-Like Protein    | At5g61830 | Short-Chain Dehydrogenase/Reductase (SDR) Family Protein                                                                                                                          |
| OSJNBa0052O21.10   | Unknown Protein                             | At2g43820 | GT/UGT74F2 (UDP-GLUCOSYLTRANSFERASE 74F2); UDP-Glucosyltransferase/ UDP-Glycosyltransferase/ Transferase, Transferring Glycosyl Groups / Transferase, Transferring Hexosyl Groups |
| OSJNBa0052O21.15   | Unknown Protein                             | At1g05680 | UDP-Glucuronosyl/UDP-Glucosyl Transferase Family Protein                                                                                                                          |
| OSJNBa0053B21.10   | Unknown Protein                             | At1g36590 | Transposable Element Gene                                                                                                                                                         |
| OSJNBa0053C23.17   | Hypothetical Protein                        | At5g41900 | Hydrolase, Alpha/Beta Fold Family Protein                                                                                                                                         |
| OSJNBa0053C23.2    | Putative Glyoxylate Reductase               | At1g01510 | An (Angustifolia)                                                                                                                                                                 |
| OSJNBa0053C23.23   | Hypothetical Protein                        | At5g52810 | Ornithine Cyclodeaminase/Mu-Crystallin Family Protein                                                                                                                             |
| OSJNBa0053C23.4    | Putative Serine/Threonine Protein Kinase    | At4g01370 | ATMPK4 (MAP KINASE 4); MAP Kinase/ Kinase                                                                                                                                         |
| OSJNBa0053C23.5    | Unknown Protein                             | At4g25660 | Unknown Protein                                                                                                                                                                   |
| OSJNBa0053C23.6    | Putative Receptor-Like Protein Kinase       | At2g39360 | Protein Kinase Family Protein                                                                                                                                                     |
| OSJNBa0053D03.12   | Putative Flavonoid 3'-Hydroxylase           | At5g07990 | TT7 (TRANSPARENT TESTA 7); Flavonoid 3'-Monooxygenase/ Oxygen Binding                                                                                                             |
| OSJNBa0053E05.18   | Putative ATP-Dependent Clp Protease Subunit | At1g33360 | ATP-Dependent Clp Protease ATP-Binding Subunit Clpx, Putative                                                                                                                     |
| OSJNBa0053K19.11   | Unknown Protein                             | At1g11860 | Aminomethyltransferase, Putative                                                                                                                                                  |
| OSJNBa0053K19.19   | Unknown Protein                             | At1g11720 | ATSS3 (STARCH SYNTHASE 3); Starch Synthase/ Transferase, Transferring Glycosyl Groups                                                                                             |
| OSJNBa0053K19.7    | Unknown Protein                             | At5g26940 | Exonuclease Family Protein                                                                                                                                                        |
| OSJNBa0053K19.9    | Unknown Protein                             | At4g18360 | (S)-2-Hydroxy-Acid Oxidase, Peroxisomal, Putative / Glycolate Oxidase, Putative / Short Chain Alpha-Hydroxy Acid Oxidase, Putative                                                |
| OSJNBa0053L11.25   | F-Box Family Protein-Like                   | At1g56240 | ATPP2-B13 (Phloem Protein 2-B13)                                                                                                                                                  |
| OSJNBa0053L11.26-1 | Glutathione Reductase                       | At3g24170 | ATGR1; Glutathione-Disulfide Reductase                                                                                                                                            |
| OSJNBa0053L11.32   | Putative LEUNIG                             | At2g32700 | WD-40 Repeat Family Protein                                                                                                                                                       |
| OSJNBa0053L11.37   | Unknown Protein                             | At3g07090 | Unknown Protein                                                                                                                                                                   |
| OSJNBa0054H04.30   | Expressed Protein                           | At5g67370 | Unknown Protein                                                                                                                                                                   |
| OSJNBa0054K20.1    | Putative Pathogenesis-Related Protein PR-1  | At4g30320 | Allergen V5/Tpx-1-Related Family Protein                                                                                                                                          |
| OSJNBa0054K20.10   | Putative MAP Kinase Kinase                  | At3g21220 | ATMKK5 (MITOGEN-ACTIVATED PROTEIN KINASE KINASE 5); Kinase                                                                                                                        |

|                    |                                                 |           |                                                                                                                                               |
|--------------------|-------------------------------------------------|-----------|-----------------------------------------------------------------------------------------------------------------------------------------------|
| OSJNBa0054K20.13   | RING Zinc Finger Protein-Like                   | At4g32600 | Zinc Finger (C3HC4-Type RING Finger) Family Protein                                                                                           |
| OSJNBa0054K20.15-1 | Putative Glutamate Receptor Subunit Kainate     | At2g29100 | ATGLR2.9 (Arabidopsis Thaliana Glutamate Receptor 2.9)                                                                                        |
| OSJNBa0054K20.17   | Diacylglycerol Kinase-Like                      | At4g30340 | ATDGK7 (DIACYLGLYCEROL KINASE 7); Diacylglycerol Kinase                                                                                       |
| OSJNBa0054K20.22   | Putative Initiation Factor 3g                   | At3g11400 | EIF3G1 (Eukaryotic Translation Initiation Factor 3G1); RNA Binding / Translation Initiation Factor                                            |
| OSJNBa0054K20.23   | Unknown Protein                                 | At3g09250 | DNA Binding / Nuclease                                                                                                                        |
| OSJNBa0054K20.28-2 | Amino Acid Transporter-Like                     | At5g02180 | Amino Acid Transporter Family Protein                                                                                                         |
| OSJNBa0054K20.32   | Cyclic Nucleotide-Gated Calmodulin-Binding Ion  | At4g30360 | ATCNGC17 (Cyclic Nucleotide Gated Channel 17); Calmodulin Binding / Cyclic Nucleotide Binding / Ion Channel                                   |
| OSJNBa0054K20.36   | Putative Dem Protein                            | At3g19240 | Unknown Protein                                                                                                                               |
| OSJNBa0054K20.8    | Putative Serine Threonine Kinase                | At1g16760 | Protein Kinase Family Protein                                                                                                                 |
| OSJNBa0054L03.39-2 | Putative Poli-Like DNA Polymerase               | At1g50840 | POLGAMMA2 (Polymerase Gamma 2); DNA Binding / DNA-Directed DNA Polymerase                                                                     |
| OSJNBa0055C08.1    | Unknown Protein                                 | At3g27020 | YSL6 (YELLOW STRIPE LIKE 6); Oligopeptide Transporter                                                                                         |
| OSJNBa0055C08.14   | Unknown Protein                                 | At4g24990 | ATGP4 (Arabidopsis Thaliana Geranylgeranylated Protein)                                                                                       |
| OSJNBa0055C08.3    | Unknown Protein                                 | At5g50700 | Short-Chain Dehydrogenase/Reductase (SDR) Family Protein                                                                                      |
| OSJNBa0055E23.6    | Putative Peptide Chain Release Factor           | At3g62910 | APG3 (ALBINO AND PALE GREEN); Translation Release Factor                                                                                      |
| OSJNBa0055E23.9    | Putative Cupin                                  | At3g62020 | GLP10 (GERMIN-LIKE PROTEIN 10); Manganese Ion Binding / Metal Ion Binding / Nutrient Reservoir                                                |
| OSJNBa0055O03.14   | Putative Ferulate-5-Hydroxylase                 | At4g36220 | FAH1 (FERULATE-5-HYDROXYLASE 1); Ferulate 5-Hydroxylase                                                                                       |
| OSJNBa0055P24.13   | Putative Pol Polyprotein                        | At3g59280 | Txr1 (Thaxtomin A Resistant 1)                                                                                                                |
| OSJNBa0055P24.3    | Cytoplasmic Malate Dehydrogenase                | At5g43330 | Malate Dehydrogenase, Cytosolic, Putative                                                                                                     |
| OSJNBa0056A15.4    | Putative Receptor-Like Protein Kinase           | At4g00960 | Protein Kinase Family Protein                                                                                                                 |
| OSJNBa0056A20.5    | Putative Ribosomal Protein L7Ae-Like            | At4g22380 | Ribosomal Protein L7Ae/L30e/S12e/Gadd45 Family Protein                                                                                        |
| OSJNBa0056E06.11   | Putative Small GTP-Binding Protein              | At5g45130 | Rha1                                                                                                                                          |
| OSJNBa0056E06.17   | Putative Apical-Basal Pattern Formation Protein | At5g39500 | Pattern Formation Protein, Putative                                                                                                           |
| OSJNBa0056E06.2    | Putative Metal Transporter (With Alternative    | At1g31260 | ZIP10 (ZINC TRANSPORTER 10 PRECURSOR); Cation Transporter                                                                                     |
| OSJNBa0056E06.20   | Hypothetical Protein                            | At3g22540 | Unknown Protein                                                                                                                               |
| OSJNBa0056E06.3    | Putative Metal Transporter (With Alternative    | At2g04032 | ZIP7 (ZINC TRANSPORTER 7 PRECURSOR); Cation Transporter                                                                                       |
| OSJNBa0056E06.4    | Expressed Protein                               | At1g79120 | Unknown Protein                                                                                                                               |
| OSJNBa0056E06.9    | Expressed Protein                               | At1g31300 | Unknown Protein                                                                                                                               |
| OSJNBa0056G17.11   | Putative Serine/Threonine Kinase                | At5g63610 | HEN3 (HUA ENHANCER 3); Kinase                                                                                                                 |
| OSJNBa0056G17.13   | Putative Ubiquinone Oxidoreductase Subunit      | At3g03100 | Oxidoreductase                                                                                                                                |
| OSJNBa0056G17.14   | Unknown Protein                                 | At1g32090 | Early-Responsive To Dehydration Protein-Related / ERD Protein-Related                                                                         |
| OSJNBa0056G17.15   | Putative Cholinephosphate Cytidylyltransferase  | At4g15130 | Cholinephosphate Cytidylyltransferase, Putative / Phosphorylcholine Transferase, Putative / CTP:Phosphocholine Cytidylyltransferase, Putative |
| OSJNBa0056G17.16   | Putative Cellulose Synthase 5-Partial           | At5g16910 | ATCSLD2 (Cellulose Synthase-Like D2); Cellulose Synthase/ Transferase, Transferring Glycosyl Groups                                           |



|                   |                                             |           |                                                                                                                                                               |
|-------------------|---------------------------------------------|-----------|---------------------------------------------------------------------------------------------------------------------------------------------------------------|
| OSJNBa0056G17.2   | Unknown Protein                             | At1g32080 | Membrane Protein, Putative                                                                                                                                    |
| OSJNBa0056G17.32  | Putative Gypsy-Type Retrotransposon Protein | At5g59210 | Myosin Heavy Chain-Related                                                                                                                                    |
| OSJNBa0056G17.4   | Putative Urea Active Transport Protein      | At5g45380 | Sodium:Solute Symporter Family Protein                                                                                                                        |
| OSJNBa0056G17.5   | Putative Ankyrin Protein                    | At2g01680 | Ankyrin Repeat Family Protein                                                                                                                                 |
| OSJNBa0056G17.6   | Putative Clp Protease                       | At5g45390 | CLPP4 (Clp Protease Proteolytic Subunit 4); Endopeptidase Clp                                                                                                 |
| OSJNBa0056G17.7   | Unknown Protein                             | At5g45410 | Unknown Protein                                                                                                                                               |
| OSJNBa0056G17.9   | Putative ADP-Ribosylation Factor            | At5g17060 | ADP-Ribosylation Factor, Putative                                                                                                                             |
| OSJNBa0056O06.5   | Putative Microtubial Binding Protein        | At1g62040 | ATG8C (AUTOPHAGY 8C); Microtubule Binding                                                                                                                     |
| OSJNBa0056O06.9-1 | Glyoxalase I                                | At1g11840 | ATGLX1 (GLYOXALASE I HOMOLOG); Lactoylglutathione Lyase                                                                                                       |
| OSJNBa0057E11.25  | Putative Receptor-Like Kinase, 5'-Partial   | At4g21380 | ARK3 (Arabidopsis Receptor Kinase 3); Kinase                                                                                                                  |
| OSJNBa0057G07.14  | Putative WD Repeat-Protein                  | At2g26490 | Transducin Family Protein / WD-40 Repeat Family Protein                                                                                                       |
| OSJNBa0057G07.15  | Lipoxygenase L-2                            | At1g55020 | LOX1 (Lipoxygenase 1); Lipoxygenase                                                                                                                           |
| OSJNBa0057G07.17  | Putative Glycine Hydroxymethyltransferase   | At4g37930 | SHM1 (SERINE HYDROXYMETHYLTRANSFERASE 1); Glycine Hydroxymethyltransferase                                                                                    |
| OSJNBa0057G07.3   | Unknown Protein                             | At1g56290 | Cwfj-Like Family Protein                                                                                                                                      |
| OSJNBa0057G07.4   | Putative Deoxyhypusine Synthase             | At5g05920 | Dhs (Dhs)                                                                                                                                                     |
| OSJNBa0057L21.1   | Putative Phragmoplastin                     | At3g60190 | ADL4/ADLP2/DRP1E/EDR3 (DYNAMIN-LIKE PROTEIN 4); GTP Binding / Gtpase                                                                                          |
| OSJNBa0057L21.15  | Hypothetical Protein                        | At5g46920 | Intron Maturase, Type II Family Protein                                                                                                                       |
| OSJNBa0057L21.19  | Putative Peroxidase                         | At5g17820 | Peroxidase 57 (PER57) (P57) (PRXR10)                                                                                                                          |
| OSJNBa0057L21.9   | Putative Chlorophyll Synthase               | At1g44446 | CH1 (CHLORINA 1); Chlorophyll A Oxygenase                                                                                                                     |
| OSJNBa0057M23.115 | Unknown Protein                             | At2g16070 | Pdv2 (Plastid Division2)                                                                                                                                      |
| OSJNBa0057M23.117 | PRLI-Interacting Factor G-Like Protein      | At3g50780 | Unknown Protein                                                                                                                                               |
| OSJNBa0058D03.10  | Formamidopyrimidine-DNA Glycosylase-Like    | At1g52500 | ATFPG-1/ATFPG-2/ATMMH-1/ATMMH-2/FPG-1/FPG-2 (FORMAMIDOPYRIMIDINE-DNA GLYCOSYLASE 1, FORMAMIDOPYRIMIDINE-DNA GLYCOSYLASE 2); DNA N-Glycosylase                 |
| OSJNBa0058E19.16  | Putative Disease Resistance Protein         | At2g25790 | Leucine-Rich Repeat Transmembrane Protein Kinase, Putative                                                                                                    |
| OSJNBa0058G03.1   | Unknown Protein                             | At1g57680 | Unknown Protein                                                                                                                                               |
| OSJNBa0058G03.4   | Unknown Protein                             | At5g57580 | Calmodulin-Binding Protein                                                                                                                                    |
| OSJNBa0058G03.7   | Unknown Protein                             | At1g29150 | ATS9 (19S PROTEOSOME SUBUNIT 9); Binding                                                                                                                      |
| OSJNBa0058K23.10  | Unknown Protein                             | At2g02870 | Kelch Repeat-Containing F-Box Family Protein                                                                                                                  |
| OSJNBa0058K23.13  | Unknown Protein                             | At1g30570 | Protein Kinase Family Protein                                                                                                                                 |
| OSJNBa0058K23.14  | Unknown Protein                             | At5g21040 | F-Box Family Protein / WD-40 Repeat Family Protein                                                                                                            |
| OSJNBa0058K23.17  | Unknown Protein                             | At2g34660 | ATMRP2 (MULTIDRUG RESISTANCE-ASSOCIATED PROTEIN 2); Atpase, Coupled To Transmembrane Movement Of Substances                                                   |
| OSJNBa0058K23.7   | Unknown Protein                             | At5g46330 | FLS2 (FLAGELLIN-SENSITIVE 2); ATP Binding / Kinase/ Protein Binding / Protein Serine/Threonine Kinase/ Transmembrane Receptor Protein Serine/Threonine Kinase |
| OSJNBa0059E14.14  | Unknown Protein                             | At1g55340 | Unknown Protein                                                                                                                                               |
| OSJNBa0059E14.17  | Putative Ubiquinol-Cytochrome C Reductase   | At5g25450 | Ubiquinol-Cytochrome C Reductase Complex 14 Kda Protein, Putative                                                                                             |

|                   |                                                 |           |                                                                                                       |
|-------------------|-------------------------------------------------|-----------|-------------------------------------------------------------------------------------------------------|
| OSJNBa0059E14.19  | Hypothetical Protein                            | At5g28150 | Unknown Protein                                                                                       |
| OSJNBa0059E14.8   | Putative 40S Ribosomal Protein S2               | At3g57490 | 40S Ribosomal Protein S2 (RPS2D)                                                                      |
| OSJNBa0059E14.9   | Unknown Protein                                 | At3g08030 | Unknown Protein                                                                                       |
| OSJNBa0059G06.10  | Putative Chromosome Region Maintenance Protein  | At5g17020 | XPO1A (Exportin 1A); Protein Transporter                                                              |
| OSJNBa0059G06.13  | Unknown Protein                                 | At5g38060 | Unknown Protein                                                                                       |
| OSJNBa0059G06.2   | Putative Lipase/Acylhydrolase                   | At1g20120 | Family II Extracellular Lipase, Putative                                                              |
| OSJNBa0059G06.22  | Putative Gibberelin 20-Oxidase                  | At4g25420 | GA5 (GA REQUIRING 5); Gibberellin 20-Oxidase/ Gibberellin 3-Beta-Dioxygenase                          |
| OSJNBa0059G06.4   | Putative Mate Efflux Family Protein             | At4g22790 | MATE Efflux Family Protein                                                                            |
| OSJNBa0059G06.5   | Unknown Protein                                 | At3g60810 | Unknown Protein                                                                                       |
| OSJNBa0060A14.12  | Putative Glucosyltransferase                    | At5g03760 | ATCSLA09 (RESISTANT TO AGROBACTERIUM TRANSFORMATION 4); Transferase, Transferring Glycosyl Groups     |
| OSJNBa0060A14.17  | Putative Pectin Methylesterase                  | At3g29090 | Pectinesterase Family Protein                                                                         |
| OSJNBa0060B20.12  | Unknown Protein                                 | At1g31850 | Dehydration-Responsive Protein, Putative                                                              |
| OSJNBa0060B20.9   | Unknown Protein                                 | At5g16860 | Pentatricopeptide (PPR) Repeat-Containing Protein                                                     |
| OSJNBa0060D06.18  | Unknown Protein                                 | At3g13320 | CAX2 (CATION EXCHANGER 2); Calcium:Hydrogen Antiporter                                                |
| OSJNBa0060G17.3   | Hypothetical Protein                            | At5g07790 | Unknown Protein                                                                                       |
| OSJNBa0060K08.15  | Putative Molybdenum Cofactor Biosynthesis       | At2g31950 | Molybdopterin Synthase (CNX2)                                                                         |
| OSJNBa0060K08.30  | Unknown Protein                                 | At5g16730 | Unknown Protein                                                                                       |
| OSJNBa0060K08.35  | F-Box-Like Protein                              | At3g61590 | F-Box Family Protein                                                                                  |
| OSJNBa0060K08.43  | Putative BTB/POZ Domain-Containing Protein      | At3g61600 | ATPOB1 (Arabidopsis Thaliana POZ/BTB Containing-Protein 1); Protein Binding                           |
| OSJNBa0060M17.1   | Putative Polygalacturonase                      | At3g57510 | ADPG1 (Endo-Polygalacturonase 1); Polygalacturonase                                                   |
| OSJNBa0060M17.7   | Putative Calmodulin-Domain Protein Kinase       | At3g57530 | CPK32 (CALCIUM-DEPENDENT PROTEIN KINASE 32); Calcium- And Calmodulin-Dependent Protein Kinase/ Kinase |
| OSJNBa0060N03.10  | Unknown Protein                                 | At5g20810 | Calmodulin Binding                                                                                    |
| OSJNBa0060N03.11  | Unknown Protein                                 | At5g05680 | Nuclear Pore Complex Protein-Related                                                                  |
| OSJNBa0060N03.23  | Unknown Protein                                 | At1g22280 | Protein Phosphatase 2C, Putative / PP2C, Putative                                                     |
| OSJNBa0061E21.10  | Chloroplast RNA Processing Protein-Like Protein | At5g55840 | Pentatricopeptide (PPR) Repeat-Containing Protein                                                     |
| OSJNBa0061E21.13  | Putative Phosphatidylinositol 3-Kinase          | At1g60490 | ATVPS34 (Arabidopsis Thaliana Vacuolar Protein Sorting 34); Phosphatidylinositol 3-Kinase             |
| OSJNBa0061E21.29  | Putative TGF-Beta Receptor-Interacting Protein  | At2g46280 | TRIP-1 (TGF-BETA RECEPTOR INTERACTING PROTEIN 1); Nucleotide Binding                                  |
| OSJNBa0061G20.2   | Unknown Protein                                 | At4g27210 | Transposable Element Gene                                                                             |
| OSJNBa0061H20.1   | Putative Cytochrome P450                        | At2g45580 | CYP76C3 (Cytochrome P450, Family 76, Subfamily C, Polypeptide 3); Oxygen Binding                      |
| OSJNBa0061K21.15  | Putative Epimerase/Dehydratase                  | At5g28840 | GME (GDP-D-MANNOSE 3',5'-EPIMERASE); GDP-Mannose 3,5-Epimerase/ NAD Binding / Catalytic               |
| OSJNBa0061K21.20  | Putative Histone H2A                            | At5g02560 | Histone H2A, Putative                                                                                 |
| OSJNBa0061K21.21  | Putative Calcium-Transporting Atpase            | At3g22910 | Calcium-Transporting Atpase, Plasma Membrane-Type, Putative / Ca(2+)-Atpase, Putative (ACA13)         |
| OSJNBa0061L20.103 | Putative Zinc Transporter Protein ZIP1          | At1g05300 | ZIP5 (ZINC TRANSPORTER 5 PRECURSOR); Cation Transporter                                               |

|                     |                                                |           |                                                                                                                                                          |
|---------------------|------------------------------------------------|-----------|----------------------------------------------------------------------------------------------------------------------------------------------------------|
| OSJNBa0061L20.107-1 | Putative Nucleic Acid Binding Protein          | At3g11200 | PHD Finger Family Protein                                                                                                                                |
| OSJNBa0061L20.107-2 | Nucleic Acid Binding Protein-Like              | At1g14510 | PHD Finger Family Protein                                                                                                                                |
| OSJNBa0062C05.1     | Putative Malate Oxidoreductase, 5'-Partial     | At4g00570 | Malate Oxidoreductase, Putative                                                                                                                          |
| OSJNBa0062C05.25    | Putative PPR Repeat Containing Protein         | At3g60050 | Pentatricopeptide (PPR) Repeat-Containing Protein                                                                                                        |
| OSJNBa0062C05.29    | Putative TPR (Tetratricopeptide Repeat) Domain | At1g33400 | Tetratricopeptide Repeat (TPR)-Containing Protein                                                                                                        |
| OSJNBa0062G05.28    | PPR-Repeat Protein-Like                        | At4g39530 | Pentatricopeptide (PPR) Repeat-Containing Protein                                                                                                        |
| OSJNBa0063C18.16    | Unknown Protein                                | At1g69670 | ATCUL3B/CUL3B (Cullin 3B); Protein Binding / Ubiquitin-Protein Ligase                                                                                    |
| OSJNBa0063C18.17    | Unknown Protein                                | At3g58730 | (VACUOLAR ATP SYNTHASE SUBUNIT D); Hydrogen Ion Transporting ATP Synthase, Rotational Mechanism / Hydrogen Ion Transporting Atpase, Rotational Mechanism |
| OSJNBa0063C18.18    | Unknown Protein                                | At3g25660 | Glutamyl-Trna(Gln) Amidotransferase, Putative                                                                                                            |
| OSJNBa0063C18.19    | Unknown Protein                                | At1g62640 | KAS III (3-KETOACYL-ACYL CARRIER PROTEIN SYNTHASE III); 3-Oxoacyl-[Acyl-Carrier-Protein] Synthase                                                        |
| OSJNBa0063E14.35    | Putative 68 Kda Protein HP68                   | At4g19210 | ATRLI2 (Arabidopsis Thaliana Rnase L Inhibitor Protein 2)                                                                                                |
| OSJNBa0063H21.19    | Unknown Protein                                | At2g11890 | Adenylate Cyclase                                                                                                                                        |
| OSJNBa0063K04.14    | Pentatricopeptide (PPR) Repeat-Containing      | At4g01400 | Pentatricopeptide (PPR) Repeat-Containing Protein                                                                                                        |
| OSJNBa0064D20.11    | Unknown Protein                                | At1g59750 | ARF1 (AUXIN RESPONSE FACTOR 1); Transcription Factor                                                                                                     |
| OSJNBa0064D20.8     | Unknown Protein                                | At1g59740 | Proton-Dependent Oligopeptide Transport (POT) Family Protein                                                                                             |
| OSJNBa0064D20.9     | Unknown Protein                                | At5g08500 | Transmembrane CLPTM1 Family Protein                                                                                                                      |
| OSJNBa0064E16.10    | Putative Membrane Protein                      | At4g12980 | Auxin-Responsive Protein, Putative                                                                                                                       |
| OSJNBa0064E16.11    | Unknown Protein                                | At5g48750 | Auxin-Responsive Protein, Putative                                                                                                                       |
| OSJNBa0064E16.15    | Unknown Protein                                | At5g55530 | C2 Domain-Containing Protein                                                                                                                             |
| OSJNBa0064E16.4     | Putative Sulfate Transporter                   | At1g22150 | SULTR1;3 (Sulfate Transporter); Sulfate Transporter                                                                                                      |
| OSJNBa0064E16.6     | Putative Sulfate Transporter                   | At5g10180 | AST68 (Sulfate Transporter 2.1)                                                                                                                          |
| OSJNBa0064E16.9     | Putative Transaminase                          | At4g33680 | AGD2 (ABERRANT GROWTH AND DEATH 2); Transaminase                                                                                                         |
| OSJNBa0064G10.13    | Unknown Protein                                | At1g08590 | CLAVATA1 Receptor Kinase (CLV1)                                                                                                                          |
| OSJNBa0064G10.14    | Unknown Protein                                | At5g36970 | Nhl25 (Ndr1/Hin1-Like 25)                                                                                                                                |
| OSJNBa0064G10.16    | Unknown Protein                                | At5g08570 | Pyruvate Kinase, Putative                                                                                                                                |
| OSJNBa0064G16.2     | Putative Sucrose-Phosphatase                   | At1g51420 | Sucrose-Phosphatase, Putative                                                                                                                            |
| OSJNBa0064H22.10    | Unknown Protein                                | At2g03200 | Aspartyl Protease Family Protein                                                                                                                         |
| OSJNBa0064H22.16    | Unknown Protein                                | At5g67030 | ABA1 (ABA DEFICIENT 1); Zeaxanthin Epoxidase                                                                                                             |
| OSJNBa0064H22.19    | Unknown Protein                                | At1g14070 | FUT7 (Fucosyltransferase 7); Fucosyltransferase/ Transferase, Transferring Glycosyl Groups                                                               |
| OSJNBa0064H22.2     | Unknown Protein                                | At5g17330 | GAD (Glutamate Decarboxylase 1); Calmodulin Binding                                                                                                      |
| OSJNBa0064H22.21    | Unknown Protein                                | At4g37030 | Unknown Protein                                                                                                                                          |
| OSJNBa0064H22.6     | Unknown Protein                                | At2g02010 | Glutamate Decarboxylase, Putative                                                                                                                        |
| OSJNBa0064H22.7     | Unknown Protein                                | At3g20300 | Extracellular Ligand-Gated Ion Channel                                                                                                                   |

|                   |                                                  |           |                                                                                        |
|-------------------|--------------------------------------------------|-----------|----------------------------------------------------------------------------------------|
| OSJNBa0064M23.11  | Unknown Protein                                  | At3g02310 | SEP2 (SEPALLATA2); DNA Binding / Transcription Factor                                  |
| OSJNBa0064M23.12  | Unknown Protein                                  | At3g61460 | BRH1 (BRASSINOSTEROID-RESPONSIVE RING-H2); Protein Binding / Zinc Ion Binding          |
| OSJNBa0064M23.14  | Unknown Protein                                  | At5g24530 | Oxidoreductase, 2OG-Fe(II) Oxygenase Family Protein                                    |
| OSJNBa0064M23.15  | Unknown Protein                                  | At4g10500 | Oxidoreductase, 2OG-Fe(II) Oxygenase Family Protein                                    |
| OSJNBa0065B15.8   | Unknown Protein                                  | At4g39330 | Oxidoreductase/ Zinc Ion Binding                                                       |
| OSJNBa0065C16.14  | Profilin A                                       | At2g19770 | PRF5 (PROFILIN5); Actin Binding / Actin Monomer Binding                                |
| OSJNBa0065C16.15  | Putative Beta-Glucosidase                        | At1g26560 | Glycosyl Hydrolase Family 1 Protein                                                    |
| OSJNBa0065F09.11  | Putative GTP-Binding Protein                     | At5g52210 | ATGB1 (Arabidopsis Thaliana GTP-Binding Protein 1)                                     |
| OSJNBa0065J17.11  | Putative Peroxidase                              | At5g66390 | Peroxidase 72 (PER72) (P72) (PRXR8)                                                    |
| OSJNBa0065O17.14  | Unknown Protein                                  | At4g00460 | ATROPGEF3/ROPGEF3 (KINASE PARTNER PROTEIN-LIKE); Rho Guanyl-Nucleotide Exchange Factor |
| OSJNBa0066H10.123 | KH Domain-Like Protein                           | At3g08620 | KH Domain-Containing Protein                                                           |
| OSJNBa0066H15.11  | Putative TNFR-Like Receptor Kinase               | At3g59420 | ACR4 (ARABIDOPSIS CRINKLY4); Kinase                                                    |
| OSJNBa0066H15.13  | Putative Leucine-Rich Receptor-Like Protein      | At4g18670 | Leucine-Rich Repeat Family Protein / Extensin Family Protein                           |
| OSJNBa0066H15.17  | Putative Gag And Pol Polyprotein                 | At1g11265 | Transposable Element Gene; Copia-Like Retrotransposon Family,                          |
| OSJNBa0066H15.19  | Putative LSTK-1-Like Kinase                      | At1g54510 | Protein Kinase Family Protein                                                          |
| OSJNBa0066H15.2   | Putative Protein Kinase                          | At3g22750 | Protein Kinase, Putative                                                               |
| OSJNBa0066I08.2   | Hypothetical Protein                             | At3g15480 | Unknown Protein                                                                        |
| OSJNBa0067E01.3   | Putative Thiamin Biosynthesis Protein            | At2g29630 | Thiamine Biosynthesis Family Protein / Thic Family Protein                             |
| OSJNBa0067G20.8   | Unknown Protein                                  | At1g70080 | Terpene Synthase/Cyclase Family Protein                                                |
| OSJNBa0067K08.12  | Unknown Protein                                  | At3g59820 | Calcium Ion Binding                                                                    |
| OSJNBa0067K08.13  | Unknown Protein                                  | At5g16970 | AT-AER (ALKENAL REDUCTASE); 2-Alkenal Reductase                                        |
| OSJNBa0067K08.22  | Unknown Protein                                  | At1g22450 | COX6B (CYTOCHROME C OXIDASE 6B); Cytochrome-C Oxidase                                  |
| OSJNBa0067K08.23  | Unknown Protein                                  | At3g02470 | Samdc (S-Adenosylmethionine Decarboxylase)                                             |
| OSJNBa0067K08.3   | Unknown Protein                                  | At3g07565 | Unknown Protein                                                                        |
| OSJNBa0067K08.7   | Unknown Protein                                  | At3g59710 | Short-Chain Dehydrogenase/Reductase (SDR) Family Protein                               |
| OSJNBa0067K08.8   | Unknown Protein                                  | At5g16250 | Unknown Protein                                                                        |
| OSJNBa0067N01.14  | Putative Cell Death Suppressor Protein           | At3g44880 | Acd1 (Accelerated Cell Death 1, Pheophorbide A Oxygenase)                              |
| OSJNBa0067N01.16  | Tonoplast Intrinsic Protein                      | At2g36830 | GAMMA-TIP (Tonoplast Intrinsic Protein (TIP) Gamma); Water Channel                     |
| OSJNBa0067N01.17  | Putative GTP-Binding Protein                     | At5g03530 | ATRA ALPHA (Arabidopsis Rab Gtpase Homolog C2a); GTP Binding                           |
| OSJNBa0067N01.22  | Putative Zfwd1 Protein With Similarity To Myosin | At4g25440 | ZFWD1 (Zinc Finger WD40 Repeat Protein 1); Nucleic Acid Binding / Zinc Ion Binding     |
| OSJNBa0068A07.14  | Putative Translation Initiation Factor 2B Beta   | At3g07300 | GTP Binding / Translation Initiation Factor                                            |
| OSJNBa0068A07.23  | Putative Lipase                                  | At1g28570 | GDSL-Motif Lipase, Putative                                                            |
| OSJNBa0068L06.10  | Unknown Protein                                  | At5g64440 | Amidase Family Protein                                                                 |
| OSJNBa0068L06.2   | Unknown Protein                                  | At5g06900 | CYP93D1 (Cytochrome P450, Family 93, Subfamily D, Polypeptide 1); Oxygen Binding       |

|                  |                                       |           |                                                                                                             |
|------------------|---------------------------------------|-----------|-------------------------------------------------------------------------------------------------------------|
| OSJNBa0068L06.3  | Unknown Protein                       | At1g03620 | Phagocytosis And Cell Motility Protein ELMO1-Related                                                        |
| OSJNBa0068L06.7  | Unknown Protein                       | At1g58140 | Transposable Element Gene; Copia-Like Retrotransposon Family,                                               |
| OSJNBa0068L06.8  | Unknown Protein                       | At5g64460 | Unknown Protein                                                                                             |
| OSJNBa0068L06.9  | Unknown Protein                       | At1g06200 | Serine-Type Peptidase                                                                                       |
| OSJNBa0069D17.1  | Unknown Protein                       | At4g13010 | Oxidoreductase, Zinc-Binding Dehydrogenase Family Protein                                                   |
| OSJNBa0069E14.13 | Putative Dehydrogenase                | At3g03980 | Short-Chain Dehydrogenase/Reductase (SDR) Family Protein                                                    |
| OSJNBa0069E14.2  | Putative RNA-Binding Protein          | At3g13460 | Ect2                                                                                                        |
| OSJNBa0069E14.3  | Putative Growth Inhibitory Protein    | At1g54390 | PHD Finger Protein-Related                                                                                  |
| OSJNBa0069E14.8  | Putative Exohydrolase                 | At5g20950 | Glycosyl Hydrolase Family 3 Protein                                                                         |
| OSJNBa0069P02.20 | Putative 2-Oxoacid-Dependent Oxidase  | At3g49620 | DIN11 (DARK INDUCIBLE 11); Oxidoreductase                                                                   |
| OSJNBa0070C17.12 | Unknown Protein                       | At1g30630 | Coatomer Protein Epsilon Subunit Family Protein / COPE Family Protein                                       |
| OSJNBa0070C17.14 | Unknown Protein                       | At1g79490 | EMB2217 (EMBRYO DEFECTIVE 2217); Binding                                                                    |
| OSJNBa0070C17.16 | Unknown Protein                       | At4g20050 | Qrt3 (Quartet 3)                                                                                            |
| OSJNBa0070C17.2  | Unknown Protein                       | At4g13840 | Transferase Family Protein                                                                                  |
| OSJNBa0070C17.23 | Unknown Protein                       | At2g35060 | KUP11 (K+ Uptake Permease 11); Potassium Ion Transporter                                                    |
| OSJNBa0070C17.24 | Unknown Protein                       | At2g29260 | Tropinone Reductase, Putative / Tropine Dehydrogenase, Putative                                             |
| OSJNBa0070M12.12 | Unknown Protein                       | At2g46860 | Inorganic Pyrophosphatase, Putative (Soluble) / Pyrophosphate Phospho-Hydrolase, Putative / Ppase, Putative |
| OSJNBa0070M12.4  | Unknown Protein                       | At2g35930 | U-Box Domain-Containing Protein                                                                             |
| OSJNBa0070M12.7  | Unknown Protein                       | At3g15130 | Pentatricopeptide (PPR) Repeat-Containing Protein                                                           |
| OSJNBa0070M12.8  | Unknown Protein                       | At1g49180 | Protein Kinase Family Protein                                                                               |
| OSJNBa0070N04.14 | Putative Oxidoreductase               | At1g75200 | Flavodoxin Family Protein / Radical SAM Domain-Containing Protein                                           |
| OSJNBa0070N04.15 | Hypothetical Protein                  | At2g22070 | Pentatricopeptide (PPR) Repeat-Containing Protein                                                           |
| OSJNBa0070N04.26 | Hypothetical Protein                  | At5g03030 | DNAJ Heat Shock N-Terminal Domain-Containing Protein                                                        |
| OSJNBa0070N04.5  | Phosphoglucose Isomerase (Pgi-A)      | At5g42740 | Glucose-6-Phosphate Isomerase, Cytosolic (PGIC)                                                             |
| OSJNBa0070N04.6  | Putative Kinase                       | At1g49270 | Protein Kinase Family Protein                                                                               |
| OSJNBa0070N04.9  | Unknown Protein                       | At1g05070 | Unknown Protein                                                                                             |
| OSJNBa0070O11.10 | Unknown Protein                       | At5g10790 | UBP22 (UBIQUITIN-SPECIFIC PROTEASE 22); Ubiquitin-Specific Protease                                         |
| OSJNBa0070O11.5  | Unknown Protein                       | At4g32140 | Unknown Protein                                                                                             |
| OSJNBa0071I13.11 | Unknown Protein                       | At4g30190 | AHA2 (Arabidopsis H(+)-Atpase 2); Atpase                                                                    |
| OSJNBa0071I13.13 | Unknown Protein                       | At2g18980 | Peroxidase, Putative                                                                                        |
| OSJNBa0071I20.6  | Putative Ribosomal Protein S10p/S20e  | At3g47370 | Structural Constituent Of Ribosome                                                                          |
| OSJNBa0071K18.5  | Putative WD Domain Containing Protein | At2g20330 | Transducin Family Protein / WD-40 Repeat Family Protein                                                     |
| OSJNBa0071K18.7  | Unknown Protein                       | At1g07040 | Unknown Protein                                                                                             |
| OSJNBa0071K19.11 | Putative Notchless Protein Homolog    | At5g52820 | WD-40 Repeat Family Protein / Notchless Protein, Putative                                                   |

|                    |                                              |           |                                                                                                                                     |
|--------------------|----------------------------------------------|-----------|-------------------------------------------------------------------------------------------------------------------------------------|
| OSJNBa0071K19.14   | Putative Chromomethylase                     | At1g69770 | Cmt3 (Chromomethylase 3)                                                                                                            |
| OSJNBa0071M09.1    | Hypothetical Protein                         | At3g11670 | DGD1 (DIGALACTOSYL DIACYLGLYCEROL DEFICIENT 1); Galactolipid Galactosyltransferase                                                  |
| OSJNBa0071M09.22   | SR-Rich Pre-Mrna Splicing Activator          | At2g29210 | Splicing Factor PWI Domain-Containing Protein                                                                                       |
| OSJNBa0071M09.8    | Hypothetical Protein                         | At5g06060 | Tropinone Reductase, Putative / Tropine Dehydrogenase, Putative                                                                     |
| OSJNBa0072D21.10   | Unknown Protein                              | At3g48530 | CBS Domain-Containing Protein                                                                                                       |
| OSJNBa0072D21.14   | Unknown Protein                              | At2g05170 | ATVPS11 (Arabidopsis Thaliana Vacuolar Protein Sorting 11); Transporter                                                             |
| OSJNBa0072D21.2    | Unknown Protein                              | At4g33650 | ADL2 (ARABIDOPSIS DYNAMIN-LIKE 2); GTP Binding / Gtpase                                                                             |
| OSJNBa0072D21.3    | Unknown Protein                              | At1g78560 | Bile Acid:Sodium Symporter Family Protein                                                                                           |
| OSJNBa0072F16.1    | Unknown Protein                              | At1g12900 | Gapa-2                                                                                                                              |
| OSJNBa0072F16.19   | Unknown Protein                              | At1g25530 | Lysine And Histidine Specific Transporter, Putative                                                                                 |
| OSJNBa0072F16.3    | Unknown Protein                              | At1g18800 | NRP2 (NAP1-RELATED PROTEIN 2); DNA Binding / Chromatin Binding / Histone Binding                                                    |
| OSJNBa0072F16.4    | Unknown Protein                              | At5g39840 | ATP-Dependent RNA Helicase                                                                                                          |
| OSJNBa0072F16.5    | Unknown Protein                              | At5g39830 | DEGP8 (DEGP PROTEASE 8); Serine-Type Peptidase/ Trypsin                                                                             |
| OSJNBa0072H09.17   | Extracellular Calcium Sensing Receptor       | At5g23060 | Unknown Protein                                                                                                                     |
| OSJNBa0072I06.4    | Unknown Protein                              | At2g04039 | Unknown Protein                                                                                                                     |
| OSJNBa0072K14.12   | Unknown Protein                              | At4g23160 | Protein Kinase Family Protein                                                                                                       |
| OSJNBa0072K14.18   | Unknown Protein                              | At3g26810 | AFB2 (AUXIN SIGNALING F-BOX 2); Auxin Binding / Ubiquitin-Protein Ligase                                                            |
| OSJNBa0072K14.5    | Unknown Protein                              | At5g55070 | 2-Oxoacid Dehydrogenase Family Protein                                                                                              |
| OSJNBa0073A18.26-1 | Unknown Protein                              | At5g42570 | Unknown Protein                                                                                                                     |
| OSJNBa0073A18.28   | Putative Ribosomal Protein L10a              | At2g27530 | 60S Ribosomal Protein L10A (RPL10aB)                                                                                                |
| OSJNBa0073A21.16   | SAM-Dependent Methyltransferase-Like         | At1g54310 | RNA Binding                                                                                                                         |
| OSJNBa0073A21.17   | LEM3 (Ligand-Effect Modulator 3)-Like        | At3g12740 | LEM3 (Ligand-Effect Modulator 3) Family Protein / CDC50 Family Protein                                                              |
| OSJNBa0073A21.22   | Serine/Threonine Protein Kinase              | At2g24360 | Serine/Threonine/Tyrosine Kinase, Putative                                                                                          |
| OSJNBa0073A21.31   | Putative High Affinity Potassium Transporter | At4g10310 | HKT1 (HIGH-AFFINITY K+ TRANSPORTER 1); Sodium Ion Transporter                                                                       |
| OSJNBa0073A21.8-1  | Putative Cytochrome P450                     | At4g15110 | CYP97B3 (Cytochrome P450, Family 97, Subfamily B, Polypeptide 3); Oxygen Binding                                                    |
| OSJNBa0073E02.3    | Unknown Protein                              | At1g08630 | Tha1 (Threonine Aldolase 1)                                                                                                         |
| OSJNBa0073E02.7    | Unknown Protein                              | At2g31190 | Hypothetical Protein                                                                                                                |
| OSJNBa0073G17.1    | Putative WD Repeat Protein                   | At5g08560 | Transducin Family Protein / WD-40 Repeat Family Protein                                                                             |
| OSJNBa0073L01.1    | Putative Histidine Kinase                    | At5g35750 | Ahk2 (Arabidopsis Histidine Kinase 2)                                                                                               |
| OSJNBa0073L01.13   | Hypothetical Protein                         | At4g38270 | GAUT3 (Galacturonosyltransferase 3); Polygalacturonate 4-Alpha-Galacturonosyltransferase/ Transferase, Transferring Glycosyl Groups |
| OSJNBa0073L01.2    | Putative Acetyl-Coa Carboxylase              | At1g36160 | ACC1 (ACETYL-COENZYME A CARBOXYLASE 1); Acetyl-Coa Carboxylase                                                                      |
| OSJNBa0073L01.3    | Putative Kelch-Containing Protein            | At1g22040 | Kelch Repeat-Containing F-Box Family Protein                                                                                        |
| OSJNBa0073L04.3    | Unknown Protein                              | At3g52820 | ATPAP22/PAP22 (Purple Acid Phosphatase 22); Acid Phosphatase/ Protein Serine/Threonine Phosphatase                                  |

|                   |                                                    |           |                                                                                                |
|-------------------|----------------------------------------------------|-----------|------------------------------------------------------------------------------------------------|
| OSJNBa0073L04.5   | Unknown Protein                                    | At2g36290 | Hydrolase, Alpha/Beta Fold Family Protein                                                      |
| OSJNBa0073L04.7   | Unknown Protein                                    | At2g27510 | ATFD3 (FERREDOXIN 3); Electron Carrier                                                         |
| OSJNBa0073L04.8   | Unknown Protein                                    | At2g27500 | Hydrolase, Hydrolyzing O-Glycosyl Compounds                                                    |
| OSJNBa0073L04.9   | Unknown Protein                                    | At3g52720 | Carbonic Anhydrase Family Protein                                                              |
| OSJNBa0073L20.20  | Putative Crooked Neck Protein                      | At3g13210 | Crooked Neck Protein, Putative / Cell Cycle Protein, Putative                                  |
| OSJNBa0073L20.5   | Putative CDP-Diacylglycerol Synthetase             | At4g26770 | Phosphatidate Cytidyltransferase, Putative / CDP-Diglyceride Synthetase, Putative              |
| OSJNBa0074P11.1   | 'Unknown Protein, Contains TPR Domain'             | At1g53300 | TTL1 (TETRATRICOPETIDE-REPEAT THIOREDOXIN-LIKE 1); Binding                                     |
| OSJNBa0074P11.10  | 'Unknown Protein, Contains PPR Repeat'             | At3g49170 | EMB2261 (EMBRYO DEFECTIVE 2261); Binding                                                       |
| OSJNBa0074P11.13  | Unknown Protein                                    | At2g46420 | Unknown Protein                                                                                |
| OSJNBa0075A22.20  | TATA-Binding Protein TBP2                          | At1g55520 | TBP2 (TATA Binding Protein 2); DNA Binding / RNA Polymerase II Transcription Factor            |
| OSJNBa0075A22.22  | Putative Beta-1,3-Glucanase                        | At1g64760 | Hydrolase, Hydrolyzing O-Glycosyl Compounds                                                    |
| OSJNBa0075A22.24  | Putative Sodium/Calcium Exchanger Protein          | At5g17860 | Cation Exchanger, Putative (CAX7)                                                              |
| OSJNBa0075A22.29  | Putative 3-Isopropylmalate Dehydrogenase           | At1g80560 | 3-Isopropylmalate Dehydrogenase, Chloroplast, Putative                                         |
| OSJNBa0075G19.1   | N-Hydroxycinnamoyl/Benzoyltransferase-Like Protein | At5g07850 | Transferase Family Protein                                                                     |
| OSJNBa0075G19.13  | Hypothetical Protein                               | At1g62730 | Unknown Protein                                                                                |
| OSJNBa0075G19.5   | Putative Acyl-Coa Oxidase                          | At4g16760 | Acx1 (Acyl-Coa Oxidase 1)                                                                      |
| OSJNBa0075N02.110 | Tubulin-Related Protein-Like Peotein               | At4g37190 | Unknown Protein                                                                                |
| OSJNBa0075N02.115 | Synbindin-Like Protein                             | At5g02280 | Synbindin, Putative                                                                            |
| OSJNBa0075N02.118 | Tetratricopeptide Repeat (TPR)-Containing          | At5g17270 | Tetratricopeptide Repeat (TPR)-Containing Protein                                              |
| OSJNBa0076F20.10  | Putative Cytochrome                                | At5g53560 | ATB5-A (Cytochrome B5 A)                                                                       |
| OSJNBa0076F20.16  | Putative Aldo/Keto Reductase                       | At5g53580 | Aldo/Keto Reductase Family Protein                                                             |
| OSJNBa0076F20.2   | Putative Receptor Protein Kinase                   | At4g10390 | Protein Kinase Family Protein                                                                  |
| OSJNBa0076F20.3   | Putative Electron Transfer Oxidoreductase          | At2g43400 | ETFQO (ELECTRON-TRANSFER FLAVOPROTEIN:UBIQUINONE OXIDOREDUCTASE); Catalytic/ Electron Acceptor |
| OSJNBa0076F20.4   | Unknown Protein                                    | At1g64980 | Unknown Protein                                                                                |
| OSJNBa0076F20.6   | Putative Gamma-Lyase                               | At1g64660 | ATMGL; Catalytic/ Methionine Gamma-Lyase                                                       |
| OSJNBa0076F20.9   | Putative Retrotransposon Polyprotein               | At4g21360 | Transposable Element Gene                                                                      |
| OSJNBa0076N16.21  | Unknown Protein                                    | At2g43330 | ATINT1 (INOSITOL TRANSPORTER 1); Carbohydrate Transporter/ Sugar Porter                        |
| OSJNBa0076N16.22  | Unknown Protein                                    | At1g65430 | Zinc Finger Protein-Related                                                                    |
| OSJNBa0077F02.122 | Putative Alpha Subunit Of F-Actin Capping          | At3g05520 | F-Actin Capping Protein Alpha Subunit Family Protein                                           |
| OSJNBa0077J18.6   | Putative Chalcone Synthase 1                       | At5g13930 | CHS (CHALCONE SYNTHASE); Naringenin-Chalcone Synthase                                          |
| OSJNBa0077M12.117 | Receptor Like Protein                              | At4g22140 | DNA Binding                                                                                    |
| OSJNBa0078A17.10  | Unknown Protein                                    | At3g17800 | Unknown Protein                                                                                |
| OSJNBa0078A17.11  | Putative Anthranilate Synthase Beta Subunit        | At5g57890 | Anthranilate Synthase Beta Subunit, Putative                                                   |
| OSJNBa0078A17.12  | Actin                                              | At3g12110 | ACT11 (ACTIN-11); Structural Constituent Of Cytoskeleton                                       |

|                    |                                                                                |           |                                                                                                                                                                                    |
|--------------------|--------------------------------------------------------------------------------|-----------|------------------------------------------------------------------------------------------------------------------------------------------------------------------------------------|
| OSJNBa0078A17.13   | Putative Transposase                                                           | At4g38180 | FRS5 (FAR1-RELATED SEQUENCE 5); Zinc Ion Binding                                                                                                                                   |
| OSJNBa0078A17.19   | Putative Root-Specific Protein                                                 | At4g12470 | Protease Inhibitor/Seed Storage/Lipid Transfer Protein (LTP) Family Protein                                                                                                        |
| OSJNBa0078A17.4    | Gibberellin-Induced Receptor-Like Kinase TMK                                   | At1g66150 | Tmk1 (Transmembrane Kinase 1)                                                                                                                                                      |
| OSJNBa0078A17.8    | Putative Splicing Factor                                                       | At5g06160 | Splicing Factor-Related                                                                                                                                                            |
| OSJNBa0078D03.20   | Putative Na <sup>+</sup> /K <sup>+</sup> /Cl <sup>-</sup> -Cotransport Protein | At1g30450 | CCC1; Cation:Chloride Symporter                                                                                                                                                    |
| OSJNBa0078D06.30   | Putative Protein Phosphatase 2C                                                | At3g17090 | Protein Phosphatase Type 2C                                                                                                                                                        |
| OSJNBa0078D06.32   | Putative Galactose Kinase                                                      | At3g06580 | GAL1 (GALACTOSE KINASE 1); ATP Binding / Galactokinase                                                                                                                             |
| OSJNBa0078D06.36   | Unknown Protein                                                                | At4g01880 | Unknown Protein                                                                                                                                                                    |
| OSJNBa0078D06.37   | Unknown Protein, 5'-Partial                                                    | At1g20980 | SPL14 (SQUAMOSA PROMOTER BINDING PROTEIN-LIKE 14); DNA Binding / Transcription Factor                                                                                              |
| OSJNBa0078K05.12   | Putative Sesquiterpene Cyclase                                                 | At3g14520 | Terpene Synthase/Cyclase Family Protein                                                                                                                                            |
| OSJNBa0078N11.28-1 | Chromosome Structural Maintenance Protein-Like                                 | At3g47700 | Mag2                                                                                                                                                                               |
| OSJNBa0078N11.31   | Kelch Repeat-Containing F-Box-Like                                             | At1g74510 | Kelch Repeat-Containing F-Box Family Protein                                                                                                                                       |
| OSJNBa0078N11.41   | Transitional Endoplasmic Reticulum Atpase-Like                                 | At1g50140 | AAA-Type Atpase Family Protein                                                                                                                                                     |
| OSJNBa0078O01.10   | Putative Leaf Protein                                                          | At3g18110 | EMB1270 (EMBRYO DEFECTIVE 1270); Binding                                                                                                                                           |
| OSJNBa0078O01.25   | Putative Leaf Protein                                                          | At1g60770 | Pentatricopeptide (PPR) Repeat-Containing Protein                                                                                                                                  |
| OSJNBa0078O01.26   | Putative Leaf Protein                                                          | At2g20710 | Pentatricopeptide (PPR) Repeat-Containing Protein                                                                                                                                  |
| OSJNBa0078O01.6    | Unknown Protein                                                                | At3g47160 | Protein Binding / Zinc Ion Binding                                                                                                                                                 |
| OSJNBa0078O01.9    | Putative Pkcq-Interacting Protein                                              | At4g04950 | Thioredoxin Family Protein                                                                                                                                                         |
| OSJNBa0079A21.10   | Unknown Protein                                                                | At2g44830 | Protein Kinase, Putative                                                                                                                                                           |
| OSJNBa0079A21.12   | Unknown Protein                                                                | At3g27660 | Oleo4 (Oleosin4)                                                                                                                                                                   |
| OSJNBa0079A21.20   | Unknown Protein                                                                | At5g47310 | Unknown Protein                                                                                                                                                                    |
| OSJNBa0079B05.15   | Unknown Protein                                                                | At2g26500 | Cytochrome B6f Complex Subunit (Petm), Putative                                                                                                                                    |
| OSJNBa0079B15.25   | Putative Aurora-Related Kinase                                                 | At2g45490 | ATAUR3 (ATAURORA3); ATP Binding / Histone Serine Kinase(H3-S10 Specific) / Protein Kinase                                                                                          |
| OSJNBa0079B15.8    | Unknown Protein                                                                | At3g18940 | Clast3-Related                                                                                                                                                                     |
| OSJNBa0079L16.13   | Putative Peptide Transport Protein                                             | At5g46050 | ATPTR3/PTR3 (PEPTIDE TRANSPORTER PROTEIN 3); Transporter                                                                                                                           |
| OSJNBa0079L16.17   | Putative CER1                                                                  | At2g37700 | CER1 Protein, Putative                                                                                                                                                             |
| OSJNBa0079M09.13   | Unknown Protein                                                                | At3g45780 | PHOT1 (Phototropin 1); Kinase                                                                                                                                                      |
| OSJNBa0079M09.14   | Unknown Protein                                                                | At4g37940 | AGL21 (AGAMOUS-LIKE 21); Transcription Factor                                                                                                                                      |
| OSJNBa0081C01.1    | Unknown Protein                                                                | At2g20770 | Lanthionine Synthetase C-Like Family Protein                                                                                                                                       |
| OSJNBa0081C01.11   | Unknown Protein                                                                | At5g10560 | Glycosyl Hydrolase Family 3 Protein                                                                                                                                                |
| OSJNBa0081C01.12   | Unknown Protein                                                                | At1g13250 | GATL3 (Galacturonosyltransferase-Like 3); Polygalacturonate 4-Alpha-Galacturonosyltransferase/ Transferase, Transferring Hexosyl Groups / Transferase, Transferring Hexosyl Groups |
| OSJNBa0081C01.15   | Unknown Protein                                                                | At3g49640 | FAD Binding / Oxidoreductase                                                                                                                                                       |
| OSJNBa0081C01.16   | Unknown Protein                                                                | At2g37710 | RLK (RECEPTOR LECTIN KINASE); Kinase                                                                                                                                               |



|                  |                                                |           |                                                                                                                                                                                             |
|------------------|------------------------------------------------|-----------|---------------------------------------------------------------------------------------------------------------------------------------------------------------------------------------------|
| OSJNBa0081C01.3  | Unknown Protein                                | At2g20780 | Mannitol Transporter, Putative                                                                                                                                                              |
| OSJNBa0081C01.5  | Unknown Protein                                | At2g20750 | Atexpb1 (Arabidopsis Thaliana Expansin B1)                                                                                                                                                  |
| OSJNBa0081C01.8  | Unknown Protein                                | At1g51740 | SYP81 (Syntaxin 81)                                                                                                                                                                         |
| OSJNBa0081C13.10 | Sec13p                                         | At2g30050 | Transducin Family Protein / WD-40 Repeat Family Protein                                                                                                                                     |
| OSJNBa0081C13.26 | Putative WD Repeat Domain 11                   | At3g33530 | Transducin Family Protein / WD-40 Repeat Family Protein                                                                                                                                     |
| OSJNBa0081C13.27 | Unknown Protein                                | At3g10250 | Unknown Protein                                                                                                                                                                             |
| OSJNBa0081C13.28 | Putative 50S Ribosomal Protein L3              | At2g43030 | Ribosomal Protein L3 Family Protein                                                                                                                                                         |
| OSJNBa0081C13.30 | Putative Splicing Factor 3b, Subunit 3, 130kda | At3g55220 | Splicing Factor, Putative                                                                                                                                                                   |
| OSJNBa0081L15.13 | Unknown Protein                                | At2g04660 | APC2 (Anaphase-Promoting Complex/Cyclosome 2); Ubiquitin-Protein Ligase                                                                                                                     |
| OSJNBa0081L15.14 | Unknown Protein                                | At5g50320 | ELO3 (ELONGATA 3); N-Acetyltransferase/ Catalytic/ Hydrogen Ion Transporting ATP Synthase, Rotational Mechanism / Hydrogen Ion Transporting Atpase, Rotational Mechanism / Iron Ion Binding |
| OSJNBa0081L15.18 | Unknown Protein                                | At5g40760 | G6PD6 (GLUCOSE-6-PHOSPHATE DEHYDROGENASE 6); Glucose-6-Phosphate 1-Dehydrogenase                                                                                                            |
| OSJNBa0081L15.3  | Unknown Protein                                | At3g27390 | Unknown Protein                                                                                                                                                                             |
| OSJNBa0081P02.1  | Hypothetical Protein                           | At1g25190 | Unknown Protein                                                                                                                                                                             |
| OSJNBa0081P02.15 | Putative Protein Kinase                        | At5g66790 | Protein Kinase Family Protein                                                                                                                                                               |
| OSJNBa0081P02.7  | Unknown Protein                                | At1g73500 | ATMKK9 (Arabidopsis Thaliana MAP Kinase Kinase 9); Kinase                                                                                                                                   |
| OSJNBa0082M15.18 | Putative                                       | At1g63680 | PDE316 (PIGMENT DEFECTIVE EMBRYO); ATP Binding / Ligase                                                                                                                                     |
| OSJNBa0082M15.3  | Putative Outer Envelope Protein                | At2g16640 | ATTOC132/TOC132 (MULTIMERIC TRANSLOCON COMPLEX IN THE OUTER ENVELOPE MEMBRANE 132); Transmembrane Receptor                                                                                  |
| OSJNBa0082M15.4  | Beta-Expansin                                  | At1g65680 | Atexpb2 (Arabidopsis Thaliana Expansin B2)                                                                                                                                                  |
| OSJNBa0082M15.7  | Putative WW-Domain Oxidoreductase              | At4g11410 | Short-Chain Dehydrogenase/Reductase (SDR) Family Protein                                                                                                                                    |
| OSJNBa0083F15.12 | Putative Sesquiterpene Synthase                | At5g23960 | Terpene Synthase/Cyclase Family Protein                                                                                                                                                     |
| OSJNBa0083F15.15 | Putative Ubiquitin Conjugation Factor          | At5g15400 | U-Box Domain-Containing Protein                                                                                                                                                             |
| OSJNBa0083M08.1  | Putative Trna Synthetase                       | At5g26707 | Unknown Protein                                                                                                                                                                             |
| OSJNBa0083M16.19 | Putative Receptor Kinase                       | At1g68400 | Leucine-Rich Repeat Transmembrane Protein Kinase, Putative                                                                                                                                  |
| OSJNBa0083M16.25 | Putative Endo-1,4-Beta-Xylanase X-1            | At1g10050 | Glycosyl Hydrolase Family 10 Protein / Carbohydrate-Binding Domain-Containing Protein                                                                                                       |
| OSJNBa0083M16.34 | Putative 16.9 Kda Heat Shock Protein           | At1g53540 | 17.6 Kda Class I Small Heat Shock Protein (HSP17.6C-CI) (AA 1-156)                                                                                                                          |
| OSJNBa0083N12.1  | Unknown Protein                                | At1g21230 | WAK5 (WALL ASSOCIATED KINASE 5); Kinase/ Protein Serine/Threonine Kinase                                                                                                                    |
| OSJNBa0083N12.12 | Unknown Protein                                | At3g22370 | AOX1A (Alternative Oxidase 1A); Alternative Oxidase                                                                                                                                         |
| OSJNBa0083N12.15 | Unknown Protein                                | At1g64990 | Unknown Protein                                                                                                                                                                             |
| OSJNBa0083N12.20 | Unknown Protein                                | At1g64850 | Calcium-Binding EF Hand Family Protein                                                                                                                                                      |
| OSJNBa0083N12.23 | Unknown Protein                                | At3g01390 | Vma10 (Vacuolar Membrane Atpase 10)                                                                                                                                                         |
| OSJNBa0083N12.6  | Unknown Protein                                | At1g80480 | Ptac17 (Plastid Transcriptionally Active17)                                                                                                                                                 |
| OSJNBa0083N12.7  | Unknown Protein                                | At4g33270 | CDC20.1; Signal Transducer                                                                                                                                                                  |
| OSJNBa0084A10.10 | Unknown Protein                                | At2g18540 | Cupin Family Protein                                                                                                                                                                        |

|                  |                                             |           |                                                                                                           |
|------------------|---------------------------------------------|-----------|-----------------------------------------------------------------------------------------------------------|
| OSJNBa0084A10.7  | Unknown Protein                             | At1g21760 | F-Box Family Protein                                                                                      |
| OSJNBa0084K01.10 | Unknown Protein                             | At3g51240 | F3H (TRANSPARENT TESTA 6); Naringenin 3-Dioxygenase                                                       |
| OSJNBa0084K01.13 | Unknown Protein                             | At5g13240 | Unknown Protein                                                                                           |
| OSJNBa0084K01.16 | Unknown Protein                             | At2g30000 | Unknown Protein                                                                                           |
| OSJNBa0084K01.19 | Unknown Protein                             | At5g39590 | Unknown Protein                                                                                           |
| OSJNBa0084K01.2  | Unknown Protein                             | At5g20990 | B73 (CHLORATE RESISTANT 6); Molybdenum Ion Binding                                                        |
| OSJNBa0084K01.4  | Unknown Protein                             | At5g03220 | Transcriptional Co-Activator-Related                                                                      |
| OSJNBa0084K01.5  | Unknown Protein                             | At5g05780 | Athmov34 (Asymmetric Leaves Enhancer3)                                                                    |
| OSJNBa0084K01.7  | Unknown Protein                             | At3g45380 | Unknown Protein                                                                                           |
| OSJNBa0084K11.12 | Unknown Protein                             | At4g35750 | Rho-Gtpase-Activating Protein-Related                                                                     |
| OSJNBa0084K11.14 | Unknown Protein                             | At1g20380 | Prolyl Oligopeptidase, Putative / Prolyl Endopeptidase, Putative / Post-Proline Cleaving Enzyme, Putative |
| OSJNBa0084K11.15 | Unknown Protein                             | At1g16210 | Unknown Protein                                                                                           |
| OSJNBa0084K11.2  | Unknown Protein                             | At4g00430 | TMP-C (Plasma Membrane Intrinsic Protein 1;4)                                                             |
| OSJNBa0084K11.20 | Unknown Protein                             | At1g47670 | Amino Acid Transporter Family Protein                                                                     |
| OSJNBa0084K11.4  | Unknown Protein                             | At1g01600 | CYP86A4 (Cytochrome P450, Family 86, Subfamily A, Polypeptide 4); Oxygen Binding                          |
| OSJNBa0084K11.6  | Unknown Protein                             | At3g10390 | FLD (FLOWERING LOCUS D); Amine Oxidase                                                                    |
| OSJNBa0084K11.9  | Unknown Protein                             | At1g76040 | CPK29 (Calcium-Dependent Protein Kinase 29); Calcium- And Calmodulin-Dependent Protein Kinase/ Kinase     |
| OSJNBa0084K20.14 | Unknown Protein                             | At5g36790 | Phosphoglycolate Phosphatase, Putative                                                                    |
| OSJNBa0084K20.3  | Unknown Protein                             | At1g35460 | Basic Helix-Loop-Helix (Bhlh) Family Protein                                                              |
| OSJNBa0084K20.5  | Unknown Protein                             | At1g67530 | Armadillo/Beta-Catenin Repeat Family Protein / U-Box Domain-Containing Family Protein                     |
| OSJNBa0084K20.6  | Unknown Protein                             | At5g14220 | HEMG2/MEE61 (Maternal Effect Embryo Arrest 61); Oxidoreductase/ Protoporphyrinogen Oxidase                |
| OSJNBa0084K20.9  | Unknown Protein                             | At5g14230 | Ankyrin Repeat Family Protein                                                                             |
| OSJNBa0084P08.2  | Putative Plasma Membrane Associated Protein | At1g04560 | AWPM-19-Like Membrane Family Protein                                                                      |
| OSJNBa0085I10.11 | Unknown Protein                             | At1g13270 | MAP1C (METHIONINE AMINOPEPTIDASE 1B); Metalloexopeptidase                                                 |
| OSJNBa0085I10.13 | Unknown Protein                             | At5g09400 | KUP7 (K+ Uptake Permease 7); Potassium Ion Transporter                                                    |
| OSJNBa0085I10.14 | Unknown Protein                             | At1g03475 | LIN2 (LESION INITIATION 2); Coproporphyrinogen Oxidase                                                    |
| OSJNBa0085I10.18 | Unknown Protein                             | At1g30900 | Vacuolar Sorting Receptor, Putative                                                                       |
| OSJNBa0085I10.3  | Unknown Protein                             | At1g79350 | EMB1135 (EMBRYO DEFECTIVE 1135); DNA Binding                                                              |
| OSJNBa0085K21.31 | Putative Thiosulfate Transferase            | At1g79230 | St1 (Mercaptopyruvate Sulfurtransferase 1)                                                                |
| OSJNBa0085K21.33 | Tubulin Beta Chain                          | At5g62700 | TUB3 (Tubulin Beta-3); Structural Molecule                                                                |
| OSJNBa0085K21.46 | Putative TIP120 Protein                     | At2g02560 | CAND1 (CULLIN-ASSOCIATED AND NEDDYLATION DISSOCIATED, HEMIVENATA); Binding                                |
| OSJNBa0086A10.12 | Putative Serine/Threonine-Specific Protein  | At4g24400 | Cipk8 (Cbl-Interacting Protein Kinase 8)                                                                  |
| OSJNBa0086B14.2  | Unknown Protein                             | At5g65400 | Unknown Protein                                                                                           |

|                   |                                                 |           |                                                                                                       |
|-------------------|-------------------------------------------------|-----------|-------------------------------------------------------------------------------------------------------|
| OSJNBa0086B14.22  | Unknown Protein                                 | At1g34750 | Protein Phosphatase 2C, Putative / PP2C, Putative                                                     |
| OSJNBa0086B14.23  | Unknown Protein                                 | At4g08920 | Cry1 (Cryptochrome 1, Out Of Phase 2)                                                                 |
| OSJNBa0086B14.3   | Unknown Protein                                 | At5g09450 | Pentatricopeptide (PPR) Repeat-Containing Protein                                                     |
| OSJNBa0086F04.36  | Putative Fertility Restorer Homologue           | At5g01110 | Pentatricopeptide (PPR) Repeat-Containing Protein                                                     |
| OSJNBa0086F04.42  | Putative Farnesylated Protein                   | At1g22990 | Heavy-Metal-Associated Domain-Containing Protein / Copper Chaperone (CCH)-Related                     |
| OSJNBa0086N05.101 | Unknown Protein                                 | At5g01750 | Unknown Protein                                                                                       |
| OSJNBa0086N05.115 | Putative Amino Acid Transport Protein           | At3g11900 | ANT1 (AROMATIC AND NEUTRAL TRANSPORTER 1); Amino Acid Permease/ Amino Acid Transporter                |
| OSJNBa0086N11.18  | Putative Glutathione Transferase                | At5g45020 | Unknown Protein                                                                                       |
| OSJNBa0086N11.31  | Putative Iron/Ascorbate-Dependent               | At5g54000 | Oxidoreductase, 2OG-Fe(II) Oxygenase Family Protein                                                   |
| OSJNBa0086O06.1   | Unknown Protein                                 | At3g60160 | ATMRP9 (Arabidopsis Thaliana Multidrug Resistance-Associated Protein 9)                               |
| OSJNBa0086O06.10  | Unknown Protein                                 | At1g78800 | Glycosyl Transferase Family 1 Protein                                                                 |
| OSJNBa0086O06.11  | Unknown Protein                                 | At3g19380 | U-Box Domain-Containing Protein                                                                       |
| OSJNBa0086O06.12  | Unknown Protein                                 | At1g32560 | Late Embryogenesis Abundant Group 1 Domain-Containing Protein / LEA Group 1 Domain-Containing Protein |
| OSJNBa0086O06.18  | Unknown Protein                                 | At5g59450 | Scarecrow-Like Transcription Factor 11 (SCL11)                                                        |
| OSJNBa0086O06.23  | Unknown Protein                                 | At1g43000 | Zinc-Binding Family Protein                                                                           |
| OSJNBa0086P08.13  | Putative Branched-Chain Amino Acid              | At5g57850 | Aminotransferase Class IV Family Protein                                                              |
| OSJNBa0086P08.14  | Hypothetical Protein                            | At4g28440 | DNA-Binding Protein-Related                                                                           |
| OSJNBa0086P08.22  | Putative Heat Shock Protein 40                  | At4g28480 | Heat Shock Protein Binding / Unfolded Protein Binding                                                 |
| OSJNBa0087C10.12  | Putative RNA Helicase                           | At3g18600 | DEAD/DEAH Box Helicase, Putative                                                                      |
| OSJNBa0087C10.14  | Putative AAA-Type Atpase                        | At3g28580 | AAA-Type Atpase Family Protein                                                                        |
| OSJNBa0087C10.22  | Unknow Protein                                  | At5g23330 | Riboflavin Biosynthesis Protein-Related                                                               |
| OSJNBa0087C10.23  | Putative Vacuolar Protein Sorting-Associated    | At1g75850 | Unknown Protein                                                                                       |
| OSJNBa0087C10.4   | Putative Oxidoreductase                         | At3g28480 | Oxidoreductase, 2OG-Fe(II) Oxygenase Family Protein                                                   |
| OSJNBa0087C10.9   | Synaptobrevin-Like Protein                      | At1g04750 | Vamp7b (Vesicle-Associated Membrane Protein 7b)                                                       |
| OSJNBa0087F21.31  | Putative Plasma Membrane H <sup>+</sup> -Atpase | At2g18960 | AHA1 (PLASMA MEMBRANE PROTON ATPASE); Atpase                                                          |
| OSJNBa0087G11.19  | Putative 1,3-Beta-Glucanase                     | At5g20870 | Glycosyl Hydrolase Family 17 Protein                                                                  |
| OSJNBa0087G11.20  | Putative Pre-Mrna Splicing Factor               | At1g10580 | Transducin Family Protein / WD-40 Repeat Family Protein                                               |
| OSJNBa0087G11.4   | Unknown Protein                                 | At4g33160 | F-Box Family Protein (FBX13)                                                                          |
| OSJNBa0087M10.1   | Ribosomal Protein L15                           | At4g17390 | 60S Ribosomal Protein L15 (RPL15B)                                                                    |
| OSJNBa0087M10.16  | Putative Pentatricopeptide Repeat Protein       | At3g53700 | MEE40 (Maternal Effect Embryo Arrest 40); Binding                                                     |
| OSJNBa0087M10.8   | Putative ACT Domain Repeat Protein              | At1g69040 | ACR4 (ACT REPEAT 4); Amino Acid Binding                                                               |
| OSJNBa0087O09.19  | Putative Aldehyde Oxidase                       | At5g20960 | Aao1 (Aldehyde Oxidase 1)                                                                             |
| OSJNBa0087O24.20  | Unknown Protein                                 | At5g65930 | ZWI (ZWICHEL); Calmodulin Binding / Microtubule Motor                                                 |
| OSJNBa0087O24.21  | Unknown Protein                                 | At1g78690 | Phospholipid/Glycerol Acyltransferase Family Protein                                                  |

|                  |                                        |           |                                                                                                          |
|------------------|----------------------------------------|-----------|----------------------------------------------------------------------------------------------------------|
| OSJNBa0087O24.6  | Unknown Protein                        | At5g55280 | FTSZ1-1 (Ftsz1-1); Structural Molecule                                                                   |
| OSJNBa0088A01.11 | Unknown Protein                        | At5g13770 | Pentatricopeptide (PPR) Repeat-Containing Protein                                                        |
| OSJNBa0088A01.16 | Unknown Protein                        | At5g56320 | Atexpa14 (Arabidopsis Thaliana Expansin A14)                                                             |
| OSJNBa0088H09.1  | Unknown Protein                        | At5g41180 | Leucine-Rich Repeat Protein Kinase, Putative                                                             |
| OSJNBa0088H09.10 | Unknown Protein                        | At2g36060 | Mmz3 (Mms Zwei Homologe 3)                                                                               |
| OSJNBa0088H09.11 | Unknown Protein                        | At5g22250 | CCR4-NOT Transcription Complex Protein, Putative                                                         |
| OSJNBa0088H09.15 | Unknown Protein                        | At3g11650 | NHL2 (NDR1/HIN1-Like 2)                                                                                  |
| OSJNBa0088H09.16 | Unknown Protein                        | At3g11660 | NHL1 (NDR1/HIN1-Like 1)                                                                                  |
| OSJNBa0088H09.18 | Unknown Protein                        | At5g03540 | (EXOCYST SUBUNIT EXO70 FAMILY PROTEIN A1); Protein Binding                                               |
| OSJNBa0088H09.2  | Unknown Protein                        | At3g48990 | AMP-Dependent Synthetase And Ligase Family Protein                                                       |
| OSJNBa0088H09.3  | Unknown Protein                        | At4g11610 | NTRB (NADPH-Dependent Thioredoxin Reductase B)                                                           |
| OSJNBa0088H09.6  | Unknown Protein                        | At5g41260 | Protein Kinase Family Protein                                                                            |
| OSJNBa0088I06.1  | Putative 60S Ribosomal Protein L30     | At3g18740 | 60S Ribosomal Protein L30 (RPL30C)                                                                       |
| OSJNBa0088I06.10 | Unknown Protein                        | At5g21170 | AMP-Activated Protein Kinase                                                                             |
| OSJNBa0088I06.13 | Hypothetical Protein                   | At5g19360 | CPK34 (Calcium-Dependent Protein Kinase 34); Calcium- And Calmodulin-Dependent Protein Kinase/ Kinase    |
| OSJNBa0088I06.19 | Hypothetical Protein                   | At5g06150 | CYC1BAT (CYCLIN B 1;2); Cyclin-Dependent Protein Kinase Regulator                                        |
| OSJNBa0088I06.20 | Putative Nodulin Mtn21 Protein         | At5g07050 | Nodulin Mtn21 Family Protein                                                                             |
| OSJNBa0088I06.5  | 'Unknown Protein, Conatins SET Domain' | At5g04940 | Suvh1 (Su(Var)3-9 Homolog 1)                                                                             |
| OSJNBa0088I06.9  | Putative Calmodulin                    | At5g37780 | CAM1 (CALMODULIN 1); Calcium Ion Binding                                                                 |
| OSJNBa0088I22.12 | Unknown Protein                        | At1g12740 | CYP87A2 (Cytochrome P450, Family 87, Subfamily A, Polypeptide 2); Oxygen Binding                         |
| OSJNBa0088I22.7  | Unknown Protein                        | At5g52120 | ATPP2-A14 (Phloem Protein 2-A14)                                                                         |
| OSJNBa0088K19.13 | Unknown Protein                        | At1g72090 | Radical SAM Domain-Containing Protein / TRAM Domain-Containing Protein                                   |
| OSJNBa0088M05.16 | Putative Annexin                       | At2g38760 | ANNAT3 (ANNEXIN 3, ANNEXIN ARABIDOPSIS 3); Calcium Ion Binding / Calcium-Dependent Phospholipid Binding  |
| OSJNBa0088M06.1  | Unknown Protein                        | At1g56130 | Leucine-Rich Repeat Family Protein / Protein Kinase Family Protein;                                      |
| OSJNBa0088O14.4  | Pathogenesis-Related Protein 1         | At3g19690 | Pathogenesis-Related Protein, Putative                                                                   |
| OSJNBa0089K21.2  | Unknown Protein                        | At4g02840 | Small Nuclear Ribonucleoprotein D1, Putative / Snrnp Core Protein D1, Putative / Sm Protein D1, Putative |
| OSJNBa0089K21.6  | Unknown Protein                        | At5g23810 | AAP7 (Amino Acid Permease 7)                                                                             |
| OSJNBa0089K24.1  | Putative Peroxidase                    | At2g41480 | Peroxidase                                                                                               |
| OSJNBa0089K24.15 | Putative MRP-Like ABC Transporter      | At3g13080 | ATMRP3 (Arabidopsis Thaliana Multidrug Resistance-Associated Protein 3)                                  |
| OSJNBa0089K24.24 | Unknown Protein                        | At5g20060 | Carboxylic Ester Hydrolase                                                                               |
| OSJNBa0089K24.3  | Hypothetical Protein                   | At1g24090 | Rnase H Domain-Containing Protein                                                                        |
| OSJNBa0089N06.12 | Unknown Protein                        | At3g21820 | SET Domain-Containing Protein                                                                            |
| OSJNBa0089N06.26 | Unknown Protein                        | At1g61720 | Ban (Banyuls)                                                                                            |

|                  |                                                |           |                                                                                                                                                                     |
|------------------|------------------------------------------------|-----------|---------------------------------------------------------------------------------------------------------------------------------------------------------------------|
| OSJNBa0089N06.6  | Unknown Protein                                | At3g01190 | Peroxidase 27 (PER27) (P27) (PRXR7)                                                                                                                                 |
| OSJNBa0090H18.25 | Putative Chaperonin Containing TCP1, Subunit 3 | At5g26360 | Chaperonin, Putative                                                                                                                                                |
| OSJNBa0090H18.33 | Putative Drought-Induced Protein RDI           | At1g53210 | Sodium/Calcium Exchanger Family Protein / Calcium-Binding EF Hand Family Protein                                                                                    |
| OSJNBa0090L05.7  | Hypothetical Protein                           | At1g64140 | Unknown Protein                                                                                                                                                     |
| OSJNBa0090O10.11 | Hypothetical Protein                           | At2g40780 | RNA Binding / Translation Initiation Factor                                                                                                                         |
| OSJNBa0090O10.18 | Putative Transporter                           | At1g64650 | Unknown Protein                                                                                                                                                     |
| OSJNBa0090O10.21 | Hypothetical Protein                           | At1g01220 | GHMP Kinase-Related                                                                                                                                                 |
| OSJNBa0090O10.22 | Hypothetical Protein                           | At3g13230 | Nucleic Acid Binding                                                                                                                                                |
| OSJNBa0090O10.25 | Hypothetical Protein                           | At4g24050 | Short-Chain Dehydrogenase/Reductase (SDR) Family Protein                                                                                                            |
| OSJNBa0091C07.1  | Unknown Protein                                | At1g74580 | Pentatricopeptide (PPR) Repeat-Containing Protein                                                                                                                   |
| OSJNBa0091C12.3  | Unknown Protein                                | At4g38580 | ATFP6 (FARNESYLATED PROTEIN 6); Metal Ion Binding                                                                                                                   |
| OSJNBa0091C16.21 | Lipase Class 3-Like                            | At3g07400 | Lipase Class 3 Family Protein                                                                                                                                       |
| OSJNBa0091C18.37 | Putative Actin Related Protein 2               | At3g27000 | ARP2 (WURM); Structural Constituent Of Cytoskeleton                                                                                                                 |
| OSJNBa0091C18.39 | Hypothetical Protein                           | At5g25790 | Transcription Factor                                                                                                                                                |
| OSJNBa0091D06.12 | Unknown Protein                                | At2g01660 | 33 Kda Secretory Protein-Related                                                                                                                                    |
| OSJNBa0091D06.17 | Unknown Protein                                | At3g43630 | Nodulin, Putative                                                                                                                                                   |
| OSJNBa0091E13.20 | Hypothetical Protein                           | At3g19540 | Unknown Protein                                                                                                                                                     |
| OSJNBa0091E23.2  | Rice Pathogenesis-Related Protein Class 1      | At4g33720 | Pathogenesis-Related Protein, Putative                                                                                                                              |
| OSJNBa0091E23.5  | Putative Benzoyltransferase                    | At1g27620 | Transferase Family Protein                                                                                                                                          |
| OSJNBa0091J19.1  | Putative Inosine Monophosphate Dehydrogenase   | At1g16350 | Inosine-5'-Monophosphate Dehydrogenase, Putative                                                                                                                    |
| OSJNBa0091J19.10 | Unknown Protein                                | At5g44450 | Unknown Protein                                                                                                                                                     |
| OSJNBa0091J19.11 | Putative Actin-Depolymerizing Factor           | At2g31200 | ADF6 (ACTIN DEPOLYMERIZING FACTOR 6); Actin Binding                                                                                                                 |
| OSJNBa0091J19.14 | Hypothetical Protein                           | At3g12870 | Unknown Protein                                                                                                                                                     |
| OSJNBa0091J19.15 | Putative Fatty Acid Hydroxylase                | At4g20870 | Fatty Acid Hydroxylase, Putative                                                                                                                                    |
| OSJNBa0091J19.7  | Unknown Protein                                | At3g10260 | Reticulon Family Protein                                                                                                                                            |
| OSJNBa0091J19.9  | Putative GTP-Binding Protein                   | At1g56050 | GTP-Binding Protein-Related                                                                                                                                         |
| OSJNBa0091P11.1  | Sucrose Transporter, 5'-Partial                | At1g09960 | SUT4 (SUCROSE TRANSPORTER 4); Carbohydrate Transporter/ Sucrose:Hydrogen Symporter/ Sugar Porter                                                                    |
| OSJNBa0091P11.10 | Ribulose-5-Phosphate-3-Epimerase               | At5g61410 | RPE (EMBRYO DEFECTIVE 2728); Ribulose-Phosphate 3-Epimerase                                                                                                         |
| OSJNBa0091P11.12 | Putative Plant Cytochrome P-450 Protein        | At1g69500 | Oxygen Binding                                                                                                                                                      |
| OSJNBa0091P11.14 | Putative Male Sterility Protein                | At3g11980 | Ms2 (Male Sterility 2)                                                                                                                                              |
| OSJNBa0091P11.22 | Putative Pentatricopeptide Repeat Containing   | At5g56310 | Pentatricopeptide (PPR) Repeat-Containing Protein                                                                                                                   |
| OSJNBa0091P11.24 | Putative Auxin Independent Growth-Related      | At2g03280 | Unknown Protein                                                                                                                                                     |
| OSJNBa0091P11.6  | Unknown Protein                                | At3g28760 | Unknown Protein                                                                                                                                                     |
| OSJNBa0092M19.24 | Putative Glycosyl Transferase                  | At1g19300 | GATL1/GLZ1/PARVUS (Galacturonosyltransferase-Like 1); Polygalacturonate 4-Alpha-Galacturonosyltransferase/ Transferase, Transferring Glycosyl Groups / Transferase, |

|                  |                                               |           |                                                                                                            |
|------------------|-----------------------------------------------|-----------|------------------------------------------------------------------------------------------------------------|
| OSJNBa0092M19.27 | Putative Vacuolar Protein Sorting-Associated  | At5g53530 | Transferring Hexosyl Groups                                                                                |
| OSJNBa0092M19.3  | Hypothetical Protein                          | At4g16010 | Vacuolar Protein Sorting-Associated Protein 26, Putative / VPS26, Putative                                 |
| OSJNBa0092N12.12 | Putative Receptor-Like Protein Kinase         | At2g01950 | Transposable Element Gene                                                                                  |
| OSJNBa0093F16.23 | Auxin Response Factor 2                       | At5g20730 | BRL2 (BRI1-LIKE 2); ATP Binding / Protein Serine/Threonine Kinase                                          |
| OSJNBa0093M23.10 | Germin-Like Protein                           | At1g09560 | NPH4 (NON-PHOTOTROPIC HYPOCOTYL); Transcription Factor                                                     |
| OSJNBa0093O08.1  | Unknown Protein                               | At1g56130 | GLP5 (GERMIN-LIKE PROTEIN 5); Manganese Ion Binding / Metal Ion Binding / Nutrient Reservoir               |
| OSJNBa0093O08.12 | Unknown Protein                               | At4g14630 | Leucine-Rich Repeat Family Protein / Protein Kinase Family Protein;                                        |
| OSJNBa0093O08.13 | Unknown Protein                               | At3g14580 | GLP9 (GERMIN-LIKE PROTEIN 9); Manganese Ion Binding / Metal Ion Binding / Nutrient Reservoir               |
| OSJNBa0093P23.1  | Unknown Protein                               | At2g13610 | Pentatricopeptide (PPR) Repeat-Containing Protein                                                          |
| OSJNBa0094F01.1  | Putative 40S Ribosomal Protein S15            | At5g09510 | ABC Transporter Family Protein                                                                             |
| OSJNBa0094F01.10 | Unknown Protein                               | At1g04230 | 40S Ribosomal Protein S15 (RPS15D)                                                                         |
| OSJNBa0094F01.18 | Putative Indole-3-Glycerol Phosphate Lyase    | At4g02610 | Unknown Protein                                                                                            |
| OSJNBa0094F01.24 | Putative 60S Ribosomal Protein L1             | At3g09630 | Tryptophan Synthase, Alpha Subunit, Putative                                                               |
| OSJNBa0094H06.16 | Unknown Protein                               | At1g71050 | Structural Constituent Of Ribosome                                                                         |
| OSJNBa0094J08.10 | Unknown Protein                               | At3g11030 | Heavy-Metal-Associated Domain-Containing Protein / Copper Chaperone (CCH)-Related                          |
| OSJNBa0094J08.18 | Putative Amino Acid Transporter               | At5g16740 | Steroid Hormone Receptor/ Transcription Factor                                                             |
| OSJNBa0094J08.21 | Putative Polyprotein                          | At4g03810 | Amino Acid Transporter Family Protein                                                                      |
| OSJNBa0094J08.24 | Hypothetical Protein                          | At1g68930 | Retrotransposon Protein                                                                                    |
| OSJNBa0094J08.29 | Putative Protein Kinase                       | At3g27560 | Pentatricopeptide (PPR) Repeat-Containing Protein                                                          |
| OSJNBa0094J08.6  | Putative Cinnamoyl-Coa Reductase              | At5g58490 | ATN1; Kinase/ Protein Threonine/Tyrosine Kinase                                                            |
| OSJNBa0094J08.7  | Putative Multiple Inositol Polyphosphate      | At1g09870 | Cinnamoyl-Coa Reductase Family                                                                             |
| OSJNBa0094J09.17 | Putative Protein                              | At3g63220 | Histidine Acid Phosphatase Family Protein                                                                  |
| OSJNBa0094P09.18 | Unknown Protein                               | At1g17200 | Kelch Repeat-Containing F-Box Family Protein                                                               |
| OSJNBa0095C06.17 | Putative Pyridoxamine 5-Phosphate Oxidase     | At5g49970 | Integral Membrane Family Protein                                                                           |
| OSJNBa0095C07.1  | Putative Beta-Phosphoglucomutase              | At2g38740 | Pyridoxamine 5'-Phosphate Oxidase-Related                                                                  |
| OSJNBa0095C07.3  | Putative Eukaryotic Initiation Factor Subunit | At5g27640 | Haloacid Dehalogenase-Like Hydrolase Family Protein                                                        |
| OSJNBa0095C07.4  | Putative Nuclear Protein                      | At2g44525 | TIF3B1 (EUKARYOTIC TRANSLATION INITIATION FACTOR 3B); Nucleic Acid Binding / Translation Initiation Factor |
| OSJNBa0095C07.5  | Putative Pyruvate Kinase                      | At1g32440 | Unknown Protein                                                                                            |
| OSJNBa0095C07.6  | Putative Protein Kinase                       | At4g35470 | Pyruvate Kinase, Putative                                                                                  |
| OSJNBa0095C07.6  | Putative Protein Kinase                       | At5g46570 | Leucine-Rich Repeat Family Protein                                                                         |
| OSJNBa0095C07.8  | Putative Leucine-Rich Repeat Protein          | At3g07010 | Protein Kinase Family Protein                                                                              |
| OSJNBa0095H06.5  | Unknown Protein                               | At1g66510 | Pectate Lyase Family Protein                                                                               |
|                  |                                               |           | AAR2 Protein Family                                                                                        |

|                  |                                       |           |                                                                                                             |
|------------------|---------------------------------------|-----------|-------------------------------------------------------------------------------------------------------------|
| OSJNBa0095H06.6  | Unknown Protein                       | At3g24240 | Leucine-Rich Repeat Transmembrane Protein Kinase, Putative                                                  |
| OSJNBa0095N06.18 | Putative MATE Efflux Family Protein   | At3g21690 | MATE Efflux Family Protein                                                                                  |
| OSJNBa0096E22.2  | Hypothetical Protein                  | At3g49790 | ATP Binding                                                                                                 |
| OSJNBa0096F01.13 | Unknown Protein                       | At2g47140 | Short-Chain Dehydrogenase/Reductase (SDR) Family Protein                                                    |
| OSJNBa0096F01.2  | Unknown Protein                       | At5g43530 | SNF2 Domain-Containing Protein / Helicase Domain-Containing Protein / RING Finger Domain-Containing Protein |
| OSJNBa0096F01.6  | Unknown Protein                       | At5g43500 | ATARP9 (ACTIN-RELATED PROTEIN 9); Protein Binding                                                           |
| OSJNBa0096F01.8  | Unknown Protein                       | At3g26290 | CYP71B26 (Cytochrome P450, Family 71, Subfamily B, Polypeptide 26); Oxygen Binding                          |
| OSJNBa0096I06.11 | Putative Ferredoxin                   | At1g10960 | ATFD1 (FERREDOXIN 1); Electron Carrier/ Iron Ion Binding                                                    |
| OSJNBa0096I06.14 | Putative Transcription Factor         | At3g05420 | ACBP4 (ACYL-COA BINDING PROTEIN 4, ACYL-COA-BINDING DOMAIN 4); Acyl-Coa Binding                             |
| OSJNBa0096I06.26 | Putative Deoxycytidine Deaminase      | At5g28050 | Hydrolase/ Zinc Ion Binding                                                                                 |
| OSJNBa0096I06.27 | Putative Polygalacturonase            | At3g62110 | Glycoside Hydrolase Family 28 Protein / Polygalacturonase (Pectinase) Family Protein                        |
| OSJNBa0096I06.33 | Putative Hydroxysteroiddehydrogenase  | At3g29260 | Short-Chain Dehydrogenase/Reductase (SDR) Family Protein                                                    |
| OSJNBb0002J01.12 | Las17 Binding Protein-Like            | At3g43230 | Zinc Finger (FYVE Type) Family Protein                                                                      |
| OSJNBb0002J11.14 | Unknown Protein                       | At4g28740 | Unknown Protein                                                                                             |
| OSJNBb0002J11.20 | Unknown Protein                       | At3g04290 | ATLTL1/LTL1 (LI-TOLERANT LIPASE 1); Carboxylic Ester Hydrolase                                              |
| OSJNBb0002J11.22 | Unknown Protein                       | At5g63010 | WD-40 Repeat Family Protein                                                                                 |
| OSJNBb0002N06.2  | Unknown Protein                       | At3g42100 | AT Hook Motif-Containing Protein-Related                                                                    |
| OSJNBb0003A12.10 | Unknown Protein                       | At2g38940 | ATPT2 (PHOSPHATE TRANSPORTER 2); Carbohydrate Transporter/ Phosphate Transporter/ Sugar Porter              |
| OSJNBb0003A12.6  | Unknown Protein                       | At2g32830 | PHT5 (Phosphate Transporter 5); Inorganic Phosphate Transporter/ Phosphate Transporter                      |
| OSJNBb0003E08.13 | Putative Nitrate Transporter NRT1-5   | At5g62680 | Proton-Dependent Oligopeptide Transport (POT) Family Protein                                                |
| OSJNBb0003E08.15 | Putative Thioredoxin                  | At5g39950 | ATTRX2 (Arabidopsis Thioredoxin H2, Thioredoxin H-Type 1); Thiol-Disulfide Exchange Intermediate            |
| OSJNBb0003E08.20 | Plasma Membrane H+ Atpase             | At5g62670 | AHA11 (ARABIDOPSIS H(+)-ATPASE 11); Atpase                                                                  |
| OSJNBb0003E08.26 | Putative Pentatricopeptide (PPR)      | At1g59720 | Pentatricopeptide (PPR) Repeat-Containing Protein                                                           |
| OSJNBb0003H03.24 | Aspartate Carbamoyltransferase        | At3g20330 | Aspartate Carbamoyltransferase, Chloroplast / Aspartate Transcarbamylase / Atcase (PYRB)                    |
| OSJNBb0003H03.27 | Putative ADP-Ribosylation Factor 3    | At5g14670 | ATARFA1B (ADP-Ribosylation Factor A1B); GTP Binding / Phospholipase Activator/ Protein Binding              |
| OSJNBb0003H22.12 | Putative Pectin-Glucuronyltransferase | At5g61840 | GUT1; Catalytic                                                                                             |
| OSJNBb0003H22.2  | Mutt-Like Protein                     | At3g26690 | ATNUDT13 (ARABIDOPSIS THALIANA NUDIX HYDROLASE HOMOLOG 13); Hydrolase                                       |
| OSJNBb0004A06.10 | Unknown Protein                       | At3g21380 | Unknown Protein                                                                                             |
| OSJNBb0004A17.1  | Unknown Protein                       | At1g65840 | ATPAO4 (POLYAMINE OXIDASE 4); Amine Oxidase                                                                 |
| OSJNBb0004A17.12 | Unknown Protein                       | At1g10820 | Unknown Protein                                                                                             |
| OSJNBb0004A17.3  | Unknown Protein                       | At3g02720 | DJ-1 Family Protein / Protease-Related                                                                      |
| OSJNBb0004A17.6  | Unknown Protein                       | At2g02220 | ATPSKR1 (PHYTOSULFOKIN RECEPTOR 1); ATP Binding / Peptide Receptor/ Protein Serine/Threonine Kinase         |

|                   |                                                   |           |                                                                                                     |
|-------------------|---------------------------------------------------|-----------|-----------------------------------------------------------------------------------------------------|
| OSJNBb0004A17.9   | Unknown Protein                                   | At3g50420 | Pentatricopeptide (PPR) Repeat-Containing Protein                                                   |
| OSJNBb0004G23.3   | Unknown Protein                                   | At2g46890 | Oxidoreductase                                                                                      |
| OSJNBb0004G23.4   | Unknown Protein                                   | At1g18010 | Unknown Protein                                                                                     |
| OSJNBb0004M10.7   | Putative Myosin Heavy Chain-Like                  | At2g26570 | Unknown Protein                                                                                     |
| OSJNBb0005B05.10  | Unknown Protein                                   | At2g44210 | Unknown Protein                                                                                     |
| OSJNBb0005F01.1   | Putative Helicase                                 | At1g72680 | Cinnamyl-Alcohol Dehydrogenase, Putative                                                            |
| OSJNBb0005G07.107 | Putative Lateral Organ Boundaries (LOB) Domain    | At2g30340 | LOB Domain Protein 13 / Lateral Organ Boundaries Domain Protein 13 (LBD13)                          |
| OSJNBb0005G07.112 | Putative Short-Root Transcription Factor          | At3g49950 | Scarecrow Transcription Factor Family Protein                                                       |
| OSJNBb0005G07.114 | Putative WD Repeat Protein                        | At5g66240 | Transducin Family Protein / WD-40 Repeat Family Protein                                             |
| OSJNBb0005J14.19  | Putative Glutathione S-Transferase                | At1g10360 | ATGSTU18 (GLUTATHIONE S-TRANSFERASE 29); Glutathione Transferase                                    |
| OSJNBb0005J14.27  | Cytochrome P450-Like Protein                      | At2g45510 | CYP704A2 (Cytochrome P450, Family 704, Subfamily A, Polypeptide 2); Oxygen Binding                  |
| OSJNBb0005J14.3   | Putative Serine Protease                          | At1g04110 | SDD1 (STOMATAL DENSITY AND DISTRIBUTION); Subtilase                                                 |
| OSJNBb0006H05.17  | Hypothetical Protein                              | At5g24710 | Unknown Protein                                                                                     |
| OSJNBb0006H05.29  | NADP-Specific Isocitrate Dehydrogenase            | At1g65930 | Isocitrate Dehydrogenase, Putative / NADP+ Isocitrate Dehydrogenase, Putative                       |
| OSJNBb0006L01.1   | Unknown Protein                                   | At1g06650 | 2-Oxoglutarate-Dependent Dioxygenase, Putative                                                      |
| OSJNBb0006L01.3   | Unknown Protein                                   | At5g47020 | Glycine-Rich Protein                                                                                |
| OSJNBb0006L01.7   | Unknown Protein                                   | At1g59520 | Cw7                                                                                                 |
| OSJNBb0006L10.23  | Scramblase-Like                                   | At2g04940 | Scramblase-Related                                                                                  |
| OSJNBb0006L10.5   | Putative Spermine Synthase                        | At5g19530 | Acl5 (Acaulis 5)                                                                                    |
| OSJNBb0006N15.11  | Unknown Protein                                   | At1g24360 | 3-Oxoacyl-(Acyl-Carrier Protein) Reductase, Chloroplast / 3-Ketoacyl-Acyl Carrier Protein Reductase |
| OSJNBb0006N15.13  | Unknown Protein                                   | At1g10840 | TIF3H1 (Eukaryotic Translation Initiation Factor 3 Subunit H1); Translation Initiation Factor       |
| OSJNBb0006N15.8   | Unknown Protein                                   | At5g02610 | 60S Ribosomal Protein L35 (RPL35D)                                                                  |
| OSJNBb0006O08.13  | Unknown Protein                                   | At5g46720 | Unknown Protein                                                                                     |
| OSJNBb0006O08.14  | Putative Zinc Finger Protein                      | At5g46750 | AGD8 (ARF-GAP DOMAIN 8); DNA Binding                                                                |
| OSJNBb0006O08.2   | Putative Cleavage And Polyadenylation Specificity | At1g61010 | Hydrolase                                                                                           |
| OSJNBb0007E22.1   | Putative NPH3 Family Protein                      | At2g14820 | Phototropic-Responsive NPH3 Family Protein                                                          |
| OSJNBb0007E22.16  | Putative Aldo/Keto Reductase Family Protein       | At1g04420 | Aldo/Keto Reductase Family Protein                                                                  |
| OSJNBb0007E22.7   | Putative Serpin                                   | At1g47710 | Serpin, Putative / Serine Protease Inhibitor, Putative                                              |
| OSJNBb0008A05.2   | Unknown Protein                                   | At3g29240 | Unknown Protein                                                                                     |
| OSJNBb0008A05.25  | Putative Beta-Galactosidase                       | At5g20710 | BGAL7 (Beta-Galactosidase 7); Beta-Galactosidase                                                    |
| OSJNBb0008A05.9   | Putative Mevalonate Kinase                        | At5g27450 | MK/MVK; Mevalonate Kinase                                                                           |
| OSJNBb0008D07.22  | Hypothetical Protein, Similar To Oryza            | At5g27370 | Unknown Protein                                                                                     |
| OSJNBb0009C07.1   | Unknown Protein                                   | At2g45620 | Nucleotidyltransferase Family Protein                                                               |
| OSJNBb0009C07.2   | Putative Transcription Initiation Factor          | At4g12610 | ATRAP74/RAP74; Transcription Initiation Factor                                                      |



|                    |                                             |           |                                                                                                                  |
|--------------------|---------------------------------------------|-----------|------------------------------------------------------------------------------------------------------------------|
| OSJNBb0011A08.1    | Putative RNase                              | At3g01410 | Rnase H Domain-Containing Protein                                                                                |
| OSJNBb0011A08.13   | Putative Helicase                           | At3g30560 | Transposable Element Gene                                                                                        |
| OSJNBb0011A08.2    | Putative Thiolase                           | At2g33150 | PED1 (PEROXISOME DEFECTIVE 1); Acetyl-Coa C-Acyltransferase                                                      |
| OSJNBb0011H13.18   | Putative P-Type Atpase                      | At1g10130 | ECA3 (ENDOPLASMIC RETICULUM-TYPE CALCIUM-TRANSPORTING ATPASE 3); Calcium-Transporting Atpase/ Calmodulin Binding |
| OSJNBb0011H13.3    | Unknown Protein                             | At1g17870 | Unknown Protein                                                                                                  |
| OSJNBb0011H15.39-1 | Putative NADPH-Dependent Reductase          | At4g35250 | Vestitone Reductase-Related                                                                                      |
| OSJNBb0011H15.4    | Putative Auxin Induced Protein              | At1g29430 | Auxin-Responsive Family Protein                                                                                  |
| OSJNBb0011H15.42   | Putative MYST1                              | At4g24430 | Lyase                                                                                                            |
| OSJNBb0011J16.13   | Expressed Protein                           | At4g21170 | Pentatricopeptide (PPR) Repeat-Containing Protein                                                                |
| OSJNBb0011N17.14   | Unknown Protein                             | At5g55370 | Long-Chain-Alcohol O-Fatty-Acyltransferase Family Protein / Wax Synthase Family Protein                          |
| OSJNBb0011N17.16   | Unknown Protein                             | At5g61640 | PMSR1 (PEPTIDEMETHIONINE SULFOXIDE REDUCTASE 1); Protein-Methionine-S-Oxide Reductase                            |
| OSJNBb0011N17.19   | Unknown Protein                             | At3g03420 | Ku70-Binding Family Protein                                                                                      |
| OSJNBb0011N17.9    | Unknown Protein                             | At3g01660 | Methyltransferase                                                                                                |
| OSJNBb0012A20.13   | Unknown Protein                             | At1g52200 | Unknown Protein                                                                                                  |
| OSJNBb0012A20.16   | Putative Endosomal Protein                  | At1g14670 | Endomembrane Protein 70, Putative                                                                                |
| OSJNBb0012A20.18   | Putative NADPH-Dependent Oxidoreductase     | At1g59960 | Aldo/Keto Reductase, Putative                                                                                    |
| OSJNBb0012E08.10   | Unknown Protein                             | At5g61790 | Calnexin 1 (CNX1)                                                                                                |
| OSJNBb0012E08.6    | Unknown Protein                             | At1g37110 | Transposable Element Gene; Copia-Like Retrotransposon Family,                                                    |
| OSJNBb0012E08.8    | Unknown Protein                             | At3g26680 | Snm1 (Sensitive To Nitrogen Mustard 1)                                                                           |
| OSJNBb0012E24.2    | Unknown Protein                             | At3g47420 | Glycerol-3-Phosphate Transporter, Putative / Glycerol 3-Phosphate Permease, Putative                             |
| OSJNBb0012E24.3    | Unknown Protein                             | At1g60170 | Emb1220 (Embryo Defective 1220)                                                                                  |
| OSJNBb0012E24.4    | Unknown Protein                             | At2g45540 | WD-40 Repeat Family Protein / Beige-Related                                                                      |
| OSJNBb0012E24.7    | Unknown Protein                             | At4g11640 | ATSR (ARABIDOPSIS THALIANA SIGNAL-RESPONSIVE); Serine Racemase                                                   |
| OSJNBb0012E24.9    | Unknown Protein                             | At4g11600 | ATGPX6 (GLUTATHIONE PEROXIDASE 6); Glutathione Peroxidase                                                        |
| OSJNBb0012I09.11   | Putative SKP1                               | At4g34210 | ASK11 (ARABIDOPSIS SKP1-LIKE 11); Ubiquitin-Protein Ligase                                                       |
| OSJNBb0012J10.18   | Putative ADH Glutamate Dehydrogenase        | At5g07440 | GDH2 (GLUTAMATE DEHYDROGENASE 2); Oxidoreductase                                                                 |
| OSJNBb0012J10.19   | Unknown Protein                             | At5g51170 | Unknown Protein                                                                                                  |
| OSJNBb0013J13.11   | Unknown Protein                             | At5g35820 | Transposable Element Gene                                                                                        |
| OSJNBb0013K01.1    | Putative Replication Factor C 36kda Subunit | At1g77470 | Replication Factor C 36 Kda, Putative                                                                            |
| OSJNBb0013K01.36   | Replication Protein A 70kda                 | At2g06510 | Replication Protein, Putative                                                                                    |
| OSJNBb0013K01.4    | Kinesin Motor Protein 1-Like                | At5g06670 | Kinesin Motor Protein-Related                                                                                    |
| OSJNBb0013K08.1    | Unknown Protein, 5' Partial                 | At4g36860 | LIM Domain-Containing Protein                                                                                    |
| OSJNBb0013K08.2    | Putative Multidrug Efflux Protein           | At3g26590 | MATE Efflux Family Protein                                                                                       |
| OSJNBb0013K08.3    | Putative Calcineurin B-Like Protein         | At4g26570 | Atcbl3 (Calcineurin B-Like 3)                                                                                    |

|                  |                                                |           |                                                                                                      |
|------------------|------------------------------------------------|-----------|------------------------------------------------------------------------------------------------------|
| OSJNBb0013K08.9  | Putative Nucleotide-Binding Protein            | At4g19540 | Unknown Protein                                                                                      |
| OSJNBb0014I10.10 | Putative Apyrase                               | At5g18280 | Atapy2 (Apyrase 2)                                                                                   |
| OSJNBb0014I11.10 | Putative Oxysterol-Binding Protein             | At4g08180 | Oxysterol-Binding Family Protein                                                                     |
| OSJNBb0014I11.12 | Putative Flavin-Containing Monooxygenase       | At1g12140 | Flavin-Containing Monooxygenase Family Protein / FMO Family Protein                                  |
| OSJNBb0014I11.9  | Putative Nitrate Transporter                   | At1g12110 | NRT1.1 (Nitrate Transporter 1.1); Transporter                                                        |
| OSJNBb0014K18.13 | Unknown Protein                                | At2g40900 | Nodulin Mtn21 Family Protein                                                                         |
| OSJNBb0014K18.8  | Putative 1-Deoxy-D-Xylulose-5-Phosphate        | At4g15560 | Cla1 (Cloroplastos Alterados 1)                                                                      |
| OSJNBb0015G09.5  | Unknown Protein                                | At1g11410 | S-Locus Protein Kinase, Putative                                                                     |
| OSJNBb0015I02.11 | Putative TCP-1/Cpn60 Chaperonin Family Protein | At3g03960 | Chaperonin, Putative                                                                                 |
| OSJNBb0015I02.14 | Putative Helicase                              | At2g42520 | DEAD Box RNA Helicase, Putative                                                                      |
| OSJNBb0015I02.15 | Serine/Threonine Protein Phosphatase PP2A-2    | At2g42500 | PP2A-4 (Protein Phosphatase 2A-4); Protein Phosphatase Type 2A/ Protein Serine/Threonine Phosphatase |
| OSJNBb0015I02.16 | Putative Phosphatase                           | At3g58490 | Phosphatidic Acid Phosphatase Family Protein / PAP2 Family Protein                                   |
| OSJNBb0015I02.17 | Putative Acyl-Activating Enzyme                | At1g55320 | Unknown Protein                                                                                      |
| OSJNBb0015I11.10 | Putative Pollen Allergen                       | At3g45970 | Atexla1 (Arabidopsis Thaliana Expansin-Like A1)                                                      |
| OSJNBb0015I11.13 | Protein Kinase-Like Protein                    | At4g35230 | Protein Kinase Family Protein                                                                        |
| OSJNBb0015I11.17 | Mucin-Like Protein                             | At3g51420 | Strictosidine Synthase Family Protein                                                                |
| OSJNBb0015I11.26 | Putative Protein Phosphatase-2C                | At2g33700 | Protein Phosphatase 2C, Putative / PP2C, Putative                                                    |
| OSJNBb0015K05.11 | Putative Dnaj Domain Containing Protein        | At2g35720 | DNAJ Heat Shock N-Terminal Domain-Containing Protein                                                 |
| OSJNBb0015N08.10 | Unknown Protein                                | At2g19330 | Leucine-Rich Repeat Family Protein                                                                   |
| OSJNBb0015N08.12 | Unknown Protein                                | At5g57110 | ACA8 (AUTOINHIBITED CA2+ -ATPASE, ISOFORM 8); Calmodulin Binding                                     |
| OSJNBb0016D16.5  | Unknown Protein                                | At4g18200 | Unknown Protein                                                                                      |
| OSJNBb0016D16.6  | Unknown Protein                                | At1g19260 | Hat Dimerisation Domain-Containing Protein                                                           |
| OSJNBb0016G07.10 | Unknown Protein                                | At1g28580 | GDSL-Motif Lipase, Putative                                                                          |
| OSJNBb0016G07.8  | 'Unknown Protein, Contains GDSL-Like           | At5g45910 | GDSL-Motif Lipase/Hydrolase Family Protein                                                           |
| OSJNBb0016H12.13 | Putative Endo-1,4-Beta-Glucanase               | At5g49720 | KOR1 (KORRIGAN); Hydrolase, Hydrolyzing O-Glycosyl Compounds                                         |
| OSJNBb0016H12.15 | Putative Cytokinesis-Specific Syntaxin-Related | At1g08560 | SYP111 (Syntaxin 111); T-SNARE                                                                       |
| OSJNBb0016H12.19 | Unknown Protein                                | At5g10860 | CBS Domain-Containing Protein                                                                        |
| OSJNBb0016H12.23 | Unknown Protein                                | At1g28010 | PGP14 (P-GLYCOPROTEIN 14); Atpase, Coupled To Transmembrane Movement Of Substances                   |
| OSJNBb0016H12.26 | Unknown Protein                                | At5g58730 | Pfkb-Type Carbohydrate Kinase Family Protein                                                         |
| OSJNBb0016M10.2  | Putative AUX1-Like Permease                    | At2g21050 | Amino Acid Permease, Putative                                                                        |
| OSJNBb0016P23.14 | Putative GDSL-Like Lipase/Acylhydrolase        | At5g55050 | GDSL-Motif Lipase/Hydrolase Family Protein                                                           |
| OSJNBb0016P23.2  | Unknown Protein                                | At2g32480 | Membrane-Associated Zinc Metalloprotease, Putative                                                   |
| OSJNBb0016P23.5  | Putative Ribosomal Protein L19                 | At3g16780 | 60S Ribosomal Protein L19 (RPL19B)                                                                   |
| OSJNBb0017F17.11 | Hypothetical Protein                           | At1g55000 | Peptidoglycan-Binding Lysm Domain-Containing Protein                                                 |

|                  |                                                 |           |                                                                                                                 |
|------------------|-------------------------------------------------|-----------|-----------------------------------------------------------------------------------------------------------------|
| OSJNBb0017F17.13 | Silencing Group B Protein                       | At1g03150 | GCN5-Related N-Acetyltransferase (GNAT) Family Protein                                                          |
| OSJNBb0017F17.15 | Pescadillo-Like Protein                         | At5g14520 | Pescadillo-Related                                                                                              |
| OSJNBb0017F17.16 | Lethal(2)Denticleless-Like Protein              | At3g27640 | Transducin Family Protein / WD-40 Repeat Family Protein                                                         |
| OSJNBb0017F17.18 | Putative Acyl-Coa Independent Ceramide Synthase | At4g22330 | ATCES1 (ATCES1); Catalytic                                                                                      |
| OSJNBb0017F17.21 | Putative Zinc Binding Protein                   | At2g40110 | Yippee Family Protein                                                                                           |
| OSJNBb0017F17.22 | Putative ABC Transporter                        | At2g40090 | ATATH9 (ABC2 Homolog 9)                                                                                         |
| OSJNBb0017F17.24 | Hypothetical Protein, 5'-Partial                | At5g14940 | Proton-Dependent Oligopeptide Transport (POT) Family Protein                                                    |
| OSJNBb0017I01.22 | Unknown Protein                                 | At1g26700 | MLO14 (MILDEW RESISTANCE LOCUS O 14); Calmodulin Binding                                                        |
| OSJNBb0017I01.27 | Unknown Protein                                 | At3g15380 | Choline Transporter-Related                                                                                     |
| OSJNBb0017I01.6  | Unknown Protein                                 | At3g09010 | Protein Kinase Family Protein                                                                                   |
| OSJNBb0017I01.8  | Unknown Protein                                 | At3g15450 | Unknown Protein                                                                                                 |
| OSJNBb0018A10.13 | Unknown Protein                                 | At1g44070 | Transposable Element Gene; CACTA-Like Transposase Family (Tnp2/En/Spm),                                         |
| OSJNBb0018B10.16 | Unknown Protein                                 | At4g10790 | UBX Domain-Containing Protein                                                                                   |
| OSJNBb0018B10.19 | Putative Trehalase                              | At4g24040 | ATTRE1 (TREHALASE 1); Trehalase                                                                                 |
| OSJNBb0018B10.27 | Putative Shaggy Protein Kinase (5' Partial)     | At3g05840 | ATSK12 (Arabidopsis Thaliana SHAGGY-Like Kinase 12); Protein Kinase                                             |
| OSJNBb0018G11.20 | Nucleoporin-Like Protein                        | At1g33410 | Unknown Protein                                                                                                 |
| OSJNBb0018H10.28 | Putative WD Repeat Protein                      | At5g14050 | Transducin Family Protein / WD-40 Repeat Family Protein                                                         |
| OSJNBb0018J12.16 | Unknown Protein                                 | At2g45440 | DHDPS2 (DIHYDRODIPICOLINATE SYNTHASE); Dihydrodipicolinate Synthase                                             |
| OSJNBb0018L13.8  | Putative Peroxisome Assembly Protein 10         | At2g26350 | PEX10 (Peroxin 10); Protein Binding / Zinc Ion Binding                                                          |
| OSJNBb0020J19.1  | Unknown Protein                                 | At1g10940 | ASK1 (ARABIDOPSIS SERINE/THREONINE KINASE 1); Kinase                                                            |
| OSJNBb0020J19.10 | Unknown Protein                                 | At1g77610 | Glucose-6-Phosphate/Phosphate Translocator-Related                                                              |
| OSJNBb0020J19.11 | Unknown Protein                                 | At3g10220 | Tubulin Folding Cofactor B                                                                                      |
| OSJNBb0020J19.4  | Unknown Protein                                 | At5g11570 | Proton-Dependent Oligopeptide Transport (POT) Family Protein                                                    |
| OSJNBb0020O11.14 | Unknown Protein                                 | At3g47430 | Peroxisomal Biogenesis Factor 11 Family Protein / PEX11 Family Protein                                          |
| OSJNBb0020O11.6  | Unknown Protein                                 | At1g12240 | ATBETAFRUCT4/VAC-INV (VACUOLAR INVERTASE); Beta-Fructofuranosidase/ Hydrolase, Hydrolyzing O-Glycosyl Compounds |
| OSJNBb0021A09.5  | Unknown Protein                                 | At4g23630 | Bti1 (Virb2-Interacting Protein 1)                                                                              |
| OSJNBb0021C10.25 | Hypothetical Protein                            | At1g51130 | Unknown Protein                                                                                                 |
| OSJNBb0021O11.12 | Putative Oxalate Oxidase                        | At1g18970 | GLP4 (GERMIN-LIKE PROTEIN 4); Manganese Ion Binding / Metal Ion Binding / Nutrient Reservoir                    |
| OSJNBb0021O11.14 | Putative Oxalate Oxidase                        | At1g18980 | Germin-Like Protein, Putative                                                                                   |
| OSJNBb0021O11.23 | Unknown Protein                                 | At1g59650 | Cw14                                                                                                            |
| OSJNBb0021O11.3  | Putative Valyl Trna Synthetase                  | At1g14610 | TWN2 (TWIN 2); ATP Binding / Aminoacyl-Trna Ligase                                                              |
| OSJNBb0021O11.5  | Putative Ribosomal Protein L18                  | At5g27820 | Ribosomal Protein L18 Family Protein                                                                            |
| OSJNBb0021O11.8  | Putative Permease                               | At1g49960 | Xanthine/Uracil Permease Family Protein                                                                         |
| OSJNBb0021P10.3  | 20S Proteasome Beta 4 Subunit                   | At4g14800 | PBD2 (20S PROTEASOME BETA SUBUNIT 2); Peptidase                                                                 |

|                    |                                            |           |                                                                                                               |
|--------------------|--------------------------------------------|-----------|---------------------------------------------------------------------------------------------------------------|
| OSJNBb0021P10.4    | Putative CLC-D Chloride Channel Protein    | At5g26240 | CLC-D (Chloride Channel D); Anion Channel/ Voltage-Gated Chloride Channel                                     |
| OSJNBb0022E02.1    | Putative FK506-Binding Protein, 5'-Partial | At1g18170 | Immunophilin / FKBP-Type Peptidyl-Prolyl Cis-Trans Isomerase Family Protein                                   |
| OSJNBb0022E02.10   | Unknown Protein                            | At1g18180 | Unknown Protein                                                                                               |
| OSJNBb0022E02.2    | Unknown Protein                            | At1g18470 | Zinc Finger (C3HC4-Type RING Finger) Family Protein                                                           |
| OSJNBb0022F16.7    | Unknown Protein                            | At1g22920 | AJH1 (COP9-Signalosome 5A)                                                                                    |
| OSJNBb0022F23.3    | Unknown Protein                            | At2g04780 | Fla7 (Fla7)                                                                                                   |
| OSJNBb0022F23.4    | Unknown Protein                            | At4g26690 | MRH5/SHV3 (Morphogenesis Of Root Hair 5); Glycerophosphodiester Phosphodiesterase/ Kinase                     |
| OSJNBb0022F23.9    | Unknown Protein                            | At5g06850 | C2 Domain-Containing Protein                                                                                  |
| OSJNBb0022I16.5    | Putative Cytosolic Trna-Ala Synthetase     | At1g50200 | ALATS (ALANYL-TRNA SYNTHETASE); ATP Binding / Alanine-Trna Ligase/ Nucleic Acid Binding                       |
| OSJNBb0022P19.1    | Unknown Protein                            | At2g47800 | ATMRP4 (Arabidopsis Thaliana Multidrug Resistance-Associated Protein 4)                                       |
| OSJNBb0023M11.20   | Putative 1,4-Beta-Xylanase                 | At4g33830 | Glycosyl Hydrolase Family 10 Protein                                                                          |
| OSJNBb0024A20.12   | Hypothetical Protein                       | At2g31670 | Unknown Protein                                                                                               |
| OSJNBb0024A20.19   | Putative 40S Ribosomal Protein             | At2g31610 | 40S Ribosomal Protein S3 (RPS3A)                                                                              |
| OSJNBb0024A20.6    | Unknown Protein                            | At3g22990 | Binding                                                                                                       |
| OSJNBb0024B16.2    | Putative Ran Binding Protein               | At5g19820 | EMB2734 (EMBRYO DEFECTIVE 2734); Lyase                                                                        |
| OSJNBb0024B16.3    | Putative Sugar-Starvation Induced Protein  | At2g32150 | Haloacid Dehalogenase-Like Hydrolase Family Protein                                                           |
| OSJNBb0024B16.4    | Putative Long Chain Fatty Acid Elongation  | At3g06470 | GNS1/SUR4 Membrane Family Protein                                                                             |
| OSJNBb0024B16.5    | Ethylene Responsive Factor, 5'-Partial     | At1g66340 | ETR1 (ETHYLENE RESPONSE 1); Two-Component Response Regulator                                                  |
| OSJNBb0024B16.7    | Putative Lipoxygenase                      | At3g22400 | Lipoxygenase, Putative                                                                                        |
| OSJNBb0024J04.2    | Expressed Protein                          | At3g58520 | Unknown Protein                                                                                               |
| OSJNBb0024J04.20   | Putative Calcium-Dependent Protein Kinase  | At5g04870 | CPK1 (Calcium-Dependent Protein Kinase Isoform AK1); Calcium- And Calmodulin-Dependent Protein Kinase/ Kinase |
| OSJNBb0024J04.21   | Expressed Protein                          | At2g35860 | Beta-Ig-H3 Domain-Containing Protein / Fasciclin Domain-Containing Protein                                    |
| OSJNBb0024J04.3    | Putative N2,N2-Dimethylguanosine Trna      | At5g15810 | N2,N2-Dimethylguanosine Trna Methyltransferase Family Protein                                                 |
| OSJNBb0024J04.5    | Expressed Protein                          | At5g16280 | Binding                                                                                                       |
| OSJNBb0024J04.6    | Putative Syntaxin                          | At3g11820 | SYP121 (Syntaxin 121); T-SNARE                                                                                |
| OSJNBb0024J04.8    | Putative Calmodulin-Binding Protein        | At3g22190 | IQD5 (IQ-Domain 5); Calmodulin Binding                                                                        |
| OSJNBb0024J04.9    | Putative Dnaj Like Protein                 | At3g44110 | ATJ3 (Arabidopsis Thaliana Dnaj Homologue 3)                                                                  |
| OSJNBb0024J13.13-2 | Unknown Protein                            | At1g80540 | Unknown Protein                                                                                               |
| OSJNBb0024K03.1    | Sterol Desaturase-Like                     | At1g69640 | Acid Phosphatase, Putative                                                                                    |
| OSJNBb0024K03.30   | Putative ABA-Responsive Protein            | At1g74520 | ATHVA22A (Arabidopsis Thaliana HVA22 Homologue A)                                                             |
| OSJNBb0024K03.4    | Putative Cullin 3                          | At1g26830 | ATCUL3/ATCUL3A/CUL3/CUL3A (Cullin 3A); Protein Binding / Ubiquitin-Protein Ligase                             |
| OSJNBb0026I12.4    | Unknown Protein                            | At1g73370 | SUS6; UDP-Glycosyltransferase/ Sucrose Synthase                                                               |
| OSJNBb0026L04.10   | Unknown Protein                            | At1g62860 | Hypothetical Protein                                                                                          |

|                   |                                               |           |                                                                                                                            |
|-------------------|-----------------------------------------------|-----------|----------------------------------------------------------------------------------------------------------------------------|
| OSJNBb0027B08.33  | Putative Hydrolase                            | At4g02340 | Epoxide Hydrolase, Putative                                                                                                |
| OSJNBb0027B08.34  | Putative Isomerase                            | At4g15940 | Fumarylacetoacetate Hydrolase Family Protein                                                                               |
| OSJNBb0027B08.7   | Putative 5'-Phosphoribosyl-5-Aminoimidazole   | At3g55010 | Phosphoribosylformylglycinamide Cyclo-Ligase, Chloroplast / Phosphoribosyl-Aminoimidazole Synthetase / AIR Synthase (PUR5) |
| OSJNBb0027B08.8   | Hypothetical Protein                          | At3g62640 | Unknown Protein                                                                                                            |
| OSJNBb0028C01.25  | Putative Anthocyanidin Hydroxylase            | At1g35190 | Oxidoreductase, 2OG-Fe(II) Oxygenase Family Protein                                                                        |
| OSJNBb0028C01.26  | Unknown Protein                               | At3g61060 | Atp2-A13                                                                                                                   |
| OSJNBb0028C01.28  | Putative Shaggy-Like Kinase                   | At4g00720 | Shaggy-Related Protein Kinase Theta / ASK-Theta (ASK8)                                                                     |
| OSJNBb0028C01.32  | Putative Arm Repeat Containing Protein        | At2g45720 | Binding                                                                                                                    |
| OSJNBb0028C01.45  | Hypothetical Protein                          | At1g74300 | Esterase/Lipase/Thioesterase Family Protein                                                                                |
| OSJNBb0031B09.19  | Putative Multidrug Resistance P-Glycoprotein  | At3g28345 | ABC Transporter Family Protein                                                                                             |
| OSJNBb0031B09.22  | Putative Lycopene Beta-Cyclase                | At3g10230 | Lyc (Lycopene Cyclase)                                                                                                     |
| OSJNBb0031B09.25  | Putative Cgi67 Serine Protease                | At3g01690 | Unknown Protein                                                                                                            |
| OSJNBb0031F05.13  | Putative Transposase                          | At1g35590 | Transposable Element Gene                                                                                                  |
| OSJNBb0031F05.17  | Putative Mechanosensitive Ion Channel Protein | At1g58200 | Msl3 (Mscs-Like 3)                                                                                                         |
| OSJNBb0032D24.14  | Unknown Protein                               | At3g15310 | Transposable Element Gene                                                                                                  |
| OSJNBb0032E06.11  | Unknown Protein                               | At1g63120 | ATRBL2 (ARABIDOPSIS THALIANA RHOMBOID-LIKE 2); Serine-Type Endopeptidase                                                   |
| OSJNBb0032E06.5   | Unknown Protein                               | At1g63170 | Zinc Finger (C3HC4-Type RING Finger) Family Protein                                                                        |
| OSJNBb0032E06.6   | Unknown Protein                               | At1g63160 | Replication Factor C 40 Kda, Putative                                                                                      |
| OSJNBb0032E06.7   | Unknown Protein                               | At5g17320 | Homeobox-Leucine Zipper Family Protein / Lipid-Binding START Domain-Containing Protein                                     |
| OSJNBb0032E15.114 | Putative Myrosinase Precursor                 | At1g80910 | Unknown Protein                                                                                                            |
| OSJNBb0032K15.14  | Putative Ketol-Acid Reductoisomerase          | At3g58610 | Ketol-Acid Reductoisomerase                                                                                                |
| OSJNBb0032K15.17  | Hypothetical Protein                          | At5g15900 | Unknown Protein                                                                                                            |
| OSJNBb0032K15.9   | Unknown Protein                               | At1g29050 | Unknown Protein                                                                                                            |
| OSJNBb0033J23.1   | Unknown Protein,3'-Partial                    | At5g27540 | EMB2473 (EMBRYO DEFECTIVE 2473); GTP Binding / Calcium Ion Binding                                                         |
| OSJNBb0033J23.12  | Putative Cyclophilin                          | At2g38730 | Peptidyl-Prolyl Cis-Trans Isomerase, Putative / Cyclophilin, Putative / Rotamase, Putative                                 |
| OSJNBb0033J23.13  | Putative RNA Binding Protein                  | At5g12190 | RNA Recognition Motif (RRM)-Containing Protein                                                                             |
| OSJNBb0033J23.17  | Putative DNA Gyrase Subunit                   | At3g10690 | DNA Gyrase Subunit A Family Protein                                                                                        |
| OSJNBb0033J23.3   | Putative Short Chain Alcohol Dehydrogenase    | At1g52340 | ABA2 (ABA DEFICIENT 2); Oxidoreductase                                                                                     |
| OSJNBb0033J23.4   | Putative Phospholipase                        | At5g04040 | SDP1 (SUGAR-DEPENDENT1); Triacylglycerol Lipase                                                                            |
| OSJNBb0033N16.11  | Putative Alpha-Coat Protein                   | At2g21390 | Coatomer Protein Complex, Subunit Alpha, Putative                                                                          |
| OSJNBb0033N16.16  | Putative DNA-Binding Protein                  | At1g70660 | MMZ2 (MMS ZWEI HOMOLOGE 2); Ubiquitin-Protein Ligase                                                                       |
| OSJNBb0033N16.3   | Putative Protein Kinase                       | At3g17850 | Protein Kinase, Putative                                                                                                   |
| OSJNBb0033N16.4   | Putative Receptor Kinase                      | At3g17840 | RLK902 (Receptor-Like Kinase 902); ATP Binding / Kinase/ Protein Serine/Threonine Kinase                                   |
| OSJNBb0033N16.5   | Phosphoglucomutase                            | At1g70730 | Phosphoglucomutase, Cytoplasmic, Putative / Glucose Phosphomutase, Putative                                                |

|                    |                                                 |           |                                                                                                                                                                                       |
|--------------------|-------------------------------------------------|-----------|---------------------------------------------------------------------------------------------------------------------------------------------------------------------------------------|
| OSJNBb0034G17.19   | Unknown Protein                                 | At2g01480 | Unknown Protein                                                                                                                                                                       |
| OSJNBb0034G17.8    | Unknown Protein                                 | At3g57560 | Aspartate/Glutamate/Uridylate Kinase Family Protein                                                                                                                                   |
| OSJNBb0034G17.9    | Unknown Protein                                 | At2g44990 | CCD7 (More Axillary Growth 3)                                                                                                                                                         |
| OSJNBb0034I13.1    | Unknown Protein                                 | At2g20810 | GAUT10/LGT4 (Galacturonosyltransferase 10); Polygalacturonate 4-Alpha-Galacturonosyltransferase/ Transferase, Transferring Glycosyl Groups / Transferase, Transferring Hexosyl Groups |
| OSJNBb0034I13.12   | Unknown Protein                                 | At1g01320 | Tetratricopeptide Repeat (TPR)-Containing Protein                                                                                                                                     |
| OSJNBb0034I13.13   | Unknown Protein                                 | At5g10030 | TGA4 (TGACG MOTIF-BINDING FACTOR 4); DNA Binding / Calmodulin Binding / Transcription Factor                                                                                          |
| OSJNBb0034I13.21   | Unknown Protein                                 | At5g39090 | Transferase Family Protein                                                                                                                                                            |
| OSJNBb0034I13.5    | Unknown Protein                                 | At5g03250 | Phototropic-Responsive NPH3 Family Protein                                                                                                                                            |
| OSJNBb0035I14.16   | Uroporphyrin-III C-Methyltransferase-Like       | At5g40850 | UPM1 (UROPHORPHYRIN METHYLASE 1); Uroporphyrin-III C-Methyltransferase                                                                                                                |
| OSJNBb0035N08.27   | Putative Sds22+                                 | At5g19680 | Leucine-Rich Repeat Family Protein                                                                                                                                                    |
| OSJNBb0035N08.29   | Unknown Protein                                 | At3g58800 | Unknown Protein                                                                                                                                                                       |
| OSJNBb0035N08.30   | Putative Protodermal Factor                     | At2g42840 | Pdf1 (Protodermal Factor 1)                                                                                                                                                           |
| OSJNBb0035N21.11   | Unknown Protein, Contains Hat Family            | At3g42170 | Transposase                                                                                                                                                                           |
| OSJNBb0035N21.12   | Unknown Protein, Contains Hat Family            | At3g14800 | Unknown Protein                                                                                                                                                                       |
| OSJNBb0035N21.18   | Putative Polyprenyl Diphosphate Synthase,       | At1g78510 | Solaneyl Diphosphate Synthase (SPS)                                                                                                                                                   |
| OSJNBb0035N21.6    | Putative Late Embryogenesis Abundant Protein    | At2g46140 | Late Embryogenesis Abundant Protein, Putative / LEA Protein, Putative                                                                                                                 |
| OSJNBb0036F07.1    | Hypothetical Protein                            | At3g04750 | Pentatricopeptide (PPR) Repeat-Containing Protein                                                                                                                                     |
| OSJNBb0036F07.12   | Putative Beige Protein                          | At1g03060 | WD-40 Repeat Family Protein / Beige-Related                                                                                                                                           |
| OSJNBb0036F07.14   | Unknown Protein                                 | At1g62250 | Unknown Protein                                                                                                                                                                       |
| OSJNBb0036F07.15   | Putative Cop-Coated Vesicle Membrane Protein    | At3g22845 | Emp24/Gp25I/P24 Protein-Related                                                                                                                                                       |
| OSJNBb0036F07.3    | Putative Histone H2 Protein                     | At3g54560 | Histone H2A.F/Z                                                                                                                                                                       |
| OSJNBb0036F07.7    | Putative ATP Sulfurylase                        | At3g22890 | APS1 (ATP Sulfurylase 3)                                                                                                                                                              |
| OSJNBb0036G09.12   | Putative NADPH-Dependent FMN And FAD Containing | At3g02280 | Flavodoxin Family Protein                                                                                                                                                             |
| OSJNBb0036G09.15   | Hypothetical Protein                            | At1g16740 | Ribosomal Protein L20 Family Protein                                                                                                                                                  |
| OSJNBb0036G09.18   | Cytochrome B245 Beta Chain Homolog Rboha        | At1g64060 | ATRBOH F (RESPIRATORY BURST OXIDASE PROTEIN F); NAD(P)H Oxidase                                                                                                                       |
| OSJNBb0036G09.3    | Putative GTP-Binding Protein                    | At5g11480 | GTP Binding                                                                                                                                                                           |
| OSJNBb0036G09.6    | Putative Dimethylaniline Monooxygenase          | At4g13260 | YUC2 (YUCCA2); Monooxygenase/ Oxidoreductase                                                                                                                                          |
| OSJNBb0037J12.26   | Putative Cytosolic Chaperonin Delta-Subunit     | At3g18190 | Chaperonin, Putative                                                                                                                                                                  |
| OSJNBb0038A07.4    | Putative Glutathione S-Transferase              | At1g59700 | ATGSTU16 (Arabidopsis Thaliana Glutathione S-Transferase (Class Tau) 16); Glutathione Transferase                                                                                     |
| OSJNBb0038A07.5    | Putative Glutathione S-Transferase              | At1g59670 | ATGSTU15 (Arabidopsis Thaliana Glutathione S-Transferase (Class Tau) 15); Glutathione Transferase                                                                                     |
| OSJNBb0038F03.4    | Unknown Protein                                 | At2g19170 | SLP3 (Subtilisin-Like Serine Protease 3); Subtilase                                                                                                                                   |
| OSJNBb0038F20.15-1 | Chloride Channel                                | At5g49890 | CLC-C (Chloride Channel C); Anion Channel/ Voltage-Gated Chloride Channel                                                                                                             |

|                   |                                                     |           |                                                                                                             |
|-------------------|-----------------------------------------------------|-----------|-------------------------------------------------------------------------------------------------------------|
| OSJNBb0038F20.4   | Putative NTGP4                                      | At1g33970 | GTP Binding                                                                                                 |
| OSJNBb0038H12.1   | Putative Ubiquitin-Conjugating Enzyme               | At2g18600 | RUB1-Conjugating Enzyme, Putative                                                                           |
| OSJNBb0038H12.19  | Putative Plastidic Phosphoglucomutase               | At5g51820 | Pgm (Phosphoglucomutase)                                                                                    |
| OSJNBb0039L24.1   | Unknown Protein                                     | At3g61220 | Short-Chain Dehydrogenase/Reductase (SDR) Family Protein                                                    |
| OSJNBb0039L24.15  | Unknown Protein                                     | At4g25570 | ACYB-2 (Arabidopsis Cytochrome B561 -2); Carbon-Monoxide Oxygenase                                          |
| OSJNBb0039L24.21  | Unknown Protein                                     | At1g63420 | Unknown Protein                                                                                             |
| OSJNBb0039L24.7   | Unknown Protein                                     | At3g61230 | LIM Domain-Containing Protein                                                                               |
| OSJNBb0040D15.1   | Unknown Protein                                     | At3g58670 | Unknown Protein                                                                                             |
| OSJNBb0040H10.1   | Alpha/Beta Hydrolase-Like Protein                   | At3g29770 | Hydrolase, Alpha/Beta Fold Family Protein                                                                   |
| OSJNBb0040H10.15  | Translocase Inner Membrane-Like Protein             | At1g20350 | ATTIM17-1 (Arabidopsis Thaliana Translocase Inner Membrane Subunit 17-1); Protein Translocase               |
| OSJNBb0040H10.21  | Putative Reversibly Glycosylated Polypeptide        | At3g02230 | Rgp1 (Reversibly Glycosylated Polypeptide 1)                                                                |
| OSJNBb0040H10.26  | MADS Box Protein, MADS2                             | At1g69120 | AP1 (APETALA1); DNA Binding / Transcription Factor                                                          |
| OSJNBb0040H10.5   | Putative Cytochrome P-450                           | At1g74110 | CYP78A10 (Cytochrome P450, Family 78, Subfamily A, Polypeptide 10); Oxygen Binding                          |
| OSJNBb0040H10.7   | Unknown Protein                                     | At5g61370 | Pentatricopeptide (PPR) Repeat-Containing Protein                                                           |
| OSJNBb0040H10.9   | Putative 6-Phosphogluconolactonase                  | At1g13700 | Glucosamine/Galactosamine-6-Phosphate Isomerase Family Protein                                              |
| OSJNBb0041A22.12  | Putative Inorganic Pyrophosphatase                  | At3g53620 | Inorganic Pyrophosphatase, Putative (Soluble) / Pyrophosphate Phospho-Hydrolase, Putative / Ppase, Putative |
| OSJNBb0041A22.22  | Unknown Protein                                     | At4g22000 | Unknown Protein                                                                                             |
| OSJNBb0041A22.4   | Unknown Protein                                     | At2g35030 | Pentatricopeptide (PPR) Repeat-Containing Protein                                                           |
| OSJNBb0041A22.5   | 'Unknown Protein, Contains ACT Domain, PF01842'     | At2g39570 | ACT Domain-Containing Protein                                                                               |
| OSJNBb0041A22.7   | Putative Na <sup>+</sup> /H <sup>+</sup> Antiporter | At3g53720 | ATCHX20 (CATION/H <sup>+</sup> EXCHANGER 20); Monovalent Cation:Proton Antiporter                           |
| OSJNBb0041A22.8   | Putative Actin-Depolymerizing Factor 1 (Adf 1)      | At5g59890 | ADF4 (ACTIN DEPOLYMERIZING FACTOR 4); Actin Binding                                                         |
| OSJNBb0041B22.109 | Putative S-Receptor Kinase KIK1 Precursor           | At4g21390 | B120; Protein Kinase/ Sugar Binding                                                                         |
| OSJNBb0041J06.115 | Putative ATP Synthase Gamma Chain 1, Chloroplast    | At4g04640 | ATPC1 (ATP Synthase Gamma Chain 1)                                                                          |
| OSJNBb0041J20.7   | Putative RNA Polymerase III                         | At5g45140 | NRPC2 (Nuclear RNA Polymerase C 2); DNA Binding / DNA-Directed RNA Polymerase                               |
| OSJNBb0042J17.1   | Unknown Protein                                     | At2g18840 | Integral Membrane Yip1 Family Protein                                                                       |
| OSJNBb0042J17.15  | Putative Pentatricopeptide Repeat-Containing        | At2g20540 | Pentatricopeptide (PPR) Repeat-Containing Protein                                                           |
| OSJNBb0042J17.6   | Putative Tubby Protein                              | At1g76900 | Attlp1 (TUBBY LIKE PROTEIN 1); Phosphoric Diester Hydrolase/ Transcription Factor                           |
| OSJNBb0042K11.1   | Methylenetetrahydrofolate Reductase, 3-Partial      | At3g59970 | MTHFR1 (METHYLENETETRAHYDROFOLATE REDUCTASE 1); Methylenetetrahydrofolate Reductase (NADPH)                 |
| OSJNBb0042K11.2   | Ribosomal Protein L17-Like Protein                  | At3g54210 | Ribosomal Protein L17 Family Protein                                                                        |
| OSJNBb0042N11.19  | Putative Cytochrome P450                            | At3g26320 | CYP71B36 (Cytochrome P450, Family 71, Subfamily B, Polypeptide 36); Oxygen Binding                          |
| OSJNBb0043C10.11  | Putative 40S Ribosomal Protein S17                  | At3g10610 | 40S Ribosomal Protein S17 (RPS17C)                                                                          |
| OSJNBb0043C10.12  | Putative Homeodomain-Leucine Zipper Protein         | At5g60690 | REV (REVOLUTA); DNA Binding / Lipid Binding / Transcription Factor                                          |
| OSJNBb0043C10.13  | Putative Lysine Decarboxylase-Like Protein          | At3g53450 | Unknown Protein                                                                                             |

|                  |                                               |           |                                                                                                       |
|------------------|-----------------------------------------------|-----------|-------------------------------------------------------------------------------------------------------|
| OSJNBb0043H09.9  | Unknown Protein                               | At5g42150 | Electron Carrier/ Protein Disulfide Oxidoreductase                                                    |
| OSJNBb0043H23.1  | Unknown Protein                               | At1g16560 | Per1-Like Family Protein                                                                              |
| OSJNBb0043H23.11 | Putative ATP-Dependent Transmembrane          | At1g51500 | CER5 (ECERIFERUM 5); Atpase, Coupled To Transmembrane Movement Of Substances                          |
| OSJNBb0043H23.7  | Unknown Protein                               | At5g11500 | Unknown Protein                                                                                       |
| OSJNBb0043P23.23 | Putative RNA Polymerase                       | At3g59600 | DNA-Directed RNA Polymerase I, II, And III, Putative                                                  |
| OSJNBb0043P23.8  | Putative Protein Kinase                       | At4g13020 | MHK; Kinase                                                                                           |
| OSJNBb0044B19.2  | Putative Casein Kinase                        | At3g23340 | CKL10 (Casein Kinase I-Like 10); Casein Kinase I/ Kinase                                              |
| OSJNBb0044B19.4  | Putative Polyubiquitin                        | At5g20620 | UBQ4 (Ubiquitin 4); Protein Binding                                                                   |
| OSJNBb0044B19.7  | Hypothetical Protein                          | At1g03950 | SNF7 Family Protein                                                                                   |
| OSJNBb0044I14.4  | Putative Serine /Threonine Kinase Similar To  | At2g02800 | APK2B (PROTEIN KINASE 2B); Kinase                                                                     |
| OSJNBb0044I14.9  | Putative Sucrose Transporter                  | At1g22710 | SUC2 (SUCROSE-PROTON SYMPORTER 2); Carbohydrate Transporter/ Sucrose:Hydrogen Symporter/ Sugar Porter |
| OSJNBb0046O12.20 | Glycerophosphoryl Diester Phosphodiesterase 2 | At1g66980 | Protein Kinase Family Protein / Glycerophosphoryl Diester Phosphodiesterase Family Protein            |
| OSJNBb0048A17.1  | Casein Kinase II Alpha Subunit, 5'-Partial    | At5g67380 | CKA1 (CASEIN KINASE ALPHA 1); Kinase                                                                  |
| OSJNBb0048A17.10 | Unknown Protein                               | At1g77360 | Pentatricopeptide (PPR) Repeat-Containing Protein                                                     |
| OSJNBb0048A17.11 | Putative Serine Protease                      | At5g67360 | ARA12; Subtilase                                                                                      |
| OSJNBb0048A17.17 | Putative Cytochrome P450                      | At4g37360 | CYP81D2 (Cytochrome P450, Family 81, Subfamily D, Polypeptide 2); Oxygen Binding                      |
| OSJNBb0048A17.2  | Translation Initiation Factor 5A              | At1g69410 | Eukaryotic Translation Initiation Factor 5A, Putative / Eif-5A, Putative                              |
| OSJNBb0048A17.4  | Putative Cytochrome P450                      | At4g37320 | CYP81D5 (Cytochrome P450, Family 81, Subfamily D, Polypeptide 5); Oxygen Binding                      |
| OSJNBb0048A17.5  | Unknown Protein                               | At4g34270 | TIP41-Like Family Protein                                                                             |
| OSJNBb0048A17.6  | Putative Dehydrogenase Precursor              | At1g14810 | Semialdehyde Dehydrogenase Family Protein                                                             |
| OSJNBb0048A17.8  | Putative Protein Phosphatase                  | At4g33920 | Protein Phosphatase 2C Family Protein / PP2C Family Protein                                           |
| OSJNBb0048A17.9  | Putative Methyltransferase                    | At5g65860 | Protein Binding                                                                                       |
| OSJNBb0048D20.14 | Alpha-Expansin                                | At2g03090 | Atexpa15 (Arabidopsis Thaliana Expansin A15)                                                          |
| OSJNBb0048D20.7  | Putative Amino Acid Transporter               | At3g13620 | Amino Acid Permease Family Protein                                                                    |
| OSJNBb0048D20.9  | Putative Cystathionine Gamma Synthase         | At3g01120 | Mto1 (Methionine Overaccumulation 1)                                                                  |
| OSJNBb0048E02.1  | Unknown Protein                               | At4g22150 | Pux3 (Lant Ubx Domain-Containing Protein 3)                                                           |
| OSJNBb0048E02.12 | Unknown Protein                               | At1g24020 | Bet V I Allergen Family Protein                                                                       |
| OSJNBb0048E02.13 | Unknown Protein                               | At4g11130 | RDR2 (RNA-DEPENDENT RNA POLYMERASE 2); RNA-Directed RNA Polymerase                                    |
| OSJNBb0048E02.7  | Unknown Protein                               | At5g47000 | Peroxidase, Putative                                                                                  |
| OSJNBb0048I21.10 | Putative Deoxyribonucleoside Kinase           | At1g72040 | Deoxynucleoside Kinase Family                                                                         |
| OSJNBb0048I21.11 | Unknown Protein                               | At1g34320 | Hypothetical Protein                                                                                  |
| OSJNBb0048I21.12 | Putative GTP-Binding Protein                  | At4g02790 | GTP-Binding Family Protein                                                                            |
| OSJNBb0048I21.13 | Unknown Protein                               | At2g21120 | Unknown Protein                                                                                       |
| OSJNBb0048I21.14 | Putative Amidophosphoribosyltransferase       | At2g16570 | ATASE (GLN PHOSPHORIBOSYL PYROPHOSPHATE AMIDOTRANSFERASE 1); Amidophosphoribosyltransferase           |



|                   |                                                 |           |                                                                                                                                                                                                             |
|-------------------|-------------------------------------------------|-----------|-------------------------------------------------------------------------------------------------------------------------------------------------------------------------------------------------------------|
| OSJNBb0048I21.15  | Putative Oligopeptide Transporter               | At2g02020 | Proton-Dependent Oligopeptide Transport (POT) Family Protein                                                                                                                                                |
| OSJNBb0048I21.6   | Putative Dienelactone Hydrolase                 | At1g35420 | Dienelactone Hydrolase Family Protein                                                                                                                                                                       |
| OSJNBb0048I21.7   | Putative Anthranilate Phosphoribosyltransferase | At1g22610 | C2 Domain-Containing Protein                                                                                                                                                                                |
| OSJNBb0048O22.2   | Unknown Protein                                 | At1g27530 | Unknown Protein                                                                                                                                                                                             |
| OSJNBb0048O22.3   | Putative Phosphoenolpyruvate Carboxykinase      | At4g37870 | ATP Binding / Phosphoenolpyruvate Carboxykinase (ATP)                                                                                                                                                       |
| OSJNBb0048O22.8   | Putatputative ABC Transporter                   | At2g29940 | ATPDR3/PDR3 (PLEIOTROPIC DRUG RESISTANCE 3); Atpase, Coupled To Transmembrane Movement Of Substances                                                                                                        |
| OSJNBb0049A16.3   | Putative Myosin                                 | At3g19960 | ATATM (Myosin 1); Motor                                                                                                                                                                                     |
| OSJNBb0049A16.4   | Putative C-Myc Binding Protein                  | At5g23290 | C-Myc Binding Protein, Putative / Prefoldin, Putative                                                                                                                                                       |
| OSJNBb0050N02.3   | Unknown Protein                                 | At3g49070 | Unknown Protein                                                                                                                                                                                             |
| OSJNBb0050O03.10  | Unknown Protein                                 | At3g17360 | POK1 (PHRAGMOPLAST ORIENTING KINESIN 1); Microtubule Motor                                                                                                                                                  |
| OSJNBb0050O03.11  | Unknown Protein                                 | At5g19610 | Sec7 Domain-Containing Protein                                                                                                                                                                              |
| OSJNBb0050O03.15  | Unknown Protein                                 | At4g38890 | Dihydrouridine Synthase Family Protein                                                                                                                                                                      |
| OSJNBb0050O03.5   | Unknown Protein                                 | At1g24470 | Short-Chain Dehydrogenase/Reductase (SDR) Family Protein                                                                                                                                                    |
| OSJNBb0051N19.2   | Unknown Protein                                 | At2g23000 | SCPL10 (Serine Carboxypeptidase-Like 10); Serine Carboxypeptidase                                                                                                                                           |
| OSJNBb0052C09.16  | Putative Integral Membrane Protein              | At5g52450 | MATE Efflux Protein-Related                                                                                                                                                                                 |
| OSJNBb0053G03.10  | Putative Nuclear Matrix Constituent Protein 1   | At1g13220 | Nuclear Matrix Constituent Protein-Related                                                                                                                                                                  |
| OSJNBb0053G03.17  | Putative Regulatory Protein NPR1 (Nonexpresser) | At5g45110 | NPR3 (NPR1-LIKE PROTEIN 3); Protein Binding                                                                                                                                                                 |
| OSJNBb0053G03.3   | Hypothetical Protein                            | At2g24970 | Unknown Protein                                                                                                                                                                                             |
| OSJNBb0054B09.7   | Unknown Protein                                 | At1g20390 | Hypothetical Protein                                                                                                                                                                                        |
| OSJNBb0055I24.101 | Leaf Senescence Related Protein-Like            | At2g14530 | Unknown Protein                                                                                                                                                                                             |
| OSJNBb0055I24.109 | Putative Peroxidase Prx15 Precursor             | At1g30870 | Cationic Peroxidase, Putative                                                                                                                                                                               |
| OSJNBb0055I24.131 | Chitinase III-Like Protein                      | At1g70800 | C2 Domain-Containing Protein                                                                                                                                                                                |
| OSJNBb0056B16.16  | Putative Vps52 / Sac2 Family Protein            | At1g71270 | Pok (Poky Pollen Tube)                                                                                                                                                                                      |
| OSJNBb0056F09.6   | Unknown Protein                                 | At5g12890 | UDP-Glucuronosyl/UDP-Glucosyl Transferase Family Protein                                                                                                                                                    |
| OSJNBb0056I22.32  | Putative GTP-Binding Protein Yptm3              | At4g17170 | AT-RAB2 (Arabidopsis Rab Gtpase Homolog B1c); GTP Binding                                                                                                                                                   |
| OSJNBb0057P11.2   | Putative Chelatase Subunit                      | At5g45930 | CHLI2; Magnesium Chelatase                                                                                                                                                                                  |
| OSJNBb0058B20.18  | Putative Cell Elongation Protein DIMINUTO (Cell | At3g19820 | DWF1 (DIMINUTO 1); Catalytic                                                                                                                                                                                |
| OSJNBb0058B20.19  | Putative Transcription Initiation Factor IIE,   | At4g20330 | Transcription Initiation Factor-Related                                                                                                                                                                     |
| OSJNBb0058B20.9   | Putative Disease Resistance Response Protein    | At1g65870 | Disease Resistance-Responsive Family Protein                                                                                                                                                                |
| OSJNBb0059K02.12  | Unknown Protein                                 | At1g59840 | Unknown Protein                                                                                                                                                                                             |
| OSJNBb0059K02.13  | Unknown Protein                                 | At3g50100 | Exonuclease Family Protein                                                                                                                                                                                  |
| OSJNBb0059K02.15  | Unknown Protein                                 | At4g34200 | EDA9 (Embryo Sac Development Arrest 9); NAD Binding / Amino Acid Binding / Cofactor Binding / Oxidoreductase, Acting On The CH-OH Group Of Donors, NAD Or NADP As Acceptor / Phosphoglycerate Dehydrogenase |
| OSJNBb0059K02.16  | Unknown Protein                                 | At5g13690 | Alpha-N-Acetylglucosaminidase Family / NAGLU Family                                                                                                                                                         |

|                     |                                               |           |                                                                                                                                                                  |
|---------------------|-----------------------------------------------|-----------|------------------------------------------------------------------------------------------------------------------------------------------------------------------|
| OSJNBb0059K02.23    | Unknown Protein                               | At1g23090 | AST91 (SULFATE TRANSPORTER 91); Sulfate Transporter                                                                                                              |
| OSJNBb0059K02.8     | Unknown Protein                               | At1g47128 | Cysteine Proteinase (RD21A) / Thiol Protease                                                                                                                     |
| OSJNBb0059K02.9     | Unknown Protein                               | At1g53920 | GLIP5 (GDSL-Motif Lipase 5); Carboxylic Ester Hydrolase                                                                                                          |
| OSJNBb0060E08.16    | Unknown Protein                               | At1g05230 | Homeobox-Leucine Zipper Family Protein / Lipid-Binding START Domain-Containing Protein                                                                           |
| OSJNBb0060I05.12    | Hypothetical Protein                          | At1g63830 | Proline-Rich Family Protein                                                                                                                                      |
| OSJNBb0060I05.3     | Putative Transcription Factor                 | At4g11880 | AGL14 (AGAMOUS-LIKE 14); DNA Binding / Transcription Factor                                                                                                      |
| OSJNBb0060J21.1     | Putative Ribosomal Protein S18A               | At4g09800 | RPS18C (S18 RIBOSOMAL PROTEIN); Structural Constituent Of Ribosome                                                                                               |
| OSJNBb0060J21.12    | Putative Serine/Threonine Protein Kinase      | At5g18190 | Protein Kinase Family Protein                                                                                                                                    |
| OSJNBb0060J21.16    | Putative Zinc Finger Protein                  | At2g36320 | Zinc Finger (AN1-Like) Family Protein                                                                                                                            |
| OSJNBb0060J21.19    | Putative Beta-1,3 Glucanase                   | At2g19440 | Glycosyl Hydrolase Family 17 Protein                                                                                                                             |
| OSJNBb0060J21.2     | Glutamate Dehydrogenase                       | At5g18170 | GDH1 (GLUTAMATE DEHYDROGENASE 1); Oxidoreductase                                                                                                                 |
| OSJNBb0060J21.20    | Putative Replication Factor                   | At5g27740 | Nucleoside-Triphosphatase/ Nucleotide Binding                                                                                                                    |
| OSJNBb0060J21.21    | Expressed Protein                             | At3g03740 | ATBPM4 (BTB-POZ AND MATH DOMAIN 4); Protein Binding                                                                                                              |
| OSJNBb0060J21.23    | Expressed Protein                             | At5g35220 | EGY1 (ETHYLENE-DEPENDENT GRAVITROPISM-DEFICIENT AND YELLOW-GREEN 1); Sterol Regulatory Element-Binding Protein Site 2 Protease                                   |
| OSJNBb0060J21.31    | Putative Vesicle Trafficking Protein          | At1g11890 | SEC22 (Secretion 22); Transporter                                                                                                                                |
| OSJNBb0060J21.5     | Putative Acetyltransferase                    | At2g32030 | GCN5-Related N-Acetyltransferase (GNAT) Family Protein                                                                                                           |
| OSJNBb0060M15.2     | Unknown Protein                               | At1g19920 | Aps2 (Atp Sulfurylase Precursor)                                                                                                                                 |
| OSJNBb0060O16.24    | Ethylene-Responsive Protein-Like              | At5g14680 | Universal Stress Protein (USP) Family Protein                                                                                                                    |
| OSJNBb0060O16.25-3  | Carbamoyl-Phosphate Synthetase Small          | At3g27740 | Cara (Carbamoyl Phosphate Synthetase A)                                                                                                                          |
| OSJNBb0060O16.26    | Uridine Kinase-Like Protein                   | At1g26190 | Phosphoribulokinase/Uridine Kinase Family Protein                                                                                                                |
| OSJNBb0060O16.28    | Putative Kinesin Light Chain                  | At1g27500 | Kinesin Light Chain-Related                                                                                                                                      |
| OSJNBb0060O16.41    | Putative Histidinol-Phosphate Transaminase    | At5g10330 | Emb2196 (Embryo Defective 2196)                                                                                                                                  |
| OSJNBb0061C13.16    | Unknown Protein                               | At5g20660 | 24 Kda Vacuolar Protein, Putative                                                                                                                                |
| OSJNBb0061C13.5     | Unknown Protein                               | At3g53260 | PAL2 (Phenylalanine Ammonia-Lyase 2); Phenylalanine Ammonia-Lyase                                                                                                |
| OSJNBb0061I18.14    | Conserved Unknown Protein With Similarity To  | At1g72320 | APUM23 (ARABIDOPSIS PUMILIO 23); RNA Binding                                                                                                                     |
| OSJNBb0061I18.20    | Putative Red Chlorophyll Catabolite Reductase | At4g37000 | Acd2 (Accelerated Cell Death 2)                                                                                                                                  |
| OSJNBb0062D12.107   | Unknown Protein                               | At4g21570 | Unknown Protein                                                                                                                                                  |
| OSJNBb0062D12.120   | Hypothetical Protein                          | At5g58040 | ATFIP1[V] (ARABIDOPSIS HOMOLOG OF YEAST FIP1 [V]); RNA Binding                                                                                                   |
| OSJNBb0062D12.125   | Putative Protein Phosphatase Type 2C          | At3g15260 | Protein Phosphatase 2C, Putative / PP2C, Putative                                                                                                                |
| OSJNBb0062D12.129-2 | Putative MAP4 Kinase                          | At3g15220 | Protein Kinase, Putative                                                                                                                                         |
| OSJNBb0062G19.12    | Putative Acyl Carrier Protein                 | At1g54630 | Acp3 (Acyl Carrier Protein 3)                                                                                                                                    |
| OSJNBb0062G19.5     | Expressed Protein                             | At5g42960 | Unknown Protein                                                                                                                                                  |
| OSJNBb0062G19.9     | Putative Carboxylate Oxidase                  | At1g17020 | SRG1 (SENESCENCE-RELATED GENE 1); Oxidoreductase, Acting On Paired Donors, With Incorporation Or Reduction Of Molecular Oxygen, 2-Oxoglutarate As One Donor, And |

|                     |                                            |           |                                                                                                                                                        |
|---------------------|--------------------------------------------|-----------|--------------------------------------------------------------------------------------------------------------------------------------------------------|
| OSJNBb0062H02.1     | Unknown Protein                            | At5g15220 | Incorporation Of One Atom Each Of Oxygen Into Both Donors                                                                                              |
| OSJNBb0062H02.10    | Unknown Protein                            | At4g04510 | Ribosomal Protein L27 Family Protein                                                                                                                   |
| OSJNBb0062H02.2     | Unknown Protein                            | At4g10710 | Protein Kinase Family Protein                                                                                                                          |
| OSJNBb0062H02.3     | Unknown Protein                            | At3g25420 | SPT16 (GLOBAL TRANSCRIPTION FACTOR C); Metalloexopeptidase                                                                                             |
| OSJNBb0062P14.106   | Putative Cytochrome P450 77A3              | At2g42250 | SCPL21 (Serine Carboxypeptidase-Like 21); Serine Carboxypeptidase                                                                                      |
| OSJNBb0062P14.116-1 | Putative ORMDL2                            | At1g01230 | CYP712A1 (Cytochrome P450, Family 712, Subfamily A, Polypeptide 1); Oxygen Binding                                                                     |
| OSJNBb0064I19.17    | Cyt-P450 Monooxygenase                     | At2g45570 | ORMDL Family Protein                                                                                                                                   |
| OSJNBb0064I19.32    | Unknown Protein                            | At5g27990 | CYP76C2 (Cytochrome P450, Family 76, Subfamily C, Polypeptide 2); Oxygen Binding                                                                       |
| OSJNBb0064P21.2     | Calcium-Dependent Protein Kinase           | At2g17290 | Unknown Protein                                                                                                                                        |
| OSJNBb0064P21.3     | Putative Sugar Transporter                 | At4g35300 | CPK6 (CALCIUM-DEPENDENT PROTEIN KINASE 6); Anion Channel/ Calcium- And Calmodulin-Dependent Protein Kinase/ Kinase                                     |
| OSJNBb0065J09.13    | Unknown Protein                            | At5g22790 | TMT2 (TONOPLAST MONOSACCHARIDE TRANSPORTER2); Carbohydrate Transporter/ Sugar Porter                                                                   |
| OSJNBb0065J09.8     | Unknown Protein                            | At3g53150 | Rer1 (Reticulata-Related 1)                                                                                                                            |
| OSJNBb0065L13.7     | Unknown Protein                            | At4g13510 | UGT73D1 (UDP-Glucosyl Transferase 73D1); UDP-Glycosyltransferase                                                                                       |
| OSJNBb0066C12.30    | Putative Apoplastic Invertase              | At1g55120 | AMT1;1 (AMMONIUM TRANSPORT 1); Ammonium Transporter                                                                                                    |
| OSJNBb0067G11.10    | Unknown Protein                            | At1g18070 | ATFRUCT5 (BETA-FRUCTOFURANOSIDASE 5); Hydrolase, Hydrolyzing O-Glycosyl Compounds / Levanase                                                           |
| OSJNBb0067G11.11    | Unknown Protein                            | At5g55940 | Translation Factor, Nucleic Acid Binding                                                                                                               |
| OSJNBb0067G11.13    | Unknown Protein                            | At5g55760 | Emb2731 (Embryo Defective 2731)                                                                                                                        |
| OSJNBb0067G11.14    | Unknown Protein                            | At5g10480 | SRT1 (SIRTUIN 1); DNA Binding                                                                                                                          |
| OSJNBb0067H15.19    | 'Unknown Protein, Contains BURP Domain,    | At5g25610 | Pas2 (Pasticcino 2)                                                                                                                                    |
| OSJNBb0070J16.2     | Unknown Protein                            | At4g21760 | Rd22 (Responsive To Dessication 22)                                                                                                                    |
| OSJNBb0070J16.3     | Unknown Protein                            | At1g61820 | BGLU47 (Beta-Glucosidase 47); Hydrolase, Hydrolyzing O-Glycosyl Compounds                                                                              |
| OSJNBb0070O09.2     | Unknown Protein                            | At3g18140 | BGLU46; Hydrolase, Hydrolyzing O-Glycosyl Compounds                                                                                                    |
| OSJNBb0070O09.3     | Putative Protein Phosphatase 2A Regulatory | At3g09880 | Nucleotide Binding                                                                                                                                     |
| OSJNBb0070O09.5     | Hypothetical Protein                       | At2g28120 | ATB' BETA (Arabidopsis Thaliana Serine/Threonine Protein Phosphatase 2A 55 Kda Regulatory Subunit B Prime Beta); Protein Phosphatase Type 2A Regulator |
| OSJNBb0071D01.2     | Unknown Protein                            | At1g76020 | Nodulin Family Protein                                                                                                                                 |
| OSJNBb0072E24.1     | Putative Anglo-Associated Migratory Cell   | At4g02730 | Unknown Protein                                                                                                                                        |
| OSJNBb0072E24.15    | Putative Ubiquitin Protein Ligase          | At3g53090 | Transducin Family Protein / WD-40 Repeat Family Protein                                                                                                |
| OSJNBb0072E24.2     | Putative Glutamine Synthetase              | At4g30550 | UPL7 (Ubiquitin-Protein Ligase 7); Ubiquitin-Protein Ligase                                                                                            |
| OSJNBb0072E24.7     | Putative Proline-Rich Protein              | At5g03820 | Glutamine Amidotransferase Class-I Domain-Containing Protein                                                                                           |
| OSJNBb0072M01.1     | Unknown Protein                            | At3g09040 | GDSL-Motif Lipase/Hydrolase Family Protein                                                                                                             |
| OSJNBb0072M01.6     | Unknown Protein                            | At5g44100 | Pentatricopeptide (PPR) Repeat-Containing Protein                                                                                                      |
|                     |                                            |           | CKL7 (Casein Kinase I-Like 7); Casein Kinase I/ Kinase                                                                                                 |

|                   |                                                |           |                                                                                         |
|-------------------|------------------------------------------------|-----------|-----------------------------------------------------------------------------------------|
| OSJNBb0072M01.9   | Unknown Protein                                | At2g20450 | 60S Ribosomal Protein L14 (RPL14A)                                                      |
| OSJNBb0073N24.1   | Putative Glutamyl-Trna Reductase               | At1g58290 | HEMA1; Glutamyl-Trna Reductase                                                          |
| OSJNBb0073N24.11  | Putative Hypersensitivity-Related (Hsr)Protein | At5g17540 | Transferase Family Protein                                                              |
| OSJNBb0073N24.22  | Putative Rhizobium-Induced Nodule Development  | At3g48880 | F-Box Family Protein                                                                    |
| OSJNBb0073N24.9   | Putative LIM Domain Protein                    | At1g01780 | LIM Domain-Containing Protein                                                           |
| OSJNBb0074M06.14  | Putative Polyprotein                           | At3g61330 | Transposable Element Gene                                                               |
| OSJNBb0074M06.8   | Putative Trypanothione-Dependent Peroxidase    | At1g60420 | DC1 Domain-Containing Protein                                                           |
| OSJNBb0075E08.37  | Putative DNA-Binding Protein AT-Hook 2         | At4g22810 | DNA-Binding Protein-Related                                                             |
| OSJNBb0075O18.121 | Osh45                                          | At5g25220 | Knat3 (Knotted1-Like Homeobox Gene 3)                                                   |
| OSJNBb0076A22.1   | Unknown Protein                                | At1g80570 | F-Box Family Protein (FBL14)                                                            |
| OSJNBb0076H04.26  | Putative Trna (Guanine-N2-)-Methyltransferase, | At3g02320 | RNA Binding / Trna (Guanine-N2-)-Methyltransferase                                      |
| OSJNBb0076H04.3   | Putative Mannitol Transporter Protein          | At2g18480 | Mannitol Transporter, Putative                                                          |
| OSJNBb0076N15.1   | Putative Lipxygenase                           | At1g72520 | Lipxygenase, Putative                                                                   |
| OSJNBb0076N15.12  | Putative Fiddlehead-Like Protein               | At2g26250 | FDH (FIDDLEHEAD); Acyltransferase                                                       |
| OSJNBb0076N15.5   | Putative Alpha 1 Subunit Of 20S Proteasome     | At2g05840 | PAA2 (20S Proteasome Alpha Subunit A2); Peptidase                                       |
| OSJNBb0076O03.29  | RNA Helicase-Like                              | At1g32490 | EMB2733/ESP3 (EMBRYO DEFECTIVE 2733); ATP-Dependent RNA Helicase                        |
| OSJNBb0078D11.10  | Unknown Protein                                | At4g35620 | CYCB2;2 (CYCLIN B2;2); Cyclin-Dependent Protein Kinase Regulator                        |
| OSJNBb0078D11.5   | Unknown Protein                                | At1g76270 | Unknown Protein                                                                         |
| OSJNBb0079B02.14  | Unknown Protein                                | At5g62500 | ATEB1B (Arabidopsis Thaliana Microtubule End Binding Protein EB1A); Microtubule Binding |
| OSJNBb0079B02.2   | Unknown Protein                                | At2g21940 | ATP Binding / Shikimate Kinase                                                          |
| OSJNBb0079B02.3   | Unknown Protein                                | At5g64570 | XYL4 (Beta-Xylosidase 4); Hydrolase, Hydrolyzing O-Glycosyl Compounds                   |
| OSJNBb0079B02.9   | Unknown Protein                                | At1g14340 | RNA Recognition Motif (RRM)-Containing Protein                                          |
| OSJNBb0079B16.5   | Putative Pentatricopeptide Repeat Protein      | At5g66500 | Pentatricopeptide (PPR) Repeat-Containing Protein                                       |
| OSJNBb0079L11.8   | Putative Isovaleryl-Coa Dehydrogenase          | At3g45300 | Ivd (Isovaleryl-Coa-Dehydrogenase)                                                      |
| OSJNBb0080H08.21  | Unknown Protein                                | At3g07020 | UDP-Glucose: Sterol Glucosyltransferase (UGT80A2)                                       |
| OSJNBb0080H08.3   | Unknown Protein                                | At1g60500 | Dynamain Family Protein                                                                 |
| OSJNBb0081B07.10  | Ras-Related GTP-Binding Protein                | At1g07410 | Atraba2b (Arabidopsis Rab Gtpase Homolog A2b); GTP Binding                              |
| OSJNBb0081B07.12  | Putative Peptide Transport Protein             | At3g53960 | Proton-Dependent Oligopeptide Transport (POT) Family Protein                            |
| OSJNBb0081B07.15  | Putative Sugar Transporter Protein             | At5g59250 | Sugar Transporter Family Protein                                                        |
| OSJNBb0081B07.16  | Putative Receptor-Like Protein Kinase          | At3g53810 | Lectin Protein Kinase, Putative                                                         |
| OSJNBb0081B07.19  | Putative Hsp70 Binding Protein                 | At3g53800 | Armadillo/Beta-Catenin Repeat Family Protein                                            |
| OSJNBb0081B07.22  | Unknown Protein                                | At2g37660 | Catalytic/ Coenzyme Binding                                                             |
| OSJNBb0081B07.24  | Alpha-Expansin                                 | At2g39700 | Atexpa4 (Arabidopsis Thaliana Expansin A4)                                              |
| OSJNBb0081B07.25  | Putative Protein Kinase                        | At2g28930 | APK1B (Arabidopsis Protein Kinase 1B); Kinase                                           |
| OSJNBb0081B07.5   | Unknown Protein                                | At3g13440 | Hypothetical Protein                                                                    |

|                  |                                                 |           |                                                                                                                                                 |
|------------------|-------------------------------------------------|-----------|-------------------------------------------------------------------------------------------------------------------------------------------------|
| OSJNBb0081B07.6  | Putative Chloroplast RNA Processing Protein     | At1g74850 | PTAC2 (PLASTID TRANSCRIPTIONALLY ACTIVE2); Binding                                                                                              |
| OSJNBb0081F12.23 | Unknown Protein                                 | At5g62290 | Nucleotide-Sensitive Chloride Conductance Regulator (Icln) Family Protein                                                                       |
| OSJNBb0081K01.19 | Putative ABC (ATP-Binding Cassette) Transporter | At5g39040 | ATTAP2 (Arabidopsis Thaliana Transporter Associated With Antigen Processing Protein 2); Atpase, Coupled To Transmembrane Movement Of Substances |
| OSJNBb0081K01.23 | Putative Phytochelatin Synthetase, 3'-Partial   | At3g02210 | Phytochelatin Synthetase Family Protein / COBRA Cell Expansion Protein COBL3                                                                    |
| OSJNBb0081K01.9  | Putative Ribosomal Protein L13a                 | At5g48760 | 60S Ribosomal Protein L13A (RPL13aD)                                                                                                            |
| OSJNBb0084L07.12 | Methylmalonate Semi-Aldehyde Dehydrogenase      | At2g14170 | ALDH6B2 (Aldehyde Dehydrogenase 6B2)                                                                                                            |
| OSJNBb0084L07.3  | Putative Nodule-Specific Protein                | At2g39210 | Nodulin Family Protein                                                                                                                          |
| OSJNBb0085C12.13 | Unknown Protein                                 | At3g27260 | GTE8 (GLOBAL TRANSCRIPTION FACTOR GROUP E8); DNA Binding                                                                                        |
| OSJNBb0085C12.17 | Unknown Protein                                 | At2g43020 | ATPAO2 (POLYAMINE OXIDASE 2); Amine Oxidase                                                                                                     |
| OSJNBb0085F13.1  | Unknown Protein                                 | At1g62780 | Unknown Protein                                                                                                                                 |
| OSJNBb0085F13.13 | Unknown Protein                                 | At1g12550 | Oxidoreductase Family Protein                                                                                                                   |
| OSJNBb0085F13.14 | Unknown Protein                                 | At2g16500 | Adc1 (Arginine Decarboxylase 1)                                                                                                                 |
| OSJNBb0085F13.17 | Unknown Protein                                 | At5g52640 | HSP81-1 (HEAT SHOCK PROTEIN 81-1); ATP Binding / Unfolded Protein Binding                                                                       |
| OSJNBb0085F13.5  | Unknown Protein                                 | At4g08900 | Arginase                                                                                                                                        |
| OSJNBb0085I16.13 | Unknown Protein                                 | At1g53400 | Unknown Protein                                                                                                                                 |
| OSJNBb0085I16.26 | ATP-NAD Kinase Protein-Like                     | At1g78590 | ATNADK-3/NADK3 (NAD(H) Kinase 3); NAD+ Kinase/ NADH Kinase                                                                                      |
| OSJNBb0085I16.5  | Flavonoid 7-O-Methyltransferase-Like            | At1g33030 | O-Methyltransferase Family 2 Protein                                                                                                            |
| OSJNBb0086G13.14 | Unknown Protein                                 | At1g77290 | Tetrachloro-P-Hydroquinone Reductive Dehalogenase-Related                                                                                       |
| OSJNBb0086G13.15 | Unknown Protein                                 | At5g63860 | Uvr8 (Uvb-Resistance 8)                                                                                                                         |
| OSJNBb0086G17.10 | Putative SMC5 Protein                           | At5g15920 | Structural Maintenance Of Chromosomes (SMC) Family Protein (MSS2)                                                                               |
| OSJNBb0088C09.12 | Unknown Protein                                 | At1g43580 | Unknown Protein                                                                                                                                 |
| OSJNBb0088N06.1  | Putative Adenosine Monophosphate Binding        | At1g20560 | AMP-Dependent Synthetase And Ligase Family Protein                                                                                              |
| OSJNBb0088N06.11 | Putative Serine/Threonine Protein Kinase        | At2g17700 | Protein Kinase Family Protein                                                                                                                   |
| OSJNBb0088N06.16 | Ubiquitin-Conjugating Enzyme                    | At4g27960 | UBC9 (UBIQUITIN CONJUGATING ENZYME 9); Ubiquitin-Protein Ligase                                                                                 |
| OSJNBb0088N06.17 | Small GTP-Binding Protein RACBP                 | At3g51300 | ARAC11/Atrop1/ROP1/ROP1AT (Rho-Related Protein From Plants 1); GTP Binding / Gtpase/ Protein Binding                                            |
| OSJNBb0088N06.19 | Putative Glutamate-Trna Ligase                  | At5g64050 | ATERS/ERS/OVA3 (OVULE ABORTION 3); Glutamate-Trna Ligase                                                                                        |
| OSJNBb0088N06.2  | Unknown Protein                                 | At5g42320 | Zinc Carboxypeptidase Family Protein                                                                                                            |
| OSJNBb0088N06.23 | Peptidylprolyl Isomerase Cyp2                   | At2g21130 | Peptidyl-Prolyl Cis-Trans Isomerase / Cyclophilin (CYP2) / Rotamase                                                                             |
| OSJNBb0088N06.3  | Putative Syntaxin Of Plants 52                  | At1g16240 | Syp51 (Syntaxin Of Plants 51)                                                                                                                   |
| OSJNBb0088N06.8  | Putative Aminoalcoholphosphotransferase         | At1g13560 | AAPT1 (AMINOALCOHOLPHOSPHOTRANSFERASE 1); Phosphatidyltransferase                                                                               |
| OSJNBb0089A17.11 | Putative Hexose Carrier Protein                 | At5g61520 | Hexose Transporter, Putative                                                                                                                    |
| OSJNBb0089A17.2  | Putative Protein Kinase                         | At5g61550 | Protein Kinase Family Protein                                                                                                                   |
| OSJNBb0089A17.8  | Putative Myb-Related Protein                    | At5g61620 | Myb Family Transcription Factor                                                                                                                 |
| OSJNBb0089A17.9  | Unknown Protein                                 | At4g17430 | Unknown Protein                                                                                                                                 |

|                  |                                                  |           |                                                                                                                          |
|------------------|--------------------------------------------------|-----------|--------------------------------------------------------------------------------------------------------------------------|
| OSJNBb0089B03.4  | Unknown Protein                                  | At1g08550 | Npq1 (Non-Photochemical Quenching 1)                                                                                     |
| OSJNBb0089B03.6  | Unknown Protein                                  | At2g43710 | SSI2 (Fatty Acid Biosynthesis 2); Acyl-[Acyl-Carrier-Protein] Desaturase                                                 |
| OSJNBb0089F16.6  | Unknown Protein                                  | At5g55510 | Protein Translocase                                                                                                      |
| OSJNBb0089K06.20 | Unknown Protein                                  | At3g04580 | Ein4 (Ethylene Insensitive 4)                                                                                            |
| OSJNBb0089K24.8  | Unknown Protein                                  | At1g58190 | Leucine-Rich Repeat Family Protein                                                                                       |
| OSJNBb0091E11.23 | Unknown Protein                                  | At3g07570 | Membrane Protein, Putative                                                                                               |
| OSJNBb0091E11.4  | Unknown Protein                                  | At4g34530 | Basic Helix-Loop-Helix (Bhlh) Family Protein                                                                             |
| OSJNBb0091N21.27 | Putative Stress-Responsive Protein               | At5g62350 | Invertase/Pectin Methylesterase Inhibitor Family Protein / DC 1.2 Homolog (FL5-2I22)                                     |
| OSJNBb0091N21.29 | Putative Methionine Aminopeptidase               | At2g45240 | MAP1A (METHIONINE AMINOPEPTIDASE 1A); Methionyl Aminopeptidase                                                           |
| OSJNBb0091N21.33 | Unknown Protein                                  | At3g49550 | Unknown Protein                                                                                                          |
| OSJNBb0092C08.10 | Putative Tawin2                                  | At1g78300 | GRF2 (GENERAL REGULATORY FACTOR 2); Protein Phosphorylated Amino Acid Binding                                            |
| OSJNBb0092C08.2  | Putative Flavonol Synthase                       | At4g10490 | Oxidoreductase, 2OG-Fe(II) Oxygenase Family Protein                                                                      |
| OSJNBb0092C08.24 | Putative Avr9/Cf-9 Rapidly Elicited Protein      | At5g42340 | Binding / Ubiquitin-Protein Ligase                                                                                       |
| OSJNBb0092C08.31 | Putative Glutamate/Malate Translocator           | At5g64290 | DCT/DIT2.1 (DICARBOXYLATE TRANSPORT); Oxoglutarate:Malate Antiporter                                                     |
| OSJNBb0092C08.34 | Putative Riboflavin Biosynthesis Protein Riba    | At5g64300 | ATGCH (Arabidopsis Thaliana GTP Cyclohydrolase II); 3,4-Dihydroxy-2-Butanone-4-Phosphate Synthase/ GTP Cyclohydrolase II |
| OSJNBb0092C08.9  | Unknown Protein                                  | At1g16430 | Surfeit Locus Protein 5 Family Protein / SURF5 Family Protein                                                            |
| OSJNBb0092E21.11 | Putative Gibberellin 20-Oxidase                  | At5g07200 | YAP169 (Gibberellin 20 Oxidase 3); Gibberellin 20-Oxidase                                                                |
| OSJNBb0092E21.3  | Cytochrome C                                     | At4g10040 | CYTC-2 (CYTOCHROME C-2); Electron Carrier                                                                                |
| OSJNBb0092E21.8  | Putative Tetratricopeptide Repeat                | At5g10200 | Binding                                                                                                                  |
| OSJNBb0092G21.1  | Unknown Protein                                  | At5g05480 | Unknown Protein                                                                                                          |
| OSJNBb0092G21.11 | Unknown Protein                                  | At5g19080 | Zinc Finger (C3HC4-Type RING Finger) Family Protein                                                                      |
| OSJNBb0092G21.15 | Unknown Protein                                  | At3g63120 | CYCP1;1 (Cyclin P1;1); Cyclin-Dependent Protein Kinase                                                                   |
| OSJNBb0092G21.7  | Unknown Protein                                  | At3g06150 | Unknown Protein                                                                                                          |
| OSJNBb0093E13.1  | Unknown Protein                                  | At3g22290 | Unknown Protein                                                                                                          |
| OSJNBb0093E13.11 | Putative Clathrin Assembly Protein               | At4g35410 | Clathrin Adaptor Complex Small Chain Family Protein                                                                      |
| OSJNBb0093E13.2  | Ferredoxin-NADP+ Reductase                       | At1g30510 | ATRFNR2 (ROOT FNR 2); Oxidoreductase                                                                                     |
| OSJNBb0093E13.3  | Putative Cell Differentiation Protein            | At3g20800 | Rcd1-Like Cell Differentiation Protein, Putative                                                                         |
| OSJNBb0093G06.10 | Unknown Protein                                  | At2g16850 | PIP2;8/PIP3B (Plasma Membrane Intrinsic Protein 2;8); Water Channel                                                      |
| OSJNBb0094K03.15 | Unknown Protein                                  | At3g24180 | Catalytic                                                                                                                |
| OSJNBb0094K03.17 | Putative ATP-Dependent RNA Helicase              | At2g35920 | Helicase Domain-Containing Protein                                                                                       |
| OSJNBb0094O03.14 | Putative Kinesin-Like Protein                    | At3g49650 | Kinesin Motor Protein-Related                                                                                            |
| OSJNBb0094O03.16 | Putative Glyoxysomal Malate Dehydrogenase        | At5g09660 | Pmdh2 (Peroxisomal Nad-Malate Dehydrogenase 2)                                                                           |
| OSJNBb0094P23.28 | Putative GTP-Binding Protein                     | At1g30580 | GTP Binding                                                                                                              |
| OSJNBb0094P23.29 | Putative Acyl-[Acyl-Carrier Protein] Desaturase, | At3g02610 | Acyl-[Acyl-Carrier-Protein] Desaturase                                                                                   |

|                   |                                               |           |                                                                                                    |
|-------------------|-----------------------------------------------|-----------|----------------------------------------------------------------------------------------------------|
| OSJNBb0095H08.30  | Putative Tyrosine Decarboxylase               | At2g20340 | Tyrosine Decarboxylase, Putative                                                                   |
| OSJNBb0095H08.9   | Hypothetical Protein                          | At1g04780 | Ankyrin Repeat Family Protein                                                                      |
| OSJNBb0096M04.115 | Unknown Protein                               | At5g48660 | Unknown Protein                                                                                    |
| OSJNBb0096M04.130 | Putative Phytase                              | At3g07130 | ATPAP15/PAP15 (Purple Acid Phosphatase 15); Acid Phosphatase/ Protein Serine/Threonine Phosphatase |
| OSJNBb0096M04.15  | Putative Cytochrome P450                      | At3g26330 | CYP71B37 (Cytochrome P450, Family 71, Subfamily B, Polypeptide 37); Oxygen Binding                 |
| OSJNBb0096M04.25  | Putative Reductase                            | At3g01980 | Short-Chain Dehydrogenase/Reductase (SDR) Family Protein                                           |
| OSJNBb0096M04.40  | Hypothetical Protein                          | At3g18840 | Binding                                                                                            |
| OSJNBb0096M04.45  | Putative Conserved Oligomeric Golgi Complex   | At4g24840 | Unknown Protein                                                                                    |
| OSJNBb0099O15.10  | Putative Cation/Hydrogen Exchanger (CHX6a)    | At2g13620 | ATCHX15 (Cation/Hydrogen Exchanger 15); Monovalent Cation:Proton Antiporter                        |
| OSJNBb0099O15.15  | Putative L-Ascorbate Oxidase                  | At3g13390 | SKS11 (SKU5 Similar 11); Copper Ion Binding / Oxidoreductase                                       |
| OSJNBb0099O15.8   | Unknown Protein                               | At5g20640 | Unknown Protein                                                                                    |
| OSJNBb0099P06.1   | Unknown Protein                               | At3g17470 | Rela/Spot Domain-Containing Protein / Calcium-Binding EF-Hand Family Protein                       |
| OSJNBb0099P06.11  | Putative Glutaryl-Coa Dehydrogenase           | At3g51840 | ACX4 (ACYL-COA OXIDASE 4); Oxidoreductase                                                          |
| OSJNBb0099P06.14  | 'Putative 6-Phosphofructo-2-Kinase (EC        | At1g07110 | F2KP (FRUCTOSE-2,6-BISPHOSPHATASE); Fructose-2,6-Bisphosphate 2-Phosphatase                        |
| OSJNBb0099P06.4   | Putative Receptor-Like Protein Kinase         | At3g46290 | Protein Kinase, Putative                                                                           |
| OSJNBb0099P06.6   | Putative Arginyl-Trna Synthetase              | At4g26300 | EMB1027 (EMBRYO DEFECTIVE 1027); ATP Binding / Arginine-Trna Ligase                                |
| OSJNBb0099P06.8   | Putative PRP8 Protein                         | At1g80070 | Sus2 (Abnormal Suspensor 2)                                                                        |
| OSJNBb0103I08.15  | Unknown Protein                               | At5g24380 | YSL2 (YELLOW STRIPE LIKE 2); Oligopeptide Transporter                                              |
| OSJNBb0103I08.5   | Unknown Protein                               | At5g23450 | Atlcbk1 (A. Thaliana Long-Chain Base (Lcb) Kinase 1); Diacylglycerol Kinase                        |
| OSJNBb0103I08.9   | Unknown Protein                               | At3g45270 | Transposable Element Gene                                                                          |
| OSJNBb0106M04.19  | Cold Acclimation Protein WCOR413-Like Protein | At3g50830 | COR413-PM2 (Cold Regulated 413 Plasma Membrane 2)                                                  |
| OSJNBb0106M04.22  | Putative Thioredoxin-Like Protein             | At4g37200 | HCF164 (High Chlorophyll Fluorescence 164); Thiol-Disulfide Exchange Intermediate                  |
| OSJNBb0106M04.24  | Putative Allene Oxide Synthase                | At5g42650 | AOS (ALLENE OXIDE SYNTHASE); Hydro-Lyase/ Oxygen Binding                                           |
| OSJNBb0108E08.15  | Expressed Protein                             | At1g17460 | TRFL3 (TRF-LIKE 3); DNA Binding / Transcription Factor                                             |
| OSJNBb0108E17.13  | Putative NADH-Ubiquinone Oxidoreductase       | At4g02580 | NADH-Ubiquinone Oxidoreductase 24 Kda Subunit, Putative                                            |
| OSJNBb0108E17.14  | Unknown Protein                               | At3g04820 | Pseudouridylate Synthase                                                                           |
| OSJNBb0108E17.2   | Hypothetical Protein                          | At1g09850 | XBCP3 (XYLEM BARK CYSTEINE PEPTIDASE 3); Cysteine-Type Peptidase                                   |
| OSJNBb0108E17.4   | Putative Thioredoxin H-Type (TRX-H) (Trxta)   | At5g42980 | ATTRX3 (Thioredoxin H-Type 3); Thiol-Disulfide Exchange Intermediate                               |
| OSJNBb0111B07.11  | Putative Vesicle Transport-Related Protein    | At2g17980 | ATSLY1; Protein Transporter                                                                        |
| OSJNBb0111K12.10  | Putative Beta-Glucosidase                     | At4g27820 | Glycosyl Hydrolase Family 1 Protein                                                                |
| OSJNBb0113I20.23  | Putative Xylan Xylanohydrolase Isoenzyme      | At1g58370 | RXF12; Hydrolase, Hydrolyzing O-Glycosyl Compounds                                                 |
| OSJNBb0116K07.13  | Unknown Protein                               | At3g19320 | Leucine-Rich Repeat Family Protein                                                                 |
| OSJNBb0116K07.15  | Unknown Protein                               | At3g50120 | Unknown Protein                                                                                    |
| OSJNBb0116K07.19  | Unknown Protein                               | At5g63930 | Leucine-Rich Repeat Transmembrane Protein Kinase, Putative                                         |

|                  |                                                 |           |                                                                                                                |
|------------------|-------------------------------------------------|-----------|----------------------------------------------------------------------------------------------------------------|
| OSJNBb0116K07.3  | Unknown Protein                                 | At1g80050 | APT2 (ADENINE PHOSPHORIBOSYL TRANSFERASE 2); Adenine Phosphoribosyltransferase                                 |
| OSJNBb0118P14.11 | Unknown Protein                                 | At1g47980 | Unknown Protein                                                                                                |
| OSJNBb0118P14.12 | Unknown Protein                                 | At5g36880 | AMP Binding / Acetate-Coa Ligase/ Catalytic                                                                    |
| OSJNBb0118P14.5  | Unknown Protein                                 | At1g76130 | AMY2/ATAMY2 (ALPHA-AMYLASE-LIKE 2); Alpha-Amylase                                                              |
| OSJNOa018M17.6   | Putative Endo-Beta-1,4-Glucanase Precursor      | At2g32990 | Glycosyl Hydrolase Family 9 Protein                                                                            |
| OSJNOa283G08.2   | Glycolipid Transfer Protein-Like                | At2g33470 | Gltp1 (Glycolipid Transfer Protein 1)                                                                          |
| P0003D09.18      | Unknown Protein                                 | At5g62270 | Unknown Protein                                                                                                |
| P0003D09.22      | Putative 4-Diphosphocytidyl-2-C-Methyl-D-       | At2g26930 | ATCDPMEK (PIGMENT DEFECTIVE 277); 4-(Cytidine 5'-Diphospho)-2-C-Methyl-D-Erythritol Kinase                     |
| P0003E08.13      | Putative Mitogen-Activated Protein Kinase       | At2g42880 | ATMPK20 (Arabidopsis Thaliana MAP Kinase 20); MAP Kinase                                                       |
| P0003E08.5       | Hypothetical Protein                            | At1g29820 | Unknown Protein                                                                                                |
| P0003E08.6       | Hypothetical Protein                            | At2g42960 | Protein Kinase Family Protein                                                                                  |
| P0004D12.18      | Rapamycin-Binding Protein-Like                  | At3g25220 | FKBP15-1 (FK506-Binding Protein 15 Kd-1); FK506 Binding / Peptidyl-Prolyl Cis-Trans Isomerase                  |
| P0004D12.9       | Leaf Senescence Related Protein-Like            | At4g25360 | Unknown Protein                                                                                                |
| P0005A05.10      | Unknown Protein                                 | At1g19600 | Pfkb-Type Carbohydrate Kinase Family Protein                                                                   |
| P0005A05.13      | Putative Isoflavone Reductase Homolog IRL       | At4g39230 | Isoflavone Reductase, Putative                                                                                 |
| P0005A05.14      | Putative Isoflavone Reductase Homolog IRL       | At1g75280 | Isoflavone Reductase, Putative                                                                                 |
| P0005A05.15      | Hypothetical Protein                            | At5g60030 | Unknown Protein                                                                                                |
| P0005E02.105     | Putative Phi-1(Phosphate-Induced Protein 1)     | At2g17230 | Phosphate-Responsive 1 Family Protein                                                                          |
| P0005E02.109     | Putative Pngase (Peptide N-Glycanase)           | At5g49570 | Transglutaminase-Like Family Protein                                                                           |
| P0005E02.119     | Unknown Protein                                 | At4g20150 | Unknown Protein                                                                                                |
| P0005H10.12      | Putative Aldose Reductase                       | At3g53880 | Aldo/Keto Reductase Family Protein                                                                             |
| P0005H10.17      | Putative Delta L Pyrroline-5-Carboxylate        | At2g39800 | P5cs1 (Delta1-Pyrroline-5-Carboxylate Synthase 1)                                                              |
| P0005H10.21      | Ras-Related GTP-Binding Protein                 | At3g46830 | Atraba2c/Atrab11a (Arabidopsis Rab Gtpase Homolog A2c); GTP Binding                                            |
| P0006C01.14      | Beta-Adaptin-Like Protein A                     | At5g11490 | Adaptin Family Protein                                                                                         |
| P0006C01.2       | Sgt1                                            | At4g11260 | SGT1B (Enhanced Downy Mildew 1b); Binding                                                                      |
| P0006C08.21      | Putative Vacuolar Protein Sorting               | At3g47810 | MAG1 (MAIGO 1); Protein Serine/Threonine Phosphatase                                                           |
| P0006C08.29-1    | Putative 24 Kda Seed Maturation Protein         | At4g11220 | Bti2 (Virb2-Interacting Protein 2)                                                                             |
| P0006C08.30      | Putative Phosphoribosylanthranilate Isomerase 1 | At1g07780 | PAI1 (PHOSPHORIBOSYLANTHRANILATE ISOMERASE 1); Phosphoribosylanthranilate Isomerase                            |
| P0006E02.16      | Putative Octicosapeptide/Phox/Bem1p (PB1)       | At1g62390 | Octicosapeptide/Phox/Bem1p (PB1) Domain-Containing Protein / Tetratricopeptide Repeat (TPR)-Containing Protein |
| P0007D08.10-1    | Putative Sac Domain-Containing Inositol         | At1g22620 | ATSAC1 (SUPPRESSOR OF ACTIN 1); Phosphoinositide 5-Phosphatase                                                 |
| P0007D08.11      | Putative Alcohol Dehydrogenase (Zn              | At5g63620 | Oxidoreductase, Zinc-Binding Dehydrogenase Family Protein                                                      |
| P0007D08.12      | Putative Adenylate Kinase, Chloroplast (ATP-AMP | At5g47840 | Adenylate Kinase, Chloroplast, Putative / ATP-AMP Transphosphorylase, Putative                                 |
| P0007D08.23      | Putative PIR7A Protein                          | At1g33990 | Hydrolase, Alpha/Beta Fold Family Protein                                                                      |



|               |                                               |           |                                                                                                                                      |
|---------------|-----------------------------------------------|-----------|--------------------------------------------------------------------------------------------------------------------------------------|
| P0007D08.28   | Putative PPR Protein                          | At3g07290 | Pentatricopeptide (PPR) Repeat-Containing Protein                                                                                    |
| P0007D08.32   | Unknown Protein                               | At5g11730 | Unknown Protein                                                                                                                      |
| P0007D08.34   | Putative Arm Repeat-Containing Protein        | At2g23140 | Armadillo/Beta-Catenin Repeat Family Protein / U-Box Domain-Containing Protein                                                       |
| P0009G03.13   | Hypothetical Protein                          | At3g12570 | Fyd                                                                                                                                  |
| P0010B10.22   | Secretory Carrier Membrane Protein            | At1g61250 | SC3 (SECRETORY CARRIER 3); Carrier                                                                                                   |
| P0010B10.27   | Putative Vacuolar Protein Sorting-Associated  | At4g21560 | Vacuolar Protein Sorting-Associated Protein 28 Family Protein / VPS28 Family Protein                                                 |
| P0010C01.12-1 | WD-40 Repeat Protein-Like                     | At3g15470 | WD-40 Repeat Family Protein                                                                                                          |
| P0010C01.12-2 | WD-40 Repeat Protein-Like                     | At5g54200 | WD-40 Repeat Family Protein                                                                                                          |
| P0010C01.19   | Putative Beta-Expansin                        | At4g28250 | Atexpb3 (Arabidopsis Thaliana Expansin B3)                                                                                           |
| P0010C01.20   | Putative Sphingolipid Delta 4 Desaturase      | At4g04930 | DES-1-LIKE (Fatty Acid Desaturase 1-Like); Oxidoreductase                                                                            |
| P0010C01.26   | Putative Thioredoxin M-Type, Chloroplast      | At1g76760 | ATY1 (Arabidopsis Thioredoxin Y1); Thiol-Disulfide Exchange Intermediate                                                             |
| P0010D04.10   | Putative Protein Translation Factor Sui1      | At1g54290 | Eukaryotic Translation Initiation Factor SUI1, Putative                                                                              |
| P0011G08.16   | Putative Receptor-Like Protein Kinase         | At5g61350 | Protein Kinase Family Protein                                                                                                        |
| P0012A04.17   | Bola-Like Family Protein / Fe-S Metabolism    | At4g26500 | ATSUFE/CPSUFE/EMB1374 (EMBRYO DEFECTIVE 1374); Enzyme Activator/ Transcription Regulator                                             |
| P0012A04.3    | Unknown Protein                               | At3g57620 | Glyoxal Oxidase-Related                                                                                                              |
| P0013B04.13   | Unknown Protein                               | At3g50340 | Unknown Protein                                                                                                                      |
| P0013B04.16   | Putative Glycoprotein                         | At1g49710 | FUT12 (Fucosyltransferase 12); Fucosyltransferase/ Transferase, Transferring Glycosyl Groups                                         |
| P0013B04.19   | Putative Cytochrome P450                      | At3g19270 | CYP707A4 (Cytochrome P450, Family 707, Subfamily A, Polypeptide 4); Oxygen Binding                                                   |
| P0013F10.1    | Hypothetical Protein                          | At2g47160 | Bor1 (Requires High Boron 1)                                                                                                         |
| P0013F10.14   | Hypothetical Protein                          | At1g52780 | Unknown Protein                                                                                                                      |
| P0013F10.7    | Putative Glucosyl Transferase                 | At2g36790 | UGT73C6 (UDP-Glucosyl Transferase 73C6); UDP-Glucosyltransferase/ UDP-Glycosyltransferase/ Transferase, Transferring Glycosyl Groups |
| P0013G02.12   | Putative Ribosomal RNA Apurinic Site Specific | At1g55030 | F-Box Family Protein                                                                                                                 |
| P0014E08.3    | Unknown Protein                               | At5g58740 | Nuclear Movement Family Protein                                                                                                      |
| P0015C07.26-2 | Serine/Threonine Protein Kinase-Like          | At4g35780 | Protein Kinase Family Protein                                                                                                        |
| P0015C07.29   | Putative Chain A, C-Terminal Domain Of Mouse  | At1g25280 | Att1p10 (TUBBY LIKE PROTEIN 10); Phosphoric Diester Hydrolase/ Transcription Factor                                                  |
| P0015C07.31   | MAP3K-Like Protein Kinase                     | At3g19310 | Phospholipase C                                                                                                                      |
| P0015C07.39-1 | Putative Remembr-H2 Protein                   | At1g71980 | Protease-Associated Zinc Finger (C3HC4-Type RING Finger) Family Protein                                                              |
| P0016F11.27   | Putative Cinnamoyl Coa Reductase              | At1g80820 | Ccr2 (Cinnamoyl Coa Reductase)                                                                                                       |
| P0016F11.32   | Putative Translation Initiation Factor Eif-2B | At2g34970 | Eif4-Gamma/Eif5/Eif2-Epsilon Domain-Containing Protein                                                                               |
| P0017C12.1    | Serine/Threonine-Specific Receptor Protein    | At4g32710 | Kinase                                                                                                                               |
| P0017C12.24   | U5 Snrnp-Specific Protein-Like                | At5g04990 | Sad1/Unc-84 Protein-Related                                                                                                          |
| P0017C12.29   | Putative Mevalonate Diphosphate Decarboxylase | At2g38700 | MVD1 (Mevalonate Diphosphate Decarboxylase 1)                                                                                        |
| P0017H11.13   | Dnaj Protein-Like                             | At5g16650 | DNAJ Heat Shock N-Terminal Domain-Containing Protein                                                                                 |
| P0017H11.16   | Unknown Protein                               | At4g17790 | Unknown Protein                                                                                                                      |

|               |                                                 |           |                                                                                       |
|---------------|-------------------------------------------------|-----------|---------------------------------------------------------------------------------------|
| P0017H11.19-1 | MDR-Like ABC Transporter                        | At4g25960 | PGP2 (P-GLYCOPROTEIN 2); Atpase, Coupled To Transmembrane Movement Of Substances      |
| P0017H11.19-2 | Putative MDR-Like ABC Transporter               | At1g10680 | PGP10 (P-GLYCOPROTEIN 10); Atpase, Coupled To Transmembrane Movement Of Substances    |
| P0017H11.7    | Putative Zinc-Binding Protein                   | At4g17900 | Zinc-Binding Family Protein                                                           |
| P0018C07.101  | BLE2 Protein-Like                               | At3g06210 | Binding                                                                               |
| P0018C07.116  | Putative Zinc Finger POZ Domain Protein         | At3g06190 | ATBPM2; Protein Binding                                                               |
| P0018C07.117  | Putative Placental Protein 6                    | At3g07950 | Rhomboid Protein-Related                                                              |
| P0018C07.120  | Pectin Methylesterase-Like Protein              | At5g55590 | QRT1 (QUARTET 1); Pectinesterase                                                      |
| P0018C07.124  | Integral Membrane Protein-Like                  | At1g03260 | Hypothetical Protein                                                                  |
| P0018C10.26   | Unknown Protein                                 | At1g77130 | Glycogenin Glucosyltransferase (Glycogenin)-Related                                   |
| P0018C10.28   | Putative Pectin Methylesterase                  | At5g09760 | Pectinesterase Family Protein                                                         |
| P0018C10.29   | Hypothetical Protein                            | At1g48880 | Unknown Protein                                                                       |
| P0018C10.31   | Putative Stearoyl-Acyl Carrier Protein          | At1g43800 | Acyl-(Acyl-Carrier-Protein) Desaturase, Putative / Stearoyl-ACP Desaturase, Putative  |
| P0018C10.32   | Hypothetical Protein                            | At3g21470 | Pentatricopeptide (PPR) Repeat-Containing Protein                                     |
| P0018C10.38   | Scarecrow-Like Protein                          | At1g21450 | SCL1 (SCARECROW-LIKE 1); Transcription Factor                                         |
| P0018C10.44   | Unknown Protein                                 | At1g21410 | F-Box Family Protein                                                                  |
| P0019D06.2    | Putative AAA-Type Atpase                        | At2g27600 | AAA-Type Atpase Family Protein / Vacuolar Sorting Protein-Related                     |
| P0019E03.1    | Putative Purine Permease                        | At1g30840 | ATPUP4 (Arabidopsis Thaliana Purine Permease 4); Purine Transporter                   |
| P0019E03.16   | NADH-Dependent Glutamate Synthase               | At5g53460 | GLT1 (NADH-Dependent Glutamate Synthase 1 Gene)                                       |
| P0019E03.18   | Putative GPAA1 - Like Protein                   | At5g19130 | GPI Transamidase Component Family Protein / Gaa1-Like Family Protein                  |
| P0019E03.5    | Hypothetical Protein                            | At3g61750 | Auxin-Responsive Protein -Related                                                     |
| P0020B10.26   | Glucose-6-Phosphate/Phosphate Translocator      | At5g54800 | GPT1 (Glucose-6-Phosphate Transporter 1); Antiporter/ Glucose-6-Phosphate Transporter |
| P0020C11.10   | Putative Glutathione S-Transferase              | At2g02390 | ATGSTZ1 (GLUTATHIONE S-TRANSFERASE 18); Glutathione Transferase                       |
| P0020C11.11   | Putative Nucleic Acid Binding Protein           | At5g26210 | PHD Finger Family Protein                                                             |
| P0020C11.16   | Putative Prgr1                                  | At5g23550 | Unknown Protein                                                                       |
| P0020C11.29-1 | Putative Pentatricopeptide (PPR)                | At1g09900 | Pentatricopeptide (PPR) Repeat-Containing Protein                                     |
| P0020C11.30   | Putative Protein Kinase 1                       | At2g41970 | Protein Kinase, Putative                                                              |
| P0020D05.17   | Unknown Protein                                 | At4g08240 | Unknown Protein                                                                       |
| P0020D05.19   | Putative Calmodulin-Binding Protein Phosphatase | At1g47380 | Protein Phosphatase 2C-Related / PP2C-Related                                         |
| P0020D05.7    | Unknown Protein                                 | At4g16830 | Nuclear RNA-Binding Protein (RGGA)                                                    |
| P0020D05.9    | Unknown Protein                                 | At1g50630 | Extracellular Ligand-Gated Ion Channel                                                |
| P0020E09.15   | Hypothetical Protein                            | At1g11290 | Pentatricopeptide (PPR) Repeat-Containing Protein                                     |
| P0020E09.19   | Putative Uncoupling Protein                     | At3g54110 | ATPUMP1/UCP1 (UNCOUPLING PROTEIN 1); Binding / Oxidative Phosphorylation Uncoupler    |
| P0020E09.22   | Putative Cinnamoyl-Coa Reductase                | At2g02400 | Cinnamoyl-Coa Reductase Family                                                        |
| P0021G06.107  | Putative Vesicle-Associated Membrane Protein    | At2g32670 | ATVAMP725 (Arabidopsis Thaliana Vesicle-Associated Membrane Protein 725)              |

|                |                                                 |           |                                                                                                                                                                               |
|----------------|-------------------------------------------------|-----------|-------------------------------------------------------------------------------------------------------------------------------------------------------------------------------|
| P0021G06.114   | Putative IAA Amidohydrolase                     | At3g02875 | ILR1 (IAA-LEUCINE RESISTANT 1); Metallopeptidase                                                                                                                              |
| P0022B05.111   | Putative Pollen-Specific Protein NTP303         | At5g66920 | SKS17 (SKU5 Similar 17); Copper Ion Binding / Oxidoreductase                                                                                                                  |
| P0022B05.116   | Hypothetical Protein                            | At1g09310 | Unknown Protein                                                                                                                                                               |
| P0022E03.24    | Photosystem I Protein-Like Protein              | At1g30380 | Psak (Photosystem I Subunit K)                                                                                                                                                |
| P0022E03.6-1   | Ferredoxin--NADP Reductase, Embryo Isozyme,     | At4g05390 | ATRFNR1 (ROOT FNR 1); Oxidoreductase                                                                                                                                          |
| P0022E03.9     | Putative Flavonol 3-O-Glucosyltransferase       | At5g17050 | UDP-Glucuronosyl/UDP-Glucosyl Transferase Family Protein                                                                                                                      |
| P0022F10.12    | Unknown Protein                                 | At1g79750 | ATNADP-ME4 (NADP-MALIC ENZYME 4); Malate Dehydrogenase (Oxaloacetate-Decarboxylating) (NADP+)/ Malic Enzyme/ Oxidoreductase, Acting On NADH Or NADPH, NAD Or NADP As Acceptor |
| P0022F10.18    | Putative ABC Transporter                        | At1g59870 | PDR8/PEN3 (PLEIOTROPIC DRUG RESISTANCE8); Atpase, Coupled To Transmembrane Movement Of Substances                                                                             |
| P0022F10.23    | Hypothetical Protein                            | At5g11580 | UVB-Resistance Protein-Related / Regulator Of Chromosome Condensation (RCC1) Family Protein                                                                                   |
| P0022F12.20    | Putative Receptor-Like Protein                  | At2g45340 | Leucine-Rich Repeat Transmembrane Protein Kinase, Putative                                                                                                                    |
| P0022F12.21    | Putative Rad51C Protein                         | At2g45280 | ATRAD51C (Arabidopsis Thaliana Ras Associated With Diabetes Protein 51C); ATP Binding / Damaged DNA Binding                                                                   |
| P0024C06.22    | Putative Flavonol 3'-Sulfotransferase           | At3g45070 | Sulfotransferase Family Protein                                                                                                                                               |
| P0024C06.31    | Putative Fatty Acyl Coa Reductase               | At5g22500 | Acyl Coa Reductase, Putative / Male-Sterility Protein, Putative                                                                                                               |
| P0024G09.11    | Unknown Protein                                 | At3g55600 | Unknown Protein                                                                                                                                                               |
| P0024G09.18    | Unknown Protein                                 | At3g49720 | Unknown Protein                                                                                                                                                               |
| P0024G09.4     | Putative Peptide Transport Protein              | At5g01180 | Proton-Dependent Oligopeptide Transport (POT) Family Protein                                                                                                                  |
| P0025A05.3     | Unknown Protein                                 | At5g15240 | Amino Acid Transporter Family Protein                                                                                                                                         |
| P0025A05.6     | Putative Glucosyltransferase IS5a,              | At2g15480 | UGT73B5 (UDP-Glucosyl Transferase 73B5); UDP-Glycosyltransferase/ Transferase, Transferring Glycosyl Groups                                                                   |
| P0025D09.105-1 | Unknown Protein                                 | At2g45990 | Unknown Protein                                                                                                                                                               |
| P0025H06.10    | Ferredoxin-Nitrite Reductase                    | At2g15620 | NIR1 (NITRITE REDUCTASE); Ferredoxin-Nitrate Reductase                                                                                                                        |
| P0026F07.24    | Putative Caffeoyl-Coa O-Methyltransferase 1     | At4g34050 | Caffeoyl-Coa 3-O-Methyltransferase, Putative                                                                                                                                  |
| P0026F07.9     | Putative Transmembrane 9 Superfamily Protein    | At4g12650 | Endomembrane Protein 70, Putative                                                                                                                                             |
| P0026H03.15    | Calcium-Binding EF Hand-Like Protein            | At3g24110 | Calcium-Binding EF Hand Family Protein                                                                                                                                        |
| P0026H03.20-2  | Subtilisin-Like Serine Protease AIR3-Like       | At5g59810 | Subtilase Family Protein                                                                                                                                                      |
| P0026H03.22    | Unknown Protein                                 | At4g12690 | Unknown Protein                                                                                                                                                               |
| P0026H03.23    | Ribosomal Protein L12-Like Protein              | At3g06040 | Ribosomal Protein L12 Family Protein                                                                                                                                          |
| P0026H03.8     | Unknown Protein                                 | At3g27340 | Unknown Protein                                                                                                                                                               |
| P0027A02.29    | Putative Senescence-Associated Protein          | At2g19580 | Tet2 (Tetraspanin2)                                                                                                                                                           |
| P0027A02.9     | Putative Serine Threonine Kinase                | At5g12000 | Kinase                                                                                                                                                                        |
| P0027G10.1     | Putative Avr9/Cf-9 Rapidly Elicited Protein 276 | At1g60190 | Armadillo/Beta-Catenin Repeat Family Protein / U-Box Domain-Containing Protein                                                                                                |
| P0027G10.24    | Putative Beta-Glucan Binding Protein            | At5g15870 | Glycosyl Hydrolase Family 81 Protein                                                                                                                                          |
| P0027G10.30-1  | Acyl-Activating Enzyme 17-Like Protein          | At5g23050 | Acyl-Activating Enzyme 17 (AAE17)                                                                                                                                             |

|                |                                                 |           |                                                                                                                |
|----------------|-------------------------------------------------|-----------|----------------------------------------------------------------------------------------------------------------|
| P0028A08.21    | Putative Heat-Shock Protein                     | At2g04030 | CR88 (EMBRYO DEFECTIVE 1956); ATP Binding                                                                      |
| P0028G04.28    | Hypothetical Protein                            | At2g46930 | Pectinacetyltransferase, Putative                                                                              |
| P0028G04.9     | Hypothetical Protein                            | At5g19290 | Esterase/Lipase/Thioesterase Family Protein                                                                    |
| P0030D07.10    | Hypothetical Protein                            | At3g44530 | HIRA (ARABIDOPSIS HOMOLOG OF HISTONE CHAPERONE HIRA); Nucleotide Binding / Protein Binding                     |
| P0030D07.11    | Putative Magnesium/Proton Exchanger             | At2g47600 | ATMHX (MAGNESIUM/PROTON EXCHANGER); Cation:Cation Antiporter                                                   |
| P0030D07.8     | Pentatricopeptide (PPR) Repeat-Containing       | At2g26790 | Pentatricopeptide (PPR) Repeat-Containing Protein                                                              |
| P0030D07.9-1   | Putative Acyl-ACP Thioesterase                  | At1g08510 | FATB (FATTY ACYL-ACP THIOESTERASES B); Acyl Carrier/ Acyl-ACP Thioesterase                                     |
| P0030G02.24-1  | Unknown Protein                                 | At1g16290 | Unknown Protein                                                                                                |
| P0030G02.26    | Putative Glyceraldehyde-3-Phosphate             | At1g79530 | GAPCP-1; Glyceraldehyde-3-Phosphate Dehydrogenase                                                              |
| P0030G02.51    | Putative Copper-Exporting Atpase                | At5g44790 | RAN1 (RESPONSIVE-TO-ANTAGONIST1); Atpase, Coupled To Transmembrane Movement Of Ions, Phosphorylative Mechanism |
| P0030G11.13    | Putative Hosphatidylinositol/Phophatidylcholine | At4g39170 | SEC14 Cytosolic Factor, Putative / Phosphoglyceride Transfer Protein, Putative                                 |
| P0030G11.15    | Putative SMC3 Protein                           | At2g27170 | Ttn7 (Titan7)                                                                                                  |
| P0030H07.1     | Unknown Protein                                 | At2g37540 | Short-Chain Dehydrogenase/Reductase (SDR) Family Protein                                                       |
| P0030H07.13    | Putative Protein Kinase Xa21                    | At3g47110 | Leucine-Rich Repeat Transmembrane Protein Kinase, Putative                                                     |
| P0030H07.20    | Putative Aspartate--Trna Ligase                 | At4g33760 | Trna Synthetase Class II (D, K And N) Family Protein                                                           |
| P0031D02.12    | Unknown Protein                                 | At3g56290 | Unknown Protein                                                                                                |
| P0031D11.14    | Hypothetical Protein                            | At3g55350 | Unknown Protein                                                                                                |
| P0031D11.4     | Unknown Protein                                 | At2g39450 | Cation Efflux Family Protein                                                                                   |
| P0031D11.6     | Putative Protein Kinase AFC1                    | At3g53570 | AFC1 (ARABIDOPSIS FUS3-COMPLEMENTING GENE 1); Kinase                                                           |
| P0034A04.112   | 26S Proteasome Regulatory Subunit 4 Homolog     | At4g29040 | RPT2A (Regulatory Particle Triple-A 2A); Atpase                                                                |
| P0034A04.121   | Putative DNA Repair Protein Rhp54               | At3g42670 | CHR38 (Chromatin Remodeling 38); ATP Binding / DNA Binding / Helicase                                          |
| P0034A04.123   | Putative Ubiquitin-Activating Enzyme            | At5g06460 | ATUBA2 (Arabidopsis Thaliana Ubiquitin Activating Enzyme 2); Ubiquitin Activating Enzyme                       |
| P0034A04.127-2 | Pyruvate Decarboxylase Isozyme 3                | At4g33070 | Pyruvate Decarboxylase, Putative                                                                               |
| P0034A04.134-1 | Putative Omega-3 Fatty Acid Desaturase          | At5g05580 | FAD8 (FATTY ACID DESATURASE 8); Omega-3 Fatty Acid Desaturase                                                  |
| P0034C09.19    | Putative Ser/Thr Protein Phosphatase            | At1g50370 | Serine/Threonine Protein Phosphatase, Putative                                                                 |
| P0034C11.11    | Putative Receptor Protein Kinase                | At1g78530 | Protein Kinase Family Protein                                                                                  |
| P0034C11.24    | Unknown Protein                                 | At3g12530 | Psf2                                                                                                           |
| P0034E02.1     | Similar To Phosphate/Phosphoenolpyruvate        | At2g25520 | Phosphate Translocator-Related                                                                                 |
| P0034E02.27    | Cytochrome P450-Like Protein                    | At3g56630 | CYP94D2 (Cytochrome P450, Family 94, Subfamily D, Polypeptide 2); Oxygen Binding                               |
| P0034E02.36    | Putative Glucosyltransferase                    | At2g30140 | UDP-Glucuronosyl/UDP-Glucosyl Transferase Family Protein                                                       |
| P0034E02.39    | Hypothetical Protein                            | At2g26770 | Plectin-Related                                                                                                |
| P0034E02.40    | Tubulin Beta Chain                              | At5g12250 | Tub6 (Beta-6 Tubulin)                                                                                          |
| P0035F12.15    | Putative Reca Protein                           | At2g19490 | Reca Family Protein                                                                                            |
| P0035F12.16    | Unknown Protein                                 | At5g55120 | VTC5; Galactose-1-Phosphate Guanylyltransferase (GDP)                                                          |

|                |                                                 |           |                                                                                                                       |
|----------------|-------------------------------------------------|-----------|-----------------------------------------------------------------------------------------------------------------------|
| P0035H10.13    | Putative Knotted1-Type Homeobox Protein         | At4g08150 | KNAT1 (BREVIPEDICELLUS 1); Transcription Factor                                                                       |
| P0036E06.15    | Phospholipid/Glycerol Acyltransferase-Like      | At2g38110 | ATGPAT6/GPAT6 (GLYCEROL-3-PHOSPHATE ACYLTRANSFERASE 6); 1-Acylglycerol-3-Phosphate O-Acyltransferase/ Acyltransferase |
| P0036E06.16    | Putative SKP1 Interacting Partner               | At3g61350 | Skip4 (Skp1 Interacting Partner 4)                                                                                    |
| P0036E06.27-2  | Catalase (EC 1.11.1.6) Cata-Like Protein        | At1g20630 | CAT1 (CATALASE 1); Catalase                                                                                           |
| P0036E06.29    | Putative Dnak-Type Molecular Chaperone Bip      | At5g42020 | BIP (LUMINAL BINDING PROTEIN); ATP Binding                                                                            |
| P0038C05.1     | Hypothetical Protein                            | At3g15600 | Unknown Protein                                                                                                       |
| P0038C05.12    | Putative Peroxidase                             | At4g36430 | Peroxidase, Putative                                                                                                  |
| P0038C05.26    | Hypothetical Protein                            | At3g30390 | Amino Acid Transporter Family Protein                                                                                 |
| P0038D11.18    | Unknown Protein                                 | At1g15490 | Hydrolase, Alpha/Beta Fold Family Protein                                                                             |
| P0038D11.19    | Hypothetical Protein                            | At1g35110 | Ulp1 Protease Family Protein                                                                                          |
| P0038F09.39    | Gamma-Glutamylcysteine Synthetase               | At4g23100 | Rml1 (Phytoalexin Deficient 2, Root Meristemless 1)                                                                   |
| P0039A07.11    | Putative Ammonium Transporter                   | At2g38290 | Atamt2 (Ammonium Transporter 2)                                                                                       |
| P0039G05.11    | Florfenicol Resistance Protein-Like             | At1g60230 | Radical SAM Domain-Containing Protein                                                                                 |
| P0039H02.103   | Putative Syntaxin-Related Protein               | At5g08080 | SYP132 (Syntaxin 132); T-SNARE                                                                                        |
| P0039H02.105   | Putative Alpha 3 Glucosyltransferase            | At5g38460 | ALG6, ALG8 Glycosyltransferase Family Protein                                                                         |
| P0039H02.111   | Putative Prolyl-Trna Synthetase                 | At5g52520 | OVA6 (OVULE ABORTION 6); ATP Binding / Aminoacyl-Trna Ligase                                                          |
| P0039H02.112   | Putative Anthranilate Phosphoribosyltransferase | At5g17980 | C2 Domain-Containing Protein                                                                                          |
| P0039H02.131   | Unknown Protein                                 | At4g24290 | Unknown Protein                                                                                                       |
| P0039H02.137   | Putative Brassinosteroid LRR Receptor Kinase    | At3g03770 | Leucine-Rich Repeat Transmembrane Protein Kinase, Putative                                                            |
| P0039H02.138-1 | Osrad6                                          | At2g02760 | ATUBC2 (UBIQUITING-CONJUGATING ENZYME 2); Ubiquitin-Protein Ligase                                                    |
| P0040B10.15    | Putative Esterase                               | At1g10740 | Hypothetical Protein                                                                                                  |
| P0040B10.2     | Putative Leucine-Rich Repeat Family Protein     | At1g03440 | Leucine-Rich Repeat Family Protein                                                                                    |
| P0040B10.4     | Putative WD-40 Repeat Protein                   | At4g03020 | Transducin Family Protein / WD-40 Repeat Family Protein                                                               |
| P0040B10.6     | Unknown Protein                                 | At5g27320 | Atgid1c/Gid1c (Ga Insensitive Dwarf1c)                                                                                |
| P0040H05.31    | Unknown Protein                                 | At1g79390 | Unknown Protein                                                                                                       |
| P0041A24.3     | Unknown Protein                                 | At1g10240 | FRS11 (FAR1-RELATED SEQUENCE 11); Zinc Ion Binding                                                                    |
| P0042A10.14    | Hypothetical Protein                            | At1g26310 | CAL (CAULIFLOWER); DNA Binding / Transcription Factor                                                                 |
| P0042A10.6     | Similar To Phytochrome A Suppressor             | At1g53090 | SPA4 (SPA1-RELATED 4); Signal Transducer                                                                              |
| P0042A10.7     | Hypothetical Protein                            | At1g28290 | Pollen Ole E 1 Allergen And Extensin Family Protein                                                                   |
| P0042B03.17    | Putative Trehalose-Phosphatase                  | At1g35910 | Trehalose-6-Phosphate Phosphatase, Putative                                                                           |
| P0042B03.35    | Transporter-Like Protein                        | At5g10190 | Transporter-Related                                                                                                   |
| P0042D01.4     | Putative Phenylalanine Ammonia-Lyase            | At2g37040 | PAL1 (PHE AMMONIA LYASE 1); Phenylalanine Ammonia-Lyase                                                               |
| P0043B10.5     | Putative DNA-Dependent Atpase                   | At3g06400 | CHR11 (CHROMATIN-REMODELING PROTEIN 11); DNA-Dependent Atpase                                                         |
| P0044F08.16    | Putative WD40-Repeat Protein                    | At3g18060 | Transducin Family Protein / WD-40 Repeat Family Protein                                                               |

|                |                                                            |           |                                                                                                       |
|----------------|------------------------------------------------------------|-----------|-------------------------------------------------------------------------------------------------------|
| P0044F08.18    | Putative Spore Coat Protein                                | At1g23010 | Multi-Copper Oxidase Type I Family Protein                                                            |
| P0045D08.22    | Putative Ca <sup>2+</sup> -Dependent Lipid-Binding Protein | At5g11100 | C2 Domain-Containing Protein                                                                          |
| P0046D03.133   | Putative Prohibitin                                        | At4g28510 | Atphb1 (Prohibitin 1)                                                                                 |
| P0047B07.110-1 | Protoporphyrin IX Magnesium Chelatase (EC                  | At5g13630 | Gun5 (Genomes Uncoupled 5)                                                                            |
| P0047B07.111   | Hypothetical Protein                                       | At2g41770 | Unknown Protein                                                                                       |
| P0047B07.116   | Putative Serine Carboxypeptidase II-3 Precursor            | At3g63470 | SCPL40 (Serine Carboxypeptidase-Like 40); Serine Carboxypeptidase                                     |
| P0047E05.15-1  | Putative Ubiquitin Activating Enzyme                       | At1g05350 | Thif Family Protein                                                                                   |
| P0048B08.24-1  | Putative Cell Division Protein Ftsh3                       | At3g47060 | FTSH7 (Ftsh Protease 7); ATP-Dependent Peptidase/ Atpase/ Metallopeptidase                            |
| P0048B08.24-2  | Cell Division Protein Ftsh3-Like                           | At5g58870 | FTSH9 (Ftsh Protease 9); ATP-Dependent Peptidase/ Atpase/ Metallopeptidase                            |
| P0048D08.104   | MET-10+Related Protein-Like                                | At4g04670 | Met-10+ Like Family Protein / Kelch Repeat-Containing Protein                                         |
| P0048D08.105   | CDP2_ORYSA Calcium-Dependent Protein Kinase                | At4g04720 | CPK21 (Calcium-Dependent Protein Kinase 21); Calcium- And Calmodulin-Dependent Protein Kinase/ Kinase |
| P0048F12.1     | Unknown Protein                                            | At5g15930 | PAM1 (PLANT ADHESION MOLECULE 1); RAB Gtpase Activator                                                |
| P0048F12.11    | Putative Phospholipid/Glycerol Acyltransferase             | At1g02390 | ATGPAT2/GPAT2 (GLYCEROL-3-PHOSPHATE ACYLTRANSFERASE 2); Acyltransferase                               |
| P0135D07.12    | Dehydration-Responsive Family Protein-Like                 | At4g00750 | Dehydration-Responsive Family Protein                                                                 |
| P0135D07.18    | Membrane Bound O-Acyl Transferase-Like                     | At1g63050 | Membrane Bound O-Acyl Transferase (MBOAT) Family Protein                                              |
| P0135D07.26    | Membrane Protein-Like                                      | At4g23030 | MATE Efflux Protein-Related                                                                           |
| P0135D07.43    | Putative CRT/DRE Binding Factor 1                          | At4g25470 | CBF2 (FREEZING TOLERANCE QTL 4); DNA Binding / Transcription Factor/ Transcriptional Activator        |
| P0264G11.2-2   | Putative Racd Protein                                      | At4g35020 | ARAC3/ATROP6/RHO1PS/ROP6 (Rho-Related Protein From Plants 6); GTP Binding / Gtpase                    |
| P0401G10.21    | Putative Glucose Inhibited Division Protein A              | At2g13440 | Glucose-Inhibited Division Family A Protein                                                           |
| P0401G10.8     | Putative MLH1                                              | At4g09140 | ATMLH1 (Arabidopsis Thaliana Mutl-Homologue 1)                                                        |
| P0403C05.17    | Putative Formamidase                                       | At4g37550 | Formamidase                                                                                           |
| P0403C05.18    | Hypothetical Protein                                       | At2g33760 | Pentatricopeptide (PPR) Repeat-Containing Protein                                                     |
| P0403C05.2     | Hypothetical Protein                                       | At5g61010 | ATEXO70E2 (EXOCYST SUBUNIT EXO70 FAMILY PROTEIN E2); Protein Binding                                  |
| P0403C05.9     | Putative Chorismate Mutase Precursor                       | At1g69370 | CM3 (CHORISMATE MUTASE 3); Chorismate Mutase                                                          |
| P0404D10.16    | Stress Inducible Protein-Like                              | At1g22700 | Binding                                                                                               |
| P0404G11.106-1 | Putative ATP/GTP Nucleotide-Binding Protein                | At5g61450 | 2-Phosphoglycerate Kinase-Related                                                                     |
| P0406E03.14-2  | GDSL-Motif Lipase/Hydrolase-Like                           | At2g04570 | GDSL-Motif Lipase/Hydrolase Family Protein                                                            |
| P0406E03.15    | SWIB Complex BAF60b Domain-Containing                      | At4g26810 | SWIB Complex BAF60b Domain-Containing Protein                                                         |
| P0406E03.18    | Putative NADPH-Dependent Retinol                           | At4g05530 | Short-Chain Dehydrogenase/Reductase (SDR) Family Protein                                              |
| P0406E03.32-1  | Putative Chloroplast Drought-Induced Stress                | At4g04020 | FIB (FIBRILLIN); Structural Molecule                                                                  |
| P0406E03.33    | Transcriptional Regulators Of Nagc/Xylr                    | At1g30540 | Atpase, Badf/Badg/Bcra/Bcrd-Type Family                                                               |
| P0406F06.16    | Putative Organic Cation Transporter                        | At1g79360 | Transporter-Related                                                                                   |
| P0406F06.33    | Putative Chlorophyll A-B Binding Protein Of                | At5g54270 | Lhcb3 (Light-Harvesting Chlorophyll Binding Protein 3)                                                |
| P0406G08.10    | Laccase                                                    | At5g60020 | LAC17 (Laccase 17); Copper Ion Binding / Oxidoreductase                                               |

|                |                                                 |           |                                                                                               |
|----------------|-------------------------------------------------|-----------|-----------------------------------------------------------------------------------------------|
| P0406G08.13    | Putative AAA-Metalloprotease                    | At2g29080 | FTSH3 (Ftsh Protease 3); ATP-Dependent Peptidase/ Atpase                                      |
| P0407A09.6-1   | Transmembrane Protein-Like                      | At4g09810 | Transporter-Related                                                                           |
| P0407B12.19    | Putative UTP-Glucose Glucosyltransferase        | At1g01420 | UDP-Glucuronosyl/UDP-Glucosyl Transferase Family Protein                                      |
| P0407H12.144   | Breast Adenocarcinoma Marker-Like               | At2g06530 | SNF7 Family Protein                                                                           |
| P0408C03.13    | Putative SLT1 Protein (Ion Homeostasis Related) | At2g37570 | SlT1 (Sodium- And Lithium-Tolerant 1)                                                         |
| P0408C03.24    | Hypothetical Protein                            | At3g46550 | Sos5 (Salt Overly Sensitive 5)                                                                |
| P0408C03.8     | Putative Ubiquitin Carrier Protein UBC7         | At3g46460 | UBC13 (Ubiquitin-Conjugating Enzyme 13); Ubiquitin-Protein Ligase                             |
| P0408C03.9     | Osmotin-Like Protein                            | At2g28790 | Osmotin-Like Protein, Putative                                                                |
| P0408G07.2     | Hypothetical Protein                            | At2g03880 | Pentatricopeptide (PPR) Repeat-Containing Protein                                             |
| P0409B08.17    | Putative Reductase                              | At1g68540 | Oxidoreductase Family Protein                                                                 |
| P0409B08.21    | Putative Mannose-6-Phosphate Isomerase          | At3g02570 | MEE31 (Maternal Effect Embryo Arrest 31); Mannose-6-Phosphate Isomerase                       |
| P0409B08.27    | Putative Bifunctional Nuclease                  | At1g68290 | Bifunctional Nuclease, Putative                                                               |
| P0409B08.4     | Putative Transcription Factor                   | At3g48670 | XH/XS Domain-Containing Protein / XS Zinc Finger Domain-Containing Protein                    |
| P0409B11.10    | Putative Phosphoadenylyl-Sulfate Reductase      | At1g62180 | Apr2 (5'adenylylphosphosulfate Reductase 2)                                                   |
| P0409B11.17-2  | Putative Beta-1,3-Glucanase                     | At1g11820 | Hydrolase, Hydrolyzing O-Glycosyl Compounds                                                   |
| P0409B11.19    | Putative Glucosyltransferase                    | At5g66690 | UDP-Glucuronosyl/UDP-Glucosyl Transferase Family Protein                                      |
| P0409B11.32    | Putative PS60                                   | At1g76160 | SKS5 (SKU5 Similar 5); Copper Ion Binding / Oxidoreductase                                    |
| P0410E01.3     | Hypothetical Protein                            | At3g15650 | Phospholipase/Carboxylesterase Family Protein                                                 |
| P0410E01.31    | Putative Acetyl Transferase                     | At3g62160 | Transferase Family Protein                                                                    |
| P0410E02.2     | Putative Ethylene-Responsive Transcriptional    | At2g42680 | ATMBF1A/MBF1A (MULTIPROTEIN BRIDGING FACTOR 1A); DNA Binding / Transcription Coactivator      |
| P0410E02.38    | Hypothetical Protein                            | At5g05010 | Clathrin Adaptor Complexes Medium Subunit-Related                                             |
| P0410E03.13    | Putative H+-Transporting Atpase                 | At4g32530 | Vacuolar ATP Synthase, Putative / V-Atpase, Putative                                          |
| P0410E03.18    | Unknown Protein                                 | At5g27490 | Integral Membrane Yip1 Family Protein                                                         |
| P0410E03.20    | Hypothetical Protein                            | At1g11020 | Zinc Finger (C3HC4-Type RING Finger) Family Protein                                           |
| P0410E03.24    | Unknown Protein                                 | At5g11420 | Unknown Protein                                                                               |
| P0410E03.26    | Putative GTP-Binding Protein                    | At5g20010 | RAN-1 (Ras-Related GTP-Binding Nuclear Protein 1); GTP Binding                                |
| P0410E11.123-2 | Putative Glucose-1-Phosphate                    | At5g48300 | ADG1 (ADP GLUCOSE PYROPHOSPHORYLASE SMALL SUBUNIT 1); Glucose-1-Phosphate Adenylyltransferase |
| P0413A11.18    | Peroxisomal Fatty Acid Beta-Oxidation           | At4g29010 | AIM1 (ABNORMAL INFLORESCENCE MERISTEM); Enoyl-Coa Hydratase                                   |
| P0413A11.38-1  | Putative Sugar Transporter                      | At1g79820 | SGB1; Carbohydrate Transporter/ Sugar Porter                                                  |
| P0413A11.38-2  | Putative Sugar Transporter                      | At1g67300 | Hexose Transporter, Putative                                                                  |
| P0413C03.28    | Putative Ubiquitin-Like Protein                 | At5g48710 | Ubiquitin-Related                                                                             |
| P0413C03.5     | Putative Gamma-Adaptin 1                        | At1g31730 | Epsilon-Adaptin, Putative                                                                     |
| P0413C03.8     | Putative Selenium Binding Protein               | At4g14030 | Selenium-Binding Protein, Putative                                                            |
| P0413C03.9     | Putative Glycine-Rich RNA-Binding Protein 2     | At5g61030 | GR-RBP3 (Glycine-Rich RNA-Binding Protein 3); RNA Binding                                     |

|               |                                                  |           |                                                                                                                                                                                                                                                      |
|---------------|--------------------------------------------------|-----------|------------------------------------------------------------------------------------------------------------------------------------------------------------------------------------------------------------------------------------------------------|
| P0413G02.1    | Putative Cytokinin Oxidase                       | At1g75450 | CKX5 (CYTOKININ OXIDASE 5); Cytokinin Dehydrogenase                                                                                                                                                                                                  |
| P0413G02.11   | Putative Purple Acid Phosphatase                 | At2g16430 | PAP10; Acid Phosphatase/ Protein Serine/Threonine Phosphatase                                                                                                                                                                                        |
| P0413G02.15   | Putative Low Density Lipoprotein                 | At5g16300 | Hypothetical Protein                                                                                                                                                                                                                                 |
| P0413H11.35   | Putative Chlorophyll A/B-Binding Protein         | At3g47470 | LHCA4 (Photosystem I Light Harvesting Complex Gene 4); Chlorophyll Binding                                                                                                                                                                           |
| P0413H11.37   | Putative Polypyrimidine Tract-Binding Protein    | At3g01150 | PTB (POLYPYRIMIDINE TRACT-BINDING); RNA Binding                                                                                                                                                                                                      |
| P0415A04.13   | Peroxidase-Like Protein                          | At5g15180 | Peroxidase, Putative                                                                                                                                                                                                                                 |
| P0415A04.19   | Unknown Protein                                  | At5g10300 | Hydrolase, Alpha/Beta Fold Family Protein                                                                                                                                                                                                            |
| P0415A04.24   | Putative Nuclear Transport Factor 2              | At1g27970 | Ntf2b (Nuclear Transport Factor 2b)                                                                                                                                                                                                                  |
| P0415A04.26   | Putative Pectin Esterase                         | At1g11580 | Pectin Methylesterase, Putative                                                                                                                                                                                                                      |
| P0415A04.27   | Disease Resistance Protein-Like                  | At5g43740 | Disease Resistance Protein (CC-NBS-LRR Class), Putative                                                                                                                                                                                              |
| P0415B12.4    | RNA Binding Protein Rp120                        | At5g07350 | Tudor Domain-Containing Protein / Nuclease Family Protein                                                                                                                                                                                            |
| P0415C01.11   | Unknown Protein                                  | At5g64780 | Unknown Protein                                                                                                                                                                                                                                      |
| P0416G11.10   | Unknown Protein                                  | At2g47970 | NPL4 Family Protein                                                                                                                                                                                                                                  |
| P0416G11.15   | Putative Peroxidase Isozyme 38K Precursor        | At2g39040 | Peroxidase, Putative                                                                                                                                                                                                                                 |
| P0417F02.7    | Hexokinase II                                    | At1g47840 | Hexokinase, Putative                                                                                                                                                                                                                                 |
| P0417G05.10   | Putative Receptor Kinase                         | At4g23740 | Leucine-Rich Repeat Transmembrane Protein Kinase, Putative                                                                                                                                                                                           |
| P0418E08.114  | Putative UDP-Glucosyltransferase                 | At3g11340 | UDP-Glucuronosyl/UDP-Glucosyl Transferase Family Protein                                                                                                                                                                                             |
| P0418E08.117  | Putative UDP-Glucosyltransferase                 | At3g55710 | UDP-Glucuronosyl/UDP-Glucosyl Transferase Family Protein                                                                                                                                                                                             |
| P0419A09.30   | Putative Ethylene Response Factor                | At5g25390 | SHN2 (SHINE2); DNA Binding / Transcription Factor                                                                                                                                                                                                    |
| P0419A09.31   | Putative DEAD Box                                | At3g01540 | DRH1 (DEAD Box RNA Helicase 1)                                                                                                                                                                                                                       |
| P0419A09.34   | Putative SPX (SYG1/Pho81/XPR1) Domain-Containing | At2g26660 | SPX (SYG1/Pho81/XPR1) Domain-Containing Protein                                                                                                                                                                                                      |
| P0419A09.6-1  | 26S Proteasome Regulatory Particle Triple-A      | At1g45000 | 26S Proteasome Regulatory Complex Subunit P42d, Putative                                                                                                                                                                                             |
| P0419A09.7    | Putative SEC14 Cytosolic Factor (SEC14)          | At1g55840 | SEC14 Cytosolic Factor (SEC14) / Phosphoglyceride Transfer Protein                                                                                                                                                                                   |
| P0419B01.17   | Hypothetical Protein                             | At4g36690 | ATU2AF65A; RNA Binding                                                                                                                                                                                                                               |
| P0419B01.2    | Nucleotide Pyrophosphatase Homolog               | At4g29680 | Type I Phosphodiesterase/Nucleotide Pyrophosphatase Family Protein                                                                                                                                                                                   |
| P0419B01.5    | Cytochrome P450-Like Protein                     | At3g13730 | CYP90D1 (CYTOCHROME P450, FAMILY 90, SUBFAMILY D, POLYPEPTIDE 1); Oxidoreductase, Acting On Paired Donors, With Incorporation Or Reduction Of Molecular Oxygen, NADH Or NADPH As One Donor, And Incorporation Of One Atom Of Oxygen / Oxygen Binding |
| P0419B01.6    | Putative Ethylene-Responsive RNA Helicase        | At1g55150 | DEAD Box RNA Helicase, Putative (RH20)                                                                                                                                                                                                               |
| P0419C03.10-1 | Unknown Protein                                  | At1g14780 | Unknown Protein                                                                                                                                                                                                                                      |
| P0419C04.13   | Hypothetical Protein                             | At5g56530 | Hypothetical Protein                                                                                                                                                                                                                                 |
| P0419C04.2    | Unknow Protein                                   | At3g51610 | Unknown Protein                                                                                                                                                                                                                                      |
| P0419C04.8    | 'Putative 60S Ribosomal Protein, L10'            | At1g26910 | 60S Ribosomal Protein L10 (RPL10B)                                                                                                                                                                                                                   |
| P0419H03.23   | Phytosulfokine Receptor Precursor-Like           | At1g17240 | Leucine-Rich Repeat Family Protein                                                                                                                                                                                                                   |



|              |                                                  |           |                                                                                                      |
|--------------|--------------------------------------------------|-----------|------------------------------------------------------------------------------------------------------|
| P0419H03.34  | Putative Receptor Mediated Endocytosis RME-1     | At4g05520 | Calcium-Binding EF Hand Family Protein                                                               |
| P0419H03.37  | Putative Chain C, Structure Of The Plant         | At1g71260 | Atwhy2 (A. Thaliana Whirly 2); Dna Binding                                                           |
| P0421H07.18  | RING Zinc Finger Protein                         | At4g26580 | Protein Binding / Zinc Ion Binding                                                                   |
| P0421H07.20  | Putative Farnesyl-Pyrophosphate Synthetase       | At5g47770 | FPS1 (FARNESYL DIPHOSPHATE SYNTHASE 1); Dimethylallyltranstransferase/<br>Geranyltranstransferase    |
| P0423A12.15  | Hypothetical Protein                             | At4g31380 | Flp1 (Fpf1-Like Protein 1)                                                                           |
| P0423A12.18  | Putative Glutathione S-Transferase               | At3g62760 | ATGSTF13 (Arabidopsis Thaliana Glutathione S-Transferase (Class Phi) 13); Glutathione<br>Transferase |
| P0423A12.19  | Hypothetical Protein                             | At3g62770 | Atatg18a (Arabidopsis Thaliana Homolog Of Yeast Autophagy 18 (ATG18) A)                              |
| P0423B08.13  | Putative I-Box Binding Factor                    | At5g04760 | Myb Family Transcription Factor                                                                      |
| P0423B08.7   | Unknown Protein                                  | At5g06140 | Phox (PX) Domain-Containing Protein                                                                  |
| P0426D06.10  | Unknown Protein                                  | At4g01810 | Protein Transport Protein-Related                                                                    |
| P0426D06.17  | Unknown Protein                                  | At1g73720 | Transducin Family Protein / WD-40 Repeat Family Protein                                              |
| P0426D06.20  | Putative Protein Kinase                          | At1g56720 | Protein Kinase Family Protein                                                                        |
| P0426D06.21  | Putative Pto Kinase Interactor 1                 | At3g17410 | Serine/Threonine Protein Kinase, Putative                                                            |
| P0426D06.8   | Putative Seca-Type Chloroplast Protein Transport | At4g01800 | Preprotein Translocase Seca Subunit, Putative                                                        |
| P0427D10.102 | Putative ATP-Dependent RNA Helicase              | At3g09720 | DEAD/DEAH Box Helicase, Putative                                                                     |
| P0427G12.14  | Putative Endoglucanase 1 Precursor               | At1g02800 | ATCEL2 (Arabidopsis Thaliana Cellulase 2); Hydrolase, Hydrolyzing O-Glycosyl Compounds               |
| P0427G12.16  | Putative Oxidase-Like                            | At2g46760 | FAD-Binding Domain-Containing Protein                                                                |
| P0428D12.112 | Putative Ubiquitin-Specific Protease             | At5g06600 | UBP12 (UBIQUITIN-SPECIFIC PROTEASE 12); Ubiquitin-Specific Protease                                  |
| P0429B05.10  | Putative Receptor-Like Protein Kinase            | At1g73080 | PEPR1 (PEP1 RECEPTOR 1); ATP Binding / Kinase/ Protein Binding / Protein<br>Serine/Threonine Kinase  |
| P0429B05.26  | Putative Phosphoglycerate Dehydrogenase          | At1g17740 | Unknown Protein                                                                                      |
| P0429B05.28  | Suppressor-Like Protein                          | At5g65490 | Unknown Protein                                                                                      |
| P0429B05.37  | Putative Adenylyl Cyclase Associated Protein     | At4g34490 | Atcap1 (Cyclase Associated Protein 1)                                                                |
| P0429B05.38  | Putative 4-Coumarate-Coa Ligase                  | At3g21240 | 4CL2 (4-Coumarate:Coa Ligase 2); 4-Coumarate-Coa Ligase                                              |
| P0430F03.1   | Putative MATE Efflux Protein Family Protein      | At3g23560 | ALF5 (ABERRANT LATERAL ROOT FORMATION 5); Antiporter/ Transporter                                    |
| P0430F03.13  | Putative Glucosyltransferase                     | At2g18570 | UDP-Glucuronosyl/UDP-Glucosyl Transferase Family Protein                                             |
| P0431A02.33  | Putative Zeta-Carotene Desaturase Precursor      | At3g04870 | ZDS (ZETA-CAROTENE DESATURASE); Carotene 7,8-Desaturase                                              |
| P0431A03.1   | Unknown Protein                                  | At1g68660 | Unknown Protein                                                                                      |
| P0431A03.16  | Putative Transmembrane Protein                   | At1g25520 | Unknown Protein                                                                                      |
| P0431A03.17  | Unknown Protein                                  | At1g70900 | Unknown Protein                                                                                      |
| P0431A03.26  | Ribonuclease                                     | At1g26820 | RNS3 (RIBONUCLEASE 3); Endoribonuclease                                                              |
| P0431B06.14  | Pentatricopeptide (PPR) Repeat-Containing        | At4g39620 | EMB2453 (EMBRYO DEFECTIVE 2453); Binding                                                             |
| P0431B06.16  | Putative NTGP5                                   | At1g22050 | Ubiquitin Family Protein                                                                             |
| P0431B06.25  | Aspartyl Protease-Like                           | At5g10080 | Aspartyl Protease Family Protein                                                                     |

|                |                                                  |           |                                                                                                                                                |
|----------------|--------------------------------------------------|-----------|------------------------------------------------------------------------------------------------------------------------------------------------|
| P0431B06.40    | Putative Phosphoglycerate Mutase                 | At1g22170 | Phosphoglycerate/Bisphosphoglycerate Mutase Family Protein                                                                                     |
| P0431B06.41    | Putative Inositol Polyphosphate 5-Phosphatase I  | At5g65090 | BST1 (BRISTLED1); Hydrolase                                                                                                                    |
| P0431B06.43    | Putative Beta-D-Xylosidase                       | At1g78060 | Glycosyl Hydrolase Family 3 Protein                                                                                                            |
| P0431B06.5     | Putative SEC6                                    | At1g71820 | Unknown Protein                                                                                                                                |
| P0431G06.20    | Putative NADPH:Quinone Oxidoreductase            | At3g27890 | NQR (NADPH:QUINONE OXIDOREDUCTASE); FMN Reductase                                                                                              |
| P0431G06.4     | Hypothetical Protein                             | At5g19420 | Zinc Finger Protein, Putative / Regulator Of Chromosome Condensation (RCC1) Family Protein                                                     |
| P0431H09.18    | Unknown Protein                                  | At4g25940 | Epsin N-Terminal Homology (ENTH) Domain-Containing Protein                                                                                     |
| P0432B10.6     | Putative 60S Ribosomal Protein L30               | At1g36240 | 60S Ribosomal Protein L30 (RPL30A)                                                                                                             |
| P0432C03.20    | Hypothetical Protein                             | At3g10150 | ATPAP16/PAP16 (Purple Acid Phosphatase 16); Acid Phosphatase/ Protein Serine/Threonine Phosphatase                                             |
| P0432C03.7     | Beta 1,3-Glucanase                               | At3g57270 | BG1 (BETA-1,3-GLUCANASE 1); Hydrolase, Hydrolyzing O-Glycosyl Compounds                                                                        |
| P0434A03.105-2 | Putative NEP1-Interacting Protein 2              | At2g17730 | Zinc Finger (C3HC4-Type RING Finger) Family Protein                                                                                            |
| P0434A03.107   | Putative Mannose-P-Dolichol Utilization Defect 1 | At5g59470 | PQ-Loop Repeat Family Protein / Transmembrane Family Protein                                                                                   |
| P0434A03.108   | Carboxypeptidase C Cbp31                         | At3g10410 | SCPL49 (Serine Carboxypeptidase-Like 49); Serine Carboxypeptidase                                                                              |
| P0434A03.111-2 | Unknown Protein                                  | At5g22950 | SNF7 Family Protein                                                                                                                            |
| P0434A03.134   | Putative Xyloglucan Endo-Transglycosylase        | At2g36870 | Xyloglucan:Xyloglucosyl Transferase, Putative / Xyloglucan Endotransglycosylase, Putative / Endo-Xyloglucan Transferase, Putative              |
| P0434A03.135   | Putative Cysteine Proteinase                     | At3g54940 | Cysteine Proteinase, Putative                                                                                                                  |
| P0434A03.138   | Unknown Protein                                  | At4g38430 | ATROPGEF1/ROPGEF1 (KINASE PARTNER PROTEIN-LIKE); Rho Guanyl-Nucleotide Exchange Factor/ Protein Binding                                        |
| P0434B04.10    | Putative Triose-Phosphate Isomerase              | At3g55440 | ATCTIMC (CYTOSOLIC TRIOSE PHOSPHATE ISOMERASE); Triose-Phosphate Isomerase                                                                     |
| P0434B04.12    | Putative CER3                                    | At5g02310 | CER3 (ECERIFERUM 3); Protein Binding / Ubiquitin-Protein Ligase/ Zinc Ion Binding                                                              |
| P0434B04.3     | Unknown Protein                                  | At1g32130 | Unknown Protein                                                                                                                                |
| P0434B04.34    | Putative Glycoprotein                            | At3g55360 | ATTSC13/CER10/ECR/TSC13 (ENOYL-COA REDUCTASE); 3-Oxo-5-Alpha-Steroid 4-Dehydrogenase/ Fatty Acid Elongase/ Trans-2-Enoyl-Coa Reductase (NADPH) |
| P0434C04.32    | Putative Seven Transmembrane Protein             | At4g02600 | ATMLO1/MLO1 (MILDEW RESISTANCE LOCUS O 1); Calmodulin Binding                                                                                  |
| P0434E03.15    | Putative Avr9 Elicitor Response Protein          | At5g53340 | Transferase, Transferring Hexosyl Groups                                                                                                       |
| P0434E03.23    | Unknown Protein                                  | At1g11540 | Unknown Protein                                                                                                                                |
| P0434E03.25    | Putative Cellulase                               | At4g23560 | Glycosyl Hydrolase Family 9 Protein                                                                                                            |
| P0435B05.15    | Putative Ribosomal Protein L18a, Cytosolic       | At2g34480 | 60S Ribosomal Protein L18A (RPL18aB)                                                                                                           |
| P0435B05.19    | Putative GTP-Binding Protein                     | At2g31060 | GTP Binding / Translation Elongation Factor                                                                                                    |
| P0435B05.32    | Putative Glucan Synthase                         | At4g03550 | ATGSL05 (GLUCAN SYNTHASE-LIKE 5); 1,3-Beta-Glucan Synthase/ Transferase, Transferring Glycosyl Groups                                          |
| P0435E12.12    | Putative 12-Oxophytodienoic Acid Reductase       | At1g76680 | OPR1 (12-Oxophytodienoate Reductase 1); 12-Oxophytodienoate Reductase                                                                          |
| P0435E12.43    | Unknown Protein                                  | At2g44090 | Unknown Protein                                                                                                                                |
| P0436B05.15    | Hypothetical Protein                             | At5g24630 | Bin4 (Brassinosteroid-Insensitive4)                                                                                                            |
| P0436B06.11    | Putative UDP-Glucose 4-Epimerase                 | At4g10960 | UGE5 (UDP-D-Glucose/UDP-D-Galactose 4-Epimerase 5); UDP-Glucose 4-Epimerase/ Protein Dimerization                                              |

|               |                                                 |           |                                                                         |
|---------------|-------------------------------------------------|-----------|-------------------------------------------------------------------------|
| P0436B06.29   | Selenium-Binding Protein-Like                   | At3g25970 | Pentatricopeptide (PPR) Repeat-Containing Protein                       |
| P0436D06.12   | Putative Oxalyl-Coa Decarboxylase               | At5g17380 | Pyruvate Decarboxylase Family Protein                                   |
| P0436D06.2    | Hypothetical Protein                            | At1g15170 | MATE Efflux Family Protein                                              |
| P0436E04.21   | Putative Benzoyltransferase                     | At2g40230 | Transferase Family Protein                                              |
| P0436E04.9    | Putative Receptor Ser/Thr Protein Kinase        | At1g52310 | Protein Kinase Family Protein / C-Type Lectin Domain-Containing Protein |
| P0437G01.10   | Putative Cytochrome P450 Reductase              | At4g30210 | Atr2 (Arabidopsis P450 Reductase 2)                                     |
| P0437G01.11   | Putative HAD-Superfamily Hydrolase              | At4g25840 | GPP1 (GLYCEROL-3-PHOSPHATASE 1); Hydrolase                              |
| P0437G01.17   | Unknown Protein                                 | At5g57460 | Protein Binding / Protein Transporter                                   |
| P0437H03.127  | Unknown Protein                                 | At2g22370 | Unknown Protein                                                         |
| P0437H03.131  | Putative SWIRM Domain-Containing Protein        | At2g33610 | ATSWI3B (Arabidopsis Thaliana Switching Protein 3B); DNA Binding        |
| P0437H03.132  | Citrate Synthase                                | At2g44350 | ATCS (CITRATE SYNTHASE 4); Citrate (SI)-Synthase                        |
| P0437H03.136  | Putative Extra Sporogenous Cells                | At5g07280 | EMS1 (EXCESS MICROSPOROCTES1); Kinase                                   |
| P0438H08.18   | Putative Vesicle-Associated Membrane            | At2g45140 | Vesicle-Associated Membrane Protein, Putative / VAMP, Putative          |
| P0438H08.20   | Putative Ribosomal Protein L34                  | At1g26880 | 60S Ribosomal Protein L34 (RPL34A)                                      |
| P0438H08.29   | Putative Caffeic Acid 3-O-Methyltransferase     | At5g54160 | Atomt1 (O-Methyltransferase 1)                                          |
| P0439B06.12   | Unknown Protein                                 | At1g68780 | Leucine-Rich Repeat Family Protein                                      |
| P0439B06.21   | Putative E12A11 Protein                         | At1g18100 | E12A11; Phosphatidylethanolamine Binding                                |
| P0439B06.32   | Unknown Protein                                 | At3g03440 | Armadillo/Beta-Catenin Repeat Family Protein                            |
| P0439B06.7    | Putative Acetoacyl-Coa-Thiolase                 | At5g47720 | Acetyl-Coa C-Acetyltransferase                                          |
| P0439B07.24   | Putative Dihydroneopterin Aldolase              | At5g62980 | Dihydroneopterin Aldolase, Putative                                     |
| P0439B07.4    | Putative PHG1A Protein                          | At2g24170 | Endomembrane Protein 70, Putative                                       |
| P0439E07.11   | Putative Hexokinase I                           | At4g29130 | ATHXK1 (GLUCOSE INSENSITIVE 2); ATP Binding / Hexokinase                |
| P0439E07.15   | Putative Pectin Methylesterase                  | At5g19730 | Pectinesterase Family Protein                                           |
| P0439E07.9    | Putative Dehydrogenase                          | At4g29120 | 6-Phosphogluconate Dehydrogenase NAD-Binding Domain-Containing Protein  |
| P0439E11.14   | Unknown Protein                                 | At5g19090 | Heavy-Metal-Associated Domain-Containing Protein                        |
| P0439E11.8    | Unknown Protein                                 | At1g31470 | Nfd4 (Nuclear Fusion Defective 4)                                       |
| P0440D10.18   | Putative Tetrafunctional Protein Of Glyoxysomal | At3g06860 | MFP2 (MULTIFUNCTIONAL PROTEIN); Enoyl-Coa Hydratase                     |
| P0440D10.23   | Mannose-Binding Rice Lectin                     | At1g19720 | Pentatricopeptide (PPR) Repeat-Containing Protein                       |
| P0441A12.12-1 | Putative AKIN Beta3                             | At2g28060 | Protein Kinase-Related                                                  |
| P0441A12.23   | Putative Syringolide-Induced Protein B13-1-1    | At4g39830 | L-Ascorbate Oxidase, Putative                                           |
| P0443G08.126  | Putative Tyrosyl-Trna Synthetase                | At2g33840 | Trna Synthetase Class I (W And Y) Family Protein                        |
| P0443G08.138  | Putative Monodehydroascorbate Reductase         | At1g63940 | Monodehydroascorbate Reductase, Putative                                |
| P0443H10.10   | Unknown Protein                                 | At1g51580 | KH Domain-Containing Protein                                            |
| P0444A09.11   | Putative Kaurene Synthase A                     | At4g02780 | GA1 (GA REQUIRING 1); Ent-Copalyl Diphosphate Synthase                  |
| P0445D12.3    | Putative ABC Transporter                        | At2g01320 | ABC Transporter Family Protein                                          |

|               |                                                 |           |                                                                                                              |
|---------------|-------------------------------------------------|-----------|--------------------------------------------------------------------------------------------------------------|
| P0445D12.4    | Unknown Protein                                 | At1g71070 | Glycosyltransferase Family 14 Protein / Core-2/I-Branching Enzyme Family Protein                             |
| P0445E10.3    | Putative CAD Atpase                             | At1g80350 | ERH3 (ECTOPIC ROOT HAIR 3); ATP Binding / Nucleoside-Triphosphatase/ Nucleotide Binding                      |
| P0446B05.17   | Putative Protein Phosphatase 2C                 | At1g07430 | Protein Phosphatase 2C, Putative / PP2C, Putative                                                            |
| P0446B05.2    | Unknown Protein                                 | At5g02190 | PCS1 (PROMOTION OF CELL SURVIVAL1); Aspartic-Type Endopeptidase/ Peptidase                                   |
| P0446B05.20   | Ankyrin-Like Protein                            | At2g39750 | Dehydration-Responsive Family Protein                                                                        |
| P0446B05.22   | Unknown Protein                                 | At3g55580 | Regulator Of Chromosome Condensation (RCC1) Family Protein                                                   |
| P0446F04.116  | Putative 1-Aminocyclopropane-1-Carboxylate      | At1g50960 | ATGA2OX7 (GIBBERELLIN 2-OXIDASE 7); Gibberellin 2-Beta-Dioxygenase/ Gibberellin 20-Oxidase                   |
| P0446G04.10   | Putative NADH Dehydrogenase                     | At1g07180 | NDA1 (ALTERNATIVE NAD(P)H DEHYDROGENASE 1); NADH Dehydrogenase                                               |
| P0446G04.23   | Unknown Protein                                 | At5g58560 | Phosphatidate Cytidylyltransferase Family Protein                                                            |
| P0446G04.4    | Hypothetical Protein                            | At3g57070 | Glutaredoxin Family Protein                                                                                  |
| P0446G04.7    | Putative NAD-Malate Dehydrogenase               | At3g47520 | MDH (Malate Dehydrogenase); Malate Dehydrogenase                                                             |
| P0446G04.9    | Putative ABC Transporter                        | At4g04770 | Atabc1 (Arabidopsis Thaliana Nucleosome Assembly Protein 1)                                                  |
| P0446G09.124  | Putative Pentatricopeptide (PPR)                | At1g71490 | Pentatricopeptide (PPR) Repeat-Containing Protein                                                            |
| P0448B11.50-1 | DNA Helicase-Like                               | At5g35970 | DNA-Binding Protein, Putative                                                                                |
| P0450A04.116  | Putative Sodium/Proton Antiporter               | At3g05030 | NHX2 (Sodium Proton Exchanger 2)                                                                             |
| P0450A04.117  | Putative Tubby Related Protein                  | At2g47900 | Attlp3 (TUBBY LIKE PROTEIN 3); Phosphoric Diester Hydrolase/ Transcription Factor                            |
| P0450A04.119  | Putative Beta-Amylase                           | At5g18670 | BMV3 (Beta-Amylase 3); Beta-Amylase                                                                          |
| P0450A04.129  | Putative CRK1 Protein(Cdc2-Related Kinase 1)    | At1g54610 | Protein Kinase Family Protein                                                                                |
| P0450B04.1    | Putative P450                                   | At2g30770 | CYP71A13 (Cytochrome P450, Family 71, Subfamily A, Polypeptide 13); Oxygen Binding                           |
| P0450B04.20-1 | Putative GDP-Mannose Transporter                | At2g13650 | Gonst1 (Golgi Nucleotide Sugar Transporter 1)                                                                |
| P0450B04.21   | Putative Shwachman-Bodian-Diamond Syndrome      | At1g43860 | Transcription Factor                                                                                         |
| P0450B04.29   | Putative Mago Nashi                             | At1g02140 | MEE63 (Maternal Effect Embryo Arrest 63)                                                                     |
| P0450B04.3-1  | Putative Cytochrome P450 71C4                   | At4g13310 | CYP71A20 (Cytochrome P450, Family 71, Subfamily A, Polypeptide 20); Oxygen Binding                           |
| P0451A10.15   | Putative Vacuolar ATP Synthase 16 Kda           | At1g19910 | AVA-P2 (Vacuolar-H+-Pumping Atpase 16 Kda Proteolipid Subunit 2); Atpase                                     |
| P0451A10.27   | Putative Alkaline/Neutral Invertase             | At4g09510 | Beta-Fructofuranosidase, Putative / Invertase, Putative / Saccharase, Putative / Beta-Fructosidase, Putative |
| P0451A10.31   | Putative Polymyositis/Scleroderma Autoantigen 1 | At3g60500 | 3' Exoribonuclease Family Protein                                                                            |
| P0451A10.34-2 | Putative Far-Red Impaired Response Protein      | At5g18960 | FRS12 (FAR1-RELATED SEQUENCE 12); Zinc Ion Binding                                                           |
| P0451A10.9-1  | Unknown Protein                                 | At2g17050 | Disease Resistance Protein (TIR-NBS-LRR Class), Putative                                                     |
| P0451D05.22   | Putative Mutator-Like Transposase               | At3g04605 | Transposable Element Gene                                                                                    |
| P0451D05.26   | Hypothetical Protein                            | At3g24420 | Hydrolase, Alpha/Beta Fold Family Protein                                                                    |
| P0451G12.16   | Putative SEC23                                  | At2g21630 | Transport Protein, Putative                                                                                  |
| P0451G12.21   | Putative Prmc3                                  | At1g47480 | Unknown Protein                                                                                              |
| P0451G12.24   | Putative Prmc3                                  | At3g48690 | Unknown Protein                                                                                              |

|               |                                                  |           |                                                                                                       |
|---------------|--------------------------------------------------|-----------|-------------------------------------------------------------------------------------------------------|
| P0451G12.3    | Alpha-Amylase Isozyme 3E Precursor               | At4g25000 | AMY1 (ALPHA-AMYLASE-LIKE); Alpha-Amylase                                                              |
| P0451H06.1    | Putative Poly(A)-Binding Protein                 | At1g49760 | PAB8 (POLY(A) BINDING PROTEIN 8); RNA Binding / Translation Initiation Factor                         |
| P0452F04.18-2 | Putative Non-Transporter ABC Protein Abcf1       | At1g64550 | ATGCN3 (Arabidopsis Thaliana General Control Non-Repressible 3)                                       |
| P0452F04.20   | Putative Disease Resistance Protein Hcr2-5D      | At3g15410 | Leucine-Rich Repeat Family Protein                                                                    |
| P0452F04.25   | Putative Prolyl 4-Hydroxylase                    | At1g20270 | Oxidoreductase, 2OG-Fe(II) Oxygenase Family Protein                                                   |
| P0452F04.30   | Unknown Protein                                  | At5g08400 | Unknown Protein                                                                                       |
| P0452F04.33-1 | UDP-Glucuronosyl/UDP-Glucosyl Transferase Family | At1g64100 | DNA Binding / Binding                                                                                 |
| P0452F04.34   | Unknown Protein                                  | At1g73390 | Unknown Protein                                                                                       |
| P0452F04.36   | Unknown Protein                                  | At3g19990 | Binding                                                                                               |
| P0452F10.16   | Hypothetical Protein                             | At3g24570 | Peroxisomal Membrane 22 Kda Family Protein                                                            |
| P0452F10.19   | Putative Caulobacter Crescentus D-Isomer         | At1g79870 | Oxidoreductase Family Protein                                                                         |
| P0452F10.6    | RAS-Related GTP-Binding Protein Rab7 Family      | At1g52280 | Atrabg3d (Arabidopsis Rab Gtpase Homolog G3d); GTP Binding                                            |
| P0453D01.16-1 | Unknown Protein                                  | At2g35150 | Phosphate-Responsive 1 Family Protein                                                                 |
| P0453D01.4    | Putative High Affinity Sulfate Transporter       | At4g08620 | SULTR1;1 (Sulfate Transporter 1;1); Sulfate Transporter                                               |
| P0453E03.104  | Unknown Protein                                  | At3g57320 | Unknown Protein                                                                                       |
| P0453E03.107  | Pentatricopeptide (PPR)Repeat-Containing         | At1g01970 | Pentatricopeptide (PPR) Repeat-Containing Protein                                                     |
| P0453E03.111  | Putative Translation Elongation Factor Eef-1     | At5g19510 | Elongation Factor 1B Alpha-Subunit 2 (Eef1balpha2)                                                    |
| P0453E03.113  | Selenium-Binding Protein-Like                    | At2g29760 | Pentatricopeptide (PPR) Repeat-Containing Protein                                                     |
| P0453E05.113  | Putative Cyclin-Dependent Kinase CDC2C           | At1g18670 | IBS1 (IMPAIRED IN BABA-INDUCED STERILITY 1); Kinase                                                   |
| P0453E05.118  | Translation Initiation Factor 5A                 | At1g13950 | EIF-5A (Eukaryotic Translation Initiation Factor 5A-1); Translation Initiation Factor                 |
| P0453E05.123  | Unknown Protein                                  | At5g39410 | Unknown Protein                                                                                       |
| P0453E05.124  | Putative Brassinosteroid Insensitive 1           | At1g74360 | Leucine-Rich Repeat Transmembrane Protein Kinase, Putative                                            |
| P0453G03.27   | Putative Geranylgeranyl Diphosphate Synthase     | At4g36810 | GGPS1 (GERANYLGERANYL PYROPHOSPHATE SYNTHASE 1); Farnesyltranstransferase                             |
| P0453G03.28   | Transporter-Related-Like                         | At5g57100 | Transporter-Related                                                                                   |
| P0453H10.11   | Putative Protein Phosphatase 2A 48 Kda           | At5g28900 | Calcium-Binding EF Hand Family Protein                                                                |
| P0453H10.23   | Unknown Protein                                  | At1g52000 | Jacalin Lectin Family Protein                                                                         |
| P0453H10.31   | Putative Cellulose Synthase-Like Protein         | At5g22740 | ATCSLA02 (Cellulose Synthase-Like A2); Transferase, Transferring Glycosyl Groups                      |
| P0454A11.10   | NPK1-Related Protein Kinase-Like Protein         | At3g07980 | MAPKKK6 (MAP3K EPSILON PROTEIN KINASE 2); Kinase                                                      |
| P0454A11.12   | NPK1-Related Protein Kinase-Like Protein         | At5g08590 | ASK2 (ARABIDOPSIS SERINE/THREONINE KINASE 2); Kinase                                                  |
| P0454A11.14   | Putative Plasma Membrane Associated Protein      | At1g29520 | AWPM-19-Like Membrane Family Protein                                                                  |
| P0454A11.19   | Putative Flavonoid 3',5'-Hydroxylase             | At5g44620 | CYP706A3 (Cytochrome P450, Family 706, Subfamily A, Polypeptide 3); Oxygen Binding                    |
| P0454H12.12   | Putative 2,3-Bisphosphoglycerate-Independent     | At3g08590 | 2,3-Biphosphoglycerate-Independent Phosphoglycerate Mutase, Putative / Phosphoglyceromutase, Putative |
| P0454H12.13   | Unknown Protein                                  | At2g38630 | Unknown Protein                                                                                       |
| P0454H12.17   | Hypothetical Protein                             | At5g09950 | Pentatricopeptide (PPR) Repeat-Containing Protein                                                     |

|                |                                                    |           |                                                                                                                                   |
|----------------|----------------------------------------------------|-----------|-----------------------------------------------------------------------------------------------------------------------------------|
| P0454H12.21    | Hypothetical Protein                               | At1g06840 | Leucine-Rich Repeat Transmembrane Protein Kinase, Putative                                                                        |
| P0454H12.5     | Unknown Protein                                    | At4g10360 | Unknown Protein                                                                                                                   |
| P0455A11.11    | Putative Mrna Cap Methyltransferase                | At3g20650 | Mrna Capping Enzyme Family Protein                                                                                                |
| P0455A11.13    | SET Domain-Containing Protein-Like                 | At4g15180 | SET Domain-Containing Protein                                                                                                     |
| P0455C04.24    | Hypothetical Protein                               | At5g04850 | SNF7 Family Protein                                                                                                               |
| P0455C04.25    | Putative Peptide Transporter-Like Protein          | At5g13400 | Proton-Dependent Oligopeptide Transport (POT) Family Protein                                                                      |
| P0455C04.26    | Putative C-8,7 Sterol Isomerase                    | At1g20050 | Hyd1 (Hydra 1)                                                                                                                    |
| P0455H11.113   | Putative Rab GTP-Binding Protein Rab11a            | At5g47520 | Atraba5a (Arabidopsis Rab Gtpase Homolog A5a); GTP Binding                                                                        |
| P0455H11.115   | Ripening-Related Protein-Like                      | At5g59480 | Haloacid Dehalogenase-Like Hydrolase Family Protein                                                                               |
| P0455H11.118-1 | Putative Pectinacetyltransferase Precursor         | At1g57590 | Carboxylic Ester Hydrolase                                                                                                        |
| P0455H11.122   | Myb-Like DNA-Binding Protein-Like                  | At5g56110 | Atmyb103/Atmyb80 (Myb Domain Protein 103, Myb Domain Protein 80); DNA Binding / Transcription Factor                              |
| P0456A01.12    | Putative Cytochrome P450                           | At3g14680 | CYP72A14 (Cytochrome P450, Family 72, Subfamily A, Polypeptide 14); Oxygen Binding                                                |
| P0456A01.31    | Putative Trehalose-6-Phosphate Synthase            | At1g06410 | ATTPS7 (Arabidopsis Thaliana Trehalose-Phosphatase/Synthase 7); Transferase, Transferring Glycosyl Groups / Trehalose-Phosphatase |
| P0456A01.5     | Subtilisin-Like Protease                           | At5g45650 | Subtilase Family Protein                                                                                                          |
| P0456B03.101   | Putative Betaine-Aldehyde Dehydrogenase            | At3g48170 | ALDH10A9 (Aldehyde Dehydrogenase 10A9); 3-Chloroallyl Aldehyde Dehydrogenase                                                      |
| P0456B03.116   | Inositol Polyphosphate-5-Phosphatase-Like          | At2g01900 | Endonuclease/Exonuclease/Phosphatase Family Protein                                                                               |
| P0456F08.13    | Putative WD-Repeat Protein RBAP1                   | At2g19520 | Fve (Fve)                                                                                                                         |
| P0456F08.17    | Putative Lipase                                    | At2g42690 | Lipase, Putative                                                                                                                  |
| P0456F08.19    | Putative H <sup>+</sup> -Transporting ATP Synthase | At4g38510 | (VACUOLAR ATP SYNTHASE SUBUNIT B2); Hydrogen Ion Transporting ATP Synthase, Rotational Mechanism                                  |
| P0456F08.2     | Unknown Protein                                    | At2g26180 | IQD6 (IQ-Domain 6); Calmodulin Binding                                                                                            |
| P0456F08.24    | Putative Glycine Dehydrogenase                     | At2g26080 | Glycine Dehydrogenase (Decarboxylating), Putative / Glycine Decarboxylase, Putative / Glycine Cleavage System P-Protein, Putative |
| P0458A05.17    | Hypothetical Protein                               | At1g74160 | Unknown Protein                                                                                                                   |
| P0458A05.20    | Unknown Protein                                    | At3g59770 | SAC9 (Suppressor Of Actin 9)                                                                                                      |
| P0458B05.10    | ATP-Dependent Clp Protease ATP-Binding Subunit     | At5g51070 | ERD1 (EARLY RESPONSIVE TO DEHYDRATION 1); ATP Binding / Atpase                                                                    |
| P0458B05.20    | Putative DNA Repair Protein Rad8                   | At5g22750 | RAD5; ATP Binding / DNA Binding / Helicase/ Protein Binding / Zinc Ion Binding                                                    |
| P0458B05.4     | Unknown Protein                                    | At5g27730 | Hypothetical Protein                                                                                                              |
| P0458D06.46    | Unknown Protein                                    | At1g74530 | Unknown Protein                                                                                                                   |
| P0458E05.19    | Similar To 5-Oxoprolinase                          | At5g37830 | Hydantoinase/Oxoprolinase Family Protein                                                                                          |
| P0458E05.25    | Unknown Protein                                    | At3g11530 | Vacuolar Protein Sorting 55 Family Protein / VPS55 Family Protein                                                                 |
| P0458E05.28    | Unknown Protein                                    | At3g62840 | Unknown Protein                                                                                                                   |
| P0458E05.31    | Putative Rac Gtpase Activating Protein             | At5g22400 | Rac Gtpase Activating Protein, Putative                                                                                           |
| P0458E05.6     | Putative Chromosome Condensation Factor            | At1g76950 | Zinc Finger Protein (PRAF1) / Regulator Of Chromosome Condensation (RCC1) Family Protein                                          |
| P0458G06.122   | Leaf Senescence Related Protein-Like Protein       | At4g01080 | Unknown Protein                                                                                                                   |

|               |                                              |           |                                                                                                                       |
|---------------|----------------------------------------------|-----------|-----------------------------------------------------------------------------------------------------------------------|
| P0458H05.109  | Putative Serine/Threonine Kinase Protein     | At3g45860 | Receptor-Like Protein Kinase, Putative                                                                                |
| P0458H05.127  | Putative Serine/Threonine Kinase Protein     | At4g23140 | Crk6 (Cysteine-Rich Rik 6)                                                                                            |
| P0459B01.11   | Phosphoribulokinase Precursor                | At1g32060 | PRK (PHOSPHORIBULOKINASE); ATP Binding / Phosphoribulokinase/ Protein Binding                                         |
| P0459B01.28   | Putative 60S Ribosomal Protein L12           | At2g37190 | 60S Ribosomal Protein L12 (RPL12A)                                                                                    |
| P0459B01.29   | Putative DNA Topoisomerase II                | At3g23890 | TOPII (TOPOISOMERASE II); ATP Binding / DNA Binding / DNA Topoisomerase (ATP-Hydrolyzing)                             |
| P0459B01.30-2 | Unknown Protein                              | At1g47250 | PAF2 (20S Proteasome Alpha Subunit F2); Peptidase                                                                     |
| P0459B01.40   | Putative Amino Acid Transporter              | At1g31830 | Amino Acid Permease Family Protein                                                                                    |
| P0459B01.42-1 | Putative Serine/Threonine-Protein Kinase Mak | At4g10010 | Protein Kinase Family Protein                                                                                         |
| P0459B01.7    | 26S Proteasome Regulatory Subunit-Like       | At3g03060 | Atpase                                                                                                                |
| P0459B01.8    | Unknown Protein                              | At1g31940 | Unknown Protein                                                                                                       |
| P0459B04.13   | Putative Myb Factor Protein                  | At3g46130 | MYB111 (Myb Domain Protein 111)                                                                                       |
| P0459B04.17   | Putative Tonoplast Membrane Integral Protein | At4g01470 | GAMMA-TIP3/TIP1;3 (Tonoplast Intrinsic Protein 1;3); Water Channel                                                    |
| P0459B04.20   | Putative Legumin-Like Protein                | At2g28680 | Cupin Family Protein                                                                                                  |
| P0460C04.10   | Hypothetical Protein                         | At5g39980 | Pentatricopeptide (PPR) Repeat-Containing Protein                                                                     |
| P0460C04.11   | Hypothetical Protein                         | At3g55960 | NLI Interacting Factor (NIF) Family Protein                                                                           |
| P0460C04.21   | Putative Vacuolar Proton-Atpase Subunit 1    | At2g28520 | VHA-A1 (VACUOLAR PROTON ATPASE A 1); Atpase                                                                           |
| P0460C04.4    | Putative Calcium-Dependent Protein Kinase    | At1g74740 | CPK30 (Calcium-Dependent Protein Kinase 30); Calcium- And Calmodulin-Dependent Protein Kinase/ Kinase/ Protein Kinase |
| P0460E08.9    | Ospk7                                        | At4g18700 | CIPK12 (CIPK12); Kinase                                                                                               |
| P0460H02.14   | Hypothetical Protein                         | At3g26840 | Esterase/Lipase/Thioesterase Family Protein                                                                           |
| P0460H02.16   | Unknown Protein                              | At5g58920 | Unknown Protein                                                                                                       |
| P0460H02.3    | Hypothetical Protein                         | At2g27490 | ATCOAE; ATP Binding / Dephospho-Coa Kinase                                                                            |
| P0461A06.1    | Unknown Protein                              | At1g16860 | Merozoite Surface Protein-Related                                                                                     |
| P0461A06.15   | Putative Germin Protein Type 1               | At3g05950 | Germin-Like Protein, Putative                                                                                         |
| P0461A06.7    | Unknown Protein                              | At5g45100 | Protein Binding / Zinc Ion Binding                                                                                    |
| P0461B08.19   | Protein Kinase-Like                          | At2g45910 | Protein Kinase Family Protein / U-Box Domain-Containing Protein                                                       |
| P0461B08.25   | Aquaporin                                    | At4g23400 | PIP1;5/PIP1D (Plasma Membrane Intrinsic Protein 1;5); Water Channel                                                   |
| P0461B08.26   | Putative MAP3K Alpha 1 Protein Kinase        | At1g63700 | YDA (YODA); Kinase                                                                                                    |
| P0461B08.29   | Putative Cytochrome P450                     | At4g00360 | CYP86A2 (ABERRANT INDUCTION OF TYPE THREE GENES 1); Oxygen Binding                                                    |
| P0461B08.35   | Putative Uracil Transport Protein            | At5g03560 | Nucleobase:Cation Symporter                                                                                           |
| P0461B08.4-2  | Putative Tripeptidyl Peptidase II            | At4g20850 | TPP2 (TRIPEPTIDYL PEPTIDASE II); Subtilase                                                                            |
| P0461D06.12   | Putative High-Affinity Potassium Transporter | At2g30070 | ATKT1 (Arabidopsis Thaliana K+ Uptake 1); Potassium Ion Transporter                                                   |
| P0461D06.24-1 | ATP/GTP Binding Protein-Like                 | At5g10010 | Unknown Protein                                                                                                       |
| P0461D06.32   | Putative Elongation Factor 2                 | At1g56075 | Putative Elongation Factor                                                                                            |
| P0461D06.6    | Unknown Protein                              | At3g26670 | Unknown Protein                                                                                                       |

|                |                                                  |           |                                                                                                                                                 |
|----------------|--------------------------------------------------|-----------|-------------------------------------------------------------------------------------------------------------------------------------------------|
| P0461F06.19    | Putative Dioscorin Class A Precursor             | At1g08065 | Carbonate Dehydratase/ Zinc Ion Binding                                                                                                         |
| P0461F06.39    | Putative Zinc-Finger Protein                     | At5g22480 | Zinc Finger (ZPR1-Type) Family Protein                                                                                                          |
| P0462E11.12    | Putative (+)-Delta-Cadinene Synthase             | At3g14490 | Terpene Synthase/Cyclase Family Protein                                                                                                         |
| P0462E11.7     | Putative Ubiquinone Oxidoreductase Subunit 1     | At2g47910 | Crr6 (Chlororespiratory Reduction 6)                                                                                                            |
| P0462H08.25    | Unknown Protein                                  | At5g03430 | Phosphoadenosine Phosphosulfate (PAPS) Reductase Family Protein                                                                                 |
| P0462H08.5     | Unknown Protein                                  | At5g24860 | Fpf1 (Flowering Promoting Factor 1)                                                                                                             |
| P0463A02.18    | Putative NAD+ ADP-Ribosyltransferase             | At4g02390 | APP (ARABIDOPSIS POLY(ADP-RIBOSE) POLYMERASE); NAD+ ADP-Ribosyltransferase                                                                      |
| P0463A02.24    | Hypothetical Protein                             | At1g17010 | Oxidoreductase, 2OG-Fe(II) Oxygenase Family Protein                                                                                             |
| P0463G12.43-1  | Putative Aminopropyl Transferase                 | At5g53120 | Spds3 (Spermidine Synthase 3)                                                                                                                   |
| P0466H10.25    | Putative Pyrroline-5-Carboxylate Reductase       | At5g14800 | P5cr (Pyrroline-5- Carboxylate (P5c) Reductase)                                                                                                 |
| P0466H10.27    | Hypothetical Protein                             | At1g20780 | Armadillo/Beta-Catenin Repeat Protein-Related / U-Box Domain-Containing Protein                                                                 |
| P0466H10.3     | Putative Glucan Endo-1,3-Beta-D-Glucosidase      | At3g57260 | BGL2 (PATHOGENESIS-RELATED PROTEIN 2); Glucan 1,3-Beta-Glucosidase/ Hydrolase, Hydrolyzing O-Glycosyl Compounds                                 |
| P0467G09.22    | Putative Catechol O-Methyltransferase            | At4g35160 | O-Methyltransferase Family 2 Protein                                                                                                            |
| P0468B07.16    | Hypothetical Protein                             | At3g56840 | FAD-Dependent Oxidoreductase Family Protein                                                                                                     |
| P0468B07.17    | Hypothetical Protein                             | At3g60360 | EDA14/UTP11 (U3 SMALL NUCLEOLAR RNA-ASSOCIATED PROTEIN 11, Embryo Sac Development Arrest 14)                                                    |
| P0468B07.18    | Hypothetical Protein                             | At4g37510 | Ribonuclease III Family Protein                                                                                                                 |
| P0468B07.19    | Putative Calmodulin                              | At3g56800 | CAM3 (CALMODULIN 3); Calcium Ion Binding                                                                                                        |
| P0468B07.27    | Proteasome Subunit Alpha Type 3                  | At2g27020 | PAG1 (20S Proteasome Alpha Subunit G1); Peptidase                                                                                               |
| P0470A03.13-1  | Putative Protein Phosphatase-2C                  | At5g36250 | Protein Phosphatase 2C, Putative / PP2C, Putative                                                                                               |
| P0470A03.14    | Putative Ser/Thr Specific Protein Phosphatase 2A | At1g17720 | ATB BETA (Arabidopsis Thaliana Serine/Threonine Protein Phosphatase 2A 55 Kda Regulatory Subunit B Beta Isoform); Nucleotide Binding            |
| P0470A12.34    | Putative Peptide Transporter                     | At1g69870 | Proton-Dependent Oligopeptide Transport (POT) Family Protein                                                                                    |
| P0470A12.38    | Putative Rho GDP-Dissociation Inhibitor          | At3g07880 | Rho GDP-Dissociation Inhibitor Family Protein                                                                                                   |
| P0470A12.8     | Putative ABC Transporter                         | At1g70610 | ATTAP1 (Arabidopsis Thaliana Transporter Associated With Antigen Processing Protein 1); Atpase, Coupled To Transmembrane Movement Of Substances |
| P0470B03.25    | Nitrate Reductase Apoenzyme                      | At1g77760 | Nia1 (Nitrate Reductase 1)                                                                                                                      |
| P0470D12.102   | Selenium-Binding Protein-Like Protein            | At4g32430 | Pentatricopeptide (PPR) Repeat-Containing Protein                                                                                               |
| P0470D12.125   | Putative Stress-Related Protein                  | At3g05500 | Rubber Elongation Factor (REF) Family Protein                                                                                                   |
| P0470D12.138   | Putative TGF(Transforming Growth Factor) Beta    | At5g06360 | Ribosomal Protein S8e Family Protein                                                                                                            |
| P0470D12.142-1 | Universal Stress Protein USP1-Like Protein       | At2g47710 | Universal Stress Protein (USP) Family Protein                                                                                                   |
| P0470D12.145   | SKP1(S-Phase Kinase Associated Protein)          | At4g29370 | Kelch Repeat-Containing F-Box Family Protein                                                                                                    |
| P0470F10.1     | Putative Osnac7 Protein                          | At2g46770 | NST1 (NAC SECONDARY WALL THICKENING PROMOTING FACTOR1); Transcription Factor                                                                    |
| P0470F10.11    | Putative Acidic Ribosomal Protein P1a            | At1g01100 | 60S Acidic Ribosomal Protein P1 (RPP1A)                                                                                                         |
| P0470F10.14    | Putative Avr9 Elicitor Response Protein          | At1g32930 | Galactosyltransferase Family Protein                                                                                                            |
| P0470F10.18    | Putative 40S RIBOSOMAL PROTEIN S13               | At4g00100 | ATRPS13A (RIBOSOMAL PROTEIN S13A); Structural Constituent Of Ribosome                                                                           |



|               |                                              |           |                                                                                     |
|---------------|----------------------------------------------|-----------|-------------------------------------------------------------------------------------|
| P0470F10.20   | Putative Calmodulin                          | At1g12310 | Calmodulin, Putative                                                                |
| P0470G10.10   | Transcriptional Coactivator P15 (PC4) Family | At5g09250 | KIWI; DNA Binding / Transcription Coactivator                                       |
| P0470G10.17   | Putative Suppressor Of Actin 1               | At5g66020 | ATSAC1B/IBS2 (IMPAIRED IN BABA-INDUCED STERILITY 2); Phosphoinositide 5-Phosphatase |
| P0470G10.26   | Putative Purine Nucleotide Binding Protein   | At5g22370 | EMB1705 (EMBRYO DEFECTIVE 1705); ATP Binding                                        |
| P0470G10.35   | Putative DNA J Domain Protein                | At1g76700 | DNAJ Heat Shock N-Terminal Domain-Containing Protein                                |
| P0471A11.10   | Putative Phi-1                               | At1g35140 | Phi-1 (Phosphate-Induced 1)                                                         |
| P0471A11.31-1 | Putative Poly(A) Binding Protein             | At5g10350 | Polyadenylate-Binding Protein Family Protein / PABP Family Protein                  |
| P0471A11.34   | LMBR1 Integral Membrane Protein-Like         | At5g65290 | LMBR1 Integral Membrane Family Protein                                              |
| P0471A11.43   | Unknown Protein                              | At1g72210 | Basic Helix-Loop-Helix (Bhlh) Family Protein (Bhlh096)                              |
| P0471A11.50   | Pentatricopeptide (PPR) Repeat-Containing    | At1g73400 | Pentatricopeptide (PPR) Repeat-Containing Protein                                   |
| P0471B04.12   | Putative Receptor Protein Kinase             | At1g72180 | Leucine-Rich Repeat Transmembrane Protein Kinase, Putative                          |
| P0471B04.13   | Putative Amino Acid Permease 6               | At1g10010 | AAP8 (Amino Acid Permease 8); Amino Acid Permease                                   |
| P0471B04.18   | Hypothetical Protein                         | At4g15090 | FAR1 (FAR-RED IMPAIRED RESPONSE 1); Zinc Ion Binding                                |
| P0471B04.23   | Hypothetical Protein                         | At5g67540 | Glycosyl Hydrolase Family Protein 43                                                |
| P0471B04.4    | Hypothetical Protein                         | At5g49880 | Mitotic Checkpoint Family Protein                                                   |
| P0471B04.5    | Putative Elicitor Response Protein           | At1g33430 | Galactosyltransferase Family Protein                                                |
| P0472F10.2    | Putative Serine Decarboxylase                | At1g43710 | EMB1075 (EMBRYO DEFECTIVE 1075); Carboxy-Lyase                                      |
| P0472F10.24   | Putative WD Repeat Domain 5B                 | At5g64730 | Transducin Family Protein / WD-40 Repeat Family Protein                             |
| P0473D02.16   | Putative NADH Dehydrogenase                  | At4g05020 | NDB2 (NAD(P)H DEHYDROGENASE B2); Disulfide Oxidoreductase                           |
| P0473D02.40-1 | N-Acetylglucosaminyltransferase-Like Protein | At1g03520 | Glycosyltransferase Family 14 Protein / Core-2/I-Branching Enzyme Family Protein    |
| P0473F05.0-3  | Disease Resistance Protein RPM1-Like         | At3g46710 | Disease Resistance Protein (CC-NBS-LRR Class), Putative                             |
| P0473H02.4    | Putative Glycoprotease                       | At4g22720 | Glycoprotease M22 Family Protein                                                    |
| P0473H02.6    | Putative                                     | At4g32840 | Phosphofructokinase Family Protein                                                  |
| P0474F07.6    | Ripening-Related Protein-Like                | At4g12390 | Invertase/Pectin Methyltransferase Inhibitor Family Protein                         |
| P0474F11.12   | Kinesin Light Chain-Like                     | At2g31240 | Tetratricopeptide Repeat (TPR)-Containing Protein                                   |
| P0474F11.13   | Putative Anthocyanin Acyltransferase         | At3g29635 | Transferase Family Protein                                                          |
| P0474F11.25-1 | Putative Fibrillarin                         | At4g25630 | Fib2 (Fibrillarin 2)                                                                |
| P0474F11.3    | Putative Protein Serine/Threonine Kinase     | At3g09830 | Protein Kinase, Putative                                                            |
| P0474F11.34-1 | Putative Ubiquitin C-Terminal Hydrolase      | At1g65650 | Ubiquitin Carboxyl-Terminal Hydrolase Family 1 Protein                              |
| P0474F11.8    | Protein Phosphatase                          | At2g39840 | TOPP4 (Type One Serine/Threonine Protein Phosphatase 4); Protein Phosphatase Type 1 |
| P0475C12.28   | Unknown Protein                              | At3g44830 | Lecithin:Cholesterol Acyltransferase Family Protein / LACT Family Protein           |
| P0475E07.126  | Putative Phosphoglucomutase Precursor,       | At5g17530 | Phosphoglucomutase Family Protein                                                   |
| P0475F05.14-1 | Unknown Protein                              | At3g52920 | Unknown Protein                                                                     |
| P0475F05.16   | Branching Enzyme-3 Precursor                 | At5g03650 | Sbe2.2 (Starch Branching Enzyme 2.2)                                                |

|               |                                                 |           |                                                                                                                                   |
|---------------|-------------------------------------------------|-----------|-----------------------------------------------------------------------------------------------------------------------------------|
| P0475F05.7    | Putative CTR1-Like Protein Kinase               | At5g03730 | CTR1 (CONSTITUTIVE TRIPLE RESPONSE 1); Kinase                                                                                     |
| P0475H04.11   | Unknown Protein                                 | At1g10320 | U2 Snrnp Auxiliary Factor-Related                                                                                                 |
| P0476C12.12   | Putative 26S Proteasome Regulatory Particle     | At5g58290 | RPT3 (Root Phototropism 3); Atpase                                                                                                |
| P0476C12.36   | C2 Domain-Containing Protein-Like               | At3g17980 | C2 Domain-Containing Protein                                                                                                      |
| P0476H10.11   | PDR-Like ABC Transporter                        | At3g53480 | ATPDR9/PDR9 (PLEIOTROPIC DRUG RESISTANCE 9); Atpase, Coupled To Transmembrane Movement Of Substances                              |
| P0476H10.22   | Putative SNAP25                                 | At1g13890 | SNAP30 (Synaptosomal-Associated Protein 30)                                                                                       |
| P0476H10.24   | Putative Galactomannan Galactosyltransferase    | At5g07720 | Galactosyl Transferase GMA12/MNN10 Family Protein                                                                                 |
| P0476H10.25   | Putative 60S Acidic Ribosomal Protein P2A       | At3g44590 | 60S Acidic Ribosomal Protein P2 (RPP2D)                                                                                           |
| P0476H10.42   | Putative Seed Maturation Protein                | At5g22470 | NAD+ ADP-Ribosyltransferase                                                                                                       |
| P0477A12.39   | Unknown Protein                                 | At5g60930 | Chromosome-Associated Kinesin, Putative                                                                                           |
| P0477A12.6    | Putative Ubiquitin / Ribosomal Protein CEP52    | At3g52590 | UBQ1 (EARLY-RESPONSIVE TO DEHYDRATION 16, UBIQUITIN EXTENSION PROTEIN 1); Protein Binding                                         |
| P0477B05.11   | Putative Nicotianamine Aminotransferase A       | At5g36160 | Aminotransferase-Related                                                                                                          |
| P0477F03.101  | Unknown Protein                                 | At5g23040 | CDF1 (CELL GROWTH DEFECT FACTOR 1); Heat Shock Protein Binding                                                                    |
| P0477F03.105  | Putative 2-Oxoglutarate-Dependent Dioxygenase   | At1g52820 | 2-Oxoglutarate-Dependent Dioxygenase, Putative                                                                                    |
| P0478E02.11   | Unknown Protein                                 | At5g66090 | Unknown Protein                                                                                                                   |
| P0478F09.14   | Putative Extensin                               | At3g24480 | Leucine-Rich Repeat Family Protein / Extensin Family Protein                                                                      |
| P0478H03.1    | Unknown Protein                                 | At5g49540 | Unknown Protein                                                                                                                   |
| P0478H03.16   | Unknown Protein                                 | At1g15160 | MATE Efflux Family Protein                                                                                                        |
| P0479C12.25-1 | Putative Trehalose-6-Phosphate Synthase         | At1g23870 | ATTPS9 (Arabidopsis Thaliana Trehalose-Phosphatase/Synthase 9); Transferase, Transferring Glycosyl Groups / Trehalose-Phosphatase |
| P0479C12.38   | Putative Receptor-Like Protein Kinase           | At1g73080 | PEPR1 (PEP1 RECEPTOR 1); ATP Binding / Kinase/ Protein Binding / Protein Serine/Threonine Kinase                                  |
| P0479D12.11   | MAP Kinase MAPK2                                | At1g10210 | ATMPK1 (MITOGEN-ACTIVATED PROTEIN KINASE 1); MAP Kinase/ Kinase                                                                   |
| P0479D12.34   | Exocyst Subunit EXO70-Like Protein              | At4g31540 | ATEXO70G1 (Exocyst Subunit EXO70 Family Protein G1); Protein Binding                                                              |
| P0480C01.20   | Putative PGPD14 Protein (Pollen Germination     | At5g22920 | Zinc Finger (C3HC4-Type RING Finger) Family Protein                                                                               |
| P0480C01.27   | Putative MRP Protein (ATP/GTP-Binding Protein)  | At3g24430 | HCF101 (HIGH-CHLOROPHYLL-FLUORESCENCE 101); ATP Binding                                                                           |
| P0480E02.11   | Nucleoid DNA-Binding Protein Cnd41-Like Protein | At3g18490 | Aspartyl Protease Family Protein                                                                                                  |
| P0481E12.1    | Putative (1-4)-Beta-Mannan Endohydrolase        | At4g28320 | Glycosyl Hydrolase Family 5 Protein / Cellulase Family Protein                                                                    |
| P0481E12.10   | Putative Dihydroorotase                         | At4g22930 | PYR4 (DIHYDROOROTASE, PYRIMIDIN 4, Dihydroorotase); Dihydroorotase                                                                |
| P0481E12.26   | Unknown Protein                                 | At1g29690 | CAD1 (CONSTITUTIVELY ACTIVATED CELL DEATH 1); Oxidoreductase                                                                      |
| P0481E12.28   | Hypothetical Protein                            | At5g45690 | Unknown Protein                                                                                                                   |
| P0481E12.30   | Hypothetical Protein                            | At5g42660 | Hypothetical Protein                                                                                                              |
| P0481E12.31   | Putative Ribosomal Protein L13                  | At1g78630 | EMB1473 (EMBRYO DEFECTIVE 1473); Structural Constituent Of Ribosome                                                               |
| P0481F05.16   | Putative Potential Copper-Transporting Atpase   | At4g33520 | PAA1 (Metal-Transporting P-Type Atpase 1)                                                                                         |
| P0482C06.15   | Putative Prolyl Endopeptidase                   | At1g76140 | Prolyl Oligopeptidase                                                                                                             |

|               |                                                 |           |                                                                                                                           |
|---------------|-------------------------------------------------|-----------|---------------------------------------------------------------------------------------------------------------------------|
| P0482C06.2    | 1-Deoxy-D-Xylulose-5-Phosphate Reductoisomerase | At5g62790 | Dxr (1-Deoxy-D-Xylulose 5-Phosphate Reductoisomerase)                                                                     |
| P0482C06.5    | Putative Protein Kinase                         | At1g62400 | HT1 (HIGH LEAF TEMPERATURE 1); Kinase/ Protein Threonine/Tyrosine Kinase                                                  |
| P0482D04.13   | Unknown Protein                                 | At5g15790 | Zinc Finger (C3HC4-Type RING Finger) Family Protein                                                                       |
| P0482D04.17   | Unknown Protein                                 | At1g27440 | GUT2; Catalytic                                                                                                           |
| P0482D04.4    | Enoyl Coa Hydratase-Like Protein                | At5g43280 | Atdci1 (Delta(3,5),Delta(2,4)-Dienoyl-Coa Isomerase 1)                                                                    |
| P0482D04.5    | Hypothetical Protein                            | At5g41060 | Zinc Ion Binding                                                                                                          |
| P0482D04.9    | Putative Ubiquitin Conjugating Enzyme           | At5g50870 | UBC27 (Ubiquitin-Conjugating Enzyme 26); Ubiquitin-Protein Ligase                                                         |
| P0482F12.1-1  | Bax Inhibitor-1 (BI-1) (Osbi-1)                 | At5g47120 | Atbi-1 (Arabidopsis Bax Inhibitor 1)                                                                                      |
| P0482F12.19   | Putative 28 Kda Golgi SNARE Protein             | At2g45200 | GOS12 (GOLGI SNARE 12); SNARE Binding                                                                                     |
| P0482F12.21-1 | Putative TPR Repeat Containing Protein          | At3g04830 | Binding                                                                                                                   |
| P0482F12.5    | Putative Alkaline/Neutral Invertase             | At4g34860 | Beta-Fructofuranosidase                                                                                                   |
| P0483C08.42   | Putative 40S Ribosomal Protein S8               | At5g20290 | 40S Ribosomal Protein S8 (RPS8A)                                                                                          |
| P0483C08.45   | Putative O-Linked N-Acetyl Glucosamine          | At3g04240 | SEC (SECRET AGENT); Transferase, Transferring Glycosyl Groups                                                             |
| P0483D07.1    | 'Unknown Protein, WD Domain, G-Beta Repeat,     | At1g15440 | Transducin Family Protein / WD-40 Repeat Family Protein                                                                   |
| P0483D07.18   | 'Unknown Protein, Contains Histidine-Containing | At3g16360 | AHP4 (HPT PHOSPHOTRANSMITTER 4); Histidine Phosphotransfer Kinase/ Transferase, Transferring Phosphorus-Containing Groups |
| P0483D07.2    | 'Unknown Protein, Similar To DJ-1/Pfpi Family,  | At1g53280 | DJ-1 Family Protein                                                                                                       |
| P0483D07.3    | Putative Heat Shock Protein HSP101              | At1g74310 | ATHSP101 (HEAT SHOCK PROTEIN 101); ATP Binding / Atpase                                                                   |
| P0483D07.5    | Putative Oligosaccharyl Transferase STT3        | At5g19690 | STT3A (STAUROSPORIN AND TEMPERATURE SENSITIVE 3-LIKE A); Oligosaccharyl Transferase                                       |
| P0483D07.6    | Unknown Protein                                 | At3g03010 | Unknown Protein                                                                                                           |
| P0483E06.129  | Putative Phosphoglycerate Dehydrogenase         | At1g72190 | Oxidoreductase Family Protein                                                                                             |
| P0483G10.1    | Unknown Protein                                 | At3g01650 | Copine-Related                                                                                                            |
| P0483G10.13   | Unknown Protein                                 | At5g11870 | Unknown Protein                                                                                                           |
| P0483G10.17   | Putative Peroxidase                             | At1g71695 | Peroxidase 12 (PER12) (P12) (PRXR6)                                                                                       |
| P0483G10.3    | Putative Nitrate Transporter                    | At3g45680 | Proton-Dependent Oligopeptide Transport (POT) Family Protein                                                              |
| P0485B12.35   | Alpha-Expansin                                  | At1g69530 | Atexpa1 (Arabidopsis Thaliana Expansin A1)                                                                                |
| P0485G01.13   | Ubiquitin-Conjugating Enzyme E2                 | At1g16890 | UBC36; Ubiquitin-Protein Ligase                                                                                           |
| P0485G01.25   | Unknown Protein                                 | At4g13240 | ATROPGEF9/ROPGEF9 (KINASE PARTNER PROTEIN-LIKE); Rho Guanyl-Nucleotide Exchange Factor                                    |
| P0485G01.26   | Peroxiredoxin                                   | At1g65970 | TPX2 (THIOREDOXIN-DEPENDENT PEROXIDASE 2); Antioxidant                                                                    |
| P0486F07.29   | Putative Equilibrative Nucleoside Transporter   | At1g70330 | ENT1,AT (EQUILIBRATIVE NUCLEOTIDE TRANSPORTER 1); Nucleoside Transporter                                                  |
| P0486F07.35   | Putative Copper Chaperone                       | At5g02600 | Heavy-Metal-Associated Domain-Containing Protein                                                                          |
| P0486F07.4    | Putative Integral Membrane Protein              | At5g19980 | Integral Membrane Family Protein                                                                                          |
| P0486G03.16   | N-Type ATP Pyrophosphatase-Like                 | At2g44270 | Unknown Protein                                                                                                           |
| P0486G03.2    | Putative Peptidylprolyl Isomerase D             | At2g15790 | Sqn (Squint)                                                                                                              |

|               |                                                |           |                                                                                                          |
|---------------|------------------------------------------------|-----------|----------------------------------------------------------------------------------------------------------|
| P0486G03.3    | Armadillo/Beta-Catenin Repeat Protein-Like     | At4g33940 | Zinc Finger (C3HC4-Type RING Finger) Family Protein                                                      |
| P0486G03.5    | Zinc Metalloproteinase-Like                    | At1g49630 | ATPREP2; Metalloendopeptidase                                                                            |
| P0486G03.7    | Unknown Protein                                | At4g33380 | Unknown Protein                                                                                          |
| P0487D09.13   | Ankyrin-Like Protein                           | At2g01680 | Ankyrin Repeat Family Protein                                                                            |
| P0487D09.19   | Putative Myosin II Heavy Chain                 | At1g68060 | ATMAP70-1 (MICROTUBULE-ASSOCIATED PROTEINS 70-1); Microtubule Binding                                    |
| P0487D09.22   | Putative Dihydropyrimidine Dehydrogenase       | At3g17810 | Dihydroorotate Dehydrogenase Family Protein / Dihydroorotate Oxidase Family Protein                      |
| P0487D09.5    | Erwinia Induced Protein 2                      | At5g17190 | Unknown Protein                                                                                          |
| P0487D09.7    | Putative Zn-Dependent Protease With Chaperone  | At5g51740 | Peptidase M48 Family Protein                                                                             |
| P0487D09.8    | Glutamine Synthetase Shoot Isozyme             | At5g37600 | ATGSR1 (Arabidopsis Thaliana Glutamine Synthase Clone R1); Glutamate-Ammonia Ligase                      |
| P0487E11.17   | Putative GTP-Binding Protein                   | At4g02080 | ASAR1 (Arabidopsis Thaliana Secretion-Associated RAS Super Family 2); GTP Binding                        |
| P0487H02.5    | Putative Mtn21                                 | At1g09380 | Integral Membrane Family Protein / Nodulin Mtn21-Related                                                 |
| P0487H05.14   | Putative Riboflavin Biosynthesis Protein Ribd  | At3g47390 | Cytidine/Deoxycytidylate Deaminase Family Protein                                                        |
| P0487H05.16-2 | Nucellin-Like Aspartic Protease-Like           | At1g05840 | Aspartyl Protease Family Protein                                                                         |
| P0487H05.39   | Putative Importin 7<Ran-Binding Protein 7      | At2g31660 | SAD2 (SUPER SENSITIVE TO ABA AND DROUGHT2); Protein Transporter                                          |
| P0488B06.38-1 | Unknown Protein                                | At1g15080 | ATPAP2 (PHOSPHATIDIC ACID PHOSPHATASE 2); Phosphatidate Phosphatase                                      |
| P0489A01.10   | Hypothetical Protein                           | At4g18010 | IP5PII (INOSITOL POLYPHOSPHATE 5-PHOSPHATASE II); Inositol-Polyphosphate 5-Phosphatase                   |
| P0489A01.13   | Putative Cytochrome P450                       | At2g21910 | CYP96A5 (Cytochrome P450, Family 96, Subfamily A, Polypeptide 5); Oxygen Binding                         |
| P0489A01.17   | Hypothetical Protein                           | At1g65710 | Unknown Protein                                                                                          |
| P0489A01.9    | Hypothetical Protein                           | At3g10530 | Transducin Family Protein / WD-40 Repeat Family Protein                                                  |
| P0489A05.24   | Putative Major Intrinsic Protein               | At4g18910 | NIP1;2/NLM2 (NOD26-Like Intrinsic Protein 1;2); Water Channel                                            |
| P0489A05.5    | Putative MADS-Box Protein                      | At2g42830 | SHP2 (SHATTERPROOF 2); Transcription Factor                                                              |
| P0489B03.15   | Putative 60S Ribosomal Protein                 | At1g08360 | 60S Ribosomal Protein L10A (RPL10aA)                                                                     |
| P0489G09.22   | Putative Endo-Beta-1,4-Glucanase               | At1g64390 | Endo-1,4-Beta-Glucanase, Putative / Cellulase, Putative                                                  |
| P0491E01.9    | Cyclin-Like                                    | At3g21870 | CYCP2;1 (Cyclin P2;1); Cyclin-Dependent Protein Kinase                                                   |
| P0491F11.12   | Putative 5-3 Exoribonuclease                   | At5g42540 | XRN2 (EXORIBONUCLEASE 2); 5'-3' Exonuclease/ Nucleic Acid Binding                                        |
| P0491F11.13   | Putative 3-Phosphoinositide-Dependent Protein  | At3g10540 | 3-Phosphoinositide-Dependent Protein Kinase, Putative                                                    |
| P0491F11.16   | Putative Amidophosphoribosyltransferase        | At4g34740 | ATASE2/ATD2 (GLN PHOSPHORIBOSYL PYROPHOSPHATE AMIDOTRANSFERASE 2); Amidophosphoribosyltransferase        |
| P0491F11.2    | Hypothetical Protein                           | At1g72140 | Proton-Dependent Oligopeptide Transport (POT) Family Protein                                             |
| P0492E07.108  | Spermidine Synthase 1                          | At1g23820 | Spds1 (Spermidine Synthase 1)                                                                            |
| P0492E07.115  | Putative CLB1 Protein (Calcium-Dependent Lipid | At3g61050 | Lipid Binding                                                                                            |
| P0492E07.120  | UIP2-Like Protein                              | At5g42190 | ASK2 (ARABIDOPSIS SKP1-LIKE 2); Ubiquitin-Protein Ligase                                                 |
| P0492E07.128  | Unknown Protein                                | At3g13930 | Dihydrolipoamide S-Acetyltransferase, Putative                                                           |
| P0492F05.14   | 3-Methyl-2-Oxobutanoate                        | At2g46110 | KPHMT1/PANB1 (KETOPANTOATE HYDROXYMETHYLTRANSFERASE 1); 3-Methyl-2-Oxobutanoate Hydroxymethyltransferase |

|               |                                               |           |                                                                                                                |
|---------------|-----------------------------------------------|-----------|----------------------------------------------------------------------------------------------------------------|
| P0492F05.17   | Putative Late Embryogenesis Abundant Protein  | At1g01470 | Lea14 (Late Embryogenesis Abundant 14)                                                                         |
| P0492F05.28   | Hypothetical Protein                          | At4g12550 | AIR1 (Auxin-Induced In Root Cultures 1); Lipid Binding                                                         |
| P0492F05.5    | Dimethylaniline Monooxygenase-Like Protein    | At5g25620 | YUC6 (YUCCA6); Monooxygenase                                                                                   |
| P0492G09.17   | Putative Ethylene-Forming Enzyme              | At3g21420 | Oxidoreductase, 2OG-Fe(II) Oxygenase Family Protein                                                            |
| P0492G09.19   | Putative HAK2 (K <sup>+</sup> Transporter)    | At3g02050 | KUP3 (K <sup>+</sup> Uptake Permease 3); Potassium Ion Transporter                                             |
| P0492G09.21   | Putative Cytochrome C1 Precursor              | At5g40810 | Cytochrome C1, Putative                                                                                        |
| P0492G09.25   | Putative Serine/Threonine Kinase PBS1 Protein | At5g18610 | Protein Kinase Family Protein                                                                                  |
| P0492G09.26   | Unknown Protein                               | At5g18630 | Lipase Class 3 Family Protein                                                                                  |
| P0492G09.7    | Pir7b Protein (Pseudomonas Inducible Protein) | At2g23600 | ACL (ACETONE-CYANOHYDRIN LYASE); Hydrolase                                                                     |
| P0493A04.32   | Unknown Protein                               | At1g02180 | Ferredoxin-Related                                                                                             |
| P0493A04.9    | Plastid (P)Pppp Synthase                      | At3g14050 | RSH2 (RELA-SPOT HOMOLOG); Catalytic                                                                            |
| P0494A10.15   | Putative Fructose-Bisphosphate Aldolase       | At2g01140 | Fructose-Bisphosphate Aldolase, Putative                                                                       |
| P0494A10.16   | Putative ATP-Dependent RNA Helicase A         | At1g48650 | Helicase Domain-Containing Protein                                                                             |
| P0494D11.1    | Putative 3-Glucanase                          | At4g31140 | Glycosyl Hydrolase Family 17 Protein                                                                           |
| P0494D11.3    | Putative Proteasome 26S Non-Atpase Subunit 1  | At2g32730 | 26S Proteasome Regulatory Subunit, Putative                                                                    |
| P0494D11.7    | Putative Phosphoethanolamine                  | At2g38670 | PECT1 (PHOSPHORYLETHANOLAMINE CYTIDYLYLTRANSFERASE 1); Ethanolamine-Phosphate Cytidylyltransferase             |
| P0495C02.18   | Putative Peroxisomal Membrane Protein 22 Kda  | At4g04470 | PMP22 (Peroxisomal Membrane Protein 22)                                                                        |
| P0495H05.17   | Hypothetical Protein                          | At1g58060 | Helicase Domain-Containing Protein                                                                             |
| P0495H05.31   | Hypothetical Protein                          | At1g12720 | Mutator-Like Transposase Family                                                                                |
| P0495H05.61   | Putative UDP-Glucose 4-Epimerase              | At1g30620 | Mur4 (Murus 4)                                                                                                 |
| P0496C02.103  | Unknown Protein                               | At4g21770 | Pseudouridine Synthase Family Protein                                                                          |
| P0496D04.15   | Putative DNA-Directed RNA Polymerase II 13.6K | At3g52090 | ATRPB13.6 (Arabidopsis Thaliana RNA Polymerase II 13.6 Kda Subunit); DNA Binding / DNA-Directed RNA Polymerase |
| P0496D04.20-1 | Putative Integral Membrane Protein            | At2g32040 | Integral Membrane Transporter Family Protein                                                                   |
| P0496D04.21   | Hypothetical Protein                          | At4g14830 | Unknown Protein                                                                                                |
| P0496E03.28   | Putative Protein Kinase Xa21 D, Receptor Type | At3g47570 | Leucine-Rich Repeat Transmembrane Protein Kinase, Putative                                                     |
| P0496E03.6    | Putative Ankyrin-Kinase                       | At1g14000 | Protein Kinase Family Protein / Ankyrin Repeat Family Protein                                                  |
| P0496E03.9    | Putative Acetolactate Synthase Small Subunit  | At2g31810 | Acetolactate Synthase Small Subunit, Putative                                                                  |
| P0496H05.17   | Putative Cyt-P450 Monooxygenase               | At2g45550 | CYP76C4 (Cytochrome P450, Family 76, Subfamily C, Polypeptide 4); Oxygen Binding                               |
| P0496H05.25   | Putative Peptidylprolyl Isomerase             | At5g48570 | Peptidyl-Prolyl Cis-Trans Isomerase, Putative / FK506-Binding Protein, Putative                                |
| P0497A05.15   | Unknown Protein                               | At1g05690 | BT3 (BTB And TAZ Domain Protein 3); Protein Binding / Transcription Regulator                                  |
| P0497A05.18   | Proline Transport Protein-Like                | At2g39890 | Prot1 (PROLINE TRANSPORTER 1)                                                                                  |
| P0498E12.107  | Putative Reticuline Oxidase Precursor         | At5g44400 | FAD-Binding Domain-Containing Protein                                                                          |
| P0498H04.1    | Putative Bile Acid Beta-Glucosidase           | At1g33700 | Unknown Protein                                                                                                |
| P0498H04.19   | Putative AER                                  | At5g67150 | Transferase Family Protein                                                                                     |

|               |                                                               |           |                                                                                                          |
|---------------|---------------------------------------------------------------|-----------|----------------------------------------------------------------------------------------------------------|
| P0498H04.25   | Unknown Protein                                               | At1g08480 | Unknown Protein                                                                                          |
| P0498H04.26   | Putative GDSL-Motif Lipase/Hydrolase Protein                  | At1g29670 | GDSL-Motif Lipase/Hydrolase Family Protein                                                               |
| P0498H04.27   | Putative Peroxidase 47 Precursor                              | At4g33420 | Peroxidase, Putative                                                                                     |
| P0498H04.29   | Putative Fructokinase                                         | At4g10260 | Pfkb-Type Carbohydrate Kinase Family Protein                                                             |
| P0499G10.13-2 | GEKO1-Like Protein                                            | At2g03800 | Gek1 (Geko1)                                                                                             |
| P0499G10.22   | Putative ABI3-Interacting Protein 2                           | At3g22440 | Hydroxyproline-Rich Glycoprotein Family Protein                                                          |
| P0501E09.27   | Putative UNC50                                                | At2g15240 | UNC-50 Family Protein                                                                                    |
| P0501E09.36-2 | Putative Na <sup>+</sup> /H <sup>+</sup> Antiporter Precursor | At3g19490 | ATNHD1 (Arabidopsis Thaliana Na/H Antiporter 1); Sodium:Hydrogen Antiporter                              |
| P0501G01.15   | Hypothetical Protein                                          | At5g24030 | C4-Dicarboxylate Transporter/Malic Acid Transport Family Protein                                         |
| P0501G01.21   | Putative Endopolygalacturonase                                | At3g59850 | Polygalacturonase, Putative / Pectinase, Putative                                                        |
| P0501G01.24   | Hypothetical Protein                                          | At1g07380 | Ceramidase Family Protein                                                                                |
| P0501G01.6    | Hypothetical Protein                                          | At4g01210 | Glycosyltransferase Family Protein 1                                                                     |
| P0501G01.7    | Putative Uroporphyrinogen Decarboxylase                       | At3g14930 | HEME1; Uroporphyrinogen Decarboxylase                                                                    |
| P0501G04.11   | Putative Pentatricopeptide (PPR)                              | At2g37230 | Pentatricopeptide (PPR) Repeat-Containing Protein                                                        |
| P0501G04.26   | Putative Wall-Associated Kinase                               | At1g21270 | WAK2 (Wall-Associated Kinase 2); Protein Serine/Threonine Kinase                                         |
| P0501G04.29   | Putative CLAVATA1 Receptor Kinase                             | At4g28650 | Leucine-Rich Repeat Transmembrane Protein Kinase, Putative                                               |
| P0501G04.4    | Kinesin Light Chain-Like Protein                              | At4g10840 | Kinesin Light Chain-Related                                                                              |
| P0501G04.9    | Hydroperoxide Lyase                                           | At4g15440 | HPL1 (HYDROPEROXIDE LYASE 1); Heme Binding / Iron Ion Binding / Monooxygenase                            |
| P0503B05.26   | Putative Hydroquinone Glucosyltransferase                     | At4g01070 | UDP-Glucuronosyl/UDP-Glucosyl Transferase Family Protein                                                 |
| P0503C12.1    | Putative Oxidoreductase-Like Protein                          | At3g15090 | Oxidoreductase, Zinc-Binding Dehydrogenase Family Protein                                                |
| P0503D09.101  | Unknown Protein                                               | At5g46090 | Unknown Protein                                                                                          |
| P0503E05.6    | Putative Hydroxyethylthiazole Kinase                          | At3g24030 | Hydroxyethylthiazole Kinase Family Protein                                                               |
| P0504A05.1    | Unknown Protein                                               | At4g29850 | Unknown Protein                                                                                          |
| P0504A05.24   | Putative 4-Coumarate Coenzyme A Ligase                        | At1g51680 | 4cl1 (4-Coumarate:Coa Ligase 1)                                                                          |
| P0504A05.25   | Integral Membrane Protein-Like                                | At2g35760 | Integral Membrane Family Protein                                                                         |
| P0504A05.26   | Putative Calmodulin-Binding Protein                           | At4g25800 | Calmodulin-Binding Protein                                                                               |
| P0504D03.19   | Unknown Protein                                               | At1g51160 | Synbindin, Putative                                                                                      |
| P0504D03.20   | Unknown Protein                                               | At3g23620 | Brix Domain-Containing Protein                                                                           |
| P0504D03.3    | Putative ARG1 Protein (Altered Response To Gravity)           | At1g68370 | Arg1 (Altered Response To Gravity 1)                                                                     |
| P0504E02.19   | Photosystem II Protein W-Like Protein                         | At4g28660 | Photosystem II Reaction Centre W (Psbw) Family Protein                                                   |
| P0504E02.20   | Putative Ribonucleoprotein                                    | At4g03110 | RNA-Binding Protein, Putative                                                                            |
| P0504E02.27   | Putative Type IIB Calcium Atpase                              | At3g57330 | Calcium-Transporting Atpase, Plasma Membrane-Type, Putative / Ca <sup>2+</sup> -Atpase, Putative (ACA11) |
| P0504E02.3    | Putative Dermal Glycoprotein Precursor                        | At1g03230 | Extracellular Dermal Glycoprotein, Putative / EDGP, Putative                                             |
| P0505D12.20   | Putative Histone H3                                           | At5g65360 | Histone H3                                                                                               |

|              |                                               |           |                                                                                                                                                                                          |
|--------------|-----------------------------------------------|-----------|------------------------------------------------------------------------------------------------------------------------------------------------------------------------------------------|
| P0505D12.22  | Fructose-1,6-Bisphosphatase                   | At1g43670 | Fructose-1,6-Bisphosphatase, Putative / D-Fructose-1,6-Bisphosphate 1-Phosphohydrolase, Putative / Fbpase, Putative                                                                      |
| P0505D12.23  | Hypothetical Protein                          | At1g01050 | Inorganic Pyrophosphatase, Putative (Soluble) / Pyrophosphate Phospho-Hydrolase, Putative / Ppase, Putative                                                                              |
| P0505D12.6   | Putative Uricase                              | At2g26230 | Uricase / Urate Oxidase / Nodulin 35, Putative                                                                                                                                           |
| P0505H05.2   | Putative Cysteine Proteinase                  | At2g27420 | Cysteine Proteinase, Putative                                                                                                                                                            |
| P0506A10.22  | Hypothetical Protein                          | At2g45750 | Dehydration-Responsive Family Protein                                                                                                                                                    |
| P0506B12.12  | Putative Respiratory Burst Oxidase Protein    | At5g60010 | Ferric Reductase-Like Transmembrane Component Family Protein                                                                                                                             |
| P0506B12.16  | Putative Histone H4                           | At5g59970 | Histone H4                                                                                                                                                                               |
| P0506B12.20  | Putative ABC Transporter-Like Protein         | At3g55090 | ABC Transporter Family Protein                                                                                                                                                           |
| P0506B12.23  | Unknown Protein                               | At5g18520 | Unknown Protein                                                                                                                                                                          |
| P0506B12.26  | Unknown Protein                               | At3g12360 | Ankyrin Repeat Family Protein                                                                                                                                                            |
| P0506B12.36  | 40S Ribosomal Protein                         | At5g02960 | 40S Ribosomal Protein S23 (RPS23B)                                                                                                                                                       |
| P0506B12.4   | Putative CAAT-Box DNA Binding Protein         | At4g14540 | CCAAT-Box Binding Transcription Factor Subunit B (NF-YB) (HAP3 ) (AHAP3) Family                                                                                                          |
| P0506C07.14  | Putative Disease Resistance Protein RPR1      | At1g58410 | Disease Resistance Protein (CC-NBS-LRR Class), Putative                                                                                                                                  |
| P0506C07.2   | Thioredoxin H-Type (TRX-H)                    | At1g19730 | ATTRX4 (Thioredoxin H-Type 4); Thiol-Disulfide Exchange Intermediate                                                                                                                     |
| P0506C07.26  | Putative Actin Interacting Protein            | At4g36400 | FAD Linked Oxidase Family Protein                                                                                                                                                        |
| P0506E04.16  | Putative Thiamine Pyrophosphokinase           | At2g44750 | Thiamin Pyrophosphokinase, Putative                                                                                                                                                      |
| P0506E04.5   | Hypothetical Protein                          | At3g25270 | Unknown Protein                                                                                                                                                                          |
| P0506F02.101 | Unknown Protein                               | At2g22010 | Zinc Finger (C3HC4-Type RING Finger) Family Protein                                                                                                                                      |
| P0506F02.102 | Putative 4-Alpha-Glucanotransferase           | At5g64860 | DPE1 (DISPROPORTIONATING ENZYME); 4-Alpha-Glucanotransferase                                                                                                                             |
| P0506F02.114 | Putative GTP-Binding Protein DRG              | At4g39520 | GTP-Binding Protein, Putative                                                                                                                                                            |
| P0506F02.124 | Putative Receptor-Like Protein Kinase 4       | At4g23160 | Protein Kinase Family Protein                                                                                                                                                            |
| P0506F02.128 | Putative Myb Protein                          | At3g47600 | MYB94 (Myb Domain Protein 94); DNA Binding / Transcription Factor                                                                                                                        |
| P0507H06.12  | Unknown Protein                               | At5g43660 | Oxidoreductase, Acting On Paired Donors, With Incorporation Or Reduction Of Molecular Oxygen, 2-Oxoglutarate As One Donor, And Incorporation Of One Atom Each Of Oxygen Into Both Donors |
| P0507H12.6   | Putative Succinate Dehydrogenase Flavoprotein | At5g66760 | SDH1-1 (Succinate Dehydrogenase 1-1)                                                                                                                                                     |
| P0508B05.10  | Unknown Protein                               | At5g46960 | Invertase/Pectin Methyltransferase Inhibitor Family Protein                                                                                                                              |
| P0508B05.30  | Putative Vacuolar-Type H+-Translocating       | At1g16780 | Vacuolar-Type H+-Translocating Inorganic Pyrophosphatase, Putative                                                                                                                       |
| P0509B06.12  | Putative 0-Deacetylbaaccatin III-10-O-Acetyl  | At3g03480 | CHAT (ACETYL COA:(Z)-3-HEXEN-1-OL ACETYLTRANSFERASE); Acetyl Coa:(Z)-3-Hexen-1-Ol Acetyltransferase                                                                                      |
| P0509B06.2   | Putative Aspartate Transaminase               | At1g80360 | Aminotransferase Class I And II Family Protein                                                                                                                                           |
| P0510C12.1   | Putative Polyubiquitin                        | At1g65350 | UBQ13 (Ubiquitin 13)                                                                                                                                                                     |
| P0510F09.19  | Hypothetical Protein                          | At5g11960 | Hypothetical Protein                                                                                                                                                                     |
| P0510F09.21  | Lysine Decarboxylase-Like Protein             | At5g11950 | Hypothetical Protein                                                                                                                                                                     |
| P0510F09.22  | SPP30 Homolog                                 | At5g58030 | Transport Protein Particle (TRAPP) Component Bet3 Family Protein                                                                                                                         |

|               |                                                |           |                                                                                                 |
|---------------|------------------------------------------------|-----------|-------------------------------------------------------------------------------------------------|
| P0512C01.16   | Putative Peptide Transporter                   | At1g52190 | Proton-Dependent Oligopeptide Transport (POT) Family Protein                                    |
| P0512C01.2    | Putative Permease 1                            | At2g34190 | Xanthine/Uracil Permease Family Protein                                                         |
| P0512C01.25   | Glutelin Type I Precursor                      | At1g03890 | Cupin Family Protein                                                                            |
| P0512C01.3    | Putative Dynein Light Chain                    | At5g20110 | Dynein Light Chain, Putative                                                                    |
| P0512C01.36   | Putative Glycerophosphoryl Diester             | At5g08030 | Glycerophosphoryl Diester Phosphodiesterase Family Protein                                      |
| P0512C01.5    | Unknown Protein                                | At1g52240 | ATROPGEF11/ROPGEF11 (KINASE PARTNER PROTEIN-LIKE); Rho Guanyl-Nucleotide Exchange Factor        |
| P0512C01.6    | Hypothetical Protein                           | At4g23440 | Transmembrane Receptor                                                                          |
| P0512C01.8    | Aspartate Aminotransferase                     | At5g11520 | Asp3 (Aspartate Aminotransferase 3)                                                             |
| P0512G09.14   | Unknown Protein                                | At3g46480 | Oxidoreductase, 2OG-Fe(II) Oxygenase Family Protein                                             |
| P0512G09.7    | Unknown Protein                                | At5g11700 | Glycine-Rich Protein                                                                            |
| P0512H04.9-2  | Unknown Protein                                | At2g25800 | Unknown Protein                                                                                 |
| P0514G12.27   | Unknown Protein                                | At3g53210 | Nodulin Mtn21 Family Protein                                                                    |
| P0514G12.39   | Osey1                                          | At2g35320 | ATEYA (ARABIDOPSIS THALIANA EYES ABSENT HOMOLOG); Protein Tyrosine Phosphatase, Metal-Dependent |
| P0514G12.8    | Ferredoxin-NADP+ Reductase                     | At1g20020 | Atlfnr2 (Leaf Fnr 2)                                                                            |
| P0514H03.3    | Hypothetical Protein                           | At4g21300 | Pentatricopeptide (PPR) Repeat-Containing Protein                                               |
| P0515A04.20   | Putative Elicitor Inducible Beta-1,3-Glucanase | At4g17180 | Glycosyl Hydrolase Family 17 Protein                                                            |
| P0515A04.25   | Cation Exchanger-Like Protein                  | At1g54110 | Cation Exchanger, Putative (CAX10)                                                              |
| P0515A04.36   | Putative NBS-LRR Type Disease Resistance       | At4g26090 | Rps2 (Resistant To P. Syringae 2)                                                               |
| P0516G10.12-1 | Putative Proline-Rich Protein APG              | At1g33810 | Unknown Protein                                                                                 |
| P0516G10.12-2 | Unknown Protein                                | At2g23540 | GDSL-Motif Lipase/Hydrolase Family Protein                                                      |
| P0518C01.10   | Putative Cytochrome B5                         | At2g32720 | B5 #4 (Cytochrome B5 Family Protein #4); Heme Binding / Transition Metal Ion Binding            |
| P0518C01.3    | Unknown Protein                                | At3g27110 | Peptidase M48 Family Protein                                                                    |
| P0518C01.6    | Unknown Protein                                | At3g48250 | Pentatricopeptide (PPR) Repeat-Containing Protein                                               |
| P0518C01.9    | Putative Cysteine Proteinase                   | At1g20850 | XCP2 (XYLEM CYSTEINE PEPTIDASE 2); Cysteine-Type Peptidase/ Peptidase                           |
| P0518F01.10   | Hypothetical Protein                           | At4g29530 | 2,3-Diketo-5-Methylthio-1-Phosphopentane Phosphatase Family                                     |
| P0518F01.14   | Putative Chlorophyll A/B-Binding Protein 2     | At2g34430 | LHB1B1 (Photosystem II Light Harvesting Complex Gene 1.4); Chlorophyll Binding                  |
| P0518F01.24   | Putative Cytochrome P450                       | At3g14630 | CYP72A9 (Cytochrome P450, Family 72, Subfamily A, Polypeptide 9); Oxygen Binding                |
| P0518F01.9    | Hypothetical Protein                           | At4g13650 | Pentatricopeptide (PPR) Repeat-Containing Protein                                               |
| P0519A12.14   | Putative Glutaredoxin I                        | At1g77370 | Glutaredoxin, Putative                                                                          |
| P0519A12.15   | Putative Aldehyde Dehydrogenase                | At1g44170 | Aldh3h1 (Aldehyde Dehydrogenase 4)                                                              |
| P0519D04.19   | Hypothetical Protein                           | At5g11540 | FAD-Binding Domain-Containing Protein                                                           |
| P0519E02.19   | Unknown Protein                                | At5g49830 | Hypothetical Protein                                                                            |
| P0519E02.23   | Putative Squalene Synthase                     | At4g34640 | SQS1 (SQUALENE SYNTHASE 1); Farnesyl-Diphosphate Farnesyltransferase                            |
| P0519E06.15   | Amino Acid Permease-Like                       | At1g05940 | CAT9 (CATIONIC AMINO ACID TRANSPORTER 9); Cationic Amino Acid Transporter                       |



|               |                                                 |           |                                                                                                                    |
|---------------|-------------------------------------------------|-----------|--------------------------------------------------------------------------------------------------------------------|
| P0519E06.2    | Unknown Protein                                 | At2g44850 | Unknown Protein                                                                                                    |
| P0519E06.25   | Putative Cell Division Cycle Protein 23         | At3g48150 | APC8 (Anaphase-Promoting Complex/Cyclosome 8); Binding                                                             |
| P0519E12.121  | Putative Transmembrane Protein                  | At1g14010 | Emp24/Gp25l/P24 Family Protein                                                                                     |
| P0519E12.133  | DEAD Box Protein-Like                           | At1g16280 | DEAD/DEAH Box Helicase, Putative                                                                                   |
| P0519E12.134  | Unknown Protein                                 | At4g08810 | SUB1 (Short Under Blue Light 1)                                                                                    |
| P0520B06.15   | Putative TATA Binding Protein-Associated Factor | At1g04950 | TAFII59 (TATA Box Associated Factor II 59); Transcription Initiation Factor                                        |
| P0520B06.18   | Unknown Protein                                 | At1g68300 | Universal Stress Protein (USP) Family Protein                                                                      |
| P0520B06.19   | Unknown Protein                                 | At4g05400 | Unknown Protein                                                                                                    |
| P0520B06.20   | Putative 26S Proteasome Subunit                 | At5g45620 | 26S Proteasome Regulatory Subunit, Putative (RPN9)                                                                 |
| P0520B06.4    | Oryza Sativa MAP Kinase Kinase 1                | At5g56580 | ATMKK6 (ARABIDOPSIS NQK1); Kinase                                                                                  |
| P0521F09.28   | Putative Uracil Phosphoribosyltransferase       | At1g55810 | Uracil Phosphoribosyltransferase, Putative / UMP Pyrophosphorylase, Putative / Uprtase, Putative                   |
| P0523A04.108  | Unknown Protein                                 | At5g05950 | MEE60 (Maternal Effect Embryo Arrest 60)                                                                           |
| P0523B07.38-1 | Putative Polyphosphoinositide Binding Protein   | At5g47730 | SEC14 Cytosolic Factor, Putative / Polyphosphoinositide-Binding Protein, Putative                                  |
| P0523B07.45   | Putative Protein Kinase G11A                    | At5g47750 | Protein Kinase, Putative                                                                                           |
| P0523B07.46   | Putative Ribosomal Protein L17                  | At1g27400 | 60S Ribosomal Protein L17 (RPL17A)                                                                                 |
| P0523B07.7    | Putative Flavonol 4'-Sulfotransferase           | At5g07010 | Sulfotransferase Family Protein                                                                                    |
| P0524E08.104  | Hydrolase-Like Protein                          | At5g09430 | Hydrolase                                                                                                          |
| P0524E08.106  | Unknown Protein                                 | At1g34640 | Unknown Protein                                                                                                    |
| P0524E08.108  | Unknown Protein                                 | At1g78190 | TRM112-Like Protein                                                                                                |
| P0524E08.116  | Unknown Protein                                 | At1g35780 | Unknown Protein                                                                                                    |
| P0524E08.130  | Putative Trehalose-6-Phosphate Phosphatase      | At5g65140 | Trehalose-6-Phosphate Phosphatase, Putative                                                                        |
| P0524E08.133  | UMP/CMP Kinase A                                | At3g60180 | Uridylate Kinase, Putative / Uridine Monophosphate Kinase, Putative / UMP Kinase, Putative                         |
| P0524F03.27   | Putative Golgi SNARE Protein                    | At1g15880 | GOS11 (GOLGI SNARE 11); SNARE Binding                                                                              |
| P0524F03.3    | Exostosin Family-Like Protein                   | At3g03650 | EDA5 (Embryo Sac Development Arrest 5); Catalytic                                                                  |
| P0524G08.101  | Unknown Protein                                 | At3g12260 | Complex 1 Family Protein / LVR Family Protein                                                                      |
| P0524G08.102  | Putative Xylulose Kinase                        | At5g49650 | Xylulose Kinase, Putative                                                                                          |
| P0524G08.110  | Putative Calcium/Calmodulin-Dependent Protein   | At2g41140 | CRK1 (CDPK-RELATED KINASE 1); Calcium Ion Binding / Calcium-Dependent Protein Serine/Threonine Phosphatase/ Kinase |
| P0524G08.116  | 10 Kda Chaperonin                               | At5g20720 | CPN20 (CHAPERONIN 20); Calmodulin Binding                                                                          |
| P0524G08.122  | Lipase-Like Protein                             | At1g28600 | Carboxylic Ester Hydrolase                                                                                         |
| P0524G08.123  | Transport Protein Particle Component Bet3-Like  | At5g54750 | Transport Protein Particle (TRAPP) Component Bet3, Putative                                                        |
| P0524G08.134  | Putative Transcription Factor APFI              | At1g47260 | APFI; Carbonate Dehydratase                                                                                        |
| P0528B09.18   | Glyceraldehyde-3-Phosphate Dehydrogenase        | At2g24270 | ALDH11A3 (Aldehyde Dehydrogenase 11A3); 3-Chloroallyl Aldehyde Dehydrogenase                                       |
| P0528B09.19   | Putative Omega-6 Fatty Acid Desaturase,         | At4g30950 | FAD6 (FATTY ACID DESATURASE 6); Omega-6 Fatty Acid Desaturase                                                      |
| P0528B09.25   | Putative CBL-Interacting Protein Kinase         | At4g30960 | CIPK6 (CBL-INTERACTING PROTEIN KINASE 6); Kinase                                                                   |

|               |                                             |           |                                                                                                      |
|---------------|---------------------------------------------|-----------|------------------------------------------------------------------------------------------------------|
| P0528B09.35-1 | Putative Cinnamoyl-Coa Reductase            | At1g15950 | Ccr1 (Cinnamoyl Coa Reductase 1)                                                                     |
| P0528B09.37   | Putative Chorismate Mutase                  | At5g10870 | ATCM2 (CHORISMATE MUTASE 2); Chorismate Mutase                                                       |
| P0529E05.10   | Hypothetical Protein                        | At3g09060 | Pentatricopeptide (PPR) Repeat-Containing Protein                                                    |
| P0529E05.11   | Hypothetical Protein                        | At3g09050 | Unknown Protein                                                                                      |
| P0529E05.15   | Unknown Protein                             | At2g39940 | COI1 (CORONATINE INSENSITIVE 1); Ubiquitin-Protein Ligase                                            |
| P0529H11.17   | Putative Laccase                            | At3g09220 | LAC7 (Laccase 7); Copper Ion Binding / Oxidoreductase                                                |
| P0529H11.19   | Unknown Protein                             | At2g37970 | SOUL Heme-Binding Family Protein                                                                     |
| P0529H11.24   | Ataxin 3-Like Protein                       | At3g54130 | Josephin Family Protein                                                                              |
| P0529H11.26   | Putative Steroid Reductase DET2             | At2g38050 | Det2 (De-Etiolated 2)                                                                                |
| P0529H11.27   | Alpha 1,4-Glucan Phosphorylase H Isozyme    | At3g46970 | ATPHS2/PHS2 (ALPHA-GLUCAN PHOSPHORYLASE 2); Phosphorylase/ Transferase, Transferring Glycosyl Groups |
| P0529H11.3    | Unknown Protein                             | At3g54020 | Phosphatidic Acid Phosphatase-Related / PAP2-Related                                                 |
| P0529H11.31   | Hypothetical Protein                        | At3g46980 | Carbohydrate Transporter/ Sugar Porter                                                               |
| P0530H10.9    | Putative Ferrochelatase II                  | At2g30390 | Ferrochelatase II                                                                                    |
| P0533E11.20   | Cytokinesis-Related Sec1 Protein-Like       | At1g12360 | KEU (KEULE); Protein Transporter                                                                     |
| P0534A03.127  | Putative Vacuolar ATP Synthase Subunit H    | At3g42050 | Vacuolar ATP Synthase Subunit H Family Protein                                                       |
| P0534H07.20   | Extensin-Like Protein                       | At3g22800 | Leucine-Rich Repeat Family Protein / Extensin Family Protein                                         |
| P0534H07.34   | Putative Z-Protein                          | At1g03070 | Glutamate Binding                                                                                    |
| P0534H07.8    | Putative Inositol-1,4,5-Trisphosphate       | At3g63240 | Endonuclease/Exonuclease/Phosphatase Family Protein                                                  |
| P0537A05.2    | Putative Peroxidase                         | At5g64120 | Peroxidase, Putative                                                                                 |
| P0537A05.24   | Hypothetical Protein                        | At5g30145 | Unknown Protein                                                                                      |
| P0539D10.15   | Putative Xyloglucan Fucosyltransferase      | At2g03220 | FT1 (FUCOSYLTRANSFERASE 1); Fucosyltransferase/ Transferase, Transferring Glycosyl Groups            |
| P0539D10.17   | Putative Light-Harvesting Chlorophyll-A/B   | At1g45474 | LHCA5 (Photosystem I Light Harvesting Complex Gene 5)                                                |
| P0539D10.4    | Hypothetical Protein                        | At5g37770 | TCH2 (TOUCH 2); Calcium Ion Binding                                                                  |
| P0543C11.29   | Putative Nicotianamine Aminotransferase A   | At5g53970 | Aminotransferase, Putative                                                                           |
| P0543C11.34   | Putative Dnaj-Like Protein                  | At2g20560 | DNAJ Heat Shock Family Protein                                                                       |
| P0543C11.35   | Putative Guanylate Binding Protein          | At5g46070 | GTP Binding / Gtpase                                                                                 |
| P0543C11.42   | Hypothetical Protein                        | At1g19480 | Hhh-GPD Base Excision DNA Repair Family Protein                                                      |
| P0543D10.15   | Putative Aminopeptidase N                   | At1g63770 | Peptidase M1 Family Protein                                                                          |
| P0543D10.17-1 | Putative Ripening Regulated Protein DDTFR18 | At4g25640 | MATE Efflux Family Protein                                                                           |
| P0543D10.26   | Putative SAP1 Protein                       | At3g04570 | DNA-Binding Protein-Related                                                                          |
| P0543D10.30   | Putative Bet1/Sft1-Related SNARE (Atbs14a)  | At3g58170 | ATBS14A; Protein Transporter                                                                         |
| P0544B02.10   | Putative Glossy1 Protein                    | At5g57800 | WAX2; Catalytic                                                                                      |
| P0544B02.16   | Putative Glutamine Amidotransferase Class-I | At2g23970 | Defense-Related Protein, Putative                                                                    |
| P0544B02.21   | Putative RAD23 Protein                      | At1g16190 | DNA Repair Protein RAD23, Putative                                                                   |

|              |                                                  |           |                                                                                                                                    |
|--------------|--------------------------------------------------|-----------|------------------------------------------------------------------------------------------------------------------------------------|
| P0544B02.25  | Putative Adiponectin Receptor 1                  | At4g30850 | Hhp2 (Heptahelical Transmembrane Protein2)                                                                                         |
| P0544B02.28  | Unknown Protein                                  | At4g30790 | Unknown Protein                                                                                                                    |
| P0544B02.31  | Putative Protein Phosphatase Type-2C             | At4g31860 | Protein Phosphatase 2C, Putative / PP2C, Putative                                                                                  |
| P0544B02.33  | Unknown Protein                                  | At2g24020 | Unknown Protein                                                                                                                    |
| P0544B02.5   | Putative Dem Protein                             | At4g33400 | Dem Protein-Related / Defective Embryo And Meristems Protein-Related                                                               |
| P0544G09.12  | Putative Cytochrome P450 (CYP78A9)               | At3g61880 | CYP78A9 (CYTOCHROME P450 78A9); Oxygen Binding                                                                                     |
| P0544G09.23  | Putative Pepper Esterase                         | At5g62180 | ATCXE20 (ARABIDOPSIS THALIANA CARBOXYESTERASE 20); Carboxylesterase                                                                |
| P0544G09.25  | Putative P450 Monooxygenase                      | At4g12310 | CYP706A5 (Cytochrome P450, Family 706, Subfamily A, Polypeptide 5); Oxygen Binding                                                 |
| P0544G09.31  | Putative ER Lumen Protein-Retaining Receptor     | At1g75760 | ER Lumen Protein Retaining Receptor Family Protein                                                                                 |
| P0544G09.37  | Putative Armadillo Repeat Containing Protein     | At5g66200 | Armadillo/Beta-Catenin Repeat Family Protein                                                                                       |
| P0544G09.9   | Putative Gtpase-Activating Protein GYP7 (GAP For | At5g53570 | Rabgap/TBC Domain-Containing Protein                                                                                               |
| P0544H11.26  | Putative Cytochrome P450 Monooxygenase           | At2g26710 | BAS1 (PHYB ACTIVATION TAGGED SUPPRESSOR 1); Oxygen Binding                                                                         |
| P0544H11.36  | Unknown Protein                                  | At4g32460 | Unknown Protein                                                                                                                    |
| P0544H11.38  | 26S Proteasome Regulatory Particle Triple-A      | At5g19990 | ATSUG1; Atpase                                                                                                                     |
| P0544H11.39  | Putative Serine-Threonine Kinase                 | At3g15610 | Transducin Family Protein / WD-40 Repeat Family Protein                                                                            |
| P0544H11.40  | Putative Beta-Ketoacyl-Coa-Synthase              | At2g26640 | Beta-Ketoacyl-Coa Synthase, Putative                                                                                               |
| P0547A06.49  | Roc1(Homeobox Protein)                           | At4g04890 | PDF2 (PROTODERMAL FACTOR2); DNA Binding / Transcription Factor                                                                     |
| P0552F09.101 | Sucrose Synthase 3 (Sucrose-UDP                  | At3g43190 | SUS4; UDP-Glycosyltransferase/ Sucrose Synthase/ Transferase, Transferring Glycosyl Groups                                         |
| P0552F09.104 | Disease Resistance Response Protein-Like         | At5g42500 | Disease Resistance-Responsive Family Protein                                                                                       |
| P0552F09.120 | Putative Alanine Aminotransferase                | At1g72330 | Alaat2 (Alanine Aminotransferase 2)                                                                                                |
| P0554D10.14  | Putative Polygalacturonase PG2                   | At1g48100 | Glycoside Hydrolase Family 28 Protein / Polygalacturonase (Pectinase) Family Protein                                               |
| P0554D10.25  | Putative Lipase Homolog                          | At1g09390 | GDSL-Motif Lipase/Hydrolase Family Protein                                                                                         |
| P0554D10.26  | Bromelain-Like Thiol Protease                    | At2g34080 | Cysteine Proteinase, Putative                                                                                                      |
| P0554F08.13  | Putative Peptidyl-Trna Hydrolase (PTH)           | At1g18440 | Peptidyl-Trna Hydrolase Family Protein                                                                                             |
| P0554F08.4   | Putative P-Glycoprotein                          | At2g47000 | PGP4 (P-GLYCOPROTEIN 4, P-GLYCOPROTEIN4); Atpase, Coupled To Transmembrane Movement Of Substances / Xenobiotic-Transporting Atpase |
| P0554F08.6   | Putative Phosphoethanolamine                     | At1g48600 | Phosphoethanolamine N-Methyltransferase 2, Putative (NMT2)                                                                         |
| P0554F08.7   | Unknown Protein                                  | At1g14910 | Epsin N-Terminal Homology (ENTH) Domain-Containing Protein                                                                         |
| P0556A11.20  | Putative KH Domain Protein                       | At5g46190 | KH Domain-Containing Protein                                                                                                       |
| P0557A01.5   | Hypothetical Protein                             | At1g68980 | Pentatricopeptide (PPR) Repeat-Containing Protein                                                                                  |
| P0557D09.17  | RRM-Containing RNA-Binding Protein-Like          | At1g07360 | Zinc Finger (CCCH-Type) Family Protein / RNA Recognition Motif (RRM)-Containing Protein                                            |
| P0557D09.31  | Putative Aldehyde Oxidase                        | At2g27150 | Aao3 (Abscisic Aldehyde Oxidase 3)                                                                                                 |
| P0560B06.13  | Putative DNA-Dependent Atpase                    | At3g06400 | CHR11 (CHROMATIN-REMODELING PROTEIN 11); DNA-Dependent Atpase                                                                      |
| P0560B06.28  | Hypothetical Protein                             | At5g18600 | Glutaredoxin Family Protein                                                                                                        |
| P0560B06.30  | Cullin-Like Protein                              | At1g43140 | Hypothetical Protein                                                                                                               |

|               |                                                  |           |                                                                                                            |
|---------------|--------------------------------------------------|-----------|------------------------------------------------------------------------------------------------------------|
| P0560B06.33   | Putative Potassium Transporter                   | At4g33530 | KUP5 (K+ Uptake Permease 5); Potassium Ion Transporter                                                     |
| P0560B08.103  | Putative Dihydropterin Pyrophosphokinase         | At4g30000 | Dihydropterin Pyrophosphokinase, Putative / Dihydropteroate Synthase, Putative / DHPS, Putative            |
| P0560B08.106  | Putative Caltractin                              | At3g50360 | ATCEN2 (CENTRIN2); Calcium Ion Binding                                                                     |
| P0560B08.109  | Myosin Heavy Chain-Like                          | At4g33390 | Unknown Protein                                                                                            |
| P0560C03.1    | Putative Threonine Synthase                      | At4g29840 | MTO2 (METHIONINE OVER-ACCUMULATOR); Threonine Synthase                                                     |
| P0560C03.15   | Unknown Protein                                  | At3g18390 | Emb1865 (Embryo Defective 1865)                                                                            |
| P0562A06.20   | Putative Gibberellin Action Negative Regulator   | At3g11540 | Spy (Spindly)                                                                                              |
| P0562A06.21   | Cyclophilin                                      | At2g36130 | Peptidyl-Prolyl Cis-Trans Isomerase, Putative / Cyclophilin, Putative / Rotamase, Putative                 |
| P0562A06.23   | Putative Dihydroxy-Acid Dehydratase              | At3g23940 | Dehydratase Family                                                                                         |
| P0562A06.4    | Putative Auxin-Regulated Protein                 | At5g03880 | Unknown Protein                                                                                            |
| P0562A06.8    | Putative Vesicle-Associated Membrane Protein 725 | At3g54300 | ATVAMP727 (Arabidopsis Thaliana Vesicle-Associated Membrane Protein 727)                                   |
| P0564H06.1    | Putative GST6 Protein                            | At1g17180 | ATGSTU25 (Arabidopsis Thaliana Glutathione S-Transferase (Class Tau) 25); Glutathione Transferase          |
| P0564H06.14   | Putative Polyamine Oxidase Precursor             | At5g13700 | APAO/ATPAO1 (POLYAMINE OXIDASE 1); FAD Binding / Polyamine Oxidase                                         |
| P0564H06.24   | Hypothetical Protein                             | At1g11660 | ATP Binding                                                                                                |
| P0565A07.136  | Putative Ethylene-Responsive Small GTP-Binding   | At5g59840 | Ras-Related GTP-Binding Family Protein                                                                     |
| P0565A07.137  | Unknown Protein                                  | At2g35730 | Heavy-Metal-Associated Domain-Containing Protein                                                           |
| P0567H04.15   | Chlorophyll A/B-Binding Protein                  | At5g01530 | Chlorophyll A-B Binding Protein CP29 (LHCB4)                                                               |
| P0567H04.16-1 | Inositol Phosphatase-Like Protein                | At2g20890 | Psb29 (Thylakoid Formation1)                                                                               |
| P0567H04.24   | Membrane Lipoprotein Lipid Attachment            | At5g54240 | Unknown Protein                                                                                            |
| P0567H04.30   | Arm Repeat Containing Protein-Like               | At1g61350 | Armadillo/Beta-Catenin Repeat Family Protein                                                               |
| P0571D04.111  | Putative Expansin Protein Family (EXPL2)         | At4g38400 | Atexla2 (Arabidopsis Thaliana Expansin-Like A2)                                                            |
| P0571D04.117  | Putative EBNA1-Binding Protein Homolog           | At3g22660 | Rna Processing Protein-Related                                                                             |
| P0572D06.34   | Putative N7 Protein                              | At4g05490 | F-Box Family Protein (FBL22)                                                                               |
| P0572D06.37-1 | Putative Nonclathrin Coat Protein Zeta2-COP      | At1g60970 | Clathrin Adaptor Complex Small Chain Family Protein                                                        |
| P0574F11.14   | Putative Acetyl-Coa C-Acyltransferase            | At5g48230 | ACAT2/EMB1276 (ACETOACETYL-COA THIOLASE 2, EMBRYO DEFECTIVE 1276); Acetyl-Coa C-Acetyltransferase          |
| P0574F11.31   | Putative Ubiquitin-Protein Ligase 1              | At1g70320 | UPL2 (UBIQUITIN-PROTEIN LIGASE 2); Ubiquitin-Protein Ligase                                                |
| P0574F11.34   | NOI Protein                                      | At1g35940 | AT Hook Motif-Containing Protein-Related                                                                   |
| P0574F11.8    | C2 Domain-Containing Protein-Like                | At5g47710 | C2 Domain-Containing Protein                                                                               |
| P0575F10.12   | Putative Eukaryotic Translation Initiation       | At3g56150 | Eif3c (Eukaryotic Translation Initiation Factor 3)                                                         |
| P0575F10.14   | Putative NADPH-Dependent Mannose 6-Phosphate     | At2g21250 | Mannose 6-Phosphate Reductase (NADPH-Dependent), Putative                                                  |
| P0575F10.15   | Phosphatidylinositol Synthase                    | At4g38570 | CDP-Diacylglycerol--Inositol 3-Phosphatidyltransferase, Putative / Phosphatidylinositol Synthase, Putative |
| P0575F10.36   | Putative 3-Isopropylmalate Dehydratase Large     | At4g13430 | Aconitase Family Protein / Aconitate Hydratase Family Protein                                              |
| P0575F10.6-1  | Putative Arginine/Serine-Rich Splicing Factor    | At4g25500 | ATRSP35 (Arabidopsis Thaliana Arginine/Serine-Rich Splicing Factor 35)                                     |

|                |                                                |           |                                                                                                                                           |
|----------------|------------------------------------------------|-----------|-------------------------------------------------------------------------------------------------------------------------------------------|
| P0576F08.10    | Putative SINA2 Protein,Seven In Absentia       | At3g58040 | Seven In Absentia (SINA) Family Protein                                                                                                   |
| P0576F08.1-1   | Putative Phosphoribosyl Pyrophosphate Synthase | At2g44530 | Ribose-Phosphate Pyrophosphokinase, Putative / Phosphoribosyl Diphosphate Synthetase, Putative                                            |
| P0576F08.2     | Putative Xyloglucan Endo-1,4-Beta-D-Glucanase  | At1g32170 | XTR4 (XYLOGLUCAN ENDOTRANGLYCOSYLASE 4); Hydrolase, Acting On Glycosyl Bonds                                                              |
| P0576F08.31    | Hypothetical Protein                           | At5g17670 | Hydrolase                                                                                                                                 |
| P0576F08.33    | Putative Amidotransferase                      | At5g60540 | ATPDX2/EMB2407/PDX2 (PYRIDOXINE BIOSYNTHESIS 2); Glutaminase/ Glutamyl-Trna(Gln) Amidotransferase/ Protein Heterodimerization             |
| P0577B11.124   | Putative CTP:Phosphorylcholine                 | At2g32260 | Cholinephosphate Cytidyltransferase, Putative / Phosphorylcholine Transferase, Putative / CTP:Phosphocholine Cytidyltransferase, Putative |
| P0577B11.125   | Putative Heat Shock Protein 40                 | At1g10350 | DNAJ Heat Shock Protein, Putative                                                                                                         |
| P0577B11.132   | WD-40 Repeat Protein-Like                      | At1g15750 | Tpl/Wsip1 (Wus-Interacting Protein 1)                                                                                                     |
| P0580A11.104   | Putative DNA Repair Protein                    | At1g05120 | SNF2 Domain-Containing Protein / Helicase Domain-Containing Protein / RING Finger Domain-Containing Protein                               |
| P0581F09.10    | Hypothetical Protein                           | At5g12260 | Hypothetical Protein                                                                                                                      |
| P0581F09.16    | Hypothetical Protein                           | At3g17610 | Unknown Protein                                                                                                                           |
| P0582D05.112   | Putative Cold Shock Protein-1                  | At2g21060 | ATGRP2B (GLYCINE-RICH PROTEIN 2B); Nucleic Acid Binding                                                                                   |
| P0582D05.130-1 | 60S Acidic Ribosomal Protein P0                | At2g40010 | 60S Acidic Ribosomal Protein P0 (RPP0A)                                                                                                   |
| P0582D05.131   | Putative Non-Phototropic Hypocotyl 3           | At1g30440 | Phototropic-Responsive NPH3 Family Protein                                                                                                |
| P0582D05.138   | Putative Pentatricopeptide (PPR)               | At1g53600 | Pentatricopeptide (PPR) Repeat-Containing Protein                                                                                         |
| P0582D05.139   | Putative Cytochrome P450 Protein               | At1g01280 | CYP703A2 (Cytochrome P450, Family 703, Subfamily A, Polypeptide 2); Oxygen Binding                                                        |
| P0583B06.11    | Putative RAE1 (RNA Export 1, S.Pombe) Homolog  | At1g80670 | Transducin Family Protein / WD-40 Repeat Family Protein                                                                                   |
| P0583G08.11    | Putative Receptor-Like Kinase                  | At4g33430 | BAK1 (BRI1-ASSOCIATED RECEPTOR KINASE); Kinase                                                                                            |
| P0584E12.40-1  | Unknown Protein                                | At5g15880 | Unknown Protein                                                                                                                           |
| P0585B01.16    | Putative L-Aspartate Oxidase                   | At5g14760 | AO (L-ASPARTATE OXIDASE); L-Aspartate Oxidase                                                                                             |
| P0585B01.25    | Putative Blast And Wounding Induced            | At3g18040 | MPK9 (MAP KINASE 9); MAP Kinase                                                                                                           |
| P0585B01.27    | Putative Tyrosine Kinase Wee1                  | At1g02970 | WEE1 (Arabidopsis Wee1 Kinase Homolog); Kinase/ Protein Kinase                                                                            |
| P0585B01.29-1  | Putative HGA1                                  | At3g57380 | Unknown Protein                                                                                                                           |
| P0585B01.29-2  | Putative HGA1                                  | At3g18170 | Unknown Protein                                                                                                                           |
| P0585B01.3     | Putative Proteasome Subunit Alpha Type 1       | At5g42790 | PAF1 (Proteasome Alpha Subunit F1); Peptidase                                                                                             |
| P0585G03.10    | Putative Permease 1                            | At5g62890 | Permease, Putative                                                                                                                        |
| P0585G03.19    | Small GTP-Binding Protein Osrac3               | At5g62880 | ARAC10/ATRAC10/Atrop11 (Rho-Related Protein From Plants 11); GTP Binding                                                                  |
| P0585G03.2     | Putative Altered Response To Gravity           | At1g24120 | ARL1 (ARG1-LIKE1); Heat Shock Protein Binding / Unfolded Protein Binding                                                                  |
| P0585G03.23    | Putative Degp2 Protease                        | At5g40200 | DEGP9 (DEGP PROTEASE 9); Serine-Type Peptidase/ Trypsin                                                                                   |
| P0585G03.4     | Putative Mannosyl-Oligosaccharide              | At1g27520 | Glycoside Hydrolase Family 47 Protein                                                                                                     |
| P0585H11.109   | Putative Phytosulfokine Receptor               | At5g53890 | Leucine-Rich Repeat Transmembrane Protein Kinase, Putative                                                                                |
| P0589E08.4     | Putative N-Acetylglucosamine-Phosphate Mutase  | At5g18070 | DRT101 (DNA-DAMAGE-REPAIR/TOLERATION 101); Intramolecular Transferase, Phosphotransferases                                                |

|              |                                                |           |                                                                                                  |
|--------------|------------------------------------------------|-----------|--------------------------------------------------------------------------------------------------|
| P0592C06.112 | Putative Eif3e (Subunits Of Eukaryotic         | At3g57290 | EIF3E (Eukaryotic Translation Initiation Factor 3E)                                              |
| P0592G05.19  | Unknown Protein                                | At1g27340 | F-Box Family Protein                                                                             |
| P0594D10.112 | Putative Clathrin-Adaptor Medium Chain Apm 4   | At4g24550 | Clathrin Adaptor Complexes Medium Subunit Family Protein                                         |
| P0594D10.119 | Putative D-Type Cyclin                         | At2g22490 | CYCD2;1 (CYCLIN D2;1); Cyclin-Dependent Protein Kinase Regulator/ Protein Binding                |
| P0594D10.123 | Putative FH Protein Interacting Protein FIP1   | At1g28200 | Fip1 (Fh Interacting Protein 1)                                                                  |
| P0594D10.125 | Putative DEAD/H (Asp-Glu-Ala-Asp/His) Box      | At4g01020 | Helicase Domain-Containing Protein / IBR Domain-Containing Protein / Zinc Finger Protein-Related |
| P0594D10.128 | Putative Alcohol Dehydrogenase                 | At1g22440 | Alcohol Dehydrogenase, Putative                                                                  |
| P0594D10.134 | Putative Protein Kinase Hvpkaba1(Abcisic       | At4g33950 | OST1 (OPEN STOMATA 1); Kinase/ Protein Kinase                                                    |
| P0594D10.135 | Putative 40S Ribosomal Protein S6              | At5g10360 | EMB3010 (EMBRYO DEFECTIVE 3010); Structural Constituent Of Ribosome                              |
| P0597G07.107 | Protein Phosphatase 2C-Like                    | At1g09160 | Protein Phosphatase 2C-Related / PP2C-Related                                                    |
| P0597G07.115 | Putative Pectin Methyltransferase              | At3g05610 | Pectinesterase Family Protein                                                                    |
| P0599F09.13  | Putative Serine/Threonine-Protein Kinase 16    | At5g08160 | ATPK3 (Arabidopsis Thaliana Serine/Threonine Protein Kinase 3); Kinase                           |
| P0599F09.17  | Brain Protein 44-Like                          | At5g20090 | Unknown Protein                                                                                  |
| P0599F09.21  | Putative Strictosidine Synthase                | At1g74000 | Ss3 (Strictosidine Synthase 3)                                                                   |
| P0604E01.20  | Putative Polcalcin Phl P 7 (Calcium-Binding    | At1g73630 | Calcium-Binding Protein, Putative                                                                |
| P0604E01.39  | Putative Mtn21                                 | At3g18200 | Nodulin Mtn21 Family Protein                                                                     |
| P0604E01.45  | Putative Expansin 11 Precursor                 | At2g37640 | Atexpa3 (Arabidopsis Thaliana Expansin A3)                                                       |
| P0604E01.47  | Putative Malate Dehydrogenase [NADP],          | At5g58330 | Malate Dehydrogenase (NADP), Chloroplast, Putative                                               |
| P0604E01.52  | Putative AER                                   | At5g23940 | EMB3009 (EMBRYO DEFECTIVE 3009); Transferase                                                     |
| P0604E01.8   | Putative Iron Deficiency Protein Ids3          | At2g44800 | Oxidoreductase, 2OG-Fe(II) Oxygenase Family Protein                                              |
| P0605D08.24  | Putative Germin-Like Protein                   | At3g10080 | Germin-Like Protein, Putative                                                                    |
| P0610E02.28  | Hypothetical Protein                           | At1g50660 | Unknown Protein                                                                                  |
| P0610E02.30  | Auxin Efflux Carrier Protein-Like              | At1g71090 | Auxin Efflux Carrier Family Protein                                                              |
| P0610E02.32  | Putative Aconitate Hydratase                   | At2g05710 | Aconitate Hydratase, Cytoplasmic, Putative / Citrate Hydro-Lyase/Aconitase, Putative             |
| P0610E02.33  | Putative Glycinamide Ribonucleotide Synthetase | At1g09830 | Phosphoribosylamine--Glycine Ligase (PUR2)                                                       |
| P0613B07.138 | Putative Plastidic Glucose 6-Phosphate         | At5g13110 | G6PD2 (GLUCOSE-6-PHOSPHATE DEHYDROGENASE 2); Glucose-6-Phosphate 1-Dehydrogenase                 |
| P0613F08.1   | Bet V I Allergen-Like                          | At5g53160 | Unknown Protein                                                                                  |
| P0613F08.20  | Unknown Protein                                | At5g24130 | Unknown Protein                                                                                  |
| P0613F08.9   | Putative Polygalacturonase                     | At4g23820 | Glycoside Hydrolase Family 28 Protein / Polygalacturonase (Pectinase) Family Protein             |
| P0614D08.19  | Hypothetical Protein                           | At3g10140 | Reca Family Protein                                                                              |
| P0614D08.31  | Putative Glucan Endo-1,3-Beta-D-Glucosidase    | At3g23770 | Glycosyl Hydrolase Family 17 Protein                                                             |
| P0616D06.101 | Putative 60S Ribosomal Protein L27a            | At1g23290 | RPL27A (RIBOSOMAL PROTEIN L27A); Structural Constituent Of Ribosome                              |
| P0616D06.103 | Putative Exportin, Trna                        | At1g72560 | Psd (Paused)                                                                                     |
| P0616D06.115 | Unknown Protein                                | At1g19110 | Inter-Alpha-Trypsin Inhibitor Heavy Chain-Related                                                |

|                |                                                 |           |                                                                                                  |
|----------------|-------------------------------------------------|-----------|--------------------------------------------------------------------------------------------------|
| P0616D06.117   | Elongation Factor 1 Beta                        | At1g30230 | Elongation Factor 1-Beta / EF-1-Beta                                                             |
| P0616D06.120   | Putative Ids-4 Protein                          | At2g45130 | SPX (SYG1/Pho81/XPR1) Domain-Containing Protein                                                  |
| P0616D06.127-1 | Putative Oligouridylylate Binding Protein       | At3g14100 | Oligouridylylate-Binding Protein, Putative                                                       |
| P0616D06.132   | Putative RNA Polymerase II Subunit 14.5 Kd      | At3g16980 | DNA-Directed RNA Polymerase II, Putative                                                         |
| P0617A09.16    | Putative Potassium Transporter HAK2p            | At5g14880 | Potassium Transporter, Putative                                                                  |
| P0617A09.20    | Putative Nucellin-Like Aspartic Protease        | At1g49050 | Aspartyl Protease Family Protein                                                                 |
| P0617C02.115   | Kinesin-Related Protein KLPA-Like Protein       | At4g05190 | ATK5 (Arabidopsis Thaliana Kinesin 5); Microtubule Motor                                         |
| P0617C02.122-1 | Unknown Protein                                 | At4g11800 | Calcineurin-Like Phosphoesterase Family Protein                                                  |
| P0617C02.124-2 | Putative Glucose Transport Protein STP1         | At1g11260 | STP1 (SUGAR TRANSPORTER 1); Carbohydrate Transporter/ Sugar Porter                               |
| P0617H07.4     | Putative MRP-Like ABC Transporter               | At3g21250 | ATMRP6 (Arabidopsis Thaliana Multidrug Resistance-Associated Protein 6)                          |
| P0617H07.5     | Putative Pollen Specific Protein SF21           | At5g56750 | Ndr Family Protein                                                                               |
| P0618H09.1     | Putative 60S Ribosomal Protein L22              | At3g05560 | Structural Constituent Of Ribosome                                                               |
| P0618H09.12    | Hypothetical Protein                            | At3g16670 | Unknown Protein                                                                                  |
| P0618H09.15    | Putative Cytoplasmic Ribosomal Protein L18      | At5g27850 | 60S Ribosomal Protein L18 (RPL18C)                                                               |
| P0618H09.21    | Putative Pectinesterase                         | At3g14310 | ATPME3 (Arabidopsis Thaliana Pectin Methyltransferase 3)                                         |
| P0618H09.27    | Putative Tyrosyl-Trna Synthetase                | At1g28350 | ATP Binding / Aminoacyl-Trna Ligase                                                              |
| P0620H05.25    | Putative CLAVATA1 Receptor Kinase               | At5g25930 | Leucine-Rich Repeat Family Protein / Protein Kinase Family Protein                               |
| P0620H05.3     | Putative Pentatricopeptide (PPR)                | At4g31850 | PGR3 (PROTON GRADIENT REGULATION 3); Binding                                                     |
| P0620H05.37    | Putative 40S Ribosomal Protein S24              | At3g04920 | 40S Ribosomal Protein S24 (RPS24A)                                                               |
| P0620H05.9     | Putative Poly(A) Polymerase                     | At4g32850 | Npap (NUCLEAR POLY(A) POLYMERASE); Nucleotidyltransferase                                        |
| P0622F08.20    | Putative Fruit Protein                          | At1g15140 | Oxidoreductase NAD-Binding Domain-Containing Protein                                             |
| P0623F08.33    | Putative Hydroxymethylglutaryl Coenzyme A       | At4g11820 | BAP1 (Hydroxymethylglutaryl-Coa Synthase)                                                        |
| P0623F08.37    | Putative Sorbitol Dehydrogenase                 | At5g51970 | Sorbitol Dehydrogenase, Putative / L-Iditol 2-Dehydrogenase, Putative                            |
| P0623F08.6     | Putative Hydroxyanthranilate                    | At1g31490 | Transferase Family Protein                                                                       |
| P0625E02.103   | Putative Triacylglycerol Lipase                 | At5g18640 | Lipase Class 3 Family Protein                                                                    |
| P0625E02.108-2 | DNA Polymerase Zeta Catalytic Subunit-Like      | At1g67500 | ATREV3 (Arabidopsis Thaliana Recovery Protein 3); DNA Binding                                    |
| P0627E03.1     | Tetratricopeptide Repeat(TPR)-Containing        | At5g65160 | Tetratricopeptide Repeat (TPR)-Containing Protein                                                |
| P0627E03.16    | Putative Toc64                                  | At5g09420 | Chloroplast Outer Membrane Translocon Subunit, Putative                                          |
| P0627E03.18    | Putative Histidine-Trna Ligase                  | At3g46100 | ATHRS1 (HISTIDYL-TRNA SYNTHETASE 1); Histidine-Trna Ligase                                       |
| P0627E03.20    | Disulfide Isomerase                             | At1g34780 | ATAPRL4 (APR-LIKE 4); Electron Carrier/ Protein Disulfide Oxidoreductase                         |
| P0627E03.21    | Putative Early-Responsive To Dehydration Stress | At1g13860 | Dehydration-Responsive Protein-Related                                                           |
| P0627E03.33    | Putative UDP-Glucose Glucosyltransferase1       | At1g22360 | UDP-Glycosyltransferase                                                                          |
| P0627E03.4     | Putative Annexin P35                            | At5g10230 | ANN7 (ANN7, ANNEXIN ARABIDOPSIS 7); Calcium Ion Binding / Calcium-Dependent Phospholipid Binding |
| P0627E03.41    | Putative Phi-1                                  | At4g08950 | Phosphate-Responsive Protein, Putative (EXO)                                                     |

|               |                                                  |           |                                                                                                                                         |
|---------------|--------------------------------------------------|-----------|-----------------------------------------------------------------------------------------------------------------------------------------|
| P0627E10.1    | Putative Phosphoinositide-Specific Phospholipase | At3g08510 | ATPLC2 (PHOSPHOLIPASE C 2); Phospholipase C                                                                                             |
| P0627E10.11   | Putative Prephenate Dehydratase                  | At3g07630 | Prephenate Dehydratase Family Protein                                                                                                   |
| P0627E10.20   | Putative Protein Serine/Threonine Kinase BNK1    | At5g02800 | Protein Kinase Family Protein                                                                                                           |
| P0627E10.26   | Putative 2-Oxoglutarate Dehydrogenase, E1        | At5g65750 | 2-Oxoglutarate Dehydrogenase E1 Component, Putative / Oxoglutarate Decarboxylase, Putative / Alpha-Ketoglutaric Dehydrogenase, Putative |
| P0627E10.6    | Putative Peroxidase                              | At2g37130 | Peroxidase 21 (PER21) (P21) (PRXR5)                                                                                                     |
| P0628H02.1    | Putative Crooked Neck Protein                    | At5g45990 | Crooked Neck Protein, Putative / Cell Cycle Protein, Putative                                                                           |
| P0636F09.3    | Putative Glycogenin                              | At3g18660 | PGSIP1 (PLANT GLYCOGENIN-LIKE STARCH INITIATION PROTEIN 1); Transferase, Transferring Glycosyl Groups                                   |
| P0640E12.105  | Peptidyl-Prolyl Cis-Trans Isomerase              | At3g66654 | Peptidyl-Prolyl Cis-Trans Isomerase Cyclophilin-Type Family Protein                                                                     |
| P0643A10.18   | Putative Avr9/Cf-9 Rapidly Elicited Protein 276  | At3g46510 | Armadillo/Beta-Catenin Repeat Family Protein / U-Box Domain-Containing Family Protein                                                   |
| P0643A10.20   | Unknown Protein                                  | At3g60000 | Unknown Protein                                                                                                                         |
| P0643A10.22   | Putative ADP-Ribosylation Factor                 | At5g37680 | ATARLA1A (ADP-Ribosylation Factor-Like A1A); GTP Binding                                                                                |
| P0643A10.26   | Unknown Protein                                  | At1g23230 | Unknown Protein                                                                                                                         |
| P0643A10.27   | GDSL-Motif Lipase/Hydrolase-Like                 | At1g74460 | GDSL-Motif Lipase/Hydrolase Family Protein                                                                                              |
| P0643A10.28   | Unknown Protein                                  | At5g57930 | Apo2 (Accumulation Of Photosystem One 2)                                                                                                |
| P0643A10.32   | Putative Endo-1,4-Beta-Glucanase                 | At1g70710 | CEL1 (Cellulase 1); Hydrolase, Hydrolyzing O-Glycosyl Compounds                                                                         |
| P0643A10.40   | SET Domain-Containing Protein-Like               | At1g24610 | SET Domain-Containing Protein                                                                                                           |
| P0643A10.49   | Mut/Nudix-Like                                   | At1g73540 | ATNUDT21 (Arabidopsis Thaliana Nudix Hydrolase Homolog 21); Hydrolase                                                                   |
| P0643A10.51   | Putative Caleosin                                | At1g70670 | Caleosin-Related Family Protein                                                                                                         |
| P0643A10.55   | 33 Kda Secretory Protein-Like                    | At5g41280 | Unknown Protein                                                                                                                         |
| P0643D11.18   | Unknown Protein                                  | At3g47610 | Transcription Regulator/ Zinc Ion Binding                                                                                               |
| P0643F09.13   | Haloacid Dehalogenase-Like Hydrolase-Like        | At2g33250 | Unknown Protein                                                                                                                         |
| P0643F09.20   | ABC1-Like                                        | At3g24190 | ABC1 Family Protein                                                                                                                     |
| P0643F09.23   | Putative NADH Dehydrogenase                      | At2g20360 | Catalytic/ Coenzyme Binding                                                                                                             |
| P0643F09.26   | Putative Myosin Subfamily XI Heavy Chain         | At5g43900 | Mya2 (Arabidopsis Myosin)                                                                                                               |
| P0643F09.32   | Putative Arp2/3 Complex 41kd Subunit             | At2g31300 | ARPC1b (Actin-Related Protein C1b); Nucleotide Binding                                                                                  |
| P0643F09.35   | Putative Potassium Channel Beta Subunit          | At1g04690 | KAB1 (POTASSIUM CHANNEL BETA SUBUNIT); Potassium Channel                                                                                |
| P0643F09.4    | Alcohol Dehydrogenase Class III                  | At5g43940 | ADH2 (ALCOHOL DEHYDROGENASE 2); Formaldehyde Dehydrogenase (Glutathione)                                                                |
| P0643F09.5    | Diphthamide Synthesis DPH2-Like                  | At5g62030 | Diphthamide Synthesis DPH2 Family Protein                                                                                               |
| P0643F09.7    | Exoribonuclease-Like                             | At5g38890 | Exoribonuclease-Related                                                                                                                 |
| P0644G05.16   | Unknown Protein                                  | At3g60900 | FLA10 (Fasciclin-Like Arabinogalactan-Protein 10)                                                                                       |
| P0644G05.33   | Hypothetical Protein                             | At3g16720 | ATL2 (Arabidopsis T?Xicos En Levadura 2); Protein Binding / Zinc Ion Binding                                                            |
| P0645D04.22-1 | Putative Ras-Related Protein RGP1                | At5g47960 | SMG1 (SMALL MOLECULAR WEIGHT G-PROTEIN 1); GTP Binding                                                                                  |
| P0646B04.11   | Cyclase-Like Protein                             | At1g44542 | Cyclase Family Protein                                                                                                                  |
| P0646B04.12   | Putative DNA-Directed RNA Polymerase II          | At2g15430 | RBP36A (RNA Polymerase II 36 Kda Polypeptide A); DNA Binding / DNA-Directed RNA                                                         |



|                |                                             |           |                                                                                      |
|----------------|---------------------------------------------|-----------|--------------------------------------------------------------------------------------|
| P0646B04.51    | Putative Avr9/Cf-9 Rapidly Elicited Protein | At1g47056 | Polymerase                                                                           |
| P0646B04.7     | Putative Receptor-Like Kinase RHG1          | At2g23300 | VFB1 (VIER F-BOX PROTEINE 1); Ubiquitin-Protein Ligase                               |
| P0646B04.9     | PPR Protein-Like Protein                    | At1g79540 | Leucine-Rich Repeat Transmembrane Protein Kinase, Putative                           |
| P0650H04.11    | Putative Cinnamyl Alcohol Dehydrogenase     | At4g37980 | Pentatricopeptide (PPR) Repeat-Containing Protein                                    |
| P0650H04.32    | Putative White Pigment Protein              | At2g39350 | ELI3-1 (ELICITOR-ACTIVATED GENE 3); Oxidoreductase/ Zinc Ion Binding                 |
| P0651G05.38    | Putative Fiber Protein Fb34                 | At1g13380 | ABC Transporter Family Protein                                                       |
| P0654A08.41    | Putative Cytochrome P450 Monooxygenase      | At2g30750 | Unknown Protein                                                                      |
| P0654B04.16-2  | WD-40 Repeat Protein-Like                   | At3g13340 | CYP71A12 (Cytochrome P450, Family 71, Subfamily A, Polypeptide 12); Oxygen Binding   |
| P0654B04.19    | Putative Phosphatidylinositol Transfer      | At1g55690 | WD-40 Repeat Family Protein                                                          |
| P0654B04.3     | Putative Chloroplast Nucleoid DNA-Binding   | At5g10770 | SEC14 Cytosolic Factor Family Protein / Phosphoglyceride Transfer Family Protein     |
| P0654B04.31    | Putative Zinc Finger And C2 Domain Protein  | At4g05330 | Chloroplast Nucleoid DNA-Binding Protein, Putative                                   |
| P0654B04.5     | Putative Chloride Channel Protein           | At1g55620 | Agd13 (Arf-Gap Domain 13)                                                            |
| P0656C04.104-1 | Unknown Protein                             | At3g05000 | CLC-F (CHLORIDE CHANNEL F); Voltage-Gated Chloride Channel                           |
| P0656C04.124   | Putative 60S Ribosomal Protein L30          | At2g44860 | Transport Protein Particle (TRAPP) Component Bet3 Family Protein                     |
| P0657H12.1     | Aluminum-Activated Malate Transporter-Like  | At1g08440 | 60S Ribosomal Protein L24, Putative                                                  |
| P0657H12.28    | GL2-Type Homeobox Genes                     | At3g61150 | Unknown Protein                                                                      |
| P0660F12.13    | Hypothetical Protein                        | At1g07130 | HDG1 (HOMEODOMAIN GLABROUS1); DNA Binding / Transcription Factor                     |
| P0660F12.17    | Putative Beta 1,3-Glucanase                 | At5g42720 | OB-Fold Nucleic Acid Binding Domain-Containing Protein                               |
| P0660F12.24    | Unknown Protein                             | At2g01170 | Glycosyl Hydrolase Family 17 Protein                                                 |
| P0663C08.12    | Unknown Protein                             | At5g12010 | Amino Acid Permease Family Protein                                                   |
| P0663C08.13    | Putative Vacuolar ATP Synthase Subunit C    | At1g12840 | Unknown Protein                                                                      |
| P0663C08.15    | Putative Protein Kinase ADK1                | At1g72710 | Det3 (De-Etiolated 3)                                                                |
| P0663C08.2     | Unknown Protein                             | At5g28540 | Casein Kinase, Putative                                                              |
| P0663C08.5     | Putative Hypersensitive-Induced Response    | At5g62740 | Luminal Binding Protein 1 (Bip-1) (BP1)                                              |
| P0663C08.7     | Unknown Protein                             | At1g49970 | Band 7 Family Protein                                                                |
| P0663C08.8     | Putative DNA Damage Binding Protein 1       | At4g05420 | CLPR1 (Clp Protease Proteolytic Subunit 5); Endopeptidase Clp                        |
| P0663C08.9     | Unknown Protein                             | At2g28360 | DDB1A (UV-Damaged DNA-Binding Protein 1A); DNA Binding                               |
| P0663E10.7     | Putative Transcription Factor X1            | At1g15910 | SIT4 Phosphatase-Associated Family Protein                                           |
| P0663F07.1     | SPX (SYG1/Pho81/XPR1) Domain-Containing     | At1g63010 | XH/XS Domain-Containing Protein / XS Zinc Finger Domain-Containing Protein           |
| P0663F07.14    | Pentatricopeptide (PPR) Repeat-Containing   | At1g74900 | SPX (SYG1/Pho81/XPR1) Domain-Containing Protein                                      |
| P0663F07.33    | Fringe-Related Protein-Like                 | At5g41460 | Pentatricopeptide (PPR) Repeat-Containing Protein                                    |
| P0663F07.43    | Putative Serine/Threonine-Specific Protein  | At2g33580 | Fringe-Related Protein                                                               |
| P0663F07.5     | Dtdp-D-Glucose 4,6-Dehydratase-Like         | At1g63000 | Protein Kinase Family Protein / Peptidoglycan-Binding Lysm Domain-Containing Protein |
| P0665A11.10    | Hypothetical Protein                        | At3g49200 | Nrs/Er (Nucleotide-Rhamnose Synthase/Epimerase-Reductase)                            |
|                |                                             |           | Unknown Protein                                                                      |

|               |                                                  |           |                                                                                        |
|---------------|--------------------------------------------------|-----------|----------------------------------------------------------------------------------------|
| P0665A11.26   | Putative Ubiquitin Carboxyl-Terminal Hydrolase   | At3g11910 | Ubiquitin-Specific Protease, Putative                                                  |
| P0665A11.3    | Hypothetical Protein                             | At3g22270 | Unknown Protein                                                                        |
| P0665A11.6    | Putative Serine Proteinase                       | At4g20430 | Subtilase Family Protein                                                               |
| P0665A11.7    | Putative Receptor-Protein Kinase                 | At3g51550 | Protein Kinase Family Protein                                                          |
| P0665C04.29   | Putative Ubiquitin-Specific Protease Otubain 1   | At1g28120 | Unknown Protein                                                                        |
| P0665C04.3    | PHO85-Like Protein                               | At3g02040 | SRG3 (SENESCENCE-RELATED GENE 3); Glycerophosphodiester Phosphodiesterase              |
| P0665C04.30   | AP2 Domain-Containing Protein AP29-Like          | At1g52630 | Unknown Protein                                                                        |
| P0665C04.32   | Putative Glycyl-Trna Synthetase                  | At1g29880 | Glycyl-Trna Synthetase / Glycine--Trna Ligase                                          |
| P0665D10.14   | Unknown Protein                                  | At5g04560 | Encodes A DNA Glycosylase DEMETER (DME)                                                |
| P0665D10.18   | Unknown Protein                                  | At1g65480 | Ft (Flowering Locus T)                                                                 |
| P0665D10.20   | Putative Phophatidylethanolamine Binding         | At5g16880 | VHS Domain-Containing Protein / GAT Domain-Containing Protein                          |
| P0666E12.11   | Putative Target Of Myb1                          | At3g04090 | Sip1;1 (Small And Basic Intrinsic Protein 1a)                                          |
| P0666G04.16   | Unknown Protein                                  | At1g79930 | HSP91 (Heat Shock Protein 91)                                                          |
| P0666G10.104  | Putative Retinoblastoma Protein                  | At3g12280 | Rbr1 (Retinoblastoma-Related 1)                                                        |
| P0666G10.106  | Putative Pentatricopeptide (PPR)                 | At3g12770 | Pentatricopeptide (PPR) Repeat-Containing Protein                                      |
| P0666G10.108  | Putative DHHC-Type Zinc Finger Domain-Containing | At3g48760 | Zinc Finger (DHHC Type) Family Protein                                                 |
| P0666G10.131  | Putative Anthocyanin-Related Membrane Protein 1  | At3g59310 | Unknown Protein                                                                        |
| P0666G10.132  | Putative Biotin Synthase                         | At2g43360 | BIO2 (BIOTIN AUXOTROPH 2); Biotin Synthase                                             |
| P0668C05.107  | Transducin /WD-40 Repeat Protein Family-Like     | At2g47990 | SWA1 (SLOW WALKER1); Nucleotide Binding                                                |
| P0668C05.111  | Osnac3 Protein                                   | At5g63790 | ANAC102 (Arabidopsis NAC Domain Containing Protein 102); Transcription Factor          |
| P0668H12.10   | Putative Ankyrin Protein                         | At3g04710 | Binding                                                                                |
| P0668H12.19   | Putative 26S Proteasome Regulatory Subunit       | At2g39990 | EIF2 (Eukaryotic Translation Initiation Factor 2); Translation Initiation Factor       |
| P0668H12.20   | Putative Methionine S-Methyltransferase (EC      | At5g49810 | MMT (Methionine S-Methyltransferase); S-Adenosylmethionine-Dependent Methyltransferase |
| P0668H12.21   | Putative GTP-Binding Protein                     | At1g09630 | ATRAB11C (ARABIDOPSIS RAB GTPASE HOMOLOG A2A); GTP Binding                             |
| P0668H12.7    | Unknown Protein                                  | At3g27030 | Unknown Protein                                                                        |
| P0669G09.11   | Putative GDP-Fucose                              | At3g05320 | Unknown Protein                                                                        |
| P0669G09.12   | Unknown Protein                                  | At3g02070 | OTU-Like Cysteine Protease Family Protein                                              |
| P0669G09.15-2 | Putative Porphobilinogen Deaminase               | At5g08280 | HEMC (HYDROXYMETHYLBILANE SYNTHASE); Hydroxymethylbilane Synthase                      |
| P0669G09.17   | Unknown Protein                                  | At1g56180 | Unknown Protein                                                                        |
| P0669G09.19   | Putative Phosphoglycerate Kinase, Cytosolic      | At1g79550 | Pgk (Phosphoglycerate Kinase)                                                          |
| P0669G09.32   | Putative Inositol-1-Monophosphatase              | At1g31190 | Inositol Monophosphatase Family Protein                                                |
| P0669G09.6    | Putative 4-Hydroxyphenylpyruvate Dioxygenase     | At1g06570 | Pds1 (Phytoene Desaturation 1)                                                         |
| P0669G10.5-1  | Putative Protein Kinase ADK1                     | At5g43320 | CKL8 (Casein Kinase I-Like 8); Casein Kinase II Kinase                                 |
| P0669G10.7    | Putative Glyoxalase I                            | At1g67280 | Lactoylglutathione Lyase, Putative / Glyoxalase I, Putative                            |

|              |                                                 |           |                                                                                                                                     |
|--------------|-------------------------------------------------|-----------|-------------------------------------------------------------------------------------------------------------------------------------|
| P0669G10.9   | Putative Iron/Ascorbate-Dependent               | At5g20400 | Oxidoreductase, 2OG-Fe(II) Oxygenase Family Protein                                                                                 |
| P0669H03.9   | Putative Cellulose Synthase-8                   | At4g39350 | CESA2 (CELLULASE SYNTHASE 2); Cellulose Synthase/ Transferase, Transferring Glycosyl Groups                                         |
| P0670E08.10  | Putative Polygalacturonase                      | At4g18180 | Glycoside Hydrolase Family 28 Protein / Polygalacturonase (Pectinase) Family Protein                                                |
| P0670E08.9   | Putative Glycosyltransferase                    | At5g47780 | GAUT4 (Galacturonosyltransferase 4); Polygalacturonate 4-Alpha-Galacturonosyltransferase/ Transferase, Transferring Glycosyl Groups |
| P0671B11.20  | Putative 1-Aminocyclopropane-1-Carboxylic Acid  | At4g26200 | ACS7 (1-Amino-Cyclopropane-1-Carboxylate Synthase 7); 1-Aminocyclopropane-1-Carboxylate Synthase                                    |
| P0671B11.35  | Putative Regulatory Protein NPR1                | At1g64280 | NPR1 (NONEXPRESSER OF PR GENES 1); Protein Binding                                                                                  |
| P0671D01.17  | Putative Nifu-Like Protein                      | At3g01020 | ATISU2/ISU2 (Iscu-Like 2); Structural Molecule                                                                                      |
| P0671D01.24  | Putative Mannan Endo-1,4-Beta-Mannosidase       | At5g66460 | (1-4)-Beta-Mannan Endohydrolase, Putative                                                                                           |
| P0671D01.25  | Putative Aspartic Protease                      | At4g04460 | Aspartyl Protease Family Protein                                                                                                    |
| P0671D01.4   | Hypothetical Protein                            | At3g12470 | Nucleic Acid Binding                                                                                                                |
| P0671F11.27  | Putative 2-Oxoglutarate-Dependent Oxygenase     | At2g30830 | 2-Oxoglutarate-Dependent Dioxygenase, Putative                                                                                      |
| P0672C09.17  | Putative Beta-Galactosidase                     | At3g13750 | BGAL1 (BETA GALACTOSIDASE 1); Beta-Galactosidase                                                                                    |
| P0672C09.22  | Putative 1-Aminocyclopropane-1-Carboxylate      | At2g19590 | ACO1 (ACC OXIDASE 1); 1-Aminocyclopropane-1-Carboxylate Oxidase                                                                     |
| P0672D01.114 | Putative RNA Helicase                           | At1g20920 | DEAD Box RNA Helicase, Putative                                                                                                     |
| P0672D01.115 | Unknown Protein                                 | At3g02950 | Unknown Protein                                                                                                                     |
| P0672D08.18  | Hypothetical Protein                            | At3g48610 | Phosphoesterase Family Protein                                                                                                      |
| P0672D08.27  | Hypothetical Protein                            | At5g13100 | Oxidoreductase                                                                                                                      |
| P0672D08.30  | Putative DNA Repair And Recombination Protein   | At2g18760 | CHR8 (Chromatin Remodeling 8); ATP Binding / DNA Binding / Helicase                                                                 |
| P0672D08.33  | Hypothetical Protein                            | At3g10640 | SNF7 Family Protein                                                                                                                 |
| P0672D08.4   | Hypothetical Protein                            | At5g16520 | Unknown Protein                                                                                                                     |
| P0672D08.5   | Putative 40S Ribosomal Protein S5               | At2g37270 | ATRPS5B (RIBOSOMAL PROTEIN 5B); Structural Constituent Of Ribosome                                                                  |
| P0672D08.7   | Putative Sphingosine-1-Phosphate Lyase          | At1g27980 | Pyridoxal-Dependent Decarboxylase Family Protein                                                                                    |
| P0673E01.19  | Putative SNF2 Domain/Helicase Domain-Containing | At2g16390 | DRD1 (DEFECTIVE IN RNA-DIRECTED DNA METHYLATION 1); ATP Binding / DNA Binding / Helicase/ Nucleic Acid Binding                      |
| P0673E01.23  | 26S Proteasome Regulatory Particle Non-Atpase   | At1g64520 | 26S Proteasome Regulatory Subunit, Putative (RPN12)                                                                                 |
| P0674H09.13  | Hypothetical Protein                            | At5g48340 | Unknown Protein                                                                                                                     |
| P0674H09.17  | Putative Beta-Glucosidase                       | At5g36890 | Hydrolase, Hydrolyzing O-Glycosyl Compounds                                                                                         |
| P0674H09.28  | Patatin-Like Protein                            | At4g37050 | PLA V/PLP4 (Patatin-Like Protein 4); Nutrient Reservoir                                                                             |
| P0676F10.11  | Unknown Protein                                 | At5g03740 | HD2C (HISTONE DEACETYLASE 2C); Nucleic Acid Binding / Zinc Ion Binding                                                              |
| P0676F10.14  | Unknown Protein                                 | At5g08180 | Ribosomal Protein L7Ae/L30e/S12e/Gadd45 Family Protein                                                                              |
| P0676F10.33  | Putative Curly Leaf Protein                     | At2g23380 | CLF (CURLY LEAF); Transcription Factor                                                                                              |
| P0676F10.7   | Unknown Protein                                 | At5g15890 | Unknown Protein                                                                                                                     |
| P0676G05.12  | Putative RNA Polymerase II Fifth Largest        | At4g14660 | RNA Polymerase Rpb7 N-Terminal Domain-Containing Protein                                                                            |
| P0676G05.13  | Unknown Protein                                 | At3g17020 | Universal Stress Protein (USP) Family Protein                                                                                       |

|               |                                              |           |                                                                                                   |
|---------------|----------------------------------------------|-----------|---------------------------------------------------------------------------------------------------|
| P0676G05.6    | Putative Disulfide Isomerase                 | At2g47470 | ATPDIL2-1/MEE30/UNE5 (PDI-LIKE 2-1, Maternal Effect Embryo Arrest 30, Unfertilized Embryo Sac 5)  |
| P0676G05.7    | Unknown Protein                              | At3g62600 | DNAJ Heat Shock Family Protein                                                                    |
| P0676G05.8    | Putative Tubulin Gamma-2 Chain (Gamma-2)     | At3g61650 | TUBG1 (GAMMA-TUBULIN); Structural Molecule                                                        |
| P0676G05.9    | Putative Dihydrolipoamide Dehydrogenase      | At3g16950 | Lpd1 (Lipoamide Dehydrogenase 1)                                                                  |
| P0676H02.1    | Putative Glutathione S-Transferase           | At3g09270 | ATGSTU8 (Arabidopsis Thaliana Glutathione S-Transferase (Class Tau) 8); Glutathione Transferase   |
| P0676H02.3    | Putative Purine Permease                     | At1g28220 | ATPUP3 (Arabidopsis Thaliana Purine Permease 3); Purine Transporter                               |
| P0676H02.31-1 | Putative Isoamylase-Type Starch Debranching  | At4g09020 | ATISA3/ISA3 (ISOAMYLASE 3); Alpha-Amylase                                                         |
| P0676H02.7    | Putative Ripening Regulated Protein DDTFR18  | At5g65380 | Ripening-Responsive Protein, Putative                                                             |
| P0676H03.17   | Putative Cytochrome B5 Reductase             | At5g17770 | Atcbr (Nadh:Cytochrome B5 Reductase 1)                                                            |
| P0676H03.26   | Unknown Protein                              | At1g52890 | ANAC019 (Arabidopsis NAC Domain Containing Protein 19); Transcription Factor                      |
| P0676H03.28   | Putative Microtubule Associated Protein      | At2g35630 | Mor1 (Microtubule Organization 1)                                                                 |
| P0676H03_3    | ADP-Ribosylation Factor                      | At2g47170 | ARF1A1c (ADP-RIBOSYLATION FACTOR 1); GTP Binding / Phospholipase Activator/ Protein Binding       |
| P0677G01.47   | Avr9/Cf-9 Rapidly Elicited Protein-Like      | At3g07360 | Armadillo/Beta-Catenin Repeat Family Protein / U-Box Domain-Containing Protein                    |
| P0677H08.18   | Putative Subtilisin-Like Protease            | At1g01900 | Subtilase Family Protein                                                                          |
| P0677H08.24   | Unknown Protein                              | At1g21790 | Unknown Protein                                                                                   |
| P0678F11.2    | Ubiquitin-Like Protein                       | At5g55160 | Sum2 (Small Ubiquitin-Like Modifier 2)                                                            |
| P0678F11.21   | Hypothetical Protein                         | At1g65320 | CBS Domain-Containing Protein                                                                     |
| P0679C08.10   | Unknown Protein                              | At5g42090 | Unknown Protein                                                                                   |
| P0679C08.19   | Rice Waxy Protein                            | At1g32900 | Starch Synthase, Putative                                                                         |
| P0679C08.26   | Unknown Protein                              | At5g51550 | Phosphate-Responsive 1 Family Protein                                                             |
| P0679C08.28   | Putative Transketolase                       | At2g45290 | Transketolase, Putative                                                                           |
| P0679C08.29   | 3-Phosphoshikimate 1-Carboxyvinyltransferase | At2g45300 | 3-Phosphoshikimate 1-Carboxyvinyltransferase / 5-Enolpyruvylshikimate-3-Phosphate / EPSP Synthase |
| P0679C08.30   | 40S Ribosomal Protein S20                    | At5g62300 | 40S Ribosomal Protein S20 (RPS20C)                                                                |
| P0679C08.31   | Unknown Protein                              | At2g45330 | EMB1067 (EMBRYO DEFECTIVE 1067); Trna 2'-Phosphotransferase                                       |
| P0679C12.16   | Putative Beta-1,3-Glucanase                  | At1g32860 | Glycosyl Hydrolase Family 17 Protein                                                              |
| P0679C12.26   | Hypothetical Protein                         | At3g52570 | Unknown Protein                                                                                   |
| P0679C12.4    | Hypothetical Protein                         | At1g67190 | F-Box Family Protein                                                                              |
| P0680A05.37   | Putative Hydrolase                           | At4g36610 | Hydrolase, Alpha/Beta Fold Family Protein                                                         |
| P0680A05.39   | Putative Cytosolic Monodehydroascorbate      | At3g27820 | ATMDAR4 (MONODEHYDROASCORBATE REDUCTASE 4); Monodehydroascorbate Reductase (NADH)                 |
| P0680F05.36   | Phosphate/Phosphoenolpyruvate Translocator   | At3g14410 | Transporter-Related                                                                               |
| P0680F05.38   | Copine I-Like Protein                        | At1g79380 | Copine-Related                                                                                    |
| P0680F05.45   | Putative Tryptophan Synthase Beta-Subunit    | At4g27070 | TSB2 (TRYPTOPHAN SYNTHASE BETA-SUBUNIT); Tryptophan Synthase                                      |

|                |                                              |           |                                                                                                                                                                          |
|----------------|----------------------------------------------|-----------|--------------------------------------------------------------------------------------------------------------------------------------------------------------------------|
| P0680F05.51    | Putative 33-Kda Secretory Protein            | At1g63600 | Protein Kinase-Related                                                                                                                                                   |
| P0681B11.1     | Putative Protein Kinase APK1B                | At3g13690 | Protein Kinase Family Protein                                                                                                                                            |
| P0681B11.19    | Unknown Protein                              | At3g02420 | Unknown Protein                                                                                                                                                          |
| P0681F05.106-2 | Putative Thiamine Biosynthesis Protein       | At5g54770 | Thi1 (Thiazole Requiring)                                                                                                                                                |
| P0681F05.108-1 | Putative Endoxyloglucan Transferase          | At5g13870 | EXGT-A4 (ENDOXYLOGLUCAN TRANSFERASE A4); Hydrolase, Acting On Glycosyl Bonds                                                                                             |
| P0681F05.108-2 | Xyloglucan Endotransglycosylase-Like Protein | At3g44990 | XTR8 (Xyloglucan:Xyloglucosyl Transferase 8); Hydrolase, Acting On Glycosyl Bonds                                                                                        |
| P0681F05.120   | Putative ATP/GTP-Binding Protein             | At4g21210 | Encodes A PPK Regulatory Protein That Has Both Protein Kinase And Protein Phosphatase Activities Towards PPK (Pyruvate Orthophosphate Dikinase).<br>Peroxidase, Putative |
| P0681F05.131-1 | Putative Peroxidase                          | At4g11290 | Peroxidase, Putative                                                                                                                                                     |
| P0681F05.132   | Hypothetical Protein                         | At4g05220 | Harpin-Induced Protein-Related / HIN1-Related / Harpin-Responsive Protein-Related                                                                                        |
| P0681F05.133   | Putative 1-Acyl-Sn-Glycerol-3-Phosphate      | At5g60620 | Phospholipid/Glycerol Acyltransferase Family Protein                                                                                                                     |
| P0682A06.20    | Putative GDP-Mannose Pyrophosphorylase       | At2g39770 | CYT1 (CYTOKINESIS DEFECTIVE 1); Nucleotidyltransferase                                                                                                                   |
| P0682A06.39    | Putative Endo-1,3                            | At3g23600 | Hydrolase                                                                                                                                                                |
| P0682B08.20    | Hypothetical Protein                         | At1g02370 | Pentatricopeptide (PPR) Repeat-Containing Protein                                                                                                                        |
| P0682B08.6     | Putative ATP Citrate Lyase                   | At5g49460 | ACLB-2 (ATP-Citrate Lyase B-2)                                                                                                                                           |
| P0682B08.8     | Putative Pm5 Collagenase                     | At3g62360 | Unknown Protein                                                                                                                                                          |
| P0683B11.11    | Putative Embryonic Abundant Protein-Like     | At5g10830 | Embryo-Abundant Protein-Related                                                                                                                                          |
| P0683B11.24    | Putative Alliinase                           | At1g34060 | Alliinase Family Protein                                                                                                                                                 |
| P0683B11.27    | Hypothetical Protein                         | At3g12630 | Zinc Finger (AN1-Like) Family Protein                                                                                                                                    |
| P0683F02.10    | Putative G10 Protein                         | At4g21110 | G10 Family Protein                                                                                                                                                       |
| P0683F02.14    | Putative Cytochrome P450                     | At2g27690 | CYP94C1 (Cytochrome P450, Family 94, Subfamily C, Polypeptide 1); Oxygen Binding                                                                                         |
| P0683F02.2     | Hypothetical Protein                         | At5g05710 | Pleckstrin Homology (PH) Domain-Containing Protein                                                                                                                       |
| P0683F02.22    | Unknown Protein                              | At3g48410 | Hydrolase, Alpha/Beta Fold Family Protein                                                                                                                                |
| P0683F02.6     | Putative 3-Deoxy-D-Manno-Octulosonic-Acid    | At5g03770 | 3-Deoxy-D-Manno-Octulosonic Acid Transferase-Related                                                                                                                     |
| P0683F02.7     | Unknown Protein                              | At1g48640 | Lysine And Histidine Specific Transporter, Putative                                                                                                                      |
| P0683F02.8     | Putative Permease 1                          | At4g38050 | Permease                                                                                                                                                                 |
| P0683F12.13    | Putative Phosphatidylinositol-Specific       | At3g55940 | Phosphoinositide-Specific Phospholipase C, Putative                                                                                                                      |
| P0683F12.15    | Putative Dnaj                                | At3g08910 | DNAJ Heat Shock Protein, Putative                                                                                                                                        |
| P0683F12.16    | Putative Leucoanthocyanidin Dioxygenase (EC  | At3g11180 | Oxidoreductase, 2OG-Fe(II) Oxygenase Family Protein                                                                                                                      |
| P0683F12.6     | Putative Senescence-Associated Protein       | At3g12090 | Tet6 (Tetraspanin6)                                                                                                                                                      |
| P0684A08.22    | Putative Bzip Protein                        | At4g35240 | Unknown Protein                                                                                                                                                          |
| P0684A08.25    | Unknown Protein                              | At5g43800 | Transposable Element Gene                                                                                                                                                |
| P0684A08.36    | Putative Amino Acid Transport Protein        | At4g38250 | Amino Acid Transporter Family Protein                                                                                                                                    |
| P0684B02.1     | Putative Clathrin-Associated Protein         | At1g60780 | Clathrin Adaptor Complexes Medium Subunit Family Protein                                                                                                                 |
| P0684B02.7     | Putative High Affinity Nitrate Transporter   | At1g12940 | ATNRT2.5 (NITRATE TRANSPORTER2.5); Nitrate Transporter                                                                                                                   |

|               |                                                  |           |                                                                                                                                                                                          |
|---------------|--------------------------------------------------|-----------|------------------------------------------------------------------------------------------------------------------------------------------------------------------------------------------|
| P0684C01.11   | Unknown Protein                                  | At1g15010 | Unknown Protein                                                                                                                                                                          |
| P0684C01.4    | Putative Eukaryotic Translation Initiation       | At4g11420 | EIF3A (Eukaryotic Translation Initiation Factor 3A)                                                                                                                                      |
| P0684C02.14   | Putative Retrotransposon Polyprotein             | At1g21945 | Transposable Element Gene; Copia-Like Retrotransposon Family,                                                                                                                            |
| P0684C02.5    | Unknown Protein                                  | At4g27020 | Unknown Protein                                                                                                                                                                          |
| P0684E06.22   | Acidic Class III Chitinase Oschib3a              | At5g24090 | Acidic Endochitinase (CHIB1)                                                                                                                                                             |
| P0684E06.23   | Putative Pyruvate Kinase                         | At5g52920 | Pyruvate Kinase, Putative                                                                                                                                                                |
| P0684E06.8    | Putative YLP                                     | At1g64200 | VHA-E3 (VACUOLAR H <sup>+</sup> -ATPASE SUBUNIT E ISOFORM 3); Hydrogen Ion Transporting ATP Synthase, Rotational Mechanism / Hydrogen Ion Transporting Atpase, Rotational Mechanism      |
| P0684F11.15   | Putative Dynamin Homolog                         | At1g59610 | Adl3 (Arabidopsis Dynamin-Like 3)                                                                                                                                                        |
| P0684F11.16   | Putative Helicase                                | At1g70070 | PDE317 (PIGMENT DEFECTIVE 317); ATP-Dependent Helicase                                                                                                                                   |
| P0684F11.2    | Putative Immediate-Early Fungal Elicitor Protein | At5g37490 | U-Box Domain-Containing Protein                                                                                                                                                          |
| P0684F11.21   | Putative Avr9/Cf-9 Rapidly Elicited Protein 231  | At1g70090 | GATL9/LGT8 (Galacturonosyltransferase-Like 9); Polygalacturonate 4-Alpha-Galacturonosyltransferase/ Transferase, Transferring Glycosyl Groups / Transferase, Transferring Hexosyl Groups |
| P0684F11.25   | Putative Pyruvate Dehydrogenase E1 Alpha         | At1g59900 | AT-E1 ALPHA (Pyruvate Dehydrogenase Complex E1 Alpha Subunit); Pyruvate Dehydrogenase (Acetyl-Transferring)                                                                              |
| P0685G12.19   | Putative SNF5 Homolog BSH (Bsh)                  | At3g17590 | BSH (Bushy Growth)                                                                                                                                                                       |
| P0685G12.41   | Sucrase-Like Protein                             | At5g55900 | Sucrase-Related                                                                                                                                                                          |
| P0685G12.43   | Putative Ribulose-1,5-Bisphosphate               | At3g07670 | SET Domain-Containing Protein                                                                                                                                                            |
| P0685G12.44-1 | Cellulose Synthase-Like Protein Oscsle2          | At1g55850 | ATCSLE1 (Cellulose Synthase-Like E1); Cellulose Synthase/ Transferase, Transferring Glycosyl Groups                                                                                      |
| P0686C03.126  | Unknown Protein                                  | At4g38160 | Pde191 (Pigment Defective 191)                                                                                                                                                           |
| P0686E09.12   | Putative CTP Synthase                            | At3g12670 | EMB2742 (EMBRYO DEFECTIVE 2742); CTP Synthase                                                                                                                                            |
| P0686E09.16   | Unknown Protein                                  | At1g80410 | EMB2753 (EMBRYO DEFECTIVE 2753); Binding                                                                                                                                                 |
| P0686H11.17   | Zinc Finger Protein Family-Like                  | At2g04240 | XERICO; Protein Binding / Zinc Ion Binding                                                                                                                                               |
| P0686H11.30   | Putative Receptor Protein Kinase                 | At5g56040 | ATP Binding / Protein Serine/Threonine Kinase                                                                                                                                            |
| P0686H11.31   | Putative Signal Transducer And Activator Of      | At1g49540 | Nucleotide Binding                                                                                                                                                                       |
| P0686H11.32   | Unknown Protein                                  | At5g56050 | Unknown Protein                                                                                                                                                                          |
| P0686H11.35   | Copine I-Like                                    | At5g14420 | Copine-Related                                                                                                                                                                           |
| P0688A04.10   | Putative Cytochrome P450                         | At3g14690 | CYP72A15 (Cytochrome P450, Family 72, Subfamily A, Polypeptide 15); Oxygen Binding                                                                                                       |
| P0688A04.27   | Putative Cytochrome P450                         | At3g14650 | CYP72A11 (Cytochrome P450, Family 72, Subfamily A, Polypeptide 11); Oxygen Binding                                                                                                       |
| P0688A04.29   | Hypothetical Protein                             | At5g10060 | Unknown Protein                                                                                                                                                                          |
| P0688A04.9    | Putative Cytochrome P450                         | At3g14660 | CYP72A13 (Cytochrome P450, Family 72, Subfamily A, Polypeptide 13); Oxygen Binding                                                                                                       |
| P0688H12.36   | Nuclear Protein-Like                             | At1g25682 | Cell Cycle Control Protein-Related                                                                                                                                                       |
| P0689E12.19   | Putative Stress Related-Like Protein Interactor  | At2g24420 | DNA Repair Atpase-Related                                                                                                                                                                |
| P0689E12.34   | Putative Ribosomal Large Subunit Pseudouridine   | At1g78910 | Pseudouridine Synthase Family Protein                                                                                                                                                    |
| P0689H05.20   | Putative Ent-Kaurene Synthase B                  | At1g79460 | GA2 (GA REQUIRING 2); Ent-Kaurene Synthase                                                                                                                                               |

|             |                                                |           |                                                                                              |
|-------------|------------------------------------------------|-----------|----------------------------------------------------------------------------------------------|
| P0690B02.26 | S-Adenosylmethionine:2-Demethylmenaquinone     | At5g16450 | Dimethylmenaquinone Methyltransferase Family Protein                                         |
| P0690B02.4  | Unknown Protein                                | At1g73010 | Phosphoric Monoester Hydrolase                                                               |
| P0690B02.7  | Putative Serine Acetyltransferase              | At5g56760 | Atserat1;1 (SERINE ACETYLTRANSFERASE 52); Serine O-Acetyltransferase                         |
| P0690E03.3  | Putative 12-Oxophytodienoate Reductase         | At2g06050 | Opr3 (Opda-Reductase 3)                                                                      |
| P0690E03.8  | Germin-Like Protein                            | At1g72610 | GLP1 (GERMIN-LIKE PROTEIN 1); Manganese Ion Binding / Metal Ion Binding / Nutrient Reservoir |
| P0691E06.15 | Putative Latex-Abundant Protein                | At1g79340 | Latex-Abundant Protein, Putative (AMC7) / Caspase Family Protein                             |
| P0691E06.20 | Unknown Protein                                | At5g44860 | Unknown Protein                                                                              |
| P0691E06.21 | PPR-Repeat Protein -Like                       | At5g15300 | Pentatricopeptide (PPR) Repeat-Containing Protein                                            |
| P0691E06.27 | Putative Exodeoxyribonuclease                  | At2g41460 | ARP (Apurinic Endonuclease-Redox Protein)                                                    |
| P0691F12.18 | Putative Pectinesterase 2.1 Precursor          | At4g33220 | Pectinesterase Family Protein                                                                |
| P0692C11.26 | Putative Vesicle Transport V-SNARE Protein     | At3g29100 | VTI13 (Vesicle Transport V-SNARE 13); SNARE Binding / Receptor                               |
| P0692C11.3  | WSI18 Protein                                  | At3g15670 | Late Embryogenesis Abundant Protein, Putative / LEA Protein, Putative                        |
| P0693E08.4  | Alpha-Expansin Osexpa13                        | At1g20190 | Atexpa11 (Arabidopsis Thaliana Expansin A11)                                                 |
| P0695H10.11 | Hypothetical Protein                           | At5g39990 | Glycosyltransferase Family 14 Protein / Core-2/I-Branching Enzyme Family Protein             |
| P0695H10.12 | Putative Casein Kinase                         | At3g03940 | Protein Kinase Family Protein                                                                |
| P0695H10.14 | Putative Signal Recognition Particle 54K       | At1g48900 | Signal Recognition Particle 54 Kda Protein 3 / SRP54 (SRP-54C)                               |
| P0695H10.9  | Putative Transcription Initiation Factor       | At1g75510 | Transcription Initiation Factor IIF Beta Subunit (TFIIF-Beta) Family Protein                 |
| P0696F12.7  | Putative Serine/Threonine-Specific Protein     | At4g23200 | Protein Kinase Family Protein                                                                |
| P0696F12.9  | Putative Serine/Threonine-Specific Protein     | At4g38830 | Protein Kinase Family Protein                                                                |
| P0696G06.11 | Unknown Protein                                | At1g05720 | Selenoprotein Family Protein                                                                 |
| P0696G06.15 | Putative Chloroplast Membrane-Associated 30 Kd | At1g65260 | Ptac4 (Plastid Transcriptionally Active4)                                                    |
| P0696G06.20 | Putative Calreticulin                          | At1g09210 | Calreticulin 2 (CRT2)                                                                        |
| P0696G06.26 | Unknown Protein                                | At5g36800 | Unknown Protein                                                                              |
| P0696G06.30 | Putative 60S Ribosomal Protein L5              | At5g39740 | 60S Ribosomal Protein L5 (RPL5B)                                                             |
| P0696G06.32 | Putative Cyclin-Dependent Kinase B1-1          | At2g38620 | CDKB1;2 (Cyclin-Dependent Kinase B1;2); Kinase                                               |
| P0696G06.7  | Hypothetical Protein                           | At3g03300 | Dcl2 (Dicer-Like 2)                                                                          |
| P0696G06.9  | Putative Fructokinase I                        | At2g31390 | Pfkb-Type Carbohydrate Kinase Family Protein                                                 |
| P0698A04.23 | Putative Leucyl-Trna Synthetase                | At4g04350 | EMB2369 (EMBRYO DEFECTIVE 2369); ATP Binding / Aminoacyl-Trna Ligase                         |
| P0698A10.11 | Putative Hydroxymethyltransferase              | At1g36370 | SHM7 (Serine Hydroxymethyltransferase 7); Glycine Hydroxymethyltransferase                   |
| P0698A10.13 | Hypothetical Protein                           | At1g22030 | Unknown Protein                                                                              |
| P0698G06.1  | Putative Sec61 Alpha Form 2                    | At2g34250 | Protein Translocase                                                                          |
| P0698G06.3  | Putative Histone Acetyltransferase HAT B       | At5g56740 | Histone Acetyltransferase Family Protein                                                     |
| P0698H10.12 | Unknown Protein                                | At2g39670 | Radical SAM Domain-Containing Protein                                                        |
| P0698H10.9  | Hypothetical Protein                           | At1g10750 | Unknown Protein                                                                              |

|                |                                                 |           |                                                                                                                              |
|----------------|-------------------------------------------------|-----------|------------------------------------------------------------------------------------------------------------------------------|
| P0699H05.16    | Putative 3-Hydroxybutyryl-Coa Dehydrogenase     | At3g15290 | 3-Hydroxybutyryl-Coa Dehydrogenase, Putative                                                                                 |
| P0700A11.12    | Putative Vacuolar ATP Synthase Subunit D        | At3g28715 | H <sup>+</sup> -Transporting Two-Sector Atpase, Putative                                                                     |
| P0700D12.114-2 | Oxysterol-Binding Protein-Like                  | At4g25850 | Oxysterol-Binding Family Protein                                                                                             |
| P0700D12.116   | 30S Ribosomal Protein S16-Like                  | At5g56940 | Ribosomal Protein S16 Family Protein                                                                                         |
| P0700F06.13    | Putative Rieske Iron-Sulfur Protein Tic55       | At2g24820 | TIC55 (TRANSLOCON AT THE INNER ENVELOPE MEMBRANE OF CHLOROPLASTS 55); Oxidoreductase                                         |
| P0700F06.14    | Putative Tumor Differentially Expressed Protein | At1g16180 | TMS Membrane Family Protein / Tumour Differentially Expressed (TDE) Family Protein                                           |
| P0700F06.15-1  | Zinc Finger (CCCH-Type) Protein-Like            | At2g24830 | Zinc Finger (CCCH-Type) Family Protein / D111/G-Patch Domain-Containing Protein                                              |
| P0700F06.17    | Unknown Protein                                 | At3g01780 | Encodes TPLATE, A Cytokinesis Protein Targeted To The Cell Plate                                                             |
| P0700F06.22    | Cytochrome B5 Domain-Containing Protein-Like    | At3g48890 | ATMP2 (ARABIDOPSIS THALIANA MEMBRANE-ASSOCIATED PROGESTERONE BINDING PROTEIN 3); Heme Binding / Transition Metal Ion Binding |
| P0700F06.24    | Unknown Protein                                 | At1g76820 | Putative Translation Initiation Factor IF-2.                                                                                 |
| P0700F06.32    | Translation Initiation Factor IF-3-Like         | At2g24060 | Translation Initiation Factor 3 (IF-3) Family Protein                                                                        |
| P0700F06.34-3  | Putative Carboxypeptidase D                     | At4g30610 | Brs1 (Bri1 Suppressor 1)                                                                                                     |
| P0700F06.36    | Putative Leucine Aminopeptidase                 | At2g24200 | Cytosol Aminopeptidase                                                                                                       |
| P0701D05.3     | Putative RNA Helicase                           | At5g05450 | DEAD/DEAH Box Helicase, Putative (RH18)                                                                                      |
| P0701D05.34    | Thioredoxin-Like Protein                        | At3g08710 | ATH9 (Thioredoxin H-Type 9)                                                                                                  |
| P0701D05.8     | Hypothetical Protein                            | At5g64190 | Unknown Protein                                                                                                              |
| P0701E06.10    | Putative Enoyl-ACP Reductase                    | At2g05990 | MOD1 (MOSAIC DEATH 1); Enoyl-[Acyl-Carrier-Protein] Reductase (NADH)/ Oxidoreductase                                         |
| P0701F11.30    | Zinc Finger (C3HC4-Type RING Finger)-Like       | At3g53690 | Zinc Finger (C3HC4-Type RING Finger) Family Protein                                                                          |
| P0701F11.5-1   | Putative CBL-Interacting Protein Kinase         | At5g10930 | CIPK5 (CBL-INTERACTING PROTEIN KINASE 5); Kinase                                                                             |
| P0701F11.5-2   | Putative CBL-Interacting Protein Kinase         | At5g25110 | CIPK25 (CBL-INTERACTING PROTEIN KINASE 25); Kinase                                                                           |
| P0702B09.7     | Putative Dihydropyrimidinase                    | At5g12200 | Dihydropyrimidinase / Dhpase / Dihydropyrimidine Amidohydrolase / Hydantoinase (PYD2)                                        |
| P0702C09.13-1  | Unknown Protein                                 | At5g14790 | Binding                                                                                                                      |
| P0702C09.33    | Putative Mtn3                                   | At5g50790 | Nodulin Mtn3 Family Protein                                                                                                  |
| P0702E04.10    | MADS Box Protein                                | At1g24260 | SEP3 (SEPALATA3); Transcription Factor                                                                                       |
| P0702E04.15    | Ftsj Cell Division Protein-Like                 | At5g09530 | Hydroxyproline-Rich Glycoprotein Family Protein                                                                              |
| P0702E04.16    | Putative Glutamate-1-Semialdehyde               | At3g48730 | GSA2 (GLUTAMATE-1-SEMIALDEHYDE 2,1-AMINOMUTASE 2); Glutamate-1-Semialdehyde 2,1-Aminomutase                                  |
| P0702E04.18    | Nuclear Transport Factor 2 (NTF-2)              | At1g27310 | NTF2A (NUCLEAR TRANSPORT FACTOR 2A); Ran Gtpase Binding / Protein Transporter                                                |
| P0702E04.19    | Nodulin-Related Protein-Like                    | At5g14120 | Nodulin Family Protein                                                                                                       |
| P0702E04.22    | Putative Peroxidase                             | At4g37520 | Peroxidase 50 (PER50) (P50) (PRXR2)                                                                                          |
| P0702E04.27    | Coated Vesicle Membrane Protein-Like            | At3g07680 | Emp24/Gp25l/P24 Family Protein                                                                                               |
| P0702F05.10    | Unknown Protein                                 | At4g23850 | Long-Chain-Fatty-Acid--Coa Ligase / Long-Chain Acyl-Coa Synthetase                                                           |
| P0702F05.23    | Unknown Protein                                 | At3g59140 | ATMRP14 (Arabidopsis Thaliana Multidrug Resistance-Associated Protein 14)                                                    |
| P0702G08.13    | Unknown Protein                                 | At5g46950 | Invertase/Pectin Methylsterase Inhibitor Family Protein                                                                      |



|                |                                               |           |                                                                                        |
|----------------|-----------------------------------------------|-----------|----------------------------------------------------------------------------------------|
| P0702G08.2     | Gtpase Activator Protein-Like                 | At3g07890 | RAB Gtpase Activator                                                                   |
| P0702G08.21    | Enhancer Of Polycomb-Like Protein             | At1g79020 | Transcription Factor-Related                                                           |
| P0702H08.19    | Putative Carboxymethylenebutenolidase         | At2g32520 | Dienelactone Hydrolase Family Protein                                                  |
| P0703B01.25    | Putative Non-Cell-Autonomous Protein Pathway2 | At5g15140 | Aldose 1-Epimerase Family Protein                                                      |
| P0703B01.8     | Unknown Protein                               | At4g39860 | Unknown Protein                                                                        |
| P0703B11.26    | Hypothetical Protein                          | At3g56370 | Leucine-Rich Repeat Transmembrane Protein Kinase, Putative                             |
| P0703B11.29    | Similar To Protein Kinase Atsik               | At3g08760 | ATSIK; Kinase                                                                          |
| P0703C03.43    | 60S Ribosomal Protein L7A                     | At3g62870 | 60S Ribosomal Protein L7A (RPL7aB)                                                     |
| P0704D04.1     | Hypothetical Protein                          | At1g66770 | Nodulin Mtn3 Family Protein                                                            |
| P0704D04.27    | Receptor-Like Protein Kinase-Like             | At2g26730 | Leucine-Rich Repeat Transmembrane Protein Kinase, Putative                             |
| P0705A04.46    | Putative Dendritic Cell 2 Protein<DC2 Protein | At4g29870 | Unknown Protein                                                                        |
| P0705A05.111   | Putative Iron Inhibited ABC Transporter 2     | At5g60790 | ATGCN1 (Arabidopsis Thaliana General Control Non-Repressible 1)                        |
| P0705A05.112-3 | Putative P-Glycoprotein 1                     | At2g36910 | ATPGP1 (ARABIDOPSIS THALIANA P GLYCOPROTEIN1); Calmodulin Binding                      |
| P0705A05.133   | Putative SET1                                 | At4g13460 | SUVH9 (SU(VAR)3-9 HOMOLOG 9); Histone-Lysine N-Methyltransferase/ Zinc Ion Binding     |
| P0706E03.1     | Putative Proteasome 26S Non-Atpase Subunit 2  | At2g20580 | Atrpn1a/RPN1A (26S Proteasome Regulatory Subunit S2 1A); Binding                       |
| P0706E03.4-1   | Putative Eukaryotic Translation Initiation    | At1g36730 | Eukaryotic Translation Initiation Factor 5, Putative / Eif-5, Putative                 |
| P0706E03.6     | Putative GTP-Binding Protein                  | At5g60860 | Atraba1f (Arabidopsis Rab Gtpase Homolog A1f); GTP Binding                             |
| P0706E03.9     | Apospory-Associated Protein C-Like            | At5g66530 | Aldose 1-Epimerase Family Protein                                                      |
| P0707C02.27    | Dehydration-Responsive Protein-Like           | At1g26850 | Dehydration-Responsive Family Protein                                                  |
| P0707C02.28    | Putative Phosphofructokinase                  | At2g22480 | Phosphofructokinase Family Protein                                                     |
| P0707C02.31    | Putative Glucose Transporter                  | At4g02050 | Sugar Transporter, Putative                                                            |
| P0707D10.20    | Unknown Protein                               | At5g11320 | YUC4 (YUCCA4); Monooxygenase                                                           |
| P0707D10.27    | Hypothetical Protein                          | At1g80310 | Sulfate Transporter                                                                    |
| P0707D10.28    | Hypothetical Protein                          | At3g22690 | Pentatricopeptide (PPR) Repeat-Containing Protein                                      |
| P0707D10.7     | Hypothetical Protein                          | At5g17460 | Unknown Protein                                                                        |
| P0708B04.1     | Putative Male Fertility Protein               | At1g74020 | SS2 (STRICTOSIDINE SYNTHASE 2); Strictosidine Synthase                                 |
| P0708B04.21    | Putative Senescence-Associated Protein        | At2g23810 | Tet8 (Tetraspanin8)                                                                    |
| P0708B04.23    | Splicing Factor 3B Subunit 5-Like Protein     | At3g23320 | Unknown Protein                                                                        |
| P0708B04.3-1   | Putative Calcineurin B Subunit                | At3g18430 | Calcium-Binding EF Hand Family Protein                                                 |
| P0708D12.3     | Putative Casein Kinase                        | At3g13670 | Protein Kinase Family Protein                                                          |
| P0708H12.35    | Trehalose-6-Phosphate Phosphatase             | At5g51460 | ATTPPA (Arabidopsis Thaliana Trehalose-6-Phosphate Phosphatase); Trehalose-Phosphatase |
| P0708H12.4-1   | F-Box Protein-Like                            | At5g51380 | F-Box Family Protein                                                                   |
| P0709D11.15    | Putative Oxidoreductase, Zinc-Binding         | At1g23740 | Oxidoreductase, Zinc-Binding Dehydrogenase Family Protein                              |
| P0709D11.28    | Putative Polygalacturonase Isoenzyme 1 Beta   | At1g70370 | BURP Domain-Containing Protein / Polygalacturonase, Putative                           |
| P0710A02.3     | Putative Protein Kinase AFC3                  | At4g32660 | AME3; Kinase                                                                           |

|               |                                                  |           |                                                                                                                  |
|---------------|--------------------------------------------------|-----------|------------------------------------------------------------------------------------------------------------------|
| P0710A02.4    | Cytosolic Aldehyde Dehydrogenase                 | At3g48000 | ALDH2B4 (ALDEHYDE DEHYDROGENASE 2); 3-Chloroallyl Aldehyde Dehydrogenase/Aldehyde Dehydrogenase (NAD)            |
| P0710F09.119  | Putative Chalcone Synthase                       | At4g34850 | Chalcone And Stilbene Synthase Family Protein                                                                    |
| P0711A01.29-1 | Putative HAK2                                    | At1g60160 | Potassium Transporter Family Protein                                                                             |
| P0711F01.27   | Putative Protein-Arginine N-Methyltransferase    | At4g29510 | Protein Arginine N-Methyltransferase, Putative                                                                   |
| P0711F01.41   | Putative FAE1                                    | At4g34510 | KCS2 (3-Ketoacyl-Coa Synthase 2); Acyltransferase                                                                |
| P0711F01.51   | ATP-Binding Cassette Transporter Atabca1-Like    | At3g47780 | ATATH6 (ABC2 Homolog 6); Atpase, Coupled To Transmembrane Movement Of Substances                                 |
| P0711F01.53   | Putative Serine/Threonine Protein Kinase         | At5g15080 | Protein Kinase, Putative                                                                                         |
| P0711F01.56-1 | Voltage-Dependent Anion Channel                  | At3g01280 | Porin, Putative                                                                                                  |
| P0711H09.10-1 | Putative AT-Hook DNA-Binding Protein             | At2g33620 | DNA-Binding Family Protein / AT-Hook Protein 1 (AHP1)                                                            |
| P0711H09.13   | Protein Cdc2 Kinase                              | At1g20930 | CDKB2;2 (CYCLIN-DEPENDENT KINASE B2;2); Kinase                                                                   |
| P0711H09.15   | 3-Hydroxy-3-Methylglutaryl-Coenzyme A Reductase  | At1g76490 | Hmg1 (3-Hydroxy-3-Methylglutaryl Coa Reductase)                                                                  |
| P0711H09.20   | Unknown Protein                                  | At3g18240 | Unknown Protein                                                                                                  |
| P0711H09.4    | Unknown Protein                                  | At2g17350 | Unknown Protein                                                                                                  |
| P0711H09.5    | Putative Aminoacylase                            | At4g38220 | Aminoacylase, Putative / N-Acyl-L-Amino-Acid Amidohydrolase, Putative                                            |
| P0711H09.9    | Putative Rab Geranylgeranyltransferase, Beta     | At5g12210 | Geranylgeranyl Transferase Type II Beta Subunit, Putative / RAB Geranylgeranyltransferase Beta Subunit, Putative |
| P0712E02.24   | Unknown Protein                                  | At1g69800 | CBS Domain-Containing Protein                                                                                    |
| P0712E02.8    | Unknown Protein                                  | At5g35460 | Unknown Protein                                                                                                  |
| P0724B10.10   | Putative Syntaxin                                | At5g16830 | SNARE (Syntaxin 21); T-SNARE                                                                                     |
| P0724B10.17   | Putative Cytochrome P450                         | At4g19230 | CYP707A1 (Cytochrome P450, Family 707, Subfamily A, Polypeptide 1); Oxygen Binding                               |
| P0724B10.23   | Nodulin-Like Protein                             | At4g30420 | Nodulin Mtn21 Family Protein                                                                                     |
| P0724B10.24   | Putative 9-Cis-Epoxycarotenoid Dioxygenase       | At4g19170 | Nced4 (Nine-Cis-Epoxycarotenoid Dioxygenase 4)                                                                   |
| P0724B10.3-1  | Putative Protein Kinase Yaka                     | At5g35980 | Kinase                                                                                                           |
| P0724B10.35   | Phosphatidic Acid Phosphatase-Like               | At5g66450 | Phosphatidic Acid Phosphatase-Related / PAP2-Related                                                             |
| P0724B10.38   | Putative Ornithine Carbamoyltransferase          | At1g75330 | OTC (ORNITHINE CARBAMOYLTRANSFERASE); Amino Acid Binding / Carboxyl- And Carbamoyltransferase                    |
| P0724B10.42   | Putative Phenylcoumaran Benzylic Ether Reductase | At4g34540 | Isoflavone Reductase Family Protein                                                                              |
| P0724B10.43   | Hydrolase, Alpha/Beta Fold Family-Like           | At4g36530 | Hydrolase, Alpha/Beta Fold Family Protein                                                                        |
| P0724B10.5    | Unknown Protein                                  | At1g31650 | ATROPGEF14/ROPGEF14 (KINASE PARTNER PROTEIN-LIKE); Rho Guanyl-Nucleotide Exchange Factor                         |
| P0758B01.6-1  | Putative Thromboxane-A Synthase                  | At2g26170 | CYP711A1 (MORE AXILLARY BRANCHES 1); Oxygen Binding                                                              |
| PPR683        | Hypothetical Protein                             | At1g63130 | Pentatricopeptide (PPR) Repeat-Containing Protein                                                                |
| PPR762        | Hypothetical Protein                             | At1g62910 | Pentatricopeptide (PPR) Repeat-Containing Protein                                                                |
| q3037.18      | Hypothetical Protein                             | At1g63930 | Unknown Protein                                                                                                  |
| q3037.20      | Similar To Medicago Nodulin N21 (Mtn21)          | At1g68170 | Nodulin Mtn21 Family Protein                                                                                     |
| W455ERIPDK    | Putative GTP-Binding Protein                     | At1g02130 | ATRA1B (Arabidopsis Thaliana Responsive To Abscisic Acid 1B); GTP Binding                                        |

**Supplementary Table 2:** Libraries and signature counts in Rice

| <b>Code</b> | <b>Title</b>                                       | <b>No. of Signatures</b> |
|-------------|----------------------------------------------------|--------------------------|
| 9LA         | Leaves                                             | 1,606,175                |
| 9LB         | Leaves - Replicate                                 | 1,005,937                |
| 9LC         | Leaves                                             | 1,144,192                |
| 9LD         | Leaves - Replicate                                 | 1,146,212                |
| 9ME         | Merismatic Tissue                                  | 2,112,790                |
| 9RO         | Roots                                              | 2,162,940                |
| 9RR         | Roots - Replicate                                  | 2,156,164                |
| FLA         | F1 Hybrid 60days Mature Leaf Replicate A           | 1,171,478                |
| FLB         | F1 Hybrid 60days Mature Leaf Replicate B           | 1,040,468                |
| FLC         | F1 Hybrid 60days Mature Leaf Replicate C           | 1,056,621                |
| FLD         | F1 Hybrid 60days Mature Leaf Replicate D           | 1,419,115                |
| FME         | F1 Hybrid 60days Meristematic tissue               | 3,045,290                |
| FRO         | F1 Hybrid 60days Mature Root                       | 2,436,387                |
| FRR         | F1 Hybrid 60days Mature Root-Repl                  | 2,205,884                |
| MC00        | Mock treatment-0hr                                 | 1,372,860                |
| MC24        | Mock treatment-24hr                                | 1,402,116                |
| MR03        | M. grisea-R-3hr                                    | 1,422,272                |
| MR06        | M. grisea-R-6hr                                    | 1,054,700                |
| MR12        | M. grisea-R-12hr                                   | 1,331,343                |
| MR24        | M. grisea-R-24hr                                   | 1,435,098                |
| MR48        | M. grisea-R-48hr                                   | 1,367,250                |
| MS03        | M. grisea-S-3hr                                    | 1,584,229                |
| MS06        | M. grisea-S-6hr                                    | 1,354,948                |
| MS12        | M. grisea-S-12hr                                   | 1,086,361                |
| MS24        | M. grisea-S-24hr                                   | 1,022,535                |
| MS48        | M. grisea-S-48hr                                   | 1,518,407                |
| MS96        | M. grisea-S-96hr                                   | 1,061,873                |
| NCA         | 35 days - Callus                                   | 2,131,255                |
| NCL         | 14 days - Young leaves stressed in 4C cold for 24h | 2,322,924                |

|     |                                                                 |           |
|-----|-----------------------------------------------------------------|-----------|
| NCR | 14 days - Young roots stressed in 4C cold for 24h               | 2,401,553 |
| NDL | 14 days - Young leaves stressed in drought for 5 days           | 2,613,140 |
| NDR | 14 days - Young roots stressed in drought for 5 days            | 2,190,870 |
| NGD | 10 days - Germinating seedlings grown in dark                   | 2,512,579 |
| NGS | 3 days - Germinating seed                                       | 1,861,571 |
| NIP | 90 days - Immature panicle                                      | 2,661,421 |
| NL4 | Leaf - Combination of Replicates                                | 4,940,921 |
| NLA | 60 days - Mature Leaves - Replicate A                           | 1,073,991 |
| NLB | 60 days - Mature Leaves - Replicate B                           | 1,348,557 |
| NLC | 60 days - Mature Leaves - Replicate C                           | 1,263,549 |
| NLD | 60 days - Mature Leaves - Replicate D                           | 1,254,824 |
| NME | 60 days - Crown vegetative meristematic tissue                  | 2,568,641 |
| NOS | Ovary and mature stigma                                         | 2,499,264 |
| NPO | Mature Pollen                                                   | 2,310,574 |
| NR2 | Root - Combination of Replicates                                | 5,293,337 |
| NRA | 60 days - Mature Roots - Replicate A                            | 2,675,567 |
| NRB | 60 days - Mature Roots - Replicate B                            | 2,617,770 |
| NSL | 14 days - Young leaves stressed in 250 mM NaCl for 24h          | 2,531,362 |
| NSR | 14 days - Young roots stressed in 250 mM NaCl for 24h           | 1,842,226 |
| NST | 60 days - Stem                                                  | 2,095,983 |
| NYL | 14 days - Young leaves                                          | 2,249,147 |
| NYR | 14 days - Young Roots                                           | 1,944,785 |
| PLA | rice leaf, beet armyworm damaged, 24 hr(99-1726)                | 1,150,869 |
| PLC | rice leaf, mechanical damaged, 24 hr                            | 1,213,577 |
| PLW | rice leaf, water weevil damaged, 24 hr                          | 1,012,170 |
| PSC | rice developing seeds, 6 days old cypress high milling(99-1710) | 1,266,713 |
| PSI | rice developing seeds,6 days old, Ilpumbyeo - High Taste        | 1,201,584 |

|      |                                                                    |           |
|------|--------------------------------------------------------------------|-----------|
| PSL  | rice developing seeds, 6 days old, LaGrue-Low Milling              | 1,082,099 |
| PSN  | rice developing seed, 6 days old, Nipponbare-Grain quality control | 1,207,914 |
| PSY  | rice developing seeds,6 days old, YR15965Acp33 - Low Taste         | 1,190,250 |
| XC00 | Unwounded Control-Nipponbare Xa21-0hr                              | 1,190,318 |
| XC06 | Mock treatment-6hr                                                 | 1,367,076 |
| XC24 | Mock treatment-24hr                                                | 1,165,716 |
| XR03 | X.oryzae-R-3hr                                                     | 1,134,269 |
| XR06 | X.oryzae-R-6hr                                                     | 1,269,616 |
| XR12 | X.oryzae-R-12hr                                                    | 1,542,183 |
| XR24 | X.oryzae-R-24hr                                                    | 1,055,586 |
| XR48 | X.oryzae- R-48hr                                                   | 1,248,814 |
| XS03 | X.oryzae-S-3hr                                                     | 1,466,965 |
| XS06 | X.oryzae-S-6hr                                                     | 1,419,178 |
| XS12 | X.oryzae- S-12hr                                                   | 1,444,840 |
| XS24 | X.oryzae- S-24hr                                                   | 1,264,383 |
| XS48 | X.oryzae-S-48hr                                                    | 1,175,368 |

**Supplementary Table 3: Libraries and signature counts in Arabidopsis**

| Library               | Code | Description                                    | Total Signatures |
|-----------------------|------|------------------------------------------------|------------------|
| Callus                | CAF  | actively growing, classic MPSS                 | 1,959,539        |
| Inflorescence         | INF  | mixed stage, immature buds, classic MPSS       | 1,774,306        |
| Leaves                | LEF  | 21 day, untreated, classic MPSS                | 2,884,598        |
| Root                  | ROF  | 21 day, untreated, classic MPSS                | 3,642,632        |
| Silique               | SIF  | 24 to 48 hr post-fertilization, classic MPSS   | 2,012,859        |
| ap1-10 inflorsenece   | AP1  | mixed stage, immature buds                     | 2,964,724        |
| ap3-6 infloresence    | AP3  | mixed stage, immature buds                     | 2,435,965        |
| Agamous infloresence  | AGM  | mixed stage, immature buds                     | 2,575,670        |
| Inflorescence         | INS  | mixed stage, immature buds                     | 2,890,894        |
| Root                  | ROS  | 21 day, untreated                              | 2,458,436        |
| sup/ap1 infloresence  | SAP  | mixed stage, immature buds                     | 2,310,350        |
| Leaves,               | S04  | 4 hr after salicylic acid treatment            | 3,006,975        |
| Leaves,               | S52  | 52 hr after salicylic acid treatment           | 2,964,840        |
| Leaves                | LES  | 21 day, untreated                              | 3,109,385        |
| Germinating seedlings | GSE  | Germinating seedlings                          | 2,550,655        |
| Callus                | CAS  | actively growing, signature MPSS               | 1,919,458        |
| Silique               | SIS  | 24 to 48 hr post-fertilization, signature MPSS | 2,349,283        |

**Supplementary Table 4:** Details of rice-Arabidopsis housekeeping homologous gene-pairs with their corresponding short functional description. Dn represents non-synonymous substitution rates, Ds represents synonymous substitution rates, Exp\_rank corresponds to expression rank for individual rice genes, GC<sub>3</sub> represents GC content at synonymous third codon position. wRn stands for error minimization values and FFE represents free folding energy of rice genes.

| <i>Rice Housekeeping Gene ID</i> | <i>Functional Description</i>                   | <i>Arabidopsis Gene ID</i> | <i>Functional description</i>                                                              | <i>Dn</i> | <i>Ds</i> | <i>Exp_rank</i> | <i>GC<sub>3</sub></i> | <i>wRn</i> | <i>FFE</i> |
|----------------------------------|-------------------------------------------------|----------------------------|--------------------------------------------------------------------------------------------|-----------|-----------|-----------------|-----------------------|------------|------------|
| B1011A07.31                      | Putative Branched Chain Alpha-Keto Acid         | At3g06850                  | DIN3/LTA1 (DARK INDUCIBLE 3); Alpha-Ketoacid Dehydrogenase                                 | 0.3377    | 2.3877    | 1               | 47.4470               | -0.1220    | -0.0249    |
| B1116H04.25                      | Putative Activator Of 90 Kda Heat Shock Protein | At3g12050                  | Aha1 Domain-Containing Protein                                                             | 0.2758    | 4.0649    | 1               | 83.6990               | -0.4609    | -0.0430    |
| B1120F06.103                     | Unknown Protein                                 | At5g63440                  | Unknown Protein                                                                            | 0.1327    | 3.7843    | 1               | 48.8260               | 0.0135     | -0.0810    |
| B1131G08.9                       | Hypothetical Protein                            | At1g29190                  | Hypothetical Protein                                                                       | 0.4423    | 3.5749    | 1               | 91.0110               | -0.4516    | -0.1236    |
| OJ1003_E05.12                    | Unknown Protein                                 | At4g28430                  | Reticulon Family Protein                                                                   | 0.7466    | 3.5888    | 1               | 73.8370               | -0.2062    | -0.0830    |
| OJ1004C08.18                     | Putative Protein Kinase                         | At1g20650                  | Protein Kinase                                                                             | 0.3943    | 4.2327    | 1               | 61.9570               | -0.1400    | -0.0504    |
| OJ1008_D06.10                    | Putative S-Adenosyl-L-Methionine:Salicylic Acid | At5g66430                  | S-Adenosyl-L-Methionine:Carboxyl Methyltransferase Family Protein                          | 0.6264    | 4.1153    | 1               | 86.9080               | -0.4801    | -0.0408    |
| OJ1014_H03.11                    | Putative Anther-Specific Proline-Rich Protein   | At5g33370                  | GDSL-Motif Lipase/Hydrolase Family Protein                                                 | 0.2670    | 4.1522    | 1               | 90.8570               | -0.4465    | -0.0354    |
| OJ1047_C01.14                    | Putative Interferon-Related Protein             | At1g27760                  | Interferon-Related Developmental Regulator Family Protein / IFRD Protein Family            | 0.5031    | 2.9312    | 1               | 43.6590               | -0.1589    | -0.0260    |
| OJ1057_E05.110                   | Putative Nramp1 Protein                         | At1g80830                  | NRAMP1 (NRAMP Metal Ion Transporter 1); Manganese Ion Transporter/ Metal Ion Transporter   | 0.3917    | 4.5023    | 1               | 77.5000               | -0.4968    | -0.0217    |
| OJ1081_B12.106-3                 | P53 Binding Protein-Like                        | At1g67320                  | DNA Primase, Large Subunit Family                                                          | 0.3462    | 3.2364    | 1               | 51.9570               | -0.1473    | -0.0505    |
| OJ1111_C07.25                    | Putative Serine Palmitoyltransferase LCB1       | At4g36480                  | ATLCB1 (ARABIDOPSIS THALIANA SPHINGOLIPID LONGCHAIN BASE 1); Serine C-Palmitoyltransferase | 0.2450    | 2.3034    | 1               | 37.7230               | -0.0794    | -0.0547    |
| OJ1111_C07.26                    | Putative Phosphoenolpyruvate Carboxylase Kinase | At1g08650                  | PPCK1 (PHOSPHOENOLPYRUVATE CARBOXYLASE KINASE); Kinase                                     | 0.4265    | 3.8441    | 1               | 96.7150               | -0.3681    | -0.0761    |
| OJ1112_G07.12                    | Putative Rar1                                   | At5g51700                  | Pbs2 (Pphb Susceptible 2)                                                                  | 0.2779    | 3.5972    | 1               | 35.6320               | -0.0390    | -0.1028    |
| OJ1119_A01.21-1                  | Putative 50S Ribosomal Protein L9, Chloroplast  | At3g44890                  | RPL9 (Ribosomal Protein L9); Structural Constituent Of Ribosome                            | 0.2662    | 3.6649    | 1               | 59.1950               | -0.1830    | -0.0471    |
| OJ1119_B10.31                    | Light Induced Protein Like                      | At4g22310                  | Unknown Protein                                                                            | 0.1204    | 3.1667    | 1               | 37.0370               | 0.0837     | -0.1128    |
| OJ1126B12.12                     | Putative Ubiquitin-Conjugating Enzyme           | At3g57870                  | AHUS5 (EMBRYO DEFECTIVE 1637); Ubiquitin-Protein Ligase                                    | 0.0852    | 3.3972    | 1               | 58.4420               | -0.5007    | -0.1119    |
| OJ1126B12.8                      | Putative MADS Box-Like Protein                  | At4g22950                  | AGL19 (AGAMOUS-LIKE 19); Transcription Factor                                              | 0.5405    | 3.4458    | 1               | 55.7250               | -0.4748    | -0.1086    |
| OJ1134_F06.8-1                   | Putative Peroxisomal Targeting                  | At1g29260                  | PEX7 (Peroxin 7)                                                                           | 0.304     | 4.0848    | 1               | 94.8550               | -0.3608    | -0.0795    |

|                  |                                                  |           |                                                                                                                                                                                          |            |        |   |         |         |         |
|------------------|--------------------------------------------------|-----------|------------------------------------------------------------------------------------------------------------------------------------------------------------------------------------------|------------|--------|---|---------|---------|---------|
|                  | Signal Type 2                                    |           |                                                                                                                                                                                          | 8          |        |   |         |         |         |
| OJ1150_A11.12-1  | Putative DHHC-Type Zinc Finger Domain-Containing | At3g22180 | Zinc Finger (DHHC Type) Family Protein                                                                                                                                                   | 0.464<br>3 | 4.7025 | 1 | 59.0980 | -0.2672 | -0.0175 |
| OJ1175_B01.14-2  | Unknown Protein                                  | At4g24610 | Unknown Protein                                                                                                                                                                          | 0.305<br>8 | 4.9323 | 1 | 44.9700 | -0.1046 | -0.0244 |
| OJ1175C11.9      | Putative RING Zinc Finger Protein                | At4g34370 | IBR Domain-Containing Protein                                                                                                                                                            | 0.321<br>7 | 4.4045 | 1 | 51.3940 | -0.2428 | -0.0293 |
| OJ1191_A10.101   | Putative Auxin-Induced Protein                   | At3g25290 | Auxin-Responsive Family Protein                                                                                                                                                          | 0.461<br>6 | 4.2146 | 1 | 80.6280 | -0.5002 | -0.0679 |
| OJ1214_E03.9     | Putative T-Complex Protein 1 Beta Subunit        | At5g20890 | Chaperonin, Putative                                                                                                                                                                     | 0.073<br>6 | 3.9506 | 1 | 46.5650 | -0.3498 | -0.0273 |
| OJ1263_E10.15    | Protein Phosphatase 2A B'kappa Subunit           | At5g25510 | Serine/Threonine Protein Phosphatase 2A (PP2A) Regulatory Subunit B', Putative                                                                                                           | 0.244<br>1 | 4.6214 | 1 | 57.0230 | -0.3946 | -0.0359 |
| OJ1263H11.6      | Unknown Protein                                  | At5g51880 | Oxidoreductase, Acting On Paired Donors, With Incorporation Or Reduction Of Molecular Oxygen, 2-Oxoglutarate As One Donor, And Incorporation Of One Atom Each Of Oxygen Into Both Donors | 0.371<br>3 | 3.8191 | 1 | 54.5850 | -0.4277 | -0.0763 |
| OJ1276_B06.27    | Unknown Protein                                  | At3g27670 | RST1 (RESURRECTION1); Binding                                                                                                                                                            | 0.637<br>1 | 1.6701 | 1 | 42.5140 | -0.0162 | -0.0211 |
| OJ1311_D08.27    | Putative Lysine-Ketoglutarate                    | At4g33150 | Lkr (Saccharopine Dehydrogenase)                                                                                                                                                         | 0.336<br>7 | 1.7409 | 1 | 38.4150 | -0.0135 | -0.0126 |
| OJ1365_D05.6     | Putative Protein Transport SEC23-Related         | At5g43670 | Transport Protein, Putative                                                                                                                                                              | 0.325<br>3 | 3.6904 | 1 | 55.6800 | -0.3236 | -0.0350 |
| OJ1372_D06.24    | Unknown Protein                                  | At4g10300 | Unknown Protein                                                                                                                                                                          | 0.367<br>4 | 3.2763 | 1 | 91.7430 | -0.4120 | -0.1018 |
| OJ1378_A04.7     | Hypothetical Protein                             | At1g22540 | Proton-Dependent Oligopeptide Transport (POT) Family Protein                                                                                                                             | 0.463<br>1 | 4.3594 | 1 | 92.7950 | -0.3550 | -0.0301 |
| OJ1442_E05.22    | Putative 15.9 Kda Subunit Of RNA Polymerase II   | At5g09920 | RPB15.9 (RNA Polymerase II 15.9)                                                                                                                                                         | 0.159<br>2 | 3.3908 | 1 | 96.8250 | -0.4680 | -0.0951 |
| OJ1442_E05.24    | Unknown Protein                                  | At1g73060 | Unknown Protein                                                                                                                                                                          | 0.261<br>5 | 2.3707 | 1 | 55.3670 | -0.3962 | -0.0416 |
| OJ1457_D07.109-1 | Putative Regulator Of Nonsense Transcripts 1     | At5g47010 | LBA1/UPF1 (LOW-LEVEL BETA-AMYLASE 1); RNA Helicase                                                                                                                                       | 0.163<br>1 | 5.0465 | 1 | 44.9850 | 0.0583  | -0.0102 |
| OJ1524_D08.2     | Putative Dnaj Homolog, Subfamily C, Member 9     | At3g12170 | DNAJ Heat Shock N-Terminal Domain-Containing Protein                                                                                                                                     | 0.254<br>8 | 2.8260 | 1 | 51.4170 | -0.2883 | -0.0550 |
| OJ1534_E09.9-2   | Unknown Protein                                  | At5g35560 | DENN (AEX-3) Domain-Containing Protein                                                                                                                                                   | 0.514<br>1 | 4.7785 | 1 | 43.1510 | 0.3659  | -0.0686 |
| OJ1548_F12.23    | Putative Quinone Oxidoreductase                  | At4g21580 | Oxidoreductase, Zinc-Binding Dehydrogenase Family Protein                                                                                                                                | 0.264<br>7 | 1.7860 | 1 | 63.3990 | -0.5881 | -0.0576 |
| OJ1579_C03.5     | Unknown Protein                                  | At5g39360 | Circadian Clock Coupling Factor-Related                                                                                                                                                  | 0.212<br>5 | 3.8690 | 1 | 67.6600 | -0.3931 | -0.0915 |
| OJ1643_A10.16    | Membrane-Associated Salt-Inducible Protein Like  | At4g36680 | Pentatricopeptide (PPR) Repeat-Containing Protein                                                                                                                                        | 0.637<br>3 | 2.1844 | 1 | 71.7700 | -0.3287 | -0.0402 |
| OJ1695_A02.23    | Putative U4/U6-Associated RNA Splicing Factor    | At1g28060 | Small Nuclear Ribonucleoprotein Family Protein / Snrnp Family Protein                                                                                                                    | 0.244<br>0 | 4.2665 | 1 | 40.5150 | -0.0816 | -0.0246 |
| OJ1695_A02.34    | Putative Ferredoxin-Thioredoxin Reductase        | At2g04700 | Ferredoxin Thioredoxin Reductase Catalytic Beta Chain Family Protein                                                                                                                     | 0.279<br>0 | 3.4271 | 1 | 49.6400 | -0.2345 | -0.0582 |
| OJ1705_A03.38    | Putative Threonyl-Trna Synthetase                | At5g26830 | Threonyl-Trna Synthetase / Threonine--Trna Ligase (THRRS)                                                                                                                                | 0.220<br>7 | 4.5367 | 1 | 47.8770 | -0.2876 | -0.0239 |
| OJ1710_H11.105-1 | Putative CND41, Chloroplast                      | At3g50050 | Aspartyl Protease Family Protein                                                                                                                                                         | 0.370      | 2.0856 | 1 | 46.5120 | -0.2476 | -0.0409 |



|                   |                                                  |           |                                                                                                    |        |        |   |         |         |         |  |
|-------------------|--------------------------------------------------|-----------|----------------------------------------------------------------------------------------------------|--------|--------|---|---------|---------|---------|--|
|                   | Nucleoid DNA Binding                             |           |                                                                                                    | 8      |        |   |         |         |         |  |
| OJ1717_A09.37     | Putative GAMM1 Protein                           | At5g41970 | Unknown Protein                                                                                    | 0.1909 | 4.1041 | 1 | 54.2680 | -0.3442 | -0.0693 |  |
| OJ1743_B12.40     | Putative Clathrin Coat Assembly Protein AP50     | At5g46630 | Clathrin Adaptor Complexes Medium Subunit Family Protein                                           | 0.0422 | 3.5074 | 1 | 44.4170 | -0.2375 | -0.0372 |  |
| OJ1789_D08.10     | Glutaredoxin-Like                                | At5g14070 | Glutaredoxin Family Protein                                                                        | 0.3382 | 3.3431 | 1 | 97.6560 | -0.2983 | -0.2044 |  |
| OJ1791_B03.50-2   | 2 Coiled Coil Domains Of Eukaryotic Origin (31.3 | At3g18790 | Unknown Protein                                                                                    | 0.2277 | 3.8953 | 1 | 87.5490 | -0.6059 | -0.0505 |  |
| OSJNBa0003O19.5   | Unknown Protein                                  | At2g26890 | GRV2 (KATAMARI2); Binding / Heat Shock Protein Binding                                             | 0.1999 | 5.0206 | 1 | 37.0370 | -0.0182 | -0.0110 |  |
| OSJNBa0004B24.2   | Putative Purple Acid Phosphatase                 | At3g20500 | ATPAP18/PAP18 (Purple Acid Phosphatase 18); Acid Phosphatase/ Protein Serine/Threonine Phosphatase | 0.1965 | 2.2081 | 1 | 50.0000 | -0.1335 | -0.0081 |  |
| OSJNBa0004E08.1   | Putative Cyclophilin                             | At2g16600 | ROC3 (Rotamase Cyp 3)                                                                              | 0.3264 | 3.6366 | 1 | 97.1590 | -0.4355 | -0.1011 |  |
| OSJNBa0006B20.3   | Unknown Protein                                  | At1g04290 | Thioesterase Family Protein                                                                        | 0.4990 | 2.2975 | 1 | 83.4480 | -0.4955 | -0.1261 |  |
| OSJNBa0009C08.12  | Unknown Protein                                  | At3g61320 | Unknown Protein                                                                                    | 0.3682 | 2.2535 | 1 | 70.2920 | -0.5081 | -0.0326 |  |
| OSJNBa0010E04.12  | Putative Small Nuclear Ribonucleoprotein         | At3g47120 | RNA Recognition Motif (RRM)-Containing Protein                                                     | 0.4499 | 3.8781 | 1 | 56.0280 | -0.1794 | -0.0462 |  |
| OSJNBa0010H02.13  | Unknown Protein                                  | At1g19800 | Tgd1 (Trigalactosyldiacylglycerol 1)                                                               | 0.4284 | 4.2276 | 1 | 75.5160 | -0.5293 | -0.0247 |  |
| OSJNBa0010H02.2   | Unknown Protein                                  | At4g38390 | Unknown Protein                                                                                    | 0.4124 | 4.4123 | 1 | 47.8990 | 0.1563  | -0.0439 |  |
| OSJNBa0010K01.7   | Putative Receptor Protein Kinase                 | At1g28440 | HSL1 (HAESA-LIKE 1); ATP Binding / Kinase/ Protein Serine/Threonine Kinase                         | 0.3438 | 4.9159 | 1 | 79.1400 | -0.4180 | -0.0091 |  |
| OSJNBa0013D02.9   | Putative MAP Kinase 1                            | At3g45640 | ATMPK3 (MITOGEN-ACTIVATED PROTEIN KINASE 3); MAP Kinase/ Kinase/ Protein Kinase                    | 0.1833 | 4.0862 | 1 | 92.4700 | -0.4447 | -0.0333 |  |
| OSJNBa0014O06.3   | Hypothetical Protein                             | At1g03010 | Phototropic-Responsive NPH3 Family Protein                                                         | 0.6305 | 4.5377 | 1 | 91.6810 | -0.3821 | -0.0342 |  |
| OSJNBa0015K02.7   | Unknown Protein                                  | At5g24940 | Protein Phosphatase 2C, Putative / PP2C, Putative                                                  | 0.1902 | 3.9330 | 1 | 40.9770 | -0.2716 | -0.0762 |  |
| OSJNBa0016N23.122 | Putative Alcohol Dehydrogenase Homolog           | At1g62610 | Oxidoreductase                                                                                     | 0.3792 | 4.1158 | 1 | 61.3970 | -0.2628 | -0.1004 |  |
| OSJNBa0016O02.3   | Unknown Protein                                  | At5g08170 | EMB1873 (EMBRYO DEFECTIVE 1873); Agmatine Deiminase                                                | 0.3471 | 2.8158 | 1 | 46.0320 | -0.0659 | -0.0385 |  |
| OSJNBa0019D11.19  | Unknown Protein                                  | At5g54140 | ILL3 (IAA-Amino Acid Hydrolase ILR1-Like 3); Metallopeptidase                                      | 0.3504 | 1.9783 | 1 | 53.9640 | -0.5149 | -0.0162 |  |
| OSJNBa0019F11.23  | Putative Plastid Protein                         | At1g32580 | Plastid Developmental Protein DAG, Putative                                                        | 0.2813 | 3.8312 | 1 | 78.0950 | -0.4428 | -0.0907 |  |
| OSJNBa0019F11.5   | Unknown Protein                                  | At5g17210 | Unknown Protein                                                                                    | 0.6164 | 3.6961 | 1 | 62.4200 | -0.0849 | -0.1037 |  |
| OSJNBa0022H21.12  | Unknown Protein                                  | At5g50170 | C2 Domain-Containing Protein / GRAM Domain-Containing Protein                                      | 0.4648 | 3.9862 | 1 | 98.5960 | -0.4272 | -0.0623 |  |
| OSJNBa0023I17.12  | Putative Receptor Protein Kinase PERK            | At3g14840 | Leucine-Rich Repeat Family Protein / Protein Kinase Family Protein                                 | 0.5562 | 4.1754 | 1 | 39.0710 | 0.1442  | -0.0384 |  |
| OSJNBa0024J22.1   | Unknown Protein                                  | At1g79940 | Heat Shock Protein Binding / Unfolded Protein Binding                                              | 0.2118 | 1.7743 | 1 | 50.7250 | -0.2040 | -0.0225 |  |

|                   |                                             |           |                                                                                            |        |        |   |         |         |         |
|-------------------|---------------------------------------------|-----------|--------------------------------------------------------------------------------------------|--------|--------|---|---------|---------|---------|
| OSJNBa0026E05.33  | Unknown Protein                             | At5g58110 | Unknown Protein                                                                            | 0.3110 | 2.4383 | 1 | 65.9340 | -0.4600 | -0.1020 |
| OSJNBa0027P08.15  | Unknown Protein                             | At1g19120 | Small Nuclear Ribonucleoprotein, Putative / Snrnp, Putative / Sm Protein, Putative         | 0.1622 | 1.8355 | 1 | 45.5280 | -0.3557 | -0.1368 |
| OSJNBa0031O09.03  | Similar To Histone 2A Domain                | At1g54690 | Histone H2A, Putative                                                                      | 0.0974 | 3.4848 | 1 | 95.4200 | -0.5160 | -0.1277 |
| OSJNBa0032G08.4   | Putative Glycogenin                         | At1g54940 | Glycogenin Glucosyltransferase (Glycogenin)-Related                                        | 0.5336 | 4.3813 | 1 | 96.8970 | -0.3674 | -0.0322 |
| OSJNBa0032G11.13  | Putative Protein Kinase                     | At3g59350 | Kinase                                                                                     | 0.1716 | 4.1600 | 1 | 37.4270 | 0.3225  | -0.0293 |
| OSJNBa0034B05.23  | Putative Synaptobrevin-Like Protein         | At5g22360 | ATVAMP714 (Vesicle-Associated Membrane Protein 714)                                        | 0.1403 | 3.7908 | 1 | 69.3020 | -0.4133 | -0.0776 |
| OSJNBa0035A24.10  | Prefoldin-Related KE2-Like                  | At3g52400 | SYP122 (Syntaxin 122); T-SNARE                                                             | 1.4085 | 2.2482 | 1 | 51.2990 | -0.2903 | -0.1285 |
| OSJNBa0035I03.17  | Putative DNA-Binding Protein Phosphatase 2C | At2g25620 | Protein Phosphatase 2C, Putative / PP2C, Putative                                          | 0.5238 | 2.4156 | 1 | 49.4440 | -0.2149 | -0.0412 |
| OSJNBa0036B21.10  | Unknown Protein                             | At4g39640 | GGT1; Gamma-Glutamyltransferase                                                            | 0.3112 | 2.2018 | 1 | 65.7660 | -0.4467 | -0.0368 |
| OSJNBa0038J17.19  | Unknown Protein                             | At5g45920 | Carboxylic Ester Hydrolase                                                                 | 0.3577 | 1.5981 | 1 | 69.4690 | -0.1762 | -0.0920 |
| OSJNBa0039C07.3   | Unknown Protein                             | At1g32210 | Atdad1 (Defender Against Apoptotic Death 1)                                                | 0.0969 | 2.9715 | 1 | 52.2120 | -0.4317 | -0.1377 |
| OSJNBa0039N21.9   | Putative Glycosyltransferase Protein        | At1g18580 | GAUT11 (Galacturonosyltransferase 11); Polygalacturonate 4-Alpha-Galacturonosyltransferase | 0.2764 | 4.4416 | 1 | 45.9410 | -0.1687 | -0.0571 |
| OSJNBa0041C07.40  | Putative Leucyl-Trna Synthetase             | At1g09620 | ATP Binding / Aminoacyl-Trna Ligase                                                        | 0.2296 | 3.9567 | 1 | 43.3070 | -0.3159 | -0.0119 |
| OSJNBa0042H24.8-2 | Bystin (51.6 Kd)-Like                       | At1g31660 | Unknown Protein                                                                            | 0.2760 | 3.8511 | 1 | 46.7580 | -0.2134 | -0.0316 |
| OSJNBa0050E08.8   | Putative Alcohol Dehydrogenase              | At1g64710 | Oxidoreductase/ Zinc Ion Binding                                                           | 0.2951 | 3.3563 | 1 | 65.1520 | -0.4795 | -0.0711 |
| OSJNBa0052K01.17  | Putative ADP/ATP Translocase                | At5g56450 | Substrate Carrier Family Protein                                                           | 0.2664 | 3.6006 | 1 | 64.4260 | -0.4141 | -0.0380 |
| OSJNBa0053C23.5   | Unknown Protein                             | At4g25660 | Unknown Protein                                                                            | 0.2896 | 3.7633 | 1 | 70.3060 | -0.3237 | -0.0455 |
| OSJNBa0054K20.17  | Diacylglycerol Kinase-Like                  | At4g30340 | ATDGK7 (DIACYLGLYCEROL KINASE 7); Diacylglycerol Kinase                                    | 0.3701 | 4.0242 | 1 | 51.2300 | -0.1564 | -0.0531 |
| OSJNBa0054K20.36  | Putative Dem Protein                        | At3g19240 | Unknown Protein                                                                            | 0.3197 | 4.5357 | 1 | 68.6110 | -0.5069 | -0.0314 |
| OSJNBa0055C08.14  | Unknown Protein                             | At4g24990 | ATGP4 (Arabidopsis Thaliana Geranylgeranylated Protein)                                    | 0.2933 | 1.6259 | 1 | 64.2860 | -0.5326 | -0.0622 |
| OSJNBa0056G17.7   | Unknown Protein                             | At5g45410 | Unknown Protein                                                                            | 0.4379 | 1.7909 | 1 | 46.9030 | -0.0019 | -0.0295 |
| OSJNBa0060D06.18  | Unknown Protein                             | At3g13320 | CAX2 (CATION EXCHANGER 2); Calcium:Hydrogen Antiporter                                     | 0.2519 | 1.8479 | 1 | 43.5770 | 0.1216  | -0.0333 |
| OSJNBa0061L20.103 | Putative Zinc Transporter Protein ZIP1      | At1g05300 | ZIP5 (ZINC TRANSPORTER 5 PRECURSOR); Cation Transporter                                    | 0.4482 | 4.1577 | 1 | 93.9480 | -0.4258 | -0.0546 |
| OSJNBa0063K04.14  | Pentatricopeptide (PPR) Repeat-Containing   | At4g01400 | Pentatricopeptide (PPR) Repeat-Containing Protein                                          | 0.1453 | 3.0704 | 1 | 58.4070 | -0.0546 | -0.0555 |
| OSJNBa0064D20.9   | Unknown Protein                             | At5g08500 | Transmembrane CLPTM1 Family Protein                                                        | 0.153  | 4.4529 | 1 | 52.0210 | -0.0692 | -0.0516 |

|                    |                                                 |           |                                                                                                                                     |            |        |   |         |         |         |
|--------------------|-------------------------------------------------|-----------|-------------------------------------------------------------------------------------------------------------------------------------|------------|--------|---|---------|---------|---------|
|                    |                                                 |           |                                                                                                                                     | 6          |        |   |         |         |         |
| OSJNBa0064E16.11   | Unknown Protein                                 | At5g48750 | Auxin-Responsive Protein, Putative                                                                                                  | 0.752<br>1 | 3.6443 | 1 | 95.8330 | -0.2934 | -0.1181 |
| OSJNBa0064E16.15   | Unknown Protein                                 | At5g55530 | C2 Domain-Containing Protein                                                                                                        | 0.479<br>2 | 4.1649 | 1 | 49.4680 | -0.3545 | -0.0221 |
| OSJNBa0068A07.14   | Putative Translation Initiation Factor 2B Beta  | At3g07300 | GTP Binding / Translation Initiation Factor                                                                                         | 0.222<br>5 | 1.6346 | 1 | 43.9900 | -0.3566 | -0.0435 |
| OSJNBa0068L06.9    | Unknown Protein                                 | At1g06200 | Serine-Type Peptidase                                                                                                               | 0.335<br>5 | 1.7749 | 1 | 54.6390 | -0.1668 | -0.0524 |
| OSJNBa0070C17.23   | Unknown Protein                                 | At2g35060 | KUP11 (K+ Uptake Permease 11); Potassium Ion Transporter                                                                            | 0.199<br>8 | 1.5766 | 1 | 53.2300 | -0.3677 | -0.0126 |
| OSJNBa0073A18.26-1 | Unknown Protein                                 | At5g42570 | Unknown Protein                                                                                                                     | 0.423<br>4 | 1.8549 | 1 | 70.8740 | -0.6031 | -0.0761 |
| OSJNBa0073A21.8-1  | Putative Cytochrome P450                        | At4g15110 | CYP97B3 (Cytochrome P450, Family 97, Subfamily B, Polypeptide 3); Oxygen Binding                                                    | 0.213<br>9 | 1.8190 | 1 | 50.4660 | -0.1566 | -0.0424 |
| OSJNBa0073L01.13   | Hypothetical Protein                            | At4g38270 | GAUT3 (Galacturonosyltransferase 3); Polygalacturonate 4-Alpha-Galacturonosyltransferase/ Transferase, Transferring Glycosyl Groups | 0.312<br>4 | 2.7820 | 1 | 51.2910 | -0.0738 | -0.0187 |
| OSJNBa0075A22.20   | TATA-Binding Protein TBP2                       | At1g55520 | TBP2 (TATA Binding Protein 2); DNA Binding / RNA Polymerase II Transcription Factor                                                 | 0.045<br>3 | 3.7557 | 1 | 46.3540 | -0.1984 | -0.0837 |
| OSJNBa0081P02.7    | Unknown Protein                                 | At1g73500 | ATMKK9 (Arabidopsis Thaliana MAP Kinase Kinase 9); Kinase                                                                           | 0.508<br>1 | 4.0719 | 1 | 92.4530 | -0.4380 | -0.0292 |
| OSJNBa0083N12.20   | Unknown Protein                                 | At1g64850 | Calcium-Binding EF Hand Family Protein                                                                                              | 0.358<br>6 | 3.5304 | 1 | 91.7720 | -0.4888 | -0.0913 |
| OSJNBa0088H09.6    | Unknown Protein                                 | At5g41260 | Protein Kinase Family Protein                                                                                                       | 0.227<br>5 | 4.4032 | 1 | 47.4730 | -0.2472 | -0.0486 |
| OSJNBa0089K24.15   | Putative MRP-Like ABC Transporter               | At3g13080 | ATMRP3 (Arabidopsis Thaliana Multidrug Resistance-Associated Protein 3)                                                             | 0.318<br>8 | 2.6248 | 1 | 63.2100 | -0.3346 | -0.0137 |
| OSJNBa0090O10.19   | Putative Inner Membrane Protein                 | At1g72750 | ATTIM23-2 (Arabidopsis Thaliana Translocase Inner Membrane Subunit 23-2); Protein Translocase                                       | 0.343<br>5 | 3.6816 | 1 | 94.1800 | -0.4742 | -0.0990 |
| OSJNBa0090O10.21   | Hypothetical Protein                            | At1g01220 | GHMP Kinase-Related                                                                                                                 | 0.295<br>5 | 1.8900 | 1 | 47.3430 | -0.3511 | -0.0197 |
| OSJNBa0093O08.1    | Unknown Protein                                 | At1g56130 | Leucine-Rich Repeat Family Protein / Protein Kinase Family Protein;                                                                 | 0.541<br>0 | 3.5231 | 1 | 62.4060 | -0.2482 | -0.0878 |
| OSJNBa0094J08.29   | Putative Protein Kinase                         | At3g27560 | ATN1; Kinase/ Protein Threonine/Tyrosine Kinase                                                                                     | 0.382<br>5 | 2.3417 | 1 | 52.3940 | -0.3380 | -0.0287 |
| OSJNBb0004A17.3    | Unknown Protein                                 | At3g02720 | DJ-1 Family Protein / Protease-Related                                                                                              | 0.169<br>7 | 1.6746 | 1 | 48.9190 | -0.2271 | -0.0367 |
| OSJNBb0006L10.5    | Putative Spermine Synthase                      | At5g19530 | Acl5 (Acaulis 5)                                                                                                                    | 0.258<br>3 | 4.1250 | 1 | 74.8430 | -0.3296 | -0.0238 |
| OSJNBb0015I02.16   | Putative Phosphatase                            | At3g58490 | Phosphatidic Acid Phosphatase Family Protein / PAP2 Family Protein                                                                  | 0.351<br>9 | 1.9494 | 1 | 61.4250 | -0.3425 | -0.0318 |
| OSJNBb0017F17.18   | Putative Acyl-Coa Independent Ceramide Synthase | At4g22330 | ATCES1 (ATCES1); Catalytic                                                                                                          | 0.203<br>2 | 2.3443 | 1 | 47.3900 | -0.1454 | -0.0405 |
| OSJNBb0021O11.8    | Putative Permease                               | At1g49960 | Xanthine/Uracil Permease Family Protein                                                                                             | 0.320<br>1 | 4.5193 | 1 | 81.9390 | -0.3387 | -0.0250 |
| OSJNBb0034G17.19   | Unknown Protein                                 | At2g01480 | Unknown Protein                                                                                                                     | 0.616<br>3 | 4.2363 | 1 | 48.4260 | 0.0816  | -0.0507 |

|                   |                                                 |           |                                                                                                                                                                                                             |        |        |   |         |         |         |
|-------------------|-------------------------------------------------|-----------|-------------------------------------------------------------------------------------------------------------------------------------------------------------------------------------------------------------|--------|--------|---|---------|---------|---------|
| OSJNBb0035I14.16  | Uroporphyrin-III C-Methyltransferase-Like       | At5g40850 | UPM1 (UROPHORPHYRIN METHYLASE 1); Uroporphyrin-III C-Methyltransferase                                                                                                                                      | 0.2736 | 2.2590 | 1 | 60.4970 | -0.4790 | -0.0245 |
| OSJNBb0036F07.7   | Putative ATP Sulfurylase                        | At3g22890 | APS1 (ATP Sulfurylase 3)                                                                                                                                                                                    | 0.2212 | 2.1076 | 1 | 62.9460 | -0.2669 | -0.0486 |
| OSJNBb0039L24.21  | Unknown Protein                                 | At1g63420 | Unknown Protein                                                                                                                                                                                             | 0.5293 | 4.4424 | 1 | 82.9520 | -0.3380 | -0.0441 |
| OSJNBb0041A22.5   | 'Unknown Protein, Contains ACT Domain, PF01842' | At2g39570 | ACT Domain-Containing Protein                                                                                                                                                                               | 0.4396 | 2.9725 | 1 | 59.1220 | -0.0735 | -0.0452 |
| OSJNBb0044I14.4   | Putative Serine /Threonine Kinase Similar To    | At2g02800 | APK2B (PROTEIN KINASE 2B); Kinase                                                                                                                                                                           | 0.2934 | 4.2864 | 1 | 49.5120 | -0.1040 | -0.0376 |
| OSJNBb0053G03.17  | Putative Regulatory Protein NPR1 (Nonexpresser) | At5g45110 | NPR3 (NPR1-LIKE PROTEIN 3); Protein Binding                                                                                                                                                                 | 0.3948 | 4.5346 | 1 | 56.3330 | 0.1638  | -0.0268 |
| OSJNBb0059K02.15  | Unknown Protein                                 | At4g34200 | EDA9 (Embryo Sac Development Arrest 9); NAD Binding / Amino Acid Binding / Cofactor Binding / Oxidoreductase, Acting On The CH-OH Group Of Donors, NAD Or NADP As Acceptor / Phosphoglycerate Dehydrogenase | 0.2019 | 1.3993 | 1 | 58.0870 | -0.6057 | -0.0183 |
| OSJNBb0060J21.23  | Expressed Protein                               | At5g35220 | EGY1 (ETHYLENE-DEPENDENT GRAVITROPISM-DEFICIENT AND YELLOW-GREEN 1); Sterol Regulatory Element-Binding Protein Site 2 Protease                                                                              | 0.1945 | 2.2249 | 1 | 37.9000 | 0.1489  | -0.0303 |
| OSJNBb0062H02.2   | Unknown Protein                                 | At4g10710 | SPT16 (GLOBAL TRANSCRIPTION FACTOR C); Metalloexopeptidase                                                                                                                                                  | 0.2139 | 3.1605 | 1 | 41.7270 | -0.1957 | -0.0096 |
| OSJNBb0064I19.32  | Unknown Protein                                 | At5g27990 | Unknown Protein                                                                                                                                                                                             | 0.6580 | 1.8255 | 1 | 61.7490 | -0.5119 | -0.1192 |
| OSJNBb0072E24.1   | Putative Angio-Associated Migratory Cell        | At4g02730 | Transducin Family Protein / WD-40 Repeat Family Protein                                                                                                                                                     | 1.0649 | 2.6386 | 1 | 47.1430 | 0.0034  | -0.0258 |
| OSJNBb0073N24.1   | Putative Glutamyl-Trna Reductase                | At1g58290 | HEMA1; Glutamyl-Trna Reductase                                                                                                                                                                              | 0.2625 | 4.4780 | 1 | 64.0820 | -0.5049 | -0.0468 |
| OSJNBb0076O03.29  | RNA Helicase-Like                               | At1g32490 | EMB2733/ESP3 (EMBRYO DEFECTIVE 2733); ATP-Dependent RNA Helicase                                                                                                                                            | 0.2021 | 4.8634 | 1 | 39.9790 | -0.0398 | -0.0174 |
| OSJNBb0085F13.13  | Unknown Protein                                 | At1g12550 | Oxidoreductase Family Protein                                                                                                                                                                               | 0.3917 | 4.1173 | 1 | 91.9190 | -0.3667 | -0.0630 |
| OSJNBb0086G17.10  | Putative SMC5 Protein                           | At5g15920 | Structural Maintenance Of Chromosomes (SMC) Family Protein (MSS2)                                                                                                                                           | 0.3324 | 4.9149 | 1 | 47.9340 | -0.2483 | -0.0173 |
| OSJNBb0091N21.29  | Putative Methionine Aminopeptidase              | At2g45240 | MAP1A (METHIONINE AMINOPEPTIDASE 1A); Methionyl Aminopeptidase                                                                                                                                              | 0.1811 | 4.1877 | 1 | 38.6170 | 0.2498  | -0.0527 |
| OSJNBb0092C08.9   | Unknown Protein                                 | At1g16430 | Surfeit Locus Protein 5 Family Protein / SURF5 Family Protein                                                                                                                                               | 0.2854 | 2.0547 | 1 | 63.7680 | -0.2262 | -0.2061 |
| OSJNBb0093E13.11  | Putative Clathrin Assembly Protein              | At4g35410 | Clathrin Adaptor Complex Small Chain Family Protein                                                                                                                                                         | 0.0733 | 3.4787 | 1 | 52.9760 | -0.5010 | -0.0577 |
| OSJNBb0096M04.115 | Unknown Protein                                 | At5g48660 | Unknown Protein                                                                                                                                                                                             | 0.3122 | 3.8335 | 1 | 76.9230 | -0.5396 | -0.1000 |
| OSJNBb0116K07.3   | Unknown Protein                                 | At1g80050 | APT2 (ADENINE PHOSPHORIBOSYL TRANSFERASE 2); Adenine Phosphoribosyltransferase                                                                                                                              | 0.2620 | 2.0646 | 1 | 57.8680 | -0.1287 | -0.0542 |
| P0007D08.23       | Putative PIR7A Protein                          | At1g33990 | Hydrolase, Alpha/Beta Fold Family Protein                                                                                                                                                                   | 0.2479 | 4.1441 | 1 | 64.2470 | -0.5081 | -0.0565 |
| P0009G03.13       | Hypothetical Protein                            | At3g12570 | Fyd                                                                                                                                                                                                         | 0.3216 | 4.4156 | 1 | 51.0980 | -0.0343 | -0.0242 |

|              |                                               |           |                                                                                 |        |        |   |         |         |         |
|--------------|-----------------------------------------------|-----------|---------------------------------------------------------------------------------|--------|--------|---|---------|---------|---------|
| P0010C01.26  | Putative Thioredoxin M-Type, Chloroplast      | At1g76760 | ATY1 (Arabidopsis Thioredoxin Y1); Thiol-Disulfide Exchange Intermediate        | 0.8795 | 2.4702 | 1 | 70.3030 | -0.4297 | -0.0457 |
| P0019D06.2   | Putative AAA-Type ATPase                      | At2g27600 | AAA-Type ATPase Family Protein / Vacuolar Sorting Protein-Related               | 0.1625 | 1.5607 | 1 | 58.4860 | -0.3710 | -0.0287 |
| P0019E03.5   | Hypothetical Protein                          | At3g61750 | Auxin-Responsive Protein -Related                                               | 0.4956 | 4.1990 | 1 | 81.8920 | -0.4547 | -0.0704 |
| P0020D05.9   | Unknown Protein                               | At1g50630 | Extracellular Ligand-Gated Ion Channel                                          | 0.5286 | 4.2318 | 1 | 97.9310 | -0.4586 | -0.0563 |
| P0024G09.11  | Unknown Protein                               | At3g55600 | Unknown Protein                                                                 | 0.4913 | 3.9146 | 1 | 66.9490 | -0.6185 | -0.0356 |
| P0035F12.15  | Putative RecA Protein                         | At2g19490 | RecA Family Protein                                                             | 0.2369 | 2.1083 | 1 | 36.5380 | -0.1881 | -0.0366 |
| P0035F12.16  | Unknown Protein                               | At5g55120 | VTC5; Galactose-1-Phosphate Guanylyltransferase (GDP)                           | 0.4078 | 1.5518 | 1 | 48.4570 | -0.3143 | -0.0247 |
| P0041A24.3   | Unknown Protein                               | At1g10240 | FRS11 (FAR1-RELATED SEQUENCE 11); Zinc Ion Binding                              | 0.2916 | 2.4241 | 1 | 65.7560 | -0.4183 | -0.0293 |
| P0401G10.21  | Putative Glucose Inhibited Division Protein A | At2g13440 | Glucose-Inhibited Division Family A Protein                                     | 0.1904 | 4.6648 | 1 | 40.5710 | 0.1032  | -0.0156 |
| P0407H12.144 | Breast Adenocarcinoma Marker-Like             | At2g06530 | SNF7 Family Protein                                                             | 0.1159 | 3.7349 | 1 | 43.3500 | -0.2517 | -0.0729 |
| P0409B08.21  | Putative Mannose-6-Phosphate Isomerase        | At3g02570 | MEE31 (Maternal Effect Embryo Arrest 31); Mannose-6-Phosphate Isomerase         | 0.3966 | 2.3912 | 1 | 61.1680 | -0.5694 | -0.0449 |
| P0410E03.18  | Unknown Protein                               | At5g27490 | Integral Membrane Yip1 Family Protein                                           | 0.2337 | 4.1021 | 1 | 69.1230 | -0.5216 | -0.0551 |
| P0410E03.26  | Putative GTP-Binding Protein                  | At5g20010 | RAN-1 (Ras-Related GTP-Binding Nuclear Protein 1); GTP Binding                  | 0.0399 | 3.6042 | 1 | 59.5240 | -0.4990 | -0.0661 |
| P0419A09.6-1 | 26S Proteasome Regulatory Particle Triple-A   | At1g45000 | 26S Proteasome Regulatory Complex Subunit P42d, Putative                        | 0.0628 | 3.0483 | 1 | 50.5430 | -0.5646 | -0.0560 |
| P0419H03.37  | Putative Chain C, Structure Of The Plant      | At1g71260 | Atwhy2 (A. Thaliana Whirly 2); Dna Binding                                      | 0.4873 | 2.1788 | 1 | 46.7890 | 0.2341  | -0.0504 |
| P0423B08.13  | Putative I-Box Binding Factor                 | At5g04760 | Myb Family Transcription Factor                                                 | 0.3980 | 3.4084 | 1 | 92.6830 | -0.3660 | -0.0913 |
| P0431B06.16  | Putative NTGP5                                | At1g22050 | Ubiquitin Family Protein                                                        | 0.2236 | 3.3497 | 1 | 57.1430 | -0.0593 | -0.1336 |
| P0435B05.19  | Putative GTP-Binding Protein                  | At2g31060 | GTP Binding / Translation Elongation Factor                                     | 0.1737 | 1.7564 | 1 | 46.0420 | -0.1263 | -0.0312 |
| P0437G01.17  | Unknown Protein                               | At5g57460 | Protein Binding / Protein Transporter                                           | 0.3530 | 4.6558 | 1 | 66.6110 | -0.4279 | -0.0212 |
| P0437H03.127 | Unknown Protein                               | At2g22370 | Unknown Protein                                                                 | 0.1767 | 1.9829 | 1 | 43.0620 | -0.1732 | -0.0750 |
| P0438H08.18  | Putative Vesicle-Associated Membrane          | At2g45140 | Vesicle-Associated Membrane Protein, Putative / VAMP, Putative                  | 0.2561 | 2.0448 | 1 | 56.7570 | -0.2456 | -0.0720 |
| P0441A12.23  | Putative Syringolide-Induced Protein B13-1-1  | At4g39830 | L-Ascorbate Oxidase, Putative                                                   | 0.3070 | 4.3852 | 1 | 98.7410 | -0.4129 | -0.0292 |
| P0445D12.4   | Unknown Protein                               | At1g71070 | Glycosyltransferase Family 14 Protein / Core-2/-Branching Enzyme Family Protein | 0.3644 | 3.1227 | 1 | 65.0130 | -0.2079 | -0.0527 |
| P0451D05.26  | Hypothetical Protein                          | At3g24420 | Hydrolase, Alpha/Beta Fold Family Protein                                       | 0.5314 | 3.8372 | 1 | 93.1410 | -0.3860 | -0.1007 |
| P0453D01.4   | Putative High Affinity Sulfate Transporter    | At4g08620 | SULTR1;1 (Sulfate Transporter 1;1); Sulfate Transporter                         | 0.2570 | 1.5917 | 1 | 45.7140 | -0.0913 | -0.0171 |

|              |                                                |           |                                                                                                    |        |        |   |         |         |         |
|--------------|------------------------------------------------|-----------|----------------------------------------------------------------------------------------------------|--------|--------|---|---------|---------|---------|
| P0453G03.28  | Transporter-Related-Like                       | At5g57100 | Transporter-Related                                                                                | 1.1110 | 4.1900 | 1 | 80.1100 | -0.5575 | -0.0552 |
| P0454A11.12  | NPK1-Related Protein Kinase-Like Protein       | At5g08590 | ASK2 (ARABIDOPSIS SERINE/THREONINE KINASE 2); Kinase                                               | 1.1265 | 4.1394 | 1 | 83.7540 | -0.3409 | -0.0758 |
| P0459B01.40  | Putative Amino Acid Transporter                | At1g31830 | Amino Acid Permease Family Protein                                                                 | 0.2743 | 4.4651 | 1 | 92.7880 | -0.2976 | -0.0565 |
| P0461A06.1   | Unknown Protein                                | At1g16860 | Merozoite Surface Protein-Related                                                                  | 0.1905 | 2.3908 | 1 | 37.9020 | -0.0485 | -0.0282 |
| P0461B08.29  | Putative Cytochrome P450                       | At4g00360 | CYP86A2 (ABERRANT INDUCTION OF TYPE THREE GENES 1); Oxygen Binding                                 | 0.2485 | 4.2856 | 1 | 95.8580 | -0.3864 | -0.0147 |
| P0471A11.34  | LMBR1 Integral Membrane Protein-Like           | At5g65290 | LMBR1 Integral Membrane Family Protein                                                             | 0.2532 | 2.0741 | 1 | 41.7740 | -0.0430 | -0.0184 |
| P0473H02.4   | Putative Glycoprotease                         | At4g22720 | Glycoprotease M22 Family Protein                                                                   | 0.1645 | 4.1875 | 1 | 68.7320 | -0.4278 | -0.0713 |
| P0476H10.42  | Putative Seed Maturation Protein               | At5g22470 | NAD+ ADP-Ribosyltransferase                                                                        | 0.3359 | 4.6458 | 1 | 50.2960 | -0.3457 | -0.0185 |
| P0482D04.9   | Putative Ubiquitin Conjugating Enzyme          | At5g50870 | UBC27 (Ubiquitin-Conjugating Enzyme 26); Ubiquitin-Protein Ligase                                  | 0.2420 | 3.6675 | 1 | 67.9350 | -0.4845 | -0.0554 |
| P0482F12.19  | Putative 28 Kda Golgi SNARE Protein            | At2g45200 | GOS12 (GOLGI SNARE 12); SNARE Binding                                                              | 0.1949 | 3.8668 | 1 | 78.0170 | -0.5693 | -0.1206 |
| P0485B12.35  | Alpha-Expansin                                 | At1g69530 | Atexpa1 (Arabidopsis Thaliana Expansin A1)                                                         | 0.2325 | 3.8187 | 1 | 94.7790 | -0.4658 | -0.0466 |
| P0486F07.29  | Putative Equilibrative Nucleoside Transporter  | At1g70330 | ENT1,AT (EQUILIBRATIVE NUCLEOTIDE TRANSPORTER 1); Nucleoside Transporter                           | 0.2684 | 1.7503 | 1 | 66.6670 | -0.3971 | -0.0176 |
| P0492G09.21  | Putative Cytochrome C1 Precursor               | At5g40810 | Cytochrome C1, Putative                                                                            | 0.1208 | 4.0842 | 1 | 41.9010 | -0.0885 | -0.0507 |
| P0493A04.32  | Unknown Protein                                | At1g02180 | Ferredoxin-Related                                                                                 | 0.6463 | 3.3731 | 1 | 63.5140 | -0.5617 | -0.1314 |
| P0494D11.7   | Putative Phosphoethanolamine                   | At2g38670 | PECT1 (PHOSPHORYLETHANOLAMINE CYTIDYLYLTRANSFERASE 1); Ethanolamine-Phosphate Cytidylyltransferase | 0.3279 | 4.2269 | 1 | 39.1200 | -0.0886 | -0.0336 |
| P0504D03.19  | Unknown Protein                                | At1g51160 | Synbindin, Putative                                                                                | 0.2306 | 3.6105 | 1 | 70.2860 | -0.3664 | -0.1346 |
| P0504E02.3   | Putative Dermal Glycoprotein Precursor         | At1g03230 | Extracellular Dermal Glycoprotein, Putative / EDGP, Putative                                       | 0.7315 | 4.1978 | 1 | 94.1180 | -0.3208 | -0.0249 |
| P0512C01.6   | Hypothetical Protein                           | At4g23440 | Transmembrane Receptor                                                                             | 0.3575 | 3.4267 | 1 | 42.8270 | -0.0801 | -0.0163 |
| P0528B09.25  | Putative CBL-Interacting Protein Kinase        | At4g30960 | CIPK6 (CBL-INTERACTING PROTEIN KINASE 6); Kinase                                                   | 0.3011 | 4.2575 | 1 | 96.2000 | -0.4571 | -0.0251 |
| P0529H11.24  | Ataxin 3-Like Protein                          | At3g54130 | Josephin Family Protein                                                                            | 0.2707 | 3.9131 | 1 | 58.8820 | -0.6036 | -0.0452 |
| P0560B08.106 | Putative Caltractin                            | At3g50360 | ATCEN2 (CENTRIN2); Calcium Ion Binding                                                             | 0.1338 | 3.2715 | 1 | 40.0000 | -0.1383 | -0.1355 |
| P0562A06.20  | Putative Gibberellin Action Negative Regulator | At3g11540 | Spy (Spindly)                                                                                      | 0.1719 | 4.8396 | 1 | 41.8100 | -0.1133 | -0.0174 |
| P0572D06.34  | Putative N7 Protein                            | At4g05490 | F-Box Family Protein (FBL22)                                                                       | 0.6863 | 2.0516 | 1 | 61.8120 | -0.4523 | -0.0759 |
| P0575F10.36  | Putative 3-Isopropylmalate Dehydratase Large   | At4g13430 | Aconitase Family Protein / Aconitate Hydratase Family Protein                                      | 0.1717 | 2.5431 | 1 | 56.5840 | -0.5567 | -0.0304 |
| P0576F08.1-1 | Putative Phosphoribosyl                        | At2g44530 | Ribose-Phosphate Pyrophosphokinase, Putative /                                                     | 0.190  | 2.8029 | 1 | 41.5790 | -0.1319 | -0.0359 |

|                 |                                                     |           |                                                                                                        |            |        |   |         |         |         |  |
|-----------------|-----------------------------------------------------|-----------|--------------------------------------------------------------------------------------------------------|------------|--------|---|---------|---------|---------|--|
|                 | Pyrophosphate Synthase                              |           | Phosphoribosyl Diphosphate Synthetase, Putative                                                        | 5          |        |   |         |         |         |  |
| P0640E12.105    | Peptidyl-Prolyl Cis-Trans Isomerase                 | At3g66654 | Peptidyl-Prolyl Cis-Trans Isomerase Cyclophilin-Type Family Protein                                    | 0.373<br>6 | 3.8356 | 1 | 41.5180 | -0.3059 | -0.0438 |  |
| P0643A10.22     | Putative ADP-Ribosylation Factor                    | At5g37680 | ATARLA1A (ADP-Ribosylation Factor-Like A1A); GTP Binding                                               | 0.059<br>3 | 1.4481 | 1 | 48.5880 | -0.3194 | -0.1005 |  |
| P0663F07.1      | SPX (SYG1/Pho81/XPR1) Domain-Containing             | At1g63010 | SPX (SYG1/Pho81/XPR1) Domain-Containing Protein                                                        | 0.253<br>1 | 1.6175 | 1 | 52.7030 | 0.0074  | -0.0161 |  |
| P0666G04.16     | Unknown Protein                                     | At3g04090 | Sip1;1 (Small And Basic Intrinsic Protein 1a)                                                          | 0.396<br>2 | 1.5755 | 1 | 85.1240 | -0.4389 | -0.0638 |  |
| P0669G09.11     | Putative GDP-Fucose                                 | At3g05320 | Unknown Protein                                                                                        | 0.381<br>9 | 4.3184 | 1 | 49.4000 | -0.1574 | -0.0277 |  |
| P0669G09.15-2   | Putative Porphobilinogen Deaminase                  | At5g08280 | HEMC (HYDROXYMETHYLBILANE SYNTHASE); Hydroxymethylbilane Synthase                                      | 0.185<br>0 | 3.9306 | 1 | 35.7140 | 0.4281  | -0.0534 |  |
| P0671B11.35     | Putative Regulatory Protein NPR1                    | At1g64280 | NPR1 (NONEXPRESSER OF PR GENES 1); Protein Binding                                                     | 0.444<br>1 | 1.6640 | 1 | 60.1110 | -0.1373 | -0.0321 |  |
| P0676G05.8      | Putative Tubulin Gamma-2 Chain (Gamma-2)            | At3g61650 | TUBG1 (GAMMA-TUBULIN); Structural Molecule                                                             | 0.046<br>7 | 1.8143 | 1 | 45.6470 | -0.0800 | -0.0324 |  |
| P0680F05.45     | Putative Tryptophan Synthase Beta-Subunit           | At4g27070 | TSB2 (TRYPTOPHAN SYNTHASE BETA-SUBUNIT); Tryptophan Synthase                                           | 0.185<br>1 | 3.3379 | 1 | 65.1580 | -0.4847 | -0.0550 |  |
| P0681B11.1      | Putative Protein Kinase APK1B                       | At3g13690 | Protein Kinase Family Protein                                                                          | 0.277<br>1 | 4.7184 | 1 | 41.3010 | -0.0629 | -0.0273 |  |
| P0683B11.11     | Putative Embryonic Abundant Protein-Like            | At5g10830 | Embryo-Abundant Protein-Related                                                                        | 0.453<br>2 | 3.8516 | 1 | 94.3550 | -0.4047 | -0.0555 |  |
| P0683F02.2      | Hypothetical Protein                                | At5g05710 | Pleckstrin Homology (PH) Domain-Containing Protein                                                     | 0.168<br>5 | 3.2828 | 1 | 95.2700 | -0.5021 | -0.1525 |  |
| P0683F12.13     | Putative Phosphatidylinositol-Specific              | At3g55940 | Phosphoinositide-Specific Phospholipase C, Putative                                                    | 0.414<br>9 | 4.5339 | 1 | 80.6160 | -0.4177 | -0.0318 |  |
| P0686C03.126    | Unknown Protein                                     | At4g38160 | Pde191 (Pigment Defective 191)                                                                         | 0.360<br>5 | 4.0803 | 1 | 76.4330 | -0.6886 | -0.0387 |  |
| P0710A02.4      | Cytosolic Aldehyde Dehydrogenase                    | At3g48000 | ALDH2B4 (ALDEHYDE DEHYDROGENASE 2); 3-Chloroallyl Aldehyde Dehydrogenase/ Aldehyde Dehydrogenase (NAD) | 0.356<br>1 | 4.3912 | 1 | 90.4860 | -0.5239 | -0.0317 |  |
| P0724B10.42     | Putative Phenylcoumaran Benzylic Ether Reductase    | At4g34540 | Isoflavone Reductase Family Protein                                                                    | 0.354<br>5 | 1.6140 | 1 | 55.5560 | -0.0414 | -0.0722 |  |
| 10A19I.3        | Similar To Gb U43629 Integral Membrane Protein From | At1g19450 | Integral Membrane Protein, Putative / Sugar Transporter Family Protein                                 | 0.205<br>5 | 3.2132 | 2 | 54.6390 | -0.2572 | -0.0351 |  |
| B1026C12.33     | Unknown Protein                                     | At1g61900 | Unknown Protein                                                                                        | 0.429<br>8 | 2.4504 | 2 | 54.8240 | -0.5420 | -0.0286 |  |
| B1046G12.25     | Putative Phosphoribosylaminoimidazole               | At2g37690 | Phosphoribosylaminoimidazole Carboxylase, Putative / AIR Carboxylase, Putative                         | 0.311<br>2 | 1.6345 | 2 | 46.4880 | -0.1763 | -0.0091 |  |
| B1088C09.1      | Hypothetical Protein                                | At2g40400 | Unknown Protein                                                                                        | 0.315<br>1 | 1.6165 | 2 | 47.2140 | -0.1093 | -0.0151 |  |
| B1144B06.21     | Unknown Protein                                     | At1g19130 | Unknown Protein                                                                                        | 0.324<br>0 | 3.6476 | 2 | 61.5380 | -0.5951 | -0.0923 |  |
| H0811E11.2      | Contains Similarity To F6I7.30                      | At4g24820 | 26S Proteasome Regulatory Subunit, Putative (RPN7)                                                     | 0.169<br>7 | 3.6433 | 2 | 70.9840 | -0.5248 | -0.0938 |  |
| I1332.6         | Unknown Protein                                     | At3g62940 | OTU-Like Cysteine Protease Family Protein                                                              | 0.281<br>6 | 2.1755 | 2 | 54.0350 | -0.4220 | -0.0679 |  |
| OJ1005_D12.36-1 | Putative Calcium-Dependent Protein Kinase           | At1g12680 | PEPKR2 (PHOSPHOENOLPYRUVATE CARBOXYLASE-RELATED KINASE 2); Kinase                                      | 0.373<br>6 | 4.3703 | 2 | 63.8100 | -0.3505 | -0.0499 |  |

|                  |                                                  |           |                                                                                                                                        |        |        |   |         |         |         |
|------------------|--------------------------------------------------|-----------|----------------------------------------------------------------------------------------------------------------------------------------|--------|--------|---|---------|---------|---------|
| OJ1005_D12.38    | Putative Succinoaminoimidazolecarboximide        | At3g21110 | PUR7 (Purin 7); Phosphoribosylaminoimidazolesuccinocarboxamide Synthase                                                                | 0.3320 | 1.7523 | 2 | 54.3770 | -0.4539 | -0.0422 |
| OJ1008_E02.6     | Putative Diaminopimelate Decarboxylase           | At3g14390 | Diaminopimelate Decarboxylase, Putative / DAP Carboxylase, Putative                                                                    | 0.2362 | 2.0064 | 2 | 53.9610 | -0.2206 | -0.0182 |
| OJ1079_F11.25-2  | Pentatricopeptide (PPR) Repeat-Containing        | At1g05750 | PDE247 (PIGMENT DEFECTIVE 247); Binding                                                                                                | 0.4315 | 4.2910 | 2 | 92.8060 | -0.4542 | -0.0144 |
| OJ1111_E07.25    | Putative Gamma-Tocopherol Methyltransferase      | At1g64970 | G-Tmt (Gamma-Tocopherol Methyltransferase)                                                                                             | 0.3107 | 4.1547 | 2 | 64.7060 | -0.2329 | -0.0541 |
| OJ1118_A10.27    | Putative Delta-6-Desaturase                      | At2g46210 | Delta-8 Sphingolipid Desaturase, Putative                                                                                              | 0.3271 | 4.2172 | 2 | 87.7190 | -0.4072 | -0.0481 |
| OJ1119_A01.20-1  | Putative Phosphatidylinositol-4-Phosphate        | At3g09920 | PIP5K9 (PHOSPHATIDYL INOSITOL MONOPHOSPHATE 5 KINASE); 1-Phosphatidylinositol-4-Phosphate 5-Kinase                                     | 0.2470 | 4.7647 | 2 | 44.7920 | -0.1263 | -0.0133 |
| OJ1124_H03.5     | Unknown Protein                                  | At4g17420 | Unknown Protein                                                                                                                        | 0.2640 | 3.9453 | 2 | 50.9090 | -0.1252 | -0.0369 |
| OJ1145_E05.10    | Putative U2 Snrnp Protein A'                     | At1g09760 | U2A' (U2 Small Nuclear Ribonucleoprotein A); Protein Binding                                                                           | 0.2131 | 1.8471 | 2 | 48.4380 | -0.1853 | -0.0482 |
| OJ1186_G01.3     | Putative Chitinase Precursor                     | At1g05850 | POM1 (POM-POM1); Chitinase                                                                                                             | 0.3171 | 2.6258 | 2 | 68.1060 | -0.4963 | -0.1228 |
| OJ1263_E10.9     | Putative Phosphatidylserine Synthase             | At1g15110 | Phosphatidyl Serine Synthase Family Protein                                                                                            | 0.2401 | 2.5516 | 2 | 52.7090 | -0.3099 | -0.0284 |
| OJ1340_C08.131   | Putative Eukaryotic Translation Initiation       | At3g55620 | EMB1624 (EMBRYO DEFECTIVE 1624); Translation Initiation Factor                                                                         | 0.0621 | 1.7990 | 2 | 46.5220 | -0.3746 | -0.0412 |
| OJ1567_G09.119   | Putative 60S Ribosomal Protein                   | At3g24830 | 60S Ribosomal Protein L13A (RPL13aB)                                                                                                   | 0.1586 | 3.7248 | 2 | 86.0820 | -0.6284 | -0.0932 |
| OJ1607A12.21     | Putative Sulfate Transporter ATST1               | At3g51895 | SULTR3;1 (SULFATE TRANSPORTER 1); Sulfate Transporter                                                                                  | 0.2118 | 4.5663 | 2 | 90.8790 | -0.3821 | -0.0279 |
| OJ1611_C08.28    | Putative Cyclic Nucleotide-Binding Transporter   | At3g17700 | CNBT1 (CYCLIC NUCLEOTIDE-BINDING TRANSPORTER 1); Calmodulin Binding / Cyclic Nucleotide Binding / Ion Channel                          | 0.3495 | 4.6637 | 2 | 35.3260 | 0.2680  | -0.0091 |
| OJ1643_A10.2     | Putative ADP-Ribosylation Factor-Directed Gtpase | At1g60860 | ARF Gtpase-Activating Domain-Containing Protein                                                                                        | 0.3519 | 4.6554 | 2 | 34.0400 | 0.1855  | -0.0113 |
| OJ1767_D02.9-1   | Emp24/Gp25/P24-Like                              | At1g09580 | Emp24/Gp25/P24 Family Protein                                                                                                          | 0.3203 | 2.9847 | 2 | 58.8240 | -0.0294 | -0.0972 |
| OJ2056_H01.13    | Unknown Protein                                  | At2g42210 | ATOEP16-3; Protein Translocase                                                                                                         | 0.2935 | 3.3589 | 2 | 82.0690 | -0.4811 | -0.1180 |
| OSJNBa0006L06.3  | 60S Ribosomal Protein L21                        | At1g57860 | 60S Ribosomal Protein L21                                                                                                              | 0.0863 | 1.7057 | 2 | 83.4390 | -0.6023 | -0.1579 |
| OSJNBa0008J01.16 | Putative S6 Ribosomal Protein Kinase             | At3g08720 | ATPK19/ATPK2 (ARABIDOPSIS THALIANA SERINE/THREONINE PROTEIN KINASE 19, ARABIDOPSIS THALIANA SERINE/THREONINE PROTEIN KINASE 2); Kinase | 0.1770 | 1.8795 | 2 | 60.4100 | -0.4348 | -0.0232 |
| OSJNBa0008M17.11 | Unknown Protein                                  | At1g31280 | Ago2 (Argonaute 2)                                                                                                                     | 0.5762 | 4.9119 | 2 | 64.3790 | -0.5929 | -0.0230 |
| OSJNBa0013M12.6  | Unknown Protein                                  | At3g21550 | Unknown Protein                                                                                                                        | 0.4393 | 3.5662 | 2 | 97.8950 | -0.4105 | -0.1306 |
| OSJNBa0027P10.1  | Putative Palmitoyl-Protein Thioesterase          | At3g60340 | Palmitoyl Protein Thioesterase Family Protein                                                                                          | 0.2735 | 2.4602 | 2 | 54.3170 | -0.1283 | -0.0556 |
| OSJNBa0027P10.8  | Putative Casein Kinase II Beta                   | At2g44680 | CKB4 (CASEIN KINASE II BETA SUBUNIT 4);                                                                                                | 0.192  | 3.8947 | 2 | 53.0530 | -0.1105 | -0.0511 |



|                     |                                              |           |                                                                                                      |        |        |   |         |         |         |
|---------------------|----------------------------------------------|-----------|------------------------------------------------------------------------------------------------------|--------|--------|---|---------|---------|---------|
|                     | Subunit                                      |           | Protein Kinase CK2 Regulator                                                                         | 4      |        |   |         |         |         |
| OSJNBa0032G11.17    | Putative GDSL-Like Lipase/Acylhydrolase      | At3g48460 | GDSL-Motif Lipase/Hydrolase Family Protein                                                           | 0.3759 | 4.0633 | 2 | 95.7870 | -0.4575 | -0.0305 |
| OSJNBa0032G11.2     | Putative Oxidoreductase                      | At4g10020 | Short-Chain Dehydrogenase/Reductase (SDR) Family Protein                                             | 0.2907 | 4.1849 | 2 | 93.3730 | -0.4184 | -0.0507 |
| OSJNBa0040E01.26    | Putative Ankyrin                             | At2g03430 | Ankyrin Repeat Family Protein                                                                        | 0.3195 | 1.5540 | 2 | 54.4300 | -0.5513 | -0.0976 |
| OSJNBa0047G15.10    | Hypothetical Protein                         | At3g07510 | Unknown Protein                                                                                      | 0.3501 | 3.5781 | 2 | 97.9490 | -0.4158 | -0.0764 |
| OSJNBa0053L11.25    | F-Box Family Protein-Like                    | At1g56240 | ATPP2-B13 (Phloem Protein 2-B13)                                                                     | 0.7745 | 2.2719 | 2 | 66.4180 | -0.3862 | -0.0717 |
| OSJNBa0058K23.10    | Unknown Protein                              | At2g02870 | Kelch Repeat-Containing F-Box Family Protein                                                         | 0.5277 | 4.1933 | 2 | 45.2870 | -0.1315 | -0.0220 |
| OSJNBa0059G06.22    | Putative Gibberelin 20-Oxidase               | At4g25420 | GA5 (GA REQUIRING 5); Gibberellin 20-Oxidase/Gibberellin 3-Beta-Dioxygenase                          | 0.3408 | 4.0519 | 2 | 92.8990 | -0.3360 | -0.0365 |
| OSJNBa0061L20.107-1 | Putative Nucleic Acid Binding Protein        | At3g11200 | PHD Finger Family Protein                                                                            | 0.2025 | 3.7908 | 2 | 75.6640 | -0.3577 | -0.0738 |
| OSJNBa0073E02.3     | Unknown Protein                              | At1g08630 | Tha1 (Threonine Aldolase 1)                                                                          | 0.2949 | 1.9190 | 2 | 55.0900 | -0.4439 | -0.0676 |
| OSJNBa0076F20.1     | Putative Glycine Decarboxylase Subunit       | At1g32470 | Glycine Cleavage System H Protein                                                                    | 0.2141 | 1.6304 | 2 | 71.7110 | -0.3531 | -0.0988 |
| OSJNBa0081C01.8     | Unknown Protein                              | At1g51740 | SYP81 (Syntaxin 81)                                                                                  | 0.3599 | 3.6258 | 2 | 48.0970 | -0.3697 | -0.0671 |
| OSJNBa0085K21.46    | Putative TIP120 Protein                      | At2g02560 | CAND1 (CULLIN-ASSOCIATED AND NEDDYLATION DISSOCIATED, HEMIVENATA); Binding                           | 0.1616 | 5.0723 | 2 | 38.8060 | -0.1199 | -0.0062 |
| OSJNBa0090O10.25    | Hypothetical Protein                         | At4g24050 | Short-Chain Dehydrogenase/Reductase (SDR) Family Protein                                             | 0.2642 | 4.1384 | 2 | 91.5360 | -0.4263 | -0.0554 |
| OSJNBa0094F01.10    | Unknown Protein                              | At1g04230 | Unknown Protein                                                                                      | 0.3411 | 2.2512 | 2 | 46.4650 | -0.1937 | -0.0686 |
| OSJNBb0012A20.16    | Putative Endosomal Protein                   | At1g14670 | Endomembrane Protein 70, Putative                                                                    | 0.1443 | 1.7746 | 2 | 55.4620 | -0.4046 | -0.0332 |
| OSJNBb0013K08.3     | Putative Calcineurin B-Like Protein          | At4g26570 | Atcb3 (Calcineurin B-Like 3)                                                                         | 0.0700 | 3.8235 | 2 | 52.9410 | -0.2507 | -0.0991 |
| OSJNBb0017F17.13    | Silencing Group B Protein                    | At1g03150 | GCN5-Related N-Acetyltransferase (GNAT) Family Protein                                               | 0.0746 | 2.1488 | 2 | 62.5770 | -0.1369 | -0.0431 |
| OSJNBb0028C01.26    | Unknown Protein                              | At3g61060 | Atp2-A13                                                                                             | 0.3480 | 3.9905 | 2 | 69.7280 | -0.4521 | -0.0465 |
| OSJNBb0035N21.18    | Putative Polyprenyl Diphosphate Synthase,    | At1g78510 | Solaneyl Diphosphate Synthase (SPS)                                                                  | 0.2475 | 4.1600 | 2 | 46.2910 | 0.1438  | -0.0300 |
| OSJNBb0036F07.15    | Putative Cop-Coated Vesicle Membrane Protein | At3g22845 | Emp24/Gp25/P24 Protein-Related                                                                       | 0.2086 | 1.6077 | 2 | 63.7760 | 0.0880  | -0.0719 |
| OSJNBb0040H10.26    | MADS Box Protein, MADS2                      | At1g69120 | AP1 (APETALA1); DNA Binding / Transcription Factor                                                   | 0.4236 | 3.7494 | 2 | 55.3100 | 0.1418  | -0.0394 |
| OSJNBb0048O22.8     | Putatputative ABC Transporter                | At2g29940 | ATPDR3/PDR3 (PLEIOTROPIC DRUG RESISTANCE 3); Atpase, Coupled To Transmembrane Movement Of Substances | 0.2668 | 2.8067 | 2 | 42.2710 | 0.2624  | -0.0116 |
| OSJNBb0062H02.3     | Unknown Protein                              | At3g25420 | SCPL21 (Serine Carboxypeptidase-Like 21); Serine Carboxypeptidase                                    | 0.3632 | 2.5963 | 2 | 59.0340 | -0.1242 | -0.0337 |
| OSJNBb0080H08.3     | Unknown Protein                              | At1g60500 | Dynamin Family Protein                                                                               | 0.443  | 4.5786 | 2 | 93.1360 | -0.4674 | -0.0163 |

|                  |                                              |           |                                                                                            |        |        |   |         |         |         |
|------------------|----------------------------------------------|-----------|--------------------------------------------------------------------------------------------|--------|--------|---|---------|---------|---------|
|                  |                                              |           |                                                                                            | 3      |        |   |         |         |         |
| OSJNBb0091E11.4  | Unknown Protein                              | At4g34530 | Basic Helix-Loop-Helix (Bhlh) Family Protein                                               | 1.1848 | 3.0786 | 2 | 70.9460 | -0.4670 | -0.0494 |
| OSJNBb0094K03.15 | Unknown Protein                              | At3g24180 | Catalytic                                                                                  | 0.1837 | 2.7019 | 2 | 41.0380 | 0.1915  | -0.0365 |
| OSJNBb0108E17.13 | Putative NADH-Ubiquinone Oxidoreductase      | At4g02580 | NADH-Ubiquinone Oxidoreductase 24 Kda Subunit, Putative                                    | 0.1511 | 4.7965 | 2 | 53.5430 | -0.2483 | -0.0781 |
| P0006C08.21      | Putative Vacuolar Protein Sorting            | At3g47810 | MAG1 (MAIGO 1); Protein Serine/Threonine Phosphatase                                       | 0.0665 | 3.6604 | 2 | 80.2200 | -0.5230 | -0.1207 |
| P0408C03.8       | Putative Ubiquitin Carrier Protein UBC7      | At3g46460 | UBC13 (Ubiquitin-Conjugating Enzyme 13); Ubiquitin-Protein Ligase                          | 0.0817 | 3.4838 | 2 | 48.1250 | -0.2196 | -0.0964 |
| P0423A12.19      | Hypothetical Protein                         | At3g62770 | Atatg18a (Arabidopsis Thaliana Homolog Of Yeast Autophagy 18 (ATG18) A)                    | 0.3082 | 4.3293 | 2 | 63.1580 | -0.2805 | -0.0256 |
| P0438H08.20      | Putative Ribosomal Protein L34               | At1g26880 | 60S Ribosomal Protein L34 (RPL34A)                                                         | 0.1005 | 3.2594 | 2 | 73.0430 | -0.4597 | -0.1500 |
| P0450B04.21      | Putative Shwachman-Bodian-Diamond Syndrome   | At1g43860 | Transcription Factor                                                                       | 0.3045 | 4.1017 | 2 | 70.1860 | -0.4196 | -0.0482 |
| P0452F10.19      | Putative Caulobacter Crescentus D-Isomer     | At1g79870 | Oxidoreductase Family Protein                                                              | 0.2708 | 3.9430 | 2 | 96.6890 | -0.4589 | -0.0573 |
| P0472F10.2       | Putative Serine Decarboxylase                | At1g43710 | EMB1075 (EMBRYO DEFECTIVE 1075); Carboxy-Lyase                                             | 0.1808 | 4.3969 | 2 | 66.6670 | -0.4721 | -0.0373 |
| P0473D02.40-1    | N-Acetylglucosaminyltransferase-Like Protein | At1g03520 | Glycosyltransferase Family 14 Protein / Core-2/-Branching Enzyme Family Protein            | 0.2923 | 4.3299 | 2 | 72.7070 | -0.4594 | -0.0624 |
| P0474F11.25-1    | Putative Fibrillarin                         | At4g25630 | Fib2 (Fibrillarin 2)                                                                       | 0.1452 | 1.5434 | 2 | 64.2860 | -0.4915 | -0.0477 |
| P0474F11.8       | Protein Phosphatase                          | At2g39840 | TOPP4 (Type One Serine/Threonine Protein Phosphatase 4); Protein Phosphatase Type 1        | 0.1611 | 4.0539 | 2 | 52.6670 | -0.2045 | -0.0472 |
| P0487E11.17      | Putative GTP-Binding Protein                 | At4g02080 | ASAR1 (Arabidopsis Thaliana Secretion-Associated RAS Super Family 2); GTP Binding          | 0.0532 | 3.6367 | 2 | 72.5270 | -0.6617 | -0.0964 |
| P0491F11.2       | Hypothetical Protein                         | At1g72140 | Proton-Dependent Oligopeptide Transport (POT) Family Protein                               | 0.4655 | 4.4213 | 2 | 94.2490 | -0.4191 | -0.0370 |
| P0504A05.26      | Putative Calmodulin-Binding Protein          | At4g25800 | Calmodulin-Binding Protein                                                                 | 0.3779 | 4.3994 | 2 | 41.6960 | 0.0118  | -0.0381 |
| P0504D03.20      | Unknown Protein                              | At3g23620 | Brix Domain-Containing Protein                                                             | 0.2816 | 2.0108 | 2 | 57.4390 | -0.5795 | -0.0655 |
| P0518F01.5       | Unknown Protein                              | At4g29480 | ATP Synthase G Subunit Family Protein                                                      | 0.2492 | 1.9271 | 2 | 71.4290 | -0.1689 | -0.1959 |
| P0519A12.14      | Putative Glutaredoxin I                      | At1g77370 | Glutaredoxin, Putative                                                                     | 0.3455 | 2.8738 | 2 | 51.1810 | -0.3637 | -0.1168 |
| P0524F03.27      | Putative Golgi SNARE Protein                 | At1g15880 | GOS11 (GOLGI SNARE 11); SNARE Binding                                                      | 0.1838 | 3.7467 | 2 | 39.1300 | 0.0930  | -0.0945 |
| P0534H07.34      | Putative Z-Protein                           | At1g03070 | Glutamate Binding                                                                          | 0.2333 | 3.7918 | 2 | 87.8660 | -0.5117 | -0.0631 |
| P0552F09.120     | Putative Alanine Aminotransferase            | At1g72330 | Ala22 (Alanine Aminotransferase 2)                                                         | 0.1463 | 1.7416 | 2 | 40.0000 | 0.1774  | -0.0455 |
| P0560C03.1       | Putative Threonine Synthase                  | At4g29840 | MTO2 (METHIONINE OVER-ACCUMULATOR); Threonine Synthase                                     | 0.2320 | 4.3971 | 2 | 83.3330 | -0.5531 | -0.0223 |
| P0562A06.21      | Cyclophilin                                  | At2g36130 | Peptidyl-Prolyl Cis-Trans Isomerase, Putative / Cyclophilin, Putative / Rotamase, Putative | 0.1081 | 3.5650 | 2 | 62.5810 | -0.3100 | -0.1317 |
| P0562A06.8       | Putative Vesicle-Associated                  | At3g54300 | ATVAMP727 (Arabidopsis Thaliana Vesicle-                                                   | 0.148  | 3.7780 | 2 | 70.7960 | -0.5034 | -0.0589 |

|                 |                                               |           |                                                                |        |        |   |         |         |         |
|-----------------|-----------------------------------------------|-----------|----------------------------------------------------------------|--------|--------|---|---------|---------|---------|
|                 | Membrane Protein 725                          |           | Associated Membrane Protein 727)                               | 5      |        |   |         |         |         |
| P0585B01.29-2   | Putative HGA1                                 | At3g18170 | Unknown Protein                                                | 0.4869 | 4.0080 | 2 | 89.6070 | -0.4860 | -0.0299 |
| P0618H09.21     | Putative Pectinesterase                       | At3g14310 | ATPME3 (Arabidopsis Thaliana Pectin Methyltransferase 3)       | 0.4894 | 4.4153 | 2 | 95.3490 | -0.3948 | -0.0090 |
| P0627E10.6      | Putative Peroxidase                           | At2g37130 | Peroxidase 21 (PER21) (P21) (PRXR5)                            | 0.3622 | 3.9251 | 2 | 91.9610 | -0.3381 | -0.0706 |
| P0671D01.17     | Putative Nifu-Like Protein                    | At3g01020 | ATISU2/ISU2 (Iscu-Like 2); Structural Molecule                 | 0.2890 | 3.6120 | 2 | 75.4720 | -0.3968 | -0.1357 |
| P0671D01.25     | Putative Aspartic Protease                    | At4g04460 | Aspartyl Protease Family Protein                               | 0.4202 | 1.9774 | 2 | 55.6660 | -0.5991 | -0.0264 |
| P0692C11.26     | Putative Vesicle Transport V-SNARE Protein    | At3g29100 | VT113 (Vesicle Transport V-SNARE 13); SNARE Binding / Receptor | 0.2031 | 3.8492 | 2 | 60.8910 | -0.5306 | -0.0824 |
| P0700A11.12     | Putative Vacuolar ATP Synthase Subunit D      | At3g28715 | H+-Transporting Two-Sector Atpase, Putative                    | 0.0633 | 4.0187 | 2 | 55.0000 | -0.1083 | -0.0607 |
| P0700F06.36     | Putative Leucine Aminopeptidase               | At2g24200 | Cytosol Aminopeptidase                                         | 0.1571 | 1.7937 | 2 | 55.9080 | -0.4867 | -0.0221 |
| P0707C02.28     | Putative Phosphofructokinase                  | At2g22480 | Phosphofructokinase Family Protein                             | 0.1721 | 4.2802 | 2 | 35.1530 | 0.0612  | -0.0254 |
| P0711F01.56-1   | Voltage-Dependent Anion Channel               | At3g01280 | Porin, Putative                                                | 0.2475 | 2.5263 | 2 | 56.9290 | -0.4019 | -0.0799 |
| P0711H09.10-1   | Putative AT-Hook DNA-Binding Protein          | At2g33620 | DNA-Binding Family Protein / AT-Hook Protein 1 (AHP1)          | 0.3565 | 1.8935 | 2 | 51.1900 | 0.1403  | -0.1062 |
| P0712E02.24     | Unknown Protein                               | At1g69800 | CBS Domain-Containing Protein                                  | 0.2888 | 2.1143 | 2 | 41.6670 | -0.2021 | -0.0098 |
| OJ1115_A05.19   | Putative ASC1                                 | At1g13580 | Lag13 (Lag1 Longevity Assurance Homolog 3)                     | 0.2152 | 2.5283 | 3 | 45.0510 | -0.0233 | -0.0790 |
| OJ1124_B05.9    | Putative UVB-Resistance Protein UVR8          | At5g16040 | Regulator Of Chromosome Condensation (RCC1) Family Protein     | 0.1653 | 2.9537 | 3 | 60.5900 | -0.1520 | -0.0585 |
| OJ1127_E01.118  | Yippee-Like Protein                           | At5g53940 | Yippee Family Protein                                          | 0.4506 | 3.2793 | 3 | 70.8740 | -0.3686 | -0.1045 |
| OJ1150_A11.17   | Putative Cysteine Proteinase                  | At5g50260 | Cysteine Proteinase, Putative                                  | 0.3225 | 4.0908 | 3 | 96.1220 | -0.3759 | -0.0608 |
| OJ1163_G08.29   | Putative Step II Splicing Factor SLU7         | At1g65660 | SMP1 (Swellmap 1); Nucleic Acid Binding                        | 0.1385 | 4.3941 | 3 | 45.7020 | -0.2115 | -0.0284 |
| OJ1186_G01.31   | Putative Signal Recognition Particle Receptor | At5g05670 | Signal Recognition Particle Binding                            | 0.3177 | 2.0494 | 3 | 47.8990 | -0.0646 | -0.0684 |
| OJ1540_H01.2    | Putative Senescence-Associated Protein        | At3g21600 | Senescence/Dehydration-Associated Protein-Related              | 0.7858 | 2.0761 | 3 | 74.8150 | -0.4618 | -0.0124 |
| OJ1548_F12.6    | Putative Methyltransferase                    | At5g57280 | Unknown Protein                                                | 0.2408 | 1.5710 | 3 | 51.0790 | -0.1104 | -0.0502 |
| OJ1562_H01.5    | Putative Cdc2 Protein Kinase                  | At5g10270 | CDKC;1 (CYCLIN-DEPENDENT KINASE C;1); Kinase                   | 0.1487 | 4.3894 | 3 | 50.8100 | 0.1979  | -0.0505 |
| OJ1634_H04.114  | Putative DNA-Directed RNA Polymerase lia      | At5g51940 | DNA-Directed RNA Polymerase II, Putative                       | 0.1477 | 1.4128 | 3 | 46.2180 | -0.2125 | -0.0768 |
| OJ1643_A10.33-1 | Putative Carboxypeptidase D                   | At5g23210 | Scpl34                                                         | 0.3067 | 4.3214 | 3 | 85.1290 | -0.5427 | -0.0293 |
| OJ991113_30.4   | Unknown Protein                               | At5g03860 | Malate Synthase, Putative                                      | 0.2050 | 4.4571 | 3 | 96.9580 | -0.3966 | -0.0369 |
| OSJNBa0009C07.5 | Unknown Protein                               | At1g64110 | AAA-Type Atpase Family Protein                                 | 0.269  | 4.7809 | 3 | 50.7730 | -0.2350 | -0.0264 |

|                  |                                        |           |                                                                                                                                                                                             |        |        |   |         |         |         |
|------------------|----------------------------------------|-----------|---------------------------------------------------------------------------------------------------------------------------------------------------------------------------------------------|--------|--------|---|---------|---------|---------|
|                  |                                        |           |                                                                                                                                                                                             | 6      |        |   |         |         |         |
| OSJNBa0009H03.25 | Putative Phosphoprotein Phosphatase    | At5g55260 | PPX2 (Protein Phosphatase X-2); Protein Serine/Threonine Phosphatase                                                                                                                        | 0.0468 | 1.6778 | 3 | 42.2150 | 0.0135  | -0.0658 |
| OSJNBa0013D02.6  | Putative Phosphate/Phosphoenolpyruvate | At5g05820 | Phosphate Translocator-Related                                                                                                                                                              | 0.1280 | 2.6135 | 3 | 73.7340 | -0.5283 | -0.0984 |
| OSJNBa0014E22.8  | ABA-Responsive Protein-Like            | At5g13200 | GRAM Domain-Containing Protein / ABA-Responsive Protein-Related                                                                                                                             | 0.6978 | 3.8009 | 3 | 86.6970 | -0.4374 | -0.0690 |
| OSJNBa0020H02.1  | Putative Heat Shock Protein            | At5g15450 | APG6/CLPB-P/CLPB3 (ALBINO AND PALE GREEN 6); ATP Binding / Atpase                                                                                                                           | 0.1391 | 4.8680 | 3 | 43.6870 | -0.0188 | -0.0338 |
| OSJNBa0025J22.9  | Unknown Protein                        | At3g57780 | Unknown Protein                                                                                                                                                                             | 0.4561 | 4.5936 | 3 | 38.6190 | 0.2031  | -0.0090 |
| OSJNBa0026E05.37 | Putative Beta-1,3-Glucanase            | At5g58090 | Glycosyl Hydrolase Family 17 Protein                                                                                                                                                        | 0.3345 | 2.6407 | 3 | 62.4220 | -0.2708 | -0.0307 |
| OSJNBa0026O12.11 | Putative Esterase                      | At5g62930 | GDSL-Motif Lipase/Hydrolase Family Protein                                                                                                                                                  | 0.2353 | 1.4932 | 3 | 48.1980 | -0.0827 | -0.0661 |
| OSJNBa0047E24.9  | Phytochrome C                          | At5g35840 | Phyc (Phytochrome Defective C)                                                                                                                                                              | 0.3210 | 2.2289 | 3 | 58.7790 | -0.6131 | -0.0192 |
| OSJNBa0058G03.4  | Unknown Protein                        | At5g57580 | Calmodulin-Binding Protein                                                                                                                                                                  | 0.3226 | 4.5580 | 3 | 43.4490 | -0.0859 | -0.0290 |
| OSJNBa0059E14.19 | Hypothetical Protein                   | At5g28150 | Unknown Protein                                                                                                                                                                             | 0.2844 | 3.9411 | 3 | 70.1440 | -0.3378 | -0.0729 |
| OSJNBa0061K21.20 | Putative Histone H2A                   | At5g02560 | Histone H2A, Putative                                                                                                                                                                       | 0.3919 | 3.4088 | 3 | 97.0150 | -0.4244 | -0.1288 |
| OSJNBa0079L16.13 | Putative Peptide Transport Protein     | At5g46050 | ATPTR3/PTR3 (PEPTIDE TRANSPORTER PROTEIN 3); Transporter                                                                                                                                    | 0.2643 | 4.5013 | 3 | 96.4290 | -0.4089 | -0.0257 |
| OSJNBa0081C01.11 | Unknown Protein                        | At5g10560 | Glycosyl Hydrolase Family 3 Protein                                                                                                                                                         | 0.3549 | 2.4647 | 3 | 55.2670 | -0.3078 | -0.0192 |
| OSJNBa0081L15.14 | Unknown Protein                        | At5g50320 | ELO3 (ELONGATA 3); N-Acetyltransferase/ Catalytic/ Hydrogen Ion Transporting ATP Synthase, Rotational Mechanism / Hydrogen Ion Transporting Atpase, Rotational Mechanism / Iron Ion Binding | 0.0772 | 2.4282 | 3 | 50.0940 | -0.3105 | -0.0609 |
| OSJNBa0084K01.2  | Unknown Protein                        | At5g20990 | B73 (CHLORATE RESISTANT 6); Molybdenum Ion Binding                                                                                                                                          | 0.2682 | 1.9307 | 3 | 47.9300 | -0.1315 | -0.0404 |
| OSJNBa0084K20.9  | Unknown Protein                        | At5g14230 | Ankyrin Repeat Family Protein                                                                                                                                                               | 0.3866 | 7.4227 | 3 | 90.9950 | -0.4383 | -0.0145 |
| OSJNBa0088A01.16 | Unknown Protein                        | At5g56320 | Atexpa14 (Arabidopsis Thaliana Expansin A14)                                                                                                                                                | 0.4622 | 3.8258 | 3 | 80.8000 | -0.5291 | -0.0405 |
| OSJNBa0088H09.1  | Unknown Protein                        | At5g41180 | Leucine-Rich Repeat Protein Kinase, Putative                                                                                                                                                | 0.4089 | 1.3795 | 3 | 53.5890 | -0.2284 | -0.0636 |
| OSJNBa0088H09.18 | Unknown Protein                        | At5g03540 | (EXOCYST SUBUNIT EXO70 FAMILY PROTEIN A1); Protein Binding                                                                                                                                  | 0.2462 | 1.7640 | 3 | 44.4440 | 0.2111  | -0.0323 |
| OSJNBa0088I06.10 | Unknown Protein                        | At5g21170 | AMP-Activated Protein Kinase                                                                                                                                                                | 0.3696 | 1.8018 | 3 | 55.3900 | -0.0764 | -0.0534 |
| OSJNBa0094J08.6  | Putative Cinnamoyl-Coa Reductase       | At5g58490 | Cinnamoyl-Coa Reductase Family                                                                                                                                                              | 0.2505 | 1.5614 | 3 | 77.9550 | -0.3904 | -0.0422 |
| OSJNBb0013K01.36 | Replication Protein A 70kda            | At2g06510 | Replication Protein, Putative                                                                                                                                                               | 0.3052 | 2.2470 | 3 | 52.5970 | -0.2212 | -0.0309 |
| OSJNBb0022E02.2  | Unknown Protein                        | At1g18470 | Zinc Finger (C3HC4-Type RING Finger) Family Protein                                                                                                                                         | 0.2698 | 1.4964 | 3 | 41.0840 | -0.0436 | -0.0307 |

|                  |                                                  |           |                                                                                            |            |        |   |         |         |         |
|------------------|--------------------------------------------------|-----------|--------------------------------------------------------------------------------------------|------------|--------|---|---------|---------|---------|
| OSJNBb0044B19.4  | Putative Polyubiquitin                           | At5g20620 | UBQ4 (Ubiquitin 4); Protein Binding                                                        | 0.761<br>2 | 1.7742 | 3 | 53.7220 | -0.5510 | -0.0466 |
| OSJNBb0060J21.21 | Expressed Protein                                | At3g03740 | ATBPM4 (BTB-POZ AND MATH DOMAIN 4); Protein Binding                                        | 0.285<br>7 | 4.3185 | 3 | 61.4430 | -0.3481 | -0.0595 |
| OSJNBb0067G11.11 | Unknown Protein                                  | At5g55940 | Emb2731 (Embryo Defective 2731)                                                            | 0.345<br>3 | 2.7703 | 3 | 75.7430 | -0.4239 | -0.0866 |
| OSJNBb0067G11.14 | Unknown Protein                                  | At5g10480 | Pas2 (Pasticcino 2)                                                                        | 0.386<br>7 | 3.7394 | 3 | 64.7890 | -0.3134 | -0.0756 |
| OSJNBb0095H08.30 | Putative Tyrosine Decarboxylase                  | At2g20340 | Tyrosine Decarboxylase, Putative                                                           | 0.209<br>1 | 2.4845 | 3 | 39.0660 | 0.1131  | -0.0382 |
| OSJNBb0106M04.24 | Putative Allene Oxide Synthase                   | At5g42650 | AOS (ALLENE OXIDE SYNTHASE); Hydro-Lyase/<br>Oxygen Binding                                | 0.353<br>8 | 4.3772 | 3 | 98.1560 | -0.3914 | -0.0518 |
| P0003E08.5       | Hypothetical Protein                             | At1g29820 | Unknown Protein                                                                            | 0.314<br>1 | 2.8095 | 3 | 45.8170 | -0.1665 | -0.0366 |
| P0135D07.12      | Dehydration-Responsive Family Protein-Like       | At4g00750 | Dehydration-Responsive Family Protein                                                      | 0.301<br>8 | 4.4865 | 3 | 89.6610 | -0.5261 | -0.0423 |
| P0434A03.107     | Putative Mannose-P-Dolichol Utilization Defect 1 | At5g59470 | PQ-Loop Repeat Family Protein / Transmembrane Family Protein                               | 0.264<br>4 | 1.8120 | 3 | 54.8940 | -0.2697 | -0.0566 |
| P0446B05.2       | Unknown Protein                                  | At5g02190 | PCS1 (PROMOTION OF CELL SURVIVAL1); Aspartic-Type Endopeptidase/ Peptidase                 | 0.443<br>6 | 4.3279 | 3 | 93.7790 | -0.3942 | -0.0090 |
| P0458B05.10      | ATP-Dependent Clp Protease ATP-Binding Subunit   | At5g51070 | ERD1 (EARLY RESPONSIVE TO DEHYDRATION 1); ATP Binding / Atpase                             | 0.313<br>7 | 1.8677 | 3 | 51.5050 | -0.1980 | -0.0225 |
| P0471A11.31-1    | Putative Poly(A) Binding Protein                 | At5g10350 | Polyadenylate-Binding Protein Family Protein / PABP Family Protein                         | 0.184<br>1 | 3.6412 | 3 | 55.4970 | -0.1473 | -0.0538 |
| P0478E02.11      | Unknown Protein                                  | At5g66090 | Unknown Protein                                                                            | 0.308<br>3 | 1.8750 | 3 | 59.7770 | -0.3311 | -0.1191 |
| P0487D09.13      | Ankyrin-Like Protein                             | At2g01680 | Ankyrin Repeat Family Protein                                                              | 0.318<br>3 | 2.7478 | 3 | 55.2210 | -0.4278 | -0.0335 |
| P0492G09.7       | Pir7b Protein (Pseudomonas Inducible Protein)    | At2g23600 | ACL (ACETONE-CYANOHYDRIN LYASE); Hydrolase                                                 | 0.596<br>6 | 3.9185 | 3 | 81.6730 | -0.3014 | -0.0377 |
| P0519E12.121     | Putative Transmembrane Protein                   | At1g14010 | Emp24/Gp25/P24 Family Protein                                                              | 0.339<br>2 | 3.6759 | 3 | 88.3720 | -0.4186 | -0.0974 |
| P0520B06.18      | Unknown Protein                                  | At1g68300 | Universal Stress Protein (USP) Family Protein                                              | 0.454<br>7 | 2.3231 | 3 | 73.4180 | -0.2696 | -0.1246 |
| P0523B07.45      | Putative Protein Kinase G11A                     | At5g47750 | Protein Kinase, Putative                                                                   | 0.241<br>4 | 4.5295 | 3 | 45.4030 | -0.2261 | -0.0152 |
| P0544B02.10      | Putative Glossy1 Protein                         | At5g57800 | WAX2; Catalytic                                                                            | 0.277<br>6 | 4.5247 | 3 | 85.8090 | -0.3538 | -0.0239 |
| P0554D10.3       | Putative Dihydrolipoamide Dehydrogenase          | At1g48030 | Dihydrolipoamide Dehydrogenase 1, Lipoamide Dehydrogenase 1 (MTLPD1)                       | 0.165<br>0 | 2.9238 | 3 | 56.2900 | -0.3741 | -0.0588 |
| P0618H09.15      | Putative Cytoplasmic Ribosomal Protein L18       | At5g27850 | 60S Ribosomal Protein L18 (RPL18C)                                                         | 0.145<br>6 | 3.6868 | 3 | 77.2490 | -0.5019 | -0.0836 |
| P0618H09.27      | Putative Tyrosyl-Trna Synthetase                 | At1g28350 | ATP Binding / Aminoacyl-Trna Ligase                                                        | 0.448<br>8 | 2.6622 | 3 | 39.3260 | 0.1528  | -0.0392 |
| P0628H02.1       | Putative Crooked Neck Protein                    | At5g45990 | Crooked Neck Protein, Putative / Cell Cycle Protein, Putative                              | 0.208<br>2 | 4.5769 | 3 | 58.3990 | -0.5983 | -0.0241 |
| P0643A10.26      | Unknown Protein                                  | At1g23230 | Unknown Protein                                                                            | 0.268<br>5 | 2.5627 | 3 | 39.5080 | 0.0030  | -0.0149 |
| P0646B04.12      | Putative DNA-Directed RNA Polymerase II          | At2g15430 | RBP36A (RNA Polymerase II 36 Kda Polypeptide A); DNA Binding / DNA-Directed RNA Polymerase | 0.205<br>5 | 4.0645 | 3 | 71.6170 | -0.5641 | -0.0755 |

|               |                                            |           |                                                                                                                                |        |        |   |         |         |         |
|---------------|--------------------------------------------|-----------|--------------------------------------------------------------------------------------------------------------------------------|--------|--------|---|---------|---------|---------|
| P0669H03.9    | Putative Cellulose Synthase-8              | At4g39350 | CESA2 (CELLULASE SYNTHASE 2); Cellulose Synthase/ Transferase, Transferring Glycosyl Groups                                    | 0.2038 | 2.9589 | 3 | 53.9360 | -0.3479 | -0.0190 |
| P0676H03.17   | Putative Cytochrome B5 Reductase           | At5g17770 | Atcbr (Nadh:Cytochrome B5 Reductase 1)                                                                                         | 0.1780 | 2.1869 | 3 | 51.1280 | -0.4032 | -0.0907 |
| P0679C12.4    | Hypothetical Protein                       | At1g67190 | F-Box Family Protein                                                                                                           | 0.2299 | 4.2321 | 3 | 43.7340 | -0.2419 | -0.0213 |
| P0685G12.41   | Sucrase-Like Protein                       | At5g55900 | Sucrase-Related                                                                                                                | 0.4982 | 2.1026 | 3 | 58.7130 | -0.5850 | -0.0444 |
| P0708H12.35   | Trehalose-6-Phosphate Phosphatase          | At5g51460 | ATTPPA (Arabidopsis Thaliana Trehalose-6-Phosphate Phosphatase); Trehalose-Phosphatase                                         | 0.3425 | 2.1011 | 3 | 51.1490 | -0.2106 | -0.0461 |
| B1012D10.2    | MCT-1 Protein-Like                         | At1g09150 | Pseudouridine Synthase And Archaeosine Transglycosylase (PUA) Domain-Containing Protein                                        | 0.0888 | 3.5418 | 4 | 43.0230 | -0.3160 | -0.0514 |
| B1064G04.22   | Asparaginyl Endopeptidase                  | At4g32940 | GAMMA-VPE (Vacuolar Processing Enzyme Gamma); Cysteine-Type Endopeptidase                                                      | 0.2579 | 2.5630 | 4 | 61.9960 | -0.6738 | -0.0397 |
| B1064G04.27   | Putative IAA-Ala Hydrolase                 | At1g51760 | IAR3 (IAA-ALANINE RESISTANT 3); Metallopeptidase                                                                               | 0.3285 | 2.9616 | 4 | 59.0360 | -0.4002 | -0.0394 |
| B1130G10.11   | Putative GTP-Binding Protein Rab7a         | At3g18820 | Atrabg3f/Atrab7b (Arabidopsis Rab Gtpase Homolog G3f); GTP Binding                                                             | 0.0674 | 1.9920 | 4 | 55.6700 | -0.4732 | -0.0883 |
| B1151A10.18   | Putative ethylene-Responsive Protein       | At3g16050 | A37 (PYRIDOXINE BIOSYNTHESIS 1.2); Protein Heterodimerization                                                                  | 0.3858 | 3.3005 | 4 | 91.8920 | -0.5081 | -0.1779 |
| B1339H09.19   | Putative Annexin                           | At1g68090 | ANNAT5 (ANN5, ANNEXIN ARABIDOPSIS 5); Calcium Ion Binding / Calcium-Dependent Phospholipid Binding                             | 0.3939 | 4.1168 | 4 | 43.7710 | -0.2298 | -0.0457 |
| H0806H05.2    | Cysteine Synthase                          | At3g61440 | Atcysc1 (Beta-Substituted Ala Synthase 3;1)                                                                                    | 0.2302 | 1.6436 | 4 | 56.3220 | -0.2594 | -0.0477 |
| OJ000126_13.4 | Unknown Protein                            | At2g27460 | Sec23/Sec24 Transport Family Protein                                                                                           | 0.3242 | 2.4150 | 4 | 47.5180 | -0.0631 | -0.0244 |
| OJ1003_F04.28 | Ubiquitin-Associated (UBA)/TS-N            | At1g04850 | Ubiquitin-Associated (UBA)/TS-N Domain-Containing Protein                                                                      | 0.1972 | 2.2242 | 4 | 58.2630 | -0.4885 | -0.0587 |
| OJ1004_A05.39 | Leucine-Rich Repeat-Like Protein           | At1g15740 | Leucine-Rich Repeat Family Protein                                                                                             | 0.2932 | 4.5241 | 4 | 45.7500 | -0.1257 | -0.0196 |
| OJ1004C08.14  | Putative Ubiquitin Protein                 | At2g17190 | Ubiquitin Family Protein                                                                                                       | 0.3417 | 2.3606 | 4 | 45.6650 | -0.2586 | -0.0454 |
| OJ1005_H01.19 | Putative Pectinesterase                    | At5g53370 | Pectinesterase Family Protein                                                                                                  | 0.5744 | 4.4018 | 4 | 96.3300 | -0.4251 | -0.0144 |
| OJ1006_A02.6  | Putative Plastidic ATP/ADP Transporter     | At1g80300 | Chloroplast ADP, ATP Carrier Protein 1 / ADP, ATP Translocase 1 / Adenine Nucleotide Translocase 1 (AATP1)                     | 0.2535 | 4.5973 | 4 | 68.6470 | -0.3480 | -0.0163 |
| OJ1007_D04.18 | Putative ATP Synthase                      | At2g21870 | Unknown Protein                                                                                                                | 0.2772 | 1.7344 | 4 | 48.3570 | -0.4238 | -0.0833 |
| OJ1065_B06.20 | Putative Succinyl-Coa Ligase Alpha Subunit | At5g23250 | Succinyl-Coa Ligase (GDP-Forming) Alpha-Chain, Putative / Succinyl-Coa Synthetase, Alpha Chain, Putative / SCS-Alpha, Putative | 0.1268 | 1.8612 | 4 | 51.4470 | -0.4194 | -0.0767 |
| OJ1077_A12.15 | Putative Aspartate Transaminase            | At2g30970 | Asp1 (Aspartate Aminotransferase 1)                                                                                            | 0.1639 | 1.8621 | 4 | 53.0560 | 0.0388  | -0.0551 |
| OJ1079_F11.26 | Beta 1 Subunit Of 20S Proteasome           | At4g31300 | PBA1 (20S Proteasome Beta Subunit A 1); Peptidase                                                                              | 0.1411 | 1.9339 | 4 | 52.7430 | -0.2279 | -0.0780 |
| OJ1097_A12.2  | 20S Proteasome Beta Subunit                | At5g40580 | PBB2 (20S Proteasome Beta Subunit B 2);                                                                                        | 0.138  | 3.9845 | 4 | 50.3880 | -0.2090 | -0.0555 |

|                  |                                                  |           |                                                                                                                    |            |        |   |         |         |         |
|------------------|--------------------------------------------------|-----------|--------------------------------------------------------------------------------------------------------------------|------------|--------|---|---------|---------|---------|
|                  |                                                  |           | Peptidase                                                                                                          | 3          |        |   |         |         |         |
| OJ1118_B06.10    | Putative Peroxidase                              | At2g22420 | Peroxidase 17 (PER17) (P17)                                                                                        | 0.266<br>9 | 4.0570 | 4 | 94.1350 | -0.4448 | -0.0489 |
| OJ1118_D07.26-1  | Putative Amino Acid Permease                     | At5g49630 | AAP6 (AMINO ACID PERMEASE 6); Amino Acid Permease                                                                  | 0.260<br>9 | 4.3706 | 4 | 84.4540 | -0.4442 | -0.0368 |
| OJ1118_D07.29    | Putative Oslrk1(Receptor-Type Protein Kinase)    | At5g65700 | BAM1 (Big Apical Meristem 1); ATP Binding / Kinase/ Protein Serine/Threonine Kinase                                | 0.237<br>9 | 4.9306 | 4 | 79.9380 | -0.4455 | -0.0184 |
| OJ1118_F05.12    | Unknown Protein                                  | At1g15980 | Hypothetical Protein                                                                                               | 0.349<br>9 | 4.3583 | 4 | 88.9140 | -0.4389 | -0.0247 |
| OJ1119_D01.9     | Helix-Loop-Helix-Like Protein                    | At5g54680 | ILR3 (IAA-LEUCINE RESISTANT3); DNA Binding / Transcription Factor                                                  | 0.370<br>4 | 3.8504 | 4 | 61.4410 | -0.3263 | -0.0569 |
| OJ1123_C12.123   | Calcineurin-Like Phosphoesterase Family-Like     | At1g13900 | Calcineurin-Like Phosphoesterase Family Protein                                                                    | 0.365<br>0 | 4.5803 | 4 | 63.9290 | -0.5053 | -0.0328 |
| OJ1124_D06.18    | Oligopeptidase A-Like                            | At5g65620 | Peptidase M3 Family Protein / Thimet Oligopeptidase Family Protein                                                 | 0.167<br>5 | 2.4809 | 4 | 50.3530 | -0.5489 | -0.0058 |
| OJ1145_F01.1     | Unknown Protein                                  | At1g21060 | Unknown Protein                                                                                                    | 0.130<br>2 | 2.1775 | 4 | 57.9710 | -0.6306 | -0.1528 |
| OJ1172F09.5      | Unknown Protein                                  | At2g20370 | MUR3 (MURUS 3); Catalytic                                                                                          | 0.257<br>4 | 4.4963 | 4 | 66.7270 | -0.5166 | -0.0398 |
| OJ1175_B01.11    | Putative GAMYB-Binding Protein                   | At1g77180 | Chromatin Protein Family                                                                                           | 0.227<br>6 | 4.4529 | 4 | 60.0360 | -0.1641 | -0.0308 |
| OJ1198_B10.9     | Putative ABC Transporter                         | At3g47730 | ATATH1 (ABC2 Homolog 1); Atpase, Coupled To Transmembrane Movement Of Substances                                   | 0.264<br>2 | 3.9401 | 4 | 51.9610 | -0.0750 | -0.0227 |
| OJ1200_C08.124-1 | Calmodulin                                       | At3g43810 | CAM7 (CALMODULIN 7); Calcium Ion Binding                                                                           | 0.008<br>4 | 3.3571 | 4 | 61.0690 | -0.5805 | -0.1221 |
| OJ1211_G06.4     | Putative Calcium-Dependent Protein Kinase        | At1g18890 | ATCDPK1; Calcium- And Calmodulin-Dependent Protein Kinase/ Kinase/ Protein Kinase                                  | 0.359<br>1 | 4.3941 | 4 | 92.8030 | -0.4147 | -0.0412 |
| OJ1234_B11.20    | Putative Alcohol Oxidase                         | At4g28570 | Alcohol Oxidase-Related                                                                                            | 0.417<br>4 | 4.7268 | 4 | 95.7180 | -0.3943 | -0.0269 |
| OJ1288_G09.19    | Putative Elicitor-Inducible Protein ELG-J7       | At2g22170 | Lipid-Associated Family Protein                                                                                    | 0.425<br>9 | 3.5359 | 4 | 94.1180 | -0.3932 | -0.0544 |
| OJ1310_F05.15    | Putative Poly(A)-Binding Protein                 | At4g34110 | PAB2 (POLY(A)-BINDING PROTEIN 2); RNA Binding                                                                      | 0.255<br>0 | 4.5353 | 4 | 53.1850 | -0.4586 | -0.0331 |
| OJ1339_F05.125   | Putative Receptor-Like Protein Kinase            | At5g10020 | Leucine-Rich Repeat Transmembrane Protein Kinase, Putative                                                         | 0.452<br>7 | 2.4806 | 4 | 56.7620 | -0.3638 | -0.0191 |
| OJ1384D03.15     | Putative CELL DIVISION CONTROL PROTEIN 2 HOMOLOG | At3g48750 | CDC2/CDC2A/CDC2AAT/CDK2/CDKA;1 (CELL DIVISION CONTROL 2); Cyclin-Dependent Protein Kinase/ Kinase/ Protein Binding | 0.123<br>9 | 3.8828 | 4 | 47.5840 | -0.2715 | -0.0253 |
| OJ1414_E05.17    | Calcyclin Binding Protein-Like                   | At1g30070 | SGS Domain-Containing Protein                                                                                      | 0.304<br>1 | 3.7721 | 4 | 62.0190 | -0.4547 | -0.1027 |
| OJ1435_F07.31    | Putative 60S Ribosomal Protein L9                | At1g33140 | 60S Ribosomal Protein L9 (RPL90A/C)                                                                                | 0.193<br>0 | 3.4459 | 4 | 84.3930 | -0.5398 | -0.0710 |
| OJ1458_B07.103   | Putative Adapter Protein ATH-55                  | At5g28740 | Transcription-Coupled DNA Repair Protein-Related                                                                   | 0.262<br>0 | 4.8811 | 4 | 60.5520 | -0.5332 | -0.0311 |
| OJ1477_F01.114   | Nucleoid DNA-Binding-Like Protein                | At3g54400 | Aspartyl Protease Family Protein                                                                                   | 0.356<br>6 | 4.2643 | 4 | 98.6520 | -0.2871 | -0.0528 |
| OJ1479_B11.11    | Putative Acyl Carrier Protein III, Chloroplast   | At4g25050 | Acp4 (Acyl Carrier Protein 4)                                                                                      | 0.490<br>8 | 1.9969 | 4 | 50.0000 | -0.3442 | -0.0790 |
| OJ1513_F02.135   | Casein Kinase II Alpha Subunit                   | At3g50000 | CKA2 (Casein Kinase II Alpha Chain 2); Kinase                                                                      | 0.050<br>1 | 1.7676 | 4 | 48.4080 | -0.2314 | -0.0408 |

|                  |                                                  |           |                                                                                                                     |        |        |   |         |         |         |
|------------------|--------------------------------------------------|-----------|---------------------------------------------------------------------------------------------------------------------|--------|--------|---|---------|---------|---------|
| OJ1612_A04.101   | Putative Isopentenyl                             | At3g02780 | IPP2 (ISOPENTENYL PYROPHOSPHATE: DIMETHYLLALLYL PYROPHOSPHATE ISOMERASE 2); Isopentenyl-Diphosphate Delta-Isomerase | 0.1167 | 2.0255 | 4 | 63.2560 | -0.5998 | -0.1042 |
| OJ1643_A10.34    | Putative Ubiquitin-Conjugating Enzyme E2         | At5g25760 | PEX4 (PEROXIN4); Ubiquitin-Protein Ligase                                                                           | 0.0513 | 3.5102 | 4 | 46.0000 | 0.0450  | -0.1000 |
| OJ1666_A04.19    | Putative F0 ATP Synthase D Chain                 | At3g52300 | Atpq (Atp Synthase D Chain)                                                                                         | 0.1463 | 1.9427 | 4 | 70.0680 | -0.5554 | -0.0976 |
| OJ1669_F01.30    | Putative GCPE Protein                            | At5g60600 | Gcpe (CHLOROPLAST BIOGENESIS 4); 4-Hydroxy-3-Methylbut-2-En-1-Yl Diphosphate Synthase                               | 0.1342 | 1.9124 | 4 | 43.4780 | -0.3150 | -0.0328 |
| OJ1695_A02.24    | Phosphatase 2A Regulatory A Subunit              | At3g25800 | PDF1 (65 KDA REGULATORY SUBUNIT OF PROTEIN PHOSPHATASE 2A); Protein Phosphatase Type 2A Regulator                   | 0.0811 | 4.5071 | 4 | 41.8050 | 0.0415  | -0.0211 |
| OJ1705_E12.26    | Putative Citrate Synthase, Glyoxysomal Precursor | At2g42790 | CSY3 (CITRATE SYNTHASE 3); Citrate (SI)-Synthase                                                                    | 0.1459 | 2.2077 | 4 | 47.3680 | -0.2610 | -0.0180 |
| OJ1741_B01.9     | Voltage-Dependent Anion-Selective Channel (VDAC) | At5g15090 | Porin, Putative / Voltage-Dependent Anion-Selective Channel Protein, Putative                                       | 0.3147 | 3.1489 | 4 | 58.9740 | -0.4919 | -0.0539 |
| OJ1743_B12.5     | Putative Serine Carboxypeptidase                 | At1g33540 | SCPL18 (Serine Carboxypeptidase-Like 18); Serine Carboxypeptidase                                                   | 0.5417 | 4.3229 | 4 | 54.2250 | 0.0360  | -0.0379 |
| OJ1743A09.16     | Putative Leucine-Rich Repeat Transmembrane       | At1g48480 | RKL1 (Receptor-Like Kinase 1); ATP Binding / Kinase/ Protein Serine/Threonine Kinase                                | 0.4197 | 4.5935 | 4 | 91.4060 | -0.3512 | -0.0370 |
| OJ1754_E06.14    | Chalcone Isomerase                               | At3g55120 | TT5 (TRANSPARENT TESTA 5); Chalcone Isomerase                                                                       | 0.3907 | 3.8084 | 4 | 95.8530 | -0.3182 | -0.1021 |
| OJ1754_E06.9     | Putative Leukotriene A-4 Hydrolase               | At5g13520 | Peptidase M1 Family Protein                                                                                         | 0.2466 | 2.9703 | 4 | 74.4680 | -0.5526 | -0.0327 |
| OJ1789_C07.10    | Putative Ribosomal Protein L17                   | At1g67430 | 60S Ribosomal Protein L17 (RPL17B)                                                                                  | 0.1455 | 3.4379 | 4 | 66.0490 | -0.4248 | -0.0819 |
| OJ1791_B03.41    | Ankyrin Repeat-Like Protein                      | At3g01750 | Ankyrin Repeat Family Protein                                                                                       | 0.4735 | 4.6266 | 4 | 77.4850 | -0.3816 | -0.0318 |
| OSJNBa0004N05.7  | Unknown Protein                                  | At2g33380 | RD20 (RESPONSIVE TO DESSICATION 20); Calcium Ion Binding                                                            | 0.2916 | 3.9006 | 4 | 69.4690 | -0.1463 | -0.1029 |
| OSJNBa0005K07.2  | Unknown Protein                                  | At4g10440 | Dehydration-Responsive Family Protein                                                                               | 0.2466 | 4.5532 | 4 | 74.2860 | -0.4221 | -0.0131 |
| OSJNBa0006O14.4  | Unknown Protein                                  | At3g18350 | Unknown Protein                                                                                                     | 0.3602 | 1.9524 | 4 | 41.4200 | 0.0221  | -0.0205 |
| OSJNBa0007H12.40 | Putative Isocitrate Lyase                        | At3g21720 | Isocitrate Lyase, Putative                                                                                          | 0.1648 | 4.3341 | 4 | 94.6300 | -0.4346 | -0.0364 |
| OSJNBa0008J01.24 | Putative Avr9/Cf-9 Rapidly Elicited Protein 31   | At4g20780 | Calcium-Binding Protein, Putative                                                                                   | 0.4200 | 3.5676 | 4 | 98.3520 | -0.4602 | -0.1122 |
| OSJNBa0009C07.13 | Putative Peroxisomal Ca-Dependent Solute         | At4g01100 | Substrate Carrier Family Protein                                                                                    | 0.1285 | 1.8015 | 4 | 46.7460 | -0.3602 | -0.0524 |
| OSJNBa0012L23.32 | Putative Transcription Factor                    | At1g73230 | Nascent Polypeptide-Associated Complex (NAC) Domain-Containing Protein                                              | 0.1700 | 2.4270 | 4 | 39.8690 | -0.3040 | -0.0713 |
| OSJNBa0014G15.3  | Putative Reductase                               | At5g37510 | EMB1467 (EMBRYO DEFECTIVE 1467); NADH Dehydrogenase                                                                 | 0.1664 | 2.5521 | 4 | 51.1400 | -0.2980 | -0.0254 |
| OSJNBa0015N08.12 | Putative Transcription Factor                    | At1g17880 | Nascent Polypeptide-Associated Complex (NAC) Domain-Containing Protein / BTF3b-Like Transcription Factor, Putative  | 0.1544 | 1.4554 | 4 | 65.7530 | -0.6537 | -0.1323 |
| OSJNBa0015N08.9  | Putative                                         | At1g01630 | SEC14 Cytosolic Factor, Putative /                                                                                  | 0.370  | 3.6571 | 4 | 93.8780 | -0.5178 | -0.0487 |



|                  |                                            |           |                                                                                                       |        |        |   |         |         |         |
|------------------|--------------------------------------------|-----------|-------------------------------------------------------------------------------------------------------|--------|--------|---|---------|---------|---------|
|                  |                                            |           | Phosphoglyceride Transfer Protein, Putative                                                           | 3      |        |   |         |         |         |
| OSJNBa0017J22.12 | Unknown Protein                            | At3g55070 | Unknown Protein                                                                                       | 0.2910 | 1.9599 | 4 | 66.4910 | -0.4225 | -0.0837 |
| OSJNBa0017N12.8  | Abscisic Acid-Inducible Protein Kinase     | At1g78290 | Serine/Threonine Protein Kinase, Putative                                                             | 0.1536 | 4.0858 | 4 | 61.8750 | -0.4606 | -0.0523 |
| OSJNBa0018H01.7  | Putative Glutathione S-Transferase         | At1g65820 | Microsomal Glutathione S-Transferase, Putative                                                        | 0.2772 | 3.4628 | 4 | 96.5030 | -0.4431 | -0.1061 |
| OSJNBa0018H01.9  | Putative Snrnp Protein                     | At2g33730 | DEAD Box RNA Helicase, Putative                                                                       | 0.1771 | 4.5839 | 4 | 58.8760 | -0.6310 | -0.0245 |
| OSJNBa0019K04.9  | Unknown Protein                            | At5g51750 | Subtilase Family Protein                                                                              | 0.3035 | 4.7927 | 4 | 85.8290 | -0.4180 | -0.0205 |
| OSJNBa0026O12.9  | Hypothetical Protein                       | At3g23300 | Dehydration-Responsive Protein-Related                                                                | 0.2294 | 4.4974 | 4 | 43.1510 | 0.1785  | -0.0318 |
| OSJNBa0029C15.2  | Putative Thioredoxin-Like U5 Small         | At5g08290 | YLS8 (Yellow-Leaf-Specific Gene 8); Catalytic                                                         | 0.0252 | 1.7657 | 4 | 77.4440 | -0.4566 | -0.1162 |
| OSJNBa0032F06.12 | Unknown Protein                            | At5g53470 | Acbp1 (Acyl-Coa Binding Protein)                                                                      | 0.3900 | 3.2815 | 4 | 62.7010 | -0.4970 | -0.0655 |
| OSJNBa0032F06.16 | Unknown Protein                            | At2g45790 | Eukaryotic Phosphomannomutase Family Protein                                                          | 0.1181 | 3.8661 | 4 | 53.2470 | -0.1900 | -0.0661 |
| OSJNBa0038J17.27 | Hypothetical Protein                       | At1g15000 | SCPL50 (Serine Carboxypeptidase-Like 50); Serine Carboxypeptidase                                     | 0.3981 | 4.2441 | 4 | 94.8660 | -0.3733 | -0.0452 |
| OSJNBa0039C07.12 | Unknown Protein                            | At5g13440 | Ubiquinol-Cytochrome C Reductase Iron-Sulfur Subunit, Putative / Rieske Iron-Sulfur Protein, Putative | 0.2519 | 4.0532 | 4 | 66.5410 | -0.5280 | -0.0752 |
| OSJNBa0040D23.4  | Putative Transmembrane Protein             | At1g14530 | (TOM THREE HOMOLOG); Virion Binding                                                                   | 0.1616 | 1.7838 | 4 | 59.4410 | -0.0066 | -0.0796 |
| OSJNBa0041P03.2  | Putative Signal Transduction Protein       | At1g15130 | Hydroxyproline-Rich Glycoprotein Family Protein                                                       | 0.2869 | 2.7907 | 4 | 56.5740 | -0.4870 | -0.0176 |
| OSJNBa0042I09.17 | Putative Receptor-Like Protein Kinase      | At1g34300 | Lectin Protein Kinase Family Protein                                                                  | 0.3695 | 4.7316 | 4 | 96.3500 | -0.4025 | -0.0330 |
| OSJNBa0042I15.10 | Unknown Protein                            | At1g08250 | Prephenate Dehydratase Family Protein                                                                 | 0.2387 | 4.2158 | 4 | 95.9900 | -0.4590 | -0.0389 |
| OSJNBa0042L16.3  | Unknown Protein                            | At4g14110 | Cop9 (Constitutive Photomorphogenic 9)                                                                | 0.3526 | 3.6966 | 4 | 78.7230 | -0.5161 | -0.0520 |
| OSJNBa0043A12.24 | Unknown Protein                            | At1g49820 | ATMTK; S-Methyl-5-Thioribose Kinase                                                                   | 0.2043 | 4.2184 | 4 | 63.7040 | -0.3878 | -0.0549 |
| OSJNBa0053L11.37 | Unknown Protein                            | At3g07090 | Unknown Protein                                                                                       | 0.3351 | 3.9196 | 4 | 94.8720 | -0.3687 | -0.0583 |
| OSJNBa0054K20.22 | Putative Initiation Factor 3g              | At3g11400 | EIF3G1 (Eukaryotic Translation Initiation Factor 3G1); RNA Binding / Translation Initiation Factor    | 0.2181 | 2.5048 | 4 | 63.0600 | -0.5029 | -0.0377 |
| OSJNBa0056G17.13 | Putative Ubiquinone Oxidoreductase Subunit | At3g03100 | Oxidoreductase                                                                                        | 0.2251 | 1.9021 | 4 | 64.3840 | 0.0205  | -0.1038 |
| OSJNBa0057L21.1  | Putative Phragmoplastin                    | At3g60190 | ADL4/ADLP2/DRP1E/EDR3 (DYNAMIN-LIKE PROTEIN 4); GTP Binding / Gtpase                                  | 0.1357 | 4.5400 | 4 | 45.2340 | -0.3952 | -0.0210 |
| OSJNBa0067K08.8  | Unknown Protein                            | At5g16250 | Unknown Protein                                                                                       | 0.3428 | 3.6324 | 4 | 96.2960 | -0.3830 | -0.1249 |
| OSJNBa0070C17.12 | Unknown Protein                            | At1g30630 | Coatomer Protein Epsilon Subunit Family Protein / COPE Family Protein                                 | 0.1444 | 1.4927 | 4 | 59.9260 | -0.4533 | -0.0282 |
| OSJNBa0070M12.12 | Unknown Protein                            | At2g46860 | Inorganic Pyrophosphatase, Putative (Soluble) / Pyrophosphate Phospho-Hydrolase, Putative /           | 0.1159 | 3.5795 | 4 | 49.2460 | -0.5227 | -0.0840 |

|                   |                                                |           |                                                                                                |        |        |   |         |         |         |
|-------------------|------------------------------------------------|-----------|------------------------------------------------------------------------------------------------|--------|--------|---|---------|---------|---------|
|                   |                                                |           | Ppase, Putative                                                                                |        |        |   |         |         |         |
| OSJNBa0071113.13  | Unknown Protein                                | At2g18980 | Peroxidase, Putative                                                                           | 0.4236 | 4.0568 | 4 | 95.4820 | -0.4705 | -0.0659 |
| OSJNBa0072D21.14  | Unknown Protein                                | At2g05170 | ATVPS11 (Arabidopsis Thaliana Vacuolar Protein Sorting 11); Transporter                        | 0.2154 | 1.7429 | 4 | 42.3340 | -0.2702 | -0.0182 |
| OSJNBa0076F20.10  | Putative Cytochrome                            | At5g53560 | ATB5-A (Cytochrome B5 A)                                                                       | 0.2171 | 1.7427 | 4 | 59.6770 | -0.3436 | -0.1239 |
| OSJNBa0076F20.4   | Unknown Protein                                | At1g64980 | Unknown Protein                                                                                | 0.2819 | 3.7767 | 4 | 97.1770 | -0.5122 | -0.0877 |
| OSJNBa0078A17.8   | Putative Splicing Factor                       | At5g06160 | Splicing Factor-Related                                                                        | 0.2549 | 4.3714 | 4 | 51.3760 | -0.3234 | -0.0249 |
| OSJNBa0078D06.37  | Unknown Protein, 5'-Partial                    | At1g20980 | SPL14 (SQUAMOSA PROMOTER BINDING PROTEIN-LIKE 14); DNA Binding / Transcription Factor          | 0.8881 | 3.4762 | 4 | 48.6180 | -0.2087 | -0.0186 |
| OSJNBa0081C13.10  | Sec13p                                         | At2g30050 | Transducin Family Protein / WD-40 Repeat Family Protein                                        | 0.1381 | 4.0689 | 4 | 49.3200 | -0.5617 | -0.0344 |
| OSJNBa0081C13.30  | Putative Splicing Factor 3b, Subunit 3, 130kda | At3g55220 | Splicing Factor, Putative                                                                      | 0.1423 | 2.7028 | 4 | 57.8630 | -0.6003 | -0.0179 |
| OSJNBa0083F15.15  | Putative Ubiquitin Conjugation Factor          | At5g15400 | U-Box Domain-Containing Protein                                                                | 0.3100 | 4.9288 | 4 | 52.2870 | -0.3540 | -0.0224 |
| OSJNBa0084A10.7   | Unknown Protein                                | At1g21760 | F-Box Family Protein                                                                           | 0.2911 | 1.7902 | 4 | 46.1040 | -0.0778 | -0.0363 |
| OSJNBa0085I10.13  | Unknown Protein                                | At5g09400 | KUP7 (K+ Uptake Permease 7); Potassium Ion Transporter                                         | 0.3140 | 1.8195 | 4 | 50.1840 | -0.1125 | -0.0324 |
| OSJNBa0087C10.9   | Synaptobrevin-Like Protein                     | At1g04750 | Vamp7b (Vesicle-Associated Membrane Protein 7b)                                                | 0.0807 | 3.6833 | 4 | 60.5770 | -0.4406 | -0.0918 |
| OSJNBa0087O09.19  | Putative Aldehyde Oxidase                      | At5g20960 | Aao1 (Aldehyde Oxidase 1)                                                                      | 0.3822 | 5.1889 | 4 | 68.9790 | -0.4263 | -0.0066 |
| OSJNBa0094J08.10  | Unknown Protein                                | At3g11030 | Steroid Hormone Receptor/ Transcription Factor                                                 | 0.4330 | 4.1185 | 4 | 96.9700 | -0.4475 | -0.0357 |
| OSJNBa0094J08.7   | Putative Multiple Inositol Polyphosphate       | At1g09870 | Histidine Acid Phosphatase Family Protein                                                      | 0.3409 | 1.9067 | 4 | 46.9600 | -0.1985 | -0.0162 |
| OSJNBb0003H03.27  | Putative ADP-Ribosylation Factor 3             | At5g14670 | ATARFA1B (ADP-Ribosylation Factor A1B); GTP Binding / Phospholipase Activator/ Protein Binding | 0.3535 | 3.6135 | 4 | 55.5560 | -0.2261 | -0.1033 |
| OSJNBb0004A17.1   | Unknown Protein                                | At1g65840 | ATPAO4 (POLYAMINE OXIDASE 4); Amine Oxidase                                                    | 0.2635 | 2.4361 | 4 | 42.7960 | -0.2003 | -0.0317 |
| OSJNBb0005G07.114 | Putative WD Repeat Protein                     | At5g66240 | Transducin Family Protein / WD-40 Repeat Family Protein                                        | 0.2447 | 4.0243 | 4 | 40.0000 | -0.0480 | -0.0472 |
| OSJNBb0005J14.27  | Cytochrome P450-Like Protein                   | At2g45510 | CYP704A2 (Cytochrome P450, Family 704, Subfamily A, Polypeptide 2); Oxygen Binding             | 0.4234 | 4.3495 | 4 | 84.5530 | -0.5040 | -0.0404 |
| OSJNBb0006O08.14  | Putative Zinc Finger Protein                   | At5g46750 | AGD8 (ARF-GAP DOMAIN 8); DNA Binding                                                           | 0.2714 | 1.7079 | 4 | 50.7610 | -0.1121 | -0.0410 |
| OSJNBb0007E22.7   | Putative Serpin                                | At1g47710 | Serpin, Putative / Serine Protease Inhibitor, Putative                                         | 0.3691 | 2.7209 | 4 | 64.9730 | -0.5300 | -0.0212 |
| OSJNBb0009C07.2   | Putative Transcription Initiation Factor       | At4g12610 | ATRAP74/RAP74; Transcription Initiation Factor                                                 | 0.2875 | 4.3306 | 4 | 41.7190 | 0.1399  | -0.0470 |
| OSJNBb0014K18.8   | Putative 1-Deoxy-D-Xylulose-5-Phosphate        | At4g15560 | Cla1 (Chloroplasts Alterados 1)                                                                | 0.1447 | 4.7215 | 4 | 92.7010 | -0.3547 | -0.0307 |
| OSJNBb0015I11.10  | Putative Pollen Allergen                       | At3g45970 | Atexla1 (Arabidopsis Thaliana Expansin-Like A1)                                                | 0.3861 | 3.9196 | 4 | 92.1350 | -0.4659 | -0.0415 |

|                     |                                                 |           |                                                                                                                                                    |            |        |   |         |         |         |
|---------------------|-------------------------------------------------|-----------|----------------------------------------------------------------------------------------------------------------------------------------------------|------------|--------|---|---------|---------|---------|
| OSJNBb0017F17.21    | Putative Zinc Binding Protein                   | At2g40110 | Yippee Family Protein                                                                                                                              | 0.177<br>4 | 2.2548 | 4 | 62.0970 | -0.3583 | -0.1519 |
| OSJNBb0021P10.3     | 20S Proteasome Beta 4 Subunit                   | At4g14800 | PBD2 (20S PROTEASOME BETA SUBUNIT 2);<br>Peptidase                                                                                                 | 0.184<br>0 | 3.7687 | 4 | 67.5000 | -0.5239 | -0.1080 |
| OSJNBb0024K03.4     | Putative Cullin 3                               | At1g26830 | ATCUL3/ATCUL3A/CUL3/CUL3A (Cullin 3A);<br>Protein Binding / Ubiquitin-Protein Ligase                                                               | 0.143<br>3 | 4.6644 | 4 | 50.7400 | -0.3241 | -0.0192 |
| OSJNBb0027B08.34    | Putative Isomerase                              | At4g15940 | Fumarylacetoacetate Hydrolase Family Protein                                                                                                       | 0.282<br>4 | 1.8897 | 4 | 57.5920 | -0.2985 | -0.0980 |
| OSJNBb0028C01.32    | Putative Arm Repeat Containing Protein          | At2g45720 | Binding                                                                                                                                            | 0.306<br>9 | 4.5179 | 4 | 94.8050 | -0.3912 | -0.0235 |
| OSJNBb0034G17.8     | Unknown Protein                                 | At3g57560 | Aspartate/Glutamate/Uridylate Kinase Family Protein                                                                                                | 0.313<br>1 | 4.2349 | 4 | 82.9790 | -0.4923 | -0.0227 |
| OSJNBb0040H10.15    | Translocase Inner Membrane-Like Protein         | At1g20350 | ATTIM17-1 (Arabidopsis Thaliana Translocase Inner Membrane Subunit 17-1); Protein Translocase                                                      | 0.333<br>1 | 3.8248 | 4 | 95.7550 | -0.4388 | -0.0839 |
| OSJNBb0041A22.12    | Putative Inorganic Pyrophosphatase              | At3g53620 | Inorganic Pyrophosphatase, Putative (Soluble) /<br>Pyrophosphate Phospho-Hydrolase, Putative /<br>Ppase, Putative                                  | 0.135<br>2 | 2.6949 | 4 | 49.0000 | -0.3158 | -0.0657 |
| OSJNBb0043H09.9     | Unknown Protein                                 | At5g42150 | Electron Carrier/ Protein Disulfide Oxidoreductase                                                                                                 | 0.301<br>8 | 2.9607 | 4 | 54.8170 | -0.1787 | -0.0618 |
| OSJNBb0048A17.11    | Putative Serine Protease                        | At5g67360 | ARA12; Subtilase                                                                                                                                   | 0.310<br>1 | 4.7603 | 4 | 93.3960 | -0.3481 | -0.0309 |
| OSJNBb0048A17.2     | Translation Initiation Factor 5A                | At1g69410 | Eukaryotic Translation Initiation Factor 5A, Putative /<br>Eif-5A, Putative                                                                        | 0.085<br>8 | 1.5852 | 4 | 63.5760 | -0.5594 | -0.1081 |
| OSJNBb0055I24.131   | Chitinase III-Like Protein                      | At1g70800 | C2 Domain-Containing Protein                                                                                                                       | 0.499<br>5 | 3.9547 | 4 | 68.0720 | -0.4928 | -0.0780 |
| OSJNBb0058B20.19    | Putative Transcription Initiation Factor IIE,   | At4g20330 | Transcription Initiation Factor-Related                                                                                                            | 0.270<br>2 | 3.9883 | 4 | 52.2730 | -0.3408 | -0.0437 |
| OSJNBb0062D12.129-2 | Putative MAP4 Kinase                            | At3g15220 | Protein Kinase, Putative                                                                                                                           | 0.368<br>1 | 4.5863 | 4 | 36.5510 | -0.0208 | -0.0392 |
| OSJNBb0062P14.116-1 | Putative ORMDL2                                 | At1g01230 | ORMDL Family Protein                                                                                                                               | 0.121<br>1 | 3.5619 | 4 | 72.2220 | -0.2259 | -0.1341 |
| OSJNBb0064P21.2     | Calcium-Dependent Protein Kinase                | At2g17290 | CPK6 (CALCIUM-DEPENDENT PROTEIN KINASE 6); Anion Channel/ Calcium- And Calmodulin-Dependent Protein Kinase/ Kinase                                 | 0.277<br>6 | 4.4065 | 4 | 43.2050 | 0.0417  | -0.0169 |
| OSJNBb0064P21.3     | Putative Sugar Transporter                      | At4g35300 | TMT2 (TONOPLAST MONOSACCHARIDE TRANSPORTER2); Carbohydrate Transporter/ Sugar Porter                                                               | 0.220<br>6 | 4.5301 | 4 | 50.6440 | -0.2655 | -0.0319 |
| OSJNBb0074M06.8     | Putative Trypanothione-Dependent Peroxidase     | At1g60420 | DC1 Domain-Containing Protein                                                                                                                      | 0.381<br>8 | 2.3214 | 4 | 61.3590 | -0.4616 | -0.0466 |
| OSJNBb0076N15.1     | Putative Lipxygenase                            | At1g72520 | Lipxygenase, Putative                                                                                                                              | 0.243<br>1 | 4.2542 | 4 | 82.8430 | -0.2974 | -0.0273 |
| OSJNBb0079L11.8     | Putative Isovaleryl-Coa Dehydrogenase           | At3g45300 | Ivd (Isovaleryl-Coa-Dehydrogenase)                                                                                                                 | 0.109<br>6 | 2.9922 | 4 | 57.8130 | -0.4332 | -0.0594 |
| OSJNBb0081B07.12    | Putative Peptide Transport Protein              | At3g53960 | Proton-Dependent Oligopeptide Transport (POT) Family Protein                                                                                       | 0.371<br>6 | 4.5140 | 4 | 93.5710 | -0.4592 | -0.0193 |
| OSJNBb0081K01.19    | Putative ABC (ATP-Binding Cassette) Transporter | At5g39040 | ATTAP2 (Arabidopsis Thaliana Transporter Associated With Antigen Processing Protein 2);<br>Atpase, Coupled To Transmembrane Movement Of Substances | 0.186<br>7 | 1.9282 | 4 | 46.0400 | -0.1324 | -0.0243 |

|                  |                                                 |           |                                                                                                             |            |        |   |         |         |         |
|------------------|-------------------------------------------------|-----------|-------------------------------------------------------------------------------------------------------------|------------|--------|---|---------|---------|---------|
| OSJNBb0084L07.12 | Methylmalonate Semi-Aldehyde Dehydrogenase      | At2g14170 | ALDH6B2 (Aldehyde Dehydrogenase 6B2)                                                                        | 0.196<br>0 | 2.6455 | 4 | 53.8460 | -0.4857 | -0.0345 |
| OSJNBb0089A17.8  | Putative Myb-Related Protein                    | At5g61620 | Myb Family Transcription Factor                                                                             | 0.788<br>9 | 4.0201 | 4 | 52.8240 | -0.1363 | -0.0585 |
| OSJNBb0093E13.1  | Unknown Protein                                 | At3g22290 | Unknown Protein                                                                                             | 0.162<br>6 | 3.9553 | 4 | 41.1590 | -0.3184 | -0.0340 |
| OSJNBb0094K03.17 | Putative ATP-Dependent RNA Helicase             | At2g35920 | Helicase Domain-Containing Protein                                                                          | 0.180<br>0 | 4.7694 | 4 | 35.0180 | 0.1625  | -0.0107 |
| OSJNBb0103I08.15 | Unknown Protein                                 | At5g24380 | YSL2 (YELLOW STRIPE LIKE 2); Oligopeptide Transporter                                                       | 0.268<br>1 | 4.6103 | 4 | 88.4850 | -0.4334 | -0.0330 |
| OSJNBb0108E17.4  | Putative Thioredoxin H-Type (TRX-H) (Trxta)     | At5g42980 | ATTRX3 (Thioredoxin H-Type 3); Thiol-Disulfide Exchange Intermediate                                        | 0.310<br>1 | 1.1905 | 4 | 58.9290 | -0.3696 | -0.1545 |
| OSJNBb0118P14.12 | Unknown Protein                                 | At5g36880 | AMP Binding / Acetate-Coa Ligase/ Catalytic                                                                 | 0.125<br>7 | 2.9558 | 4 | 54.3190 | -0.2583 | -0.0361 |
| P0007D08.11      | Putative Alcohol Dehydrogenase (Zn)             | At5g63620 | Oxidoreductase, Zinc-Binding Dehydrogenase Family Protein                                                   | 0.189<br>1 | 1.6550 | 4 | 53.0150 | -0.4716 | -0.0282 |
| P0018C07.117     | Putative Placental Protein 6                    | At3g07950 | Rhomboid Protein-Related                                                                                    | 0.376<br>3 | 1.6969 | 4 | 41.8060 | -0.0727 | -0.0756 |
| P0025A05.6       | Putative Glucosyltransferase IS5a,              | At2g15480 | UGT73B5 (UDP-Glucosyl Transferase 73B5); UDP-Glycosyltransferase/ Transferase, Transferring Glycosyl Groups | 0.542<br>4 | 4.3316 | 4 | 89.9140 | -0.4394 | -0.0255 |
| P0034A04.112     | 26S Proteasome Regulatory Subunit 4 Homolog     | At4g29040 | RPT2A (Regulatory Particle Triple-A 2A); Atpase                                                             | 0.065<br>3 | 4.3653 | 4 | 59.8040 | -0.5374 | -0.0513 |
| P0042D01.4       | Putative Phenylalanine Ammonia-Lyase            | At2g37040 | PAL1 (PHE AMMONIA LYASE 1); Phenylalanine Ammonia-Lyase                                                     | 0.207<br>4 | 4.6178 | 4 | 92.1690 | -0.4822 | -0.0265 |
| P0044F08.16      | Putative WD40-Repeat Protein                    | At3g18060 | Transducin Family Protein / WD-40 Repeat Family Protein                                                     | 0.247<br>4 | 2.6653 | 4 | 52.5600 | -0.4573 | -0.0364 |
| P0046D03.133     | Putative Prohibitin                             | At4g28510 | Atphb1 (Prohibitin 1)                                                                                       | 0.150<br>0 | 2.5688 | 4 | 57.6210 | -0.5074 | -0.0789 |
| P0047E05.15-1    | Putative Ubiquitin Activating Enzyme            | At1g05350 | Thif Family Protein                                                                                         | 0.218<br>1 | 2.0408 | 4 | 44.1490 | -0.0566 | -0.0657 |
| P0135D07.18      | Membrane Bound O-Acyl Transferase-Like          | At1g63050 | Membrane Bound O-Acyl Transferase (MBOAT) Family Protein                                                    | 0.215<br>5 | 2.5321 | 4 | 53.6040 | -0.0843 | -0.0390 |
| P0264G11.2-2     | Putative Racd Protein                           | At4g35020 | ARAC3/ATROP6/RHO1PS/ROP6 (Rho-Related Protein From Plants 6); GTP Binding / Gtpase                          | 0.051<br>5 | 2.6937 | 4 | 53.1250 | -0.3843 | -0.0853 |
| P0408C03.13      | Putative SLT1 Protein (Ion Homeostasis Related) | At2g37570 | SLT1 (Sodium- And Lithium-Tolerant 1)                                                                       | 0.304<br>2 | 4.3542 | 4 | 65.6440 | -0.3138 | -0.0434 |
| P0410E01.31      | Putative Acetyl Transferase                     | At3g62160 | Transferase Family Protein                                                                                  | 0.610<br>7 | 2.6075 | 4 | 72.9800 | -0.5814 | -0.0656 |
| P0415A04.27      | Disease Resistance Protein-Like                 | At5g43740 | Disease Resistance Protein (CC-NBS-LRR Class), Putative                                                     | 0.814<br>5 | 4.8231 | 4 | 65.7750 | -0.4451 | -0.0087 |
| P0421H07.20      | Putative Farnesyl-Pyrophosphate Synthetase      | At5g47770 | FPS1 (FARNESYL DIPHOSPHATE SYNTHASE 1); Dimethylallyltransferase/ Geranyltransferase                        | 0.221<br>2 | 2.3733 | 4 | 50.7650 | -0.3810 | -0.0592 |
| P0423A12.18      | Putative Glutathione S-Transferase              | At3g62760 | ATGSTF13 (Arabidopsis Thaliana Glutathione S-Transferase (Class Phi) 13); Glutathione Transferase           | 0.473<br>3 | 3.7309 | 4 | 95.7350 | -0.4412 | -0.0543 |
| P0429B05.26      | Putative Phosphoglycerate Dehydrogenase         | At1g17740 | Unknown Protein                                                                                             | 0.250<br>1 | 4.6744 | 4 | 82.0690 | -0.4888 | -0.0225 |
| P0434B04.10      | Putative Triose-Phosphate                       | At3g55440 | ATCTIMC (CYTOSOLIC TRIOSE PHOSPHATE                                                                         | 0.139      | 1.5457 | 4 | 47.8810 | -0.5111 | -0.0534 |

|                |                                             |           |                                                                                                                                   |            |        |   |         |         |         |
|----------------|---------------------------------------------|-----------|-----------------------------------------------------------------------------------------------------------------------------------|------------|--------|---|---------|---------|---------|
|                | Isomerase                                   |           | ISOMERASE); Triose-Phosphate Isomerase                                                                                            | 2          |        |   |         |         |         |
| P0434E03.16-1  | Putative Carrier Protein                    | At2g46320 | Substrate Carrier Family Protein                                                                                                  | 0.372<br>7 | 1.2615 | 4 | 47.6430 | -0.0654 | -0.0614 |
| P0435B05.15    | Putative Ribosomal Protein L18a, Cytosolic  | At2g34480 | 60S Ribosomal Protein L18A (RPL18aB)                                                                                              | 0.074<br>6 | 3.2400 | 4 | 76.7440 | -0.5411 | -0.1343 |
| P0439B06.7     | Putative Acetoacyl-Coa-Thiolase             | At5g47720 | Acetyl-Coa C-Acetyltransferase                                                                                                    | 0.200<br>1 | 1.5941 | 4 | 49.8760 | -0.6124 | -0.0262 |
| P0439B07.4     | Putative PHG1A Protein                      | At2g24170 | Endomembrane Protein 70, Putative                                                                                                 | 0.178<br>6 | 1.7161 | 4 | 52.7000 | -0.4365 | -0.0232 |
| P0443G08.138   | Putative Monodehydroascorbate Reductase     | At1g63940 | Monodehydroascorbate Reductase, Putative                                                                                          | 0.200<br>0 | 2.0147 | 4 | 39.2620 | -0.1155 | -0.0497 |
| P0451H06.1     | Putative Poly(A)-Binding Protein            | At1g49760 | PAB8 (POLY(A) BINDING PROTEIN 8); RNA Binding / Translation Initiation Factor                                                     | 0.265<br>1 | 4.5677 | 4 | 44.0890 | -0.2869 | -0.0418 |
| P0453E05.118   | Translation Initiation Factor 5A            | At1g13950 | EIF-5A (Eukaryotic Translation Initiation Factor 5A-1); Translation Initiation Factor                                             | 0.062<br>8 | 3.4558 | 4 | 56.0000 | -0.5699 | -0.0981 |
| P0455H11.118-1 | Putative Pectinacylesterase Precursor       | At1g57590 | Carboxylic Ester Hydrolase                                                                                                        | 0.348<br>2 | 4.2050 | 4 | 47.9900 | -0.1424 | -0.0392 |
| P0456F08.17    | Putative Lipase                             | At2g42690 | Lipase, Putative                                                                                                                  | 0.461<br>5 | 4.1134 | 4 | 93.6070 | -0.4762 | -0.0443 |
| P0456F08.20    | Putative Processing Peptidase Beta          | At3g02090 | MPPBETA; Metalloendopeptidase                                                                                                     | 0.376<br>7 | 1.9509 | 4 | 57.6520 | -0.4667 | -0.0259 |
| P0463G12.43-1  | Putative Aminopropyl Transferase            | At5g53120 | Spds3 (Spermidine Synthase 3)                                                                                                     | 0.207<br>5 | 3.1626 | 4 | 43.7160 | -0.2421 | -0.0244 |
| P0470B03.25    | Nitrate Reductase Apoenzyme                 | At1g77760 | Nia1 (Nitrate Reductase 1)                                                                                                        | 0.271<br>7 | 4.6950 | 4 | 96.6280 | -0.4492 | -0.0305 |
| P0470G10.17    | Putative Suppressor Of Actin 1              | At5g66020 | ATSAC1B/IBS2 (IMPAIRED IN BABA-INDUCED STERILITY 2); Phosphoinositide 5-Phosphatase                                               | 0.291<br>2 | 4.4732 | 4 | 37.0370 | 0.2295  | -0.0157 |
| P0476C12.12    | Putative 26S Proteasome Regulatory Particle | At5g58290 | RPT3 (Root Phototropism 3); Atpase                                                                                                | 0.075<br>1 | 4.2666 | 4 | 58.3120 | -0.6303 | -0.0539 |
| P0479C12.25-1  | Putative Trehalose-6-Phosphate Synthase     | At1g23870 | ATTPS9 (Arabidopsis Thaliana Trehalose-Phosphatase/Synthase 9); Transferase, Transferring Glycosyl Groups / Trehalose-Phosphatase | 0.427<br>5 | 4.7492 | 4 | 84.0760 | -0.4544 | -0.0216 |
| P0482D04.17    | Unknown Protein                             | At1g27440 | GUT2; Catalytic                                                                                                                   | 0.108<br>2 | 1.5669 | 4 | 58.0400 | -0.2540 | -0.0350 |
| P0485G01.13    | Ubiquitin-Conjugating Enzyme E2             | At1g16890 | UBC36; Ubiquitin-Protein Ligase                                                                                                   | 0.018<br>3 | 1.7089 | 4 | 55.6340 | -0.2397 | -0.0673 |
| P0492E07.128   | Unknown Protein                             | At3g13930 | Dihydrolipoamide S-Acetyltransferase, Putative                                                                                    | 0.271<br>9 | 4.5140 | 4 | 41.9160 | -0.1579 | -0.0250 |
| P0493A04.9     | Plastid (P)Pggpp Synthase                   | At3g14050 | RSH2 (RELA-SPOT HOMOLOG); Catalytic                                                                                               | 0.290<br>2 | 2.3970 | 4 | 63.0950 | -0.5033 | -0.0327 |
| P0498H04.25    | Unknown Protein                             | At1g08480 | Unknown Protein                                                                                                                   | 0.526<br>5 | 3.3610 | 4 | 91.9120 | -0.5085 | -0.1063 |
| P0504A05.24    | Putative 4-Coumarate Coenzyme A Ligase      | At1g51680 | 4cl1 (4-Coumarate:Coa Ligase 1)                                                                                                   | 0.291<br>7 | 4.4406 | 4 | 88.5440 | -0.5131 | -0.0410 |
| P0505D12.6     | Putative Uricase                            | At2g26230 | Uricase / Urate Oxidase / Nodulin 35, Putative                                                                                    | 0.272<br>3 | 4.0765 | 4 | 61.5920 | -0.3101 | -0.0577 |
| P0506B12.12    | Putative Respiratory Burst Oxidase Protein  | At5g60010 | Ferric Reductase-Like Transmembrane Component Family Protein                                                                      | 0.353<br>7 | 4.7021 | 4 | 79.1980 | -0.4443 | -0.0218 |
| P0506F02.114   | Putative GTP-Binding Protein DRG            | At4g39520 | GTP-Binding Protein, Putative                                                                                                     | 0.071      | 1.9537 | 4 | 42.8990 | -0.1423 | -0.0241 |

|                |                                                  |           |                                                                                                                |            |        |   |         |         |         |
|----------------|--------------------------------------------------|-----------|----------------------------------------------------------------------------------------------------------------|------------|--------|---|---------|---------|---------|
|                |                                                  |           |                                                                                                                | 7          |        |   |         |         |         |
| P0519E12.134   | Unknown Protein                                  | At4g08810 | SUB1 (Short Under Blue Light 1)                                                                                | 0.312<br>7 | 4.4229 | 4 | 75.3570 | -0.5008 | -0.0243 |
| P0520B06.4     | Oryza Sativa MAP Kinase Kinase 1                 | At5g56580 | ATMKK6 (ARABIDOPSIS NQK1); Kinase                                                                              | 0.232<br>7 | 2.6304 | 4 | 45.6460 | -0.1235 | -0.0421 |
| P0523B07.38-1  | Putative Polyphosphoinositide Binding Protein    | At5g47730 | SEC14 Cytosolic Factor, Putative / Polyphosphoinositide-Binding Protein, Putative                              | 0.289<br>6 | 2.6477 | 4 | 49.3670 | -0.0065 | -0.0648 |
| P0528B09.18    | Glyceraldehyde-3-Phosphate Dehydrogenase         | At2g24270 | ALDH11A3 (Aldehyde Dehydrogenase 11A3); 3-Chloroallyl Aldehyde Dehydrogenase                                   | 0.085<br>2 | 3.7254 | 4 | 61.3250 | -0.2104 | -0.0236 |
| P0530H10.9     | Putative Ferrochelatase II                       | At2g30390 | Ferrochelatase II                                                                                              | 0.215<br>7 | 4.4360 | 4 | 44.6060 | -0.1211 | -0.0236 |
| P0544G09.31    | Putative ER Lumen Protein-Retaining Receptor     | At1g75760 | ER Lumen Protein Retaining Receptor Family Protein                                                             | 0.121<br>7 | 1.6923 | 4 | 61.4230 | -0.3848 | -0.0706 |
| P0576F08.10    | Putative SINA2 Protein,Seven In Absentia         | At3g58040 | Seven In Absentia (SINA) Family Protein                                                                        | 0.228<br>5 | 2.3717 | 4 | 60.7640 | -0.3201 | -0.0412 |
| P0585B01.29-1  | Putative HGA1                                    | At3g57380 | Unknown Protein                                                                                                | 0.741<br>7 | 4.2612 | 4 | 89.4970 | -0.5192 | -0.0398 |
| P0594D10.134   | Putative Protein Kinase Hypkaba1(Abcisic         | At4g33950 | OST1 (OPEN STOMATA 1); Kinase/ Protein Kinase                                                                  | 0.203<br>1 | 4.1253 | 4 | 58.4660 | -0.4838 | -0.0469 |
| P0599F09.13    | Putative Serine/Threonine-Protein Kinase 16      | At5g08160 | ATPK3 (Arabidopsis Thaliana Serine/Threonine Protein Kinase 3); Kinase                                         | 0.174<br>2 | 2.8747 | 4 | 53.7740 | -0.3408 | -0.0668 |
| P0610E02.33    | Putative Glycinamide Ribonucleotide Synthetase   | At1g09830 | Phosphoribosylamine--Glycine Ligase (PUR2)                                                                     | 0.267<br>1 | 1.9084 | 4 | 41.7340 | -0.0490 | -0.0400 |
| P0617C02.124-2 | Putative Glucose Transport Protein STP1          | At1g11260 | STP1 (SUGAR TRANSPORTER 1); Carbohydrate Transporter/ Sugar Porter                                             | 0.239<br>3 | 4.0622 | 4 | 95.5800 | -0.4091 | -0.0476 |
| P0627E03.33    | Putative UDP-Glucose Glucosyltransferase1        | At1g22360 | UDP-Glycosyltransferase                                                                                        | 0.349<br>1 | 4.2661 | 4 | 92.0000 | -0.4396 | -0.0390 |
| P0627E03.4     | Putative Annexin P35                             | At5g10230 | ANN7 (ANN7, ANNEXIN ARABIDOPSIS 7); Calcium Ion Binding / Calcium-Dependent Phospholipid Binding               | 0.320<br>3 | 4.0829 | 4 | 68.0560 | -0.1979 | -0.0573 |
| P0627E10.1     | Putative Phosphoinositide-Specific Phospholipase | At3g08510 | ATPLC2 (PHOSPHOLIPASE C 2); Phospholipase C                                                                    | 0.337<br>1 | 4.4571 | 4 | 69.7180 | -0.2317 | -0.0283 |
| P0643F09.35    | Putative Potassium Channel Beta Subunit          | At1g04690 | KAB1 (POTASSIUM CHANNEL BETA SUBUNIT); Potassium Channel                                                       | 0.114<br>2 | 4.0505 | 4 | 78.3170 | -0.5278 | -0.0534 |
| P0657H12.28    | GL2-Type Homeobox Genes                          | At3g61150 | HDG1 (HOMEODOMAIN GLABROUS1); DNA Binding / Transcription Factor                                               | 0.356<br>5 | 4.7860 | 4 | 73.1030 | -0.5154 | -0.0228 |
| P0665C04.32    | Putative Glycyl-Trna Synthetase                  | At1g29880 | Glycyl-Trna Synthetase / Glycine--Trna Ligase                                                                  | 0.171<br>8 | 3.9667 | 4 | 54.4460 | -0.3926 | -0.0348 |
| P0668H12.19    | Putative 26S Proteasome Regulatory Subunit       | At2g39990 | EIF2 (Eukaryotic Translation Initiation Factor 2); Translation Initiation Factor                               | 0.209<br>0 | 1.9283 | 4 | 62.4540 | -0.4157 | -0.0423 |
| P0673E01.19    | Putative SNF2 Domain/Helicase Domain-Containing  | At2g16390 | DRD1 (DEFECTIVE IN RNA-DIRECTED DNA METHYLATION 1); ATP Binding / DNA Binding / Helicase/ Nucleic Acid Binding | 0.529<br>7 | 4.7376 | 4 | 37.3150 | 0.2257  | -0.0095 |
| P0676G05.13    | Unknown Protein                                  | At3g17020 | Universal Stress Protein (USP) Family Protein                                                                  | 0.369<br>4 | 1.9935 | 4 | 72.6110 | -0.3973 | -0.0539 |
| P0676H02.3     | Putative Purine Permease                         | At1g28220 | ATPUP3 (Arabidopsis Thaliana Purine Permease 3); Purine Transporter                                            | 0.425<br>5 | 4.1506 | 4 | 94.2360 | -0.4214 | -0.0573 |
| P0676H03.26    | Unknown Protein                                  | At1g52890 | ANAC019 (Arabidopsis NAC Domain Containing Protein 19); Transcription Factor                                   | 0.586<br>5 | 3.9263 | 4 | 93.0690 | -0.3425 | -0.0522 |
| P0679C08.10    | Unknown Protein                                  | At5g42090 | Unknown Protein                                                                                                | 0.239      | 4.2263 | 4 | 86.1110 | -0.4920 | -0.0445 |

|                 |                                           |           |                                                                                               |        |        |   |         |         |         |
|-----------------|-------------------------------------------|-----------|-----------------------------------------------------------------------------------------------|--------|--------|---|---------|---------|---------|
|                 |                                           |           |                                                                                               | 6      |        |   |         |         |         |
| P0679C08.19     | Rice Waxy Protein                         | At1g32900 | Starch Synthase, Putative                                                                     | 0.3179 | 4.5634 | 4 | 82.6090 | -0.5464 | -0.0264 |
| P0688A04.10     | Putative Cytochrome P450                  | At3g14690 | CYP72A15 (Cytochrome P450, Family 72, Subfamily A, Polypeptide 15); Oxygen Binding            | 0.3782 | 3.1487 | 4 | 53.8460 | 0.0232  | -0.0528 |
| P0691E06.15     | Putative Latex-Abundant Protein           | At1g79340 | Latex-Abundant Protein, Putative (AMC7) / Caspase Family Protein                              | 0.3491 | 4.1946 | 4 | 59.2880 | -0.5299 | -0.0453 |
| P0691E06.20     | Unknown Protein                           | At5g44860 | Unknown Protein                                                                               | 0.4227 | 2.2377 | 4 | 86.0680 | -0.4907 | -0.0672 |
| P0695H10.14     | Putative Signal Recognition Particle 54K  | At1g48900 | Signal Recognition Particle 54 Kda Protein 3 / SRP54 (SRP-54C)                                | 0.0945 | 4.2681 | 4 | 53.7310 | -0.3921 | -0.0532 |
| P0695H10.9      | Putative Transcription Initiation Factor  | At1g75510 | Transcription Initiation Factor IIF Beta Subunit (TFIIF-Beta) Family Protein                  | 0.3376 | 3.9109 | 4 | 59.6710 | -0.2542 | -0.0590 |
| P0700F06.17     | Unknown Protein                           | At3g01780 | Encodes TPLATE, A Cytokinesis Protein Targeted To The Cell Plate                              | 0.2345 | 1.9064 | 4 | 54.7640 | -0.3094 | -0.0116 |
| P0702H08.19     | Putative Carboxymethylenebutenolidase     | At2g32520 | Dienelactone Hydrolase Family Protein                                                         | 0.1720 | 2.1634 | 4 | 52.4340 | -0.3031 | -0.0214 |
| P0705A05.111    | Putative Iron Inhibited ABC Transporter 2 | At5g60790 | ATGCN1 (Arabidopsis Thaliana General Control Non-Repressible 1)                               | 0.1083 | 4.4464 | 4 | 54.0000 | -0.6337 | -0.0360 |
| P0712E02.8      | Unknown Protein                           | At5g35460 | Unknown Protein                                                                               | 0.2087 | 2.5368 | 4 | 61.8230 | -0.3463 | -0.0577 |
| 24K23.23        | Putative Amylogenin                       | At3g08900 | RGP3 (REVERSIBLY GLYCOSYLATED POLYPEPTIDE 3); Alpha-1,4-Glucan-Protein Synthase (UDP-Forming) | 0.5406 | 2.7634 | 5 | 52.0680 | -0.0975 | -0.0254 |
| B1026C12.3      | Putative Ethylene-Inducible Protein       | At5g01410 | PDX1 (PYRIDOXINE BIOSYNTHESIS 1.3); Protein Heterodimerization/ Protein Homodimerization      | 0.0996 | 3.9587 | 5 | 94.6840 | -0.5080 | -0.0726 |
| B1047A05.37     | Putative 60S Ribosomal Protein L7         | At3g13580 | 60S Ribosomal Protein L7 (RPL7D)                                                              | 0.1541 | 3.7506 | 5 | 78.5710 | -0.5678 | -0.0698 |
| B1080D07.15     | Putative 33kda Oxygen Evolvingprotein Of  | At3g50820 | PSBO-2/PSBO2 (PHOTOSYSTEM II SUBUNIT O-2); Oxygen Evolving                                    | 0.1526 | 4.0490 | 5 | 88.7460 | -0.4282 | -0.0634 |
| B1099H05.23     | Putative Germin A                         | At5g39110 | Germin-Like Protein, Putative                                                                 | 0.3232 | 3.1487 | 5 | 53.4250 | -0.3020 | -0.0398 |
| B1112D09.3      | Putative Root Hair Defective 3 (RHD3)     | At3g13870 | Rhd3 (Root Hair Defective 3)                                                                  | 0.2158 | 2.8438 | 5 | 39.8640 | -0.0162 | -0.0177 |
| B1131G07.11     | Putative Elongation Factor 1-Gamma        | At1g57720 | Translation Elongation Factor                                                                 | 0.1529 | 2.8276 | 5 | 53.4390 | -0.4105 | -0.0353 |
| B1156H12.13     | Putative DEAD BOX RNA Helicase            | At5g11200 | DEAD/DEAH Box Helicase, Putative                                                              | 0.1378 | 2.3943 | 5 | 46.1150 | -0.3229 | -0.0415 |
| B1215B07.34     | Putative Adenosine Kinase                 | At5g03300 | ADK2 (ADENOSINE KINASE 2); Kinase                                                             | 0.1064 | 2.8493 | 5 | 49.6840 | -0.4137 | -0.0557 |
| OJ1006F06.19    | Unknown Protein                           | At1g21880 | Peptidoglycan-Binding Lysm Domain-Containing Protein                                          | 0.9183 | 4.1376 | 5 | 78.6320 | -0.3529 | -0.0517 |
| OJ1020_C02.26   | Putative P18                              | At2g45640 | SAP18 (SIN3 ASSOCIATED POLYPEPTIDE P18); Protein Binding / Transcription Regulator            | 0.2563 | 3.4497 | 5 | 49.2960 | -0.0026 | -0.1191 |
| OJ1047_A06.117  | Plasma Membrane Intrinsic Protein         | At3g54820 | PIP2;5/PIP2D (Plasma Membrane Intrinsic Protein 2;5); Water Channel                           | 0.1399 | 3.8667 | 5 | 97.5350 | -0.4102 | -0.0521 |
| OJ1065_B06.19-1 | Putative Photosystem I Antenna Protein    | At3g61470 | LHCA2 (Photosystem I Light Harvesting Complex Gene 2); Chlorophyll Binding                    | 0.1618 | 3.8001 | 5 | 94.0710 | -0.4805 | -0.0802 |
| OJ1112_G07.32   | Unknown Protein                           | At5g06270 | Unknown Protein                                                                               | 0.5016 | 3.2746 | 5 | 98.3190 | -0.3180 | -0.0959 |

|                |                                                 |           |                                                                                                  |            |        |   |         |         |         |
|----------------|-------------------------------------------------|-----------|--------------------------------------------------------------------------------------------------|------------|--------|---|---------|---------|---------|
| OJ1124_B05.4   | Putative Osrad23                                | At5g38470 | DNA Repair Protein RAD23, Putative                                                               | 0.274<br>1 | 1.4099 | 5 | 42.0630 | -0.0210 | -0.0429 |
| OJ1124_H03.2   | Cysteine Synthase                               | At4g14880 | Oasa1 (O-Acetylserine (Thiol) Lyase (Oas-TI) Isoform A1)                                         | 0.150<br>9 | 1.8785 | 5 | 51.3330 | -0.4202 | -0.0434 |
| OJ1131_E09.11  | Putative Protein Kinase                         | At3g01090 | AKIN10 (Arabidopsis SNF1 Kinase Homolog 10, SNF1-RELATED PROTEIN KINASE 1.1); Protein Kinase     | 0.142<br>7 | 3.1375 | 5 | 39.6590 | -0.3291 | -0.0327 |
| OJ1145_F01.6   | Putative Cinnamyl-Alcohol Dehydrogenase         | At4g34230 | Cad5 (Cinnamyl Alcohol Dehydrogenase 5)                                                          | 0.196<br>2 | 4.1153 | 5 | 93.0840 | -0.5033 | -0.0523 |
| OJ1150_A11.25  | Monodehydroascorbate Reductase                  | At3g52880 | ATMDAR1 (MONODEHYDROASCORBATE REDUCTASE 1); Monodehydroascorbate Reductase (NADH)                | 0.205<br>4 | 1.5067 | 5 | 66.0100 | -0.5749 | -0.0437 |
| OJ1163_G08.25  | Putative Histidine Amino Acid Transporter       | At5g40780 | LHT1 (LYSINE HISTIDINE TRANSPORTER 1); Amino Acid Transporter                                    | 0.174<br>9 | 4.3114 | 5 | 89.0160 | -0.3391 | -0.0407 |
| OJ1191_A10.119 | Putative 70 Kda Peptidylprolyl Isomerase        | At3g25230 | ROF1 (ROTAMASE FKBP 1); FK506 Binding / Calmodulin Binding / Peptidyl-Prolyl Cis-Trans Isomerase | 0.148<br>5 | 2.7183 | 5 | 47.6920 | -0.3811 | -0.0188 |
| OJ1212_C05.3   | Unknown Protein                                 | At2g44310 | Calcium-Binding EF Hand Family Protein                                                           | 0.400<br>2 | 3.3867 | 5 | 98.6490 | -0.4632 | -0.1120 |
| OJ1225_F07.14  | Unknown Protein                                 | At5g12960 | Catalytic                                                                                        | 0.393<br>0 | 3.7272 | 5 | 60.7230 | -0.3751 | -0.0304 |
| OJ1225_F07.15  | Putative Zinc-Finger Protein                    | At1g51200 | DNA Binding / Zinc Ion Binding                                                                   | 0.386<br>9 | 3.3106 | 5 | 75.7760 | -0.7136 | -0.0867 |
| OJ1234_B11.27  | Putative Protein Kinase (ADK1)                  | At1g03930 | ADK1 (DUAL SPECIFICITY KINASE 1); Kinase                                                         | 0.233<br>2 | 4.3004 | 5 | 40.4550 | 0.2856  | -0.0173 |
| OJ1268_B08.8   | GTP-Binding Nuclear Protein RAN-B1              | At5g55190 | RAN3; GTP Binding                                                                                | 0.048<br>0 | 1.6293 | 5 | 52.6320 | -0.5475 | -0.0756 |
| OJ1342_D02.8   | Putative Oscctp                                 | At5g26220 | Chac-Like Family Protein                                                                         | 0.298<br>6 | 2.2889 | 5 | 57.7890 | -0.2370 | -0.0671 |
| OJ1343_D04.115 | Putative Sex Determination Protein Tasselseed 2 | At4g03140 | Oxidoreductase                                                                                   | 0.498<br>7 | 3.9615 | 5 | 89.2720 | -0.4387 | -0.0667 |
| OJ1351_C05.112 | Probable Photosystem II Oxygen-Evolving Complex | At1g06680 | PSBP-1 (OXYGEN-EVOLVING ENHANCER PROTEIN 2); Calcium Ion Binding                                 | 0.182<br>6 | 3.8147 | 5 | 94.1910 | -0.4061 | -0.0555 |
| OJ1359_D06.12  | Putative Ribosomal Protein S4                   | At5g58420 | 40S Ribosomal Protein S4 (RPS4D)                                                                 | 0.073<br>1 | 1.7769 | 5 | 67.1880 | -0.6681 | -0.0521 |
| OJ1362_G11.23  | Putative LEA Protein                            | At5g44310 | Late Embryogenesis Abundant Domain-Containing Protein / LEA Domain-Containing Protein            | 0.828<br>7 | 3.2982 | 5 | 93.9890 | -0.5427 | -0.0610 |
| OJ1364E02.4    | Putative LIM-Domain Protein                     | At2g39900 | LIM Domain-Containing Protein                                                                    | 0.200<br>7 | 1.9040 | 5 | 66.1290 | -0.2475 | -0.0990 |
| OJ1371_D04.6   | Putative Cysteine Proteinase 1 Precursor        | At4g39090 | RD19 (RESPONSIVE TO DEHYDRATION 19); Cysteine-Type Peptidase                                     | 0.240<br>6 | 4.0585 | 5 | 75.7060 | -0.5290 | -0.0402 |
| OJ1372_D06.35  | Putative CER1 Protein                           | At1g02190 | CER1 Protein, Putative                                                                           | 0.391<br>2 | 2.8731 | 5 | 60.9800 | -0.1280 | -0.0291 |
| OJ1457_D07.117 | Putative Malate Dehydrogenase                   | At2g13560 | Malate Oxidoreductase, Putative                                                                  | 0.153<br>7 | 2.3151 | 5 | 47.7590 | -0.0502 | -0.0465 |
| OJ1479_B11.3   | Proteasome Alpha Subunit                        | At5g66140 | PAD2 (20S Proteasome Alpha Subunit D2); Peptidase                                                | 0.066<br>7 | 3.7241 | 5 | 91.1890 | -0.5566 | -0.0739 |
| OJ1479_B11.9   | Putative Peroxisome Type Ascorbate Peroxidase   | At4g35000 | APX3 (ASCORBATE PEROXIDASE 3); L-Ascorbate Peroxidase                                            | 0.193<br>2 | 1.8655 | 5 | 47.9850 | -0.3931 | -0.0818 |
| OJ1479_B12.23  | Putative Diphosphate-Fructose-6-                | At1g76550 | Pyrophosphate--Fructose-6-Phosphate 1-                                                           | 0.157      | 2.4030 | 5 | 46.8270 | -0.3615 | -0.0287 |



|                  |                                                  |           |                                                                                                                     |        |        |   |         |         |         |
|------------------|--------------------------------------------------|-----------|---------------------------------------------------------------------------------------------------------------------|--------|--------|---|---------|---------|---------|
|                  | Phosphate                                        |           | Phosphotransferase Alpha Subunit, Putative / Pyrophosphate-Dependent 6-Phosphofructose-1-Kinase, Putative           | 0      |        |   |         |         |         |
| OJ1479_B12.9     | Putative NADPH-Thioredoxin Reductase             | At4g35460 | NTR1 (NADPH-Dependent Thioredoxin Reductase 1)                                                                      | 0.1745 | 4.1540 | 5 | 85.0790 | -0.5485 | -0.0761 |
| OJ1484_G09.129-1 | Phosphoenolpyruvate Carboxylase                  | At1g53310 | ATPPC1 (PHOSPHOENOLPYRUVATE CARBOXYLASE 1); Phosphoenolpyruvate Carboxylase                                         | 0.0864 | 2.2941 | 5 | 58.0140 | -0.3406 | -0.0188 |
| OJ1540_H01.1     | Heat Shock Protein 90                            | At4g24190 | SHD (SHEPHERD); ATP Binding                                                                                         | 0.1452 | 2.5735 | 5 | 62.8330 | -0.5409 | -0.0133 |
| OJ1540_H01.4     | Putative Protein Phosphatase                     | At3g51370 | Protein Phosphatase 2C, Putative / PP2C, Putative                                                                   | 0.1776 | 4.2360 | 5 | 45.8450 | -0.1749 | -0.0355 |
| OJ1559_F09.120   | Cellulose Synthase-4                             | At5g05170 | CESA3 (CELLULOSE SYNTHASE 3); Cellulose Synthase/ Transferase, Transferring Glycosyl Groups                         | 0.1334 | 2.0245 | 5 | 52.4320 | -0.4130 | -0.0191 |
| OJ1582_D10.12    | Histone H2A                                      | At4g27230 | Histone H2A, Putative                                                                                               | 0.0843 | 3.3866 | 5 | 94.6150 | -0.4840 | -0.1133 |
| OJ1611_C08.4     | Putative Beta-1,3-Glucanase Precursor            | At5g55180 | Glycosyl Hydrolase Family 17 Protein                                                                                | 0.3268 | 4.2927 | 5 | 94.3040 | -0.4131 | -0.0365 |
| OJ1613_G04.21    | Putative Actin-Related Protein 4 (ARP4)          | At1g18450 | ATARP4 (ACTIN-RELATED PROTEIN 4); Structural Constituent Of Cytoskeleton                                            | 0.2060 | 1.7285 | 5 | 40.2440 | 0.0654  | -0.0400 |
| OJ1626_B09.4     | Alpha 2 Subunit Of 20S Proteasome                | At1g16470 | PAB1 (20S Proteasome Alpha Subunit B1); Peptidase                                                                   | 0.0641 | 2.3265 | 5 | 48.4020 | -0.1034 | -0.0834 |
| OJ1715_H01.42    | Putative Ribosomal Protein L35A                  | At1g74270 | 60S Ribosomal Protein L35a (RPL35aC)                                                                                | 0.1155 | 2.9452 | 5 | 94.4950 | -0.4771 | -0.1777 |
| OJ1789_C07.13    | Moco Containing Protein(Osmcp)                   | At3g01910 | Sox (Sulfite Oxidase)                                                                                               | 0.1748 | 3.9918 | 5 | 42.4400 | 0.0569  | -0.0506 |
| OJ9003_G05.34    | Putative Ribosomal Protein S14                   | At3g52580 | 40S Ribosomal Protein S14 (RPS14C)                                                                                  | 0.0435 | 0.7864 | 5 | 46.4790 | -0.3265 | -0.0947 |
| OJA1212_C06.25   | Lactate Dehydrogenase                            | At4g17260 | L-Lactate Dehydrogenase, Putative                                                                                   | 0.2686 | 4.1675 | 5 | 96.3960 | -0.4148 | -0.0575 |
| OJA1364E02.2     | Putative Fructose-1,6-Biphosphatase, Chloroplast | At3g54050 | Fructose-1,6-Bisphosphatase, Putative / D-Fructose-1,6-Bisphosphate 1-Phosphohydrolase, Putative / Fbpase, Putative | 0.1624 | 4.1499 | 5 | 93.7340 | -0.4550 | -0.0404 |
| OSJNBa0015J03.9  | Putative Enolase (2-Phospho-D-Glycerate)         | At2g36530 | LOS2 (Low Expression Of Osmotically Responsive Genes 1); Phosphopyruvate Hydratase                                  | 0.1024 | 1.3938 | 5 | 53.6340 | -0.4883 | -0.0477 |
| OSJNBa0006L06.7  | 60S Ribosomal Protein L17                        | At3g04400 | EMB2171 (EMBRYO DEFECTIVE 2171); Structural Constituent Of Ribosome                                                 | 0.0247 | 2.2510 | 5 | 82.6090 | -0.6621 | -0.0986 |
| OSJNBa0007M04.13 | Putative RNA Binding Protein                     | At5g04600 | RNA Recognition Motif (RRM)-Containing Protein                                                                      | 0.3616 | 2.4572 | 5 | 58.8540 | -0.4864 | -0.0776 |
| OSJNBa0013D02.10 | Putative Ascorbate Peroxidase                    | At1g07890 | Apx1 (Ascorbate Peroxidase 1, Maternal Effect Embryo Arrest 6)                                                      | 0.1698 | 1.4244 | 5 | 70.9960 | -0.6275 | -0.0552 |
| OSJNBa0013K16.2  | Unknown Protein                                  | At4g35310 | CPK5 (CALMODULIN-DOMAIN PROTEIN KINASE 5); Calcium- And Calmodulin-Dependent Protein Kinase/ Kinase                 | 0.1829 | 4.4998 | 5 | 60.3080 | -0.3997 | -0.0238 |
| OSJNBa0017N12.5  | Histone H3.2 Protein                             | At5g10980 | Histone H3                                                                                                          | 0.0290 | 2.2588 | 5 | 60.0000 | -0.6268 | -0.0912 |
| OSJNBa0018M05.20 | Unknown Protein                                  | At1g34130 | STT3B (STAUROSPORIN AND TEMPERATURE SENSITIVE 3-LIKE B); Oligosaccharyl Transferase                                 | 0.1151 | 2.0262 | 5 | 61.0870 | -0.3401 | -0.0395 |
| OSJNBa0020P07.11 | Unknown Protein                                  | At1g01090 | PDH-E1 ALPHA (PYRUVATE DEHYDROGENASE                                                                                | 0.193  | 4.2599 | 5 | 61.6160 | -0.6602 | -0.0416 |

|                    |                                                 |           |                                                                                                                  |        |        |   |         |         |         |
|--------------------|-------------------------------------------------|-----------|------------------------------------------------------------------------------------------------------------------|--------|--------|---|---------|---------|---------|
|                    |                                                 |           | E1 ALPHA); Pyruvate Dehydrogenase (Acetyl-Transferring)                                                          | 2      |        |   |         |         |         |
| OSJNBa0024F18.3    | Putative NAC-Domain Protein                     | At4g35580 | No Apical Meristem (NAM) Family Protein                                                                          | 0.7197 | 3.9569 | 5 | 91.6110 | -0.3877 | -0.0354 |
| OSJNBa0025J22.3    | Putative Protein Kinase (KIPK)                  | At4g26610 | Protein Kinase, Putative                                                                                         | 0.7458 | 4.2308 | 5 | 95.7180 | -0.3564 | -0.0660 |
| OSJNBa0027P10.3    | Putative Peptide Methionine Sulfoxide Reductase | At4g25130 | Peptide Methionine Sulfoxide Reductase, Putative                                                                 | 0.2002 | 3.6866 | 5 | 82.8130 | -0.5371 | -0.1288 |
| OSJNBa0029H02.14   | Unknown Protein                                 | At5g48930 | Transferase Family Protein                                                                                       | 0.3006 | 4.3478 | 5 | 64.4550 | -0.1996 | -0.0430 |
| OSJNBa0029P06.15   | Putative Alpha-Mannosidase                      | At5g66150 | Glycosyl Hydrolase Family 38 Protein                                                                             | 0.2815 | 2.7230 | 5 | 44.2830 | 0.1367  | -0.0292 |
| OSJNBa0032G08.18   | Putative 40S Ribosomal Protein                  | At3g04770 | RPSAB (40S Ribosomal Protein SA B); Structural Constituent Of Ribosome                                           | 0.1781 | 1.7562 | 5 | 64.6050 | -0.5411 | -0.0633 |
| OSJNBa0032G11.5    | Putative Late Embryogenesis Abundant Protein    | At2g44060 | Late Embryogenesis Abundant Family Protein / LEA Family Protein                                                  | 0.2204 | 3.9874 | 5 | 88.0950 | -0.5436 | -0.0785 |
| OSJNBa0032H19.8    | Putative Ribosomal Protein S19                  | At5g61170 | 40S Ribosomal Protein S19 (RPS19C)                                                                               | 0.1770 | 1.7622 | 5 | 72.7270 | -0.4670 | -0.1096 |
| OSJNBa0033P04.2    | Putative Rubisco Subunit Binding-Protein Alpha  | At2g28000 | CPN60A (Chloroplast / 60 Kda Chaperonin Alpha Subunit); ATP Binding / Protein Binding / Unfolded Protein Binding | 0.1615 | 2.1306 | 5 | 45.4210 | -0.3317 | -0.0163 |
| OSJNBa0034D21.15   | Putative Antifungal Zeamatin-Like Protein       | At4g11650 | Atosm34 (Osmotin 34)                                                                                             | 0.3041 | 3.7167 | 5 | 96.0350 | -0.4211 | -0.0472 |
| OSJNBa0035I03.10   | Putative Inorganic Pyrophosphatase              | At1g15690 | AVP1 (Vacuolar-Type H <sup>+</sup> -Pumping Pyrophosphatase 1)                                                   | 0.1124 | 1.6663 | 5 | 54.7430 | -0.5982 | -0.0218 |
| OSJNBa0036B21.6    | Unknown Protein                                 | At1g15820 | LHCB6 (LIGHT HARVESTING COMPLEX PSII); Chlorophyll Binding                                                       | 0.1418 | 3.7990 | 5 | 97.5100 | -0.4327 | -0.0583 |
| OSJNBa0040E01.8    | Putative UDP-Glucose Dehydrogenase              | At5g15490 | UDP-Glucose 6-Dehydrogenase, Putative                                                                            | 0.0811 | 4.2243 | 5 | 96.9090 | -0.4269 | -0.0352 |
| OSJNBa0042F15.2    | Unknown Protein                                 | At5g11560 | Catalytic                                                                                                        | 0.3072 | 1.9131 | 5 | 34.7640 | -0.0094 | -0.0165 |
| OSJNBa0042F21.13   | Unknown Protein                                 | At3g55800 | SBPASE (Sedoheptulose-Bisphosphatase); Phosphoric Ester Hydrolase                                                | 0.1629 | 4.2551 | 5 | 73.7130 | -0.5411 | -0.0556 |
| OSJNBa0043A12.14   | Unknown Protein                                 | At1g13640 | Phosphatidylinositol 3- And 4-Kinase Family Protein                                                              | 0.3416 | 3.3173 | 5 | 67.3800 | -0.3496 | -0.0279 |
| OSJNBa0043A12.28   | Unknown Protein                                 | At5g43060 | Cysteine Proteinase, Putative / Thiol Protease, Putative                                                         | 0.3371 | 4.4060 | 5 | 70.1830 | -0.4159 | -0.0536 |
| OSJNBa0043A12.6    | Unknown Protein                                 | At5g53300 | UBC10 (Ubiquitin-Conjugating Enzyme 10); Ubiquitin-Protein Ligase                                                | 0.0369 | 3.3140 | 5 | 63.1940 | -0.3698 | -0.0932 |
| OSJNBa0044E16.36   | Type 1 Membrane Protein -Like                   | At3g24160 | Pmp (Putative Type 1 Membrane Protein)                                                                           | 0.5882 | 2.1835 | 5 | 40.8570 | -0.1942 | -0.0243 |
| OSJNBa0053L11.26-1 | Glutathione Reductase                           | At3g24170 | ATGR1; Glutathione-Disulfide Reductase                                                                           | 0.1931 | 2.1299 | 5 | 44.1810 | -0.2226 | -0.0264 |
| OSJNBa0055P24.3    | Cytoplasmic Malate Dehydrogenase                | At5g43330 | Malate Dehydrogenase, Cytosolic, Putative                                                                        | 0.0848 | 1.3959 | 5 | 52.7160 | -0.5896 | -0.0431 |
| OSJNBa0058G03.7    | Unknown Protein                                 | At1g29150 | ATS9 (19S PROTEOSOME SUBUNIT 9); Binding                                                                         | 0.1062 | 1.8837 | 5 | 47.1790 | -0.3741 | -0.0242 |
| OSJNBa0059E14.17   | Putative Ubiquinol-Cytochrome C Reductase       | At5g25450 | Ubiquinol-Cytochrome C Reductase Complex 14 Kda Protein, Putative                                                | 0.2344 | 3.3593 | 5 | 83.1930 | -0.3921 | -0.1056 |
| OSJNBa0060K08.43   | Putative BTB/POZ Domain-                        | At3g61600 | ATPOB1 (Arabidopsis Thaliana POZ/BTB                                                                             | 0.325  | 4.4639 | 5 | 56.0930 | -0.1853 | -0.0344 |

|                  |                                                |           |                                                                                         |            |        |   |         |         |         |  |
|------------------|------------------------------------------------|-----------|-----------------------------------------------------------------------------------------|------------|--------|---|---------|---------|---------|--|
|                  | Containing Protein                             |           | Containing-Protein 1); Protein Binding                                                  | 6          |        |   |         |         |         |  |
| OSJNBa0061E21.29 | Putative TGF-Beta Receptor-Interacting Protein | At2g46280 | TRIP-1 (TGF-BETA RECEPTOR INTERACTING PROTEIN 1); Nucleotide Binding                    | 0.149<br>5 | 4.0871 | 5 | 64.3090 | -0.6411 | -0.0512 |  |
| OSJNBa0061K21.15 | Putative Epimerase/Dehydratase                 | At5g28840 | GME (GDP-D-MANNOSE 3',5'-EPIMERASE); GDP-Mannose 3,5-Epimerase/ NAD Binding / Catalytic | 0.060<br>1 | 4.0670 | 5 | 66.8600 | -0.6483 | -0.0270 |  |
| OSJNBa0067K08.13 | Unknown Protein                                | At5g16970 | AT-AER (ALKENAL REDUCTASE); 2-Alkenal Reductase                                         | 0.264<br>7 | 4.1193 | 5 | 94.7370 | -0.4593 | -0.0496 |  |
| OSJNBa0067K08.23 | Unknown Protein                                | At3g02470 | Samdc (S-Adenosylmethionine Decarboxylase)                                              | 0.424<br>2 | 1.9535 | 5 | 52.9890 | -0.6404 | -0.0384 |  |
| OSJNBa0067N01.16 | Tonoplast Intrinsic Protein                    | At2g36830 | GAMMA-TIP (Tonoplast Intrinsic Protein (TIP) Gamma); Water Channel                      | 0.136<br>1 | 3.7966 | 5 | 96.7210 | -0.4533 | -0.0772 |  |
| OSJNBa0068L06.2  | Unknown Protein                                | At5g06900 | CYP93D1 (Cytochrome P450, Family 93, Subfamily D, Polypeptide 1); Oxygen Binding        | 0.587<br>7 | 4.3826 | 5 | 91.7570 | -0.3658 | -0.0273 |  |
| OSJNBa0071113.11 | Unknown Protein                                | At4g30190 | AHA2 (Arabidopsis H(+)-Atpase 2); Atpase                                                | 0.104<br>1 | 1.4735 | 5 | 63.7800 | -0.6890 | -0.0130 |  |
| OSJNBa0071120.6  | Putative Ribosomal Protein S10p/S20e           | At3g47370 | 40S Ribosomal Protein S20 (RPS20B)                                                      | 0.155<br>8 | 3.2532 | 5 | 84.4260 | -0.5319 | -0.1823 |  |
| OSJNBa0071M09.1  | Hypothetical Protein                           | At3g11670 | DGD1 (DIGALACTOSYL DIACYLGLYCEROL DEFICIENT 1); Galactolipid Galactosyltransferase      | 0.384<br>3 | 4.3449 | 5 | 45.4120 | -0.0278 | -0.0443 |  |
| OSJNBa0072F16.1  | Unknown Protein                                | At1g12900 | Gapa-2                                                                                  | 0.112<br>5 | 4.2114 | 5 | 96.9470 | -0.4647 | -0.0488 |  |
| OSJNBa0075A22.29 | Putative 3-Isopropylmalate Dehydrogenase       | At1g80560 | 3-Isopropylmalate Dehydrogenase, Chloroplast, Putative                                  | 0.188<br>5 | 1.5778 | 5 | 54.3310 | -0.2059 | -0.0248 |  |
| OSJNBa0076F20.6  | Putative Gamma-Lyase                           | At1g64660 | ATMGL; Catalytic/ Methionine Gamma-Lyase                                                | 0.268<br>7 | 4.1218 | 5 | 98.4130 | -0.4154 | -0.0207 |  |
| OSJNBa0081L15.18 | Unknown Protein                                | At5g40760 | G6PD6 (GLUCOSE-6-PHOSPHATE DEHYDROGENASE 6); Glucose-6-Phosphate 1-Dehydrogenase        | 0.167<br>3 | 3.9571 | 5 | 44.5400 | 0.1572  | -0.0188 |  |
| OSJNBa0084K11.2  | Unknown Protein                                | At4g00430 | TMP-C (Plasma Membrane Intrinsic Protein 1;4)                                           | 0.260<br>2 | 3.9729 | 5 | 83.5710 | -0.4486 | -0.0688 |  |
| OSJNBa0085K21.33 | Tubulin Beta Chain                             | At5g62700 | TUB3 (Tubulin Beta-3); Structural Molecule                                              | 0.042<br>0 | 4.1371 | 5 | 82.0820 | -0.5376 | -0.0362 |  |
| OSJNBa0087C10.23 | Putative Vacuolar Protein Sorting-Associated   | At1g75850 | Unknown Protein                                                                         | 0.156<br>2 | 2.1790 | 5 | 43.2470 | 0.0035  | -0.0296 |  |
| OSJNBa0087M10.1  | Ribosomal Protein L15                          | At4g17390 | 60S Ribosomal Protein L15 (RPL15B)                                                      | 0.086<br>0 | 1.9825 | 5 | 76.7680 | -0.5544 | -0.0500 |  |
| OSJNBa0088H09.11 | Unknown Protein                                | At5g22250 | CCR4-NOT Transcription Complex Protein, Putative                                        | 0.392<br>3 | 3.8303 | 5 | 95.1920 | -0.4293 | -0.0246 |  |
| OSJNBa0088H09.2  | Unknown Protein                                | At3g48990 | AMP-Dependent Synthetase And Ligase Family Protein                                      | 0.237<br>6 | 4.4420 | 5 | 98.1480 | -0.3761 | -0.0347 |  |
| OSJNBa0091C12.3  | Unknown Protein                                | At4g38580 | ATFP6 (FARNESYLATED PROTEIN 6); Metal Ion Binding                                       | 0.274<br>8 | 3.3975 | 5 | 89.1160 | -0.3922 | -0.1000 |  |
| OSJNBa0091J19.11 | Putative Actin-Depolymerizing Factor           | At2g31200 | ADF6 (ACTIN DEPOLYMERIZING FACTOR 6); Actin Binding                                     | 0.146<br>2 | 3.2694 | 5 | 54.4780 | -0.2748 | -0.1069 |  |
| OSJNBa0094F01.1  | Putative 40S Ribosomal Protein S15             | At5g09510 | 40S Ribosomal Protein S15 (RPS15D)                                                      | 0.075<br>5 | 1.8193 | 5 | 79.4520 | -0.4348 | -0.1182 |  |
| OSJNBa0094P09.18 | Unknown Protein                                | At1g17200 | Integral Membrane Family Protein                                                        | 0.438<br>1 | 3.7869 | 5 | 94.4720 | -0.4082 | -0.1160 |  |
| OSJNBb0006N15.8  | Unknown Protein                                | At5g02610 | 60S Ribosomal Protein L35 (RPL35D)                                                      | 0.110      | 3.2154 | 5 | 92.3080 | -0.5839 | -0.1301 |  |

|                  |                                                |           |                                                                                                      |            |        |   |         |         |         |  |
|------------------|------------------------------------------------|-----------|------------------------------------------------------------------------------------------------------|------------|--------|---|---------|---------|---------|--|
|                  |                                                |           |                                                                                                      | 0          |        |   |         |         |         |  |
| OSJNBb0012A20.18 | Putative NADPH-Dependent Oxidoreductase        | At1g59960 | Aldo/Keto Reductase, Putative                                                                        | 0.413<br>3 | 4.0452 | 5 | 87.5000 | -0.4524 | -0.0664 |  |
| OSJNBb0012E24.2  | Unknown Protein                                | At3g47420 | Glycerol-3-Phosphate Transporter, Putative / Glycerol 3-Phosphate Permease, Putative                 | 0.255<br>8 | 3.3000 | 5 | 63.3470 | -0.3423 | -0.0285 |  |
| OSJNBb0015I02.14 | Putative Helicase                              | At2g42520 | DEAD Box RNA Helicase, Putative                                                                      | 0.173<br>7 | 1.9436 | 5 | 42.8100 | -0.1552 | -0.0407 |  |
| OSJNBb0015I02.15 | Serine/Threonine Protein Phosphatase PP2A-2    | At2g42500 | PP2A-4 (Protein Phosphatase 2A-4); Protein Phosphatase Type 2A/ Protein Serine/Threonine Phosphatase | 0.044<br>2 | 4.0534 | 5 | 42.1050 | 0.1082  | -0.0534 |  |
| OSJNBb0015N08.10 | Unknown Protein                                | At2g19330 | Leucine-Rich Repeat Family Protein                                                                   | 0.343<br>0 | 4.0683 | 5 | 89.4260 | -0.4651 | -0.0315 |  |
| OSJNBb0020J19.1  | Unknown Protein                                | At1g10940 | ASK1 (ARABIDOPSIS SERINE/THREONINE KINASE 1); Kinase                                                 | 0.181<br>9 | 4.0459 | 5 | 88.4960 | -0.5186 | -0.0408 |  |
| OSJNBb0020J19.10 | Unknown Protein                                | At1g77610 | Glucose-6-Phosphate/Phosphate Translocator-Related                                                   | 0.101<br>1 | 2.2928 | 5 | 54.2520 | -0.2628 | -0.0586 |  |
| OSJNBb0021A09.5  | Unknown Protein                                | At4g23630 | Bti1 (Virb2-Interacting Protein 1)                                                                   | 0.245<br>7 | 3.8163 | 5 | 68.0850 | -0.5221 | -0.0656 |  |
| OSJNBb0022F16.7  | Unknown Protein                                | At1g22920 | AJH1 (COP9-Signalosome 5A)                                                                           | 0.147<br>9 | 1.8409 | 5 | 60.1190 | -0.3982 | -0.0458 |  |
| OSJNBb0024A20.12 | Hypothetical Protein                           | At2g31670 | Unknown Protein                                                                                      | 0.623<br>0 | 3.8550 | 5 | 96.3300 | -0.3446 | -0.0683 |  |
| OSJNBb0024A20.19 | Putative 40S Ribosomal Protein                 | At2g31610 | 40S Ribosomal Protein S3 (RPS3A)                                                                     | 0.106<br>4 | 3.7976 | 5 | 67.7420 | -0.6869 | -0.0567 |  |
| OSJNBb0024J04.9  | Putative Dnaj Like Protein                     | At3g44110 | ATJ3 (Arabidopsis Thaliana Dnaj Homologue 3)                                                         | 0.124<br>8 | 4.1461 | 5 | 70.6810 | -0.6530 | -0.0343 |  |
| OSJNBb0036F07.3  | Putative Histone H2 Protein                    | At3g54560 | Histone H2A.F/Z                                                                                      | 0.110<br>7 | 2.5206 | 5 | 61.8320 | -0.5825 | -0.1336 |  |
| OSJNBb0037J12.26 | Putative Cytosolic Chaperonin Delta-Subunit    | At3g18190 | Chaperonin, Putative                                                                                 | 0.178<br>4 | 2.6095 | 5 | 61.2770 | -0.7013 | -0.0283 |  |
| OSJNBb0042K11.1  | Methylenetetrahydrofolate Reductase, 3-Partial | At3g59970 | MTHFR1 (METHYLENETETRAHYDROFOLATE REDUCTASE 1); Methylenetetrahydrofolate Reductase (NADPH)          | 0.122<br>1 | 4.1389 | 5 | 50.4250 | -0.2912 | -0.0297 |  |
| OSJNBb0046O12.20 | Glycerophosphoryl Diester Phosphodiesterase 2  | At1g66980 | Protein Kinase Family Protein / Glycerophosphoryl Diester Phosphodiesterase Family Protein           | 0.529<br>6 | 3.4574 | 5 | 55.4740 | -0.4094 | -0.1529 |  |
| OSJNBb0048E02.12 | Unknown Protein                                | At1g24020 | Bet V I Allergen Family Protein                                                                      | 0.429<br>3 | 3.3237 | 5 | 98.6110 | -0.4399 | -0.1439 |  |
| OSJNBb0048E02.7  | Unknown Protein                                | At5g47000 | Peroxidase, Putative                                                                                 | 0.424<br>0 | 4.0179 | 5 | 98.1600 | -0.4034 | -0.0600 |  |
| OSJNBb0048O22.3  | Putative Phosphoenolpyruvate Carboxykinase     | At4g37870 | ATP Binding / Phosphoenolpyruvate Carboxykinase (ATP)                                                | 0.163<br>6 | 2.9707 | 5 | 51.1670 | -0.1551 | -0.0132 |  |
| OSJNBb0056B16.16 | Putative Vps52 / Sac2 Family Protein           | At1g71270 | Pok (Poky Pollen Tube)                                                                               | 0.164<br>2 | 1.5171 | 5 | 45.4970 | -0.2117 | -0.0279 |  |
| OSJNBb0060J21.1  | Putative Ribosomal Protein S18A                | At4g09800 | RPS18C (S18 RIBOSOMAL PROTEIN); Structural Constituent Of Ribosome                                   | 0.091<br>8 | 3.4261 | 5 | 86.3950 | -0.5709 | -0.0664 |  |
| OSJNBb0060J21.19 | Putative Beta-1,3 Glucanase                    | At2g19440 | Glycosyl Hydrolase Family 17 Protein                                                                 | 0.278<br>8 | 4.2997 | 5 | 95.6610 | -0.4736 | -0.0401 |  |
| OSJNBb0062G19.5  | Expressed Protein                              | At5g42960 | Unknown Protein                                                                                      | 0.414<br>7 | 3.7170 | 5 | 88.5840 | -0.4281 | -0.0875 |  |
| OSJNBb0072M01.9  | Unknown Protein                                | At2g20450 | 60S Ribosomal Protein L14 (RPL14A)                                                                   | 0.122      | 1.6633 | 5 | 72.0930 | -0.5995 | -0.1299 |  |

|                  |                                                 |           |                                                                                      |        |        |   |         |         |         |
|------------------|-------------------------------------------------|-----------|--------------------------------------------------------------------------------------|--------|--------|---|---------|---------|---------|
|                  |                                                 |           |                                                                                      | 0      |        |   |         |         |         |
| OSJNBb0076N15.12 | Putative Fiddlehead-Like Protein                | At2g26250 | FDH (FIDDLEHEAD); Acyltransferase                                                    | 0.2118 | 4.3563 | 5 | 93.4630 | -0.4722 | -0.0245 |
| OSJNBb0076N15.5  | Putative Alpha 1 Subunit Of 20S Proteasome      | At2g05840 | PAA2 (20S Proteasome Alpha Subunit A2); Peptidase                                    | 0.1072 | 2.6626 | 5 | 62.8820 | -0.2311 | -0.0606 |
| OSJNBb0081B07.19 | Putative Hsp70 Binding Protein                  | At3g53800 | Armadillo/Beta-Catenin Repeat Family Protein                                         | 0.2900 | 3.0312 | 5 | 48.3050 | -0.2537 | -0.0433 |
| OSJNBb0092C08.10 | Putative Tawin2                                 | At1g78300 | GRF2 (GENERAL REGULATORY FACTOR 2); Protein Phosphorylated Amino Acid Binding        | 0.1490 | 3.8859 | 5 | 87.7640 | -0.4239 | -0.0265 |
| P0004D12.9       | Leaf Senescence Related Protein-Like            | At4g25360 | Unknown Protein                                                                      | 0.4876 | 2.1150 | 5 | 46.9730 | -0.1197 | -0.0502 |
| P0005A05.14      | Putative Isoflavone Reductase Homolog IRL       | At1g75280 | Isoflavone Reductase, Putative                                                       | 0.3499 | 4.0188 | 5 | 93.9390 | -0.4001 | -0.0392 |
| P0006C01.14      | Beta-Adaptin-Like Protein A                     | At5g11490 | Adaptin Family Protein                                                               | 0.2000 | 1.9166 | 5 | 48.8110 | -0.3061 | -0.0243 |
| P0010B10.27      | Putative Vacuolar Protein Sorting-Associated    | At4g21560 | Vacuolar Protein Sorting-Associated Protein 28 Family Protein / VPS28 Family Protein | 0.2365 | 3.7645 | 5 | 92.0000 | -0.5279 | -0.0977 |
| P0018C10.31      | Putative Stearoyl-Acyl Carrier Protein          | At1g43800 | Acyl-(Acyl-Carrier-Protein) Desaturase, Putative / Stearoyl-ACP Desaturase, Putative | 0.2562 | 4.0839 | 5 | 96.3170 | -0.4537 | -0.0528 |
| P0018C10.44      | Unknown Protein                                 | At1g21410 | F-Box Family Protein                                                                 | 0.2803 | 3.5825 | 5 | 65.3950 | -0.3621 | -0.0420 |
| P0026F07.24      | Putative Caffeoyl-Coa O-Methyltransferase 1     | At4g34050 | Caffeoyl-Coa 3-O-Methyltransferase, Putative                                         | 0.3872 | 3.7638 | 5 | 95.7980 | -0.3439 | -0.0548 |
| P0036E06.29      | Putative Dnak-Type Molecular Chaperone Bip      | At5g42020 | BIP (LUMINAL BINDING PROTEIN); ATP Binding                                           | 0.0771 | 4.4757 | 5 | 70.2340 | -0.6808 | -0.0310 |
| P0039H02.103     | Putative Syntaxin-Related Protein               | At5g08080 | SYP132 (Syntaxin 132); T-SNARE                                                       | 0.2776 | 1.9668 | 5 | 44.6430 | -0.1556 | -0.0525 |
| P0039H02.138-1   | Osrad6                                          | At2g02760 | ATUBC2 (UBIQUITING-CONJUGATING ENZYME 2); Ubiquitin-Protein Ligase                   | 0.0303 | 2.9878 | 5 | 65.3060 | -0.3329 | -0.1000 |
| P0410E03.13      | Putative H+-Transporting Atpase                 | At4g32530 | Vacuolar ATP Synthase, Putative / V-Atpase, Putative                                 | 0.0930 | 1.3681 | 5 | 58.9600 | -0.4395 | -0.0835 |
| P0410E03.24      | Unknown Protein                                 | At5g11420 | Unknown Protein                                                                      | 0.2693 | 4.1399 | 5 | 98.5880 | -0.4053 | -0.0686 |
| P0413A11.18      | Peroxisomal Fatty Acid Beta-Oxidation           | At4g29010 | AIM1 (ABNORMAL INFLORESCENCE MERISTEM); Enoyl-Coa Hydratase                          | 0.2605 | 2.9296 | 5 | 42.7130 | -0.0392 | -0.0348 |
| P0413C03.8       | Putative Selenium Binding Protein               | At4g14030 | Selenium-Binding Protein, Putative                                                   | 0.1998 | 2.6332 | 5 | 51.9650 | -0.1639 | -0.0413 |
| P0413H11.35      | Putative Chlorophyll A/B-Binding Protein        | At3g47470 | LHCA4 (Photosystem I Light Harvesting Complex Gene 4); Chlorophyll Binding           | 0.1643 | 3.8056 | 5 | 91.3790 | -0.4747 | -0.0627 |
| P0415B12.4       | RNA Binding Protein Rp120                       | At5g07350 | Tudor Domain-Containing Protein / Nuclease Family Protein                            | 0.2310 | 2.6851 | 5 | 40.3740 | -0.1830 | -0.0190 |
| P0431A03.26      | Ribonuclease                                    | At1g26820 | RNS3 (RIBONUCLEASE 3); Endoribonuclease                                              | 0.3802 | 3.7255 | 5 | 97.7170 | -0.3816 | -0.1371 |
| P0440D10.18      | Putative Tetrafunctional Protein Of Glyoxysomal | At3g06860 | MFP2 (MULTIFUNCTIONAL PROTEIN); Enoyl-Coa Hydratase                                  | 0.1917 | 2.1858 | 5 | 39.1240 | -0.1143 | -0.0220 |
| P0452F04.18-2    | Putative Non-Transporter ABC Protein Abcf1      | At1g64550 | ATGCN3 (Arabidopsis Thaliana General Control Non-Repressible 3)                      | 0.0915 | 2.0939 | 5 | 43.8360 | -0.1047 | -0.0325 |
| P0453E03.111     | Putative Translation Elongation Factor Eef-1    | At5g19510 | Elongation Factor 1B Alpha-Subunit 2 (Eef1balpha2)                                   | 0.2039 | 2.4060 | 5 | 60.5770 | -0.3148 | -0.0754 |
| P0454H12.12      | Putative 2,3-Bisphosphoglycerate-               | At3g08590 | 2,3-Biphosphoglycerate-Independent                                                   | 0.110  | 3.5077 | 5 | 44.8860 | -0.4915 | -0.0304 |

|                |                                                |           |                                                                                     |        |        |   |         |         |         |
|----------------|------------------------------------------------|-----------|-------------------------------------------------------------------------------------|--------|--------|---|---------|---------|---------|
|                | Independent                                    |           | Phosphoglycerate Mutase, Putative / Phosphoglyceromutase, Putative                  | 2      |        |   |         |         |         |
| P0459B01.28    | Putative 60S Ribosomal Protein L12             | At2g37190 | 60S Ribosomal Protein L12 (RPL12A)                                                  | 0.0937 | 3.4980 | 5 | 95.5130 | -0.5168 | -0.1175 |
| P0461B08.25    | Aquaporin                                      | At4g23400 | PIP1;5/PIP1D (Plasma Membrane Intrinsic Protein 1;5); Water Channel                 | 0.0858 | 1.4407 | 5 | 77.5800 | -0.5769 | -0.0363 |
| P0461D06.32    | Putative Elongation Factor 2                   | At1g56075 | Putative Elongation Factor                                                          | 0.0638 | 1.9651 | 5 | 51.7330 | -0.6069 | -0.0155 |
| P0468B07.27    | Proteasome Subunit Alpha Type 3                | At2g27020 | PAG1 (20S Proteasome Alpha Subunit G1); Peptidase                                   | 0.0997 | 2.1817 | 5 | 44.3480 | -0.3088 | -0.0502 |
| P0470D12.125   | Putative Stress-Related Protein                | At3g05500 | Rubber Elongation Factor (REF) Family Protein                                       | 0.4700 | 2.7495 | 5 | 94.0930 | -0.4109 | -0.0416 |
| P0482F12.1-1   | Bax Inhibitor-1 (BI-1) (Osbi-1)                | At5g47120 | Atbi-1 (Arabidopsis Bax Inhibitor 1)                                                | 0.2048 | 3.9011 | 5 | 76.7630 | -0.5884 | -0.0743 |
| P0483C08.42    | Putative 40S Ribosomal Protein S8              | At5g20290 | 40S Ribosomal Protein S8 (RPS8A)                                                    | 0.1066 | 3.4509 | 5 | 62.0190 | -0.4968 | -0.0859 |
| P0483D07.5     | Putative Oligosaccharyl Transferase STT3       | At5g19690 | STT3A (STAUROSPORIN AND TEMPERATURE SENSITIVE 3-LIKE A); Oligosaccharyl Transferase | 0.1375 | 1.7036 | 5 | 45.5150 | -0.1423 | -0.0304 |
| P0485G01.26    | Peroxiredoxin                                  | At1g65970 | TPX2 (THIOREDOXIN-DEPENDENT PEROXIDASE 2); Antioxidant                              | 0.2080 | 3.6456 | 5 | 63.6360 | -0.6066 | -0.1698 |
| P0487D09.8     | Glutamine Synthetase Shoot Isozyme             | At5g37600 | ATGSR1 (Arabidopsis Thaliana Glutamine Synthase Clone R1); Glutamate-Ammonia Ligase | 0.0859 | 4.0657 | 5 | 74.7750 | -0.6509 | -0.0309 |
| P0489B03.15    | Putative 60S Ribosomal Protein                 | At1g08360 | 60S Ribosomal Protein L10A (RPL10aA)                                                | 0.0885 | 3.4897 | 5 | 54.0820 | -0.4188 | -0.0418 |
| P0497A05.15    | Unknown Protein                                | At1g05690 | BT3 (BTB And TAZ Domain Protein 3); Protein Binding / Transcription Regulator       | 0.6260 | 3.9244 | 5 | 92.0250 | -0.5151 | -0.0628 |
| P0498H04.29    | Putative Fructokinase                          | At4g10260 | Pfkb-Type Carbohydrate Kinase Family Protein                                        | 0.2092 | 4.0458 | 5 | 94.9530 | -0.5097 | -0.0604 |
| P0506B12.23    | Unknown Protein                                | At5g18520 | Unknown Protein                                                                     | 0.3216 | 4.2565 | 5 | 81.0870 | -0.5108 | -0.0350 |
| P0506B12.36    | 40S Ribosomal Protein                          | At5g02960 | 40S Ribosomal Protein S23 (RPS23B)                                                  | 0.0384 | 3.1279 | 5 | 59.2590 | -0.5697 | -0.1246 |
| P0523B07.46    | Putative Ribosomal Protein L17                 | At1g27400 | 60S Ribosomal Protein L17 (RPL17A)                                                  | 0.1317 | 3.5172 | 5 | 60.8700 | -0.5771 | -0.0918 |
| P0524G08.102   | Putative Xylulose Kinase                       | At5g49650 | Xylulose Kinase, Putative                                                           | 0.2293 | 2.7379 | 5 | 48.7520 | -0.1548 | -0.0363 |
| P0524G08.123   | Transport Protein Particle Component Bet3-Like | At5g54750 | Transport Protein Particle (TRAPP) Component Bet3, Putative                         | 0.1060 | 1.9299 | 5 | 56.3950 | -0.5312 | -0.1118 |
| P0534A03.127   | Putative Vacuolar ATP Synthase Subunit H       | At3g42050 | Vacuolar ATP Synthase Subunit H Family Protein                                      | 0.1834 | 1.9300 | 5 | 46.9770 | -0.2664 | -0.0356 |
| P0544H11.38    | 26S Proteasome Regulatory Particle Triple-A    | At5g19990 | ATSUG1; Atpase                                                                      | 0.0469 | 4.1880 | 5 | 51.1450 | -0.4103 | -0.0488 |
| P0567H04.15    | Chlorophyll A/B-Binding Protein                | At5g01530 | Chlorophyll A-B Binding Protein CP29 (LHCB4)                                        | 0.1253 | 3.8943 | 5 | 97.8100 | -0.3769 | -0.0645 |
| P0582D05.130-1 | 60S Acidic Ribosomal Protein P0                | At2g40010 | 60S Acidic Ribosomal Protein P0 (RPP0A)                                             | 0.1665 | 1.6637 | 5 | 68.1360 | -0.6984 | -0.0467 |
| P0585B01.3     | Putative Proteasome Subunit Alpha Type 1       | At5g42790 | PAF1 (Proteasome Alpha Subunit F1); Peptidase                                       | 0.2324 | 3.8695 | 5 | 73.0090 | -0.5059 | -0.1110 |
| P0594D10.135   | Putative 40S Ribosomal Protein S6              | At5g10360 | EMB3010 (EMBRYO DEFECTIVE 3010); Structural Constituent Of Ribosome                 | 0.0862 | 2.0656 | 5 | 69.0380 | -0.6865 | -0.0464 |

|                |                                                 |           |                                                                                                 |        |        |   |         |         |         |
|----------------|-------------------------------------------------|-----------|-------------------------------------------------------------------------------------------------|--------|--------|---|---------|---------|---------|
| P0616D06.101   | Putative 60S Ribosomal Protein L27a             | At1g23290 | RPL27A (RIBOSOMAL PROTEIN L27A); Structural Constituent Of Ribosome                             | 0.1504 | 3.2977 | 5 | 97.1830 | -0.4953 | -0.0925 |
| P0616D06.117   | Elongation Factor 1 Beta                        | At1g30230 | Elongation Factor 1-Beta / EF-1-Beta                                                            | 0.2082 | 2.2052 | 5 | 49.0570 | -0.4194 | -0.0498 |
| P0617A09.16    | Putative Potassium Transporter HAK2p            | At5g14880 | Potassium Transporter, Putative                                                                 | 0.2486 | 2.6821 | 5 | 57.8800 | -0.3037 | -0.0278 |
| P0623F08.37    | Putative Sorbitol Dehydrogenase                 | At5g51970 | Sorbitol Dehydrogenase, Putative / L-Iditol 2-Dehydrogenase, Putative                           | 0.1685 | 4.2522 | 5 | 92.6690 | -0.3354 | -0.0447 |
| P0643F09.4     | Alcohol Dehydrogenase Class III                 | At5g43940 | ADH2 (ALCOHOL DEHYDROGENASE 2); Formaldehyde Dehydrogenase (Glutathione)                        | 0.0705 | 1.4938 | 5 | 52.4860 | -0.4040 | -0.0580 |
| P0654B04.16-2  | WD-40 Repeat Protein-Like                       | At3g13340 | WD-40 Repeat Family Protein                                                                     | 0.1988 | 3.7570 | 5 | 45.3740 | -0.1349 | -0.0338 |
| P0663C08.13    | Putative Vacuolar ATP Synthase Subunit C        | At1g12840 | Det3 (De-Etiolated 3)                                                                           | 0.1843 | 2.6392 | 5 | 55.4600 | -0.5104 | -0.0300 |
| P0665C04.10    | Putative Pyruvate Dehydrogenase E1 Beta Subunit | At5g50850 | Pyruvate Dehydrogenase E1 Component Beta Subunit, PDHE1-B (PDH2)                                | 0.1182 | 1.8640 | 5 | 43.1030 | -0.2253 | -0.0578 |
| P0666G04.4     | Putative Heat-Shock Protein                     | At1g79930 | HSP91 (Heat Shock Protein 91)                                                                   | 0.1631 | 1.8775 | 5 | 48.3030 | -0.4048 | -0.0205 |
| P0669G09.19    | Putative Phosphoglycerate Kinase, Cytosolic     | At1g79550 | Pgk (Phosphoglycerate Kinase)                                                                   | 0.0984 | 1.9005 | 5 | 55.3190 | -0.6038 | -0.0289 |
| P0672C09.22    | Putative 1-Aminocyclopropane-1-Carboxylate      | At2g19590 | ACO1 (ACC OXIDASE 1); 1-Aminocyclopropane-1-Carboxylate Oxidase                                 | 0.4343 | 3.9172 | 5 | 95.9320 | -0.4622 | -0.0516 |
| P0672D08.5     | Putative 40S Ribosomal Protein S5               | At2g37270 | ATRPS5B (RIBOSOMAL PROTEIN 5B); Structural Constituent Of Ribosome                              | 0.1292 | 3.5751 | 5 | 82.7230 | -0.5882 | -0.1050 |
| P0676F10.7     | Unknown Protein                                 | At5g15890 | Unknown Protein                                                                                 | 0.4455 | 4.1849 | 5 | 95.3490 | -0.3300 | -0.0596 |
| P0676H02.1     | Putative Glutathione S-Transferase              | At3g09270 | ATGSTU8 (Arabidopsis Thaliana Glutathione S-Transferase (Class Tau) 8); Glutathione Transferase | 0.4856 | 3.7358 | 5 | 92.1950 | -0.5746 | -0.0570 |
| P0676H03_3     | ADP-Ribosylation Factor                         | At2g47170 | ARF1A1c (ADP-RIBOSYLATION FACTOR 1); GTP Binding / Phospholipase Activator/ Protein Binding     | 0.0281 | 2.5038 | 5 | 64.7060 | -0.6360 | -0.0641 |
| P0679C08.30    | 40S Ribosomal Protein S20                       | At5g62300 | 40S Ribosomal Protein S20 (RPS20C)                                                              | 0.1458 | 2.3864 | 5 | 77.2730 | -0.5084 | -0.1402 |
| P0681F05.106-2 | Putative Thiamine Biosynthesis Protein          | At5g54770 | Thi1 (Thiazole Requiring)                                                                       | 0.1987 | 4.0024 | 5 | 95.5480 | -0.4598 | -0.0490 |
| P0683F02.22    | Unknown Protein                                 | At3g48410 | Hydrolase, Alpha/Beta Fold Family Protein                                                       | 0.4460 | 4.1532 | 5 | 87.3460 | -0.4557 | -0.0594 |
| P0684A08.36    | Putative Amino Acid Transport Protein           | At4g38250 | Amino Acid Transporter Family Protein                                                           | 0.3663 | 4.2088 | 5 | 93.9610 | -0.4665 | -0.0382 |
| P0690E03.3     | Putative 12-Oxophytodieneoate Reductase         | At2g06050 | Opr3 (Opda-Reductase 3)                                                                         | 0.2267 | 4.2639 | 5 | 65.1600 | -0.4324 | -0.0604 |
| P0696G06.30    | Putative 60S Ribosomal Protein L5               | At5g39740 | 60S Ribosomal Protein L5 (RPL5B)                                                                | 0.1740 | 1.7972 | 5 | 57.8570 | -0.6181 | -0.0415 |
| P0698G06.1     | Putative Sec61 Alpha Form 2                     | At2g34250 | Protein Translocase                                                                             | 0.0609 | 1.5492 | 5 | 44.3960 | -0.2436 | -0.0398 |
| P0700F06.14    | Putative Tumor Differentially Expressed Protein | At1g16180 | TMS Membrane Family Protein / Tumour Differentially Expressed (TDE) Family Protein              | 0.1657 | 1.5402 | 5 | 66.0850 | -0.3529 | -0.0657 |
| P0701F11.5-1   | Putative CBL-Interacting Protein Kinase         | At5g10930 | CIPK5 (CBL-INTERACTING PROTEIN KINASE 5); Kinase                                                | 0.3446 | 4.2106 | 5 | 94.7990 | -0.4912 | -0.0200 |
| P0703C03.43    | 60S Ribosomal Protein L7A                       | At3g62870 | 60S Ribosomal Protein L7A (RPL7aB)                                                              | 0.093  | 3.7805 | 5 | 74.0740 | -0.6874 | -0.0589 |

|              |                                            |           |                                                                            |        |        |   |         |         |         |
|--------------|--------------------------------------------|-----------|----------------------------------------------------------------------------|--------|--------|---|---------|---------|---------|
|              |                                            |           |                                                                            | 8      |        |   |         |         |         |
| P0706E03.4-1 | Putative Eukaryotic Translation Initiation | At1g36730 | Eukaryotic Translation Initiation Factor 5, Putative / Eif-5, Putative     | 0.2336 | 4.1915 | 5 | 52.1950 | -0.6124 | -0.0236 |
| P0724B10.3-1 | Putative Protein Kinase Yaka               | At5g35980 | Kinase                                                                     | 0.3884 | 2.9875 | 5 | 32.8220 | 0.3121  | -0.0167 |
| W455ERIPDK   | Putative GTP-Binding Protein               | At1g02130 | ATRAB1B (Arabidopsis Thaliana Responsive To Abscisic Acid 1B); GTP Binding | 0.0690 | 3.6432 | 5 | 52.8210 | -0.2578 | -0.0463 |



**Supplementary Table 5:** Details of rice-Arabidopsis tissue specific homologous gene-pairs with their corresponding short functional description. Dn represents non-synonymous substitution rates, Ds represents synonymous substitution rates, Exp\_rank corresponds to expression rank for individual rice genes, GC<sub>3</sub> represents GC content at synonymous third codon position. wRn stands for error minimization values and FFE represents free folding energy of rice genes

| <i>Rice Tissue specific Gene ID</i> | <i>Functional description</i>                 | <i>Arabidopsis Gene ID</i> | <i>Functional description</i>                                  | <i>Dn</i> | <i>Ds</i> | <i>Exp_rank</i> | <i>GC<sub>3</sub></i> | <i>wRn</i> | <i>FFE</i> |
|-------------------------------------|-----------------------------------------------|----------------------------|----------------------------------------------------------------|-----------|-----------|-----------------|-----------------------|------------|------------|
| B1029H08.10                         | Putative Thylakoid Lumenal 21.5 Kda Protein,  | At4g15510                  | Calcium Ion Binding                                            | 0.2990    | 2.2258    | 1               | 68.5340               | -0.2527    | -0.1016    |
| B1040D09.4                          | Putative RNA Helicase                         | At5g08610                  | DEAD Box RNA Helicase (RH26)                                   | 0.2765    | 2.2458    | 1               | 49.3670               | -0.2445    | -0.0345    |
| B1063H10.8                          | Hypothetical Protein                          | At4g30410                  | Unknown Protein                                                | 0.7381    | 3.6047    | 1               | 92.4320               | -0.4150    | -0.1042    |
| B1064G04.16                         | Similar To Membrane-Associated Salt-Inducible | At1g10910                  | Unknown Protein                                                | 0.4240    | 4.5767    | 1               | 50.9200               | -0.0106    | -0.0192    |
| B1065E10.20                         | Putative Serine/Threonine Protein Kinase      | At1g11050                  | Protein Kinase Family Protein                                  | 0.5110    | 4.5865    | 1               | 94.2220               | -0.4435    | -0.0351    |
| B1070A12.16                         | Hypothetical Protein                          | At2g16030                  | Unknown Protein                                                | 0.6135    | 3.2827    | 1               | 85.7140               | -0.4219    | -0.1167    |
| B1074C08.21                         | Putative RNA-Directed RNA Polymerase          | At3g49500                  | RDR6 (RNA-DEPENDENT RNA POLYMERASE 6); Nucleic Acid Binding    | 0.3689    | 5.0978    | 1               | 64.4660               | -0.1155    | -0.0262    |
| B1100D10.34                         | Putative Serine/Threonine Kinase              | At4g27300                  | S-Locus Protein Kinase, Putative                               | 0.5700    | 4.7054    | 1               | 39.9480               | 0.3214     | -0.0118    |
| B1120F06.101                        | Aspartate-Glutamate Carrier                   | At4g39460                  | SAMC1/SAMT1 (S-ADENOSYLMETHIONINE CARRIER 1, SAM TRANSPORTER1) | 0.2440    | 2.1642    | 1               | 29.6300               | 0.1555     | -0.0444    |

|             |                                            |           |                                                                                                   |        |        |   |         |         |         |
|-------------|--------------------------------------------|-----------|---------------------------------------------------------------------------------------------------|--------|--------|---|---------|---------|---------|
|             |                                            |           | ); S-Adenosylmethionine Transporter/Binding                                                       |        |        |   |         |         |         |
| B1121A12.18 | Putative Auxin-Independent Growth Promoter | At5g15740 | Unknown Protein                                                                                   | 0.2267 | 2.2281 | 1 | 49.7930 | 0.0583  | -0.0235 |
| B1130G10.20 | Unknown Protein                            | At4g18930 | Cyclic Phosphodiesterase                                                                          | 0.5182 | 3.6360 | 1 | 80.0000 | -0.3106 | -0.1384 |
| B1131B07.15 | Putative Zinc Finger Protein               | At5g20220 | Zinc Knuckle (CCHC-Type) Family Protein                                                           | 0.3287 | 3.8758 | 1 | 36.9650 | 0.2923  | -0.0405 |
| B1142C05.30 | Rev Interacting Protein-Like               | At5g08420 | RNA Binding                                                                                       | 0.2947 | 1.8766 | 1 | 57.5670 | -0.5393 | -0.0633 |
| B1144D11.19 | Putative Glutathione S-Transferase Osgstu4 | At1g69920 | ATGSTU12 (Arabidopsis Thaliana Glutathione S-Transferase (Class Tau) 12); Glutathione Transferase | 0.5496 | 3.8498 | 1 | 96.1370 | -0.3959 | -0.1092 |
| B1144D11.26 | Putative Zinc Protease PQQL                | At5g56730 | Peptidase M16 Family Protein / Insulinase Family Protein                                          | 0.2114 | 1.9441 | 1 | 46.0870 | -0.0042 | -0.0297 |
| B1147B12.16 | Putative Sulfate Transporter-Like          | At2g25680 | Sulfate Transporter                                                                               | 0.3613 | 4.4098 | 1 | 91.1360 | -0.4227 | -0.0229 |
| B1148D12.5  | Putative Receptor Protein Kinase           | At5g49760 | Leucine-Rich Repeat Family Protein / Protein Kinase Family Protein                                | 0.4936 | 4.7852 | 1 | 40.2950 | 0.0906  | -0.0113 |
| B1168F12.22 | Transporter-Like Protein                   | At1g78130 | UNE2 (Unfertilized Embryo Sac 2); Carbohydrate Transporter/ Sugar Porter                          | 0.2823 | 3.4873 | 1 | 72.7820 | -0.4031 | -0.0290 |
| B1234D02.6  | Unknown Protein                            | At5g43410 | Ethylene-Responsive Factor, Putative                                                              | 0.5074 | 2.4717 | 1 | 85.7140 | -0.1602 | -0.1203 |
| B1248C03.14 | Unknown Protein                            | At4g21630 | Subtilase Family Protein                                                                          | 0.5509 | 4.1884 | 1 | 54.0540 | -0.0284 | -0.0447 |
| B1249D05.19 | Putative                                   | At1g50060 | Pathogenesis-                                                                                     | 0.5917 | 3.4806 | 1 | 93.3330 | -0.2766 | -0.1337 |

|                 |                                          |           |                                                                                                    |        |        |   |         |         |         |
|-----------------|------------------------------------------|-----------|----------------------------------------------------------------------------------------------------|--------|--------|---|---------|---------|---------|
|                 | Pathogenesis-Related Protein             |           | Related Protein, Putative                                                                          |        |        |   |         |         |         |
| B1249D05.22     | Putative Pathogenesis-Related Protein    | At5g66590 | Allergen V5/Tpx-1-Related Family Protein                                                           | 0.7012 | 3.5266 | 1 | 95.8820 | -0.2895 | -0.1494 |
| B1250G12.17     | Putative Response Regulator              | At5g24470 | APRR5 (PSEUDO-RESPONSE REGULATOR 5); Transcription Regulator                                       | 0.8337 | 3.5593 | 1 | 82.0140 | -0.1953 | -0.1673 |
| B1250G12.8      | Unknown Protein                          | At3g01440 | Oxygen Evolving Enhancer 3 (Psbq) Family Protein                                                   | 0.7690 | 3.2583 | 1 | 87.9630 | -0.5581 | -0.1193 |
| B1339H09.17     | Putative Monoglyceride Lipase            | At1g73480 | Hydrolase, Alpha/Beta Fold Family Protein                                                          | 0.2955 | 2.0306 | 1 | 38.6210 | 0.2568  | -0.0539 |
| B1342F01.34     | Putative UDP-Glycosyltransferase 85A8    | At1g22370 | UDP-Glucuronosyl/UDP-Glucosyl Transferase Family Protein                                           | 0.3849 | 4.2901 | 1 | 95.6800 | -0.3893 | -0.0383 |
| B1364A02.2      | Putative LRR Receptor-Like Kinase        | At1g17230 | Leucine-Rich Repeat Family Protein / Protein Kinase Family Protein                                 | 0.3668 | 5.0467 | 1 | 71.1690 | -0.4477 | -0.0299 |
| H0302E05.5      | Putative Protein                         | At3g21610 | Unknown Protein                                                                                    | 0.4010 | 2.3592 | 1 | 48.7180 | 0.0869  | -0.1485 |
| OJ000126_13.7   | Unknown Protein                          | At3g52600 | ATCWINV2 (ARABIDOPSIS THALIANA CELL WALL INVERTASE 2); Hydrolase, Hydrolyzing O-Glycosyl Compounds | 0.3544 | 4.3374 | 1 | 95.1610 | -0.4505 | -0.0401 |
| OJ1001_G01.3    | Putative Transmembrane Protein           | At5g12130 | Pde149 (Pigment Defective 149)                                                                     | 0.3452 | 1.7963 | 1 | 48.3330 | -0.1912 | -0.0504 |
| OJ1003_H02.1 25 | Putative RSH, Disease Resistance-Related | At1g54130 | RSH3 (RELA/SPOT HOMOLOG 3); Catalytic                                                              | 0.3900 | 4.5699 | 1 | 59.8920 | -0.2779 | -0.0402 |
| OJ1004_A11.2    | Lipase Class 3-                          | At5g67050 | Lipase Class 3                                                                                     | 0.4744 | 4.2971 | 1 | 89.4510 | -0.3710 | -0.0436 |

|                |                                                 |           |                                                                                           |        |        |   |         |         |         |
|----------------|-------------------------------------------------|-----------|-------------------------------------------------------------------------------------------|--------|--------|---|---------|---------|---------|
| 5              | Like                                            |           | Family Protein                                                                            |        |        |   |         |         |         |
| OJ1004_A11.27  | Putative Flavonol Synthase                      | At5g08640 | Fls (Flavonol Synthase)                                                                   | 0.3452 | 4.0410 | 1 | 94.7880 | -0.3984 | -0.0876 |
| OJ1004C08.17   | Putative Protein Kinase                         | At2g17220 | Protein Kinase, Putative                                                                  | 0.3734 | 4.2889 | 1 | 86.1410 | -0.3472 | -0.0505 |
| OJ1014_E02.13  | Unknown Protein                                 | At5g49410 | Unknown Protein                                                                           | 0.3805 | 3.3226 | 1 | 91.4060 | -0.4775 | -0.1697 |
| OJ1014_G12.22  | Unknown Protein                                 | At2g26690 | Nitrate Transporter (NTP2)                                                                | 0.2618 | 4.4843 | 1 | 99.0880 | -0.4620 | -0.0304 |
| OJ1019_E02.23  | Putative Lectin-Like Protein Kinase             | At5g10530 | Lectin Protein Kinase, Putative                                                           | 0.5282 | 4.4905 | 1 | 86.1010 | -0.4064 | -0.0264 |
| OJ1020_C02.24  | Putative Pentatricopeptide (PPR)                | At1g02060 | Pentatricopeptide (PPR) Repeat-Containing Protein                                         | 0.6182 | 2.7819 | 1 | 67.4060 | -0.4083 | -0.0338 |
| OJ1031_C12.26  | Putative Kinetochore Protein                    | At1g75950 | SKP1 (ARABIDOPSIS SKP1 HOMOLOGUE); Ubiquitin-Protein Ligase                               | 0.3169 | 3.4511 | 1 | 84.3140 | -0.4669 | -0.0844 |
| OJ1058_A12.123 | Serine/Threonine Kinase Receptor Precursor-Like | At4g23280 | Protein Kinase, Putative                                                                  | 0.6518 | 2.5898 | 1 | 64.8040 | -0.3705 | -0.0158 |
| OJ1060_D03.125 | Amino Acid Acetyltransferase(N-Acetylglutamate  | At2g22910 | GCN5-Related N-Acetyltransferase (GNAT) Family Protein / Amino Acid Kinase Family Protein | 0.3974 | 1.9142 | 1 | 40.1870 | -0.0275 | -0.0426 |
| OJ1063_D06.13  | Putative DNA-Binding Protein                    | At3g61260 | DNA-Binding Family Protein / Remorin Family Protein                                       | 0.4461 | 2.1011 | 1 | 68.1530 | 0.0122  | -0.1128 |
| OJ1081D05.5    | Putative NADPH-Dependent Oxidoreductase         | At1g59950 | Aldo/Keto Reductase, Putative                                                             | 0.3789 | 3.9622 | 1 | 94.6840 | -0.5039 | -0.0891 |
| OJ1111_E05.24  | Putative Latex Protein Allergen                 | At2g26560 | PLP2 (PHOSPHOLIPASE A 2A); Nutrient Reservoir                                             | 0.3572 | 4.2113 | 1 | 93.4940 | -0.4580 | -0.0538 |
| OJ1115_B01.19  | Putative Cytochrome P450                        | At3g26210 | CYP71B23 (Cytochrome P450, Family 71,                                                     | 0.7027 | 4.4156 | 1 | 80.5500 | -0.4504 | -0.0298 |

|                    |                                                          |           |                                                                                                                                             |        |        |   |         |         |         |
|--------------------|----------------------------------------------------------|-----------|---------------------------------------------------------------------------------------------------------------------------------------------|--------|--------|---|---------|---------|---------|
|                    |                                                          |           | Subfamily B,<br>Polypeptide 23);<br>Oxygen Binding                                                                                          |        |        |   |         |         |         |
| OJ1115_D04.1       | Unknown Protein                                          | At1g12790 | Unknown Protein                                                                                                                             | 0.3041 | 1.9592 | 1 | 40.2170 | -0.1920 | -0.0449 |
| OJ1115_D04.4       | Putative AAA-<br>Type Atpase                             | At5g17760 | AAA-Type Atpase<br>Family Protein                                                                                                           | 0.4802 | 4.3012 | 1 | 83.4840 | -0.5281 | -0.0576 |
| OJ1116_H09.4       | Putative<br>Potassium<br>Channel                         | At5g46370 | KCO2 (CA2+<br>ACTIVATED<br>OUTWARD<br>RECTIFYING K+<br>CHANNEL 2);<br>Calcium Ion<br>Binding / Outward<br>Rectifier<br>Potassium<br>Channel | 0.6365 | 2.4215 | 1 | 43.9680 | 0.2726  | -0.0198 |
| OJ1119_B04.1<br>8  | Putative Hexose<br>Transporter                           | At5g26250 | Sugar<br>Transporter,<br>Putative                                                                                                           | 0.3202 | 4.3416 | 1 | 95.9760 | -0.4039 | -0.0439 |
| OJ1119_D01.2<br>2  | Putative<br>Armadillo Repeat<br>Containing<br>Protein    | At4g21350 | B80; Binding /<br>Ubiquitin-Protein<br>Ligase                                                                                               | 0.5942 | 4.2534 | 1 | 92.0590 | -0.4196 | -0.0612 |
| OJ1123_C12.1<br>06 | Hypothetical<br>Protein                                  | At3g55950 | Protein Kinase<br>Family Protein                                                                                                            | 1.2350 | 3.6084 | 1 | 58.0150 | -0.2257 | -0.1057 |
| OJ1126_B10.1<br>4  | Putative<br>Cinnamoyl Coa<br>Reductase                   | At5g14700 | Cinnamoyl-Coa<br>Reductase-<br>Related                                                                                                      | 0.5448 | 3.4206 | 1 | 82.9550 | -0.3744 | -0.0478 |
| OJ1135_F06.11      | Putative Kelch<br>Repeat-<br>Containing F-<br>Box Family | At1g55270 | Kelch Repeat-<br>Containing F-Box<br>Family Protein                                                                                         | 0.4664 | 4.3381 | 1 | 92.2550 | -0.4442 | -0.0253 |
| OJ1135_F06.7       | Unknown Protein                                          | At2g25570 | Binding                                                                                                                                     | 0.2665 | 2.5745 | 1 | 50.7410 | -0.3501 | -0.0919 |
| OJ1150_A11.2<br>6  | Two-Component<br>Phosphorelay<br>Mediator HP2            | At1g03430 | AHP5<br>(HISTIDINE-<br>CONTAINING<br>PHOSPHOTRAN<br>SFER FACTOR<br>5); Histidine<br>Phosphotransfer<br>Kinase                               | 0.5441 | 3.4116 | 1 | 73.0500 | -0.6471 | -0.1000 |
| OJ1159_D09.2<br>3  | Lipase-Like<br>Protein                                   | At4g18550 | Lipase Class 3<br>Family Protein                                                                                                            | 0.4252 | 2.4704 | 1 | 52.4930 | -0.1688 | -0.0405 |
| OJ1165_F02.12<br>5 | Putative ATP-<br>Dependent<br>Proteinase LON2            | At5g26860 | LON_ARA_ARA<br>(Lon Protease<br>Homolog Gene);                                                                                              | 0.1768 | 3.7008 | 1 | 40.5380 | -0.0639 | -0.0268 |

|                    |                                                       |           |                                                                                                   |        |        |   |         |         |         |
|--------------------|-------------------------------------------------------|-----------|---------------------------------------------------------------------------------------------------|--------|--------|---|---------|---------|---------|
|                    |                                                       |           | ATP Binding /<br>ATP-Dependent<br>Peptidase/<br>Serine-Type<br>Peptidase                          |        |        |   |         |         |         |
| OJ1167_G06.1<br>04 | Hypothetical<br>Protein                               | At3g56220 | Unknown Protein                                                                                   | 0.4583 | 3.0151 | 1 | 72.7270 | -0.2636 | -0.1401 |
| OJ1202_E07.1<br>7  | Zinc Finger-Like                                      | At3g09320 | Zinc Finger<br>(DHHC Type)<br>Family Protein                                                      | 0.4871 | 1.8989 | 1 | 64.4190 | -0.1588 | -0.1114 |
| OJ1212_A08.1<br>2  | Unknown Protein                                       | At1g73240 | Unknown Protein                                                                                   | 0.4315 | 1.8041 | 1 | 38.4620 | 0.0880  | -0.0447 |
| OJ1212_C01.1<br>5  | Putative Lung<br>Seven<br>Transmembrane<br>Receptor 1 | At3g09570 | Unknown Protein                                                                                   | 0.4930 | 4.2668 | 1 | 93.8070 | -0.4371 | -0.0316 |
| OJ1217_D10.1<br>0  | Endo-1,3                                              | At3g23570 | Dienelactone<br>Hydrolase Family<br>Protein                                                       | 0.5317 | 3.5968 | 1 | 40.2440 | 0.0420  | -0.0671 |
| OJ1217_D10.2<br>5  | Putative Flavonol<br>3-<br>Sulfotransferase           | At1g28170 | Sulfotransferase<br>Family Protein                                                                | 0.5955 | 4.0231 | 1 | 81.9770 | -0.3902 | -0.0458 |
| OJ1217_D10.2<br>7  | Putative Flavonol<br>3-<br>Sulfotransferase           | At5g43690 | Sulfotransferase<br>Family Protein                                                                | 0.6635 | 4.0553 | 1 | 74.9240 | -0.3660 | -0.0451 |
| OJ1224_G08.2<br>1  | SWP1 Protein-<br>Like                                 | At3g04740 | Swp<br>(Struwwelpeter)                                                                            | 0.2845 | 1.9879 | 1 | 43.4570 | -0.3176 | -0.0365 |
| OJ1268_B08.2<br>0  | Hypothetical<br>Protein                               | At2g12210 | Transposable<br>Element Gene                                                                      | 0.5226 | 4.6327 | 1 | 49.8880 | 0.1534  | -0.0046 |
| OJ1276_B06.2<br>8  | Putative Alliinase                                    | At4g24670 | Alliinase Family<br>Protein                                                                       | 0.4082 | 3.9088 | 1 | 85.3750 | -0.5805 | -0.0705 |
| OJ1281_H05.8       | GTP<br>Cyclohydrolase                                 | At5g59750 | Riboflavin<br>Biosynthesis<br>Protein, Putative                                                   | 0.2806 | 2.1027 | 1 | 58.5460 | -0.3866 | -0.0155 |
| OJ1288_G09.1<br>5  | Putative<br>Trehalose-6-<br>Phosphate<br>Phosphatase  | At4g12430 | Trehalose-6-<br>Phosphate<br>Phosphatase,<br>Putative                                             | 0.4442 | 4.1137 | 1 | 85.5910 | -0.3194 | -0.0542 |
| OJ1294_F06.14      | Putative<br>Cytochrome<br>P450                        | At5g25120 | CYP71B11<br>(Cytochrome<br>P450, Family 71,<br>Subfamily B,<br>Polypeptide 11);<br>Oxygen Binding | 0.6537 | 3.0705 | 1 | 62.8850 | -0.5002 | -0.0324 |
| OJ1311_D08.2<br>7  | Putative Lysine-<br>Ketoglutarate                     | At4g33150 | Lkr (Saccharopine<br>Dehydrogenase)                                                               | 0.2280 | 1.5071 | 1 | 35.3490 | -0.0257 | -0.0877 |

|                 |                                                |           |                                                                                                    |        |        |   |         |         |         |
|-----------------|------------------------------------------------|-----------|----------------------------------------------------------------------------------------------------|--------|--------|---|---------|---------|---------|
| OJ1323_A06.27   | Putative Membrane Protein                      | At5g07250 | Rhomboid Family Protein                                                                            | 0.3022 | 1.9341 | 1 | 63.2590 | -0.4334 | -0.0706 |
| OJ1345_D02.3    | Pentatricopeptide (PPR) Repeat-Containing      | At2g44880 | Pentatricopeptide (PPR) Repeat-Containing Protein                                                  | 0.5234 | 1.9391 | 1 | 65.0990 | -0.3756 | -0.0571 |
| OJ1349_D05.131  | Putative Pentatricopeptide (PPR)               | At4g02750 | Pentatricopeptide (PPR) Repeat-Containing Protein                                                  | 0.5665 | 4.5518 | 1 | 58.6620 | -0.3938 | -0.0160 |
| OJ1349_D05.141  | Putative Pectinesterase                        | At4g12420 | SKU5 (Skewed 5); Copper Ion Binding                                                                | 0.3471 | 3.4316 | 1 | 63.9320 | -0.3653 | -0.0447 |
| OJ1365_D05.10   | Putative Response Regulator Protein(Receiver   | At3g04280 | Arr22 (Arabidopsis Response Regulator 22)                                                          | 0.6216 | 3.2661 | 1 | 89.1670 | -0.3563 | -0.1669 |
| OJ1369_G08.6    | Putative Polygalacturonase                     | At1g19170 | Glycoside Hydrolase Family 28 Protein / Polygalacturonase (Pectinase) Family Protein               | 0.2397 | 1.6398 | 1 | 44.0300 | -0.2695 | -0.0260 |
| OJ1435_F07.24-2 | Unknown Protein                                | At5g45560 | Pleckstrin Homology (PH) Domain-Containing Protein / Lipid-Binding START Domain-Containing Protein | 0.3638 | 3.9107 | 1 | 50.5660 | -0.0980 | -0.0447 |
| OJ1448_G06.11   | Putative DNA-3-Methyladenine Glycosylase       | At3g12040 | DNA-3-Methyladenine Glycosylase (MAG)                                                              | 0.3159 | 1.4716 | 1 | 64.3440 | -0.3615 | -0.0630 |
| OJ1457_D07.114  | GTP-Binding Protein Rab6                       | At2g44610 | RAB6; GTP Binding                                                                                  | 0.0637 | 1.7495 | 1 | 56.5660 | -0.4178 | -0.0740 |
| OJ1477_F01.112  | Putative Ferredoxin-Dependent Glutamate        | At5g04140 | Glu1 (Ferredoxin-Dependent Glutamate Synthase 1)                                                   | 0.1437 | 2.2264 | 1 | 38.0360 | 0.0281  | -0.0195 |
| OJ1477_F01.115  | Phosphatidylinositol-4-Phosphate 5-Kinase-Like | At3g56960 | Phosphatidylinositol-4-Phosphate 5-Kinase Family                                                   | 0.3262 | 4.6878 | 1 | 69.2210 | -0.4287 | -0.0271 |

|                     |                                             |           | Protein                                                                 |        |        |   |         |         |         |
|---------------------|---------------------------------------------|-----------|-------------------------------------------------------------------------|--------|--------|---|---------|---------|---------|
| OJ1479_B11.2<br>1   | Putative Ripening Regulated Protein DDTFR18 | At1g47530 | Ripening-Responsive Protein, Putative                                   | 0.3962 | 4.3996 | 1 | 93.6630 | -0.4529 | -0.0289 |
| OJ1486_E07.2<br>1   | Unknown Protein                             | At2g23940 | Unknown Protein                                                         | 0.2910 | 3.5644 | 1 | 49.6930 | -0.2119 | -0.0609 |
| OJ1489_G03.3        | Putative NAD-/NADP-Dependent Oxidoreductase | At1g54870 | Oxidoreductase                                                          | 0.2297 | 3.9315 | 1 | 91.3790 | -0.4119 | -0.0282 |
| OJ1489_G03.7        | Unknown Protein                             | At4g15520 | Trna/Rna Methyltransferase (Spou) Family Protein                        | 0.2793 | 1.7035 | 1 | 68.5990 | -0.1788 | -0.0634 |
| OJ1493_H11.1<br>9-1 | Putative Inner Membrane                     | At1g17530 | ATTIM23-1; Protein Translocase                                          | 0.6001 | 3.7629 | 1 | 92.0630 | -0.4373 | -0.0714 |
| OJ1513_F02.12<br>3  | Pentatricopeptide (PPR) Repeat-Containing   | At4g37380 | Pentatricopeptide (PPR) Repeat-Containing Protein                       | 0.4436 | 4.6032 | 1 | 81.6830 | -0.5107 | -0.0194 |
| OJ1521_G02.9        | Putative Resistance Gene Analog PIC27       | At3g50950 | Disease Resistance Protein (CC-NBS-LRR Class), Putative                 | 0.8723 | 4.3586 | 1 | 49.6630 | 0.0424  | -0.0393 |
| OJ1524_D08.1<br>6   | Putative Exopolygalacturonase Precursor     | At3g14040 | Exopolygalacturonase / Galacturan 1,4-Alpha-Galacturonidase / Pectinase | 0.5913 | 4.2645 | 1 | 96.3860 | -0.3964 | -0.0581 |
| OJ1524_D08.1<br>8   | Putative 3-Oxoacyl Carrier Protein Synthase | At2g04540 | 3-Oxoacyl-(Acyl-Carrier-Protein) Synthase II, Putative                  | 0.1710 | 1.7783 | 1 | 34.8210 | 0.2210  | -0.0668 |
| OJ1540_G08.3<br>0   | Putative SKP1 Interacting Partner 1         | At5g57900 | Skip1 (Skp1 Interacting Partner 1)                                      | 0.4891 | 4.0102 | 1 | 68.3670 | -0.2873 | -0.0462 |
| OJ1540_H01.1<br>0   | Putative Receptor Protein Kinase            | At1g75820 | CLV1 (CLAVATA 1); ATP Binding / Kinase/ Protein Serine/Threonine Kinase | 0.3722 | 4.8224 | 1 | 93.7960 | -0.4107 | -0.0005 |
| OJ1562_B11.1        | Unknown Protein                             | At5g19850 | Hydrolase,                                                              | 0.1777 | 1.5836 | 1 | 38.6500 | -0.0719 | -0.0707 |



|                    |                                             |           |                                                                                                             |        |        |   |         |         |         |
|--------------------|---------------------------------------------|-----------|-------------------------------------------------------------------------------------------------------------|--------|--------|---|---------|---------|---------|
| 04                 |                                             |           | Alpha/Beta Fold Family Protein                                                                              |        |        |   |         |         |         |
| OJ1568_B05.2<br>1  | NBS-LRR Disease Resistance Protein-Like     | At1g58400 | Disease Resistance Protein (CC-NBS-LRR Class), Putative                                                     | 1.0865 | 3.2697 | 1 | 73.2140 | -0.3947 | -0.1567 |
| OJ1568_B05.2<br>6  | Ubiquitin-Like Protein                      | At5g40630 | Ubiquitin Family Protein                                                                                    | 0.5315 | 3.4548 | 1 | 81.6460 | -0.4887 | -0.0929 |
| OJ1568_B05.8       | Putative Cytochrome P450                    | At5g63450 | CYP94B1 (Cytochrome P450, Family 94, Subfamily B, Polypeptide 1); Oxygen Binding                            | 0.6434 | 4.0769 | 1 | 96.5240 | -0.3983 | -0.0449 |
| OJ1572_F02.9       | Putative Ankyrin Repeat-Containing Protein  | At5g20350 | Tip1 (Tip Growth Defective 1)                                                                               | 0.2618 | 4.5170 | 1 | 42.2150 | 0.1878  | -0.0312 |
| OJ1575_B01.2<br>1  | Putative Cyclic Nucleotide-Gated            | At3g48010 | ATCNGC16 (Cyclic Nucleotide Gated Channel 16); Calmodulin Binding / Cyclic Nucleotide Binding / Ion Channel | 0.5364 | 2.7486 | 1 | 44.1500 | 0.2959  | -0.0153 |
| OJ1606_D04.1<br>14 | Putative Protein Kinase Xa21, Receptor Type | At1g35710 | Leucine-Rich Repeat Transmembrane Protein Kinase, Putative                                                  | 0.8169 | 4.2544 | 1 | 47.6320 | -0.1201 | -0.0138 |
| OJ1607A12.7        | Hypothetical Protein                        | At3g23020 | Pentatricopeptide (PPR) Repeat-Containing Protein                                                           | 0.4425 | 2.4970 | 1 | 47.2220 | -0.1058 | -0.0117 |
| OJ1653_D06.5       | Putative Phosphoribosylglycinamide          | At1g31220 | Phosphoribosylglycinamide Formyltransferase                                                                 | 0.2518 | 1.6877 | 1 | 47.3210 | -0.1996 | -0.0744 |
| OJ1655_B12.2<br>0  | Putative Nuclear Protein P30                | At5g16940 | Carbon-Sulfur Lyase                                                                                         | 0.3126 | 3.3507 | 1 | 98.6300 | -0.4119 | -0.1510 |
| OJ1656_A11.6       | Similar To Root Cap Protein                 | At5g54370 | Late Embryogenesis Abundant Protein-Related / LEA Protein-Related                                           | 0.6601 | 3.8467 | 1 | 94.3570 | -0.5042 | -0.0840 |

|                 |                                                |           |                                                                                                   |        |        |   |         |         |         |
|-----------------|------------------------------------------------|-----------|---------------------------------------------------------------------------------------------------|--------|--------|---|---------|---------|---------|
| OJ1657_H11.2    | Putative Inosine-Uridine Preferring Nucleoside | At5g18860 | Inosine-Uridine Preferring Nucleoside Hydrolase Family Protein                                    | 0.3381 | 4.8087 | 1 | 37.6580 | 0.0359  | -0.0209 |
| OJ1695_H09.19   | Putative DEAD Box-Like RNA Helicase            | At4g15850 | ATRH1 (Arabidopsis Thaliana RNA Helicase 1); ATP-Dependent Helicase                               | 0.3381 | 4.3361 | 1 | 40.5800 | 0.0002  | -0.0435 |
| OJ1699_E05.34   | Unknown Protein                                | At5g55170 | Sum3 (Small Ubiquitin-Like Modifier 3)                                                            | 0.6035 | 3.0180 | 1 | 90.0990 | -0.4648 | -0.1127 |
| OJ1705B08.11    | Putative CAF Protein                           | At1g01040 | DCL1 (DICER-LIKE1); ATP-Dependent Helicase/Ribonuclease III                                       | 0.2175 | 3.1559 | 1 | 44.0230 | -0.1051 | -0.0067 |
| OJ1717_A09.30   | Putative Ring Finger Protein                   | At1g20823 | Zinc Finger (C3HC4-Type RING Finger) Family Protein                                               | 0.5166 | 3.6417 | 1 | 94.9440 | -0.3339 | -0.0926 |
| OJ1723_B06.130  | Unknown Protein                                | At5g39650 | Unknown Protein                                                                                   | 0.7961 | 3.9040 | 1 | 89.6550 | -0.4060 | -0.0576 |
| OJ1725_H08.12-2 | Mechanosensitive Ion Channel Domain-Containing | At1g53470 | Mechanosensitive Ion Channel Domain-Containing Protein / MS Ion Channel Domain-Containing Protein | 0.4456 | 3.7614 | 1 | 64.6460 | -0.4257 | -0.0766 |
| OJ1729_E01.2    | Putative Serine/Threonine Kinase -Related      | At4g05200 | Protein Kinase Family Protein                                                                     | 0.6335 | 2.0929 | 1 | 69.4270 | -0.4017 | -0.0330 |
| OJ1734_E02.41   | Putative Atpase                                | At5g60730 | Anion-Transporting Atpase Family Protein                                                          | 0.3659 | 2.8799 | 1 | 57.6720 | 0.1217  | -0.0638 |
| OJ1734_E04.23   | Unknown Protein                                | At1g25510 | Aspartyl Protease Family Protein                                                                  | 1.0119 | 2.4530 | 1 | 56.1980 | -0.1851 | -0.1240 |
| OJ1743_B12.18   | Putative Cell Division Control Protein CDC91   | At1g12730 | Cell Division Cycle Protein-Related                                                               | 0.3751 | 1.7188 | 1 | 43.7920 | 0.2310  | -0.0669 |
| OJ1743_B12.3    | Putative                                       | At1g49780 | U-Box Domain-                                                                                     | 0.8957 | 4.2571 | 1 | 94.6970 | -0.3841 | -0.0315 |

|                |                                             |           |                                                            |        |        |   |         |         |         |
|----------------|---------------------------------------------|-----------|------------------------------------------------------------|--------|--------|---|---------|---------|---------|
| 9              | Immediate-Early Fungal Elicitor Protein     |           | Containing Protein                                         |        |        |   |         |         |         |
| OJ1743A09.2    | Putative Homocysteine S-Methyltransferase-1 | At3g25900 | ATHMT-1/HMT-1; Homocysteine S-Methyltransferase            | 0.2844 | 1.8052 | 1 | 73.6840 | -0.2464 | -0.0641 |
| OJ1754_E06.32  | Hypothetical Protein                        | At1g08070 | Pentatricopeptide (PPR) Repeat-Containing Protein          | 0.5705 | 4.5878 | 1 | 62.8320 | -0.5144 | -0.0316 |
| OJ1756_H07.55  | Putative Pentatricopeptide (PPR)            | At5g08490 | Pentatricopeptide (PPR) Repeat-Containing Protein          | 0.5142 | 4.0506 | 1 | 49.0440 | -0.2007 | -0.0117 |
| OJ1770_H02.15  | PIN1-Like Auxin Transport Protein-Like      | At5g15100 | PIN8 (PIN-FORMED 8); Auxin:Hydrogen Symporter/Transporter  | 0.6674 | 2.6612 | 1 | 90.1370 | -0.3793 | -0.0349 |
| OJ1770_H02.17  | Putative Proteasome Subunit Beta Type 1     | At3g60820 | PBF1 (20S Proteasome Beta Subunit F1); Peptidase           | 0.1982 | 3.7712 | 1 | 54.2860 | -0.1324 | -0.0849 |
| OJ1773_H01.113 | Putative Lysophospholipase Homolog          | At1g11090 | Hydrolase, Alpha/Beta Fold Family Protein                  | 0.3428 | 3.9650 | 1 | 93.9100 | -0.4392 | -0.0731 |
| OJ1791_B03.38  | Putative Pentatricopeptide (PPR)            | At3g04130 | Binding                                                    | 0.4250 | 4.2533 | 1 | 48.7180 | -0.1804 | -0.0282 |
| OJ9003_G05.12  | Putative Serine/Threonine Kinase            | At5g07070 | CIPK2 (CBL-INTERACTING PROTEIN KINASE 2); Kinase           | 0.2726 | 4.2267 | 1 | 40.1750 | -0.0047 | -0.0122 |
| OJ991113_30.18 | Unknown Protein                             | At1g06710 | Pentatricopeptide (PPR) Repeat-Containing Protein          | 0.3381 | 4.5832 | 1 | 39.7990 | -0.0179 | -0.0196 |
| OJ991113_30.3  | Unknown Protein                             | At1g67600 | Unknown Protein                                            | 0.2973 | 1.8419 | 1 | 48.6300 | -0.0672 | -0.1582 |
| OJ991113_30.7  | Unknown Protein                             | At1g27190 | Leucine-Rich Repeat Transmembrane Protein Kinase, Putative | 0.4390 | 4.5450 | 1 | 77.9460 | -0.4370 | -0.0146 |
| OSJNBa0001K    | Putative Alcohol                            | At4g19380 | Alcohol Oxidase-                                           | 0.5666 | 4.5962 | 1 | 94.7220 | -0.3846 | -0.0295 |

|                      |                                               |           |                                                                                  |        |        |   |         |         |         |
|----------------------|-----------------------------------------------|-----------|----------------------------------------------------------------------------------|--------|--------|---|---------|---------|---------|
| 12.13                | Oxidase                                       |           | Related                                                                          |        |        |   |         |         |         |
| OSJNBa0001K<br>12.5  | Putative Alcohol Oxidase                      | At3g23410 | Alcohol Oxidase-Related                                                          | 0.4706 | 4.5977 | 1 | 93.0000 | -0.3708 | -0.0251 |
| OSJNBa0001O<br>14.15 | Hypothetical Protein                          | At5g04480 | Unknown Protein                                                                  | 0.5140 | 2.3705 | 1 | 45.3490 | -0.2114 | -0.0244 |
| OSJNBa0002I0<br>3.18 | Putative Inositol Polyphosphate 5-Phosphatase | At1g47510 | Endonuclease/Exonuclease/Phosphatase Family Protein                              | 0.3978 | 4.0467 | 1 | 45.1100 | 0.0627  | -0.0429 |
| OSJNBa0002I0<br>3.19 | Putative LIM Domain Containing Protein        | At5g17890 | LIM Domain-Containing Protein / Disease Resistance Protein-Related               | 0.5406 | 4.3180 | 1 | 35.8370 | 0.1783  | -0.0152 |
| OSJNBa0004A<br>10.16 | Putative RNA-Binding Protein                  | At1g74230 | GR-RBP5 (Glycine-Rich RNA-Binding Protein 5); RNA Binding                        | 0.4243 | 2.4649 | 1 | 62.6090 | -0.4815 | -0.2008 |
| OSJNBa0004B<br>24.15 | Putative Cytochrome P450 <sub>tyr</sub>       | At2g22330 | CYP79B3 (Cytochrome P450, Family 79, Subfamily B, Polypeptide 3); Oxygen Binding | 0.4687 | 4.4092 | 1 | 93.5040 | -0.4219 | -0.0339 |
| OSJNBa0004B<br>24.22 | Putative Membrane-Associated Salt-Inducible   | At5g08310 | Pentatricopeptide (PPR) Repeat-Containing Protein                                | 1.1074 | 4.7190 | 1 | 59.1410 | -0.4854 | -0.0251 |
| OSJNBa0004E<br>08.12 | Putative Receptor-Like Protein Kinase         | At1g17750 | Leucine-Rich Repeat Transmembrane Protein Kinase, Putative                       | 0.7296 | 5.0219 | 1 | 62.4320 | -0.2983 | -0.0048 |
| OSJNBa0005K<br>07.3  | Putative Kinase                               | At2g46700 | Calcium-Dependent Protein Kinase, Putative / CDPK, Putative                      | 0.2535 | 4.5567 | 1 | 57.9930 | -0.0869 | -0.0123 |
| OSJNBa0005K<br>07.4  | Putative Serine Peptidase                     | At4g36190 | Serine Carboxypeptidase S28 Family Protein                                       | 0.2823 | 2.5962 | 1 | 38.5210 | 0.1886  | -0.0255 |
| OSJNBa0006A<br>01.11 | Unknown Protein                               | At5g01120 | Unknown Protein                                                                  | 0.8548 | 1.9570 | 1 | 57.3770 | -0.5178 | -0.0326 |
| OSJNBa0006B          | Unknown Protein                               | At3g26540 | Pentatricopeptide                                                                | 0.5991 | 2.5949 | 1 | 57.6700 | -0.4754 | -0.0282 |

|                  |                                                |           |                                                                                    |        |        |   |         |         |         |
|------------------|------------------------------------------------|-----------|------------------------------------------------------------------------------------|--------|--------|---|---------|---------|---------|
| 20.8             |                                                |           | (PPR) Repeat-Containing Protein                                                    |        |        |   |         |         |         |
| OSJNBa0006O15.16 | Putative Lecithin-Cholesterol Acyl Transferase | At1g27480 | Lecithin:Cholesterol Acyltransferase Family Protein / LACT Family Protein          | 0.6352 | 1.5751 | 1 | 62.6300 | -0.1989 | -0.0490 |
| OSJNBa0009L15.1  | Unknown Protein                                | At5g41880 | DNA Primase Small Subunit Family                                                   | 0.3158 | 2.5223 | 1 | 36.7740 | -0.0541 | -0.0536 |
| OSJNBa0010D21.3  | Unknown Protein                                | At1g74180 | Leucine-Rich Repeat Family Protein                                                 | 0.8845 | 4.7964 | 1 | 45.8700 | 0.3081  | -0.0180 |
| OSJNBa0010E04.19 | Putative Ion Antiporter                        | At3g17630 | ATCHX19 (CATION/H+ EXCHANGER 19); Monovalent Cation:Proton Antiporter              | 0.3302 | 4.8153 | 1 | 93.5830 | -0.3694 | -0.0259 |
| OSJNBa0013A09.12 | Expressed Protein                              | At1g69450 | Unknown Protein                                                                    | 0.6359 | 2.0630 | 1 | 50.2110 | -0.1278 | -0.0145 |
| OSJNBa0013M12.21 | Hypothetical Protein                           | At5g61190 | Zinc Finger Protein-Related                                                        | 0.4629 | 3.7143 | 1 | 77.6540 | -0.3950 | -0.0922 |
| OSJNBa0013M12.7  | Putative Cytochrome P450-Related Protein       | At2g46950 | CYP709B2 (Cytochrome P450, Family 709, Subfamily B, Polypeptide 2); Oxygen Binding | 0.4676 | 3.2371 | 1 | 58.9800 | 0.1779  | -0.0571 |
| OSJNBa0014M17.24 | Putative Immediate-Early Fungal Elicitor       | At3g52450 | U-Box Domain-Containing Protein                                                    | 0.5345 | 4.2818 | 1 | 96.3500 | -0.3672 | -0.0550 |
| OSJNBa0015J15.13 | Putative Lipid Transfer Protein                | At4g12490 | Protease Inhibitor/Seed Storage/Lipid Transfer Protein (LTP) Family Protein        | 0.3941 | 3.4583 | 1 | 87.6920 | -0.4850 | -0.0374 |
| OSJNBa0016I09.14 | Hypothetical Protein                           | At5g64700 | Nodulin Mtn21 Family Protein                                                       | 0.5239 | 4.2198 | 1 | 86.0270 | -0.3873 | -0.0423 |
| OSJNBa0016I09.29 | Putative 14-3-3-Like Protein                   | At1g26480 | GRF12 (GENERAL REGULATORY FACTOR 12); Protein                                      | 0.3012 | 2.8247 | 1 | 43.6360 | -0.3365 | -0.0314 |

|                    |                                               |           |                                                                                        |        |        |   |         |         |         |
|--------------------|-----------------------------------------------|-----------|----------------------------------------------------------------------------------------|--------|--------|---|---------|---------|---------|
|                    |                                               |           | Phosphorylated Amino Acid Binding                                                      |        |        |   |         |         |         |
| OSJNBa0016N 23.106 | Putative Beta-Glucosidase Isozyme 2 Precursor | At2g44480 | Glycosyl Hydrolase Family 1 Protein                                                    | 0.4790 | 4.4086 | 1 | 80.3350 | -0.4689 | -0.0178 |
| OSJNBa0017E 08.18  | Putative Membrane-Associated Protein          | At1g12700 | Helicase Domain-Containing Protein / Pentatricopeptide (PPR) Repeat-Containing Protein | 1.0185 | 2.4323 | 1 | 48.7270 | -0.2952 | -0.0372 |
| OSJNBa0018M 05.13  | Unknown Protein                               | At3g18620 | Zinc Finger (DHHC Type) Family Protein                                                 | 0.4612 | 2.0798 | 1 | 37.3210 | 0.1433  | -0.0592 |
| OSJNBa0018M 05.16  | Unknown Protein                               | At1g48930 | Endo-1,4-Beta-Glucanase, Putative / Cellulase, Putative                                | 0.3619 | 4.4959 | 1 | 96.3270 | -0.4378 | -0.0243 |
| OSJNBa0018M 05.21  | Unknown Protein                               | At1g63070 | Pentatricopeptide (PPR) Repeat-Containing Protein                                      | 1.0321 | 2.5115 | 1 | 68.3210 | -0.4566 | -0.0454 |
| OSJNBa0018M 05.8   | Unknown Protein                               | At3g17670 | Binding                                                                                | 0.6471 | 2.1730 | 1 | 70.0850 | -0.4411 | -0.0648 |
| OSJNBa0019G 23.8   | Unknown Protein                               | At3g08980 | Signal Peptidase I Family Protein                                                      | 0.5189 | 2.5753 | 1 | 77.9870 | -0.2808 | -0.1134 |
| OSJNBa0022H 21.21  | Unknown Protein                               | At5g50170 | C2 Domain-Containing Protein / GRAM Domain-Containing Protein                          | 0.4879 | 2.6491 | 1 | 54.5740 | -0.1370 | -0.0181 |
| OSJNBa0023I 3.30   | Unknown Protein                               | At1g16080 | Unknown Protein                                                                        | 0.2685 | 3.5275 | 1 | 42.8570 | 0.1912  | -0.0965 |
| OSJNBa0023I 7.4    | Putative Pentatricopeptide (PPR)              | At2g36730 | Pentatricopeptide (PPR) Repeat-Containing Protein                                      | 0.7495 | 2.7397 | 1 | 61.1480 | -0.5280 | -0.0712 |
| OSJNBa0023I 9.10   | Putative Purple Acid Phosphatase              | At1g14700 | ATPAP3/PAP3 (Purple Acid Phosphatase 3)                                                | 0.3991 | 4.9680 | 1 | 63.4070 | -0.3374 | -0.0525 |
| OSJNBa0024K        | Expressed                                     | At5g17830 | Unknown Protein                                                                        | 0.9748 | 2.2696 | 1 | 47.6790 | -0.2611 | -0.0449 |

|                      |                                           |           |                                                                                                     |        |        |   |         |         |         |
|----------------------|-------------------------------------------|-----------|-----------------------------------------------------------------------------------------------------|--------|--------|---|---------|---------|---------|
| 17.17                | Protein                                   |           |                                                                                                     |        |        |   |         |         |         |
| OSJNBa0026E<br>05.30 | Putative Calcium Exchanger (CAX2)         | At1g55730 | ATCAX5 (Calcium Exchanger 5); Cation:Cation Antiporter                                              | 0.3156 | 1.7627 | 1 | 40.9300 | 0.2624  | -0.0251 |
| OSJNBa0027G<br>07.7  | Unknown Protein                           | At1g34580 | Monosaccharide Transporter, Putative                                                                | 0.4320 | 4.3328 | 1 | 96.0180 | -0.4322 | -0.0363 |
| OSJNBa0027H<br>06.5  | Unknown Protein                           | At3g14540 | Terpene Synthase/Cyclase Family Protein                                                             | 0.9352 | 2.6798 | 1 | 55.6770 | -0.1002 | -0.0237 |
| OSJNBa0027L<br>23.3  | Putative Plastid-Lipid Associated Protein | At2g35490 | Plastid-Lipid Associated Protein PAP, Putative                                                      | 0.4234 | 4.2449 | 1 | 67.6220 | -0.4922 | -0.0152 |
| OSJNBa0027P<br>08.8  | Unknown Protein                           | At3g02850 | SKOR (Stelar K+ Outward Rectifier); Cyclic Nucleotide Binding / Outward Rectifier Potassium Channel | 0.3619 | 3.4666 | 1 | 73.8620 | -0.3228 | -0.0192 |
| OSJNBa0028I2<br>3.24 | Unknown Protein                           | At5g45370 | Nodulin-Related / Integral Membrane Family Protein                                                  | 0.9059 | 2.9090 | 1 | 66.0380 | -0.2744 | -0.0403 |
| OSJNBa0029H<br>02.19 | Unknown Protein                           | At2g24240 | Potassium Channel Tetramerisation Domain-Containing Protein                                         | 0.2504 | 4.2656 | 1 | 94.9770 | -0.4297 | -0.0308 |
| OSJNBa0032F<br>06.13 | Unknown Protein                           | At3g59950 | Autophagy 4b (APG4b)                                                                                | 0.4308 | 2.4290 | 1 | 45.1540 | -0.0120 | -0.0305 |
| OSJNBa0032G<br>08.1  | Putative Dihydroflavonal-4-Reductase      | At4g33360 | Terpene Cyclase/Mutase-Related                                                                      | 0.3037 | 2.8546 | 1 | 62.3050 | -0.1539 | -0.0604 |
| OSJNBa0032H<br>19.14 | Unknown Protein                           | At2g05640 | Transposable Element Gene                                                                           | 0.5249 | 3.3394 | 1 | 42.9750 | -0.2012 | -0.0764 |
| OSJNBa0032I1<br>9.1  | Unknown Protein                           | At1g10810 | Aldo/Keto Reductase Family Protein                                                                  | 0.3117 | 4.1613 | 1 | 65.6980 | -0.5646 | -0.0701 |
| OSJNBa0033G<br>16.6  | Unknown Protein                           | At3g11680 | Unknown Protein                                                                                     | 0.5122 | 2.9992 | 1 | 70.6290 | -0.2939 | -0.0631 |
| OSJNBa0033P          | Putative DNA                              | At3g23240 | ATERF1/ERF1                                                                                         | 0.4575 | 3.4441 | 1 | 84.2110 | -0.2080 | -0.0687 |

|                  |                             |           |                                                                                                       |        |        |   |         |         |         |
|------------------|-----------------------------|-----------|-------------------------------------------------------------------------------------------------------|--------|--------|---|---------|---------|---------|
| 04.20            | Binding Protein             |           | (ETHYLENE RESPONSE FACTOR 1); DNA Binding / Transcription Factor/ Transcriptional Activator           |        |        |   |         |         |         |
| OSJNBa0034B05.21 | Putative Protein Kinase     | At1g50700 | CPK33 (Calcium-Dependent Protein Kinase 33); Calcium- And Calmodulin-Dependent Protein Kinase/ Kinase | 0.9411 | 4.0384 | 1 | 91.4750 | -0.4678 | -0.0684 |
| OSJNBa0035H01.10 | Putative Cellulose Synthase | At3g03050 | CSLD3 (CELLULOSE SYNTHASE-LIKE 3); Cellulose Synthase/ Transferase, Transferring Glycosyl Groups      | 0.1635 | 4.9102 | 1 | 94.0410 | -0.4590 | -0.0192 |
| OSJNBa0035I24.3  | Expressed Protein           | At4g33700 | CBS Domain-Containing Protein                                                                         | 0.2005 | 3.0946 | 1 | 47.1790 | -0.2046 | -0.0569 |
| OSJNBa0035M09.18 | Unknown Protein             | At4g25870 | Unknown Protein                                                                                       | 0.3533 | 1.7291 | 1 | 41.2090 | 0.1918  | -0.0230 |
| OSJNBa0038P21.6  | Unknown Protein             | At1g62670 | Pentatricopeptide (PPR) Repeat-Containing Protein                                                     | 0.8685 | 2.4030 | 1 | 46.2050 | -0.0405 | -0.0279 |
| OSJNBa0039K24.10 | Unknown Protein             | At5g14130 | Peroxidase, Putative                                                                                  | 0.7242 | 4.0791 | 1 | 85.0610 | -0.3939 | -0.0704 |
| OSJNBa0039N21.16 | Putative Transposon Protein | At1g34660 | Transposable Element Gene                                                                             | 0.6798 | 4.2344 | 1 | 53.8810 | -0.1939 | -0.0294 |
| OSJNBa0041A02.25 | Unknown Protein             | At5g57550 | XTR3 (XYLOGLUCAN ENDOTRANSGLYCOSYLASE 3); Hydrolase, Acting On Glycosyl Bonds                         | 0.4292 | 3.8662 | 1 | 85.4610 | -0.4835 | -0.0724 |
| OSJNBa0042E      | Putative                    | At3g04260 | PTAC3 (PLASTID                                                                                        | 0.2771 | 3.5519 | 1 | 44.7490 | -0.0644 | -0.0048 |



|                  |                                       |           |                                                                                                              |        |        |   |         |         |         |
|------------------|---------------------------------------|-----------|--------------------------------------------------------------------------------------------------------------|--------|--------|---|---------|---------|---------|
| 19.39            | Chloroplast RNA Processing Protein    |           | TRANSCRIPTIONALLY ACTIVE3); DNA Binding                                                                      |        |        |   |         |         |         |
| OSJNBa0042H09.16 | Hypothetical Protein                  | At2g45010 | Unknown Protein                                                                                              | 0.3243 | 2.5099 | 1 | 59.9080 | -0.1426 | -0.0953 |
| OSJNBa0042I15.19 | Unknown Protein                       | At5g22510 | Beta-Fructofuranosidase, Putative / Invertase, Putative / Saccharase, Putative / Beta-Fructosidase, Putative | 0.2412 | 4.4881 | 1 | 57.9040 | -0.2914 | -0.0456 |
| OSJNBa0042L16.16 | Unknown Protein                       | At1g49740 | Phospholipase C                                                                                              | 0.3360 | 4.1600 | 1 | 88.6930 | -0.3997 | -0.0559 |
| OSJNBa0042P21.23 | Putative Protein Kinase               | At1g70520 | Protein Kinase Family Protein                                                                                | 0.5403 | 3.4570 | 1 | 63.1080 | -0.3361 | -0.0308 |
| OSJNBa0042P21.27 | Putative Polygalacturonase            | At3g26610 | Polygalacturonase, Putative / Pectinase, Putative                                                            | 0.4248 | 4.3027 | 1 | 75.7720 | -0.2266 | -0.0664 |
| OSJNBa0043A12.38 | Unknown Protein                       | At2g37250 | ADK/ATPADK1 (ADENOSINE KINASE); Nucleotide Kinase                                                            | 0.3151 | 2.7593 | 1 | 59.4590 | -0.2424 | -0.0902 |
| OSJNBa0043L24.4  | Unknown Protein                       | At3g24320 | CHM (CHLOROPLAST MUTATOR); ATP Binding / Damaged DNA Binding                                                 | 0.2514 | 2.9448 | 1 | 34.3070 | 0.2853  | -0.0056 |
| OSJNBa0045O17.6  | Unknown Protein                       | At3g29732 | Transposable Element Gene                                                                                    | 0.7684 | 4.7600 | 1 | 52.7810 | 0.0399  | -0.0153 |
| OSJNBa0047A17.6  | Putative Copine III                   | At5g07300 | Bon2 (Bonzai 2)                                                                                              | 0.3213 | 1.6959 | 1 | 43.1190 | 0.0423  | -0.0527 |
| OSJNBa0050F10.4  | Putative Polynucleotide Phosphorylase | At3g03710 | RIF10 (RESISTANT TO INHIBITION WITH FSM 10); 3'-5'-Exoribonuclease/ RNA Binding / Nucleic Acid Binding       | 0.2605 | 3.0016 | 1 | 39.0630 | 0.0144  | -0.0127 |
| OSJNBa0050F10.40 | Galactose-1-Phosphate                 | At5g18200 | UDP-Glucose:Hexose-                                                                                          | 0.2954 | 3.6541 | 1 | 47.8020 | -0.0743 | -0.0764 |

|                    |                                        |           |                                                                                                                                                |        |        |   |         |         |         |
|--------------------|----------------------------------------|-----------|------------------------------------------------------------------------------------------------------------------------------------------------|--------|--------|---|---------|---------|---------|
|                    | Uridyltransferase-Like                 |           | 1-Phosphate Uridyltransferase                                                                                                                  |        |        |   |         |         |         |
| OSJNBa0050H14.4    | Hypothetical Protein                   | At1g72620 | Hydrolase, Alpha/Beta Fold Family Protein                                                                                                      | 0.8940 | 3.9953 | 1 | 83.2240 | -0.3573 | -0.0524 |
| OSJNBa0050N08.17   | Putative Selenium-Binding Protein-Like | At2g22410 | Pentatricopeptide (PPR) Repeat-Containing Protein                                                                                              | 0.5227 | 2.7798 | 1 | 62.4800 | -0.2300 | -0.0065 |
| OSJNBa0052K15.13-1 | Putative Cyclic Nucleotide-Gated       | At5g53130 | CNGC1 (CYCLIC NUCLEOTIDE GATED CHANNEL 1); Calmodulin Binding / Cation Channel/ Cyclic Nucleotide Binding / Inward Rectifier Potassium Channel | 0.2975 | 4.3827 | 1 | 32.5990 | 0.2101  | -0.0263 |
| OSJNBa0052O12.10   | Putative Serine Palmitoyltransferase   | At5g23670 | LCB2 (Serine Palmitoyltransferase LCB2 (Long Chain Base) Subunit Gene); Serine C-Palmitoyltransferase                                          | 0.1522 | 2.5451 | 1 | 46.9080 | -0.0669 | -0.0370 |
| OSJNBa0053B21.10   | Unknown Protein                        | At1g36590 | Transposable Element Gene                                                                                                                      | 0.7337 | 4.4955 | 1 | 61.5110 | -0.3045 | -0.0284 |
| OSJNBa0053C23.23   | Hypothetical Protein                   | At5g52810 | Ornithine Cyclodeaminase/ Mu-Crystallin Family Protein                                                                                         | 0.5023 | 4.1148 | 1 | 94.0990 | -0.4007 | -0.0836 |
| OSJNBa0053D03.12   | Putative Flavonoid 3'-Hydroxylase      | At5g07990 | TT7 (TRANSPARENT TESTA 7); Flavonoid 3'-Monooxygenase/ Oxygen Binding                                                                          | 0.3625 | 2.5334 | 1 | 82.2000 | -0.4948 | -0.0314 |
| OSJNBa0054K20.13   | RING Zinc Finger Protein-Like          | At4g32600 | Zinc Finger (C3HC4-Type RING Finger) Family Protein                                                                                            | 0.2349 | 2.9670 | 1 | 38.8300 | 0.0926  | -0.0437 |

|                      |                                                    |           |                                                                                                                             |        |        |   |         |         |         |
|----------------------|----------------------------------------------------|-----------|-----------------------------------------------------------------------------------------------------------------------------|--------|--------|---|---------|---------|---------|
| OSJNBa0054K<br>20.23 | Unknown Protein                                    | At3g09250 | DNA Binding /<br>Nuclease                                                                                                   | 0.4344 | 3.8104 | 1 | 65.8990 | -0.3093 | -0.1087 |
| OSJNBa0056A<br>15.4  | Putative<br>Receptor-Like<br>Protein Kinase        | At4g00960 | Protein Kinase<br>Family Protein                                                                                            | 0.6955 | 3.9823 | 1 | 35.4230 | 0.4354  | -0.0283 |
| OSJNBa0056E<br>06.4  | Expressed<br>Protein                               | At1g79120 | Unknown Protein                                                                                                             | 0.2978 | 4.0349 | 1 | 45.5090 | -0.0938 | -0.0306 |
| OSJNBa0056E<br>06.9  | Expressed<br>Protein                               | At1g31300 | Unknown Protein                                                                                                             | 0.2765 | 1.5160 | 1 | 52.4900 | -0.0857 | -0.0451 |
| OSJNBa0057L<br>21.15 | Hypothetical<br>Protein                            | At5g46920 | Intron Maturase,<br>Type II Family<br>Protein                                                                               | 0.3247 | 4.6750 | 1 | 69.6280 | -0.3306 | -0.0105 |
| OSJNBa0057L<br>21.19 | Putative<br>Peroxidase                             | At5g17820 | Peroxidase 57<br>(PER57) (P57)<br>(PRXR10)                                                                                  | 0.5431 | 3.9463 | 1 | 94.6270 | -0.4498 | -0.0735 |
| OSJNBa0058E<br>19.16 | Putative Disease<br>Resistance<br>Protein          | At2g25790 | Leucine-Rich<br>Repeat<br>Transmembrane<br>Protein Kinase,<br>Putative                                                      | 0.7563 | 4.1433 | 1 | 57.1030 | 0.0756  | -0.0261 |
| OSJNBa0059G<br>06.4  | Putative Mate<br>Efflux Family<br>Protein          | At4g22790 | MATE Efflux<br>Family Protein                                                                                               | 0.4710 | 4.4554 | 1 | 93.1180 | -0.3857 | -0.0491 |
| OSJNBa0059G<br>06.5  | Unknown Protein                                    | At3g60810 | Unknown Protein                                                                                                             | 0.3326 | 3.7342 | 1 | 60.7840 | -0.3182 | -0.0798 |
| OSJNBa0060A<br>14.12 | Putative<br>Glucosyltransfer<br>ase                | At5g03760 | ATCSLA09<br>(RESISTANT TO<br>AGROBACTERIU<br>M<br>TRANSFORMATI<br>ON 4);<br>Transferase,<br>Transferring<br>Glycosyl Groups | 0.3193 | 2.5831 | 1 | 53.0170 | -0.1821 | -0.0334 |
| OSJNBa0060G<br>17.3  | Hypothetical<br>Protein                            | At5g07790 | Unknown Protein                                                                                                             | 1.1964 | 3.4170 | 1 | 56.5890 | -0.1391 | -0.0907 |
| OSJNBa0060K<br>08.15 | Putative<br>Molybdenum<br>Cofactor<br>Biosynthesis | At2g31950 | Molybdopterin<br>Synthase (CNX2)                                                                                            | 0.1204 | 3.9982 | 1 | 46.1130 | -0.2152 | -0.0519 |
| OSJNBa0060M<br>17.1  | Putative<br>Polygalacturonas<br>e                  | At3g57510 | ADPG1 (Endo-<br>Polygalacturonas<br>e 1);<br>Polygalacturonas<br>e                                                          | 0.5250 | 2.5159 | 1 | 75.3490 | -0.2493 | -0.0484 |
| OSJNBa0060N          | Unknown Protein                                    | At5g20810 | Calmodulin                                                                                                                  | 0.6531 | 3.4401 | 1 | 95.0920 | -0.4535 | -0.0858 |

|                      |                                                 |           |                                                                                                                           |        |        |   |         |         |         |
|----------------------|-------------------------------------------------|-----------|---------------------------------------------------------------------------------------------------------------------------|--------|--------|---|---------|---------|---------|
| 03.10                |                                                 |           | Binding                                                                                                                   |        |        |   |         |         |         |
| OSJNBa0061E<br>21.13 | Putative<br>Phosphatidylinositol<br>3-Kinase    | At1g60490 | ATVPS34<br>(Arabidopsis<br>Thaliana Vacuolar<br>Protein Sorting<br>34);<br>Phosphatidylinositol<br>3-Kinase               | 0.2955 | 2.4594 | 1 | 40.5680 | 0.2426  | -0.0233 |
| OSJNBa0062C<br>05.25 | Putative PPR<br>Repeat<br>Containing<br>Protein | At3g60050 | Pentatricopeptide<br>(PPR) Repeat-<br>Containing<br>Protein                                                               | 0.4115 | 2.6963 | 1 | 62.3950 | -0.2573 | -0.0410 |
| OSJNBa0063C<br>18.19 | Unknown Protein                                 | At1g62640 | KAS III (3-<br>KETOACYL-<br>ACYL CARRIER<br>PROTEIN<br>SYNTHASE III);<br>3-Oxoacyl-[Acyl-<br>Carrier-Protein]<br>Synthase | 0.3198 | 3.4367 | 1 | 43.0990 | -0.0711 | -0.0539 |
| OSJNBa0064M<br>23.11 | Unknown Protein                                 | At3g02310 | SEP2<br>(SEPALLATA2);<br>DNA Binding /<br>Transcription<br>Factor                                                         | 0.4594 | 3.5551 | 1 | 60.4350 | -0.2450 | -0.0341 |
| OSJNBa0064M<br>23.14 | Unknown Protein                                 | At5g24530 | Oxidoreductase,<br>2OG-Fe(II)<br>Oxygenase<br>Family Protein                                                              | 0.2936 | 4.0773 | 1 | 82.9580 | -0.5122 | -0.0718 |
| OSJNBa0065C<br>16.15 | Putative Beta-<br>Glucosidase                   | At1g26560 | Glycosyl<br>Hydrolase Family<br>1 Protein                                                                                 | 0.2339 | 4.3712 | 1 | 56.7680 | -0.0445 | -0.0297 |
| OSJNBa0068A<br>07.23 | Putative Lipase                                 | At1g28570 | GDSL-Motif<br>Lipase, Putative                                                                                            | 0.5926 | 3.9771 | 1 | 90.9090 | -0.4679 | -0.0424 |
| OSJNBa0068L<br>06.7  | Unknown Protein                                 | At1g58140 | Transposable<br>Element Gene;<br>Copia-Like<br>Retrotransposon<br>Family,                                                 | 0.7615 | 4.7407 | 1 | 41.2050 | -0.1896 | -0.0143 |
| OSJNBa0070M<br>12.4  | Unknown Protein                                 | At2g35930 | U-Box Domain-<br>Containing<br>Protein                                                                                    | 0.4831 | 4.1621 | 1 | 95.5610 | -0.3883 | -0.0363 |
| OSJNBa0070M<br>12.7  | Unknown Protein                                 | At3g15130 | Pentatricopeptide<br>(PPR) Repeat-<br>Containing<br>Protein                                                               | 0.4786 | 4.7006 | 1 | 90.9940 | -0.3997 | -0.0370 |

|                   |                                           |           |                                                                                   |        |        |   |         |         |         |
|-------------------|-------------------------------------------|-----------|-----------------------------------------------------------------------------------|--------|--------|---|---------|---------|---------|
| OSJNBa0070N04.6   | Putative Kinase                           | At1g49270 | Protein Kinase Family Protein                                                     | 0.3744 | 4.3066 | 1 | 94.3050 | -0.3884 | -0.0363 |
| OSJNBa0070N04.9   | Unknown Protein                           | At1g05070 | Unknown Protein                                                                   | 0.3580 | 2.5749 | 1 | 62.5770 | 0.1026  | -0.0913 |
| OSJNBa0070O11.10  | Unknown Protein                           | At5g10790 | UBP22 (UBIQUITIN-SPECIFIC PROTEASE 22); Ubiquitin-Specific Protease               | 0.3480 | 4.1886 | 1 | 50.0000 | -0.0315 | -0.0338 |
| OSJNBa0073A21.16  | SAM-Dependent Methyltransferase-Like      | At1g54310 | RNA Binding                                                                       | 0.2447 | 2.1335 | 1 | 37.1950 | -0.0021 | -0.0237 |
| OSJNBa0073L01.2   | Putative Acetyl-Coa Carboxylase           | At1g36160 | ACC1 (ACETYL-COENZYME A CARBOXYLASE 1); Acetyl-Coa Carboxylase                    | 0.2025 | 3.3011 | 1 | 39.0430 | -0.1101 | -0.0068 |
| OSJNBa0073L20.5   | Putative CDP-Diacylglycerol Synthetase    | At4g26770 | Phosphatidate Cytidyltransferase, Putative / CDP-Diglyceride Synthetase, Putative | 0.2169 | 2.0388 | 1 | 47.0170 | -0.0969 | -0.0309 |
| OSJNBa0075N02.118 | Tetratricopeptide Repeat (TPR)-Containing | At5g17270 | Tetratricopeptide Repeat (TPR)-Containing Protein                                 | 0.4652 | 1.9954 | 1 | 47.0170 | -0.0722 | -0.0193 |
| OSJNBa0076F20.9   | Putative Retrotransposon Polyprotein      | At4g21360 | Transposable Element Gene                                                         | 1.1693 | 2.3529 | 1 | 54.6390 | -0.4360 | -0.0837 |
| OSJNBa0078D06.30  | Putative Protein Phosphatase 2C           | At3g17090 | Protein Phosphatase Type 2C                                                       | 0.3029 | 4.2242 | 1 | 67.8470 | -0.4542 | -0.0591 |
| OSJNBa0078K05.12  | Putative Sesquiterpene Cyclase            | At3g14520 | Terpene Synthase/Cyclase Family Protein                                           | 0.7611 | 1.5319 | 1 | 41.9350 | 0.0531  | -0.0202 |
| OSJNBa0079M09.14  | Unknown Protein                           | At4g37940 | AGL21 (AGAMOUS-LIKE 21); Transcription Factor                                     | 0.4859 | 1.6643 | 1 | 59.0240 | -0.1139 | -0.0405 |
| OSJNBa0081C01.1   | Unknown Protein                           | At2g20770 | Lanthionine Synthetase C-Like Family Protein                                      | 0.3005 | 1.9045 | 1 | 58.8530 | -0.3008 | -0.0334 |
| OSJNBa0081C01.5   | Unknown Protein                           | At2g20750 | Atexpb1 (Arabidopsis)                                                             | 0.2925 | 3.8990 | 1 | 91.8520 | -0.3791 | -0.0543 |

|                      |                                             |           |                                                                                                                              |        |        |   |         |         |         |
|----------------------|---------------------------------------------|-----------|------------------------------------------------------------------------------------------------------------------------------|--------|--------|---|---------|---------|---------|
|                      |                                             |           | Thaliana<br>Expansin B1)                                                                                                     |        |        |   |         |         |         |
| OSJNBa0081P<br>02.1  | Hypothetical<br>Protein                     | At1g25190 | Unknown Protein                                                                                                              | 0.4764 | 1.9322 | 1 | 56.6100 | -0.3655 | -0.0502 |
| OSJNBa0082M<br>15.18 | Putative                                    | At1g63680 | PDE316<br>(PIGMENT<br>DEFECTIVE<br>EMBRYO); ATP<br>Binding / Ligase                                                          | 0.3667 | 4.7662 | 1 | 64.7400 | -0.5582 | -0.0129 |
| OSJNBa0083F<br>15.12 | Putative<br>Sesquiterpene<br>Synthase       | At5g23960 | Terpene<br>Synthase/Cyclase<br>Family Protein                                                                                | 0.7098 | 2.5178 | 1 | 34.3610 | 0.3895  | -0.0178 |
| OSJNBa0083M<br>08.1  | Putative Trna<br>Synthetase                 | At5g26707 | Unknown Protein                                                                                                              | 0.1758 | 4.2006 | 1 | 43.6090 | -0.1668 | -0.0186 |
| OSJNBa0083M<br>16.19 | Putative<br>Receptor Kinase                 | At1g68400 | Leucine-Rich<br>Repeat<br>Transmembrane<br>Protein Kinase,<br>Putative                                                       | 0.4219 | 4.6299 | 1 | 88.4900 | -0.3624 | -0.0369 |
| OSJNBa0083N<br>12.1  | Unknown Protein                             | At1g21230 | WAK5 (WALL<br>ASSOCIATED<br>KINASE 5);<br>Kinase/ Protein<br>Serine/Threonine<br>Kinase                                      | 0.6262 | 3.2186 | 1 | 48.2860 | -0.2433 | -0.0139 |
| OSJNBa0084K<br>01.4  | Unknown Protein                             | At5g03220 | Transcriptional<br>Co-Activator-<br>Related                                                                                  | 0.1854 | 2.6569 | 1 | 37.8050 | 0.1119  | -0.0182 |
| OSJNBa0084K<br>11.9  | Unknown Protein                             | At1g76040 | CPK29 (Calcium-<br>Dependent<br>Protein Kinase<br>29); Calcium- And<br>Calmodulin-<br>Dependent<br>Protein Kinase/<br>Kinase | 0.2656 | 4.3867 | 1 | 69.3710 | -0.2706 | -0.0251 |
| OSJNBa0085I<br>0.3   | Unknown Protein                             | At1g79350 | EMB1135<br>(EMBRYO<br>DEFECTIVE<br>1135); DNA<br>Binding                                                                     | 0.2092 | 4.7516 | 1 | 33.5880 | 0.3051  | -0.0125 |
| OSJNBa0086F<br>04.36 | Putative Fertility<br>Restorer<br>Homologue | At5g01110 | Pentatricopeptide<br>(PPR) Repeat-<br>Containing<br>Protein                                                                  | 0.9791 | 2.8619 | 1 | 58.4850 | -0.3178 | -0.0168 |
| OSJNBa0086F          | Putative                                    | At1g22990 | Heavy-Metal-                                                                                                                 | 0.4172 | 3.2495 | 1 | 93.7930 | -0.4558 | -0.1633 |

|                  |                                                 |           |                                                                         |        |        |   |         |         |         |
|------------------|-------------------------------------------------|-----------|-------------------------------------------------------------------------|--------|--------|---|---------|---------|---------|
| 04.42            | Farnesylated Protein                            |           | Associated Domain-Containing Protein / Copper Chaperone (CCH)-Related   |        |        |   |         |         |         |
| OSJNBa0086O06.1  | Unknown Protein                                 | At3g60160 | ATMRP9 (Arabidopsis Thaliana Multidrug Resistance-Associated Protein 9) | 0.2213 | 2.0701 | 1 | 39.9440 | 0.2245  | -0.0134 |
| OSJNBa0086O06.11 | Unknown Protein                                 | At3g19380 | U-Box Domain-Containing Protein                                         | 0.8739 | 4.2490 | 1 | 95.1900 | -0.4142 | -0.0430 |
| OSJNBa0087F21.31 | Putative Plasma Membrane H <sup>+</sup> -Atpase | At2g18960 | AHA1 (PLASMA MEMBRANE PROTON ATPASE); Atpase                            | 0.1659 | 4.8311 | 1 | 93.2600 | -0.4884 | -0.0200 |
| OSJNBa0088I06.20 | Putative Nodulin Mtn21 Protein                  | At5g07050 | Nodulin Mtn21 Family Protein                                            | 0.3066 | 4.1764 | 1 | 91.7950 | -0.4655 | -0.0490 |
| OSJNBa0089K24.3  | Hypothetical Protein                            | At1g24090 | Rnase H Domain-Containing Protein                                       | 0.7929 | 3.7342 | 1 | 77.5400 | -0.3191 | -0.0608 |
| OSJNBa0091C07.1  | Unknown Protein                                 | At1g74580 | Pentatricopeptide (PPR) Repeat-Containing Protein                       | 0.9212 | 4.6606 | 1 | 54.0100 | -0.5227 | -0.0271 |
| OSJNBa0091C18.37 | Putative Actin Related Protein 2                | At3g27000 | ARP2 (WURM); Structural Constituent Of Cytoskeleton                     | 0.0801 | 2.6873 | 1 | 39.3940 | 0.0981  | -0.0355 |
| OSJNBa0091E13.20 | Hypothetical Protein                            | At3g19540 | Unknown Protein                                                         | 0.2410 | 2.7686 | 1 | 62.0440 | -0.7671 | -0.0566 |
| OSJNBa0091J19.10 | Unknown Protein                                 | At5g44450 | Unknown Protein                                                         | 0.3750 | 3.8228 | 1 | 54.9650 | -0.4505 | -0.0580 |
| OSJNBa0091J19.14 | Hypothetical Protein                            | At3g12870 | Unknown Protein                                                         | 0.3572 | 3.7184 | 1 | 88.9870 | -0.4952 | -0.1008 |
| OSJNBa0091P11.22 | Putative Pentatricopeptide Repeat Containing    | At5g56310 | Pentatricopeptide (PPR) Repeat-Containing Protein                       | 0.6594 | 3.2606 | 1 | 67.7480 | -0.3938 | -0.0308 |
| OSJNBa0091P11.24 | Putative Auxin Independent Growth-Related       | At2g03280 | Unknown Protein                                                         | 0.2962 | 2.3026 | 1 | 44.4190 | -0.2024 | -0.0408 |

|                      |                                             |           |                                                                                                                 |        |        |   |         |         |         |
|----------------------|---------------------------------------------|-----------|-----------------------------------------------------------------------------------------------------------------|--------|--------|---|---------|---------|---------|
| OSJNBa0092N<br>12.12 | Putative<br>Receptor-Like<br>Protein Kinase | At2g01950 | BRL2 (BRI1-LIKE<br>2); ATP Binding /<br>Protein<br>Serine/Threonine<br>Kinase                                   | 0.3150 | 4.9436 | 1 | 94.2510 | -0.3951 | -0.0093 |
| OSJNBa0093M<br>23.10 | Germin-Like<br>Protein                      | At1g09560 | GLP5 (GERMIN-<br>LIKE PROTEIN<br>5); Manganese<br>Ion Binding /<br>Metal Ion Binding<br>/ Nutrient<br>Reservoir | 0.3281 | 3.7958 | 1 | 97.6960 | -0.4295 | -0.0653 |
| OSJNBa0093O<br>08.12 | Unknown Protein                             | At4g14630 | GLP9 (GERMIN-<br>LIKE PROTEIN<br>9); Manganese<br>Ion Binding /<br>Metal Ion Binding<br>/ Nutrient<br>Reservoir | 0.3405 | 2.4558 | 1 | 72.7270 | -0.4796 | -0.0791 |
| OSJNBa0093O<br>08.13 | Unknown Protein                             | At3g14580 | Pentatricopeptide<br>(PPR) Repeat-<br>Containing<br>Protein                                                     | 0.5316 | 4.1602 | 1 | 58.5710 | -0.0549 | -0.0712 |
| OSJNBa0093P<br>23.1  | Unknown Protein                             | At2g13610 | ABC Transporter<br>Family Protein                                                                               | 1.0592 | 3.5275 | 1 | 42.4660 | 0.4155  | -0.0526 |
| OSJNBa0094J0<br>8.18 | Putative Amino<br>Acid Transporter          | At5g16740 | Amino Acid<br>Transporter<br>Family Protein                                                                     | 0.9994 | 4.2511 | 1 | 93.5480 | -0.4082 | -0.0483 |
| OSJNBa0095C<br>07.6  | Putative Protein<br>Kinase                  | At5g46570 | Protein Kinase<br>Family Protein                                                                                | 0.1483 | 1.9808 | 1 | 62.3970 | -0.4507 | -0.0508 |
| OSJNBa0096F<br>01.8  | Unknown Protein                             | At3g26290 | CYP71B26<br>(Cytochrome<br>P450, Family 71,<br>Subfamily B,<br>Polypeptide 26);<br>Oxygen Binding               | 0.6773 | 4.4115 | 1 | 80.4260 | -0.3003 | -0.0152 |
| OSJNBb0003E<br>08.13 | Putative Nitrate<br>Transporter<br>NRT1-5   | At5g62680 | Proton-Dependent<br>Oligopeptide<br>Transport (POT)<br>Family Protein                                           | 0.5068 | 4.5568 | 1 | 94.6400 | -0.4531 | -0.0277 |
| OSJNBb0003E<br>08.15 | Putative<br>Thioredoxin                     | At5g39950 | ATTRX2<br>(Arabidopsis<br>Thioredoxin H2,<br>Thioredoxin H-<br>Type 1); Thiol-<br>Disulfide                     | 0.4250 | 3.3541 | 1 | 96.0320 | -0.3162 | -0.1790 |



|                        |                                             |           |                                                               |        |        |   |         |         |         |
|------------------------|---------------------------------------------|-----------|---------------------------------------------------------------|--------|--------|---|---------|---------|---------|
|                        |                                             |           | Exchange Intermediate                                         |        |        |   |         |         |         |
| OSJNBb0004A<br>17.9    | Unknown Protein                             | At3g50420 | Pentatricopeptide (PPR) Repeat-Containing Protein             | 0.6063 | 2.1370 | 1 | 60.0290 | -0.3675 | -0.0334 |
| OSJNBb0005B<br>05.10   | Unknown Protein                             | At2g44210 | Unknown Protein                                               | 0.6302 | 3.5141 | 1 | 34.1460 | 0.2651  | -0.0820 |
| OSJNBb0008A<br>05.2    | Unknown Protein                             | At3g29240 | Unknown Protein                                               | 0.4430 | 3.9997 | 1 | 97.1010 | -0.2704 | -0.0541 |
| OSJNBb0008A<br>05.25   | Putative Beta-Galactosidase                 | At5g20710 | BGAL7 (Beta-Galactosidase 7); Beta-Galactosidase              | 0.4552 | 4.7451 | 1 | 60.1020 | -0.4655 | -0.0301 |
| OSJNBb0011A<br>08.13   | Putative Helicase                           | At3g30560 | Transposable Element Gene                                     | 0.5831 | 5.1017 | 1 | 42.1950 | 0.5550  | -0.0045 |
| OSJNBb0011H<br>13.3    | Unknown Protein                             | At1g17870 | Unknown Protein                                               | 0.2559 | 4.4868 | 1 | 93.7840 | -0.3583 | -0.0116 |
| OSJNBb0011H<br>15.39-1 | Putative NADPH-Dependent Reductase          | At4g35250 | Vestitone Reductase-Related                                   | 0.1581 | 2.6484 | 1 | 61.8280 | -0.5747 | -0.0415 |
| OSJNBb0011H<br>15.4    | Putative Auxin Induced Protein              | At1g29430 | Auxin-Responsive Family Protein                               | 0.5491 | 3.3572 | 1 | 80.4510 | -0.3758 | -0.0930 |
| OSJNBb0011N<br>17.9    | Unknown Protein                             | At3g01660 | Methyltransferase                                             | 0.3195 | 3.9232 | 1 | 94.1410 | -0.4144 | -0.0914 |
| OSJNBb0012E<br>08.6    | Unknown Protein                             | At1g37110 | Transposable Element Gene; Copia-Like Retrotransposon Family, | 0.3916 | 4.0005 | 1 | 35.0000 | -0.2462 | -0.0285 |
| OSJNBb0012E<br>08.8    | Unknown Protein                             | At3g26680 | Snm1 (Sensitive To Nitrogen Mustard 1)                        | 0.3787 | 4.3107 | 1 | 52.0790 | -0.4328 | -0.0414 |
| OSJNBb0012I0<br>9.11   | Putative SKP1                               | At4g34210 | ASK11 (ARABIDOPSIS SKP1-LIKE 11); Ubiquitin-Protein Ligase    | 0.4457 | 3.3207 | 1 | 94.6670 | -0.4771 | -0.1019 |
| OSJNBb0012J1<br>0.19   | Unknown Protein                             | At5g51170 | Unknown Protein                                               | 0.3570 | 3.2835 | 1 | 36.0360 | 0.4106  | -0.0750 |
| OSJNBb0013J1<br>3.11   | Unknown Protein                             | At5g35820 | Transposable Element Gene                                     | 0.5140 | 4.3876 | 1 | 35.0550 | -0.1401 | -0.0292 |
| OSJNBb0013K<br>01.1    | Putative Replication Factor C 36kda Subunit | At1g77470 | Replication Factor C 36 Kda, Putative                         | 0.1756 | 1.6978 | 1 | 52.5860 | -0.1426 | -0.0590 |

|                  |                                   |           |                                                                                    |        |        |   |         |         |         |
|------------------|-----------------------------------|-----------|------------------------------------------------------------------------------------|--------|--------|---|---------|---------|---------|
| OSJNBb0013K01.4  | Kinesin Motor Protein 1-Like      | At5g06670 | Kinesin Motor Protein-Related                                                      | 0.2872 | 4.4751 | 1 | 48.0470 | 0.0042  | -0.0410 |
| OSJNBb0013K08.2  | Putative Multidrug Efflux Protein | At3g26590 | MATE Efflux Family Protein                                                         | 0.4518 | 2.0788 | 1 | 83.0110 | -0.4802 | -0.0281 |
| OSJNBb0014I10.10 | Putative Apyrase                  | At5g18280 | Atapy2 (Apyrase 2)                                                                 | 0.3016 | 1.9753 | 1 | 47.8170 | -0.2405 | -0.0564 |
| OSJNBb0014I11.9  | Putative Nitrate Transporter      | At1g12110 | NRT1.1 (Nitrate Transporter 1.1); Transporter                                      | 0.2965 | 4.4195 | 1 | 98.4350 | -0.4536 | -0.0318 |
| OSJNBb0014K18.13 | Unknown Protein                   | At2g40900 | Nodulin Mtn21 Family Protein                                                       | 0.3651 | 4.2176 | 1 | 96.0300 | -0.4846 | -0.0440 |
| OSJNBb0015G09.5  | Unknown Protein                   | At1g11410 | S-Locus Protein Kinase, Putative                                                   | 0.6676 | 4.7972 | 1 | 63.7150 | -0.3346 | -0.0117 |
| OSJNBb0015I02.17 | Putative Acyl-Activating Enzyme   | At1g55320 | Unknown Protein                                                                    | 0.2646 | 4.5166 | 1 | 34.5610 | 0.1390  | -0.0158 |
| OSJNBb0016D16.6  | Unknown Protein                   | At1g19260 | Hat Dimerisation Domain-Containing Protein                                         | 0.4720 | 4.4831 | 1 | 32.0570 | 0.0748  | -0.0130 |
| OSJNBb0016H12.23 | Unknown Protein                   | At1g28010 | PGP14 (P-GLYCOPROTEIN 14); Atpase, Coupled To Transmembrane Movement Of Substances | 1.2824 | 3.5958 | 1 | 75.9260 | -0.4890 | -0.1069 |
| OSJNBb0018A10.13 | Unknown Protein                   | At1g44070 | Transposable Element Gene; CACTA-Like Transposase Family (Tnp2/En/Spm),            | 0.6681 | 4.2066 | 1 | 52.0640 | 0.2250  | -0.0233 |
| OSJNBb0021C10.25 | Hypothetical Protein              | At1g51130 | Unknown Protein                                                                    | 0.8198 | 3.6301 | 1 | 44.1180 | 0.1903  | -0.0635 |
| OSJNBb0022F23.3  | Unknown Protein                   | At2g04780 | Fla7 (Fla7)                                                                        | 0.5819 | 2.6489 | 1 | 90.7340 | -0.3535 | -0.0814 |
| OSJNBb0022P19.1  | Unknown Protein                   | At2g47800 | ATMRP4 (Arabidopsis Thaliana Multidrug Resistance-Associated Protein 4)            | 0.4293 | 1.8483 | 1 | 61.1030 | -0.4419 | -0.0159 |
| OSJNBb0024B      | Putative Ran                      | At5g19820 | EMB2734                                                                            | 0.2255 | 2.9683 | 1 | 51.2080 | -0.1848 | -0.0180 |

|                   |                                              |           |                                                                                                   |        |        |   |         |         |         |
|-------------------|----------------------------------------------|-----------|---------------------------------------------------------------------------------------------------|--------|--------|---|---------|---------|---------|
| 16.2              | Binding Protein                              |           | (EMBRYO DEFECTIVE 2734); Lyase                                                                    |        |        |   |         |         |         |
| OSJNBb0024J0 4.2  | Expressed Protein                            | At3g58520 | Unknown Protein                                                                                   | 0.9540 | 4.2017 | 1 | 75.3350 | -0.4970 | -0.0516 |
| OSJNBb0031B 09.22 | Putative Lycopene Beta-Cyclase               | At3g10230 | Lyc (Lycopene Cyclase)                                                                            | 0.2684 | 4.3534 | 1 | 96.8020 | -0.4378 | -0.0104 |
| OSJNBb0034I1 3.21 | Unknown Protein                              | At5g39090 | Transferase Family Protein                                                                        | 0.8927 | 4.2873 | 1 | 86.7010 | -0.3929 | -0.0301 |
| OSJNBb0035N 21.11 | Unknown Protein, Contains Hat Family         | At3g42170 | Transposase                                                                                       | 0.5417 | 2.5335 | 1 | 48.6410 | -0.2476 | -0.0168 |
| OSJNBb0036F 07.1  | Hypothetical Protein                         | At3g04750 | Pentatricopeptide (PPR) Repeat-Containing Protein                                                 | 0.5914 | 3.0393 | 1 | 59.6570 | -0.5919 | -0.0343 |
| OSJNBb0036F 07.12 | Putative Beige Protein                       | At1g03060 | WD-40 Repeat Family Protein / Beige-Related                                                       | 0.2548 | 3.7636 | 1 | 38.4890 | -0.0909 | -0.0041 |
| OSJNBb0036G 09.18 | Cytochrome B245 Beta Chain Homolog Rboha     | At1g64060 | ATRBOH F (RESPIRATORY BURST OXIDASE PROTEIN F); NAD(P)H Oxidase                                   | 0.2361 | 4.8839 | 1 | 58.7440 | -0.3287 | -0.0306 |
| OSJNBb0038A 07.4  | Putative Glutathione S-Transferase           | At1g59700 | ATGSTU16 (Arabidopsis Thaliana Glutathione S-Transferase (Class Tau) 16); Glutathione Transferase | 0.5252 | 2.3655 | 1 | 91.5560 | -0.4697 | -0.0801 |
| OSJNBb0040D 15.1  | Unknown Protein                              | At3g58670 | Unknown Protein                                                                                   | 0.3513 | 3.8478 | 1 | 35.9850 | 0.2652  | -0.0712 |
| OSJNBb0040H 10.1  | Alpha/Beta Hydrolase-Like Protein            | At3g29770 | Hydrolase, Alpha/Beta Fold Family Protein                                                         | 0.2231 | 3.6094 | 1 | 49.0680 | 0.0171  | -0.0895 |
| OSJNBb0042J1 7.15 | Putative Pentatricopeptide Repeat-Containing | At2g20540 | Pentatricopeptide (PPR) Repeat-Containing Protein                                                 | 0.4779 | 4.4861 | 1 | 84.8200 | -0.3812 | -0.0635 |
| OSJNBb0043C 10.13 | Putative Lysine Decarboxylase-Like Protein   | At3g53450 | Unknown Protein                                                                                   | 0.1840 | 4.9788 | 1 | 72.5890 | -0.5280 | -0.1114 |
| OSJNBb0044B       | Putative Casein                              | At3g23340 | CKL10 (Casein                                                                                     | 0.1140 | 3.9702 | 1 | 42.8570 | 0.2106  | -0.0258 |

|                      |                                                       |           |                                                                         |        |        |   |         |         |         |
|----------------------|-------------------------------------------------------|-----------|-------------------------------------------------------------------------|--------|--------|---|---------|---------|---------|
| 19.2                 | Kinase                                                |           | Kinase I-Like 10);<br>Casein Kinase I/<br>Kinase                        |        |        |   |         |         |         |
| OSJNBb0044B<br>19.7  | Hypothetical<br>Protein                               | At1g03950 | SNF7 Family<br>Protein                                                  | 0.1697 | 1.2751 | 1 | 44.6150 | 0.0219  | -0.0599 |
| OSJNBb0048A<br>17.1  | Casein Kinase II<br>Alpha Subunit,<br>5'-Partial      | At5g67380 | CKA1 (CASEIN<br>KINASE ALPHA<br>1); Kinase                              | 0.0817 | 3.4936 | 1 | 34.2660 | 0.0230  | -0.0867 |
| OSJNBb0048A<br>17.10 | Unknown Protein                                       | At1g77360 | Pentatricopeptide<br>(PPR) Repeat-<br>Containing<br>Protein             | 0.3383 | 3.1973 | 1 | 64.8350 | -0.5059 | -0.0401 |
| OSJNBb0048D<br>20.14 | Alpha-Expansin                                        | At2g03090 | Atexpa15<br>(Arabidopsis<br>Thaliana<br>Expansin A15)                   | 0.2272 | 3.9228 | 1 | 96.5910 | -0.3839 | -0.0356 |
| OSJNBb0048I2<br>1.12 | Putative GTP-<br>Binding Protein                      | At4g02790 | GTP-Binding<br>Family Protein                                           | 0.3221 | 4.1907 | 1 | 49.5770 | 0.2859  | -0.0555 |
| OSJNBb0050N<br>02.3  | Unknown Protein                                       | At3g49070 | Unknown Protein                                                         | 0.7074 | 4.2393 | 1 | 93.0360 | -0.4330 | -0.0359 |
| OSJNBb0050O<br>03.10 | Unknown Protein                                       | At3g17360 | POK1<br>(PHRAGMOPLAS<br>T ORIENTING<br>KINESIN 1);<br>Microtubule Motor | 1.0503 | 4.1549 | 1 | 57.5600 | -0.2062 | -0.0754 |
| OSJNBb0050O<br>03.15 | Unknown Protein                                       | At4g38890 | Dihydrouridine<br>Synthase Family<br>Protein                            | 0.3292 | 3.0839 | 1 | 43.5460 | -0.2551 | -0.0285 |
| OSJNBb0053G<br>03.3  | Hypothetical<br>Protein                               | At2g24970 | Unknown Protein                                                         | 0.5972 | 2.1761 | 1 | 83.4480 | -0.3649 | -0.1336 |
| OSJNBb0054B<br>09.7  | Unknown Protein                                       | At1g20390 | Hypothetical<br>Protein                                                 | 0.7760 | 4.4139 | 1 | 65.3280 | -0.4689 | -0.0435 |
| OSJNBb0058B<br>20.9  | Putative Disease<br>Resistance<br>Response<br>Protein | At1g65870 | Disease<br>Resistance-<br>Responsive<br>Family Protein                  | 0.8006 | 3.7264 | 1 | 92.8960 | -0.2422 | -0.1048 |
| OSJNBb0059K<br>02.9  | Unknown Protein                                       | At1g53920 | GLIP5 (GDSL-<br>Motif Lipase 5);<br>Carboxylic Ester<br>Hydrolase       | 1.0529 | 4.0704 | 1 | 86.9570 | -0.5342 | -0.0330 |
| OSJNBb0060M<br>15.2  | Unknown Protein                                       | At1g19920 | Aps2 (Atp<br>Sulfurylase<br>Precursor)                                  | 0.1288 | 4.0923 | 1 | 53.5930 | -0.3176 | -0.0346 |
| OSJNBb0061I1<br>8.14 | Conserved<br>Unknown Protein<br>With Similarity       | At1g72320 | APUM23<br>(ARABIDOPSIS<br>PUMILIO 23);                                  | 0.5316 | 2.0895 | 1 | 38.8170 | -0.1610 | -0.0186 |

|                       | To                                            |           | RNA Binding                                                                        |        |        |   |         |         |         |
|-----------------------|-----------------------------------------------|-----------|------------------------------------------------------------------------------------|--------|--------|---|---------|---------|---------|
| OSJNBb006111<br>8.20  | Putative Red Chlorophyll Catabolite Reductase | At4g37000 | Acid2 (Accelerated Cell Death 2)                                                   | 0.7152 | 4.0063 | 1 | 96.7150 | -0.3389 | -0.0541 |
| OSJNBb0062P<br>14.106 | Putative Cytochrome P450 77A3                 | At2g42250 | CYP712A1 (Cytochrome P450, Family 712, Subfamily A, Polypeptide 1); Oxygen Binding | 1.0301 | 4.4284 | 1 | 84.7110 | -0.4178 | -0.0190 |
| OSJNBb0065J0<br>9.8   | Unknown Protein                               | At3g53150 | UGT73D1 (UDP-Glucosyl Transferase 73D1); UDP-Glycosyltransferase                   | 0.6439 | 4.4016 | 1 | 88.0600 | -0.4442 | -0.0253 |
| OSJNBb0070J1<br>6.2   | Unknown Protein                               | At4g21760 | BGLU47 (Beta-Glucosidase 47); Hydrolase, Hydrolyzing O-Glycosyl Compounds          | 0.4256 | 3.9844 | 1 | 72.6280 | -0.1043 | -0.0820 |
| OSJNBb0070J1<br>6.3   | Unknown Protein                               | At1g61820 | BGLU46; Hydrolase, Hydrolyzing O-Glycosyl Compounds                                | 0.4399 | 4.3845 | 1 | 68.3440 | -0.2147 | -0.0360 |
| OSJNBb0072E<br>24.15  | Putative Ubiquitin Protein Ligase             | At3g53090 | UPL7 (Ubiquitin-Protein Ligase 7); Ubiquitin-Protein Ligase                        | 0.3177 | 2.5911 | 1 | 35.4430 | 0.0602  | -0.0141 |
| OSJNBb0075O<br>18.121 | Osh45                                         | At5g25220 | Knat3 (Knotted1-Like Homeobox Gene 3)                                              | 0.1387 | 3.5543 | 1 | 50.9090 | -0.0507 | -0.0657 |
| OSJNBb0079B<br>02.9   | Unknown Protein                               | At1g14340 | RNA Recognition Motif (RRM)-Containing Protein                                     | 0.3574 | 1.8144 | 1 | 45.7260 | -0.0638 | -0.0359 |
| OSJNBb0079B<br>16.5   | Putative Pentatricopeptide Repeat Protein     | At5g66500 | Pentatricopeptide (PPR) Repeat-Containing Protein                                  | 0.6206 | 2.3332 | 1 | 50.0000 | -0.3571 | -0.0214 |
| OSJNBb0088C<br>09.12  | Unknown Protein                               | At1g43580 | Unknown Protein                                                                    | 0.2729 | 1.8212 | 1 | 62.9290 | -0.4464 | -0.0508 |
| OSJNBb0089B           | Unknown Protein                               | At1g08550 | Npq1 (Non-                                                                         | 0.3059 | 4.3424 | 1 | 58.7950 | -0.2669 | -0.0647 |

|                      |                                        |           |                                                                                    |        |        |   |         |         |         |
|----------------------|----------------------------------------|-----------|------------------------------------------------------------------------------------|--------|--------|---|---------|---------|---------|
| 03.4                 |                                        |           | Photochemical Quenching 1)                                                         |        |        |   |         |         |         |
| OSJNBb0089K<br>24.8  | Unknown Protein                        | At1g58190 | Leucine-Rich Repeat Family Protein                                                 | 0.9577 | 1.8217 | 1 | 56.6000 | -0.2787 | -0.0390 |
| OSJNBb0092C<br>08.31 | Putative Glutamate/Malate Translocator | At5g64290 | DCT/DIT2.1 (DICARBOXYLATE TRANSPORT); Oxoglutarate:Malate Antiporter               | 0.2048 | 1.9989 | 1 | 59.4500 | -0.3029 | -0.0319 |
| OSJNBb0092E<br>21.11 | Putative Gibberellin 20-Oxidase        | At5g07200 | YAP169 (Gibberellin 20 Oxidase 3); Gibberellin 20-Oxidase                          | 0.4865 | 4.0783 | 1 | 95.1530 | -0.3893 | -0.0262 |
| OSJNBb0096M<br>04.15 | Putative Cytochrome P450               | At3g26330 | CYP71B37 (Cytochrome P450, Family 71, Subfamily B, Polypeptide 37); Oxygen Binding | 0.5114 | 4.4232 | 1 | 92.9860 | -0.4138 | -0.0239 |
| OSJNBb0099P<br>06.1  | Unknown Protein                        | At3g17470 | Rela/Spot Domain-Containing Protein / Calcium-Binding EF-Hand Family Protein       | 0.4391 | 4.4798 | 1 | 89.5720 | -0.5496 | -0.0448 |
| OSJNBb0111K<br>12.10 | Putative Beta-Glucosidase              | At4g27820 | Glycosyl Hydrolase Family 1 Protein                                                | 0.5010 | 2.1838 | 1 | 51.7860 | -0.1429 | -0.0264 |
| OSJNBb0118P<br>14.5  | Unknown Protein                        | At1g76130 | AMY2/ATAMY2 (ALPHA-AMYLASE-LIKE 2); Alpha-Amylase                                  | 0.2144 | 3.4999 | 1 | 46.2720 | -0.1488 | -0.0282 |
| P0003E08.6           | Hypothetical Protein                   | At2g42960 | Protein Kinase Family Protein                                                      | 0.2998 | 4.3531 | 1 | 49.1340 | -0.2276 | -0.0244 |
| P0010C01.19          | Putative Beta-Expansin                 | At4g28250 | Atexpb3 (Arabidopsis Thaliana Expansin B3)                                         | 0.3352 | 2.9874 | 1 | 86.2830 | -0.4397 | -0.0468 |
| P0011G08.16          | Putative Receptor-Like Protein Kinase  | At5g61350 | Protein Kinase Family Protein                                                      | 0.5991 | 4.7836 | 1 | 85.9300 | -0.3890 | -0.0104 |
| P0013B04.13          | Unknown Protein                        | At3g50340 | Unknown Protein                                                                    | 0.4029 | 4.3107 | 1 | 94.2710 | -0.3337 | -0.0573 |
| P0013G02.12          | Putative Ribosomal RNA                 | At1g55030 | F-Box Family Protein                                                               | 1.5032 | 4.3442 | 1 | 67.2490 | -0.5123 | -0.0399 |

|               |                                        |           |                                                                 |        |        |   |         |         |         |
|---------------|----------------------------------------|-----------|-----------------------------------------------------------------|--------|--------|---|---------|---------|---------|
|               | Apurinic Site Specific                 |           |                                                                 |        |        |   |         |         |         |
| P0018C07.120  | Pectin Methyl-esterase-Like Protein    | At5g55590 | QRT1 (QUARTET 1); Pectinesterase                                | 0.7279 | 3.9485 | 1 | 88.6210 | -0.4937 | -0.0346 |
| P0020C11.29-1 | Putative Pentatricopeptide (PPR)       | At1g09900 | Pentatricopeptide (PPR) Repeat-Containing Protein               | 0.4125 | 4.4926 | 1 | 68.8340 | -0.4089 | -0.0283 |
| P0020E09.15   | Hypothetical Protein                   | At1g11290 | Pentatricopeptide (PPR) Repeat-Containing Protein               | 0.6131 | 4.7305 | 1 | 62.0080 | -0.6437 | -0.0095 |
| P0020E09.22   | Putative Cinnamoyl-Coa Reductase       | At2g02400 | Cinnamoyl-Coa Reductase Family                                  | 0.3449 | 4.1213 | 1 | 88.6730 | -0.4076 | -0.0398 |
| P0021G06.114  | Putative IAA Amidohydrolase            | At3g02875 | ILR1 (IAA-LEUCINE RESISTANT 1); Metalloproteinase               | 0.4133 | 2.4076 | 1 | 76.1120 | -0.3836 | -0.0037 |
| P0024C06.22   | Putative Flavonol 3'-Sulfotransferase  | At3g45070 | Sulfotransferase Family Protein                                 | 0.6651 | 1.8422 | 1 | 67.5080 | -0.3468 | -0.0397 |
| P0024C06.31   | Putative Fatty Acyl Coa Reductase      | At5g22500 | Acyl Coa Reductase, Putative / Male-Sterility Protein, Putative | 0.4335 | 2.8409 | 1 | 70.6520 | -0.2922 | -0.0274 |
| P0026H03.15   | Calcium-Binding EF Hand-Like Protein   | At3g24110 | Calcium-Binding EF Hand Family Protein                          | 0.5677 | 3.7357 | 1 | 43.4780 | 0.3446  | -0.0496 |
| P0027G10.30-1 | Acyl-Activating Enzyme 17-Like Protein | At5g23050 | Acyl-Activating Enzyme 17 (AAE17)                               | 0.3573 | 4.1399 | 1 | 45.1520 | -0.2403 | -0.0348 |
| P0030D07.11   | Putative Magnesium/Proton Exchanger    | At2g47600 | ATMHX (MAGNESIUM/PROTON EXCHANGER); Cation:Cation Antipporter   | 0.2699 | 1.9978 | 1 | 41.0190 | -0.0538 | -0.0305 |
| P0031D02.12   | Unknown Protein                        | At3g56290 | Unknown Protein                                                 | 0.3192 | 3.5581 | 1 | 70.0640 | -0.1397 | -0.0882 |
| P0039H02.111  | Putative Prolyl-Trna Synthetase        | At5g52520 | OVA6 (OVULE ABORTION 6); ATP Binding / Aminoacyl-Trna Ligase    | 0.1595 | 1.7451 | 1 | 54.0760 | -0.2591 | -0.0446 |

|               |                                                |           |                                                                                                |        |        |   |         |         |         |
|---------------|------------------------------------------------|-----------|------------------------------------------------------------------------------------------------|--------|--------|---|---------|---------|---------|
| P0040H05.31   | Unknown Protein                                | At1g79390 | Unknown Protein                                                                                | 0.2044 | 3.3494 | 1 | 75.2000 | -0.5147 | -0.1445 |
| P0048F12.11   | Putative Phospholipid/Glycerol Acyltransferase | At1g02390 | ATGPAT2/GPAT2 (GLYCEROL-3-PHOSPHATE ACYLTRANSFERASE 2); Acyltransferase                        | 0.5396 | 2.7952 | 1 | 73.8610 | -0.4171 | -0.0212 |
| P0135D07.43   | Putative CRT/DRE Binding Factor 1              | At4g25470 | CBF2 (FREEZING TOLERANCE QTL 4); DNA Binding / Transcription Factor/ Transcriptional Activator | 0.4937 | 3.7501 | 1 | 84.4340 | -0.2805 | -0.1004 |
| P0403C05.9    | Putative Chorismate Mutase Precursor           | At1g69370 | CM3 (CHORISMATE MUTASE 3); Chorismate Mutase                                                   | 0.3104 | 3.9937 | 1 | 52.4160 | -0.0772 | -0.0850 |
| P0404D10.16   | Stress Inducible Protein-Like                  | At1g22700 | Binding                                                                                        | 0.2131 | 2.3243 | 1 | 28.0990 | 0.0765  | -0.0705 |
| P0406E03.14-2 | GDSL-Motif Lipase/Hydrolase-Like               | At2g04570 | GDSL-Motif Lipase/Hydrolase Family Protein                                                     | 0.4251 | 4.0305 | 1 | 87.7250 | -0.4969 | -0.0659 |
| P0406E03.15   | SWIB Complex BAF60b Domain-Containing          | At4g26810 | SWIB Complex BAF60b Domain-Containing Protein                                                  | 0.3175 | 2.0508 | 1 | 69.0000 | -0.3056 | -0.2206 |
| P0406E03.33   | Transcriptional Regulators Of Nagc/Xylr        | At1g30540 | Atpase, Badf/Badg/Bcra/Bcrd-Type Family                                                        | 0.2924 | 1.4677 | 1 | 44.9850 | -0.0889 | -0.0824 |
| P0408G07.2    | Hypothetical Protein                           | At2g03880 | Pentatricopeptide (PPR) Repeat-Containing Protein                                              | 0.6109 | 4.4426 | 1 | 94.9600 | -0.4369 | -0.0586 |
| P0409B08.4    | Putative Transcription Factor                  | At3g48670 | XH/XS Domain-Containing Protein / XS Zinc Finger Domain-Containing Protein                     | 0.5211 | 4.4044 | 1 | 56.1870 | -0.4419 | -0.0164 |
| P0417F02.7    | Hexokinase II                                  | At1g47840 | Hexokinase, Putative                                                                           | 0.3247 | 1.9558 | 1 | 56.0420 | -0.2053 | -0.0442 |
| P0418E08.114  | Putative UDP-                                  | At3g11340 | UDP-                                                                                           | 0.5950 | 3.0420 | 1 | 74.8880 | -0.2834 | -0.0507 |



|              |                                                  |           |                                                                       |        |        |   |         |         |         |
|--------------|--------------------------------------------------|-----------|-----------------------------------------------------------------------|--------|--------|---|---------|---------|---------|
|              | Glucosyltransferase                              |           | Glucuronosyl/UDP-Glucosyl Transferase Family Protein                  |        |        |   |         |         |         |
| P0419A09.30  | Putative Ethylene Response Factor                | At5g25390 | SHN2 (SHINE2); DNA Binding / Transcription Factor                     | 0.3818 | 3.6392 | 1 | 66.3160 | -0.3618 | -0.0795 |
| P0419A09.34  | Putative SPX (SYG1/Pho81/XPR1) Domain-Containing | At2g26660 | SPX (SYG1/Pho81/XPR1) Domain-Containing Protein                       | 0.3477 | 3.8856 | 1 | 89.6410 | -0.4355 | -0.0636 |
| P0419H03.23  | Phytosulfokine Receptor Precursor-Like           | At1g17240 | Leucine-Rich Repeat Family Protein                                    | 0.5748 | 1.8847 | 1 | 46.9110 | -0.1208 | -0.0219 |
| P0431A03.1   | Unknown Protein                                  | At1g68660 | Unknown Protein                                                       | 0.2478 | 2.6488 | 1 | 63.3990 | -0.3110 | -0.1321 |
| P0431B06.14  | Pentatricopeptide (PPR) Repeat-Containing        | At4g39620 | EMB2453 (EMBRYO DEFECTIVE 2453); Binding                              | 0.4204 | 3.6736 | 1 | 50.4950 | 0.0396  | -0.0488 |
| P0431B06.41  | Putative Inositol Polyphosphate 5-Phosphatase I  | At5g65090 | BST1 (BRISTLED1); Hydrolase                                           | 0.3963 | 4.4277 | 1 | 77.0090 | -0.3649 | -0.0120 |
| P0434E03.15  | Putative Avr9 Elicitor Response Protein          | At5g53340 | Transferase, Transferring Hexosyl Groups                              | 0.3069 | 2.2564 | 1 | 47.6490 | 0.1076  | -0.0802 |
| P0435E12.12  | Putative 12-Oxophytodienoic Acid Reductase       | At1g76680 | OPR1 (12-Oxophytodienoate Reductase 1); 12-Oxophytodienoate Reductase | 0.2880 | 1.4795 | 1 | 52.8360 | -0.1958 | -0.0510 |
| P0435E12.43  | Unknown Protein                                  | At2g44090 | Unknown Protein                                                       | 0.4166 | 1.7416 | 1 | 58.0360 | -0.3625 | -0.0726 |
| P0443H10.10  | Unknown Protein                                  | At1g51580 | KH Domain-Containing Protein                                          | 0.9651 | 4.6378 | 1 | 38.1400 | 0.0070  | -0.0361 |
| P0446B05.22  | Unknown Protein                                  | At3g55580 | Regulator Of Chromosome Condensation (RCC1) Family Protein            | 0.2971 | 2.1398 | 1 | 45.7560 | 0.2181  | -0.0280 |
| P0446F04.116 | Putative 1-Aminocyclopropane-1-Carboxylate       | At1g50960 | ATGA2OX7 (GIBBERELLIN 2-OXIDASE 7); Gibberellin 2-                    | 0.6198 | 4.0098 | 1 | 93.0380 | -0.3436 | -0.0305 |

|               |                                                  |           |                                                                          |        |        |   |         |         |         |
|---------------|--------------------------------------------------|-----------|--------------------------------------------------------------------------|--------|--------|---|---------|---------|---------|
|               |                                                  |           | Beta-Dioxygenase/Gibberellin 20-Oxidase                                  |        |        |   |         |         |         |
| P0446G09.124  | Putative Pentatricopeptide (PPR)                 | At1g71490 | Pentatricopeptide (PPR) Repeat-Containing Protein                        | 0.4821 | 4.6773 | 1 | 58.1710 | -0.1881 | -0.0337 |
| P0451A10.15   | Putative Vacuolar ATP Synthase 16 Kda            | At1g19910 | AVA-P2 (Vacuolar-H+-Pumping Atpase 16 Kda Proteolipid Subunit 2); Atpase | 0.0222 | 3.6451 | 1 | 83.6360 | -0.4428 | -0.1198 |
| P0452F04.33-1 | UDP-Glucuronosyl/UDP-Glucosyl Transferase Family | At1g64100 | DNA Binding / Binding                                                    | 1.0502 | 4.5225 | 1 | 70.1630 | -0.4724 | -0.0338 |
| P0452F10.16   | Hypothetical Protein                             | At3g24570 | Peroxisomal Membrane 22 Kda Family Protein                               | 0.3090 | 3.6896 | 1 | 60.0920 | -0.3469 | -0.1045 |
| P0453E03.107  | Pentatricopeptide (PPR)Repeat-Containing         | At1g01970 | Pentatricopeptide (PPR) Repeat-Containing Protein                        | 0.5381 | 2.0914 | 1 | 58.7800 | 0.0113  | -0.0280 |
| P0453E03.113  | Selenium-Binding Protein-Like                    | At2g29760 | Pentatricopeptide (PPR) Repeat-Containing Protein                        | 0.5190 | 4.4386 | 1 | 66.5360 | -0.4547 | -0.0268 |
| P0453G03.27   | Putative Geranylgeranyl Diphosphate Synthase     | At4g36810 | GGPS1 (GERANYLGERANYL PYROPHOSPHATE SYNTHASE 1); Farnesyltransferase     | 0.3711 | 4.2463 | 1 | 73.9130 | -0.3809 | -0.0232 |
| P0453H10.11   | Putative Protein Phosphatase 2A 48 Kda           | At5g28900 | Calcium-Binding EF Hand Family Protein                                   | 0.2547 | 2.5137 | 1 | 56.0780 | -0.2710 | -0.0444 |
| P0454A11.10   | NPK1-Related Protein Kinase-Like Protein         | At3g07980 | MAPKKK6 (MAP3K EPSILON PROTEIN                                           | 0.9203 | 4.2444 | 1 | 86.1970 | -0.2337 | -0.0829 |

|              |                                                      |           |                                                                                                            |        |        |   |         |         |         |
|--------------|------------------------------------------------------|-----------|------------------------------------------------------------------------------------------------------------|--------|--------|---|---------|---------|---------|
|              |                                                      |           | KINASE 2);<br>Kinase                                                                                       |        |        |   |         |         |         |
| P0454A11.19  | Putative<br>Flavonoid 3',5'-<br>Hydroxylase          | At5g44620 | CYP706A3<br>(Cytochrome<br>P450, Family 706,<br>Subfamily A,<br>Polypeptide 3);<br>Oxygen Binding          | 0.4740 | 3.9937 | 1 | 86.1860 | -0.4034 | -0.0334 |
| P0454H12.17  | Hypothetical<br>Protein                              | At5g09950 | Pentatricopeptide<br>(PPR) Repeat-<br>Containing<br>Protein                                                | 0.7937 | 2.3838 | 1 | 68.2290 | -0.1151 | -0.0467 |
| P0454H12.5   | Unknown Protein                                      | At4g10360 | Unknown Protein                                                                                            | 0.4743 | 1.4764 | 1 | 53.7550 | -0.0477 | -0.0642 |
| P0456A01.12  | Putative<br>Cytochrome<br>P450                       | At3g14680 | CYP72A14<br>(Cytochrome<br>P450, Family 72,<br>Subfamily A,<br>Polypeptide 14);<br>Oxygen Binding          | 0.4210 | 2.2910 | 1 | 58.1780 | -0.0660 | -0.0476 |
| P0456A01.5   | Subtilisin-Like<br>Protease                          | At5g45650 | Subtilase Family<br>Protein                                                                                | 0.4191 | 4.8050 | 1 | 86.8980 | -0.3687 | -0.0063 |
| P0456B03.116 | Inositol<br>Polyphosphate-<br>5-Phosphatase-<br>Like | At2g01900 | Endonuclease/Ex<br>onuclease/Phosp<br>hatase Family<br>Protein                                             | 0.4834 | 4.1946 | 1 | 90.6570 | -0.4469 | -0.0309 |
| P0458A05.17  | Hypothetical<br>Protein                              | At1g74160 | Unknown Protein                                                                                            | 0.9873 | 3.3415 | 1 | 79.4390 | -0.2559 | -0.1082 |
| P0458E05.31  | Putative Rac<br>Gtpase<br>Activating<br>Protein      | At5g22400 | Rac Gtpase<br>Activating Protein,<br>Putative                                                              | 0.2956 | 3.9155 | 1 | 95.8330 | -0.4599 | -0.0578 |
| P0458E05.6   | Putative<br>Chromosome<br>Condensation<br>Factor     | At1g76950 | Zinc Finger<br>Protein (PRAF1) /<br>Regulator Of<br>Chromosome<br>Condensation<br>(RCC1) Family<br>Protein | 0.2964 | 4.8083 | 1 | 32.7630 | 0.1695  | -0.0187 |
| P0458H05.127 | Putative<br>Serine/Threonine<br>Kinase Protein       | At4g23140 | Crk6 (Cysteine-<br>Rich Rlk 6)                                                                             | 0.5849 | 4.6920 | 1 | 74.6330 | -0.2366 | -0.0232 |
| P0461F06.19  | Putative<br>Dioscorin Class<br>A Precursor           | At1g08065 | Carbonate<br>Dehydratase/ Zinc<br>Ion Binding                                                              | 0.5500 | 3.9115 | 1 | 74.1440 | -0.3246 | -0.0462 |
| P0462E11.7   | Putative<br>Ubiquinone                               | At2g47910 | Crr6<br>(Chlororespiratory                                                                                 | 0.3436 | 1.9902 | 1 | 57.1430 | -0.2547 | -0.0640 |

|             |                                              |           |                                                                                                      |        |        |   |         |         |         |
|-------------|----------------------------------------------|-----------|------------------------------------------------------------------------------------------------------|--------|--------|---|---------|---------|---------|
|             | Oxidoreductase Subunit 1                     |           | Reduction 6)                                                                                         |        |        |   |         |         |         |
| P0462H08.5  | Unknown Protein                              | At5g24860 | Fpf1 (Flowering Promoting Factor 1)                                                                  | 0.2956 | 3.0384 | 1 | 94.3400 | -0.3131 | -0.0606 |
| P0468B07.16 | Hypothetical Protein                         | At3g56840 | FAD-Dependent Oxidoreductase Family Protein                                                          | 0.3059 | 2.2022 | 1 | 47.5410 | -0.4364 | -0.0677 |
| P0468B07.18 | Hypothetical Protein                         | At4g37510 | Ribonuclease III Family Protein                                                                      | 0.2110 | 4.5281 | 1 | 69.3230 | -0.2258 | -0.0265 |
| P0468B07.19 | Putative Calmodulin                          | At3g56800 | CAM3 (CALMODULIN 3); Calcium Ion Binding                                                             | 0.0927 | 3.2784 | 1 | 89.0240 | -0.5032 | -0.1219 |
| P0470G10.35 | Putative DNA J Domain Protein                | At1g76700 | DNAJ Heat Shock N-Terminal Domain-Containing Protein                                                 | 0.4352 | 4.1851 | 1 | 62.1780 | -0.3525 | -0.0440 |
| P0471A11.50 | Pentatricopeptide (PPR) Repeat-Containing    | At1g73400 | Pentatricopeptide (PPR) Repeat-Containing Protein                                                    | 0.3356 | 4.3520 | 1 | 68.2690 | -0.4509 | -0.0227 |
| P0475F05.7  | Putative CTR1-Like Protein Kinase            | At5g03730 | CTR1 (CONSTITUTIVE TRIPLE RESPONSE 1); Kinase                                                        | 0.3873 | 3.2872 | 1 | 56.1330 | -0.3490 | -0.0290 |
| P0476H10.11 | PDR-Like ABC Transporter                     | At3g53480 | ATPDR9/PDR9 (PLEIOTROPIC DRUG RESISTANCE 9); Atpase, Coupled To Transmembrane Movement Of Substances | 0.3374 | 5.2243 | 1 | 47.6540 | 0.0967  | -0.0049 |
| P0477A12.6  | Putative Ubiquitin / Ribosomal Protein CEP52 | At3g52590 | UBQ1 (EARLY-RESPONSIVE TO DEHYDRATION 16, UBIQUITIN EXTENSION PROTEIN 1); Protein Binding            | 0.1585 | 3.1022 | 1 | 88.9710 | -0.5644 | -0.0972 |
| P0477B05.11 | Putative Nicotianamine                       | At5g36160 | Aminotransferase-Related                                                                             | 0.3461 | 4.3023 | 1 | 87.5610 | -0.3994 | -0.0393 |

|              |                                                |           |                                                                                  |        |        |   |         |         |         |
|--------------|------------------------------------------------|-----------|----------------------------------------------------------------------------------|--------|--------|---|---------|---------|---------|
|              | Aminotransferase A                             |           |                                                                                  |        |        |   |         |         |         |
| P0477F03.101 | Unknown Protein                                | At5g23040 | CDF1 (CELL GROWTH DEFECT FACTOR 1); Heat Shock Protein Binding                   | 0.2667 | 2.0451 | 1 | 41.8180 | -0.1686 | -0.1026 |
| P0480C01.27  | Putative MRP Protein (ATP/GTP-Binding Protein) | At3g24430 | HCF101 (HIGH-CHLOROPHYLL-FLUORESCENCE 101); ATP Binding                          | 0.1776 | 3.8105 | 1 | 46.9310 | 0.0507  | -0.0311 |
| P0481E12.30  | Hypothetical Protein                           | At5g42660 | Hypothetical Protein                                                             | 0.3442 | 2.5835 | 1 | 50.8970 | -0.0809 | -0.0337 |
| P0481E12.31  | Putative Ribosomal Protein L13                 | At1g78630 | EMB1473 (EMBRYO DEFECTIVE 1473); Structural Constituent Of Ribosome              | 0.2559 | 3.7932 | 1 | 58.4470 | -0.2487 | -0.0820 |
| P0481F05.16  | Putative Potential Copper-Transporting Atpase  | At4g33520 | PAA1 (Metal-Transporting P-Type Atpase 1)                                        | 0.3027 | 1.6860 | 1 | 43.2020 | -0.1448 | -0.0053 |
| P0482C06.5   | Putative Protein Kinase                        | At1g62400 | HT1 (HIGH LEAF TEMPERATURE 1); Kinase/Protein Threonine/Tyrosine Kinase          | 0.3443 | 3.8755 | 1 | 62.7310 | -0.3634 | -0.0495 |
| P0487H05.39  | Putative Importin 7<Ran-Binding Protein 7      | At2g31660 | SAD2 (SUPER SENSITIVE TO ABA AND DROUGHT2); Protein Transporter                  | 0.2091 | 3.6953 | 1 | 32.4720 | 0.1583  | -0.0160 |
| P0489A01.13  | Putative Cytochrome P450                       | At2g21910 | CYP96A5 (Cytochrome P450, Family 96, Subfamily A, Polypeptide 5); Oxygen Binding | 0.5709 | 4.4872 | 1 | 69.3110 | -0.4408 | -0.0129 |
| P0491E01.9   | Cyclin-Like                                    | At3g21870 | CYCP2;1 (Cyclin P2;1); Cyclin-                                                   | 0.7696 | 3.7096 | 1 | 95.0250 | -0.3632 | -0.1071 |

|               |                                         |           |                                                                               |        |        |   |         |         |         |
|---------------|-----------------------------------------|-----------|-------------------------------------------------------------------------------|--------|--------|---|---------|---------|---------|
|               |                                         |           | Dependent Protein Kinase                                                      |        |        |   |         |         |         |
| P0492G09.26   | Unknown Protein                         | At5g18630 | Lipase Class 3 Family Protein                                                 | 0.3442 | 2.6541 | 1 | 47.9090 | 0.0765  | -0.0517 |
| P0494D11.1    | Putative 3-Glucanase                    | At4g31140 | Glycosyl Hydrolase Family 17 Protein                                          | 0.3571 | 4.3719 | 1 | 94.4440 | -0.4058 | -0.0634 |
| P0496D04.20-1 | Putative Integral Membrane Protein      | At2g32040 | Integral Membrane Transporter Family Protein                                  | 0.1343 | 1.9764 | 1 | 35.6540 | -0.0145 | -0.0276 |
| P0498E12.107  | Putative Reticuline Oxidase Precursor   | At5g44400 | FAD-Binding Domain-Containing Protein                                         | 0.6328 | 4.4723 | 1 | 56.1170 | -0.2573 | -0.0098 |
| P0498H04.1    | Putative Bile Acid Beta-Glucosidase     | At1g33700 | Unknown Protein                                                               | 0.3775 | 4.8851 | 1 | 79.1860 | -0.2524 | -0.0137 |
| P0499G10.13-2 | GEKO1-Like Protein                      | At2g03800 | Gek1 (Geko1)                                                                  | 0.2580 | 2.0105 | 1 | 49.0910 | -0.1768 | -0.1369 |
| P0501G01.15   | Hypothetical Protein                    | At5g24030 | C4-Dicarboxylate Transporter/Malic Acid Transport Family Protein              | 0.4539 | 4.4509 | 1 | 95.8130 | -0.4178 | -0.0220 |
| P0501G04.9    | Hydroperoxide Lyase                     | At4g15440 | HPL1 (HYDROPEROXIDE LYASE 1); Heme Binding / Iron Ion Binding / Monooxygenase | 0.4455 | 4.1595 | 1 | 97.1740 | -0.4587 | -0.0563 |
| P0503E05.6    | Putative Hydroxyethylthiazole Kinase    | At3g24030 | Hydroxyethylthiazole Kinase Family Protein                                    | 0.3738 | 1.8856 | 1 | 87.0370 | -0.4586 | -0.0689 |
| P0504A05.25   | Integral Membrane Protein-Like          | At2g35760 | Integral Membrane Family Protein                                              | 0.8628 | 3.7803 | 1 | 93.7500 | -0.3035 | -0.0821 |
| P0506A10.22   | Hypothetical Protein                    | At2g45750 | Dehydration-Responsive Family Protein                                         | 0.6173 | 4.5562 | 1 | 63.7760 | -0.3597 | -0.0395 |
| P0506B12.26   | Unknown Protein                         | At3g12360 | Ankyrin Repeat Family Protein                                                 | 0.3265 | 1.8507 | 1 | 51.6540 | 0.0014  | -0.0274 |
| P0506E04.5    | Hypothetical Protein                    | At3g25270 | Unknown Protein                                                               | 1.0674 | 3.9320 | 1 | 47.0390 | -0.1026 | -0.0271 |
| P0506F02.124  | Putative Receptor-Like Protein Kinase 4 | At4g23160 | Protein Kinase Family Protein                                                 | 0.8328 | 3.3865 | 1 | 81.0340 | -0.3920 | -0.1048 |

|             |                                           |           |                                                                                  |        |        |   |         |         |         |
|-------------|-------------------------------------------|-----------|----------------------------------------------------------------------------------|--------|--------|---|---------|---------|---------|
| P0510F09.22 | SPP30 Homolog                             | At5g58030 | Transport Protein Particle (TRAPP) Component Bet3 Family Protein                 | 0.0518 | 1.7609 | 1 | 45.9770 | -0.1724 | -0.0885 |
| P0515A04.36 | Putative NBS-LRR Type Disease Resistance  | At4g26090 | Rps2 (Resistant To <i>P. Syringae</i> 2)                                         | 0.9176 | 2.6548 | 1 | 43.6770 | 0.1415  | -0.0121 |
| P0518C01.9  | Putative Cysteine Proteinase              | At1g20850 | XCP2 (XYLEM CYSTEINE PEPTIDASE 2); Cysteine-Type Peptidase/Peptidase             | 0.2831 | 4.0347 | 1 | 89.2540 | -0.4046 | -0.0425 |
| P0518F01.24 | Putative Cytochrome P450                  | At3g14630 | CYP72A9 (Cytochrome P450, Family 72, Subfamily A, Polypeptide 9); Oxygen Binding | 0.3703 | 1.9171 | 1 | 52.0450 | 0.2938  | -0.0231 |
| P0519E06.2  | Unknown Protein                           | At2g44850 | Unknown Protein                                                                  | 0.6753 | 2.2810 | 1 | 56.9770 | -0.3872 | -0.0423 |
| P0523B07.7  | Putative Flavonol 4'-Sulfotransferase     | At5g07010 | Sulfotransferase Family Protein                                                  | 0.5858 | 2.0398 | 1 | 53.2080 | -0.1745 | -0.0361 |
| P0524F03.3  | Exostosin Family-Like Protein             | At3g03650 | EDA5 (Embryo Sac Development Arrest 5); Catalytic                                | 0.4424 | 4.3347 | 1 | 88.0730 | -0.4227 | -0.0302 |
| P0528B09.37 | Putative Chorismate Mutase                | At5g10870 | ATCM2 (CHORISMATE MUTASE 2); Chorismate Mutase                                   | 0.4308 | 2.2157 | 1 | 62.8250 | -0.1729 | -0.0546 |
| P0529E05.10 | Hypothetical Protein                      | At3g09060 | Pentatricopeptide (PPR) Repeat-Containing Protein                                | 0.5486 | 1.9405 | 1 | 55.1110 | -0.4657 | -0.0165 |
| P0543C11.29 | Putative Nicotianamine Aminotransferase A | At5g53970 | Aminotransferase, Putative                                                       | 0.3871 | 3.1648 | 1 | 56.1610 | -0.2139 | -0.0372 |
| P0543C11.42 | Hypothetical Protein                      | At1g19480 | Hhh-GPD Base Excision DNA Repair Family Protein                                  | 0.5812 | 4.0379 | 1 | 33.1150 | 0.1825  | -0.0265 |
| P0543D10.30 | Putative                                  | At3g58170 | ATBS14A; Protein                                                                 | 0.2047 | 3.2664 | 1 | 43.8600 | -0.1510 | -0.1116 |

|             |                                              |           |                                                                                         |        |        |   |         |         |         |
|-------------|----------------------------------------------|-----------|-----------------------------------------------------------------------------------------|--------|--------|---|---------|---------|---------|
|             | Bet1/Sft1-Related SNARE (Atbs14a)            |           | Transporter                                                                             |        |        |   |         |         |         |
| P0544B02.16 | Putative Glutamine Amidotransferase Class-I  | At2g23970 | Defense-Related Protein, Putative                                                       | 0.4408 | 3.8831 | 1 | 79.4960 | -0.3230 | -0.0625 |
| P0544B02.31 | Putative Protein Phosphatase Type-2C         | At4g31860 | Protein Phosphatase 2C, Putative / PP2C, Putative                                       | 0.1728 | 4.1245 | 1 | 39.4660 | 0.2585  | -0.0315 |
| P0544B02.5  | Putative Dem Protein                         | At4g33400 | Dem Protein-Related / Defective Embryo And Meristems Protein-Related                    | 0.3254 | 4.5335 | 1 | 77.9030 | -0.4282 | -0.0265 |
| P0544G09.25 | Putative P450 Monooxygenase                  | At4g12310 | CYP706A5 (Cytochrome P450, Family 706, Subfamily A, Polypeptide 5); Oxygen Binding      | 0.4686 | 4.1472 | 1 | 98.5760 | -0.4223 | -0.0520 |
| P0544G09.37 | Putative Armadillo Repeat Containing Protein | At5g66200 | Armadillo/Beta-Catenin Repeat Family Protein                                            | 0.2858 | 4.3767 | 1 | 93.2450 | -0.4626 | -0.0223 |
| P0544H11.26 | Putative Cytochrome P450 Monooxygenase       | At2g26710 | BAS1 (PHYB ACTIVATION TAGGED SUPPRESSOR 1); Oxygen Binding                              | 0.3495 | 4.4158 | 1 | 92.3810 | -0.3448 | -0.0118 |
| P0554D10.26 | Bromelain-Like Thiol Protease                | At2g34080 | Cysteine Proteinase, Putative                                                           | 0.5383 | 4.0060 | 1 | 96.1990 | -0.3857 | -0.0420 |
| P0554F08.13 | Putative Peptidyl-Trna Hydrolase (PTH)       | At1g18440 | Peptidyl-Trna Hydrolase Family Protein                                                  | 0.2861 | 2.3858 | 1 | 47.7880 | -0.2877 | -0.0949 |
| P0554F08.4  | Putative P-Glycoprotein                      | At2g47000 | PGP4 (P-GLYCOPROTEIN 4, P-GLYCOPROTEIN 4); Atpase, Coupled To Transmembrane Movement Of | 0.2917 | 1.6845 | 1 | 60.0000 | -0.1311 | -0.0147 |



|                |                                            |           |                                                                         |        |        |   |         |         |         |
|----------------|--------------------------------------------|-----------|-------------------------------------------------------------------------|--------|--------|---|---------|---------|---------|
|                |                                            |           | Substances / Xenobiotic-Transporting Atpase                             |        |        |   |         |         |         |
| P0567H04.24    | Membrane Lipoprotein Lipid Attachment      | At5g54240 | Unknown Protein                                                         | 0.3881 | 4.0103 | 1 | 98.0840 | -0.3343 | -0.1095 |
| P0574F11.5     | Pentatricopeptide (PPR) Repeat-Containing  | At1g16480 | Pentatricopeptide (PPR) Repeat-Containing Protein                       | 0.7224 | 2.6175 | 1 | 52.5750 | -0.3679 | -0.0202 |
| P0576F08.31    | Hypothetical Protein                       | At5g17670 | Hydrolase                                                               | 0.2682 | 2.1029 | 1 | 58.1310 | -0.2049 | -0.0557 |
| P0583G08.11    | Putative Receptor-Like Kinase              | At4g33430 | BAK1 (BRI1-ASSOCIATED RECEPTOR KINASE); Kinase                          | 0.5368 | 2.3323 | 1 | 49.9010 | -0.1302 | -0.0530 |
| P0584E12.40-1  | Unknown Protein                            | At5g15880 | Unknown Protein                                                         | 0.4298 | 1.5720 | 1 | 52.2290 | -0.5154 | -0.0681 |
| P0599F09.21    | Putative Strictosidine Synthase            | At1g74000 | Ss3 (Strictosidine Synthase 3)                                          | 0.7736 | 4.1223 | 1 | 92.8570 | -0.3808 | -0.0706 |
| P0614D08.19    | Hypothetical Protein                       | At3g10140 | Reca Family Protein                                                     | 0.4280 | 1.5978 | 1 | 40.5510 | -0.3312 | -0.0349 |
| P0616D06.120   | Putative Ids-4 Protein                     | At2g45130 | SPX (SYG1/Pho81/XPR1) Domain-Containing Protein                         | 0.3648 | 3.7552 | 1 | 94.1180 | -0.3796 | -0.0824 |
| P0617H07.4     | Putative MRP-Like ABC Transporter          | At3g21250 | ATMRP6 (Arabidopsis Thaliana Multidrug Resistance-Associated Protein 6) | 0.3806 | 5.2207 | 1 | 72.1430 | -0.2428 | -0.0119 |
| P0620H05.3     | Putative Pentatricopeptide (PPR)           | At4g31850 | PGR3 (PROTON GRADIENT REGULATION 3); Binding                            | 0.9458 | 4.6054 | 1 | 57.1670 | -0.3725 | -0.0257 |
| P0625E02.103   | Putative Triacylglycerol Lipase            | At5g18640 | Lipase Class 3 Family Protein                                           | 0.3862 | 2.1351 | 1 | 43.8810 | -0.0890 | -0.0364 |
| P0625E02.108-2 | DNA Polymerase Zeta Catalytic Subunit-Like | At1g67500 | ATREV3 (Arabidopsis Thaliana Recovery Protein                           | 0.2958 | 3.3039 | 1 | 61.8710 | -0.2173 | -0.1493 |

|              |                                                |           |                                                                           |        |        |   |         |         |         |
|--------------|------------------------------------------------|-----------|---------------------------------------------------------------------------|--------|--------|---|---------|---------|---------|
|              |                                                |           | 3); DNA Binding                                                           |        |        |   |         |         |         |
| P0627E03.1   | Tetratricopeptide Repeat(TPR)-Containing       | At5g65160 | Tetratricopeptide Repeat (TPR)-Containing Protein                         | 0.3944 | 3.7497 | 1 | 90.5470 | -0.4410 | -0.0894 |
| P0627E03.18  | Putative Histidine-Trna Ligase                 | At3g46100 | ATHRS1 (HISTIDYL-TRNA SYNTHETASE 1); Histidine-Trna Ligase                | 0.3211 | 4.4335 | 1 | 49.5500 | -0.1437 | -0.0308 |
| P0627E03.20  | Disulfide Isomerase                            | At1g34780 | ATAPRL4 (APR-LIKE 4); Electron Carrier/ Protein Disulfide Oxidoreductase  | 0.4675 | 1.7954 | 1 | 48.1230 | -0.1838 | -0.0572 |
| P0643A10.51  | Putative Caleosin                              | At1g70670 | Caleosin-Related Family Protein                                           | 0.4615 | 2.6837 | 1 | 61.9510 | -0.1105 | -0.0217 |
| P0643F09.7   | Exoribonuclease-Like                           | At5g38890 | Exoribonuclease-Related                                                   | 0.2521 | 1.2540 | 1 | 58.4700 | -0.3258 | -0.0859 |
| P0654B04.5   | Putative Chloride Channel Protein              | At1g55620 | CLC-F (CHLORIDE CHANNEL F); Voltage-Gated Chloride Channel                | 0.3131 | 2.5397 | 1 | 44.4740 | -0.0289 | -0.0229 |
| P0665C04.3   | PHO85-Like Protein                             | At3g02040 | SRG3 (SENESCENCE-RELATED GENE 3); Glycerophosphodiester Phosphodiesterase | 0.4481 | 2.0401 | 1 | 55.9230 | -0.2035 | -0.0755 |
| P0666G10.106 | Putative Pentatricopeptide (PPR)               | At3g12770 | Pentatricopeptide (PPR) Repeat-Containing Protein                         | 0.7389 | 4.5351 | 1 | 42.9600 | -0.1521 | -0.0198 |
| P0669G09.17  | Unknown Protein                                | At1g56180 | Unknown Protein                                                           | 0.2832 | 1.7115 | 1 | 57.6270 | -0.3267 | -0.0363 |
| P0669G10.7   | Putative Glyoxalase I                          | At1g67280 | Lactoylglutathione Lyase, Putative / Glyoxalase I, Putative               | 0.1011 | 3.9967 | 1 | 77.7780 | -0.4079 | -0.0834 |
| P0671B11.20  | Putative 1-Aminocyclopropane-1-Carboxylic Acid | At4g26200 | ACS7 (1-Amino-Cyclopropane-1-Carboxylate Synthase 7); 1-Aminocyclopropane | 0.2668 | 4.2324 | 1 | 93.0180 | -0.4451 | -0.0605 |

|              |                                                 |           |                                                                                                                                                                                         |        |        |   |         |         |         |
|--------------|-------------------------------------------------|-----------|-----------------------------------------------------------------------------------------------------------------------------------------------------------------------------------------|--------|--------|---|---------|---------|---------|
|              |                                                 |           | ne-1-Carboxylate Synthase                                                                                                                                                               |        |        |   |         |         |         |
| P0671D01.4   | Hypothetical Protein                            | At3g12470 | Nucleic Acid Binding                                                                                                                                                                    | 0.7711 | 3.6192 | 1 | 92.3770 | -0.4800 | -0.1103 |
| P0671F11.27  | Putative 2-Oxoglutarate-Dependent Oxygenase     | At2g30830 | 2-Oxoglutarate-Dependent Dioxygenase, Putative                                                                                                                                          | 0.4939 | 4.1230 | 1 | 94.4290 | -0.4278 | -0.0226 |
| P0672D08.4   | Hypothetical Protein                            | At5g16520 | Unknown Protein                                                                                                                                                                         | 0.5278 | 2.6448 | 1 | 57.6170 | -0.2781 | -0.0372 |
| P0676H02.7   | Putative Ripening Regulated Protein DDTFR18     | At5g65380 | Ripening-Responsive Protein, Putative                                                                                                                                                   | 0.3788 | 2.1739 | 1 | 77.8970 | -0.5014 | -0.0402 |
| P0680F05.36  | Phosphate/Phosphoenolpyruvate Translocator      | At3g14410 | Transporter-Related                                                                                                                                                                     | 0.2895 | 2.8635 | 1 | 50.8930 | -0.1877 | -0.0477 |
| P0681F05.132 | Hypothetical Protein                            | At4g05220 | Harpin-Induced Protein-Related / HIN1-Related / Harpin-Responsive Protein-Related                                                                                                       | 0.5327 | 3.6284 | 1 | 97.9590 | -0.4051 | -0.1115 |
| P0683B11.27  | Hypothetical Protein                            | At3g12630 | Zinc Finger (AN1-Like) Family Protein                                                                                                                                                   | 0.5732 | 3.4184 | 1 | 91.4890 | -0.3491 | -0.1209 |
| P0683F02.6   | Putative 3-Deoxy-D-Manno-Octulosonic-Acid       | At5g03770 | 3-Deoxy-D-Manno-Octulosonic Acid Transferase-Related                                                                                                                                    | 0.4411 | 2.5213 | 1 | 49.5390 | -0.2339 | -0.0659 |
| P0684F11.21  | Putative Avr9/Cf-9 Rapidly Elicited Protein 231 | At1g70090 | GATL9/LGT8 (Galacturonosyltransferase-Like 9); Polygalacturonate 4-Alpha-Galacturonosyltransferase/Transferase, Transferring Glycosyl Groups / Transferase, Transferring Hexosyl Groups | 0.3923 | 4.1644 | 1 | 88.7640 | -0.2564 | -0.0440 |
| P0686H11.17  | Zinc Finger                                     | At2g04240 | XERIC0; Protein                                                                                                                                                                         | 0.6797 | 3.5189 | 1 | 97.5460 | -0.3094 | -0.1216 |

|              |                                            |           |                                                                                     |        |        |   |         |         |         |
|--------------|--------------------------------------------|-----------|-------------------------------------------------------------------------------------|--------|--------|---|---------|---------|---------|
|              | Protein Family-Like                        |           | Binding / Zinc Ion Binding                                                          |        |        |   |         |         |         |
| P0686H11.32  | Unknown Protein                            | At5g56050 | Unknown Protein                                                                     | 0.5488 | 3.8452 | 1 | 90.8700 | -0.3290 | -0.0358 |
| P0689E12.32  | Putative Energy Transfer Protein           | At3g20240 | Substrate Carrier Family Protein                                                    | 0.2827 | 1.7759 | 1 | 54.5710 | -0.4836 | -0.0447 |
| P0696F12.9   | Putative Serine/Threonine-Specific Protein | At4g38830 | Protein Kinase Family Protein                                                       | 0.7124 | 4.6063 | 1 | 63.0650 | -0.4643 | -0.0274 |
| P0698G06.3   | Putative Histone Acetyltransferase HAT B   | At5g56740 | Histone Acetyltransferase Family Protein                                            | 0.4736 | 1.5480 | 1 | 50.8120 | -0.4522 | -0.0322 |
| P0700F06.32  | Translation Initiation Factor IF-3-Like    | At2g24060 | Translation Initiation Factor 3 (IF-3) Family Protein                               | 0.3535 | 3.6323 | 1 | 39.1060 | 0.3236  | -0.0640 |
| P0701F11.30  | Zinc Finger (C3HC4-Type RING Finger)-Like  | At3g53690 | Zinc Finger (C3HC4-Type RING Finger) Family Protein                                 | 0.5632 | 3.7242 | 1 | 90.0500 | -0.3902 | -0.0819 |
| P0702F05.10  | Unknown Protein                            | At4g23850 | Long-Chain-Fatty-Acid--Coa Ligase / Long-Chain Acyl-Coa Synthetase                  | 0.2688 | 2.6951 | 1 | 42.9280 | 0.0326  | -0.0300 |
| P0702G08.13  | Unknown Protein                            | At5g46950 | Invertase/Pectin Methylesterase Inhibitor Family Protein                            | 1.3604 | 1.8347 | 1 | 94.2710 | -0.4451 | -0.0675 |
| P0705A05.133 | Putative SET1                              | At4g13460 | SUVH9 (SU(VAR)3-9 HOMOLOG 9); Histone-Lysine N-Methyltransferase / Zinc Ion Binding | 0.5581 | 4.4608 | 1 | 85.1920 | -0.5063 | -0.0148 |
| P0706E03.9   | Apospory-Associated Protein C-Like         | At5g66530 | Aldose 1-Epimerase Family Protein                                                   | 0.2601 | 4.0678 | 1 | 49.5050 | -0.0165 | -0.0257 |
| P0707D10.20  | Unknown Protein                            | At5g11320 | YUC4 (YUCCA4); Monooxygenase                                                        | 0.3370 | 4.3215 | 1 | 80.4690 | -0.4062 | -0.0441 |
| P0708B04.21  | Putative Senescence-Associated Protein     | At2g23810 | Tet8 (Tetraspanin8)                                                                 | 0.4196 | 3.9273 | 1 | 97.0590 | -0.4938 | -0.0679 |
| P0711F01.51  | ATP-Binding Cassette Transporter           | At3g47780 | ATATH6 (ABC2 Homolog 6); Atpase, Coupled                                            | 0.5324 | 2.2736 | 1 | 38.1760 | -0.1097 | -0.0225 |

|                  |                                                 |           |                                                                                   |        |        |   |         |         |         |
|------------------|-------------------------------------------------|-----------|-----------------------------------------------------------------------------------|--------|--------|---|---------|---------|---------|
|                  | Atabca1-Like                                    |           | To Transmembrane Movement Of Substances                                           |        |        |   |         |         |         |
| PPR683           | Hypothetical Protein                            | At1g63130 | Pentatricopeptide (PPR) Repeat-Containing Protein                                 | 0.8473 | 3.0009 | 1 | 45.5400 | -0.2258 | -0.0341 |
| PPR762           | Hypothetical Protein                            | At1g62910 | Pentatricopeptide (PPR) Repeat-Containing Protein                                 | 0.7729 | 4.1928 | 1 | 50.2080 | -0.3626 | -0.0290 |
| B1120F06.107     | Unknown Protein                                 | At1g24310 | Hypothetical Protein                                                              | 0.3525 | 2.1657 | 3 | 60.2600 | -0.3295 | -0.0268 |
| B1130G10.10      | Putative Protein Kinase                         | At1g52290 | Protein Kinase Family Protein                                                     | 0.4517 | 3.9628 | 3 | 78.9300 | -0.4641 | -0.0675 |
| B1130G10.4       | Hypothetical Protein                            | At5g46020 | Unknown Protein                                                                   | 0.2161 | 3.4128 | 3 | 49.3060 | -0.4935 | -0.1110 |
| B1143G03.3       | Hypothetical Protein                            | At5g42410 | Auxin-Responsive Family Protein                                                   | 0.8507 | 3.2963 | 3 | 84.9060 | -0.2978 | -0.1523 |
| OJ1001_D02.30    | Pentatricopeptide (PPR) Repeat-Containing       | At5g39350 | Pentatricopeptide (PPR) Repeat-Containing Protein                                 | 0.5998 | 1.9176 | 3 | 62.6960 | -0.3983 | -0.0169 |
| OJ1005_D12.35    | Unknown Protein                                 | At4g33590 | Hypothetical Protein                                                              | 0.5292 | 4.2818 | 3 | 94.5880 | -0.3473 | -0.0365 |
| OJ1007_D04.17    | Putative Anthranilate Phosphoribosyltransferase | At1g70570 | Anthranilate Phosphoribosyltransferase, Putative                                  | 0.2197 | 4.8227 | 3 | 49.1620 | 0.0356  | -0.0455 |
| OJ1058_A12.128-2 | Contains EST(S): D22146(C10415)                 | At4g04500 | Protein Kinase Family Protein                                                     | 0.7759 | 1.9659 | 3 | 64.8370 | -0.2772 | -0.0286 |
| OJ1112_G03.18    | Unknown Protein                                 | At5g23850 | Unknown Protein                                                                   | 0.2688 | 4.1151 | 3 | 59.4900 | -0.2643 | -0.0603 |
| OJ1115_A05.12-1  | Putative RCH2 Protein                           | At3g21670 | Nitrate Transporter (NTP3)                                                        | 0.3310 | 4.5266 | 3 | 95.9040 | -0.4463 | -0.0338 |
| OJ1118_C04.7     | Putative SMC Protein                            | At5g48600 | ATSMC3 (Arabidopsis Thaliana Structural Maintenance Of Chromosome 3); ATP Binding | 0.2194 | 5.0077 | 3 | 39.8370 | 0.1103  | -0.0231 |
| OJ1123_G09.2     | Hypothetical                                    | At5g19020 | Pentatricopeptide                                                                 | 0.5459 | 4.6292 | 3 | 53.5140 | -0.3468 | -0.0139 |

|                 |                                                     |           |                                                                                                      |        |        |   |         |         |         |
|-----------------|-----------------------------------------------------|-----------|------------------------------------------------------------------------------------------------------|--------|--------|---|---------|---------|---------|
| 1               | Protein                                             |           | (PPR) Repeat-Containing Protein                                                                      |        |        |   |         |         |         |
| OJ1124_D06.17   | Pentatricopeptide Repeat-Containing                 | At5g48910 | Pentatricopeptide (PPR) Repeat-Containing Protein                                                    | 0.7083 | 4.3994 | 3 | 95.7540 | -0.4440 | -0.0518 |
| OJ1134F05.20    | Hypothetical Protein                                | At2g48000 | Pentatricopeptide (PPR) Repeat-Containing Protein                                                    | 1.3081 | 1.8544 | 3 | 53.8670 | -0.2206 | -0.0738 |
| OJ1177_E11.3    | Putative Oxysterol Binding Protein                  | At4g22540 | Oxysterol Binding                                                                                    | 0.3898 | 4.6633 | 3 | 53.4020 | -0.1002 | -0.0187 |
| OJ1200_C08.105  | Carbonyl Reductase -Like Protein                    | At2g24190 | Short-Chain Dehydrogenase/Reductase (SDR) Family Protein                                             | 0.4600 | 4.0531 | 3 | 57.1430 | -0.1477 | -0.0416 |
| OJ1261C08.11    | Hypothetical Protein                                | At2g39710 | Aspartyl Protease Family Protein                                                                     | 0.4533 | 4.3068 | 3 | 93.6770 | -0.3060 | -0.0432 |
| OJ1282_E10.12-2 | Putative Na <sup>+</sup> /H <sup>+</sup> Antiporter | At2g31910 | Atchx21 (Cation/H <sup>+</sup> Exchanger 21)                                                         | 0.8865 | 4.6575 | 3 | 92.5100 | -0.4363 | -0.0172 |
| OJ1282_E10.7    | Pentatricopeptide (PPR) Repeat-Containing           | At2g27610 | Pentatricopeptide (PPR) Repeat-Containing Protein                                                    | 0.9545 | 4.6821 | 3 | 84.8350 | -0.4448 | -0.0264 |
| OJ1343_B12.129  | Putative Kinetochores Protein                       | At1g20140 | ASK4 (ARABIDOPSIS SKP1-LIKE 4); Ubiquitin-Protein Ligase                                             | 0.3149 | 3.2944 | 3 | 88.4620 | -0.3027 | -0.0895 |
| OJ1351_C05.110  | S-Receptor Kinase PK3 Precursor-Like Protein        | At1g67000 | Kinase                                                                                               | 0.7942 | 4.2827 | 3 | 87.2040 | -0.3680 | -0.0164 |
| OJ1372_D12.114  | Putative PDR-Like ABC Transporter                   | At2g36380 | ATPDR6/PDR6 (PLEIOTROPIC DRUG RESISTANCE 6); Atpase, Coupled To Transmembrane Movement Of Substances | 0.3186 | 2.4556 | 3 | 48.2560 | -0.1318 | -0.0214 |
| OJ1414_E05.8    | Putative                                            | At5g46240 | KAT1 (K <sup>+</sup> Atpase                                                                          | 0.2719 | 3.1662 | 3 | 76.4450 | -0.3829 | -0.0313 |

|                  |                                                 |           |                                                                                         |        |        |   |         |         |         |
|------------------|-------------------------------------------------|-----------|-----------------------------------------------------------------------------------------|--------|--------|---|---------|---------|---------|
|                  | Potassium Channel                               |           | 1); Cyclic Nucleotide Binding / Inward Rectifier Potassium Channel                      |        |        |   |         |         |         |
| OJ1477_F01.124   | Putative Condensin Subunit 1                    | At3g57060 | Binding                                                                                 | 0.2889 | 2.6931 | 3 | 40.5890 | 0.0268  | -0.0162 |
| OJ1611_C08.25    | Universal Stress Protein / Early Nodulin        | At3g03270 | Universal Stress Protein (USP) Family Protein / Early Nodulin ENOD18 Family Protein     | 0.3452 | 1.8193 | 3 | 62.1790 | -0.2463 | -0.1121 |
| OJ1655_B12.16    | Leaf Senescence Protein-Like                    | At5g64020 | Hypothetical Protein                                                                    | 0.3087 | 2.9214 | 3 | 38.8590 | 0.1820  | -0.0274 |
| OJ1785_A05.14    | Putative Pentatricopeptide Repeat Containing    | At3g24000 | Pentatricopeptide (PPR) Repeat-Containing Protein                                       | 0.6830 | 2.7939 | 3 | 56.3110 | -0.4516 | -0.0058 |
| OJ1789_C07.21    | Putative Microtubule-Associated Protein         | At1g27920 | Microtubule Associated Protein (MAP65/ASE1) Family Protein                              | 0.4221 | 2.0963 | 3 | 42.6230 | 0.1610  | -0.0254 |
| OJ1793_E11.105   | Putative 5-Alpha-Taxadienol-10-Beta-Hydroxylase | At5g36110 | CYP716A1 (Cytochrome P450, Family 716, Subfamily A, Polypeptide 1); Oxygen Binding      | 0.6980 | 3.8609 | 3 | 56.7630 | -0.2165 | -0.0065 |
| OJ2056_H01.9     | Unknown Protein                                 | At5g19630 | Hypothetical Protein                                                                    | 0.3080 | 1.8037 | 3 | 70.5610 | -0.4396 | -0.0525 |
| OSJNBa0009K15.12 | Unknown Protein                                 | At3g51970 | Long-Chain-Alcohol O-Fatty-Acyltransferase Family Protein / Wax Synthase Family Protein | 0.6762 | 4.0864 | 3 | 91.5660 | -0.3875 | -0.0459 |
| OSJNBa0011F23.7  | Unknown Protein                                 | At1g73110 | Ribulose Bisphosphate Carboxylase/Oxygenase Activase, Putative / Rubisco                | 0.2290 | 3.1429 | 3 | 52.4270 | -0.0222 | -0.0236 |

|                        |                                                      |           |                                                                                              |        |        |   |         |         |         |
|------------------------|------------------------------------------------------|-----------|----------------------------------------------------------------------------------------------|--------|--------|---|---------|---------|---------|
|                        |                                                      |           | Activase, Putative                                                                           |        |        |   |         |         |         |
| OSJNBa0011L<br>07.13   | Unknown Protein                                      | At3g58690 | Protein Kinase<br>Family Protein                                                             | 0.8462 | 4.2227 | 3 | 90.5880 | -0.3973 | -0.0535 |
| OSJNBa0019D<br>11.15   | Unknown Protein                                      | At3g62470 | Pentatricopeptide<br>(PPR) Repeat-<br>Containing<br>Protein                                  | 0.9104 | 4.2505 | 3 | 78.3720 | -0.5512 | -0.0448 |
| OSJNBa0029C<br>04.10   | Unknown Protein                                      | At2g13000 | Transposable<br>Element Gene                                                                 | 0.7641 | 4.7261 | 3 | 48.5290 | 0.2625  | -0.0071 |
| OSJNBa0032F<br>06.15   | Unknown Protein                                      | At1g63220 | C2 Domain-<br>Containing<br>Protein                                                          | 0.3412 | 1.7293 | 3 | 69.2310 | -0.3099 | -0.1166 |
| OSJNBa0032G<br>11.10   | Putative Methyl<br>Chloride<br>Transferase           | At2g43910 | Thiol<br>Methyltransferase<br>, Putative                                                     | 0.5013 | 1.9168 | 3 | 77.6820 | -0.2582 | -0.1114 |
| OSJNBa0032G<br>11.16   | Putative B'<br>Regulatory<br>Subunit Of<br>Protein   | At3g26020 | Protein<br>Phosphatase<br>Type 2A<br>Regulator                                               | 0.2468 | 4.4352 | 3 | 47.7990 | 0.0607  | -0.0232 |
| OSJNBa0035M<br>09.11   | Unknown Protein                                      | At2g15410 | Transposable<br>Element Gene                                                                 | 0.7111 | 2.0439 | 3 | 63.7840 | -0.5432 | -0.0279 |
| OSJNBa0035M<br>09.16   | Unknown Protein                                      | At5g10620 | Unknown Protein                                                                              | 0.2793 | 1.9371 | 3 | 48.2760 | -0.2502 | -0.0690 |
| OSJNBa0035O<br>13.14   | Unknown Protein                                      | At3g62700 | ATMRP10<br>(Arabidopsis<br>Thaliana<br>Multidrug<br>Resistance-<br>Associated<br>Protein 10) | 0.3956 | 2.1275 | 3 | 59.9590 | -0.3867 | -0.0129 |
| OSJNBa0038P<br>21.9    | Unknown Protein                                      | At5g14770 | Pentatricopeptide<br>(PPR) Repeat-<br>Containing<br>Protein                                  | 1.0488 | 3.2343 | 3 | 55.6270 | -0.4480 | -0.0175 |
| OSJNBa0041P<br>03.13   | Putative<br>Chloroplast RNA<br>Processing<br>Protein | At1g12300 | Pentatricopeptide<br>(PPR) Repeat-<br>Containing<br>Protein                                  | 0.7779 | 4.3344 | 3 | 57.8230 | -0.3250 | -0.0612 |
| OSJNBa0042H<br>24.55-2 | Leucine-Rich<br>Repeat Protein<br>Kinase-Like        | At1g51860 | Leucine-Rich<br>Repeat Protein<br>Kinase, Putative                                           | 0.5221 | 4.1025 | 3 | 36.3890 | 0.1355  | -0.0274 |
| OSJNBa0043L<br>24.12   | Unknown Protein                                      | At1g23360 | Ubie/COQ5<br>Methyltransferase<br>Family Protein                                             | 0.3155 | 1.6455 | 3 | 57.5880 | -0.2614 | -0.0985 |
| OSJNBa0048K<br>16.23   | Putative UDP-<br>Glycosyltransfera                   | At1g22400 | UGT85A1 (UDP-<br>Glucosyl                                                                    | 0.5056 | 4.3534 | 3 | 88.6270 | -0.4071 | -0.0336 |



|                  |                                            |           |                                                                                                                                  |        |        |   |         |         |         |
|------------------|--------------------------------------------|-----------|----------------------------------------------------------------------------------------------------------------------------------|--------|--------|---|---------|---------|---------|
|                  | se                                         |           | Transferase 85A1); UDP-Glycosyltransferase/ Transferase, Transferring Glycosyl Groups / Transferase, Transferring Hexosyl Groups |        |        |   |         |         |         |
| OSJNBa0049O12.9  | Hypothetical Protein                       | At5g60700 | Glycosyltransferase Family Protein 2                                                                                             | 0.2118 | 4.7708 | 3 | 97.0850 | -0.4885 | -0.0176 |
| OSJNBa0052K01.23 | Putative Flap Endonuclease 1               | At5g26675 | Unknown Protein                                                                                                                  | 0.1147 | 2.9234 | 3 | 46.0640 | -0.0094 | -0.0400 |
| OSJNBa0052O21.15 | Unknown Protein                            | At1g05680 | UDP-Glucuronosyl/UDP-Glucosyl Transferase Family Protein                                                                         | 0.6383 | 2.1295 | 3 | 77.1170 | -0.2696 | -0.0528 |
| OSJNBa0053L11.32 | Putative LEUNIG                            | At2g32700 | WD-40 Repeat Family Protein                                                                                                      | 0.2298 | 2.7809 | 3 | 42.2480 | 0.0412  | -0.0133 |
| OSJNBa0054K20.1  | Putative Pathogenesis-Related Protein PR-1 | At4g30320 | Allergen V5/Tpx-1-Related Family Protein                                                                                         | 0.3922 | 3.4798 | 3 | 93.4910 | -0.4502 | -0.0703 |
| OSJNBa0056E06.20 | Hypothetical Protein                       | At3g22540 | Unknown Protein                                                                                                                  | 0.2651 | 3.1321 | 3 | 76.6360 | -0.2861 | -0.1104 |
| OSJNBa0061G20.2  | Unknown Protein                            | At4g27210 | Transposable Element Gene                                                                                                        | 0.5512 | 4.4931 | 3 | 67.2970 | -0.4843 | -0.0269 |
| OSJNBa0063E14.35 | Putative 68 Kda Protein HP68               | At4g19210 | ATRLI2 (Arabidopsis Thaliana Rnase L Inhibitor Protein 2)                                                                        | 0.1993 | 4.5077 | 3 | 40.4220 | 0.0952  | -0.0281 |
| OSJNBa0064E16.9  | Putative Transaminase                      | At4g33680 | AGD2 (ABERRANT GROWTH AND DEATH 2); Transaminase                                                                                 | 0.3002 | 4.3597 | 3 | 75.9910 | -0.2198 | -0.0205 |
| OSJNBa0064H22.17 | Unknown Protein                            | At1g14140 | Substrate Carrier Family Protein                                                                                                 | 0.3079 | 1.6900 | 3 | 61.6670 | -0.2734 | -0.0893 |
| OSJNBa0064H22.6  | Unknown Protein                            | At2g02010 | Glutamate Decarboxylase, Putative                                                                                                | 0.2092 | 4.2869 | 3 | 95.4350 | -0.4777 | -0.0368 |
| OSJNBa0064M23.12 | Unknown Protein                            | At3g61460 | BRH1 (BRASSINOSTEROID-                                                                                                           | 0.8409 | 3.5471 | 3 | 90.9090 | -0.4150 | -0.1111 |

|                      |                                                |           |                                                                           |        |        |   |         |         |         |
|----------------------|------------------------------------------------|-----------|---------------------------------------------------------------------------|--------|--------|---|---------|---------|---------|
|                      |                                                |           | RESPONSIVE RING-H2); Protein Binding / Zinc Ion Binding                   |        |        |   |         |         |         |
| OSJNBa0067G<br>20.8  | Unknown Protein                                | At1g70080 | Terpene Synthase/Cyclase Family Protein                                   | 0.8017 | 1.5817 | 3 | 42.3910 | 0.0731  | -0.0178 |
| OSJNBa0069E<br>14.13 | Putative Dehydrogenase                         | At3g03980 | Short-Chain Dehydrogenase/Reductase (SDR) Family Protein                  | 0.4656 | 4.0237 | 3 | 97.2330 | -0.2339 | -0.0951 |
| OSJNBa0073A<br>21.31 | Putative High Affinity Potassium Transporter   | At4g10310 | HKT1 (HIGH-AFFINITY K <sup>+</sup> TRANSPORTER 1); Sodium Ion Transporter | 0.6445 | 2.7451 | 3 | 43.2490 | 0.0692  | -0.0096 |
| OSJNBa0078A<br>17.13 | Putative Transposase                           | At4g38180 | FRS5 (FAR1-RELATED SEQUENCE 5); Zinc Ion Binding                          | 0.6545 | 2.5694 | 3 | 38.9680 | 0.2398  | -0.0139 |
| OSJNBa0078N<br>11.41 | Transitional Endoplasmic Reticulum Atpase-Like | At1g50140 | AAA-Type Atpase Family Protein                                            | 0.1887 | 4.3793 | 3 | 35.2400 | 0.0788  | -0.0260 |
| OSJNBa0087M<br>10.16 | Putative Pentatricopeptide Repeat Protein      | At3g53700 | MEE40 (Maternal Effect Embryo Arrest 40); Binding                         | 0.4150 | 4.7031 | 3 | 53.1700 | -0.4261 | -0.0276 |
| OSJNBa0092M<br>19.3  | Hypothetical Protein                           | At4g16010 | Transposable Element Gene                                                 | 1.2735 | 3.1324 | 3 | 52.9410 | 0.0650  | -0.1250 |
| OSJNBa0096I<br>6.33  | Putative Hydroxysteroid dehydrogenase          | At3g29260 | Short-Chain Dehydrogenase/Reductase (SDR) Family Protein                  | 0.4120 | 3.9864 | 3 | 97.3780 | -0.2893 | -0.0529 |
| OSJNBb0004A<br>17.12 | Unknown Protein                                | At1g10820 | Unknown Protein                                                           | 0.8018 | 2.3228 | 3 | 58.6090 | -0.1236 | -0.0601 |
| OSJNBb0008D<br>07.22 | Hypothetical Protein, Similar To <i>Oryza</i>  | At5g27370 | Unknown Protein                                                           | 0.5725 | 3.5517 | 3 | 88.9910 | -0.3835 | -0.0511 |
| OSJNBb0011A<br>08.1  | Putative Rnase                                 | At3g01410 | Rnase H Domain-Containing Protein                                         | 0.5446 | 3.9029 | 3 | 40.5200 | -0.0313 | -0.0561 |
| OSJNBb0011H<br>13.18 | Putative P-Type Atpase                         | At1g10130 | ECA3 (ENDOPLASMIC RETICULUM-TYPE CALCIUM-                                 | 0.1643 | 2.1934 | 3 | 37.1630 | 0.1023  | -0.0143 |

|                       |                                            |           |                                                                                                           |        |        |   |         |         |         |
|-----------------------|--------------------------------------------|-----------|-----------------------------------------------------------------------------------------------------------|--------|--------|---|---------|---------|---------|
|                       |                                            |           | TRANSPORTING ATPASE 3); Calcium-Transporting Atpase/ Calmodulin Binding                                   |        |        |   |         |         |         |
| OSJNBb0012J1<br>0.18  | Putative ADH Glutamate Dehydrogenase       | At5g07440 | GDH2 (GLUTAMATE DEHYDROGENASE 2); Oxidoreductase                                                          | 0.1299 | 3.2190 | 3 | 51.8130 | -0.2238 | -0.0589 |
| OSJNBb0017F<br>17.22  | Putative ABC Transporter                   | At2g40090 | ATATH9 (ABC2 Homolog 9)                                                                                   | 0.3149 | 2.4366 | 3 | 48.6060 | -0.1641 | -0.0568 |
| OSJNBb0032D<br>24.14  | Unknown Protein                            | At3g15310 | Transposable Element Gene                                                                                 | 0.4741 | 4.1066 | 3 | 34.8450 | 0.3295  | -0.0216 |
| OSJNBb0041A<br>22.4   | Unknown Protein                            | At2g35030 | Pentatricopeptide (PPR) Repeat-Containing Protein                                                         | 0.6934 | 4.5286 | 3 | 52.5980 | -0.1280 | -0.0248 |
| OSJNBb0048A<br>17.4   | Putative Cytochrome P450                   | At4g37320 | CYP81D5 (Cytochrome P450, Family 81, Subfamily D, Polypeptide 5); Oxygen Binding                          | 0.5757 | 2.0872 | 3 | 74.6450 | -0.3996 | -0.0102 |
| OSJNBb0050O<br>03.5   | Unknown Protein                            | At1g24470 | Short-Chain Dehydrogenase/Reductase (SDR) Family Protein                                                  | 0.6275 | 4.0481 | 3 | 94.1370 | -0.4774 | -0.0928 |
| OSJNBb0055I2<br>4.101 | Leaf Senescence Related Protein-Like       | At2g14530 | Unknown Protein                                                                                           | 0.3338 | 1.7281 | 3 | 59.1370 | -0.1939 | -0.0729 |
| OSJNBb0067H<br>15.19  | Unknown Protein, Contains BURP Domain,     | At5g25610 | Rd22 (Responsive To Dessication 22)                                                                       | 0.4791 | 3.7247 | 3 | 96.0350 | -0.3006 | -0.0552 |
| OSJNBb0070O<br>09.3   | Putative Protein Phosphatase 2A Regulatory | At3g09880 | ATB' BETA (Arabidopsis Thaliana Serine/Threonine Protein Phosphatase 2A 55 Kda Regulatory Subunit B Prime | 0.2614 | 4.4141 | 3 | 77.5550 | -0.4695 | -0.0404 |

|                  |                                              |           |                                                                                    |        |        |   |         |         |         |
|------------------|----------------------------------------------|-----------|------------------------------------------------------------------------------------|--------|--------|---|---------|---------|---------|
|                  |                                              |           | Beta); Protein Phosphatase Type 2A Regulator                                       |        |        |   |         |         |         |
| OSJNBb0108E17.14 | Unknown Protein                              | At3g04820 | Pseudouridylate Synthase                                                           | 0.4093 | 2.7146 | 3 | 50.3980 | 0.0739  | -0.0573 |
| P0019E03.1       | Putative Purine Permease                     | At1g30840 | ATPUP4 (Arabidopsis Thaliana Purine Permease 4); Purine Transporter                | 0.4735 | 4.1321 | 3 | 95.6160 | -0.3167 | -0.0952 |
| P0030H07.20      | Putative Aspartate--Trna Ligase              | At4g33760 | Trna Synthetase Class II (D, K And N) Family Protein                               | 0.2854 | 2.0541 | 3 | 46.3700 | -0.1510 | -0.0108 |
| P0042A10.14      | Hypothetical Protein                         | At1g26310 | CAL (CAULIFLOWER); DNA Binding / Transcription Factor                              | 0.6855 | 3.4737 | 3 | 84.7460 | -0.5213 | -0.0495 |
| P0406G08.10      | Laccase                                      | At5g60020 | LAC17 (Laccase 17); Copper Ion Binding / Oxidoreductase                            | 0.2231 | 4.5083 | 3 | 92.1570 | -0.4861 | -0.0177 |
| P0409B11.10      | Putative Phosphoadenylyl-Sulfate Reductase   | At1g62180 | Apr2 (5'adenylylphosphosulfate Reductase 2)                                        | 0.2538 | 4.3683 | 3 | 95.7490 | -0.4706 | -0.0234 |
| P0432B10.6       | Putative 60S Ribosomal Protein L30           | At1g36240 | 60S Ribosomal Protein L30 (RPL30A)                                                 | 0.1857 | 2.0897 | 3 | 62.8570 | -0.6494 | -0.1000 |
| P0439E07.15      | Putative Pectin Methylesterase               | At5g19730 | Pectinesterase Family Protein                                                      | 0.2874 | 4.1362 | 3 | 93.4960 | -0.3322 | -0.0690 |
| P0450B04.1       | Putative P450                                | At2g30770 | CYP71A13 (Cytochrome P450, Family 71, Subfamily A, Polypeptide 13); Oxygen Binding | 0.7084 | 2.6279 | 3 | 64.1300 | -0.4171 | -0.0477 |
| P0458G06.122     | Leaf Senescence Related Protein-Like Protein | At4g01080 | Unknown Protein                                                                    | 0.8621 | 4.2630 | 3 | 89.5730 | -0.3290 | -0.0275 |
| P0462E11.12      | Putative (+)-Delta-Cadinene Sythase          | At3g14490 | Terpene Synthase/Cyclase Family Protein                                            | 0.7065 | 4.2978 | 3 | 35.4460 | 0.4640  | -0.0201 |

|              |                                                 |           |                                                                                 |        |        |   |         |         |         |
|--------------|-------------------------------------------------|-----------|---------------------------------------------------------------------------------|--------|--------|---|---------|---------|---------|
| P0470D12.145 | SKP1(S-Phase Kinase Associated Protein)         | At4g29370 | Kelch Repeat-Containing F-Box Family Protein                                    | 1.1023 | 4.2507 | 3 | 80.8220 | -0.4787 | -0.0327 |
| P0489A05.5   | Putative MADS-Box Protein                       | At2g42830 | SHP2 (SHATTERPROOF 2); Transcription Factor                                     | 0.3080 | 3.7701 | 3 | 65.2170 | -0.4327 | -0.0287 |
| P0496H05.25  | Putative Peptidylprolyl Isomerase               | At5g48570 | Peptidyl-Prolyl Cis-Trans Isomerase, Putative / FK506-Binding Protein, Putative | 0.6512 | 2.4098 | 3 | 49.0870 | -0.0756 | -0.0266 |
| P0497A05.18  | Proline Transport Protein-Like                  | At2g39890 | Prot1 (PROLINE TRANSPORTER 1)                                                   | 0.6254 | 4.3898 | 3 | 86.8180 | -0.4570 | -0.0506 |
| P0498H04.26  | Putative GDSL-Motif Lipase/Hydrolase Protein    | At1g29670 | GDSL-Motif Lipase/Hydrolase Family Protein                                      | 0.4624 | 4.1251 | 3 | 93.5140 | -0.3526 | -0.0483 |
| P0520B06.15  | Putative TATA Binding Protein-Associated Factor | At1g04950 | TAFII59 (TATA Box Associated Factor II 59); Transcription Initiation Factor     | 0.3291 | 1.8677 | 3 | 46.2890 | -0.0922 | -0.0250 |
| P0552F09.104 | Disease Resistance Response Protein-Like        | At5g42500 | Disease Resistance-Responsive Family Protein                                    | 0.7883 | 3.5662 | 3 | 94.5780 | -0.3593 | -0.0931 |
| P0556A11.20  | Putative KH Domain Protein                      | At5g46190 | KH Domain-Containing Protein                                                    | 0.4177 | 4.2426 | 3 | 33.9710 | -0.1440 | -0.0229 |
| P0582D05.138 | Putative Pentatricopeptide (PPR)                | At1g53600 | Pentatricopeptide (PPR) Repeat-Containing Protein                               | 0.5181 | 3.1832 | 3 | 55.9190 | -0.2313 | -0.0380 |
| P0594D10.128 | Putative Alcohol Dehydrogenase                  | At1g22440 | Alcohol Dehydrogenase, Putative                                                 | 0.3377 | 4.2273 | 3 | 83.7020 | -0.4877 | -0.0492 |
| P0610E02.28  | Hypothetical Protein                            | At1g50660 | Unknown Protein                                                                 | 0.6467 | 3.0839 | 3 | 59.9660 | -0.2673 | -0.0153 |
| P0616D06.103 | Putative Exportin, Trna                         | At1g72560 | Psd (Paused)                                                                    | 0.4658 | 2.6306 | 3 | 58.0260 | -0.2557 | -0.0208 |
| P0643F09.13  | Haloacid Dehalogenase-                          | At2g33250 | Unknown Protein                                                                 | 0.3170 | 3.8673 | 3 | 64.5160 | -0.3765 | -0.1130 |

|               |                                          |           |                                                                                                                                                  |        |        |   |         |         |         |
|---------------|------------------------------------------|-----------|--------------------------------------------------------------------------------------------------------------------------------------------------|--------|--------|---|---------|---------|---------|
|               | Like Hydrolase-Like                      |           |                                                                                                                                                  |        |        |   |         |         |         |
| P0660F12.24   | Unknown Protein                          | At2g01170 | Amino Acid Permease Family Protein                                                                                                               | 0.2976 | 2.3526 | 3 | 78.1680 | -0.4085 | -0.0342 |
| P0663C08.2    | Unknown Protein                          | At5g28540 | Luminal Binding Protein 1 (Bip-1) (BP1)                                                                                                          | 0.6617 | 4.2441 | 3 | 85.8510 | -0.5413 | -0.0540 |
| P0665D10.14   | Unknown Protein                          | At5g04560 | Encodes A DNA Glycosylase DEMETER (DME)                                                                                                          | 0.2309 | 1.9326 | 3 | 30.7090 | 0.3743  | -0.0237 |
| P0680F05.51   | Putative 33-Kda Secretory Protein        | At1g63600 | Protein Kinase-Related                                                                                                                           | 0.9326 | 3.9181 | 3 | 74.7250 | -0.2692 | -0.0493 |
| P0681F05.120  | Putative ATP/GTP-Binding Protein         | At4g21210 | Encodes A PPK Regulatory Protein That Has Both Protein Kinase And Protein Phosphatase Activities Towards PPK (Pyruvate Orthophosphate Dikinase). | 0.3471 | 3.0758 | 3 | 60.0000 | -0.3437 | -0.0410 |
| P0700F06.15-1 | Zinc Finger (CCCH-Type) Protein-Like     | At2g24830 | Zinc Finger (CCCH-Type) Family Protein / D111/G-Patch Domain-Containing Protein                                                                  | 0.3522 | 2.1380 | 3 | 41.8710 | -0.1662 | -0.0208 |
| P0711F01.41   | Putative FAE1                            | At4g34510 | KCS2 (3-Ketoacyl-Coa Synthase 2); Acyltransferase                                                                                                | 0.6034 | 4.3074 | 3 | 89.2470 | -0.3336 | -0.0367 |
| P0724B10.43   | Hydrolase, Alpha/Beta Fold Family-Like   | At4g36530 | Hydrolase, Alpha/Beta Fold Family Protein                                                                                                        | 0.3217 | 4.2614 | 3 | 86.6320 | -0.4007 | -0.0590 |
| B1060H01.29   | Putative 8-Amino-7-Oxononanoate Synthase | At5g04620 | ATBIOF; 8-Amino-7-Oxononanoate Synthase/ Transaminase                                                                                            | 0.3371 | 2.7422 | 4 | 45.6310 | -0.1125 | -0.0445 |
| OJ1003C07.7   | Putative Myo-Inositol-1-                 | At2g22240 | Inositol-3-Phosphate                                                                                                                             | 0.1125 | 4.3880 | 4 | 87.6570 | -0.5150 | -0.0363 |

|                  |                                              |           |                                                                                                          |        |        |   |         |         |         |
|------------------|----------------------------------------------|-----------|----------------------------------------------------------------------------------------------------------|--------|--------|---|---------|---------|---------|
|                  | Phosphate Synthase                           |           | Synthase Isozyme 2 / Myo-Inositol-1-Phosphate Synthase 2 / MI-1-P Synthase 2 / IPS 2                     |        |        |   |         |         |         |
| OJ1112_F06.15    | Zinc Finger And C2 Domain Protein-Like       | At1g48590 | C2 Domain-Containing Protein                                                                             | 0.4489 | 3.4760 | 4 | 84.0760 | -0.4016 | -0.1163 |
| OJ1214_E03.15    | Unknown Protein                              | At1g28380 | Nsl1 (Necrotic Spotted Lesions 1)                                                                        | 0.4405 | 4.6047 | 4 | 79.5680 | -0.3992 | -0.0096 |
| OJ1435_F07.30    | Putative Nodulin Mtn21                       | At4g01440 | Nodulin Mtn21 Family Protein                                                                             | 0.5549 | 2.6334 | 4 | 55.4250 | -0.1208 | -0.0374 |
| OJ1499_D04.8     | Putative Leucine-Rich Repeat Receptor Kinase | At4g39270 | Leucine-Rich Repeat Transmembrane Protein Kinase, Putative                                               | 0.6136 | 2.4230 | 4 | 58.7010 | -0.2828 | -0.0158 |
| OJ1705B08.7      | Putative Peroxidase                          | At1g05260 | RCI3 (RARE COLD INDUCIBLE GENE 3); Peroxidase                                                            | 0.5211 | 4.1006 | 4 | 85.7590 | -0.3683 | -0.0444 |
| OJ9003_G05.21    | Putative SNF2 Domain-Containing Protein      | At3g54280 | ATP Binding / DNA Binding / Helicase                                                                     | 0.3138 | 2.4169 | 4 | 36.4430 | 0.0509  | -0.0064 |
| OSJNBa0003O19.10 | Putative Enoyl-Coa-Hydratase                 | At5g65940 | Chy1 (Beta-Hydroxyisobutyryl-Coa Hydrolase 1)                                                            | 0.2740 | 2.3934 | 4 | 37.3490 | 0.1424  | -0.1098 |
| OSJNBa0004N05.8  | Unknown Protein                              | At4g16480 | ATINT4 (INOSITOL TRANSPORTER 4); Carbohydrate Transporter/ Myo-Inositol:Hydrogen Symporter/ Sugar Porter | 0.2928 | 2.1772 | 4 | 73.5990 | -0.4689 | -0.0224 |
| OSJNBa0011K22.4  | Unknown Protein                              | At3g02740 | Aspartyl Protease Family Protein                                                                         | 0.5299 | 1.8691 | 4 | 43.3730 | 0.3516  | -0.0348 |
| OSJNBa0015J15.3  | Putative Trehalose-6-Phosphate Phosphatase   | At4g22590 | Trehalose-6-Phosphate Phosphatase, Putative                                                              | 0.3108 | 4.1612 | 4 | 43.1750 | -0.2541 | -0.0202 |
| OSJNBa0019K      | Unknown Protein                              | At4g25480 | DREB1A                                                                                                   | 0.5328 | 3.7057 | 4 | 91.0450 | -0.2750 | -0.0858 |

|                     |                                                 |           |                                                                                                   |        |        |   |         |         |         |
|---------------------|-------------------------------------------------|-----------|---------------------------------------------------------------------------------------------------|--------|--------|---|---------|---------|---------|
| 04.2                |                                                 |           | (DEHYDRATION RESPONSE ELEMENT B1A); DNA Binding / Transcription Factor/ Transcriptional Activator |        |        |   |         |         |         |
| OSJNBa0041M 21.2    | Unknown Protein                                 | At1g73040 | Jacalin Lectin Family Protein                                                                     | 0.9585 | 1.7759 | 4 | 53.0200 | -0.3439 | -0.1073 |
| OSJNBa0042H 24.55-1 | Serine/Threonine-Specific Receptor Protein      | At4g29990 | Light Repressible Receptor Protein Kinase                                                         | 0.6199 | 4.8359 | 4 | 41.3220 | 0.2891  | -0.0149 |
| OSJNBa0051D 19.17   | Putative Tam3-Transposase                       | At1g42110 | Transposable Element Gene; Hat-Like Transposase Family (Hobo/Ac/Tam3),                            | 0.7290 | 4.3342 | 4 | 34.3510 | -0.0631 | -0.0167 |
| OSJNBa0053E 05.18   | Putative ATP-Dependent Clp Protease Subunit     | At1g33360 | ATP-Dependent Clp Protease ATP-Binding Subunit Clpx, Putative                                     | 0.3221 | 4.1807 | 4 | 36.2670 | 0.2343  | -0.0355 |
| OSJNBa0061E 21.10   | Chloroplast RNA Processing Protein-Like Protein | At5g55840 | Pentatricopeptide (PPR) Repeat-Containing Protein                                                 | 1.0606 | 4.6601 | 4 | 51.0990 | -0.0375 | -0.0153 |
| OSJNBa0087C 10.22   | Unknown Protein                                 | At5g23330 | Riboflavin Biosynthesis Protein-Related                                                           | 0.4760 | 4.1647 | 4 | 39.1980 | 0.1040  | -0.0226 |
| OSJNBa0087G 11.19   | Putative 1,3-Beta-Glucanase                     | At5g20870 | Glycosyl Hydrolase Family 17 Protein                                                              | 0.3559 | 4.3104 | 4 | 97.7180 | -0.4538 | -0.0465 |
| OSJNBa0091C 18.39   | Hypothetical Protein                            | At5g25790 | Transcription Factor                                                                              | 0.9292 | 2.9679 | 4 | 39.5350 | 0.0585  | -0.0482 |
| OSJNBa0092M 19.27   | Putative Vacuolar Protein Sorting-Associated    | At5g53530 | Vacuolar Protein Sorting-Associated Protein 26, Putative / VPS26, Putative                        | 0.2466 | 3.3884 | 4 | 39.4960 | -0.0642 | -0.1238 |
| OSJNBb0006L 01.7    | Unknown Protein                                 | At1g59520 | Cw7                                                                                               | 0.3514 | 1.9920 | 4 | 38.8450 | 0.1749  | -0.0462 |
| OSJNBb0012A 20.13   | Unknown Protein                                 | At1g52200 | Unknown Protein                                                                                   | 0.7704 | 3.5258 | 4 | 86.5380 | -0.2890 | -0.1193 |



|                  |                                                |           |                                                                                           |        |        |   |         |         |         |
|------------------|------------------------------------------------|-----------|-------------------------------------------------------------------------------------------|--------|--------|---|---------|---------|---------|
| OSJNBb0013K08.9  | Putative Nucleotide-Binding Protein            | At4g19540 | Unknown Protein                                                                           | 0.2837 | 1.0864 | 4 | 44.4040 | -0.2397 | -0.0531 |
| OSJNBb0038F20.4  | Putative NTGP4                                 | At1g33970 | GTP Binding                                                                               | 0.4886 | 1.6737 | 4 | 40.8160 | -0.1734 | -0.0364 |
| OSJNBb0051N19.2  | Unknown Protein                                | At2g23000 | SCPL10 (Serine Carboxypeptidase-Like 10); Serine Carboxypeptidase                         | 0.4658 | 1.9413 | 4 | 54.1760 | -0.2370 | -0.0463 |
| OSJNBb0073N24.11 | Putative Hypersensitivity-Related (Hsr)Protein | At5g17540 | Transferase Family Protein                                                                | 0.3893 | 4.3194 | 4 | 95.5850 | -0.4116 | -0.0345 |
| OSJNBb0094O03.14 | Putative Kinesin-Like Protein                  | At3g49650 | Kinesin Motor Protein-Related                                                             | 0.3355 | 4.7299 | 4 | 42.2430 | -0.2218 | -0.0278 |
| OSJNBb0103IO8.9  | Unknown Protein                                | At3g45270 | Transposable Element Gene                                                                 | 0.7196 | 3.2006 | 4 | 35.0880 | -0.0329 | -0.1114 |
| P0012A04.17      | Bola-Like Family Protein / Fe-S Metabolism     | At4g26500 | ATSUFE/CPSUF E/EMB1374 (EMBRYO DEFECTIVE 1374); Enzyme Activator/ Transcription Regulator | 0.5502 | 4.2255 | 4 | 80.3570 | -0.5093 | -0.0377 |
| P0035H10.13      | Putative Knotted1-Type Homeobox Protein        | At4g08150 | KNAT1 (BREVIPEDICELL US 1); Transcription Factor                                          | 0.5673 | 3.9221 | 4 | 83.4530 | -0.3630 | -0.0555 |
| P0042A10.6       | Similar To Phytochrome A Suppressor            | At1g53090 | SPA4 (SPA1-RELATED 4); Signal Transducer                                                  | 0.3885 | 4.7646 | 4 | 50.7340 | 0.1403  | -0.0292 |
| P0042A10.7       | Hypothetical Protein                           | At1g28290 | Pollen Ole E 1 Allergen And Extensin Family Protein                                       | 0.8329 | 2.0246 | 4 | 89.3490 | -0.3990 | -0.0657 |
| P0430F03.13      | Putative Glucosyltransferase                   | At2g18570 | UDP-Glucuronosyl/UDP-Glucosyl Transferase Family Protein                                  | 0.7377 | 4.3351 | 4 | 96.0350 | -0.3598 | -0.0374 |
| P0461B08.26      | Putative MAP3K Alpha 1 Protein Kinase          | At1g63700 | YDA (YODA); Kinase                                                                        | 0.3808 | 4.7763 | 4 | 33.4110 | 0.1199  | -0.0166 |

|               |                                                 |           |                                                                                                                              |        |        |   |         |         |         |
|---------------|-------------------------------------------------|-----------|------------------------------------------------------------------------------------------------------------------------------|--------|--------|---|---------|---------|---------|
| P0470F10.14   | Putative Avr9 Elicitor Response Protein         | At1g32930 | Galactosyltransferase Family Protein                                                                                         | 0.3312 | 2.2905 | 4 | 52.4590 | -0.2272 | -0.0840 |
| P0483D07.18   | 'Unknown Protein, Contains Histidine-Containing | At3g16360 | AHP4 (HPT PHOSPHOTRANSFER KINASE 4); Histidine Phosphotransfer Kinase/Transferase, Transferring Phosphorus-Containing Groups | 0.3495 | 3.3542 | 4 | 53.9570 | -0.4345 | -0.0651 |
| P0496H05.17   | Putative Cyt-P450 Monooxygenase                 | At2g45550 | CYP76C4 (Cytochrome P450, Family 76, Subfamily C, Polypeptide 4); Oxygen Binding                                             | 0.6230 | 4.4066 | 4 | 95.2970 | -0.4300 | -0.0355 |
| P0503D09.101  | Unknown Protein                                 | At5g46090 | Unknown Protein                                                                                                              | 0.5524 | 3.7064 | 4 | 99.4680 | -0.3325 | -0.1080 |
| P0524G08.110  | Putative Calcium/Calmodulin-Dependent Protein   | At2g41140 | CRK1 (CDPK-RELATED KINASE 1); Calcium Ion Binding / Calcium-Dependent Protein Serine/Threonine Phosphatase/ Kinase           | 0.1645 | 4.5321 | 4 | 56.8350 | -0.2631 | -0.0278 |
| P0524G08.134  | Putative Transcription Factor APFI              | At1g47260 | APFI; Carbonate Dehydratase                                                                                                  | 0.1842 | 1.5381 | 4 | 50.9800 | -0.2826 | -0.0681 |
| P0543D10.26   | Putative SAP1 Protein                           | At3g04570 | DNA-Binding Protein-Related                                                                                                  | 0.3132 | 3.9454 | 4 | 91.5560 | -0.3796 | -0.0681 |
| P0643F09.26   | Putative Myosin Subfamily XI Heavy Chain        | At5g43900 | Mya2 (Arabidopsis Myosin)                                                                                                    | 0.1990 | 5.1933 | 4 | 38.8770 | 0.0463  | -0.0062 |
| P0650H04.32   | Putative White Pigment Protein                  | At2g39350 | ABC Transporter Family Protein                                                                                               | 0.6824 | 4.7121 | 4 | 85.7340 | -0.4342 | -0.0311 |
| P0676H02.31-1 | Putative Isoamylase-Type Starch Debranching     | At4g09020 | ATISA3/ISA3 (ISOAMYLASE 3); Alpha-Amylase                                                                                    | 0.1843 | 2.1763 | 4 | 39.3020 | -0.0251 | -0.0103 |

|               |                                                  |           |                                                                                                             |        |        |   |         |         |         |
|---------------|--------------------------------------------------|-----------|-------------------------------------------------------------------------------------------------------------|--------|--------|---|---------|---------|---------|
| P0680A05.37   | Putative Hydrolase                               | At4g36610 | Hydrolase, Alpha/Beta Fold Family Protein                                                                   | 0.3601 | 3.9562 | 4 | 92.7900 | -0.4499 | -0.0560 |
| P0684F11.2    | Putative Immediate-Early Fungal Elicitor Protein | At5g37490 | U-Box Domain-Containing Protein                                                                             | 0.6936 | 4.2568 | 4 | 93.6020 | -0.4303 | -0.0442 |
| B1090H08.30   | Putative Cytochrome B-561                        | At5g38630 | ACYB-1 (Arabidopsis Cytochrome B561-1); Carbon-Monoxide Oxygenase                                           | 0.3783 | 1.9794 | 5 | 68.5590 | -0.2434 | -0.1137 |
| B1097D05.13   | Putative Serine Threonine Kinase                 | At5g26150 | Protein Kinase Family Protein                                                                               | 0.4472 | 4.6308 | 5 | 94.9350 | -0.4037 | -0.0207 |
| OJ1001_C01.13 | Putative GDP Dissociation Inhibitor              | At2g44100 | ATGDI1 (Arabidopsis Thaliana Guanosine Diphosphate Dissociation Inhibitor 1)                                | 0.1352 | 2.9580 | 5 | 43.1600 | 0.0398  | -0.0408 |
| OJ1001_D02.31 | Putative Anthranilate Phosphoribosyltransferase  | At3g57880 | C2 Domain-Containing Protein                                                                                | 0.4540 | 4.6964 | 5 | 91.1680 | -0.4625 | -0.0244 |
| OJ1003_F05.11 | Putative Flavonoid Glucosyl-Transferase          | At2g36750 | UGT72C1 (UDP-Glucosyl Transferase 72C1); UDP-Glycosyltransferase/ Transferase, Transferring Glycosyl Groups | 0.5715 | 4.3665 | 5 | 89.4960 | -0.3506 | -0.0238 |
| OJ1004_A05.35 | Putative Emperature Stress-Induced Lipocalin     | At5g58070 | Lipocalin, Putative                                                                                         | 0.2129 | 3.3779 | 5 | 98.9130 | -0.4520 | -0.0436 |
| OJ1008_E02.21 | Putative SEC14 Cytosolic Factor                  | At1g19650 | SEC14 Cytosolic Factor, Putative / Phosphoglyceride Transfer Protein, Putative                              | 0.4789 | 4.4936 | 5 | 45.3720 | -0.1986 | -0.0273 |
| OJ1119_B04.4  | Putative DD1A Protein                            | At1g55360 | Unknown Protein                                                                                             | 0.1983 | 4.1894 | 5 | 77.3780 | -0.3961 | -0.0613 |

|                |                                       |           |                                                                                                                   |        |        |   |         |         |         |
|----------------|---------------------------------------|-----------|-------------------------------------------------------------------------------------------------------------------|--------|--------|---|---------|---------|---------|
| OJ1124_H03.12  | Hypothetical Protein                  | At1g05440 | Unknown Protein                                                                                                   | 0.8574 | 4.0661 | 5 | 94.0980 | -0.3799 | -0.0548 |
| OJ1159_D09.7   | Lipase-Like Protein                   | At2g27360 | Lipase, Putative                                                                                                  | 0.6232 | 2.5303 | 5 | 62.9920 | -0.2983 | -0.0670 |
| OJ1200_C08.18  | Unknown Protein                       | At1g08400 | Chromosome Structural Maintenance Protein-Related                                                                 | 0.5736 | 4.5515 | 5 | 38.0420 | 0.0898  | -0.0228 |
| OJ1212_D02.8   | Putative B-Keto Acyl Reductase        | At1g67730 | B-Keto Acyl Reductase, Putative (GLOSSY8)                                                                         | 0.3400 | 3.9013 | 5 | 81.7430 | -0.4387 | -0.1201 |
| OJ1340_C08.132 | Putative Thymidylate Kinase           | At5g59440 | Thymidylate Kinase Family Protein                                                                                 | 0.2724 | 2.0266 | 5 | 42.7840 | -0.3365 | -0.1061 |
| OJ1442_E05.31  | UDP-Glucose Pyrophosphorylase         | At5g17310 | UTP--Glucose-1-Phosphate Uridyltransferase, Putative / UDP-Glucose Pyrophosphorylase, Putative / Ugpase, Putative | 0.1171 | 1.8506 | 5 | 61.5210 | -0.2803 | -0.0503 |
| OJ1479_B11.10  | Putative Glycosyl Hydrolase Family 35 | At2g16730 | BGAL13 (Beta-Galactosidase 13); Beta-Galactosidase                                                                | 0.4147 | 4.6951 | 5 | 87.4060 | -0.5294 | -0.0320 |
| OJ1532_D06.3   | Unknown Protein                       | At1g32250 | Calmodulin, Putative                                                                                              | 0.6075 | 3.3311 | 5 | 97.2220 | -0.4572 | -0.1346 |
| OJ1613_G04.20  | Putative Polycomb Group Protein FIE2  | At3g20740 | FIE (FERTILIZATION-INDEPENDENT ENDOSPERM 1); Nucleotide Binding / Transcription Factor                            | 0.2301 | 2.4023 | 5 | 50.2810 | -0.1246 | -0.0468 |
| OJ1626_B09.8   | Putative Nitrilase 2                  | At5g22300 | Nit4 (Nitrilase 4)                                                                                                | 0.2109 | 3.1311 | 5 | 47.3370 | 0.0449  | -0.0492 |
| OJ1679_B08.28  | Avrrpt2-Induced Protein 2-Like        | At2g24390 | Unknown Protein                                                                                                   | 0.3517 | 1.6694 | 5 | 68.8890 | -0.4062 | -0.1196 |
| OJ1743A09.9    | Putative Topoisomerase                | At1g22730 | MA3 Domain-Containing Protein                                                                                     | 0.3520 | 4.5722 | 5 | 91.4240 | -0.4457 | -0.0146 |
| OJ1773_H01.102 | Putative Lysine Ketoglutarate         | At1g61240 | Unknown Protein                                                                                                   | 0.3624 | 4.1083 | 5 | 39.5720 | 0.2493  | -0.0192 |

|                      | Reductase                                        |           |                                                                                                   |        |        |   |         |         |         |
|----------------------|--------------------------------------------------|-----------|---------------------------------------------------------------------------------------------------|--------|--------|---|---------|---------|---------|
| OSJNBa0005N<br>02.7  | Unknown Protein                                  | At1g08430 | ALMT1/ATALMT1<br>(AL-ACTIVATED<br>MALATE<br>TRANSPORTER<br>1); Malate<br>Transporter              | 0.6846 | 4.3951 | 5 | 92.1320 | -0.4193 | -0.0402 |
| OSJNBa0007M<br>04.24 | Putative Cell<br>Division Cycle<br>Protein       | At3g53230 | Cell Division<br>Cycle Protein 48,<br>Putative / CDC48,<br>Putative                               | 0.2788 | 4.6730 | 5 | 96.6710 | -0.4506 | -0.0226 |
| OSJNBa0018M<br>05.14 | Unknown Protein                                  | At1g65730 | YSL7 (YELLOW<br>STRIPE LIKE 7);<br>Oligopeptide<br>Transporter                                    | 0.2349 | 4.5978 | 5 | 91.0160 | -0.3877 | -0.0118 |
| OSJNBa0018M<br>05.19 | Unknown Protein                                  | At5g23240 | DNAJ Heat Shock<br>N-Terminal<br>Domain-<br>Containing<br>Protein                                 | 0.5648 | 4.3741 | 5 | 84.4980 | -0.4095 | -0.0235 |
| OSJNBa0020H<br>14.13 | Putative Plastid<br>Division Protein<br>Ftsz     | At3g52750 | FTSZ2-2 (Ftsz2-<br>2); Structural<br>Molecule                                                     | 0.2535 | 2.8307 | 5 | 43.4000 | -0.0585 | -0.0318 |
| OSJNBa0029C<br>15.7  | Anther-Specific<br>Protein YY2                   | At1g02050 | Chalcone And<br>Stilbene Synthase<br>Family Protein                                               | 0.3109 | 1.9675 | 5 | 57.6600 | -0.5161 | -0.0506 |
| OSJNBa0033H<br>08.6  | Unknown Protein                                  | At1g62940 | 4-Coumarate--<br>Coa Ligase<br>Family Protein / 4-<br>Coumaroyl-Coa<br>Synthase Family<br>Protein | 0.2975 | 4.5114 | 5 | 96.9110 | -0.4160 | -0.0272 |
| OSJNBa0034E<br>08.23 | Putative Piwi<br>Domain<br>Containing<br>Protein | At1g69440 | Ago7<br>(Argonaute7)                                                                              | 0.3695 | 4.9166 | 5 | 53.7220 | -0.1913 | -0.0052 |
| OSJNBa0036B<br>21.20 | Unknown Protein                                  | At5g27870 | Pectinesterase<br>Family Protein                                                                  | 0.5375 | 4.3159 | 5 | 97.9590 | -0.5238 | -0.0255 |
| OSJNBa0038F<br>22.1  | Receptor Protein<br>Kinase-Like                  | At2g21480 | Protein Kinase<br>Family Protein                                                                  | 0.3126 | 4.7166 | 5 | 98.2650 | -0.4691 | -0.0425 |
| OSJNBa0039C<br>07.14 | Unknown Protein                                  | At5g45880 | Pollen Ole E 1<br>Allergen And<br>Extensin Family<br>Protein                                      | 0.6195 | 3.5132 | 5 | 73.8560 | -0.5475 | -0.0655 |
| OSJNBa0041A<br>02.11 | Unknown Protein                                  | At1g31410 | Putrescine-<br>Binding                                                                            | 0.3654 | 1.5152 | 5 | 49.1180 | -0.1631 | -0.0261 |

|                       |                                            |           |                                                         |        |        |   |         |         |         |
|-----------------------|--------------------------------------------|-----------|---------------------------------------------------------|--------|--------|---|---------|---------|---------|
|                       |                                            |           | Periplasmic Protein-Related                             |        |        |   |         |         |         |
| OSJNBa0041A<br>02.24  | Unknown Protein                            | At4g30160 | VLN4 (ARABIDOPSIS THALIANA VILLIN 4); Actin Binding     | 0.2564 | 2.5275 | 5 | 38.7870 | 0.1219  | -0.0136 |
| OSJNBa0044E<br>16.22  | Carboxyl-Terminal Peptidase-Like           | At5g18460 | Hypothetical Protein                                    | 0.3878 | 4.2335 | 5 | 90.7800 | -0.4427 | -0.0795 |
| OSJNBa0045C<br>13.16  | Putative Vacuolar Sorting Receptor Protein | At2g14740 | Vacuolar Sorting Receptor, Putative                     | 0.1825 | 2.7219 | 5 | 48.0540 | 0.0925  | -0.0566 |
| OSJNBa0052F<br>07.11  | Putative Argonaute Protein                 | At2g27880 | Argonaute Protein, Putative / AGO, Putative             | 0.3546 | 4.9209 | 5 | 55.9000 | -0.3816 | -0.0323 |
| OSJNBa0057M<br>23.115 | Unknown Protein                            | At2g16070 | Pdv2 (Plastid Division2)                                | 0.4777 | 3.9025 | 5 | 43.6120 | -0.0443 | -0.0393 |
| OSJNBa0057M<br>23.117 | PRLI-Interacting Factor G-Like Protein     | At3g50780 | Unknown Protein                                         | 0.3777 | 4.3869 | 5 | 49.6960 | -0.1151 | -0.0254 |
| OSJNBa0059E<br>14.14  | Unknown Protein                            | At1g55340 | Unknown Protein                                         | 0.4568 | 3.6221 | 5 | 55.1020 | 0.1244  | -0.0505 |
| OSJNBa0060K<br>08.30  | Unknown Protein                            | At5g16730 | Unknown Protein                                         | 1.2104 | 2.0750 | 5 | 37.7720 | 0.0330  | -0.0322 |
| OSJNBa0065J1<br>7.11  | Putative Peroxidase                        | At5g66390 | Peroxidase 72 (PER72) (P72) (PRXR8)                     | 0.2304 | 4.0192 | 5 | 86.9300 | -0.5267 | -0.0202 |
| OSJNBa0070N<br>04.15  | Hypothetical Protein                       | At2g22070 | Pentatricopeptide (PPR) Repeat-Containing Protein       | 0.3651 | 2.4438 | 5 | 73.8790 | -0.3854 | -0.0367 |
| OSJNBa0071K<br>18.5   | Putative WD Domain Containing Protein      | At2g20330 | Transducin Family Protein / WD-40 Repeat Family Protein | 0.2423 | 4.5948 | 5 | 48.0070 | -0.1445 | -0.0413 |
| OSJNBa0072H<br>09.17  | Extracellular Calcium Sensing Receptor     | At5g23060 | Unknown Protein                                         | 0.4030 | 5.7035 | 5 | 86.1700 | -0.4210 | -0.0625 |
| OSJNBa0081C<br>13.26  | Putative WD Repeat Domain 11               | At3g33530 | Transducin Family Protein / WD-40 Repeat Family Protein | 0.2324 | 2.3542 | 5 | 33.2350 | 0.1937  | -0.0175 |
| OSJNBa0084K<br>11.20  | Unknown Protein                            | At1g47670 | Amino Acid Transporter Family Protein                   | 0.3580 | 4.4975 | 5 | 89.0000 | -0.4128 | -0.0449 |

|                      |                                 |           |                                                                                       |        |        |   |         |         |         |
|----------------------|---------------------------------|-----------|---------------------------------------------------------------------------------------|--------|--------|---|---------|---------|---------|
| OSJNBa0084K<br>20.5  | Unknown Protein                 | At1g67530 | Armadillo/Beta-Catenin Repeat Family Protein / U-Box Domain-Containing Family Protein | 0.5083 | 2.2783 | 5 | 60.6800 | -0.3404 | -0.0119 |
| OSJNBa0087O<br>24.20 | Unknown Protein                 | At5g65930 | ZWI (ZWICHEL); Calmodulin Binding / Microtubule Motor                                 | 0.2004 | 5.0237 | 5 | 34.7370 | 0.3200  | -0.0133 |
| OSJNBa0088I2<br>2.12 | Unknown Protein                 | At1g12740 | CYP87A2 (Cytochrome P450, Family 87, Subfamily A, Polypeptide 2); Oxygen Binding      | 0.3558 | 2.4085 | 5 | 73.2760 | -0.2150 | -0.0583 |
| OSJNBa0091P<br>11.14 | Putative Male Sterility Protein | At3g11980 | Ms2 (Male Sterility 2)                                                                | 0.4021 | 4.5342 | 5 | 77.1780 | -0.2934 | -0.0331 |
| OSJNBa0095C<br>07.6  | Putative Protein Kinase         | At4g35470 | Leucine-Rich Repeat Family Protein                                                    | 0.1708 | 4.1905 | 5 | 83.6600 | -0.3691 | -0.0430 |
| OSJNBb0015I1<br>1.13 | Protein Kinase-Like Protein     | At4g35230 | Protein Kinase Family Protein                                                         | 0.2055 | 4.3608 | 5 | 59.1000 | -0.3759 | -0.0477 |
| OSJNBb0023M<br>11.20 | Putative 1,4-Beta-Xylanase      | At4g33830 | Glycosyl Hydrolase Family 10 Protein                                                  | 0.4472 | 4.3628 | 5 | 96.1540 | -0.4356 | -0.0407 |
| OSJNBb0024B<br>16.7  | Putative Lipxygenase            | At3g22400 | Lipxygenase, Putative                                                                 | 0.3574 | 4.8361 | 5 | 62.4850 | -0.3153 | -0.0111 |
| OSJNBb0038F<br>03.4  | Unknown Protein                 | At2g19170 | SLP3 (Subtilisin-Like Serine Protease 3); Subtilase                                   | 0.6295 | 2.2780 | 5 | 60.0740 | -0.1667 | -0.0089 |
| OSJNBb0039L<br>24.1  | Unknown Protein                 | At3g61220 | Short-Chain Dehydrogenase/R eductase (SDR) Family Protein                             | 0.4779 | 4.0425 | 5 | 77.2730 | -0.3603 | -0.0450 |
| OSJNBb0039L<br>24.7  | Unknown Protein                 | At3g61230 | LIM Domain-Containing Protein                                                         | 0.2993 | 3.5704 | 5 | 78.7230 | -0.3316 | -0.0736 |
| OSJNBb0088N<br>06.16 | Ubiquitin-Conjugating Enzyme    | At4g27960 | UBC9 (UBIQUITIN CONJUGATING ENZYME 9); Ubiquitin-Protein Ligase                       | 0.0732 | 2.4790 | 5 | 72.6030 | -0.3009 | -0.0818 |
| OSJNBb0091E          | Unknown Protein                 | At3g07570 | Membrane                                                                              | 0.5346 | 4.0781 | 5 | 95.7100 | -0.4900 | -0.0415 |

|                  |                                                  |           |                                                                                        |        |        |   |         |         |         |
|------------------|--------------------------------------------------|-----------|----------------------------------------------------------------------------------------|--------|--------|---|---------|---------|---------|
| 11.23            |                                                  |           | Protein, Putative                                                                      |        |        |   |         |         |         |
| OSJNBb0092C08.24 | Putative Avr9/Cf-9 Rapidly Elicited Protein      | At5g42340 | Binding / Ubiquitin-Protein Ligase                                                     | 0.4158 | 4.5732 | 5 | 94.4260 | -0.4478 | -0.0346 |
| OSJNBb0094P23.29 | Putative Acyl-[Acyl-Carrier Protein] Desaturase, | At3g02610 | Acyl-[Acyl-Carrier-Protein] Desaturase                                                 | 0.5136 | 4.2248 | 5 | 90.3140 | -0.4423 | -0.0259 |
| OSJNBb0099O15.10 | Putative Cation/Hydrogen Exchanger (CHX6a)       | At2g13620 | ATCHX15 (Cation/Hydrogen Exchanger 15); Monovalent Cation:Proton Antipporter           | 0.3565 | 4.8174 | 5 | 97.7270 | -0.3991 | -0.0252 |
| P0028G04.28      | Hypothetical Protein                             | At2g46930 | Pectinacetylesterase, Putative                                                         | 0.3852 | 4.2282 | 5 | 84.4830 | -0.5329 | -0.0474 |
| P0034A04.127-2   | Pyruvate Decarboxylase Isozyme 3                 | At4g33070 | Pyruvate Decarboxylase, Putative                                                       | 0.1567 | 4.4710 | 5 | 95.6990 | -0.4660 | -0.0264 |
| P0039G05.11      | Florfenicol Resistance Protein-Like              | At1g60230 | Radical SAM Domain-Containing Protein                                                  | 0.2600 | 1.6006 | 5 | 52.6460 | -0.4364 | -0.0606 |
| P0407A09.6-1     | Transmembrane Protein-Like                       | At4g09810 | Transporter-Related                                                                    | 0.1711 | 1.6252 | 5 | 42.1540 | 0.2981  | -0.0511 |
| P0407B12.19      | Putative UTP-Glucose Glucosyltransferase         | At1g01420 | UDP-Glucuronosyl/UDP-Glucosyl Transferase Family Protein                               | 0.5373 | 4.4233 | 5 | 93.7370 | -0.4176 | -0.0414 |
| P0409B08.17      | Putative Reductase                               | At1g68540 | Oxidoreductase Family Protein                                                          | 0.3293 | 4.1217 | 5 | 94.6710 | -0.3801 | -0.0546 |
| P0413G02.1       | Putative Cytokinin Oxidase                       | At1g75450 | CKX5 (CYTOKININ OXIDASE 5); Cytokinin Dehydrogenase                                    | 0.2793 | 4.3985 | 5 | 93.4260 | -0.4194 | -0.0226 |
| P0427G12.14      | Putative Endoglucanase 1 Precursor               | At1g02800 | ATCEL2 (Arabidopsis Thaliana Cellulase 2); Hydrolase, Hydrolyzing O-Glycosyl Compounds | 0.3392 | 4.3137 | 5 | 96.2750 | -0.3729 | -0.0289 |
| P0434C04.32      | Putative Seven                                   | At4g02600 | ATMLO1/MLO1                                                                            | 0.3093 | 3.4202 | 5 | 60.5430 | -0.4304 | -0.0424 |



|              |                                              |           |                                                                     |        |        |   |         |         |         |
|--------------|----------------------------------------------|-----------|---------------------------------------------------------------------|--------|--------|---|---------|---------|---------|
|              | Transmembrane Protein                        |           | (MILDEW RESISTANCE LOCUS O 1); Calmodulin Binding                   |        |        |   |         |         |         |
| P0453E05.113 | Putative Cyclin-Dependent Kinase CDC2C       | At1g18670 | IBS1 (IMPAIRED IN BABA-INDUCED STERILITY 1); Kinase                 | 0.4032 | 2.6483 | 5 | 47.7200 | -0.1185 | -0.0330 |
| P0460E08.9   | Ospk7                                        | At4g18700 | CIPK12 (CIPK12); Kinase                                             | 0.2945 | 4.3384 | 5 | 70.0410 | -0.2381 | -0.0521 |
| P0461A06.15  | Putative Germin Protein Type 1               | At3g05950 | Germin-Like Protein, Putative                                       | 0.3706 | 3.8827 | 5 | 54.7950 | -0.1442 | -0.0567 |
| P0461B08.35  | Putative Uracil Transport Protein            | At5g03560 | Nucleobase:Cation Symporter                                         | 0.3619 | 4.5189 | 5 | 89.9050 | -0.3613 | -0.0394 |
| P0461D06.12  | Putative High-Affinity Potassium Transporter | At2g30070 | ATKT1 (Arabidopsis Thaliana K+ Uptake 1); Potassium Ion Transporter | 0.5641 | 4.7169 | 5 | 90.2820 | -0.3896 | -0.0296 |
| P0470A12.34  | Putative Peptide Transporter                 | At1g69870 | Proton-Dependent Oligopeptide Transport (POT) Family Protein        | 0.4563 | 3.0244 | 5 | 45.5030 | 0.1212  | -0.0234 |
| P0470A12.38  | Putative Rho GDP-Dissociation Inhibitor      | At3g07880 | Rho GDP-Dissociation Inhibitor Family Protein                       | 0.3598 | 3.6459 | 5 | 73.1580 | -0.5763 | -0.0516 |
| P0475F05.16  | Branching Enzyme-3 Precursor                 | At5g03650 | Sbe2.2 (Starch Branching Enzyme 2.2)                                | 0.1966 | 4.7038 | 5 | 41.9150 | 0.2122  | -0.0298 |
| P0476H10.22  | Putative SNAP25                              | At1g13890 | SNAP30 (Synaptosomal-Associated Protein 30)                         | 0.4421 | 3.8509 | 5 | 77.6860 | -0.5405 | -0.0861 |
| P0483C08.45  | Putative O-Linked N-Acetyl Glucosamine       | At3g04240 | SEC (SECRET AGENT); Transferase, Transferring Glycosyl Groups       | 0.1785 | 4.8455 | 5 | 41.0850 | -0.0188 | -0.0291 |
| P0487D09.19  | Putative Myosin II Heavy Chain               | At1g68060 | ATMAP70-1 (MICROTUBULE-ASSOCIATED                                   | 0.1815 | 4.4790 | 5 | 40.9680 | -0.0586 | -0.0411 |

|              |                                           |           |                                                                                                                                                                             |        |        |   |         |         |         |
|--------------|-------------------------------------------|-----------|-----------------------------------------------------------------------------------------------------------------------------------------------------------------------------|--------|--------|---|---------|---------|---------|
|              |                                           |           | PROTEINS 70-1);<br>Microtubule<br>Binding                                                                                                                                   |        |        |   |         |         |         |
| P0501G01.21  | Putative<br>Endopolygalactu<br>ronase     | At3g59850 | Polygalacturonas<br>e, Putative /<br>Pectinase,<br>Putative                                                                                                                 | 0.4332 | 4.1676 | 5 | 89.6370 | -0.3608 | -0.0300 |
| P0514G12.27  | Unknown Protein                           | At3g53210 | Nodulin Mtn21<br>Family Protein                                                                                                                                             | 0.8294 | 1.7145 | 5 | 55.5560 | -0.0317 | -0.0408 |
| P0514H03.3   | Hypothetical<br>Protein                   | At4g21300 | Pentatricopeptide<br>(PPR) Repeat-<br>Containing<br>Protein                                                                                                                 | 0.7948 | 4.6344 | 5 | 34.8110 | 0.1431  | -0.0127 |
| P0543C11.35  | Putative<br>Guanylate<br>Binding Protein  | At5g46070 | GTP Binding /<br>Gtpase                                                                                                                                                     | 0.3787 | 2.9640 | 5 | 43.2570 | -0.0816 | -0.0239 |
| P0554F08.6   | Putative<br>Phosphoethanol<br>amine       | At1g48600 | Phosphoethanola<br>mine N-<br>Methyltransferase<br>2, Putative<br>(NMT2)                                                                                                    | 0.1529 | 3.9837 | 5 | 51.5420 | -0.3463 | -0.0257 |
| P0560B06.13  | Putative DNA-<br>Dependent<br>Atpase      | At3g06400 | CHR11<br>(CHROMATIN-<br>REMODELING<br>PROTEIN 11);<br>DNA-Dependent<br>Atpase                                                                                               | 0.1038 | 4.8524 | 5 | 44.0610 | -0.2328 | -0.0184 |
| P0574F11.31  | Putative<br>Ubiquitin-Protein<br>Ligase 1 | At1g70320 | UPL2<br>(UBIQUITIN-<br>PROTEIN<br>LIGASE 2);<br>Ubiquitin-Protein<br>Ligase                                                                                                 | 0.3653 | 5.8461 | 5 | 34.0440 | 0.1438  | -0.0035 |
| P0577B11.124 | Putative<br>CTP:Phosphoryl<br>choline     | At2g32260 | Cholinephosphate<br>Cytidylyltransferas<br>e, Putative /<br>Phosphorylcholine<br>Transferase,<br>Putative /<br>CTP:Phosphochol<br>ine<br>Cytidylyltransferas<br>e, Putative | 0.2389 | 3.9072 | 5 | 71.7050 | -0.5077 | -0.0701 |
| P0585H11.109 | Putative<br>Phytosulfokine<br>Receptor    | At5g53890 | Leucine-Rich<br>Repeat<br>Transmembrane                                                                                                                                     | 0.4063 | 4.9560 | 5 | 70.8850 | -0.4180 | -0.0141 |

|             |                                                   |           |                                                                                                          |        |        |   |         |         |         |
|-------------|---------------------------------------------------|-----------|----------------------------------------------------------------------------------------------------------|--------|--------|---|---------|---------|---------|
|             |                                                   |           | Protein Kinase,<br>Putative                                                                              |        |        |   |         |         |         |
| P0613F08.1  | Bet V I Allergen-<br>Like                         | At5g53160 | Unknown Protein                                                                                          | 0.2047 | 3.6815 | 5 | 74.0540 | -0.4529 | -0.0451 |
| P0622F08.20 | Putative Fruit<br>Protein                         | At1g15140 | Oxidoreductase<br>NAD-Binding<br>Domain-<br>Containing<br>Protein                                        | 0.3412 | 1.5913 | 5 | 59.5670 | -0.3263 | -0.0199 |
| P0663F07.43 | Putative<br>Serine/Threonine<br>-Specific Protein | At2g33580 | Protein Kinase<br>Family Protein /<br>Peptidoglycan-<br>Binding Lysm<br>Domain-<br>Containing<br>Protein | 0.6364 | 3.7994 | 5 | 96.6940 | -0.3791 | -0.0584 |
| P0669G09.12 | Unknown Protein                                   | At3g02070 | OTU-Like<br>Cysteine Protease<br>Family Protein                                                          | 0.3207 | 3.7041 | 5 | 43.2690 | -0.0301 | -0.0415 |
| P0683F02.8  | Putative<br>Permease 1                            | At4g38050 | Permease                                                                                                 | 0.5157 | 4.2338 | 5 | 48.2650 | -0.0300 | -0.0301 |
| P0689H05.20 | Putative Ent-<br>Kaurene<br>Synthase B            | At1g79460 | GA2 (GA<br>REQUIRING 2);<br>Ent-Kaurene<br>Synthase                                                      | 0.5764 | 1.8307 | 5 | 49.8690 | 0.1364  | -0.0153 |
| P0704D04.1  | Hypothetical<br>Protein                           | At1g66770 | Nodulin Mtn3<br>Family Protein                                                                           | 0.5352 | 3.9456 | 5 | 90.3610 | -0.5278 | -0.0425 |

**Supplementary Table 6:** Details of Arabidopsis housekeeping highly expressed genes. GC<sub>3</sub> represents GC content at third codon position; wRn corresponds to error minimization values for individual Arabidopsis genes.

| <b>ARABIDOPSIS HOUSEKEEPING HIGHLY EXPRESSED GENE</b> |                                                                                             |                       |            |
|-------------------------------------------------------|---------------------------------------------------------------------------------------------|-----------------------|------------|
| <b>GENE ID</b>                                        | <b>Functional Description</b>                                                               | <b>GC<sub>3</sub></b> | <b>wRN</b> |
| At5g67360                                             | ARA12; Subtilase                                                                            | 47.8740               | -0.0903    |
| At5g66140                                             | PAD2 (20S Proteasome Alpha Subunit D2); Peptidase                                           | 51.9650               | -0.5482    |
| At5g65700                                             | BAM1 (Big Apical Meristem 1); ATP Binding / Kinase/ Protein Serine/Threonine Kinase         | 45.5790               | -0.0914    |
| At5g62300                                             | 40S Ribosomal Protein S20 (RPS20C)                                                          | 51.7240               | -0.4076    |
| At5g61170                                             | 40S Ribosomal Protein S19 (RPS19C)                                                          | 51.0640               | -0.4142    |
| At5g58420                                             | 40S Ribosomal Protein S4 (RPS4D)                                                            | 52.9880               | -0.3444    |
| At5g55180                                             | Glycosyl Hydrolase Family 17 Protein                                                        | 53.5560               | -0.2769    |
| At5g54770                                             | Thi1 (Thiazole Requiring)                                                                   | 43.5820               | -0.3474    |
| At5g53300                                             | UBC10 (Ubiquitin-Conjugating Enzyme 10); Ubiquitin-Protein Ligase                           | 58.7410               | -0.3385    |
| At5g51750                                             | Subtilase Family Protein                                                                    | 33.1990               | 0.3133     |
| At5g50870                                             | UBC27 (Ubiquitin-Conjugating Enzyme 26); Ubiquitin-Protein Ligase                           | 39.4440               | -0.1942    |
| At5g50850                                             | Pyruvate Dehydrogenase E1 Component Beta Subunit, PDHE1-B (PDH2)                            | 34.6270               | 0.0028     |
| At5g48930                                             | Transferase Family Protein                                                                  | 41.6670               | -0.3203    |
| At5g47120                                             | Atbi-1 (Arabidopsis Bax Inhibitor 1)                                                        | 42.0830               | 0.0531     |
| At5g45110                                             | NPR3 (NPR1-LIKE PROTEIN 3); Protein Binding                                                 | 34.0580               | -0.2181    |
| At5g43940                                             | ADH2 (ALCOHOL DEHYDROGENASE 2); Formaldehyde Dehydrogenase (Glutathione)                    | 40.8960               | -0.3573    |
| At5g43060                                             | Cysteine Proteinase, Putative / Thiol Protease, Putative                                    | 45.7470               | -0.1075    |
| At5g42790                                             | PAF1 (Proteasome Alpha Subunit F1); Peptidase                                               | 38.8890               | 0.0269     |
| At5g42020                                             | BIP (LUMINAL BINDING PROTEIN); ATP Binding                                                  | 48.8370               | -0.4166    |
| At5g40810                                             | Cytochrome C1, Putative                                                                     | 37.5440               | 0.1060     |
| At5g39740                                             | 60S Ribosomal Protein L5 (RPL5B)                                                            | 48.0140               | -0.2558    |
| At5g38470                                             | DNA Repair Protein RAD23, Putative                                                          | 35.0570               | -0.1792    |
| At5g37600                                             | ATGSR1 (Arabidopsis Thaliana Glutamine Synthase Clone R1); Glutamate-Ammonia Ligase         | 45.8080               | -0.1717    |
| At5g33370                                             | GDSL-Motif Lipase/Hydrolase Family Protein                                                  | 47.0250               | -0.2385    |
| At5g27990                                             | Unknown Protein                                                                             | 42.2620               | -0.0204    |
| At5g20890                                             | Chaperonin, Putative                                                                        | 40.5800               | -0.2958    |
| At5g20720                                             | CPN20 (CHAPERONIN 20); Calmodulin Binding                                                   | 39.6620               | -0.1372    |
| At5g20290                                             | 40S Ribosomal Protein S8 (RPS8A)                                                            | 52.8850               | -0.3999    |
| At5g20010                                             | RAN-1 (Ras-Related GTP-Binding Nuclear Protein 1); GTP Binding                              | 46.4110               | -0.2164    |
| At5g19690                                             | STT3A (STAUROSPORIN AND TEMPERATURE SENSITIVE 3-LIKE A); Oligosaccharyl Transferase         | 41.1290               | -0.2036    |
| At5g19510                                             | Elongation Factor 1B Alpha-Subunit 2 (Eef1balph2)                                           | 46.7980               | -0.4057    |
| At5g15490                                             | UDP-Glucose 6-Dehydrogenase, Putative                                                       | 49.4480               | -0.2707    |
| At5g11560                                             | Catalytic                                                                                   | 39.6230               | 0.2041     |
| At5g10360                                             | EMB3010 (EMBRYO DEFECTIVE 3010); Structural Constituent Of Ribosome                         | 51.4520               | -0.3471    |
| At5g09920                                             | RPB15.9 (RNA Polymerase II 15.9)                                                            | 39.4960               | -0.1507    |
| At5g09510                                             | 40S Ribosomal Protein S15 (RPS15D)                                                          | 52.7780               | -0.1652    |
| At5g07350                                             | Tudor Domain-Containing Protein / Nuclease Family Protein                                   | 36.3070               | 0.0209     |
| At5g05170                                             | CESA3 (CELLULOSE SYNTHASE 3); Cellulose Synthase/ Transferase, Transferring Glycosyl Groups | 40.4980               | -0.1879    |

|           |                                                                                                                                                                                                             |         |         |
|-----------|-------------------------------------------------------------------------------------------------------------------------------------------------------------------------------------------------------------|---------|---------|
| At5g03300 | ADK2 (ADENOSINE KINASE 2); Kinase                                                                                                                                                                           | 50.1560 | -0.2622 |
| At5g02960 | 40S Ribosomal Protein S23 (RPS23B)                                                                                                                                                                          | 46.6670 | -0.4041 |
| At5g01530 | Chlorophyll A-B Binding Protein CP29 (LHCB4)                                                                                                                                                                | 56.8350 | -0.2848 |
| At4g38580 | ATFP6 (FARNESYLATED PROTEIN 6); Metal Ion Binding                                                                                                                                                           | 62.0690 | -0.2886 |
| At4g37870 | ATP Binding / Phosphoenolpyruvate Carboxykinase (ATP)                                                                                                                                                       | 43.0160 | -0.1969 |
| At4g35310 | CPK5 (CALMODULIN-DOMAIN PROTEIN KINASE 5); Calcium- And Calmodulin-Dependent Protein Kinase/ Kinase                                                                                                         | 37.2590 | -0.0488 |
| At4g34230 | Cad5 (Cinnamyl Alcohol Dehydrogenase 5)                                                                                                                                                                     | 46.1080 | 0.0111  |
| At4g34200 | EDA9 (Embryo Sac Development Arrest 9); NAD Binding / Amino Acid Binding / Cofactor Binding / Oxidoreductase, Acting On The CH-OH Group Of Donors, NAD Or NADP As Acceptor / Phosphoglycerate Dehydrogenase | 47.7880 | -0.4531 |
| At4g34110 | PAB2 (POLY(A)-BINDING PROTEIN 2); RNA Binding                                                                                                                                                               | 46.7230 | -0.3655 |
| At4g32530 | Vacuolar ATP Synthase, Putative / V-Atpase, Putative                                                                                                                                                        | 40.9090 | -0.1234 |
| At4g30190 | AHA2 (Arabidopsis H(+)-Atpase 2); Atpase                                                                                                                                                                    | 46.2230 | -0.2945 |
| At4g29010 | AIM1 (ABNORMAL INFLORESCENCE MERISTEM); Enoyl-Coa Hydratase                                                                                                                                                 | 40.8490 | 0.0881  |
| At4g25130 | Peptide Methionine Sulfoxide Reductase, Putative                                                                                                                                                            | 46.3410 | -0.1084 |
| At4g24190 | SHD (SHEPHERD); ATP Binding                                                                                                                                                                                 | 46.7590 | -0.2707 |
| At4g23630 | Bti1 (Virb2-Interacting Protein 1)                                                                                                                                                                          | 50.3940 | -0.3516 |
| At4g23400 | PIP1;5/PIP1D (Plasma Membrane Intrinsic Protein 1;5); Water Channel                                                                                                                                         | 47.1220 | -0.3019 |
| At4g22310 | Unknown Protein                                                                                                                                                                                             | 41.9050 | -0.1055 |
| At4g15560 | Cla1 (Cloroplastos Alterados 1)                                                                                                                                                                             | 33.5280 | 0.2790  |
| At4g14880 | Oasa1 (O-Acetylserine (Thiol) Lyase (Oas-TI) Isoform A1)                                                                                                                                                    | 38.2550 | -0.0895 |
| At4g14030 | Selenium-Binding Protein, Putative                                                                                                                                                                          | 40.0430 | 0.0758  |
| At4g13430 | Aconitase Family Protein / Aconitate Hydratase Family Protein                                                                                                                                               | 37.5260 | -0.0972 |
| At4g10300 | Unknown Protein                                                                                                                                                                                             | 33.3330 | 0.1295  |
| At4g09800 | RPS18C (S18 RIBOSOMAL PROTEIN); Structural Constituent Of Ribosome                                                                                                                                          | 47.2970 | -0.4091 |
| At4g00360 | CYP86A2 (ABERRANT INDUCTION OF TYPE THREE GENES 1); Oxygen Binding                                                                                                                                          | 63.2380 | -0.2474 |
| At3g62870 | 60S Ribosomal Protein L7A (RPL7aB)                                                                                                                                                                          | 57.5000 | -0.5135 |
| At3g61470 | LHCA2 (Photosystem I Light Harvesting Complex Gene 2); Chlorophyll Binding                                                                                                                                  | 53.0120 | -0.1664 |
| At3g59970 | MTHFR1 (METHYLENETETRAHYDROFOLATE REDUCTASE 1); Methylene tetrahydrofolate Reductase (NADPH)                                                                                                                | 41.6520 | -0.2335 |
| At3g55800 | SBPASE (Sedoheptulose-Bisphosphatase); Phosphoric Ester Hydrolase                                                                                                                                           | 41.8920 | 0.0384  |
| At3g54820 | PIP2;5/PIP2D (Plasma Membrane Intrinsic Protein 2;5); Water Channel                                                                                                                                         | 55.6740 | -0.4304 |
| At3g54050 | Fructose-1,6-Bisphosphatase, Putative / D-Fructose-1,6-Bisphosphate 1-Phosphohydrolase, Putative / Fbpase, Putative                                                                                         | 50.7650 | 0.0448  |
| At3g52580 | 40S Ribosomal Protein S14 (RPS14C)                                                                                                                                                                          | 39.8600 | -0.2305 |
| At3g50820 | PSBO-2/PSBO2 (PHOTOSYSTEM II SUBUNIT O-2); Oxygen Evolving                                                                                                                                                  | 56.4520 | -0.2746 |
| At3g47470 | LHCA4 (Photosystem I Light Harvesting Complex Gene 4); Chlorophyll Binding                                                                                                                                  | 53.5860 | -0.0590 |
| At3g47370 | Structural Constituent Of Ribosome                                                                                                                                                                          | 50.8770 | -0.5380 |
| At3g45640 | ATMPK3 (MITOGEN-ACTIVATED PROTEIN KINASE 3); MAP Kinase/ Kinase/ Protein Kinase                                                                                                                             | 38.3290 | -0.0705 |
| At3g44890 | RPL9 (Ribosomal Protein L9); Structural Constituent Of Ribosome                                                                                                                                             | 47.5410 | -0.1589 |
| At3g44110 | ATJ3 (Arabidopsis Thaliana Dnaj Homologue 3)                                                                                                                                                                | 45.9950 | -0.2160 |
| At3g42050 | Vacuolar ATP Synthase Subunit H Family Protein                                                                                                                                                              | 47.4450 | -0.2314 |
| At3g25800 | PDF1 (65 KDA REGULATORY SUBUNIT OF PROTEIN PHOSPHATASE 2A); Protein Phosphatase Type 2A Regulator                                                                                                           | 38.3490 | -0.0963 |
| At3g24420 | Hydrolase, Alpha/Beta Fold Family Protein                                                                                                                                                                   | 54.8260 | -0.1356 |
| At3g24170 | ATGR1; Glutathione-Disulfide Reductase                                                                                                                                                                      | 37.4460 | -0.0596 |
| At3g24160 | Pmp (Putative Type 1 Membrane Protein)                                                                                                                                                                      | 36.5500 | -0.0116 |
| At3g22890 | APS1 (ATP Sulfurylase 3)                                                                                                                                                                                    | 44.4700 | -0.1700 |
| At3g18190 | Chaperonin, Putative                                                                                                                                                                                        | 45.4370 | -0.3706 |
| At3g13580 | 60S Ribosomal Protein L7 (RPL7D)                                                                                                                                                                            | 53.6040 | -0.2321 |
| At3g13080 | ATMRP3 (Arabidopsis Thaliana Multidrug Resistance-Associated Protein 3)                                                                                                                                     | 40.0980 | 0.0430  |
| At3g08590 | 2,3-Biphosphoglycerate-Independent Phosphoglycerate Mutase, Putative / Phosphoglyceromutase, Putative                                                                                                       | 37.9960 | -0.1936 |

|           |                                                                                                                  |         |         |
|-----------|------------------------------------------------------------------------------------------------------------------|---------|---------|
| At3g04400 | EMB2171 (EMBRYO DEFECTIVE 2171); Structural Constituent Of Ribosome                                              | 45.6520 | -0.2888 |
| At3g04090 | Sip1;1 (Small And Basic Intrinsic Protein 1a)                                                                    | 51.6810 | -0.3683 |
| At3g02570 | MEE31 (Maternal Effect Embryo Arrest 31); Mannose-6-Phosphate Isomerase                                          | 42.1050 | 0.0478  |
| At3g02470 | Samdc (S-Adenosylmethionine Decarboxylase)                                                                       | 58.6310 | -0.3948 |
| At3g01910 | Sox (Sulfite Oxidase)                                                                                            | 49.7310 | -0.4106 |
| At3g01090 | AKIN10 (Arabidopsis SNF1 Kinase Homolog 10, SNF1-RELATED PROTEIN KINASE 1.1); Protein Kinase                     | 44.7700 | -0.1081 |
| At2g47170 | ARF1A1c (ADP-RIBOSYLATION FACTOR 1); GTP Binding / Phospholipase Activator/ Protein Binding                      | 53.8010 | -0.3439 |
| At2g46280 | TRIP-1 (TGF-BETA RECEPTOR INTERACTING PROTEIN 1); Nucleotide Binding                                             | 44.0890 | -0.2934 |
| At2g44310 | Calcium-Binding EF Hand Family Protein                                                                           | 47.6920 | 0.2155  |
| At2g44060 | Late Embryogenesis Abundant Family Protein / LEA Family Protein                                                  | 49.0000 | -0.2071 |
| At2g42500 | PP2A-4 (Protein Phosphatase 2A-4); Protein Phosphatase Type 2A/ Protein Serine/Threonine Phosphatase             | 45.7630 | -0.1276 |
| At2g39570 | ACT Domain-Containing Protein                                                                                    | 38.0100 | 0.1217  |
| At2g37270 | ATRPS5B (RIBOSOMAL PROTEIN 5B); Structural Constituent Of Ribosome                                               | 48.7310 | -0.4586 |
| At2g37190 | 60S Ribosomal Protein L12 (RPL12A)                                                                               | 46.1040 | -0.1340 |
| At2g37040 | PAL1 (PHE AMMONIA LYASE 1); Phenylalanine Ammonia-Lyase                                                          | 44.9400 | -0.0754 |
| At2g36830 | GAMMA-TIP (Tonoplast Intrinsic Protein (TIP) Gamma); Water Channel                                               | 56.0980 | -0.3465 |
| At2g36530 | LOS2 (Low Expression Of Osmotically Responsive Genes 1); Phosphopyruvate Hydratase                               | 49.5150 | -0.4091 |
| At2g34250 | Protein Translocase                                                                                              | 47.5880 | -0.3743 |
| At2g31610 | 40S Ribosomal Protein S3 (RPS3A)                                                                                 | 40.0000 | -0.2799 |
| At2g28000 | CPN60A (Chloroplast / 60 Kda Chaperonin Alpha Subunit); ATP Binding / Protein Binding / Unfolded Protein Binding | 37.9370 | -0.3967 |
| At2g27600 | AAA-Type Atpase Family Protein / Vacuolar Sorting Protein-Related                                                | 36.9350 | -0.2239 |
| At2g27020 | PAG1 (20S Proteasome Alpha Subunit G1); Peptidase                                                                | 40.7890 | -0.2541 |
| At2g21130 | Peptidyl-Prolyl Cis-Trans Isomerase / Cyclophilin (CYP2) / Rotamase                                              | 50.3030 | -0.1829 |
| At2g20450 | 60S Ribosomal Protein L14 (RPL14A)                                                                               | 57.4800 | -0.4520 |
| At2g06050 | Opr3 (Opda-Reductase 3)                                                                                          | 43.5830 | 0.0591  |
| At2g05840 | PAA2 (20S Proteasome Alpha Subunit A2); Peptidase                                                                | 38.5960 | 0.1300  |
| At2g02760 | ATUBC2 (UBIQUITING-CONJUGATING ENZYME 2); Ubiquitin-Protein Ligase                                               | 43.5370 | 0.1853  |
| At1g80300 | Chloroplast ADP, ATP Carrier Protein 1 / ADP, ATP Translocase 1 / Adenine Nucleotide Translocase 1 (AATP1)       | 50.8360 | -0.1783 |
| At1g79550 | Pgk (Phosphoglycerate Kinase)                                                                                    | 47.4800 | -0.3617 |
| At1g77760 | Nia1 (Nitrate Reductase 1)                                                                                       | 52.1080 | -0.0684 |
| At1g77610 | Glucose-6-Phosphate/Phosphate Translocator-Related                                                               | 43.9020 | -0.1577 |
| At1g74270 | 60S Ribosomal Protein L35a (RPL35aC)                                                                             | 65.1380 | -0.2521 |
| At1g73060 | Unknown Protein                                                                                                  | 42.9430 | -0.1932 |
| At1g72750 | ATTIM23-2 (Arabidopsis Thaliana Translocase Inner Membrane Subunit 23-2); Protein Translocase                    | 41.4360 | -0.2267 |
| At1g69530 | Atexpa1 (Arabidopsis Thaliana Expansin A1)                                                                       | 45.6000 | 0.0696  |
| At1g58290 | HEMA1; Glutamyl-Trna Reductase                                                                                   | 35.8870 | -0.0853 |
| At1g54690 | Histone H2A, Putative                                                                                            | 33.8240 | 0.0708  |
| At1g51200 | DNA Binding / Zinc Ion Binding                                                                                   | 48.7800 | 0.0585  |
| At1g49760 | PAB8 (POLY(A) BINDING PROTEIN 8); RNA Binding / Translation Initiation Factor                                    | 37.0700 | -0.1372 |
| At1g43800 | Acyl-(Acyl-Carrier-Protein) Desaturase, Putative / Stearoyl-ACP Desaturase, Putative                             | 56.0440 | -0.1322 |
| At1g32210 | Atdad1 (Defender Against Apoptotic Death 1)                                                                      | 45.1330 | -0.3585 |
| At1g30230 | Elongation Factor 1-Beta / EF-1-Beta                                                                             | 42.4660 | -0.4372 |
| At1g24020 | Bet V I Allergen Family Protein                                                                                  | 53.5210 | -0.5308 |
| At1g23290 | RPL27A (RIBOSOMAL PROTEIN L27A); Structural Constituent Of Ribosome                                              | 55.2450 | -0.3662 |
| At1g17200 | Integral Membrane Family Protein                                                                                 | 43.8780 | -0.4203 |
| At1g16860 | Merozoite Surface Protein-Related                                                                                | 36.2260 | 0.0091  |
| At1g16180 | TMS Membrane Family Protein / Tumour Differentially Expressed (TDE) Family Protein                               | 43.1820 | -0.2575 |
| At1g15820 | LHCB6 (LIGHT HARVESTING COMPLEX PSII); Chlorophyll Binding                                                       | 58.7040 | -0.3353 |

|           |                                                                                              |         |         |
|-----------|----------------------------------------------------------------------------------------------|---------|---------|
| At1g15690 | AVP1 (Vacuolar-Type H <sup>+</sup> -Pumping Pyrophosphatase 1)                               | 43.5140 | -0.4351 |
| At1g12840 | Det3 (De-Etiolated 3)                                                                        | 39.7660 | -0.2275 |
| At1g10940 | ASK1 (ARABIDOPSIS SERINE/THREONINE KINASE 1); Kinase                                         | 43.6920 | -0.0887 |
| At1g09620 | ATP Binding / Aminoacyl-Trna Ligase                                                          | 41.4760 | -       |
| At1g07890 | Apx1 (Ascorbate Peroxidase 1, Maternal Effect Embryo Arrest 6)                               | 47.6600 | 0.2421  |
| At1g06680 | PSBP-1 (OXYGEN-EVOLVING ENHANCER PROTEIN 2); Calcium Ion Binding                             | 50.1990 | -0.2690 |
| At1g02130 | ATRAB1B (Arabidopsis Thaliana Responsive To Abscisic Acid 1B); GTP Binding                   | 40.3140 | -0.0944 |
| At1g01090 | PDH-E1 ALPHA (PYRUVATE DEHYDROGENASE E1 ALPHA); Pyruvate Dehydrogenase (Acetyl-Transferring) | 48.1010 | -0.1864 |
|           |                                                                                              |         | -0.3322 |

**Supplementary Table 7:** Details of Arabidopsis housekeeping lowly expressed genes. GC<sub>3</sub> represents GC content at synonymous third codon position; wRn corresponds to error minimization values for Arabidopsis genes.

| <b>ARABIDOPSIS HOUSEKEEPING LOWLY EXPRESSED GENES</b> |                                                                                                                                |            |            |
|-------------------------------------------------------|--------------------------------------------------------------------------------------------------------------------------------|------------|------------|
| <b>GENE ID</b>                                        | <b>Functional description</b>                                                                                                  | <b>GC3</b> | <b>wRN</b> |
| At1g03010                                             | Phototropic-Responsive NPH3 Family Protein                                                                                     | 39.1600    | 0.0848     |
| At1g05690                                             | BT3 (BTB And TAZ Domain Protein 3); Protein Binding / Transcription Regulator                                                  | 41.4720    | 0.1309     |
| At1g14130                                             | 2-Oxoglutarate-Dependent Dioxygenase, Putative                                                                                 | 43.0070    | 0.2457     |
| At1g18450                                             | ATARP4 (ACTIN-RELATED PROTEIN 4); Structural Constituent Of Cytoskeleton                                                       | 44.4720    | -0.1354    |
| At1g21410                                             | F-Box Family Protein                                                                                                           | 44.0920    | -0.0160    |
| At1g34130                                             | STT3B (STAUROSPORIN AND TEMPERATURE SENSITIVE 3-LIKE B); Oligosaccharyl Transferase                                            | 43.6260    | -0.0577    |
| At1g34300                                             | Lectin Protein Kinase Family Protein                                                                                           | 43.7740    | -0.1373    |
| At1g54940                                             | Glycogenin Glucosyltransferase (Glycogenin)-Related                                                                            | 45.3510    | 0.2623     |
| At1g56130                                             | Leucine-Rich Repeat Family Protein / Protein Kinase Family Protein;                                                            | 39.1480    | 0.2365     |
| At1g79930                                             | HSP91 (Heat Shock Protein 91)                                                                                                  | 45.3330    | -0.4120    |
| At2g19330                                             | Leucine-Rich Repeat Family Protein                                                                                             | 47.0590    | -0.0967    |
| At2g19440                                             | Glycosyl Hydrolase Family 17 Protein                                                                                           | 38.5780    | 0.0586     |
| At2g19490                                             | Reca Family Protein                                                                                                            | 34.7700    | 0.0312     |
| At2g22370                                             | Unknown Protein                                                                                                                | 29.1260    | 0.0135     |
| At2g45240                                             | MAP1A (METHIONINE AMINOPEPTIDASE 1A); Methionyl Aminopeptidase                                                                 | 34.2250    | 0.1409     |
| At3g05320                                             | Unknown Protein                                                                                                                | 37.8310    | 0.2822     |
| At3g50360                                             | ATCEN2 (CENTRIN2); Calcium Ion Binding                                                                                         | 35.0990    | 0.2606     |
| At3g58490                                             | Phosphatidic Acid Phosphatase Family Protein / PAP2 Family Protein                                                             | 44.6650    | -0.1181    |
| At4g02730                                             | Transducin Family Protein / WD-40 Repeat Family Protein                                                                        | 42.7690    | -0.2505    |
| At4g08620                                             | SULTR1;1 (Sulfate Transporter 1;1); Sulfate Transporter                                                                        | 49.5990    | -0.1519    |
| At4g10440                                             | Dehydration-Responsive Family Protein                                                                                          | 36.6720    | 0.1449     |
| At4g22330                                             | ATCES1 (ATCES1); Catalytic                                                                                                     | 49.4620    | 0.0090     |
| At4g26610                                             | Protein Kinase, Putative                                                                                                       | 39.8730    | -0.0267    |
| At4g27070                                             | TSB2 (TRYPTOPHAN SYNTHASE BETA-SUBUNIT); Tryptophan Synthase                                                                   | 48.1900    | -0.1929    |
| At4g39830                                             | L-Ascorbate Oxidase, Putative                                                                                                  | 49.1010    | 0.1367     |
| At5g10930                                             | CIPK5 (CBL-INTERACTING PROTEIN KINASE 5); Kinase                                                                               | 54.6130    | 0.2554     |
| At5g11200                                             | DEAD/DEAH Box Helicase, Putative                                                                                               | 45.2690    | -0.1607    |
| At5g16970                                             | AT-AER (ALKENAL REDUCTASE); 2-Alkenal Reductase                                                                                | 41.5380    | -0.0824    |
| At5g19530                                             | Acl5 (Acaulis 5)                                                                                                               | 44.8390    | -0.3001    |
| At5g24940                                             | Protein Phosphatase 2C, Putative / PP2C, Putative                                                                              | 34.9280    | 0.0759     |
| At5g25450                                             | Ubiquinol-Cytochrome C Reductase Complex 14 Kda Protein, Putative                                                              | 40.1710    | -0.0991    |
| At5g35220                                             | EGY1 (ETHYLENE-DEPENDENT GRAVITROPISM-DEFICIENT AND YELLOW-GREEN 1); Sterol Regulatory Element-Binding Protein Site 2 Protease | 35.5340    | 0.1468     |
| At5g40850                                             | UPM1 (UROPHORPHYRIN METHYLASE 1); Uroporphyrin-III C-Methyltransferase                                                         | 33.2370    | 0.1009     |
| At5g42960                                             | Unknown Protein                                                                                                                | 46.5690    | -0.3561    |
| At5g54750                                             | Transport Protein Particle (TRAPP) Component Bet3, Putative                                                                    | 42.6900    | -0.2300    |



**Supplementary Table 8:** Details of Arabidopsis tissue specific highly expressed genes. GC<sub>3</sub> represents GC content at synonymous third codon position; wRn corresponds to error minimization values for individual Arabidopsis genes.

| <b>ARABIDOPSIS TISSUE SPECIFIC HIGHLY EXPRESSED GENES</b> |                                                                                                                            |                       |            |
|-----------------------------------------------------------|----------------------------------------------------------------------------------------------------------------------------|-----------------------|------------|
| <b>Arabidopsis</b>                                        | <b>Functional description</b>                                                                                              | <b>GC<sub>3</sub></b> | <b>wRN</b> |
| At1g05010                                                 | EFE (Ethylene Forming Enzyme)                                                                                              | 54.9830               | -0.3395    |
| At1g08380                                                 | Psao (Photosystem I Subunit O)                                                                                             | 55.7970               | 0.2920     |
| At1g11680                                                 | Cyp51g1 (Cytochrome P450 51); Oxygen Binding                                                                               | 45.1750               | -0.0887    |
| At1g12200                                                 | Flavin-Containing Monooxygenase Family Protein                                                                             | 49.7690               | 0.0329     |
| At1g15130                                                 | Hydroxyproline-Rich Glycoprotein Family Protein                                                                            | 44.1480               | -0.3099    |
| At1g15690                                                 | Avp1 (Vacuolar-Type H <sup>+</sup> -Pumping Pyrophosphatase 1)                                                             | 43.5140               | -0.4351    |
| At1g21720                                                 | Pbc1 (20s Proteasome Beta Subunit C1); Peptidase                                                                           | 42.9320               | -0.2086    |
| At1g29670                                                 | Gdsl-Motif Lipase/Hydrolase Family Protein                                                                                 | 45.9380               | 0.1159     |
| At1g48410                                                 | Ago1 (Argonaute 1)                                                                                                         | 36.7840               | -0.0058    |
| At1g55360                                                 | Unknown Protein                                                                                                            | 42.2220               | -0.0436    |
| At1g61720                                                 | Ban (Banyuls)                                                                                                              | 49.6790               | 0.1455     |
| At1g67730                                                 | B-Keto Acyl Reductase, Putative (Glossy8)                                                                                  | 39.4290               | -0.0211    |
| At1g70660                                                 | Mms2 (Mms Zwei Homologe 2); Ubiquitin-Protein Ligase                                                                       | 40.9720               | -0.0310    |
| At1g74520                                                 | Athva22a (Arabidopsis Thaliana Hva22 Homologue A)                                                                          | 40.1200               | -0.1931    |
| At2g05990                                                 | Mod1 (Mosaic Death 1); Enoyl-[Acyl-Carrier-Protein] Reductase (Nadh)/ Oxidoreductase                                       | 37.3330               | 0.1768     |
| At2g17190                                                 | Ubiquitin Family Protein                                                                                                   | 41.4870               | -0.2281    |
| At2g21270                                                 | Ubiquitin Fusion Degradation Ufd1 Family Protein                                                                           | 37.6270               | -0.0407    |
| At2g22330                                                 | Cyp79b3 (Cytochrome P450, Family 79, Subfamily B, Polypeptide 3); Oxygen Binding                                           | 48.2040               | -0.1121    |
| At2g33730                                                 | Dead Box Rna Helicase, Putative                                                                                            | 41.0410               | -0.3078    |
| At2g44100                                                 | Atgdi1 (Arabidopsis Thaliana Guanosine Diphosphate Dissociation Inhibitor 1)                                               | 41.7270               | -0.2253    |
| At3g01910                                                 | Sox (Sulfite Oxidase)                                                                                                      | 49.7310               | -0.4106    |
| At3g08030                                                 | Unknown Protein                                                                                                            | 43.0640               | -0.3687    |
| At3g09250                                                 | Dna Binding / Nuclease                                                                                                     | 41.3330               | 0.0622     |
| At3g13920                                                 | Eif4a1 (Eukaryotic Translation Initiation Factor 4a-1)                                                                     | 49.8710               | -0.4750    |
| At3g18190                                                 | Chaperonin, Putative                                                                                                       | 45.4370               | -0.3706    |
| At3g18410                                                 | Nadh-Ubiquinone Oxidoreductase-Related                                                                                     | 53.1910               | -0.2896    |
| At3g20050                                                 | Attcp-1 (Arabidopsis Thaliana T-Complex Protein 1 Alpha Subunit); Atp Binding / Protein Binding / Unfolded Protein Binding | 42.4060               | -0.1059    |
| At3g24170                                                 | Atgr1; Glutathione-Disulfide Reductase                                                                                     | 37.4460               | -0.0596    |
| At3g25800                                                 | Pdf1 (65 Kda Regulatory Subunit Of Protein Phosphatase 2a); Protein Phosphatase Type 2a Regulator                          | 38.3490               | -0.0963    |
| At3g45640                                                 | Atmpk3 (Mitogen-Activated Protein Kinase 3); Map Kinase/ Kinase/ Protein Kinase                                            | 38.3290               | -0.0705    |
| At3g45970                                                 | Atexla1 (Arabidopsis Thaliana Expansin-Like A1)                                                                            | 42.8570               | 0.0118     |
| At3g50820                                                 | Psbo-2/Psbo2 (Photosystem Ii Subunit O-2); Oxygen Evolving                                                                 | 56.4520               | -0.2746    |
| At3g51240                                                 | F3h (Transparent Testa 6); Naringenin 3-Dioxygenase                                                                        | 51.5150               | -0.2120    |
| At3g52850                                                 | Atelp1 (Vacuolar Sorting Receptor Homolog)                                                                                 | 41.2270               | -0.0762    |
| At3g54210                                                 | Ribosomal Protein L17 Family Protein                                                                                       | 43.9610               | -0.1139    |
| At3g58610                                                 | Ketol-Acid Reductoisomerase                                                                                                | 45.2420               | -0.2699    |
| At3g63140                                                 | Mrna-Binding Protein, Putative                                                                                             | 57.0310               | -0.4050    |
| At4g21110                                                 | G10 Family Protein                                                                                                         | 45.0380               | 0.3328     |
| At4g25130                                                 | Peptide Methionine Sulfoxide Reductase, Putative                                                                           | 46.3410               | -0.1084    |

|           |                                                                                                            |         |         |
|-----------|------------------------------------------------------------------------------------------------------------|---------|---------|
| At4g29480 | Atp Synthase G Subunit Family Protein                                                                      | 53.9820 | -0.0532 |
| At4g30210 | Atr2 (Arabidopsis P450 Reductase 2)                                                                        | 36.5440 | -0.0431 |
| At4g35260 | Idh1 (Isocitrate Dehydrogenase 1); Isocitrate Dehydrogenase (Nad+)                                         | 47.2300 | -0.1616 |
| At4g37390 | Ydk1 (Auxin Upregulated1, Yadokari 1); Indole-3-Acetic Acid Amido Synthetase                               | 50.5400 | 0.1042  |
| At4g37930 | Shm1 (Serine Hydroxymethyltransferase 1); Glycine Hydroxymethyltransferase                                 | 39.0400 | -0.2133 |
| At4g38130 | Hd1 (Histone Deacetylase 19, Histone Deacetylase19)                                                        | 44.0860 | -0.4026 |
| At5g01750 | Unknown Protein                                                                                            | 62.0850 | -0.1003 |
| At5g05200 | Abc1 Family Protein                                                                                        | 39.4510 | 0.0374  |
| At5g14040 | Phosphate Transporter                                                                                      | 47.7900 | -0.3445 |
| At5g15490 | Udp-Glucose 6-Dehydrogenase, Putative                                                                      | 49.4480 | -0.2707 |
| At5g23740 | Rps11-Beta (Ribosomal Protein S11-Beta); Structural Constituent Of Ribosome                                | 47.7420 | -0.3773 |
| At5g24710 | Unknown Protein                                                                                            | 34.7590 | 0.0256  |
| At5g26360 | Chaperonin, Putative                                                                                       | 37.4760 | -0.2310 |
| At5g27640 | Tif3b1 (Eukaryotic Translation Initiation Factor 3b); Nucleic Acid Binding / Translation Initiation Factor | 47.4700 | -0.4395 |
| At5g35630 | Gs2 (Glutamine Synthetase 2)                                                                               | 40.8980 | -0.1428 |
| At5g47500 | Pectinesterase Family Protein                                                                              | 50.9860 | -0.0380 |
| At5g53300 | Ubc10 (Ubiquitin-Conjugating Enzyme 10); Ubiquitin-Protein Ligase                                          | 58.7410 | -0.3385 |
| At5g53560 | Atb5-A (Cytochrome B5 A)                                                                                   | 44.1860 | -0.1322 |
| At5g55280 | Ftsz1-1 (Ftsz1-1); Structural Molecule                                                                     | 35.0120 | 0.0521  |
| At5g58420 | 40s Ribosomal Protein S4 (Rps4d)                                                                           | 52.9880 | -0.3444 |
| At5g66140 | Pad2 (20s Proteasome Alpha Subunit D2); Peptidase                                                          | 51.9650 | -0.5482 |

**Supplementary Table 9:** Details of Arabidopsis tissue specific lowly expressed genes. GC<sub>3</sub> represents GC content at third codon position; wRn corresponds to error minimization values for individual Arabidopsis genes.

| <b>ARABIDOPSIS TISSUE SPECIFIC LOWLY EXPRESSED GENES</b> |                                                                                     |                       |            |
|----------------------------------------------------------|-------------------------------------------------------------------------------------|-----------------------|------------|
| <b>GENE ID</b>                                           | <b>Functional Description</b>                                                       | <b>GC<sub>3</sub></b> | <b>wRN</b> |
| At1g03010                                                | Phototropic-Responsive NPH3 Family Protein                                          | 39.1600               | 0.0848     |
| At1g11800                                                | Endonuclease/Exonuclease/Phosphatase Family Protein                                 | 44.3910               | 0.0301     |
| At1g13580                                                | Lag13 (Lag1 Longevity Assurance Homolog 3)                                          | 41.3790               | 0.1075     |
| At1g13920                                                | Remorin Family Protein                                                              | 39.2280               | 0.0335     |
| At1g18800                                                | NRP2 (NAP1-RELATED PROTEIN 2); DNA Binding / Chromatin Binding / Histone Binding    | 44.6510               | 0.0515     |
| At1g28010                                                | PGP14 (P-GLYCOPROTEIN 14); Atpase, Coupled To Transmembrane Movement Of Substances  | 39.3710               | 0.3670     |
| At1g34130                                                | STT3B (STAUROSPORIN AND TEMPERATURE SENSITIVE 3-LIKE B); Oligosaccharyl Transferase | 43.6260               | -0.0577    |
| At1g47550                                                | Unknown Protein                                                                     | 38.0050               | 0.2038     |
| At1g49180                                                | Protein Kinase Family Protein                                                       | 38.2750               | -0.0489    |
| At1g49910                                                | WD-40 Repeat Family Protein / Mitotic Checkpoint Protein, Putative                  | 34.4720               | 0.1891     |
| At1g56130                                                | Leucine-Rich Repeat Family Protein / Protein Kinase Family Protein;                 | 39.1480               | 0.2365     |
| At1g62310                                                | Transcription Factor Jumonji (Jmjc) Domain-Containing Protein                       | 36.0410               | 0.3533     |
| At1g62860                                                | Hypothetical Protein                                                                | 43.4870               | -0.2307    |
| At1g69440                                                | Ago7 (Argonaute7)                                                                   | 39.9350               | -0.0015    |
| At1g74110                                                | CYP78A10 (Cytochrome P450, Family 78, Subfamily A, Polypeptide 10); Oxygen Binding  | 51.0890               | -0.3194    |
| At2g01900                                                | Endonuclease/Exonuclease/Phosphatase Family Protein                                 | 41.4140               | 0.3752     |
| At2g03620                                                | Magnesium Transporter Cora-Like Family Protein (MRS2-5)                             | 39.7440               | 0.0368     |
| At2g05910                                                | Unknown Protein                                                                     | 44.6240               | 0.3134     |
| At2g07698                                                | ATP Synthase Alpha Chain                                                            | 40.6640               | 0.0452     |
| At2g16730                                                | BGAL13 (Beta-Galactosidase 13); Beta-Galactosidase                                  | 44.3870               | -0.0698    |
| At2g17140                                                | Binding                                                                             | 40.8820               | 0.2452     |
| At2g19440                                                | Glycosyl Hydrolase Family 17 Protein                                                | 38.5780               | 0.0586     |
| At2g20750                                                | Atexpb1 (Arabidopsis Thaliana Expansin B1)                                          | 56.2260               | -0.1472    |
| At2g21480                                                | Protein Kinase Family Protein                                                       | 41.1120               | 0.0209     |
| At2g21960                                                | Unknown Protein                                                                     | 41.7680               | -0.0834    |
| At2g26350                                                | PEX10 (Peroxin 10); Protein Binding / Zinc Ion Binding                              | 35.0340               | 0.2080     |
| At2g30530                                                | Unknown Protein                                                                     | 39.7630               | -0.1942    |
| At2g35720                                                | DNAJ Heat Shock N-Terminal Domain-Containing Protein                                | 39.1130               | 0.2766     |
| At2g41670                                                | GTP-Binding Family Protein                                                          | 38.9190               | -0.0936    |
| At2g44525                                                | Unknown Protein                                                                     | 40.3730               | 0.0284     |
| At2g46050                                                | Pentatricopeptide (PPR) Repeat-Containing Protein                                   | 39.4970               | 0.1114     |
| At3g02330                                                | Pentatricopeptide (PPR) Repeat-Containing Protein                                   | 41.1470               | 0.2699     |
| At3g03420                                                | Ku70-Binding Family Protein                                                         | 33.7020               | 0.3163     |
| At3g05640                                                | Protein Phosphatase 2C, Putative / PP2C, Putative                                   | 47.4780               | 0.1426     |
| At3g08620                                                | KH Domain-Containing Protein                                                        | 37.2090               | 0.2269     |
| At3g12040                                                | DNA-3-Methyladenine Glycosylase (MAG)                                               | 34.7280               | -0.0331    |
| At3g20300                                                | Extracellular Ligand-Gated Ion Channel                                              | 44.9310               | -0.1784    |
| At3g27470                                                | Unknown Protein                                                                     | 41.9790               | 0.0677     |

|           |                                                                                                       |         |         |
|-----------|-------------------------------------------------------------------------------------------------------|---------|---------|
| At3g45070 | Sulfotransferase Family Protein                                                                       | 39.9330 | 0.0545  |
| At3g46340 | Leucine-Rich Repeat Protein Kinase, Putative                                                          | 35.0540 | 0.2975  |
| At3g50100 | Exonuclease Family Protein                                                                            | 34.2250 | 0.3060  |
| At3g53090 | UPL7 (Ubiquitin-Protein Ligase 7); Ubiquitin-Protein Ligase                                           | 34.7660 | 0.1938  |
| At3g56220 | Unknown Protein                                                                                       | 37.3240 | 0.0383  |
| At3g57910 | D111/G-Patch Domain-Containing Protein                                                                | 36.9860 | -0.0687 |
| At4g19460 | Glycosyl Transferase Family 1 Protein                                                                 | 48.0210 | 0.1767  |
| At4g21300 | Pentatricopeptide (PPR) Repeat-Containing Protein                                                     | 35.3300 | 0.0537  |
| At4g23160 | Protein Kinase Family Protein                                                                         | 51.1540 | -0.0192 |
| At5g03030 | DNAJ Heat Shock N-Terminal Domain-Containing Protein                                                  | 35.1850 | -0.1943 |
| At5g04500 | Glycosyltransferase Family Protein 47                                                                 | 40.9900 | -0.0596 |
| At5g10620 | Unknown Protein                                                                                       | 40.9840 | -0.0462 |
| At5g14670 | ATARFA1B (ADP-Ribosylation Factor A1B); GTP Binding / Phospholipase Activator/ Protein Binding        | 51.6850 | -0.3622 |
| At5g15300 | Pentatricopeptide (PPR) Repeat-Containing Protein                                                     | 37.8660 | -0.0196 |
| At5g17270 | Tetratricopeptide Repeat (TPR)-Containing Protein                                                     | 39.4380 | 0.0669  |
| At5g18390 | Pentatricopeptide (PPR) Repeat-Containing Protein                                                     | 44.6760 | -0.2984 |
| At5g19020 | Pentatricopeptide (PPR) Repeat-Containing Protein                                                     | 44.2700 | -0.1441 |
| At5g24940 | Protein Phosphatase 2C, Putative / PP2C, Putative                                                     | 34.9280 | 0.0759  |
| At5g26860 | LON_ARA_ARA (Lon Protease Homolog Gene); ATP Binding / ATP-Dependent Peptidase/ Serine-Type Peptidase | 39.7890 | -0.0031 |
| At5g42990 | UBC18 (Ubiquitin-Conjugating Enzyme 16); Ubiquitin-Protein Ligase                                     | 38.3120 | 0.1699  |
| At5g54170 | Unknown Protein                                                                                       | 38.6850 | 0.0030  |
| At5g57110 | ACA8 (AUTOINHIBITED CA2+ -ATPASE, ISOFORM 8); Calmodulin Binding                                      | 33.5080 | 0.1082  |
| At5g57890 | Anthranilate Synthase Beta Subunit, Putative                                                          | 39.5260 | -0.0315 |
